# Supplementary material for: Large language models completely understand molecular characteristics of squamous cervical cancer
Source: Research Square preprint supplement (doi:10.21203/rs.3.rs-2855719/v1), 2023-05-30
Supplement: Supplementary file 1 [file 221d82a6b4b76441fccd3690.xlsx]

## Sheet: Summary
Table S5. The correlation between clinical subtypes and molecular subtypes, the list of top 10 tumor- and subtype-specific candidate biomarker combinations, 37 actionable kinases, and the expression matrix of 10,235 proteins in 29 single-cell subtypes.
Sheet	Description
Table S5A	The correlation between clinical subtypes and proteome-, transcriptome- and phosphoproteome-based subtypes.
Table S5B	The details of top 10 tumor- and subtype-specific biomarker combinations.
Table S5C	The details of 37 predicted actionable kinases.
Table S5D	The expression matrix of 10,235 proteins in 29 deconvoluted single-cell subtypes.

## Sheet: Table S5A
Table S5A. The correlation between clinical subtypes and proteome-, transcriptome- and phosphoproteome-based subtypes.
Method	Omics	p-valuea
Original subtypes	Proteome-based	0.312327
	Phosphoproteome-based	0.577566
	Transcriptome-based	0.989598
cLCM subtypes	Proteome-based	0.0048
	Phosphoproteome-based	0.0149
	Transcriptome-based	0.6943
a, p-vale of chi-square test for correlation analysis between clinical subtypes and molecular subtypes.

## Sheet: Table S5B
Table S5B. The details of top 10 tumor- and subtype-specific biomarker combinations.
Type	Protein combination	AUC
Tumor-specific	GINS3,STAT1,DNAJB11,EXOSC1,DSG2	0.976881
	KRT222,TAPBP,STAT1,DSG2,PCNA	0.97162
	ITGB6,TAPBP,SLC1A5,DSG2,PCNA	0.970743
	GBP1,BRI3BP,OCIAD2,DTX3L	0.96875
	MCM2,MCM3,BRI3BP,OCIAD2,DCUN1D1	0.968511
	ITGB6,GALNT3,BRI3BP,MCM5,DTX3L	0.966916
	ABRACL,MCM3,HIST1H2BK,OCIAD2,U2AF1L5	0.9658
	DHCR24,SLC16A3,SERPINB5,RBM8A,EPCAM	0.965561
	ITGB6,MCM6,HIST1H2BL,PARP9	0.953444
	ITGB6,MCM2,TNC,TAP2,TMEM164	0.946508
Subtype-specific (S-I)	KRT4,SPRR2D,SFN,DSG3	0.929325
	A2ML1,CALML3,DSG3,SERPINB5,PKP3	0.927726
	CLIC3,SPRR2D,SFN,S100A14	0.92133
	KRT5,SDC1,CALML3,DSG3,RHCG	0.920371
	KRT4,KRT20,LY6D,ANXA8L1,RHCG	0.919731
	SPRR2D,DSG3,PKP1,PKP3	0.918452
	CALML3,DSG3,SERPINB4,FABP5	0.912056
	DSG3,KRT20,PKP1,SERPINB12,PKP3	0.910777
	CLIC3,DSG3,SPRR2B,SERPINB4	0.90662
	A2ML1,SPRR2B,SERPINB5,PKP1,S100A14	0.903742
Subtype-specific (S-II)	COCH,COX7A2,S100A10,PPA1,D2HGDH	0.819716
	NDUFAB1,SPINT1,MCM2,KIF11,S100A10	0.817798
	COCH,POLD2,GPD1L,GSTK1	0.817798
	COCH,GALNT3,DCUN1D2,GSDMB,FERMT1	0.811277
	SPINT1,COCH,CTSB,ERP29,POLE2	0.810894
	JUP,KIF11,TGM3,FERMT1	0.808976
	RBM47,COCH,KIF11,FERMT1,HTATIP2	0.807825
	PLSCR1,COCH,RPL10,GPD1L,USP28	0.805907
	LIG1,GBP2,TGM3,RPS4Y2,FERMT1	0.802071
	KIF11,EBP,CYBRD1,GPD1L	0.800921
Subtype-specific (S-III)	HRG,DAG1,ITPR1,COLEC12,SERPINA10	0.976799
	SERPINC1,SERPINA7,DPP4,STXBP1,COLEC12	0.976799
	APCS,HRG,F13B,AZGP1,ITPR1	0.969223
	IGHV3-43,NRP1,APCS,SERPINF2,DAG1	0.96875
	KNG1,MFAP4,CFHR1,NRIP2,FETUB	0.967803
	C9,KLKB1,SERPIND1,LBP,PROCR	0.963068
	LAMA5,AGT,SERPINA7,C1S	0.961174
	C3,IGHV1-46,ACAN,C4BPB,FETUB	0.953125
	C1R,IGHD,APOH,AHSG,PGLYRP2	0.952652
	CP,C5,IGHG4,GSN,SERPINA2	0.952178

## Sheet: Table S5C
Table S5C. The details of 37 predicted actionable kinases.
PK	UniProt ID	Family	P value
DYRK1B	B4DFW7	CMGC	<1.58E-303
CDKL4	C7G533	Other/AUR/AUR-B	<1.58E-303
HIPK2	O43781	CMGC/DYRK	<1.58E-303
CDK4	O75116	AGC/DMPK/ROCK	<1.58E-303
CDKL1	Q00532	CAMK/PKD	<1.58E-303
CDK16	P11802	CMGC/CDK	<1.58E-303
SRPK3	Q9UPE1	CMGC/CDK/CDC2	<1.58E-303
MTOR	P42345	Atypical/PIKK/FRAP	<1.58E-303
CLK1	P49336	CMGC/CDK	<1.58E-303
ICK	Q9UPZ9	CMGC	<1.58E-303
CDK7	P50613	CMGC/CDK	<1.58E-303
CDK9	P50750	CMGC/CDK	<1.58E-303
HIPK4	Q8NE63	CMGC	<1.58E-303
CDK17	Q00536	CMGC/CDK	<1.58E-303
CDK8	Q00537	CMGC/CDK	<1.58E-303
CDK18	Q07002	CMGC/CDK	<1.58E-303
CHEK2	O96017	CAMK/CAMK2	<1.58E-303
MAK	P20794	CAMK/CAMK2	<1.58E-303
SRPK2	Q13627	CMGC/DYRK	<1.58E-303
CDK13	Q14004	CMGC/CDK	<1.58E-303
DYRK3	Q2NME9	CMGC	<1.58E-303
CDKL2	B4DH08	CMGC	<1.58E-303
CLK3	Q59FC5	CMGC/DYRK	<1.58E-303
CDK20	Q8IZL9	CMGC/CDK	<1.58E-303
CLK2	P49760	CMGC/DYRK	<1.58E-303
CDK15	Q96Q40	CMGC/CDK	<1.58E-303
CDKL5	O76039	CAMK/PKD	<1.58E-303
PLK1	Q9H2X6	CMGC/DYRK	<1.58E-303
CDK12	Q9NYV4	CMGC/CDK	<1.58E-303
HIPK1	Q86Z02	CMGC	<1.58E-303
DYRK1A	Q9Y463	CMGC/DYRK	<1.58E-303
CLK4	Q9HAZ1	AGC/DMPK	<1.58E-303
CHEK1	O14757	AGC/DMPK	2.27676e-287
CDK2	P24941	AGC/DMPK/ROCK	6.21989e-248
PLK2	Q9NYY3	STE/STE20	1.60889e-197
CDK6	Q00534	CMGC	5.28168e-114
CDK14	O94921	CMGC	5.28168e-114

## Sheet: Table S5D
Table S5D. The expression matrix of 10,235 proteins in 29 deconvoluted single-cell subtypes.
UniProt ID	Gene name	KRT85/86+	KRT82/31+	SPRR+	SCGB+	RABIF+	TRIP13+	TFAP4+	KRT75/76+	ALPL+	IGLL1+	MBOAT1+	STAT5A+	ABCD1+	TRMT2B+	TLE1+	PLD2+	PSMD4+	PVALB+	COL4A2+	HMGCL+	FEM1B+	FMNL1+	LUM+	POLR1B+	HPR+	ELL+	AKAP4+	GNAT2+	OGN+
O43790	KRT86	1140.39	199.305	1.83719	135.591	6.37083	0.986329	69.8294	1.09323	5.59538	14.9664	33.3757	14.8627	17.7204	0	18.218	2.23048	0.0394968	133.173	22.8972	34.3639	35.0519	23.4557	108.952	49.2583	35.0437	18.6546	18.7804	0	12.491
P78386	KRT85	1269.97	391.921	0	233.714	0	0	117.013	0	0	28.2394	62.5289	27.0581	28.6564	0	31.8006	0.94646	0	254.739	20.2299	66.6507	65.7399	7.1116	194.186	92.9506	65.1343	30.2271	27.0387	0	27.88
Q6PK04	CCDC137	44.2205	13.6222	1.28807	6.83381	1.14128	6.55821	18.6199	0.586471	0.426101	0.692389	4.79776	0.417428	0.201347	1.09688	2.22598	1.12439	0.826828	19.4695	12.2744	5.1099	2.03998	5.64454	19.2696	4.45009	9.13814	3.73784	2.43186	0.952633	3.22837
A0A0C4DH33	IGHV1-24	18.9692	0.617056	13.1798	9.66764	5.1142	5.41544	7.78331	8.24026	0.732526	3.47007	0.054399	3.11893	2.72563	5.44099	0.482077	1.88483	1.24167	0.618048	5.14541	0.260111	0.449225	1.42712	0.19588	0.771327	7.34918	0.860665	0.922075	7.695	2.57032
Q9NSA3	CTNNBIP1	227.83	157.003	177.72	169.685	96.0131	40.9742	92.3951	160.957	8.77058	35.2294	12.9574	23.1519	35.7002	63.1185	7.77608	1.07966	11.0288	65.8395	53.5823	51.2552	15.1718	11.7813	48.6936	18.788	69.5981	44.3839	40.5036	59.3746	41.38
P82909	MRPS36	29.9698	18.3138	12.263	26.536	12.5805	5.39165	9.95435	3.16996	4.72632	4.16759	3.49217	2.07689	1.50792	2.89335	9.88867	0.760702	1.80321	10.7922	4.98606	3.09776	1.70451	3.77312	15.306	4.6897	9.93848	7.08124	2.80452	4.29151	1.05872
Q9GZP8	IMUP	68.9962	13.8626	62.9887	39.5261	51.4032	21.7064	27.7801	32.4032	14.1845	13.072	5.63769	6.38458	8.502	14.7271	3.58334	0.227713	3.34027	25.2684	22.3012	5.83394	3.10379	11.1859	25.5971	5.91609	26.2323	4.25996	5.32647	23.014	8.00096
Q8WWA1	TMEM40	197.665	180.381	93.2496	60.4898	57.5698	67.6749	88.5141	65.604	10.2495	17.7215	0.278594	10.8044	22.541	22.2584	8.68906	0.455375	8.05791	67.5229	100.908	47.7174	18.0902	58.6424	191.76	64.9375	83.4112	70.2265	77.2385	33.1977	19.1129
O14933	UBE2L6	53.7345	23.9927	36.6873	30.2533	27.0522	33.7398	27.5912	15.5807	8.39083	6.53595	7.61164	3.81254	5.38654	6.66445	5.02179	0.986475	2.59953	22.9497	10.0529	6.24522	3.38497	9.6082	23.1535	5.31821	18.6497	4.99061	4.87959	9.59402	3.82005
Q9H2T7	RANBP17	25.5062	2.35798	2.7685	23.8625	3.76108	5.75076	3.38269	21.0244	4.11111	7.61671	9.52634	1.05285	5.52905	23.2778	21.5787	20.5081	20.5042	3.9598	20.6561	7.06799	4.85872	12.2194	20.3893	19.8445	2.93258	0.25398	1.28712	11.3949	2.46887
O43347	MSI1	0.824252	0.229694	0.21415	0.202603	0.035299	0.227227	0.606761	0.520164	0.793567	0.217618	0.0146539	0.806997	0.184487	0.542871	0.00371224	0.769037	0.107732	0.782494	0.170681	0.205202	0.00620972	0.0987882	0.622448	0.691343	0.0766285	0.216492	0.380004	0.687503	0.523613
Q9NRH3	TUBG2	0.96433	0.0299258	0.0622383	0.167442	0.671991	0.943436	0.677557	0.0637029	0.0212944	0.218656	0.00127585	0.0205757	0.684364	0.351587	0.37077	0.641606	0.230494	0.215587	0.460563	0.254945	0.39671	0.483502	0.744438	0.461493	0.630632	0.132578	0.0454663	0.718249	0.676174
Q9Y3E0	GOLT1B	43.4153	20.5417	31.6	34.9614	28.6413	23.5294	22.7998	19.4452	8.4943	5.22056	6.79284	3.36809	6.05022	5.61978	4.9344	1.16665	1.64478	22.5661	8.74867	6.41493	3.14638	12.1609	21.7955	4.58297	14.3751	4.91219	6.60217	8.47199	5.54262
P49441	INPP1	24.8363	14.0015	24.3096	17.8986	22.1476	13.0724	12.938	15.1206	4.52928	3.36034	3.47093	2.12524	4.62952	3.77924	3.16269	1.14489	1.65818	13.3738	6.63029	4.15841	1.85562	8.75006	15.8389	3.05775	9.86367	3.40524	4.03084	4.78265	2.17653
Q9UJY1	HSPB8	9.4132	1.49132	5.79663	6.11592	2.87956	3.00421	4.23543	4.07903	0.971033	2.33989	0.262676	1.05712	1.3226	2.06273	0.943362	0.284486	0.858718	2.25593	6.91781	1.21342	0.601898	4.02625	1.36129	1.31164	3.48384	0.811104	0.883639	3.2971	1.36695
Q7Z6Z7	HUWE1	35.4041	34.0007	27.7343	26.1543	23.6987	7.71927	16.5614	17.6227	3.09383	4.83508	7.49375	4.50406	8.18438	4.75519	3.96381	0.336623	3.42721	27.2619	11.5793	6.83847	5.3123	9.12263	28.9033	9.15476	13.8411	4.34474	4.55201	5.23007	5.93536
P19387	POLR2C	7.89795	4.22747	5.50002	7.46524	5.94232	2.17781	3.03166	1.28572	2.42992	0.878762	1.05256	1.03752	0.87567	1.1503	3.14523	0.800808	1.04852	2.70992	0.704206	0.61802	1.16707	0.772651	3.51645	0.355921	3.28088	1.86995	0.791407	1.882	1.13248
P49757	NUMB	0.962863	0.0095237	0.646976	0.122186	0.017575	0.843707	0.902469	0.147009	0.0633367	0.671873	0.409617	0.105871	0.256079	0.534129	0.435756	0.130811	0.938605	0.00508214	0.635321	0.072462	0.285303	0.760799	0.688924	0.906399	0.87106	0.554745	0.101878	0.563314	0.378433
Q17RC7	EXOC3L4	0.998453	0.0340929	0.0788199	0.256465	0.981651	0.666349	0.597692	0.735746	0.924779	0.974772	0.559992	0.52497	0.101059	0.77753	0.946099	0.0213911	0.620952	0.778412	0.0516753	0.374203	0.1251	0.0264087	0.381405	0.935813	0.0185545	0.138183	0.402471	0.290627	0.408405
Q66K14	TBC1D9B	0.987359	0.719899	0.803261	0.70155	0.0282429	0.713967	0.688805	0.0324595	0.798457	0.263519	0.0589104	0.0677434	0.189543	0.0962218	0.352892	0.731559	0.85546	0.594746	0.0562063	0.688397	0.657993	0.870047	0.983228	0.639009	0.0285675	0.213974	0.311591	0.492649	0.00434178
P04155	TFF1	0.949858	0.550914	0.142364	0.453284	0.0437521	0.913622	0.760058	0.0130709	0.0725732	0.797452	0.616193	0.14292	0.535421	0.0110576	0.0650974	0.304824	0.458843	0.448834	0.353464	0.121137	0.080175	0.377866	0.703012	0.58461	0.566853	0.248871	0.0769731	0.843773	0.286708
A6NN92	GJE1	0.988628	0.270537	0.965753	0.0731055	0.0227673	0.169382	0.394855	0.269842	0.723936	0.327699	0.9726	0.798274	0.00043224	0.0885277	0.477527	0.0229331	0.423765	0.941489	0.736431	0.360611	0.485926	0.0655045	0.100548	0.53903	0.701905	0.259379	0.276283	0.399945	0.341142
P00441	SOD1	397.289	275.619	329.509	379.782	371.929	234.147	320.525	328.539	95.0658	51.4495	59.541	49.8144	66.0775	60.3719	79.3008	0.668052	13.2436	309.661	231.618	104.396	51.2732	316.132	280.652	84.3925	95.3451	130.516	125.806	89.4517	42.2039
Q9H910	JPT2	57.157	34.8096	56.2896	55.3454	43.502	25.799	22.9195	38.6605	8.48435	4.66216	12.4623	4.92175	10.4381	11.1781	11.4468	1.74468	5.1198	36.6995	28.5221	6.08277	6.29106	30.2657	36.9195	12.8798	25.6868	11.3398	5.56355	10.7715	13.9054
Q16651	PRSS8	36.3252	25.5283	28.4235	27.0974	21.7175	10.2001	21.8251	22.0603	3.58376	4.83053	3.76345	5.72274	4.19413	6.3926	4.42093	1.29762	1.70442	24.8238	31.4292	8.82055	4.23417	23.7813	23.2087	5.31434	11.5833	6.59349	9.7609	10.9374	5.60864
Q8TBC5	ZSCAN18	0.919792	0.332507	0.304655	0.819387	0.0559387	0.0525442	0.815443	0.0709275	0.848586	0.862113	0.7975	0.254481	0.866573	0.912661	0.32091	0.564095	0.431004	0.259609	0.146568	0.606654	0.0452574	0.826607	0.324549	0.0378945	0.639169	0.0445982	0.0981079	0.190696	0.803633
Q8WZ19	KCTD13	0.952758	0.924208	0.692616	0.402964	0.373078	0.765507	0.116926	0.883345	0.21294	0.403152	0.0654624	0.0633734	0.885674	0.278807	0.260801	0.488193	0.71296	0.868018	0.106853	0.00194573	0.941968	0.183287	0.384822	0.300275	0.836787	0.325723	0.347131	0.0483478	0.0797616
Q6NXG1	ESRP1	24.9953	16.3752	23.3482	17.5652	18.193	9.55157	11.8726	15.8143	3.02178	3.39399	4.11725	4.09841	4.76768	5.51368	3.85834	1.33399	2.35344	14.801	10.7841	4.42947	2.25938	8.73104	18.2386	3.77726	10.0586	3.57529	3.84481	6.26667	1.79914
P41225	SOX3	0.988811	0.0262176	0.195868	0.0245702	0.818693	0.694325	0.34456	0.382106	0.314999	0.810072	0.823174	0.048883	0.124931	0.326167	0.207619	0.461436	0.456639	0.619929	0.0571487	0.52234	0.132601	0.56699	0.566775	0.108324	0.665192	0.964695	0.909485	0.0633865	0.840329
Q96ER9	CCDC51	0.936683	0.416171	0.81026	0.252906	0.482435	0.307861	0.576543	0.935162	0.112686	0.61452	0.457821	0.00899375	0.43703	0.207108	0.13634	0.0540123	0.177636	0.360476	0.133622	0.372452	0.89605	0.10061	0.698259	0.130567	0.214205	0.344929	0.252525	0.625724	0.0205506
Q96G28	CFAP36	0.998629	0.419404	0.912412	0.173901	0.130069	0.128229	0.632462	0.329286	0.117309	0.0131989	0.482563	0.6517	0.732205	0.0778861	0.597824	0.0531409	0.108226	0.154296	0.316105	0.673792	0.636138	0.23702	0.628053	0.243135	0.153313	0.661561	0.420406	0.375603	0.0787275
Q14525	KRT33B	29.1212	28.2225	15.1469	26.934	14.1816	7.82137	14.5094	13.5367	2.90999	4.04221	5.83149	3.37032	5.6265	5.599	3.33947	0.503671	1.92371	21.7812	13.8353	8.77796	5.17408	10.7536	19.8476	7.10088	7.91505	6.6137	6.55397	3.79449	7.12214
Q06609	RAD51	0.998583	0.82263	0.366305	0.731851	0.951459	0.00204755	0.0378681	0.14395	0.41343	0.566116	0.839829	0.631942	0.953299	0.169965	0.0310179	0.790252	0.215013	0.880516	0.368193	0.126485	0.0456698	0.400308	0.620588	0.903243	0.940485	0.946795	0.445766	0.258294	0.145841
Q9NVZ3	NECAP2	0.962803	0.0217115	0.936915	0.419958	0.581667	0.36484	0.170879	0.0340864	0.66004	0.636874	0.67873	0.140433	0.793565	0.938256	0.823282	0.869185	0.654717	0.195878	0.739898	0.077698	0.180124	0.581839	0.0223709	0.735372	0.0254298	0.100349	0.827308	0.542838	0.898807
Q9Y2L9	LRCH1	0.997404	0.608582	0.896151	0.368127	0.422207	0.0312645	0.311683	0.198827	0.485489	0.832669	0.569639	0.587173	0.691085	0.664426	0.321193	0.775744	0.332326	0.651447	0.0255675	0.0372025	0.838078	0.965407	0.0454974	0.0832427	0.214586	0.815736	0.0468487	0.164235	0.379519
P0DPD8	EEF1AKMT4-ECE2	0.958565	0.899866	0.036747	0.536246	0.939001	0.819951	0.0769987	0.0857105	0.178579	0.164192	0.852973	0.0360408	0.0936037	0.408657	0.776586	0.784326	0.879014	0.43664	0.34765	0.371122	0.790273	0.556977	0.273981	0.773037	0.126819	0.135386	0.862931	0.144851	0.447411
Q13641	TPBG	0.999393	0.195732	0.178095	0.811139	0.664619	0.01503	0.513143	0.447499	0.17425	0.31472	0.242807	0.0528928	0.288381	0.278432	0.987853	0.721261	0.410935	0.0613202	0.693841	0.354642	0.173741	0.88738	0.253377	0.0835348	0.328653	0.461664	0.351287	0.564925	0.033252
Q6KC79	NIPBL	0.975746	0.394922	0.809755	0.215177	0.295325	0.404193	0.00358611	0.648063	0.0781717	0.627988	0.642578	0.0056365	0.7445	0.866062	0.406287	0.607287	0.592046	0.0118265	0.798294	0.540617	0.227306	0.579613	0.07303	0.485222	0.133161	0.0615313	0.902235	0.524149	0.333821
Q5VWM5	PRAMEF9	0.982728	0.658078	0.31948	0.0418343	0.554672	0.0902101	0.0448687	0.303851	0.0173438	0.98135	0.977208	0.348968	0.463546	0.673338	0.64369	0.367465	0.31349	0.0277115	0.87191	0.650296	0.932854	0.850514	0.252744	0.616547	0.615187	0.145489	0.0833134	0.667744	0.227325
P82980	RBP5	0.990791	0.217563	0.0625438	0.876187	0.0999725	0.164667	0.399144	0.955988	0.815502	0.714378	0.710241	0.319445	0.0412735	0.783722	0.405421	0.327991	0.160787	0.623203	0.55736	0.0581751	0.435594	0.723608	0.699514	0.0874243	0.182132	0.0222642	0.254244	0.487689	0.722364
Q9BYD3	MRPL4	8.58339	4.11723	8.36812	6.37494	5.02694	6.88458	3.83084	5.29923	1.38841	1.43976	1.3113	2.16175	1.66209	1.68006	1.01649	0.650998	0.753699	4.01976	2.70712	1.5319	1.02929	1.71639	3.07294	1.79935	2.7511	0.950256	1.27068	2.59627	1.01523
O60240	PLIN1	0.948896	0.0689696	0.602046	0.637573	0.427783	0.0190688	0.111937	0.0520314	0.623947	0.132892	0.622002	0.292372	0.744109	0.670033	0.375397	0.376234	0.560797	0.140582	0.0273887	0.349884	0.674831	0.499146	0.296832	0.197567	0.82498	0.227686	0.33064	0.00942422	0.481623
P51511	MMP15	0.96252	0.658872	0.672738	0.30181	0.816852	0.778191	0.286469	0.826402	0.118511	0.107865	0.0801502	0.64164	0.333652	0.182002	0.377833	0.0648659	0.464907	0.852949	0.329356	0.318902	0.904874	0.0330677	0.356508	0.226136	0.787801	0.105817	0.300406	0.909797	0.04052
Q9C037	TRIM4	0.998075	0.20299	0.161013	0.866546	0.928128	0.829605	0.511578	0.0272131	0.638406	0.908455	0.652021	0.255278	0.644594	0.126498	0.141433	0.0700779	0.758068	0.267243	0.360693	0.0449438	0.0557975	0.755058	0.440485	0.690518	0.557847	0.0513082	0.438117	0.610657	0.276903
Q8NEZ3	WDR19	0.983067	0.206059	0.898186	0.173371	0.79008	0.20696	0.290759	0.0786158	0.323988	0.256251	0.961764	0.0605985	0.504545	0.9782	0.420534	0.524499	0.269266	0.26271	0.569902	0.257353	0.703716	0.725632	0.104643	0.868722	0.0222035	0.703647	0.0454502	0.207366	0.747459
O60330	PCDHGA12	0.964222	0.619948	0.692849	0.389	0.359538	0.720951	0.00867541	0.0383833	0.763512	0.171594	0.90057	0.818199	0.167801	0.306124	0.147067	0.104683	0.890232	0.643635	0.0343025	0.514176	0.84684	0.360953	0.469731	0.545294	0.704923	0.0242544	0.174864	0.680134	0.259155
P63261	ACTG1	156.717	97.47	147.184	131.3	139.773	96.259	100.344	106.994	29.3977	29.3243	30.9303	21.3889	37.9549	31.7757	26.613	1.07144	9.9966	137.12	115.022	34.4237	19.7612	102.061	138.663	30.9766	68.6559	36.9419	38.8205	38.774	41.7772
Q8NFW8	CMAS	14.6042	8.31698	13.8366	9.70593	9.50901	6.81983	6.36781	9.90814	1.85577	2.2121	2.62179	1.74169	4.02374	3.12754	2.45127	0.942251	1.51145	13.5442	12.9313	4.55485	2.93569	12.5752	12.8757	3.44454	4.83176	3.66447	3.6683	2.50735	1.56091
Q06481	APLP2	0.961834	0.574463	0.441321	0.0171657	0.115519	0.12879	0.912154	0.444515	0.0519435	0.34547	0.0790604	0.949755	0.900874	0.0296552	0.839973	0.715697	0.479893	0.410196	0.395241	0.0173462	0.308029	0.666145	0.587462	0.165057	0.476286	0.371968	0.687061	0.44703	0.839998
Q9ULP9	TBC1D24	0.979081	0.723693	0.110558	0.844995	0.287209	0.571063	0.712469	0.758784	0.765702	0.723507	0.781551	0.419034	0.0431672	0.656175	0.768239	0.205288	0.809931	0.0450344	0.596783	0.152633	0.0965842	0.0885322	0.16005	0.0355188	0.812878	0.760744	0.206847	0.88605	0.193816
P54725	RAD23A	8.44555	5.71043	8.07238	4.39963	6.67273	4.26541	4.2513	4.34447	3.04648	1.55058	1.63715	2.13011	1.89427	1.53016	0.938017	0.762005	1.22056	5.35147	1.00389	1.74668	1.00522	2.09808	6.42678	1.32127	3.68403	0.879357	1.3243	1.81119	1.09813
Q9H4X1	RGCC	0.98491	0.0278939	0.161468	0.552468	0.723416	0.0967472	0.00610435	0.957121	0.590047	0.966173	0.515121	0.398689	0.738973	0.59712	0.174857	0.14467	0.924281	0.946061	0.123609	0.858615	0.829822	0.979126	0.583618	0.200165	0.313441	0.47763	0.0461284	0.386099	0.323503
P52198	RND2	0.995815	0.0254967	0.698695	0.24478	0.801417	0.386665	0.266913	0.241334	0.815545	0.116807	0.0877163	0.234769	0.483115	0.540932	0.158603	0.385191	0.145863	0.740907	0.480792	0.903834	0.234662	0.105465	0.722413	0.163149	0.634017	0.309326	0.00551124	0.436393	0.308938
Q96Q40	CDK15	0.920567	0.243247	0.773962	0.359015	0.205735	0.856203	0.00947513	0.19714	0.282569	0.0620737	0.00963409	0.512433	0.593528	0.140363	0.135649	0.433462	0.324321	0.827574	0.110665	0.54703	0.790893	0.672921	0.711517	0.0656183	0.678983	0.754052	0.778404	0.277933	0.618581
Q96CG8	CTHRC1	0.994585	0.654371	0.826449	0.242564	0.000761308	0.458634	0.264638	0.653348	0.391512	0.215494	0.934779	0.834646	0.0570839	0.346915	0.11998	0.964307	0.866466	0.639635	0.885942	0.954213	0.936617	0.00854738	0.0622137	0.683625	0.184743	0.934415	0.206814	0.569203	0.373503
Q9NZ71	RTEL1	0.969453	0.942048	0.479828	0.407515	0.861549	0.211471	0.0484093	0.0180247	0.536974	0.559325	0.0600654	0.405587	0.152777	0.201976	0.344278	0.746848	0.707194	0.897467	0.743748	0.424955	0.528777	0.771041	0.089747	0.577632	0.100938	0.0438389	0.834066	0.82109	0.206728
Q9Y239	NOD1	0.969841	0.325087	0.802561	0.237953	0.259178	0.576551	0.958379	0.969284	0.0818557	0.506618	0.436692	0.810002	0.353813	0.0492748	0.930186	0.737444	0.106156	0.0546284	0.781932	0.403849	0.520597	0.10963	0.00509669	0.178532	0.541002	0.722226	0.897319	0.719501	0.165263
Q86SZ2	TRAPPC6B	0.791061	0.561348	0.301469	0.380699	0.0279499	0.287536	0.127847	0.111316	0.45284	0.249505	0.278528	0.61464	0.38573	0.652344	0.142844	0.105104	0.478086	0.642279	0.00601907	0.757388	0.604573	0.696667	0.307398	0.0859277	0.699989	0.654139	0.178367	0.463796	0.000347305
Q15819	UBE2V2	0.974267	0.0158595	0.572446	0.348104	0.0739546	0.91212	0.169218	0.77594	0.263985	0.573772	0.424628	0.487008	0.843905	0.957142	0.702904	0.43439	0.203023	0.300719	0.0166865	0.478768	0.252597	0.936447	0.0327936	0.83417	0.672268	0.382613	0.259095	0.127185	0.240125
Q0JRZ9	FCHO2	0.98906	0.237824	0.147325	0.687535	0.108859	0.0995467	0.0367763	0.00413382	0.550496	0.765041	0.305536	0.671583	0.789946	0.479518	0.922325	0.633763	0.214091	0.355865	0.984944	0.602965	0.187479	0.190001	0.123141	0.322547	0.234564	0.834214	0.405626	0.978077	0.480208
Q14722	KCNAB1	0.995774	0.595969	0.087483	0.522655	0.503032	0.634884	0.0849088	0.809845	0.230769	0.254849	0.971895	0.391346	0.105522	0.265483	0.300357	0.0465025	0.161158	0.180882	0.087766	0.344164	0.901308	0.786157	0.13534	0.308543	0.411295	0.533598	0.273898	0.937902	0.221967
Q30167	Q30167	0.996006	0.709724	0.960211	0.0490112	0.152086	0.558789	0.00214657	0.292514	0.374369	0.662485	0.553411	0.48878	0.0776855	0.178395	0.62251	0.625557	0.77252	0.265648	0.563283	0.493811	0.733335	0.577984	0.185373	0.716044	0.0508225	0.326803	0.246026	0.0110726	0.86227
Q96MU7	YTHDC1	0.982083	0.870286	0.349683	0.850262	0.61454	0.167506	0.0699747	0.640129	0.682321	0.017611	0.959361	0.265485	0.400064	0.00622274	0.109881	0.263006	0.689689	0.859959	0.553302	0.394707	0.895254	0.177458	0.712289	0.392796	0.31024	0.281974	0.502716	0.909345	0.0294499
Q9BSJ2	TUBGCP2	4.12343	1.9004	3.02067	2.60824	1.32616	1.5146	2.32872	1.9665	0.94566	0.777181	0.722772	1.17037	0.685871	1.31566	0.475829	0.704013	0.84576	0.632509	1.07882	0.387499	0.123892	0.250944	0.862345	0.488292	1.63959	0.39652	0.320366	1.87373	0.986017
Q9P0X4	CACNA1I	0.92091	0.82655	0.118114	0.2001	0.330086	0.886197	0.687149	0.438196	0.552771	0.0473724	0.0352337	0.000679913	0.702647	0.583727	0.697962	0.383519	0.0165029	0.137161	0.157184	0.172228	0.802708	0.341067	0.561473	0.474492	0.56385	0.67376	0.851115	0.809912	0.378666
P20585	MSH3	0.974031	0.350044	0.769261	0.69129	0.204153	0.764754	0.405962	0.340943	0.75613	0.11956	0.380887	0.701942	0.256831	0.0256349	0.881807	0.899657	0.937991	0.525873	0.0451317	0.34113	0.100463	0.0097219	0.295722	0.476308	0.703178	0.0167439	0.506294	0.432852	0.371277
Q8N5N7	MRPL50	0.98793	0.0426687	0.501487	0.519891	0.332447	0.510505	0.492754	0.611522	0.86215	0.605102	0.000504931	0.455033	0.896698	0.448723	0.0846618	0.774796	0.679611	0.150325	0.0508742	0.409912	0.229904	0.105811	0.375956	0.860768	0.871064	0.864308	0.870009	0.0433647	0.266201
P46379	BAG6	14.1559	8.58465	10.6013	8.76315	11.4213	6.6097	7.68025	7.84119	2.64705	2.23598	2.25731	0.995054	1.66238	2.64098	2.15285	1.91713	0.794695	11.1168	4.58093	3.23782	2.19809	6.98824	10.0565	2.67663	4.47191	3.17764	3.30552	3.54702	1.67014
P13473	LAMP2	72.4232	58.9617	71.234	65.4054	65.6111	40.6977	42.7669	56.7651	13.1638	13.0143	12.2908	8.10989	15.9044	20.6033	10.2972	1.22787	5.74784	60.2089	54.9634	23.8705	8.61334	41.003	67.3843	14.9896	30.2238	23.7555	23.4365	18.4743	28.6328
Q8IYR2	SMYD4	0.853331	0.735723	0.338316	0.117921	0.0073616	0.537136	0.542652	0.769464	0.829811	0.256453	0.624351	0.0423717	0.283279	0.363279	0.134076	0.607942	0.35372	0.224343	0.638454	0.549471	0.0277349	0.711894	0.593706	0.159853	0.783926	0.107633	0.0898052	0.8193	0.303004
O14893	GEMIN2	0.931356	0.279457	0.342788	0.359903	0.534613	0.338739	0.85177	0.0257485	0.614912	0.766333	0.819869	0.0485876	0.457359	0.659323	0.694502	0.0117995	0.0209079	0.224959	0.268629	0.604132	0.487688	0.719466	0.201211	0.00245657	0.57438	0.400602	0.749065	0.836275	0.355719
Q13158	FADD	0.978782	0.859811	0.420805	0.0515313	0.18757	0.424384	0.80314	0.0831439	0.433863	0.61831	0.268806	0.33193	0.960265	0.0333608	0.11196	0.765688	0.87315	0.203082	0.813193	0.874009	0.627319	0.176002	0.889256	0.0890159	0.781489	0.240546	0.720736	0.38112	0.165883
Q01973	ROR1	0.994526	0.128088	0.6433	0.153114	0.105063	0.134256	0.607206	0.292934	0.917823	0.00430652	0.18519	0.204213	0.546579	0.801808	0.709378	0.0952778	0.543202	0.462504	0.385801	0.804555	0.288116	0.498776	0.428762	0.185066	0.332842	0.602816	0.394351	0.733157	0.0204772
P31995	FCGR2C	0.99233	0.832464	0.21077	0.243387	0.210642	0.231969	0.509126	0.950352	0.133997	0.732475	0.856247	0.965522	0.905848	0.390338	0.736264	0.429093	0.216172	0.838293	0.189766	0.110812	0.578	0.0154019	0.430348	0.181855	0.935419	0.361361	0.787707	0.33028	0.0105419
Q9NX00	TMEM160	0.90206	0.748321	0.794371	0.0863866	0.305531	0.710722	0.547686	0.626103	0.25514	0.253572	0.236528	0.492851	0.129964	0.0804526	0.569453	0.0143717	0.163401	0.204776	0.476141	0.0193165	0.39675	0.6155	0.444391	0.113956	0.600721	0.0566056	0.609418	0.453047	0.529427
Q8WUX2	CHAC2	0.938534	0.883324	0.323398	0.416653	0.178736	0.423298	0.589934	0.454043	0.53976	0.555426	0.02627	0.542112	0.886619	0.407415	0.726828	0.0288998	0.330942	0.546851	0.719262	0.21367	0.097608	0.15344	0.101825	0.171253	0.906743	0.111598	0.873405	0.140637	0.817303
Q9ULX3	NOB1	0.963966	0.656051	0.736541	0.357929	0.80516	0.266654	0.177463	0.163135	0.528038	0.84739	0.0591165	0.914493	0.575264	0.957365	0.914795	0.0134102	0.393655	0.417541	0.362023	0.173938	0.959994	0.221533	0.731724	0.0711492	0.219652	0.515536	0.638314	0.0543413	0.293664
O14949	UQCRQ	0.933041	0.0769215	0.549844	0.42818	0.693735	0.720694	0.798563	0.13763	0.0901813	0.0763748	0.00255274	0.630514	0.914958	0.246755	0.126323	0.349295	0.502392	0.293634	0.869726	0.668148	0.379959	0.215862	0.525336	0.659047	0.407742	0.15007	0.222759	0.785483	0.180271
Q8TE77	SSH3	0.999743	0.70518	0.703099	0.776257	0.050684	0.975137	0.510238	0.183408	0.8823	0.942084	0.647905	0.689645	0.819376	0.0991939	0.078002	0.102907	0.56138	0.657716	0.126676	0.372325	0.931179	0.182486	0.366927	0.0397008	0.0488969	0.585482	0.500628	0.674286	0.483829
P16422	EPCAM	20.5248	14.9419	18.7834	16.516	13.2829	17.6482	11.9331	8.52956	3.03575	4.07634	4.20036	2.73848	4.11777	3.81438	4.14517	1.11198	2.19376	15.765	13.9205	4.46758	2.6854	11.0625	13.4646	5.12438	7.99189	4.41756	4.45553	3.86033	5.16362
Q96BY9	SARAF	0.983941	0.154603	0.0987386	0.401027	0.512948	0.679633	0.499358	0.887597	0.756315	0.246723	0.664587	0.373739	0.21468	0.465903	0.717055	0.37925	0.590073	0.506128	0.826476	0.030049	0.0420862	0.667309	0.035976	0.249656	0.0479116	0.184769	0.316378	0.702386	0.226405
P24310	COX7A1	0.995731	0.0206317	0.198338	0.390813	0.124453	0.115098	0.214513	0.741543	0.848605	0.713769	0.338331	0.856015	0.125721	0.175966	0.909734	0.761362	0.777296	0.242319	0.67111	0.373186	0.545018	0.891366	0.0580642	0.248912	0.625232	0.921034	0.404474	0.113861	0.482868
Q14674	ESPL1	0.99748	0.724715	0.340434	0.000892933	0.126904	0.887784	0.283487	0.0133965	0.837026	0.187005	0.995193	0.801352	0.48048	0.206344	0.262694	0.361226	0.137082	0.396962	0.767962	0.211077	0.578257	0.487594	0.772192	0.119594	0.799411	0.430215	0.258165	0.356446	0.420364
Q9NYQ6	CELSR1	0.956421	0.0600277	0.407096	0.0118333	0.642709	0.132647	0.281222	0.225935	0.781011	0.0795732	0.249629	0.299433	0.80991	0.821929	0.377497	0.32721	0.806135	0.640084	0.885696	0.0318441	0.795243	0.278345	0.230687	0.267074	0.840115	0.603677	0.471804	0.222369	0.572785
O95864	FADS2	0.987128	0.0989109	0.117259	0.0479468	0.730282	0.281401	0.204488	0.945156	0.454961	0.766037	0.582482	0.356396	0.301123	0.119519	0.208212	0.522688	0.601394	0.374761	0.877298	0.498815	0.117491	0.787885	0.801705	0.388562	0.0458119	0.457795	0.093985	0.454534	0.939098
Q9Y244	POMP	0.992168	0.291049	0.979359	0.177811	0.0824519	0.557567	0.139555	0.190548	0.683402	0.951383	0.226833	0.336655	0.193473	0.092238	0.155738	0.545968	0.380056	0.374862	0.0052516	0.989726	0.735777	0.580613	0.899567	0.766695	0.954079	0.322439	0.638831	0.941412	0.935175
Q92785	DPF2	0.97872	0.095416	0.916134	0.0111277	0.314987	0.381958	0.400039	0.803733	0.897012	0.38276	0.457629	0.577242	0.445567	0.254934	0.746238	0.958717	0.854739	0.715422	0.457516	0.370021	0.951369	0.0857879	0.0608483	0.0492332	0.523296	0.935875	0.469977	0.40092	0.0728095
Q6NUQ1	RINT1	0.985746	0.025263	0.301879	0.602521	0.787274	0.125545	0.330193	0.578546	0.506109	0.985204	0.0195852	0.0928708	0.138436	0.675574	0.0734814	0.275436	0.684851	0.165944	0.547266	0.860848	0.2779	0.528563	0.974067	0.61141	0.39787	0.383018	0.717361	0.647136	0.985514
Q6EMK4	VASN	0.984794	0.88841	0.186439	0.0199502	0.696601	0.233631	0.289591	0.442236	0.922961	0.711553	0.640394	0.426726	0.0484555	0.473349	0.0812809	0.194997	0.284566	0.58153	0.0708549	0.885877	0.438826	0.59221	0.734926	0.433464	0.173523	0.10477	0.421608	0.858022	0.53723
Q93096	PTP4A1	0.944164	0.910827	0.0163342	0.1436	0.635173	0.504032	0.68011	0.577148	0.216643	0.692016	0.610004	0.538757	0.624671	0.155718	0.217617	0.66532	0.728354	0.355508	0.735544	0.609269	0.25185	0.170767	0.0517661	0.529318	0.312841	0.92268	0.621107	0.00883571	0.0875332
P05165	PCCA	0.970671	0.638791	0.522554	0.353855	0.115216	0.412379	0.144211	0.352412	0.065737	0.267285	0.61252	0.843384	0.680162	0.737026	0.0989557	0.440361	0.327741	0.519877	0.65139	0.0915708	0.0343261	0.764974	0.336381	0.330004	0.0241703	0.313124	0.625723	0.181939	0.624426
Q15274	QPRT	0.985976	0.813649	0.801155	0.0886894	0.745881	0.340659	0.154882	0.0793776	0.44953	0.277327	0.56607	0.109153	0.388361	0.240698	0.126881	0.473379	0.0205017	0.592882	0.931196	0.710638	0.170688	0.646046	0.473197	0.0869884	0.676883	0.44708	0.271328	0.454601	0.33976
Q8IUZ5	PHYKPL	0.863824	0.431861	0.792723	0.613188	0.787457	0.330494	0.0531653	0.429525	0.810094	0.748411	0.840969	0.280365	0.350717	0.236432	0.783213	0.144029	0.175508	0.455546	0.0389106	0.147679	0.690174	0.106859	0.710789	0.425217	0.00329967	0.523233	0.182188	0.601465	0.377844
Q9NWR8	MCUB	0.961114	0.714495	0.311327	0.805451	0.243563	0.035384	0.939223	0.310577	0.21163	0.772936	0.0159347	0.408861	0.506758	0.384265	0.692527	0.906486	0.191623	0.405118	0.278862	0.0191838	0.317815	0.470764	0.245062	0.269987	0.937502	0.720552	0.508269	0.495313	0.140627
Q9Y2R9	MRPS7	0.923745	0.418911	0.299597	0.302769	0.638067	0.435008	0.840923	0.683759	0.351375	0.91182	0.0965875	0.632431	0.120344	0.0835959	0.882142	0.538603	0.408534	0.549487	0.448951	0.785033	0.563315	0.121742	0.864177	0.185845	0.44659	0.0929229	0.522322	0.0646309	0.015164
Q9NRP0	OSTC	2893360000000	76718316173	1261110000000	2510690000000	1734990000000	436522000000	2819640000000	2661660000000	1138670000000	1792000000000	2183580000000	2480590000000	1610710000000	1477190000000	486048000000	268809000000	404938000000	2214290000000	430830000000	1626570000000	2536330000000	1430140000000	1769130000000	1097300000000	239616000000	2876910000000	1145720000000	153691000000	848774000000
P57678	GEMIN4	0.999062	0.671936	0.398421	0.671422	0.799287	0.846371	0.750347	0.577724	0.904739	0.0430536	0.622184	0.126018	0.296301	0.637878	0.826197	0.0177751	0.958443	0.179041	0.585502	0.81337	0.600966	0.893998	0.861767	0.0977204	0.968963	0.102989	0.149228	0.0617109	0.895776
Q96HP0	DOCK6	0.944974	0.33365	0.0225602	0.154686	0.31019	0.182366	0.287797	0.0458735	0.691286	0.403042	0.839732	0.6572	0.151871	0.345285	0.667381	0.50809	0.439228	0.0257294	0.470925	0.280523	0.39617	0.944077	0.597565	0.331991	0.604522	0.09686	0.894958	0.515415	0.913809
P10109	FDX1	0.99948	0.707299	0.972463	0.164984	0.73619	0.897387	0.990081	0.836925	0.457083	0.688359	0.525081	0.00745146	0.136135	0.223352	0.253625	0.142363	0.576133	0.933953	0.960955	0.410522	0.852047	0.215437	0.0111739	0.345754	0.665718	0.436359	0.106315	0.488579	0.73215
B4DX44	ZNF736	0.999274	0.791916	0.539719	0.168238	0.620301	0.0731556	0.0207487	0.397437	0.0277792	0.00750544	0.174899	0.72629	0.729996	0.843488	0.87004	0.226818	0.456828	0.677834	0.99557	0.341895	0.88313	0.55656	0.306549	0.432283	0.986857	0.942416	0.982308	0.601363	0.888774
Q01740	FMO1	0.991333	0.822165	0.798981	0.0308118	0.133783	0.14994	0.641734	0.792791	0.87495	0.960882	0.510797	0.0276681	0.244486	0.349578	0.0515225	0.110774	0.700286	0.758157	0.354697	0.139092	0.823869	0.296995	0.481798	0.514966	0.80996	0.885185	0.819548	0.679228	0.909255
Q6DKJ4	NXN	0.950067	0.467139	0.371505	0.673901	0.74131	0.0618468	0.0236845	0.246429	0.0243777	0.750367	0.712665	0.0618221	0.522353	0.0576068	0.305728	0.268381	0.459147	0.7424	0.295738	0.712861	0.837317	0.905368	0.843266	0.909843	0.291368	0.888344	0.862074	0.370158	0.522347
Q9NSC7	ST6GALNAC1	0.9568	0.570897	0.0103061	0.91411	0.183202	0.428228	0.342716	0.40719	0.140365	0.394268	0.746317	0.0707455	0.440666	0.87252	0.941045	0.44346	0.7604	0.00776574	0.347837	0.793666	0.523652	0.133525	0.302311	0.611786	0.751421	0.169162	0.312831	0.293816	0.547504
Q7Z5N4	SDK1	0.992015	0.0352673	0.474829	0.917351	0.405978	0.991249	0.258091	0.59088	0.0521581	0.0702646	0.416339	0.5017	0.906163	0.888089	0.532323	0.244013	0.0637011	0.718574	0.119218	0.411712	0.610737	0.893069	0.824004	0.38463	0.167751	0.704858	0.716351	0.173146	0.624447
P03951	F11	0.921787	0.30001	0.87092	0.673386	0.600976	0.847361	0.767694	0.549547	0.447444	0.00711703	0.161743	0.127594	0.686605	0.854265	0.264591	0.321374	0.0671671	0.250223	0.716815	0.749619	0.379857	0.206775	0.00207535	0.376404	0.795285	0.550804	0.226302	0.414872	0.277423
Q9NQ75	CASS4	5.28713	3.73379	4.3506	4.00134	3.96191	2.62929	2.82841	2.82098	1.05891	0.540633	0.987826	0.842866	1.83696	1.17475	0.779306	0.638205	0.78409	3.01193	1.1033	0.7747	0.783695	1.49629	3.90292	1.67428	2.00037	1.14911	1.28864	1.51389	0.76907
Q5VYS4	MEDAG	0.999597	0.407799	0.375414	0.423435	0.761111	0.949182	0.321966	0.589398	0.811358	0.372152	0.450309	0.822614	0.0840522	0.053029	0.538219	0.251298	0.299728	0.0220982	0.394729	0.911069	0.237378	0.0252431	0.241332	0.270223	0.447301	0.269515	0.270215	0.3241	0.635138
Q15119	PDK2	0.996127	0.508812	0.617418	0.545187	0.817388	0.739602	0.26364	0.694561	0.273132	0.225209	0.141408	0.376964	0.166229	0.135831	0.171421	0.117015	0.0467181	0.251461	0.811074	0.556841	0.168793	0.698092	0.130741	0.649167	0.243923	0.29983	0.938215	0.654184	0.88558
Q9BX67	JAM3	0.943588	0.438734	0.230676	0.819853	0.919616	0.649978	0.0304015	0.263303	0.539186	0.0752848	0.304967	0.101959	0.491123	0.695261	0.533676	0.206778	0.67237	0.337488	0.698807	0.239298	0.760868	0.521996	0.117602	0.38002	0.861069	0.308692	0.0471485	0.157386	0.468749
Q9H0M4	ZCWPW1	0.968507	0.506835	0.93229	0.0284023	0.784002	0.096991	0.857371	0.389796	0.574043	0.830449	0.30532	0.117546	0.399195	0.923451	0.380154	0.479479	0.524483	0.110008	0.682284	0.0439767	0.52262	0.161254	0.751196	0.860228	0.331867	0.0864209	0.804406	0.934653	0.788762
P12104	FABP2	0.969677	0.599893	0.608333	0.714388	0.784221	0.798374	0.728116	0.333829	0.692572	0.542882	0.230749	0.31797	0.176285	0.291231	0.958754	0.347557	0.586673	0.563753	0.0733922	0.0487381	0.0104855	0.30775	0.496012	0.0762895	0.0710199	0.318769	0.799047	0.7547	0.722923
Q9HA77	CARS2	0.961824	0.914767	0.928341	0.142729	0.00070594	0.109734	0.944366	0.613555	0.923705	0.313129	0.0527596	0.20155	0.931673	0.108125	0.368254	0.591876	0.499155	0.806702	0.896609	0.599849	0.345531	0.675207	0.326598	0.666868	0.140285	0.488575	0.932779	0.868546	0.415883
Q13829	TNFAIP1	0.99268	0.989899	0.530836	0.948478	0.470734	0.415792	0.37906	0.593287	0.677826	0.0274897	0.0569924	0.270768	0.594182	0.499072	0.237553	0.621149	0.29077	0.0107656	0.0314665	0.531428	0.504647	0.31571	0.127702	0.67044	0.413073	0.965109	0.719276	0.83826	0.774574
Q86TM6	SYVN1	7.21804	2.9123	6.1176	2.84569	4.19238	3.01385	3.52575	4.22965	0.661079	2.04121	1.06532	1.21968	2.64787	0.504097	1.5913	2.59016	0.836396	4.11784	3.24536	1.87066	0.933504	3.12992	6.43047	1.9204	1.35038	2.09164	2.63858	1.13718	0.38081
Q8TA94	ZNF563	0.960411	0.949303	0.115247	0.135476	0.401272	0.0957453	0.643527	0.760458	0.520818	0.108126	0.79576	0.185639	0.687249	0.116821	0.0991839	0.581707	0.722944	0.706723	0.904613	0.517398	0.083273	0.882702	0.337052	0.952205	0.663061	0.676851	0.260744	0.278562	0.342019
Q96IW7	SEC22A	0.968392	0.144337	0.172995	0.557176	0.828167	0.667834	0.513517	0.421137	0.706051	0.154012	0.946045	0.953314	0.947776	0.344811	0.832655	0.170108	0.0718688	0.570045	0.758461	0.938484	0.47907	0.229232	0.628477	0.09633	0.0764579	0.363943	0.0872609	0.628047	0.920496
O95049	TJP3	0.93569	0.33884	0.782719	0.835366	0.600397	0.289267	0.893105	0.536752	0.468261	0.002975	0.319832	0.868991	0.580035	0.104868	0.0693526	0.481269	0.108252	0.461441	0.612668	0.00111474	0.802465	0.74337	0.834249	0.745143	0.307059	0.631738	0.836735	0.547966	0.126903
Q2VPA4	CR1L	0.999367	0.367076	0.164916	0.891512	0.14135	0.194405	0.635843	0.0409663	0.792228	0.895818	0.616082	0.250216	0.847822	0.600018	0.675963	0.0962136	0.73983	0.180896	0.583877	0.780546	0.218043	0.691648	0.435769	0.553018	0.290373	0.908861	0.140005	0.0808073	0.91043
Q9NRL2	BAZ1A	0.948479	0.664147	0.266865	0.837316	0.786615	0.382031	0.442009	0.165118	0.15313	0.129791	0.698206	0.236221	0.253114	0.351405	0.3668	0.259746	0.72581	0.461312	0.157182	0.805612	0.287172	0.201385	0.413399	0.227426	0.6542	0.0957762	0.798134	0.0191322	0.864579
Q9NVE5	USP40	0.941093	0.398258	0.332427	0.577622	0.189736	0.932215	0.190183	0.177595	0.775276	0.196433	0.531948	0.834086	0.746805	0.168568	0.0451974	0.271329	0.508248	0.923318	0.543044	0.236152	0.124498	0.356512	0.439154	0.39105	0.213001	0.0145235	0.609539	0.403549	0.46079
P09238	MMP10	6.16967	4.07932	4.71684	5.53499	4.96487	1.62776	2.84183	4.92748	1.23792	1.24809	0.88343	0.862742	0.882206	1.90693	0.915739	0.91308	0.434162	4.14771	3.8963	2.27565	1.22233	2.13629	2.91572	1.86242	1.9446	1.59528	1.40046	1.64765	1.74022
Q86XR8	CEP57	0.998912	0.582231	0.84581	0.278987	0.336251	0.655939	0.0434902	0.486512	0.257437	0.135816	0.768721	0.622196	0.783422	0.491145	0.0354322	0.0402804	0.640195	0.276009	0.340735	0.38607	0.246127	0.54224	0.924613	0.403317	0.560099	0.0837948	0.324531	0.960985	0.377364
Q8TEA7	TBCK	0.987765	0.81498	0.269115	0.45192	0.64583	0.430129	0.813661	0.909277	0.487987	0.754937	0.874836	0.774766	0.00242591	0.255801	0.391112	0.318725	0.7652	0.0229436	0.578849	0.50338	0.755548	0.044565	0.577211	0.113123	0.675169	0.976869	0.168444	0.358765	0.224948
P36406	TRIM23	14.2066	8.26878	13.3382	10.5083	11.6698	7.81584	8.08777	6.63593	2.93048	3.17086	2.85427	2.06215	2.64089	3.90555	1.96723	3.03862	1.70441	11.5804	7.77445	2.73033	2.14481	8.79543	11.095	2.97473	6.74901	3.25479	3.65088	4.09256	2.26526
Q13349	ITGAD	0.986321	0.0425605	0.0192346	0.666637	0.591051	0.27089	0.403707	0.969234	0.48782	0.875792	0.145842	0.717886	0.602801	0.140334	0.894456	0.678946	0.836457	0.861291	0.401081	0.0291076	0.199722	0.895525	0.227595	0.913078	0.444257	0.57225	0.438666	0.317295	0.507666
Q5JSP0	FGD3	0.936024	0.843613	0.185087	0.545517	0.314166	0.855782	0.235096	0.92555	0.818462	0.735744	0.160644	0.91638	0.8411	0.601694	0.689667	0.0314165	0.0630885	0.586665	0.746439	0.879233	0.713038	0.61756	0.480924	0.0638257	0.80125	0.134164	0.855037	0.207008	0.122551
P20023	CR2	0.956451	0.878513	0.749509	0.727226	0.952215	0.313949	0.0694704	0.394287	0.902089	0.0177935	0.291284	0.308407	0.665876	0.576993	0.256994	0.0386981	0.795252	0.469968	0.630945	0.0773781	0.953567	0.558263	0.527677	0.394508	0.491439	0.673023	0.93209	0.0709856	0.799698
Q13873	BMPR2	0.940401	0.0857402	0.157144	0.172826	0.423836	0.348776	0.66315	0.875222	0.792978	0.648277	0.511684	0.332767	0.108901	0.67558	0.261338	0.450433	0.144147	0.739133	0.175124	0.0243362	0.700864	0.879125	0.412666	0.407263	0.39243	0.849345	0.134131	0.931875	0.521045
Q6GQQ9	OTUD7B	0.954554	0.765024	0.281757	0.692796	0.814584	0.674842	0.903926	0.582761	0.0636541	0.043135	0.277097	0.816843	0.509624	0.822675	0.25765	0.924941	0.242838	0.664515	0.936411	0.252416	0.387408	0.518209	0.694655	0.193179	0.0258767	0.285798	0.929428	0.359655	0.14212
Q9H0U6	MRPL18	0.993335	0.194068	0.814667	0.753941	0.283008	0.896432	0.622916	0.881222	0.116595	0.217605	0.987776	0.197926	0.526729	0.158589	0.955275	0.0744298	0.328571	0.21507	0.387218	0.214871	0.758256	0.764941	0.149548	0.933813	0.550223	0.123975	0.639813	0.466	0.567346
P07197	NEFM	0.974122	0.632648	0.279026	0.451048	0.559381	0.205394	0.68191	0.273285	0.00885645	0.0505289	0.593852	0.18231	0.660629	0.672756	0.845786	0.104509	0.939713	0.70399	0.892424	0.669792	0.501941	0.318156	0.754149	0.545185	0.853526	0.0129102	0.936846	0.272961	0.74529
Q9NVA1	UQCC1	0.991388	0.209129	0.219912	0.0873207	0.595083	0.24087	0.135838	0.859009	0.643856	0.796244	0.695622	0.156895	0.858607	0.975259	0.481845	0.733978	0.267571	0.163146	0.409964	0.764375	0.0824193	0.253506	0.312867	0.713376	0.777972	0.807556	0.108658	0.706802	0.937838
Q14119	VEZF1	0.993899	0.102829	0.625375	0.48911	0.702795	0.27707	0.193105	0.788011	0.113103	0.742057	0.887758	0.686273	0.25651	0.706858	0.482193	0.51883	0.699474	0.0591246	0.170472	0.467838	0.624662	0.00926543	0.936714	0.991651	0.647736	0.436954	0.892082	0.114335	0.408823
P47974	ZFP36L2	0.984489	0.942218	0.0130324	0.909375	0.791227	0.377395	0.496085	0.928341	0.721641	0.219732	0.396423	0.11214	0.586301	0.27298	0.346236	0.12959	0.933045	0.770574	0.219971	0.646804	0.322243	0.190161	0.257829	0.192873	0.118893	0.510956	0.629601	0.751269	0.504694
Q00056	HOXA4	0.922023	0.301618	0.366168	0.140225	0.246419	0.636623	0.259453	0.539636	0.286263	0.353225	0.154155	0.753142	0.605167	0.0297284	0.799136	0.126582	0.837646	0.354515	0.443408	0.663149	0.00363765	0.725222	0.52085	0.756991	0.735013	0.329166	0.890312	0.259456	0.215591
Q9Y2P8	RCL1	0.965109	0.601676	0.00953406	0.782091	0.432329	0.879995	0.0198106	0.417247	0.846244	0.285312	0.678486	0.598652	0.243009	0.59077	0.844174	0.00200518	0.295266	0.44666	0.259013	0.237741	0.722982	0.240899	0.385253	0.742709	0.8443	0.225116	0.799673	0.504589	0.795573
P02724	GYPA	0.963695	0.589409	0.187231	0.179241	0.457852	0.423249	0.42678	0.0828133	0.770811	0.443795	0.169143	0.296633	0.502811	0.0316964	0.260784	0.683833	0.669597	0.765336	0.64421	0.670551	0.345123	0.864774	0.0149161	0.945639	0.694157	0.654833	0.759375	0.0809915	0.816605
Q9Y5P4	CERT1	0.997849	0.846031	0.674149	0.94721	0.100026	0.718067	0.610264	0.069969	0.458217	0.16036	0.564874	0.293186	0.757714	0.703874	0.181199	0.646253	0.877401	0.458571	0.897013	0.436814	0.8563	0.747715	0.236447	0.764644	0.102541	0.769798	0.0117014	0.115305	0.855565
Q9GZM5	YIPF3	0.97569	0.611852	0.336806	0.423054	0.234431	0.499449	0.0937344	0.753023	0.366746	0.714106	0.276124	0.229069	0.612887	0.710839	0.461166	0.959094	0.167013	0.318453	0.703026	0.706826	0.0239388	0.260006	0.189736	0.207749	0.540556	0.046525	0.195451	0.459517	0.847575
Q96JM2	ZNF462	0.95807	0.466366	0.725791	0.28523	0.639515	0.103048	0.033373	0.106763	0.827657	0.156406	0.394339	0.3425	0.777995	0.0477183	0.901259	0.564336	0.739835	0.483138	0.80939	0.836103	0.663918	0.00894395	0.342916	0.663168	0.514889	0.639618	0.921205	0.491908	0.855698
Q86XA9	HEATR5A	0.980603	0.824904	0.215687	0.338347	0.234534	0.367405	0.491748	0.144802	0.161995	0.0583921	0.590313	0.723929	0.125105	0.707823	0.59414	0.161752	0.464616	0.631526	0.0661806	0.167712	0.763943	0.54189	0.304102	0.440808	0.497366	0.242527	0.479286	0.171402	0.914169
Q5TAX3	TUT4	0.998966	0.578205	0.35966	0.454813	0.0721559	0.483346	0.825672	0.419863	0.661594	0.406379	0.200972	0.181526	0.430256	0.305506	0.1333	0.982524	0.923387	0.279301	0.123724	0.581771	0.963112	0.439317	0.216307	0.474699	0.21828	0.222013	0.0316536	0.440605	0.560642
P01825	IGHV4-59	0.960014	0.886891	0.794128	0.706841	0.360853	0.278912	0.607521	0.846746	0.531662	0.363823	0.206232	0.84699	0.937935	0.324704	0.173478	0.00498401	0.339591	0.126646	0.033248	0.146964	0.772498	0.534499	0.312204	0.769185	0.288902	0.855729	0.497574	0.83582	0.436303
Q6PJ69	TRIM65	0.902417	0.338816	0.772362	0.0741323	0.660346	0.0964331	0.0673243	0.62799	0.57027	0.151971	0.591855	0.503382	0.535765	0.160433	0.323043	0.784182	0.180923	0.540187	0.0700455	0.139346	0.437878	0.886363	0.244923	0.890417	0.869907	0.671272	0.748871	0.654705	0.564459
Q9H7N4	SCAF1	0.999684	0.0584722	0.985371	0.190546	0.693795	0.295735	0.660688	0.123893	0.995196	0.40122	0.51393	0.0539524	0.817269	0.282985	0.748184	0.873975	0.219919	0.143009	0.919382	0.523013	0.561873	0.634196	0.55473	0.55636	0.748141	0.102255	0.20397	0.377865	0.570918
Q16799	RTN1	0.939373	0.917507	0.265174	0.218923	0.557177	0.826717	0.0423643	0.340073	0.253003	0.850495	0.638085	0.627802	0.0479946	0.410436	0.659	0.628776	0.82451	0.886347	0.112867	0.706344	0.358042	0.8079	0.11703	0.304789	0.110675	0.914055	0.472405	0.247964	0.630123
Q8NEZ2	VPS37A	0.99556	0.958271	0.921946	0.375213	0.814163	0.253924	0.386906	0.130878	0.841837	0.379249	0.649243	0.841329	0.153639	0.559446	0.0528652	0.649986	0.809375	0.024692	0.308015	0.842642	0.846732	0.327437	0.686239	0.358913	0.60822	0.547468	0.57628	0.00637294	0.391296
P19793	RXRA	0.980449	0.413359	0.561683	0.280963	0.082006	0.155025	0.969623	0.101531	0.926921	0.163369	0.893553	0.523646	0.39823	0.697538	0.330756	0.897511	0.565383	0.0828317	0.376691	0.667982	0.645941	0.957382	0.904275	0.165755	0.69938	0.637386	0.791409	0.0547288	0.841304
Q92791	P3H4	0.916893	0.305303	0.0321626	0.726106	0.496661	0.630672	0.0864267	0.270925	0.248717	0.507471	0.202621	0.566272	0.510877	0.119567	0.242696	0.811992	0.829274	0.210847	0.769318	0.495092	0.682319	0.71745	0.389717	0.82352	0.776253	0.546906	0.00839411	0.193995	0.461134
Q9UF33	EPHA6	0.999385	0.615033	0.229388	0.258566	0.0290909	0.874296	0.559032	0.967937	0.796293	0.826219	0.363846	0.285282	0.840306	0.472856	0.732613	0.0466976	0.637871	0.852413	0.85657	0.315028	0.400142	0.557485	0.716703	0.997575	0.560183	0.146709	0.240461	0.31287	0.0339916
Q08722	CD47	0.98081	0.667061	0.422116	0.965142	0.393699	0.168541	0.92214	0.148201	0.695519	0.499752	0.968814	0.838082	0.625157	0.166543	0.578314	0.277272	0.662457	0.773411	0.252435	0.517898	0.0848686	0.631868	0.860668	0.522423	0.0825819	0.519658	0.241842	0.194841	0.0436181
Q9Y6X9	MORC2	0.951552	0.710465	0.886281	0.687596	0.879809	0.266574	0.792164	0.213964	0.114169	0.0898366	0.724945	0.487619	0.478387	0.733792	0.824423	0.910368	0.380037	0.245993	0.0720741	0.489482	0.105983	0.124821	0.492563	0.603657	0.387083	0.941036	0.243801	0.167678	0.579635
Q9Y297	BTRC	0.98169	0.951311	0.0208757	0.0478498	0.649663	0.694073	0.716901	0.719212	0.131677	0.388993	0.776447	0.383571	0.671075	0.23112	0.640455	0.910146	0.656843	0.286864	0.209459	0.582851	0.816618	0.493617	0.921457	0.216745	0.824407	0.0510785	0.345655	0.29778	0.404005
Q75N90	FBN3	0.981495	0.212463	0.462016	0.471251	0.147384	0.772281	0.07101	0.977866	0.916173	0.867323	0.965354	0.723337	0.836354	0.700834	0.514262	0.207615	0.938841	0.363144	0.196141	0.802918	0.506066	0.104811	0.195295	0.646905	0.256841	0.600687	0.557377	0.0209981	0.767475
P0CG38	POTEI	0.999509	0.636933	0.397066	0.505127	0.729818	0.873614	0.211727	0.570711	0.211995	0.328073	0.816509	0.491479	0.793934	0.420151	0.757243	0.974763	0.436063	0.0571771	0.263753	0.237186	0.117021	0.195515	0.0707806	0.809753	0.598165	0.445413	0.198548	0.156742	0.309467
Q9H410	DSN1	0.997317	0.614488	0.801813	0.731625	0.129276	0.921518	0.440823	0.256862	0.813095	0.747819	0.138821	0.785852	0.772966	0.00020889	0.772767	0.437857	0.762077	0.708318	0.560413	0.636369	0.243389	0.418718	0.950009	0.376384	0.561646	0.180666	0.935149	0.140678	0.032268
Q9UK22	FBXO2	0.969136	0.786859	0.518566	0.90918	0.338101	0.463331	0.820139	0.408748	0.347196	0.248211	0.722459	0.0516225	0.379177	0.490007	0.278218	0.224884	0.771558	0.638124	0.0321028	0.30783	0.319	0.697712	0.0453285	0.224189	0.114561	0.591349	0.601281	0.901196	0.707159
Q9H6D7	HAUS4	0.986804	0.653377	0.534576	0.274452	0.228188	0.983561	0.954611	0.801866	0.737747	0.183706	0.159316	0.939271	0.74644	0.0447067	0.0365947	0.397703	0.274653	0.352625	0.396104	0.837559	0.667074	0.568536	0.698202	0.605817	0.876322	0.32871	0.275435	0.37877	0.110373
P07766	CD3E	0.974385	0.51763	0.576442	0.163015	0.034718	0.956519	0.382457	0.378589	0.583288	0.613052	0.389664	0.307755	0.193974	0.560609	0.871585	0.925099	0.702924	0.638836	0.410429	0.381537	0.910297	0.660238	0.46455	0.123239	0.758203	0.608682	0.244671	0.0396289	0.0517193
Q8WVR3	TRAPPC14	0.970333	0.347131	0.949184	0.326197	0.66103	0.397033	0.312571	0.147907	0.0439204	0.809172	0.566196	0.590927	0.206837	0.673557	0.600519	0.779388	0.431858	0.613189	0.257051	0.334494	0.920093	0.601213	0.888608	0.617369	0.201041	0.0675127	0.633685	0.969689	0.0141804
Q5T764	IFIT1B	0.990931	0.1522	0.553891	0.117324	0.598131	0.700598	0.887656	0.715103	0.661866	0.505314	0.781852	0.495341	0.382557	0.705638	0.0805399	0.0620844	0.170567	0.379516	0.0369448	0.51672	0.368994	0.19501	0.475561	0.489917	0.975652	0.154905	0.42304	0.517857	0.552166
Q9H4H8	FAM83D	0.926697	0.557412	0.583184	0.757849	0.145879	0.757744	0.0403861	0.784816	0.356593	0.725878	0.425577	0.525474	0.512091	0.102793	0.0504686	0.773044	0.645113	0.0151185	0.839052	0.376232	0.355598	0.695199	0.363942	0.221299	0.704903	0.564482	0.164695	0.663658	0.879929
P15121	AKR1B1	0.911536	0.553913	0.0344081	0.645125	0.545496	0.89769	0.0382158	0.0350426	0.806236	0.615432	0.487006	0.624588	0.512831	0.350907	0.702039	0.358341	0.805194	0.859642	0.822522	0.716498	0.795154	0.65543	0.611854	0.300795	0.61997	0.0560325	0.883896	0.117216	0.165368
P54762	EPHB1	0.937879	0.0917734	0.437355	0.765789	0.874055	0.319027	0.47306	0.180165	0.200281	0.123795	0.677708	0.635748	0.836329	0.238987	0.933166	0.314183	0.0968686	0.732544	0.224348	0.426467	0.32415	0.176786	0.244105	0.73867	0.79251	0.454399	0.483318	0.232678	0.205978
Q9Y237	PIN4	7953420000000	6285190000000	5413360000000	3955470000000	3967950000000	4654400000000	6881340000000	2247860000000	2576740000000	3541390000000	7227640000000	7116150000000	6084340000000	5443370000000	258739000000	701522000000	2512010000000	749842000000	6638770000000	1519790000000	1790930000000	7427290000000	3785490000000	1443440000000	6531170000000	2270600000000	1678290000000	7503010000000	3093790000000
Q9BVA1	TUBB2B	0.999455	0.605353	0.0337094	0.0556004	0.533296	0.486204	0.572002	0.79046	0.666089	0.0555104	0.431697	0.299535	0.0685637	0.0857467	0.367743	0.342441	0.984728	0.576886	0.866556	0.956901	0.391032	0.311595	0.66635	0.731898	0.851638	0.429815	0.657369	0.784572	0.663515
Q5S007	LRRK2	0.993775	0.275056	0.27068	0.523312	0.218142	0.0169673	0.494068	0.487558	0.229929	0.0814136	0.259401	0.82354	0.158639	0.422217	0.465805	0.136852	0.139861	0.612187	0.557607	0.356341	0.982512	0.418258	0.921386	0.265758	0.471318	0.588276	0.368767	0.691928	0.344183
O75503	CLN5	0.927715	0.00690416	0.346599	0.481869	0.141814	0.151699	0.689061	0.619683	0.48232	0.0641946	0.449505	0.868953	0.209346	0.764997	0.399454	0.757893	0.292953	0.242834	0.544847	0.510663	0.831439	0.525114	0.16748	0.620291	0.239999	0.742304	0.541255	0.102447	0.429092
O75167	PHACTR2	0.966172	0.671299	0.453295	0.472448	0.721323	0.912929	0.0205702	0.181275	0.18031	0.347958	0.684482	0.654652	0.557615	0.235291	0.842084	0.777809	0.0963976	0.0450734	0.624744	0.550958	0.0378198	0.392837	0.909792	0.752335	0.429158	0.803909	0.385517	0.688516	0.47983
P30456	P30456	0.991434	0.602899	0.26958	0.336957	0.0934381	0.770291	0.63935	0.106964	0.302724	0.064847	0.652691	0.86152	0.833156	0.323451	0.984626	0.607653	0.0507068	0.124696	0.621674	0.79399	0.129512	0.490897	0.700508	0.842992	0.644152	0.378934	0.674492	0.716094	0.928075
Q14849	STARD3	0.937144	0.0416606	0.553093	0.0866797	0.174988	0.698279	0.201071	0.862978	0.926642	0.657514	0.403448	0.648488	0.351254	0.925433	0.591757	0.26346	0.16733	0.280098	0.652516	0.847635	0.753737	0.706478	0.641592	0.116337	0.586792	0.357013	0.499047	0.810126	0.0644768
Q6UW02	CYP20A1	0.998329	0.928122	0.366121	0.106975	0.0843911	0.147648	0.841923	0.198223	0.590487	0.954715	0.810497	0.301954	0.889175	0.376223	0.356151	0.234471	0.595796	0.741808	0.315608	0.184954	0.940773	0.679684	0.53043	0.49073	0.446531	0.0969723	0.175989	0.423627	0.563952
Q8IVT2	MISP	0.744303	0.328871	0.309235	0.243972	0.501327	0.00216166	0.238713	0.615522	0.213089	0.693676	0.0650181	0.406595	0.306934	0.494834	0.622844	0.475056	0.706559	0.616498	0.699418	0.405637	0.191126	0.294298	0.407661	0.0256927	0.246986	0.550557	0.601635	0.189831	0.109778
O00743	PPP6C	0.992436	0.154321	0.454101	0.00958613	0.793176	0.0688611	0.892025	0.595796	0.149714	0.827221	0.391104	0.398057	0.686067	0.554865	0.312008	0.497939	0.918998	0.23806	0.723502	0.980604	0.788293	0.450086	0.591261	0.0331582	0.761863	0.954793	0.484318	0.310108	0.53305
P05549	TFAP2A	0.978306	0.426642	0.0389819	0.2093	0.958175	0.133386	0.398973	0.244845	0.740428	0.902503	0.137464	0.537829	0.535908	0.808914	0.255049	0.521388	0.901338	0.48961	0.755221	0.856864	0.694379	0.41064	0.421497	0.335438	0.00802858	0.906028	0.682559	0.272419	0.708824
O14638	ENPP3	0.99879	0.608887	0.404413	0.296053	0.465623	0.905658	0.909769	0.155089	0.306847	0.0733316	0.142284	0.76979	0.634877	0.899696	0.785764	0.710599	0.889325	0.387007	0.420644	0.077669	0.872894	0.900326	0.669111	0.800501	0.196065	0.425426	0.0182162	0.493103	0.7297
Q9NUU6	OTULINL	289834000000000	71636900000000	80367600000000	116874000000000	139735000000000	10816900000000	207059000000000	212689000000000	230794000000000	223328000000000	154350000000000	107111000000000	224723000000000	239829000000000	92055800000000	39047800000000	189600000000000	44068000000000	168829000000000	275855000000000	60798600000000	268272000000000	5752890000000	158488000000000	176441000000000	106895000000000	161417000000000	52903300000000	104637000000000
P10319	P10319	0.940713	0.575257	0.467447	0.642692	0.0268518	0.291975	0.77804	0.546427	0.545302	0.389808	0.108212	0.193282	0.581035	0.59379	0.618438	0.861153	0.472201	0.289434	0.216903	0.75844	0.346105	0.00574611	0.864224	0.922986	0.464828	0.756786	0.180872	0.354093	0.224675
Q15054	POLD3	0.905698	0.0603356	0.888633	0.562613	0.0274915	0.472865	0.134303	0.739999	0.337202	0.0185366	0.518954	0.424488	0.391822	0.747605	0.718158	0.651468	0.461702	0.560763	0.443605	0.824434	0.892892	0.522871	0.102692	0.854354	0.226166	0.80109	0.862689	0.765219	0.406251
P0DPK4	NOTCH2NLC	0.950002	0.326136	0.436058	0.720736	0.399382	0.855213	0.331185	0.701265	0.683374	0.787799	0.831598	0.735931	0.0224111	0.358044	0.398071	0.780115	0.0679846	0.824687	0.567551	0.78709	0.856887	0.695788	0.00739638	0.652263	0.594401	0.0854592	0.389405	0.186659	0.331339
Q9NQW6	ANLN	1.00872	0.356146	0.379445	0.968559	0.516294	0.152641	0.0743911	0.611085	0.773392	0.490278	0.523793	0.276294	0.54332	0.172992	0.0351002	0.411035	0.0959604	0.652774	0.425383	0.239853	0.38147	0.419139	0.882764	0.978473	0.573465	0.88306	0.966001	0.893838	0.38787
P78381	SLC35A2	0.97979	0.479631	0.123509	0.408452	0.198636	0.865335	0.636201	0.349659	0.226385	0.702897	0.899476	0.75984	0.153802	0.717095	0.682382	0.22239	0.129312	0.950629	0.736916	0.424	0.072624	0.974574	0.825219	0.547334	0.0733188	0.421674	0.422892	0.891219	0.752009
O15431	SLC31A1	0.999742	0.121803	0.773256	0.453622	0.622328	0.532955	0.682374	0.462169	0.0530974	0.886107	0.488192	0.634399	0.575464	0.544779	0.232654	0.518095	0.28073	0.995405	0.364172	0.763596	0.360394	0.283094	0.0648765	0.468719	0.279253	0.827112	0.911709	0.161577	0.0765749
O14639	ABLIM1	0.963598	0.294032	0.708132	0.501819	0.150655	0.226741	0.0212602	0.7698	0.884773	0.516091	0.293019	0.813203	0.584188	0.875969	0.280716	0.422036	0.478424	0.39378	0.427002	0.626544	0.079902	0.741459	0.128287	0.267867	0.401205	0.161525	0.703247	0.233143	0.39107
O43255	SIAH2	0.979024	0.375177	0.493435	0.562787	0.687639	0.916865	0.787995	0.131331	0.106174	0.763994	0.871471	0.726152	0.688544	0.821684	0.516169	0.767087	0.573295	0.674898	0.644181	0.928513	0.305057	0.628051	0.136344	0.413689	0.00370994	0.115697	0.0379813	0.738244	0.77068
P57076	CFAP298	0.983425	0.513482	0.724812	0.0322125	0.610003	0.347901	0.129009	0.715332	0.0331294	0.208655	0.441817	0.931022	0.6512	0.518287	0.864053	0.7928	0.224367	0.586157	0.605602	0.817166	0.956797	0.763406	0.0354286	0.563572	0.558854	0.228516	0.87435	0.455017	0.446385
Q7L7L0	H2AW	0.991447	0.186785	0.953902	0.89317	0.197697	0.14418	0.729435	0.479805	0.718852	0.930872	0.406531	0.58531	0.842856	0.223996	0.743167	0.0842179	0.147048	0.555439	0.809682	0.0953766	0.689091	0.335912	0.583617	0.312079	0.152354	0.86044	0.490878	0.97775	0.48403
P0CAP1	MYZAP	0.981578	0.892887	0.932991	0.59977	0.0182157	0.335827	0.636844	0.318062	0.38872	0.591164	0.378943	0.635856	0.904351	0.515218	0.664662	0.0466631	0.255446	0.0121162	0.57733	0.933043	0.0670064	0.564359	0.686819	0.718272	0.41057	0.716064	0.680322	0.462628	0.509705
O75387	SLC43A1	0.98361	0.685087	0.797914	0.958716	0.34825	0.553895	0.171861	0.41785	0.903958	0.840771	0.675719	0.582911	0.282415	0.336801	0.699564	0.381803	0.896052	0.535535	0.40285	0.191824	0.152624	0.45542	0.724226	0.148596	0.0560854	0.727442	0.00235924	0.534236	0.79891
Q9BVK2	ALG8	0.999962	0.747733	0.692627	0.787589	0.198696	0.662609	0.991277	0.20817	0.900122	0.250129	0.487335	0.146082	0.393162	0.0967561	0.625341	0.784561	0.24875	0.219147	0.652993	0.428571	0.364641	0.687019	0.979869	0.0921864	0.653618	0.568205	0.903169	0.226256	0.178858
P12882	MYH1	0.985593	0.243215	0.494819	0.973536	0.138991	0.277907	0.131478	0.514405	0.288086	0.649953	0.0270541	0.709306	0.631566	0.908972	0.960148	0.278846	0.610358	0.798339	0.252878	0.737402	0.165758	0.887283	0.654405	0.342888	0.339899	0.242157	0.448126	0.732813	0.982805
Q9UDT6	CLIP2	0.99903	0.831491	0.388695	0.955367	0.332139	0.596837	0.208613	0.159359	0.598377	0.672461	0.821933	0.583693	0.928299	0.172845	0.707134	0.537122	0.543904	0.627322	0.36468	0.395553	0.85295	0.9116	0.0759451	0.875267	0.364122	0.19076	0.151181	0.839454	0.0311205
P05067	APP	3.44707	3.33601	2.52863	2.59065	2.82004	2.38127	2.07004	2.33487	1.04686	1.12717	1.45962	0.635792	0.759532	1.01067	0.748305	0.579037	0.501003	2.36813	1.51193	0.705204	1.01399	1.51745	2.14117	1.42549	1.01349	1.52719	0.972441	0.385907	0.232999
Q8IY47	KBTBD2	0.940099	0.0220347	0.422597	0.469481	0.439725	0.165093	0.819045	0.610578	0.216145	0.405979	0.88115	0.467804	0.235494	0.885101	0.239674	0.0350969	0.656517	0.516421	0.702906	0.844826	0.453558	0.330118	0.846355	0.578784	0.147292	0.840133	0.233442	0.904414	0.623988
Q9Y3D3	MRPS16	0.989585	0.81931	0.532535	0.378624	0.858701	0.627506	0.037419	0.467077	0.13639	0.941748	0.542295	0.580337	0.810346	0.0264	0.660345	0.765633	0.854816	0.907394	0.163974	0.933936	0.757589	0.463149	0.778332	0.820249	0.182688	0.379501	0.211682	0.630355	0.150881
P43355	MAGEA1	0.991089	0.252689	0.46859	0.644049	0.732005	0.181409	0.976854	0.546464	0.236699	0.794285	0.433426	0.0762014	0.16763	0.160034	0.356273	0.0947188	0.985969	0.24495	0.57508	0.918051	0.215455	0.450115	0.585004	0.349003	0.858869	0.343686	0.668132	0.47403	0.789187
Q9H840	GEMIN7	0.993945	0.295728	0.919081	0.534016	0.207753	0.144555	0.873033	0.663544	0.737326	0.394515	0.983592	0.968194	0.225464	0.144283	0.138735	0.934277	0.459318	0.591822	0.42511	0.321592	0.980594	0.577776	0.25246	0.870952	0.315363	0.604201	0.953459	0.0706663	0.908564
P26010	ITGB7	0.964776	0.0599975	0.187148	0.697957	0.303688	0.602282	0.118757	0.244532	0.661678	0.935981	0.840099	0.280201	0.889459	0.5314	0.866249	0.158195	0.704973	0.399664	0.314778	0.867709	0.778904	0.542163	0.711679	0.827704	0.953386	0.0518239	0.577158	0.23082	0.510698
Q9Y5L3	ENTPD2	0.948286	0.000871801	0.71079	0.399022	0.250256	0.909067	0.612697	0.674239	0.447105	0.0775263	0.47177	0.28917	0.330993	0.344988	0.254484	0.20536	0.472129	0.356851	0.445244	0.877327	0.447917	0.865871	0.015627	0.813553	0.532466	0.616171	0.473092	0.662948	0.476157
Q9ULK5	VANGL2	0.975443	0.871892	0.784172	0.269112	0.660794	0.866756	0.456185	0.127631	0.515704	0.148829	0.943177	0.287896	0.203391	0.313007	0.843011	0.749618	0.16332	0.337335	0.724983	0.603897	0.158306	0.785989	0.645045	0.821135	0.130209	0.328121	0.20513	0.342803	0.964865
O14508	SOCS2	0.974738	0.0944368	0.17879	0.890475	0.940799	0.612779	0.252654	0.246877	0.584568	0.292593	0.917471	0.787977	0.92048	0.274582	0.15561	0.842912	0.345736	0.511358	0.702104	0.439536	0.468155	0.474436	0.39624	0.46031	0.238594	0.113075	0.269318	0.222527	0.908857
Q9UIA0	CYTH4	0.998935	0.40557	0.454114	0.294287	0.259459	0.81734	0.246552	0.21097	0.246828	0.493923	0.172216	0.465243	0.597346	0.613072	0.818146	0.9497	0.282344	0.889116	0.147264	0.591032	0.328265	0.115525	0.136415	0.619232	0.221641	0.427203	0.128449	0.594707	0.723236
P02778	CXCL10	0.888745	0.0836342	0.315432	0.536729	0.53426	0.605114	0.273525	0.313721	0.084082	0.392053	0.528374	0.454022	0.115433	0.138892	0.673377	0.430163	0.583029	0.428718	0.0859679	0.106023	0.863819	0.45636	0.723691	0.701639	0.490014	0.797952	0.626066	0.841829	0.20742
P57721	PCBP3	0.9946	0.739909	0.709887	0.854191	0.974518	0.290259	0.216002	0.831402	0.92001	0.415641	0.307957	0.431954	0.103819	0.299498	0.548208	0.616597	0.734779	0.899611	0.572482	0.126535	0.98026	0.0683395	0.710624	0.44546	0.592232	0.774992	0.0740968	0.962387	0.21938
Q9H3H3	C11orf68	0.983416	0.226341	0.908731	0.932108	0.366254	0.0998355	0.320635	0.469941	0.759434	0.845352	0.658617	0.285615	0.56827	0.804574	0.39861	0.592096	0.917217	0.754896	0.607241	0.0176472	0.846797	0.0292098	0.263341	0.220868	0.340966	0.604768	0.618531	0.579064	0.408467
Q9C0D5	TANC1	0.917343	0.387281	0.64589	0.136717	0.723103	0.172797	0.598648	0.532821	0.15136	0.578698	0.364614	0.874925	0.871802	0.492799	0.245128	0.734264	0.483643	0.436181	0.0853433	0.511289	0.393957	0.281934	0.696289	0.707157	0.252794	0.785376	0.365947	0.160557	0.026705
P08138	NGFR	0.977569	0.237065	0.292241	0.701275	0.740899	0.416907	0.891482	0.242047	0.155838	0.672189	0.47759	0.292435	0.522726	0.10165	0.102706	0.201003	0.772449	0.536256	0.966846	0.146418	0.861848	0.534924	0.793188	0.399357	0.823044	0.384951	0.663234	0.502789	0.138999
Q8IUC4	RHPN2	0.983481	0.567358	0.0391611	0.62603	0.127193	0.12579	0.80034	0.768099	0.275599	0.876856	0.955076	0.684253	0.398416	0.405155	0.265434	0.909588	0.365854	0.313063	0.768493	0.508955	0.568038	0.442858	0.876084	0.392819	0.358055	0.960395	0.177871	0.131325	0.738874
O95801	TTC4	0.991784	0.922953	0.740833	0.254324	0.253112	0.964288	0.672935	0.363457	0.840248	0.882301	0.197872	0.54268	0.288282	0.250431	0.687388	0.741054	0.898993	0.399694	0.184082	0.446401	0.516919	0.801744	0.824234	0.0395277	0.354981	0.814756	0.0120922	0.655278	0.84437
Q9BRU9	UTP23	0.937808	0.269037	0.496899	0.200249	0.843992	0.498891	0.503389	0.345706	0.236981	0.837815	0.435686	0.416306	0.289624	0.531819	0.599559	0.737919	0.821904	0.804699	0.679148	0.249584	0.301771	0.38702	0.741673	0.270295	0.0831015	0.163228	0.0138081	0.209137	0.377604
Q96F15	GIMAP5	0.877846	0.343889	0.692878	0.41731	0.583917	0.850309	0.276529	0.267383	0.154638	0.0794283	0.591761	0.237884	0.227153	0.105711	0.377239	0.545599	0.279194	0.738488	0.164331	0.429751	0.222061	0.449658	0.393128	0.151089	0.604135	0.724903	0.41534	0.491362	0.0843955
Q8N668	COMMD1	0.987146	0.272464	0.250332	0.0332955	0.425306	0.694249	0.294757	0.699839	0.753227	0.730456	0.937363	0.879602	0.794945	0.648639	0.924639	0.485322	0.0599475	0.867286	0.385172	0.165178	0.849973	0.968549	0.785008	0.955038	0.676527	0.237968	0.304614	0.2747	0.264176
Q9H4B7	TUBB1	0.970427	0.619415	0.107898	0.11112	0.723965	0.390708	0.181034	0.454936	0.718664	0.173041	0.574932	0.930452	0.477249	0.243067	0.350712	0.919848	0.0859833	0.865953	0.154705	0.31487	0.250375	0.828424	0.63636	0.883759	0.681392	0.628425	0.378997	0.555895	0.67895
A0A075B6K2	IGLV3-12	0.956949	0.827322	0.237571	0.752321	0.714189	0.948155	0.195103	0.323392	0.044491	0.562628	0.620954	0.132122	0.666248	0.158854	0.28751	0.242432	0.332423	0.745904	0.683388	0.644911	0.910991	0.75958	0.156704	0.441928	0.669515	0.314327	0.202151	0.745126	0.754006
P28702	RXRB	0.967267	0.0340693	0.771924	0.828936	0.710547	0.512824	0.285546	0.774558	0.563159	0.797615	0.155898	0.489897	0.357098	0.653771	0.704401	0.63593	0.40711	0.0942322	0.849105	0.123873	0.198903	0.426205	0.454651	0.50788	0.142417	0.54478	0.785813	0.161047	0.475474
Q17RY6	LY6K	0.994346	0.326802	0.139572	0.794633	0.498093	0.875213	0.504952	0.193105	0.319225	0.8978	0.921718	0.514758	0.978674	0.852804	0.380907	0.215425	0.119505	0.687337	0.45924	0.580513	0.291925	0.894413	0.664745	0.503638	0.211468	0.567527	0.377869	0.425175	0.0175979
O60831	PRAF2	0.972853	0.876655	0.295093	0.886904	0.392608	0.169945	0.0597668	0.0670658	0.80529	0.69211	0.594464	0.672434	0.89614	0.939584	0.231786	0.754478	0.335162	0.727588	0.889025	0.114965	0.195573	0.797795	0.335023	0.590261	0.791368	0.704833	0.814022	0.762285	0.253379
Q6UVY6	MOXD1	6699890000000000	3679290000000000	2180550000000000	1131080000000000	3139890000000000	1912560000000000	2711330000000000	4065920000000000	594926000000000	2850230000000000	443733000000000	1512690000000000	5530610000000000	5796050000000000	2508810000000000	3818030000000000	1960940000000000	1412200000000000	2004140000000000	3216560000000000	2953430000000000	6461150000000000	3814140000000000	1428990000000000	6622980000000000	6296900000000000	2195800000000000	4101620000000000	2548390000000000
A0A0B4J2D9	IGKV1D-13	0.995138	0.0982978	0.76713	0.763181	0.189223	0.327635	0.799335	0.637633	0.873211	0.709871	0.180872	0.292907	0.186896	0.462798	0.767365	0.656886	0.253105	0.164857	0.38388	0.482626	0.112651	0.127402	0.651707	0.811192	0.743978	0.533393	0.540476	0.309888	0.816285
Q9H201	EPN3	0.983359	0.371093	0.729327	0.464812	0.880669	0.216243	0.366823	0.0331533	0.923152	0.131065	0.507164	0.391514	0.880241	0.809359	0.631016	0.0850687	0.739788	0.888657	0.611904	0.286156	0.688317	0.440823	0.975536	0.685501	0.109397	0.729988	0.800508	0.248494	0.893662
Q53S08	RAB6D	4.23226	3.20505	2.49625	3.36644	2.57316	1.8806	2.3467	2.16721	0.745739	1.26872	1.28391	0.426041	1.01303	1.63796	0.620919	0.540469	0.809649	2.45341	0.762832	0.95953	0.983404	1.73091	1.81777	1.63719	1.98241	1.44204	0.683362	1.09202	0.708247
Q96H55	MYO19	0.87603	0.756596	0.36397	0.0235193	0.0388293	0.388264	0.61656	0.553224	0.603132	0.702475	0.198153	0.257367	0.806931	0.510154	0.71924	0.239644	0.180709	0.656344	0.301625	0.344651	0.803074	0.633479	0.216791	0.379877	0.656574	0.726653	0.128585	0.660549	0.712166
Q9Y646	CPQ	0.915468	0.168996	0.521689	0.643088	0.420432	0.902391	0.334622	0.717075	0.240095	0.216495	0.192187	0.47384	0.750469	0.352002	0.6963	0.211194	0.813033	0.694163	0.388399	0.558816	0.0258938	0.315251	0.183156	0.501797	0.39932	0.803572	0.616638	0.8745	0.105629
Q75T13	PGAP1	0.966231	0.143315	0.520909	0.665935	0.948451	0.237828	0.72895	0.808515	0.0556076	0.162834	0.591837	0.878552	0.492465	0.699463	0.521792	0.703167	0.880341	0.629234	0.831173	0.283842	0.263551	0.635667	0.0638772	0.334966	0.479563	0.347839	0.136645	0.419022	0.603912
Q86SK9	SCD5	0.934378	0.291943	0.0414255	0.626485	0.821887	0.912401	0.739764	0.857894	0.489059	0.697301	0.19097	0.586289	0.423396	0.223383	0.00336178	0.379683	0.335157	0.663018	0.498837	0.550009	0.424036	0.501984	0.174385	0.747942	0.782786	0.189357	0.929742	0.717635	0.833984
P55789	GFER	0.9842	0.75038	0.410299	0.415309	0.679852	0.607265	0.361326	0.459373	0.598556	0.773152	0.641547	0.346629	0.0911477	0.581794	0.100596	0.767515	0.763854	0.458671	0.20591	0.512466	0.0361048	0.0741499	0.979948	0.754612	0.359046	0.356614	0.945871	0.903163	0.864878
Q8IYT2	CMTR2	0.96228	0.847411	0.742349	0.0852358	0.702136	0.609516	0.358314	0.331035	0.091329	0.905473	0.593666	0.551348	0.549119	0.388621	0.190384	0.822928	0.832401	0.438546	0.429297	0.339199	0.185538	0.154538	0.178187	0.23458	0.388695	0.218828	0.786113	0.506089	0.682522
O95070	YIF1A	0.873396	0.30595	0.184982	0.789725	0.535241	0.597969	0.625647	0.578572	0.400413	0.299571	0.0692103	0.418525	0.264315	0.202928	0.222668	0.650736	0.503436	0.734348	0.39931	0.311785	0.370388	0.223113	0.792316	0.18951	0.58201	0.0457075	0.823522	0.312582	0.1951
P17927	CR1	0.987357	0.100144	0.453104	0.905408	0.655137	0.42089	0.200164	0.379789	0.858077	0.765767	0.910273	0.00270548	0.5364	0.605289	0.237475	0.912945	0.488633	0.920583	0.258661	0.659756	0.973966	0.375232	0.422612	0.294963	0.979766	0.347901	0.259548	0.828108	0.516416
O00425	IGF2BP3	3.7674	1.20456	2.37093	1.92076	1.67355	1.58281	1.34527	1.76264	0.718723	0.889765	1.17197	1.14496	1.38715	0.49294	0.767097	2.48284	0.59186	1.38842	0.689282	0.839135	0.402205	0.657112	1.66253	0.984196	1.14963	0.690952	0.731548	0.993864	0.292105
Q9ULK4	MED23	0.987258	0.122428	0.27164	0.571616	0.574256	0.790645	0.763142	0.832283	0.00964102	0.412249	0.261766	0.516856	0.313612	0.21992	0.67057	0.15446	0.415353	0.853864	0.536027	0.240107	0.77582	0.402757	0.890664	0.55654	0.308125	0.793676	0.647715	0.279503	0.92157
Q86TB9	PATL1	0.986513	0.773228	0.85221	0.829704	0.0546634	0.30187	0.96622	0.722237	0.156763	0.637936	0.658083	0.401129	0.703333	0.636109	0.775179	0.942738	0.773534	0.0104015	0.387811	0.738359	0.445455	0.103281	0.264466	0.578612	0.630757	0.272431	0.934529	0.714543	0.796241
Q9BV23	ABHD6	0.961964	0.519033	0.658849	0.481149	0.852518	0.419344	0.437669	0.518822	0.423401	0.550563	0.03286	0.540808	0.908931	0.740441	0.775665	0.117816	0.491775	0.404858	0.837201	0.170068	0.234366	0.870139	0.0490719	0.250856	0.304221	0.305598	0.422683	0.694971	0.639832
Q86WX3	RPS19BP1	2104.59	1358.22	397.077	492.885	1622.98	1633.05	1962.79	1095.21	1687.6	1388.61	1654.26	2034.88	313.578	1511.44	517.357	1032.86	1605.34	2088.25	1808.13	1210.82	650.899	291.767	144.46	153.423	1089.7	2050.35	1354.63	1386.62	1512.49
Q9BRK4	LZTS2	0.949325	0.744232	0.854286	0.409474	0.75993	0.299256	0.941769	0.336973	0.840963	0.141726	0.735895	0.210639	0.454113	0.941552	0.157817	0.637332	0.594727	0.377065	0.717279	0.72231	0.906962	0.0865082	0.5871	0.703465	0.94067	0.534688	0.282796	0.0289874	0.824457
Q9UP52	TFR2	0.989679	0.0453187	0.893376	0.827642	0.761775	0.519573	0.688467	0.666139	0.799598	0.510851	0.149191	0.497231	0.533954	0.634277	0.877734	0.693134	0.0926358	0.916074	0.894743	0.0702309	0.524202	0.3706	0.66265	0.142598	0.932896	0.875392	0.674761	0.210316	0.638921
P56556	NDUFA6	0.905931	0.344659	0.698608	0.0923986	0.450451	0.208183	0.196752	0.602641	0.163168	0.370781	0.506476	0.768369	0.571344	0.263039	0.510017	0.595385	0.0392074	0.334606	0.247913	0.231729	0.350578	0.725723	0.449745	0.445798	0.373946	0.399598	0.344941	0.312112	0.0795118
Q9NTW7	ZFP64	0.992654	0.577179	0.367714	0.683532	0.594403	0.320597	0.66688	0.354885	0.701445	0.181681	0.720247	0.875698	0.062319	0.734898	0.561214	0.642111	0.332774	0.74297	0.756653	0.816209	0.775759	0.59598	0.330883	0.00449923	0.0935319	0.933144	0.356794	0.320526	0.765205
Q96P11	NSUN5	0.974959	0.270576	0.63514	0.479865	0.734847	0.308981	0.759942	0.332738	0.802825	0.631672	0.692848	0.917586	0.247183	0.0672447	0.261846	0.56243	0.60681	0.870072	0.637895	0.587857	0.400939	0.0802158	0.405809	0.580896	0.643558	0.0971254	0.894555	0.132858	0.441274
P40394	ADH7	0.979935	0.969131	0.257448	0.455151	0.243008	0.940004	0.583096	0.185438	0.771771	0.454989	0.305184	0.772823	0.275148	0.596613	0.00527023	0.716242	0.153781	0.600495	0.346887	0.838915	0.715981	0.879417	0.954046	0.572718	0.868062	0.953811	0.569591	0.196582	0.644592
Q9NZI8	IGF2BP1	3.43352	1.80318	0.753687	1.56847	1.76742	0.834023	1.5421	0.553529	0.649229	1.057	1.26231	0.545218	0.352835	0.86104	1.15024	0.549074	0.518869	1.40988	1.07939	0.564388	1.05871	0.946212	1.62718	0.556698	1.10697	0.987867	0.286149	1.19364	0.648267
Q02083	NAAA	1.10426	0.745962	0.124185	0.756948	0.614633	0.950775	0.467534	0.525292	0.801449	0.402059	0.866031	0.960597	0.981912	0.780712	0.393826	1.09102	0.892211	0.366669	0.689496	1.04874	0.559955	0.104525	0.0367206	0.278107	0.291916	0.63824	0.908068	0.25348	0.513203
Q6XUX3	DSTYK	0.935437	0.474249	0.525439	0.369913	0.300368	0.263333	0.560144	0.122727	0.792053	0.46448	0.615077	0.412807	0.0703448	0.412442	0.0358627	0.268624	0.571909	0.501189	0.694511	0.842157	0.90066	0.713411	0.44922	0.770936	0.61233	0.917273	0.653812	0.172943	0.268627
O75691	UTP20	0.970598	0.269761	0.563257	0.524201	0.61926	0.43312	0.275128	0.768614	0.926314	0.697338	0.119449	0.635134	0.360693	0.88725	0.0140426	0.720218	0.528725	0.391439	0.620606	0.901897	0.367556	0.867068	0.0482304	0.414174	0.824865	0.897543	0.5602	0.797986	0.303265
Q14318	FKBP8	0.948347	0.660553	0.147132	0.274076	0.794819	0.827549	0.60616	0.129686	0.531195	0.544112	0.453032	0.696234	0.522577	0.935461	0.746268	0.268127	0.0408552	0.603221	0.689792	0.30628	0.0403087	0.643803	0.78043	0.550343	0.260613	0.457131	0.637003	0.357556	0.563146
P09923	ALPI	0.988898	0.926465	0.621117	0.194629	0.884247	0.192844	0.781732	0.708113	0.288646	0.532196	0.435894	0.959018	0.96807	0.8411	0.0807941	0.412482	0.828644	0.508285	0.163081	0.864793	0.225601	0.957253	0.81745	0.569391	0.964707	0.965113	0.382077	0.370748	0.25404
Q9NP78	ABCB9	0.996075	0.0264169	0.558047	0.444791	0.486496	0.460614	0.595097	0.0771799	0.816562	0.915186	0.423166	0.802421	0.230027	0.705533	0.949923	0.564411	0.970675	0.241861	0.380978	0.683826	0.825075	0.329236	0.87533	0.805349	0.627762	0.99378	0.979461	0.600646	0.15557
Q13395	TARBP1	0.983334	0.46254	0.928876	0.399373	0.857777	0.493927	0.572416	0.784935	0.763168	0.205317	0.969546	0.0960393	0.824197	0.622667	0.894108	0.795538	0.845139	0.202506	0.0904129	0.316238	0.575206	0.233677	0.860676	0.74656	0.356939	0.948758	0.174877	0.874639	0.893096
Q9Y4C5	CHST2	0.982604	0.677356	0.188718	0.866127	0.375367	0.651365	0.783836	0.668784	0.892833	0.502423	0.571561	0.606942	0.663907	0.169629	0.641402	0.945089	0.0890632	0.641876	0.768015	0.215625	0.212906	0.464665	0.178257	0.31951	0.480816	0.357312	0.921512	0.165165	0.716527
Q15750	TAB1	0.975818	0.360233	0.612198	0.434739	0.887591	0.545493	0.780922	0.603634	0.0436463	0.211553	0.906846	0.455607	0.711735	0.0874953	0.300772	0.243826	0.520073	0.689942	0.800118	0.831498	0.824536	0.550078	0.430502	0.65696	0.0763183	0.507298	0.297139	0.509604	0.584798
O15297	PPM1D	0.880234	0.522416	0.601315	0.821022	0.552984	0.23423	0.668623	0.473675	0.196992	0.314533	0.329518	0.736793	0.211013	0.658503	0.689409	0.432777	0.824541	0.372216	0.736183	0.536878	0.0641443	0.53937	0.129876	0.363437	0.0216654	0.676655	0.647118	0.690332	0.567892
O14986	PIP5K1B	0.97035	0.682593	0.315076	0.680944	0.307735	0.267351	0.381973	0.802162	0.949968	0.0355677	0.941674	0.812938	0.187572	0.496432	0.103789	0.62135	0.629787	0.937011	0.368695	0.200542	0.643024	0.520022	0.516548	0.620265	0.728314	0.835837	0.414921	0.849586	0.944045
Q9Y546	LRRC42	0.966676	0.634497	0.0123484	0.686264	0.360995	0.0917573	0.385996	0.313475	0.590106	0.890589	0.289531	0.547256	0.393618	0.421829	0.348062	0.499492	0.863272	0.736577	0.800778	0.843402	0.525288	0.359725	0.386487	0.95548	0.490288	0.325988	0.757712	0.392388	0.214896
Q9Y6A5	TACC3	0.99376	0.278641	0.921644	0.752091	0.254004	0.0562028	0.678537	0.85811	0.385942	0.984453	0.804252	0.60381	0.335269	0.91895	0.432073	0.945623	0.973401	0.756713	0.299962	0.560205	0.152582	0.549991	0.32584	0.293165	0.229888	0.922858	0.788386	0.885156	0.633086
Q7Z4I7	LIMS2	0.965117	0.735003	0.566364	0.35256	0.609755	0.211	0.768633	0.830538	0.732557	0.25216	0.945564	0.488811	0.441947	0.5098	0.242237	0.330666	0.435153	0.491169	0.266867	0.398341	0.385792	0.248099	0.683759	0.0680399	0.492063	0.786121	0.285801	0.0824585	0.677717
P11717	IGF2R	0.9982	0.00308115	0.698827	0.740105	0.976507	0.606056	0.785011	0.971984	0.554321	0.117463	0.575963	0.779957	0.359009	0.237681	0.957518	0.923044	0.494108	0.445789	0.552665	0.601508	0.762503	0.449162	0.40379	0.655567	0.545067	0.837286	0.0938778	0.454133	0.913853
Q96RQ3	MCCC1	0.924109	0.0922185	0.755345	0.251029	0.194716	0.60202	0.785607	0.787535	0.881636	0.62317	0.816236	0.256598	0.597524	0.901673	0.150888	0.771223	0.241462	0.432743	0.226122	0.750971	0.876112	0.582329	0.339054	0.595092	0.877684	0.742381	0.321165	0.256935	0.647238
Q6DD87	ZNF787	0.921998	0.646277	0.564362	0.820004	0.89213	0.585383	0.375269	0.529878	0.547599	0.577448	0.897056	0.320501	0.00822234	0.807709	0.270618	0.644315	0.297845	0.495739	0.106768	0.393232	0.836663	0.526771	0.396726	0.752592	0.564346	0.795231	0.135924	0.714775	0.347892
Q9NSI8	SAMSN1	0.987657	0.483709	0.481329	0.697114	0.560085	0.478494	0.382677	0.403347	0.364307	0.654961	0.556002	0.886132	0.14964	0.679815	0.241029	0.669746	0.156693	0.731791	0.65416	0.95365	0.429082	0.290052	0.175517	0.361137	0.74993	0.485695	0.168929	0.110738	0.606526
Q06055	ATP5MC2	0.944764	0.896344	0.937118	0.443839	0.916019	0.848112	0.89666	0.111497	0.65733	0.291091	0.62582	0.75419	0.88086	0.531906	0.772941	0.418637	0.0651686	0.10168	0.85471	0.369483	0.594031	0.395687	0.418945	0.751428	0.919927	0.271727	0.918041	0.72222	0.840689
Q9H1N7	SLC35B3	0.995692	0.509009	0.762631	0.687031	0.600769	0.292004	0.666962	0.092426	0.231781	0.806984	0.548324	0.615076	0.754844	0.652555	0.145728	0.773214	0.407826	0.873448	0.739896	0.888579	0.542386	0.359883	0.241782	0.5432	0.712039	0.141426	0.546197	0.156703	0.825161
Q7L590	MCM10	0.983635	0.294612	0.296498	0.655234	0.211751	0.614681	0.579826	0.893841	0.489916	0.935783	0.918942	0.740617	0.458623	0.475094	0.849375	0.283625	0.509473	0.291635	0.382055	0.785311	0.0876431	0.789829	0.820033	0.510574	0.954771	0.104174	0.574691	0.68392	0.362646
Q02338	BDH1	0.994499	0.448944	0.362344	0.564559	0.134141	0.176546	0.604245	0.593582	0.504188	0.112452	0.541161	0.543784	0.591308	0.199693	0.376384	0.350632	0.581989	0.749383	0.370553	0.505601	0.691096	0.712963	0.529005	0.795501	0.345195	0.0590744	0.474833	0.688594	0.826311
P05412	JUN	0.99711	0.48737	0.409806	0.734695	0.638064	0.329141	0.711938	0.192151	0.195947	0.144346	0.933212	0.756138	0.731453	0.423186	0.533435	0.57713	0.224191	0.689032	0.474476	0.932393	0.852225	0.292983	0.211439	0.990197	0.660843	0.414695	0.876215	0.447215	0.867828
A2RTY3	HEATR9	0.900103	0.489813	0.66483	0.545976	0.742978	0.785095	0.261055	0.266942	0.290585	0.385751	0.471158	0.37524	0.670077	0.82026	0.191031	0.27875	0.508073	0.16566	0.126634	0.61496	0.775384	0.266805	0.483536	0.607061	0.318951	0.721043	0.622138	0.37092	0.192912
Q8WWN8	ARAP3	0.996847	0.808534	0.531991	0.499126	0.57893	0.562533	0.774518	0.142079	0.936368	0.413171	0.740072	0.511082	0.944973	0.329762	0.520413	0.82389	0.0510051	0.689726	0.728721	0.356867	0.0776241	0.804298	0.678349	0.570146	0.593568	0.757522	0.455807	0.465311	0.369543
Q9UKY1	ZHX1	0.989287	0.752934	0.768031	0.584837	0.620821	0.220329	0.484294	0.122278	0.852512	0.690683	0.57245	0.377592	0.914094	0.756915	0.80377	0.812952	0.127705	0.761678	0.485374	0.714886	0.844863	0.216	0.954864	0.734215	0.0919842	0.75678	0.640275	0.444274	0.778853
Q86YC2	PALB2	0.987303	0.909325	0.831688	0.771421	0.266661	0.808308	0.634071	0.439775	0.334057	0.683506	0.0605846	0.321629	0.592559	0.243299	0.469308	0.883461	0.512593	0.205858	0.26278	0.975298	0.617054	0.578819	0.740804	0.348725	0.448455	0.791246	0.771732	0.603526	0.697621
Q9HAW9	UGT1A8	0.9934	0.900081	0.530655	0.893482	0.897139	0.901713	0.68024	0.375328	0.191787	0.527463	0.558912	0.366509	0.320264	0.79217	0.477523	0.980291	0.586448	0.580894	0.380002	0.0950227	0.352002	0.708841	0.456833	0.746127	0.2289	0.261336	0.677773	0.447332	0.855456
O15440	ABCC5	0.998712	0.947338	0.532771	0.878591	0.639681	0.818638	0.608009	0.839153	0.651346	0.729738	0.616923	0.74295	0.433525	0.048943	0.526137	0.3591	0.27133	0.190959	0.338983	0.564157	0.948571	0.894165	0.211508	0.366246	0.773458	0.786355	0.502924	0.357696	0.762401
Q7Z304	MAMDC2	0.991207	0.899927	0.886203	0.495608	0.553508	0.585495	0.490083	0.364588	0.578645	0.912253	0.762494	0.0739414	0.466817	0.384321	0.760104	0.926573	0.475277	0.669823	0.72228	0.27793	0.183912	0.330541	0.534556	0.307922	0.559896	0.746479	0.504892	0.867992	0.965877
Q9Y2G5	POFUT2	0.973939	0.63573	0.842516	0.676225	0.547422	0.624447	0.291313	0.368324	0.331327	0.95095	0.942586	0.789549	0.167159	0.821208	0.392582	0.731358	0.375541	0.971407	0.27537	0.601979	0.641007	0.92308	0.771118	0.45206	0.805501	0.269282	0.476473	0.365829	0.41353
Q8NEZ5	FBXO22	0.979653	0.888046	0.564206	0.416716	0.724896	0.474169	0.844729	0.188539	0.52642	0.625103	0.537977	0.580379	0.526892	0.141803	0.680393	0.72902	0.954195	0.517988	0.232779	0.521898	0.826101	0.720988	0.15611	0.447648	0.709143	0.598811	0.465713	0.582987	0.423623
Q9NSB4	KRT82	129.98	1056.17	0	117.485	0.873812	0	70.21	0	0.634315	17.7671	30.7712	18.772	14.5957	0	20.2828	0.421416	0.881285	115.559	12.2961	32.4142	28.216	11.7499	111.224	40.9482	31.8873	16.2748	14.325	0	5.1097
Q15323	KRT31	294.261	1425.54	0	248.206	4.50163	0	138.812	0	9.56035	36.6439	62.8694	29.6604	34.2543	0	34.4392	0.616365	0	287.617	60.4722	73.2678	71.9432	28.1993	229.109	104.017	77.669	32.2189	30.149	0.697653	18.4158
P26439	HSD3B2	258.415	517.956	0.452416	257.813	0.102082	0.915983	259.227	0	0.344003	0.548317	65.4159	97.2242	0.328335	0	97.54	0.950979	0.378135	194.97	0.202257	64.7778	0.268443	32.9606	453.548	0.687737	65.525	32.1996	32.6928	0.610394	0.786498
Q05C16	LRRC63	111.307	224.06	4.01386	113.547	2.12499	0	117.907	0	0	0.3829	26.6819	44.2287	0.429642	0.276116	44.3782	0.477702	0.258147	83.5789	2.62698	30.5711	0	13.1099	200.917	0	28.0876	15.8782	15.3511	3.14855	0.527342
Q9UJL9	ZFP69B	39.6641	77.1664	0.626892	39.3653	0.638633	0.221093	38.7395	1.10058	0.446136	0.996808	9.96847	14.6588	0.36653	1.06963	14.7175	1.15315	0.511519	28.7522	0.554612	10.5278	0.827315	4.84078	67.4483	0.166906	10.578	5.50844	5.38828	0.557655	0.539979
O43914	TYROBP	184.536	347.25	15.6569	170.85	8.34736	0.640337	175.474	27.4029	5.79651	3.69521	44.7691	70.3804	6.74282	3.56721	69.7459	0.720929	2.05914	135.34	1.32026	47.831	0	20.0548	322.018	0	51.1729	25.1194	24.6313	3.82695	2.0849
Q3LI72	KRTAP19-5	121.129	180.702	0.630728	120.253	0.575852	0.403487	60.934	0.92328	0.309459	15.8347	30.1308	15.8918	15.8168	0.988262	15.9304	0.952928	0.779028	120.996	0.388959	30.9379	30.5563	15.2523	90.8926	45.3685	30.8358	15.7734	15.8146	0.714506	0.491363
P33764	S100A3	67.2358	100.152	0.240806	66.5862	0.760015	0.766149	33.5523	0.786217	0.878636	8.47288	16.9281	8.92374	9.16449	0.147572	9.25418	0.987846	0.0651168	66.5965	0.740567	17.0361	16.8253	9.26207	50.3649	25.6189	17.0815	9.03321	8.80696	0.276778	0.421372
Q3LI83	KRTAP24-1	50.1645	75.6606	2.94165	49.6597	2.03465	1.47151	25.6581	1.30796	0.756502	7.35638	12.9793	6.72039	6.90096	0.304599	6.23911	0.371095	0.74923	50.9122	0.22837	13.0077	12.5943	6.65632	38.3213	18.7136	13.425	6.80466	6.61174	0.984583	0.363137
Q2NL67	PARP6	7.54204	14.032	0.489624	6.89279	0.791645	0.566215	7.14927	0.875308	0.754817	0.59226	1.88956	2.5675	0.680817	0.206833	2.50112	1.17221	0.217855	5.83039	0.452454	1.80068	0.763935	1.09843	12.094	0.378564	1.75139	1.5256	1.64772	0.236061	0.940603
P0DPA2	VSIG8	209.398	305.249	46.0307	181.055	12.0474	0	115.69	49.7689	1.71008	35.76	50.5595	32.8008	39.0678	1.44004	33.0648	0.732674	4.69525	196.274	0	47.8357	50.4687	13.2758	156.747	72.0693	56.1611	23.9685	21.1704	5.36174	4.67202
A1A5D9	BICDL2	79.432	117.017	1.74664	75.5957	0	0	38.4067	0.603971	0	9.53419	19.8382	9.87052	10.4462	0	10.3401	3.202	0.751792	81.354	51.6443	20.6497	20.9972	19.7064	59.7887	31.7845	22.2034	12.81	10.2338	1.50761	24.5689
Q14532	KRT32	126.664	197.651	3.82227	122.737	8.23145	2.95606	69.8133	2.02901	0	17.7758	32.8796	15.5752	19.5107	1.76773	16.6024	0.987964	0.790028	142.071	49.2079	37.1052	35.403	40.7112	110.201	53.2236	36.5008	26.1916	23.1613	0.755664	10.9491
Q86SJ6	DSG4	53.4899	82.3624	3.69888	55.7952	1.7324	1.52766	32.8256	0	0.0858307	7.09096	13.6803	7.17773	7.13483	0.240935	8.47604	1.21338	0.123961	55.4319	16.4091	15.9872	13.7189	13.1285	41.439	20.5794	14.1456	10.097	9.0662	4.88978	4.64513
Q86SG7	LYG2	16.6731	23.6689	2.70832	15.6661	2.52391	1.06111	8.11121	2.26067	1.06567	2.3582	4.18338	2.54243	3.11691	0.178186	2.52835	0.398705	0.166081	16.823	1.16378	4.60995	4.39325	2.59939	12.3141	6.13369	5.07077	2.87475	2.82344	0.414472	0.661934
Q9BW60	ELOVL1	12.1467	28.1878	6.87197	4.8038	3.25777	3.61061	8.46006	4.62823	1.65096	2.31226	0.859232	1.47752	1.13876	2.95346	0.599682	0.365302	1.37548	2.10048	2.00208	4.98326	1.37048	0.461588	1.66232	0.386216	5.18946	4.78106	4.38847	3.44058	1.75852
Q3ZCW2	LGALSL	114.774	175.963	18.061	109.141	21.534	1.9406	57.6236	19.882	2.92007	15.1183	26.7239	13.6645	14.9601	1.0731	15.4858	1.12689	0.0749465	160.343	150.736	50.9354	44.4296	107.256	100.181	62.8162	29.9398	30.8351	40.7718	7.1414	29.8215
Q8TF66	LRRC15	97.408	125.258	15.8533	89.835	14.1268	19.964	43.8404	4.82136	0.710408	11.6511	21.3875	13.0205	13.7704	1.44832	16.2971	0.957529	1.12425	94.4354	23.5448	26.1333	21.2636	18.9957	76.0196	33.6988	26.4754	18.7677	16.5838	2.51357	15.0644
P34931	HSPA1L	14.0545	23.8537	10.3173	11.9164	12.0064	3.27052	12.3318	7.40352	2.75215	1.4021	3.1844	4.63588	1.43496	1.87739	4.55258	0.157533	0.507939	11.5219	3.71402	3.32455	0.399678	3.16706	23.3989	0.758745	4.69997	2.8833	2.06037	1.96826	0.971284
O43633	CHMP2A	87.0375	169.465	39.9855	92.8725	30.604	24.3102	82.6024	20.4232	2.56489	12.1897	25.7125	31.5387	8.13824	9.75371	33.6653	1.16072	5.99423	95.5825	46.397	25.7042	6.13265	44.6654	137.93	10.5396	34.1053	21.0757	20.7444	8.8938	4.73227
P61289	PSME3	408.543	600.432	228.839	348.151	183.942	117.621	309.464	123.611	39.2472	34.4933	93.1707	112.803	52.5751	34.3429	117.197	0.763732	17.8746	286.918	124.317	109.328	17.8696	80.1284	538.718	41.2431	134.414	79.6979	68.944	44.2889	48.8982
P51808	DYNLT3	5.61041	7.44903	0.00660011	4.85554	0.990544	0.826106	2.74828	0.405636	0.636893	1.42962	1.98227	0.883635	0.677535	0.0942419	0.944975	0.989958	0.171477	5.20788	0.7616	2.06587	1.71446	1.21477	3.7818	2.49295	1.32689	0.801422	1.05047	0.461531	0.716553
Q92764	KRT35	41.936	52.4577	16.2582	41.9975	10.5988	10.6996	20.785	9.55848	3.74246	6.24935	10.5128	4.76358	10.2753	2.19996	6.46506	0.403519	1.42747	40.7341	4.04913	10.8135	10.0705	9.53734	31.4989	14.7081	11.665	6.83929	7.49354	1.81278	1.24845
Q9P0S9	TMEM14C	1.47492	11.1206	2.07671	1.63258	0.367895	1.79346	2.82214	0.325008	0.999289	0.862476	0.872533	0.165121	1.43087	0.995186	1.40847	1.15861	0.801681	4.82608	8.41282	1.50592	1.36639	5.04705	1.35988	1.28098	0.950792	2.31302	2.32187	1.47754	5.68391
O76015	KRT38	9.44228	13.8809	1.3765	10.5852	1.68255	0.37376	5.09242	0.456387	0.567538	2.33905	2.91612	2.20496	1.50196	0.379117	1.3937	8.7226	0.70367	12.709	7.96284	2.68417	2.84346	6.03833	8.04707	4.71558	3.54546	1.9383	1.73074	0.84258	1.70403
P13637	ATP1A3	5.33086	22.2609	2.19018	3.07311	5.63066	3.69228	4.88058	1.19867	1.39214	1.78944	0.685152	1.1069	0.912519	1.73079	0.884878	1.01134	0.430067	10.5565	10.2569	4.88335	1.44315	7.86218	9.20636	2.81568	3.97791	4.20331	4.91087	1.86531	2.96373
Q14194	CRMP1	3.37671	5.05066	0.407508	3.01813	0.543207	0.720535	2.53522	0.583445	0.288692	0.872642	0.927803	1.24354	0.351471	0.92527	1.48382	1.05198	0.958512	2.08143	0.567806	0.712046	0.0487099	0.748159	4.53713	0.507722	1.60097	1.20664	1.16294	0.0659334	0.0402923
Q9BTT6	LRRC1	18.4149	23.9233	12.5382	15.4952	10.9375	4.16132	13.777	5.40049	3.581	1.80264	3.71717	3.98274	1.83453	1.73959	5.41064	0.629017	0.919693	14.4678	5.77236	4.16974	1.45262	5.9379	23.2077	1.8271	6.90745	3.17539	2.35613	3.43135	1.23261
Q9UHA7	IL36A	72.5332	89.4746	51.4004	31.7879	25.511	18.0007	39.4913	31.042	2.57101	11.3807	1.37211	10.252	10.1812	15.4434	1.42404	0.27467	5.12252	26.3518	36.1036	14.7624	3.62202	19.1976	22.5086	3.41986	30.8524	13.7555	14.584	20.7591	9.97747
Q9UBH0	IL36RN	63.624	175.404	87.3043	35.1292	71.4584	45.728	55.6106	47.8242	18.2773	11.6585	9.61164	9.1098	18.0193	10.2349	5.10279	1.05281	7.57656	82.9327	105.886	42.8195	21.1259	90.0083	58.525	23.6805	30.4342	35.7418	50.0621	13.3377	10.2538
P21128	ENDOU	97.9901	155.408	131.914	115.377	117.223	47.1604	102.366	42.5924	28.4842	17.239	17.4888	11.0882	7.00267	25.8265	28.6119	1.54548	3.22618	99.7129	73.2275	22.3647	21.6296	76.3611	113.481	22.9376	41.501	26.1045	26.5347	31.4989	6.8214
P15104	GLUL	355.245	529.892	258.271	197.07	203.276	101.722	175.178	255.356	24.3461	100.479	0	19.7033	82.6683	161.482	13.7832	1.32226	21.4378	498.447	520.069	212.055	82.4089	423.112	447.598	89.6456	179.592	186.279	253.64	159.515	87.1206
P20336	RAB3A	7.19535	10.637	1.09831	9.33398	6.30819	2.6066	4.25809	4.98062	0.145107	0.8913	1.8687	2.15441	0.511677	2.79141	2.06363	1.04538	0.0197952	6.06248	7.94138	4.61752	0.998057	6.24687	9.65397	2.07496	1.8614	2.83076	3.44177	0.999329	0.794992
P03905	MT-ND4	23.0887	29.0919	21.1653	21.0969	17.8773	9.64599	15.43	13.1421	4.19755	2.22772	5.20624	5.0262	3.7194	5.01168	5.03417	0.35452	1.67886	17.7777	5.79487	6.65559	1.65372	7.32231	27.9156	2.32679	8.0043	4.81704	5.64195	4.71467	1.88831
Q9NV70	EXOC1	0.0981577	0.99848	0.62534	0.190589	0.194041	0.599674	0.629708	0.0131191	0.133639	0.225909	0.89459	0.16163	0.604917	0.931247	0.00999233	0.930355	0.978098	0.383823	0.0104288	0.959617	0.092976	0.205891	0.53532	0.612286	0.225014	0.108639	0.150764	0.286518	0.196978
P08779	KRT16	7236.32	11777.2	8974.94	5842.8	7238.62	2063.79	4637.44	7942.29	1020.23	1470.63	1036.73	1280.77	1590.51	2145.57	962.209	1.55004	308.602	5976.88	3792.51	2858.74	1135.87	2706.65	5047.09	1135.03	2428.11	2653.57	2551.58	1991.89	619.225
P11474	ESRRA	0.573685	0.993319	0.574049	0.743779	0.0986542	0.573301	0.940541	0.43396	0.22626	0.0966071	0.0686813	0.0739424	0.390444	0.466945	0.0645173	0.923618	0.0238194	0.891169	0.392441	0.0144028	0.250745	0.0598043	0.647557	0.748754	0.808676	0.13383	0.525451	0.0518101	0.120042
Q9Y6M1	IGF2BP2	19.2178	26.0055	24.0333	23.1278	12.5981	7.46902	21.3666	13.5426	3.26251	2.58761	6.58844	2.28646	6.64495	4.66431	2.06475	0.439065	3.03057	9.69944	3.01709	2.87324	5.4209	11.7673	12.3791	6.82346	5.69703	3.8972	3.96766	3.20495	1.07921
Q8N1F7	NUP93	33.703	48.4664	31.6173	33.2825	25.2481	18.8	28.2513	14.9978	5.74281	5.31447	9.97736	10.6826	7.34998	7.2617	8.71754	1.17561	3.77665	27.2804	7.71706	8.12972	3.0516	10.7057	44.9413	5.54567	13.9938	6.29133	6.52575	6.65217	1.38359
Q9NQ38	SPINK5	34.1353	41.9468	10.7706	35.2998	13.1238	7.95631	20.8615	9.24001	2.22571	3.99505	7.22149	3.97326	5.23613	4.47883	4.61445	1.22596	0.762933	40.3811	34.6245	16.4206	11.1269	28.4621	32.3946	15.6087	10.523	13.5182	13.5011	7.31835	3.89879
P58107	EPPK1	67.7975	117.942	73.139	52.2953	62.4291	20.5739	38.6688	64.7234	10.2953	8.01245	8.89458	7.28693	14.6688	14.8393	7.2335	0.245045	5.01712	65.6702	89.7746	35.6018	17.2398	61.5932	55.1271	18.5714	24.1631	29.4741	36.6532	11.3137	12.6005
Q9P1Z9	CCDC180	5.33539	6.4036	2.74076	3.60847	0.771295	1.62973	4.22628	2.84326	0.783451	1.0282	0.826521	2.22557	1.5361	0.144811	2.16433	0.829204	1.13451	2.49291	0.823044	1.75085	0.784709	0.750933	5.49979	0.119288	1.32443	1.28554	0.49598	0.709703	0.562129
Q6PI48	DARS2	0.00916479	0.953982	0.537427	0.13462	0.788711	0.142074	0.0680411	0.62187	0.428727	0.132344	0.0608044	0.401331	0.872307	0.927652	0.508895	0.0254371	0.628159	0.891732	0.732855	0.891746	0.429182	0.0414168	0.074589	0.753299	0.0342966	0.459637	0.143131	0.878157	0.353269
Q16394	EXT1	0.186757	0.948088	0.598509	0.924196	0.475586	0.562955	0.468824	0.584612	0.0533434	0.467738	0.438652	0.413063	0.0278013	0.0209176	0.00417592	0.0723177	0.735466	0.621978	0.910165	0.0121612	0.257483	0.424428	0.218693	0.629615	0.00997595	0.681142	0.218983	0.130346	0.583016
Q9ULW8	PADI3	23.4794	32.7241	12.1716	23.5969	12.6636	6.75206	14.1392	4.76963	3.05254	4.85247	6.99014	3.32023	4.54338	2.23457	3.19581	0.966122	0.757437	24.0896	10.884	7.11052	6.22065	7.14516	20.1117	9.82501	8.96236	3.87518	4.74314	3.33427	5.44043
P16050	ALOX15	34.7982	85.275	34.7928	28.3069	31.2713	27.5374	44.284	29.9785	12.0367	2.67974	7.15003	7.62716	9.92005	7.52264	7.37746	1.26017	2.56138	37.1242	59.6929	17.7312	5.39143	42.195	40.2442	8.86942	14.2367	18.8978	19.405	8.66703	21.1258
Q15125	EBP	63.1051	82.1017	42.6347	41.4865	40.4047	20.2073	37.7474	24.7626	3.6463	13.5519	11.4549	6.91716	12.4066	6.72835	9.36472	0.562253	4.24615	68.4969	54.56	21.0871	16.5048	53.3243	53.2838	21.8633	23.7545	14.6594	21.8141	10.5585	5.80409
Q9NQI0	DDX4	2.45348	6.18202	1.50141	0.817748	1.16337	1.51615	2.53473	0.523128	0.8793	0.951264	0.45498	0.465149	0.874398	0.981907	0.864682	0.267471	0.736098	3.86276	0.568999	1.89944	1.48913	0.620315	5.95365	1.57631	2.7965	2.13283	1.61358	1.0088	0.603692
O94788	ALDH1A2	6.80044	8.50751	2.89911	4.774	1.99101	3.4574	4.47966	2.35945	1.02083	1.13457	1.40576	1.59231	1.2055	0.914868	1.52104	1.2922	0.260059	5.9163	6.8414	2.2035	0.188327	4.96176	8.15793	0.842524	2.16511	2.57679	2.67322	0.251011	4.19632
Q9NZH8	IL36G	196.103	207.563	192.693	136.185	168.134	81.1093	138.134	126.302	31.0293	27.0417	21.983	25.5849	34.6401	31.7945	24.4166	0.643681	8.93155	172.042	202.558	54.5107	23.8403	134.696	169.743	36.7025	75.9595	57.3146	54.4591	52.9009	60.3798
D6REC4	CFAP99	76.9446	116.938	75.0065	37.3263	70.647	37.61	65.8254	54.9201	6.36659	17.2135	9.40931	9.34238	21.3587	11.3889	11.6621	2.33044	10.9683	64.0765	50.8917	25.118	10.8229	39.42	71.4942	16.9988	30.9886	20.6523	24.5777	16.2515	15.9975
O95758	PTBP3	93.6916	218.483	161.372	86.1326	109.438	74.356	92.3982	116.05	59.4162	25.2138	11.8197	19.6775	35.4592	14.885	19.0856	2.80656	7.48169	128.951	105.77	41.7804	16.828	80.0666	85.87	24.0814	32.7288	44.76	54.1744	25.976	72.9942
A0A0B4J1V6	IGHV3-73	0.950314	0.977291	0.819972	0.860188	0.0307539	0.112307	0.0972273	0.0619168	0.581124	0.103211	0.589173	0.00667745	0.192857	0.630837	0.782113	0.942594	0.263854	0.051788	0.127157	0.298652	0.859297	0.083542	0.47299	0.626953	0.275539	0.65565	0.707379	0.587055	0.546139
P51809	VAMP7	18.0406	18.4925	13.4752	15.8038	10.0103	5.60556	9.06585	7.4899	3.91713	2.69423	4.48758	3.75712	4.9349	3.01752	1.9725	0.815189	1.82071	12.8456	2.17829	3.54546	3.39954	3.96957	13.2767	3.85218	5.49023	2.63925	2.5569	3.33738	1.21618
P29323	EPHB2	0.983243	0.992973	0.417295	0.107255	0.725965	0.620554	0.0702619	0.627874	0.931823	0.214188	0.103602	0.556792	0.0609068	0.0613594	0.726224	0.562717	0.802672	0.198486	0.0629098	0.222255	0.056818	0.965298	0.186176	0.431103	0.672817	0.69444	0.927257	0.795231	0.0523725
P68366	TUBA4A	140.5	143.519	110.208	100.516	108.324	75.0274	78.579	57.4397	22.5199	24.523	23.7447	10.9556	27.4338	26.2916	17.5456	0.570558	5.61767	127.667	70.6508	38.7013	20.2792	76.33	125.679	33.0566	55.4534	35.3144	38.0568	32.1569	20.1991
P12724	RNASE3	336.875	898.923	378.826	235.424	283.664	316.739	489.151	290.226	124.491	104.085	75.8148	72.7758	186.363	119.851	60.38	1.54089	49.2253	717.781	606.473	232.633	89.1653	536.712	768.159	225.026	255.072	294.971	313.508	184.867	181.305
A6NDU8	C5orf51	0.290122	0.989301	0.523639	0.575677	0.27107	0.024713	0.278414	0.890086	0.649454	0.374716	0.0304476	0.860638	0.0663401	0.783278	0.466589	0.292127	0.968148	0.0680129	0.121284	0.555331	0.49144	0.886167	0.95775	0.150339	0.631116	0.854425	0.06452	0.01349	0.820605
P26232	CTNNA2	11.3139	13.9272	6.95101	4.30127	5.23972	4.27739	6.08686	3.22557	2.99369	2.3539	2.02775	0.407448	1.03877	1.56146	1.96373	0.472111	0.555981	5.79017	5.12182	2.55649	1.66895	3.48628	7.13261	1.3493	4.80614	3.35153	3.03059	2.04348	1.73409
Q9C098	DCLK3	0.0999294	0.962386	0.785526	0.591195	0.204319	0.30974	0.126387	0.829932	0.528914	0.254336	0.423855	0.508314	0.832914	0.299673	0.00120044	0.721561	0.0642369	0.255377	0.105814	0.0490719	0.615309	0.0404928	0.81061	0.483292	0.850051	0.141416	0.176684	0.551631	0.635764
Q9Y446	PKP3	89.0642	111.963	107.273	69.051	86.2049	44.7434	45.7938	64.4406	12.9147	20.5294	16.0034	9.09291	24.6952	25.7884	11.2617	0.650385	9.18386	81.2848	60.1437	27.6434	14.1107	49.3545	79.2572	18.9342	39.2739	25.0426	29.7868	24.918	18.6919
P13674	P4HA1	36.2934	43.5607	43.4515	24.6708	26.1621	18.2477	24.1995	21.8405	6.35797	7.37245	6.82793	4.11688	11.6494	8.70079	5.08952	1.62918	3.86443	40.2289	42.3927	12.8035	9.30857	39.6329	35.5901	11.6437	15.7377	11.5156	15.7979	6.59046	4.91511
Q9H3Y6	SRMS	0.85802	0.97335	0.329874	0.928653	0.925749	0.539334	0.30194	0.0269726	0.378872	0.920806	0.584766	0.113834	0.829515	0.133922	0.959224	0.283381	0.488792	0.387147	0.475623	0.267179	0.432679	0.652733	0.0836869	0.00582761	0.855885	0.600855	0.795069	0.0313834	0.014899
Q9H1J7	WNT5B	0.826166	0.981103	0.270943	0.725124	0.246458	0.86963	0.816419	0.779376	0.164637	0.488815	0.974	0.885048	0.0058573	0.0215547	0.697819	0.153828	0.217732	0.600133	0.153683	0.878375	0.738116	0.399621	0.480306	0.45011	0.913659	0.0111636	0.800761	0.033307	0.145127
Q9BU89	DOHH	0.168122	0.964545	0.118734	0.085946	0.572164	0.845444	0.128559	0.324521	0.830474	0.878081	0.347889	0.809893	0.54985	0.0822875	0.691094	0.305929	0.531657	0.736308	0.0834211	0.860421	0.769898	0.459087	0.245144	0.0791239	0.556554	0.113301	0.228023	0.081829	0.100609
Q9HAV7	GRPEL1	13.7069	21.986	12.5811	6.3117	9.95167	8.0268	8.08501	7.72897	2.53188	2.23916	1.10259	1.26963	3.22512	3.32172	1.48393	0.871381	1.17714	9.64818	9.84503	5.87059	2.121	4.65373	11.6175	3.87932	6.9468	6.21394	5.63718	4.89096	2.58378
P09234	SNRPC	85.9387	118.849	118.127	80.7596	103.966	66.3889	69.8413	49.5108	23.9787	19.0567	23.3311	18.7664	21.7332	20.1918	17.1788	1.80938	10.4476	92.8521	114.95	27.2016	13.8026	86.7622	94.2382	25.9739	42.9184	27.4866	34.3613	23.1699	32.2354
Q00796	SORD	70.7466	101.491	86.097	53.0684	59.0676	45.3798	40.4993	40.7704	15.8949	14.2652	16.7608	9.19776	20.7461	18.7374	9.09844	0.827027	7.85629	75.0946	76.0718	24.335	16.8643	60.0819	54.1679	18.0042	28.7723	20.0586	29.5866	16.472	17.7697
Q8IYS2	KIAA2013	0.171024	0.957783	0.485599	0.836632	0.294017	0.065737	0.0461216	0.934952	0.310924	0.491237	0.45546	0.136234	0.432324	0.0160107	0.458549	0.7815	0.674457	0.506195	0.92267	0.608279	0.0705057	0.438163	0.0469447	0.242886	0.547448	0.0555794	0.269831	0.79076	0.33025
Q6NUM6	TYW1B	0.0939862	0.974091	0.905889	0.5761	0.482801	0.239208	0.562773	0.266143	0.194031	0.359573	0.95196	0.643675	0.0894608	0.32079	0.0142997	0.591246	0.0313552	0.254264	0.0502614	0.138413	0.70999	0.391842	0.754209	0.456931	0.097612	0.641681	0.180063	0.608269	0.864392
Q6A162	KRT40	2.36657	3.75236	1.43607	2.34725	0.971432	1.01634	1.58107	0.59657	0.303049	0.837224	0.852564	0.739295	0.471379	0.526393	0.42731	0.253241	0.677499	3.40434	0.807209	0.663653	1.48174	0.721418	2.32204	1.32859	1.00813	0.582626	0.694271	1.036	0.0555625
Q9NP80	PNPLA8	0.857995	0.969519	0.53756	0.0383152	0.164806	0.58278	0.0891223	0.433632	0.669394	0.811022	0.272603	0.730651	0.197475	0.0149525	0.265606	0.197532	0.958625	0.063696	0.8908	0.564276	0.200784	0.180656	0.342037	0.930888	0.660974	0.896987	0.144536	0.944036	0.28178
Q5JT25	RAB41	0.894302	0.9402	0.888578	0.106896	0.61211	0.935009	0.858514	0.0781571	0.428857	0.874496	0.872029	0.930898	0.541228	0.720086	0.437819	0.241104	0.306683	0.179238	0.0871063	0.403308	0.443812	0.841664	0.0578283	0.283056	0.0805826	0.0477869	0.51511	0.536667	0.0204867
Q9UNW1	MINPP1	0.808019	0.984181	0.438418	0.224679	0.56336	0.333624	0.58208	0.400069	0.282384	0.586074	0.367389	0.376873	0.649781	0.973165	0.516938	0.867685	0.639047	0.609166	0.854469	0.203608	0.0432237	0.00840283	0.0728943	0.828856	0.150599	0.233223	0.0407826	0.227512	0.013099
Q08426	EHHADH	0.373714	0.898216	0.742147	0.272887	0.276968	0.0630584	0.116597	0.0153678	0.624374	0.192286	0.579685	0.653507	0.20297	0.796489	0.0783362	0.736856	0.0763821	0.0190868	0.807432	0.79981	0.148827	0.302157	0.794684	0.85623	0.345025	0.244387	0.660949	0.734339	0.746502
Q8TCS8	PNPT1	19.6154	22.2234	19.0884	19.303	14.2899	15.54	12.7027	10.7227	2.77913	2.80375	4.85568	5.31852	3.7742	4.47357	5.55094	0.715622	2.2966	15.6914	8.49928	5.88888	1.7074	7.94679	19.988	4.59558	9.3221	6.22118	6.4215	4.95514	1.83745
P11678	EPX	964.099	2038.57	1535.57	695.758	1074.05	839.5	1239.52	1270.86	402.562	177.465	267.026	243.231	512.79	202.402	245.049	1.33875	135.333	1138.41	1332.07	437.963	201.152	990.967	1227.77	418.498	476.196	567.02	541.249	292.437	569.244
P39210	MPV17	0.689111	0.876391	0.128244	0.234158	0.593221	0.807544	0.43815	0.794271	0.805857	0.0209609	0.397585	0.133801	0.0698807	0.0975276	0.182057	0.0125253	0.478593	0.310381	0.819985	0.254266	0.858771	0.529336	0.863205	0.331268	0.0795002	0.483333	0.167887	0.336937	0.653867
Q15058	KIF14	0.855385	0.992595	0.121644	0.987275	0.947977	0.2325	0.78541	0.871562	0.391842	0.508546	0.0415928	0.00664338	0.289066	0.169048	0.775074	0.563096	0.962409	0.699962	0.0759244	0.756525	0.256169	0.451746	0.501573	0.00110567	0.435484	0.414685	0.481149	0.598839	0.0826818
P22748	CA4	0.0292651	0.959061	0.243898	0.371178	0.841367	0.604921	0.176654	0.76192	0.528689	0.352675	0.259493	0.487764	0.886257	0.926944	0.482657	0.0166784	0.190867	0.00447826	0.785096	0.0641274	0.516896	0.565231	0.864712	0.234999	0.952475	0.440708	0.434205	0.219637	0.109072
Q5VIR6	VPS53	0.735376	0.987136	0.102415	0.045379	0.291613	0.669686	0.0600514	0.0985451	0.499107	0.531447	0.641739	0.245011	0.108346	0.0418715	0.652066	0.596008	0.240098	0.607582	0.836571	0.0402684	0.363546	0.887117	0.840926	0.397147	0.620864	0.537367	0.721298	0.219283	0.116783
Q9UQ13	SHOC2	0.529709	0.935641	0.176406	0.582756	0.219781	0.16373	0.180099	0.0605502	0.79685	0.637101	0.515384	0.231837	0.739441	0.854378	0.379337	0.0775183	0.445164	0.887968	0.104204	0.221701	0.858125	0.346133	0.923817	0.876462	0.0788634	0.0318993	0.821159	0.203945	0.923603
Q9UBB6	NCDN	0.182818	0.963427	0.039165	0.605559	0.635405	0.140655	0.103032	0.592943	0.784297	0.752082	0.680413	0.785497	0.473949	0.0985254	0.437187	0.239725	0.86732	0.105147	0.180761	0.930381	0.482689	0.0443284	0.00366129	0.171404	0.69053	0.536252	0.747014	0.447464	0.757212
Q7L775	EPM2AIP1	0.628216	0.970771	0.0895019	0.0671387	0.040017	0.609077	0.440071	0.0210222	0.325856	0.621154	0.847354	0.351854	0.347882	0.424311	0.716752	0.533026	0.297213	0.516973	0.609642	0.0329743	0.125494	0.934047	0.0257822	0.4191	0.295951	0.957968	0.755096	0.70146	0.93762
Q29963	Q29963	0.793745	0.821879	0.804967	0.173579	0.189507	0.0131788	0.294096	0.290131	0.20178	0.605262	0.654745	0.597499	0.522999	0.409506	0.611707	0.585234	0.299299	0.779204	0.173637	0.020564	0.0150901	0.516712	0.240559	0.285363	0.803178	0.248574	0.13317	0.77002	0.0626403
P37268	FDFT1	0.0211624	0.984828	0.341774	0.876059	0.832777	0.287714	0.326247	0.06738	0.644184	0.475451	0.812021	0.575186	0.00408846	0.323094	0.128176	0.209679	0.505487	0.950474	0.949827	0.341724	0.123366	0.301439	0.644004	0.903426	0.290571	0.35739	0.0766442	0.410088	0.902108
P21953	BCKDHB	0.574749	0.838133	0.427676	0.430813	0.374002	0.0452574	0.13	0.0216107	0.189753	0.383696	0.300442	0.0677171	0.227851	0.0662927	0.0221073	0.437014	0.565631	0.542233	0.109775	0.294081	0.808839	0.66858	0.629529	0.198808	0.579075	0.807679	0.643199	0.253591	0.817909
P78545	ELF3	0.00173963	0.993217	0.841918	0.173286	0.888017	0.441673	0.749254	0.770826	0.477496	0.0387662	0.511402	0.134921	0.825811	0.290076	0.176391	0.653816	0.646256	0.463813	0.28047	0.783646	0.843571	0.68764	0.0638817	0.377421	0.0249406	0.976476	0.0848328	0.51391	0.395729
Q14155	ARHGEF7	5.4097	7.96941	3.47666	4.66572	2.18477	0.949709	4.0611	1.15741	1.68698	0.956651	1.9008	1.82921	0.762467	1.20543	2.39927	0.859355	1.18513	3.81671	2.94888	1.89683	0.55683	1.82564	6.55975	0.761823	2.15433	1.33665	0.963283	1.45228	1.85632
Q96HQ2	CDKN2AIPNL	20.6505	30.1576	21.1165	24.6102	22.987	14.7751	24.9235	16.8776	8.54303	4.67377	7.36954	6.24117	3.35468	4.48538	5.47743	0.791128	2.58552	15.2921	7.20764	5.49217	4.63264	13.8683	19.7971	11.4113	12.2086	7.10806	8.51674	8.35948	0.659619
Q9NYU1	UGGT2	0.0557214	0.928231	0.0078613	0.591015	0.768466	0.562322	0.627641	0.302335	0.842039	0.181434	0.131889	0.0327281	0.50271	0.273954	0.737769	0.295463	0.07265	0.66813	0.36454	0.367358	0.252578	0.106075	0.203415	0.65054	0.576441	0.128676	0.556506	0.338627	0.25963
P98172	EFNB1	0.498579	0.990399	0.214534	0.65459	0.699057	0.187416	0.392797	0.733731	0.878489	0.853785	0.723064	0.514362	0.0342632	0.255986	0.255593	0.311279	0.483253	0.168044	0.450667	0.984195	0.785268	0.0876063	0.0202192	0.0594158	0.497931	0.646856	0.321562	0.0178237	0.718053
Q9NX61	TMEM161A	0.0945006	0.979902	0.533132	0.0938604	0.417975	0.204813	0.289487	0.482184	0.706172	0.30083	0.211469	0.650332	0.603272	0.308	0.260995	0.00463484	0.218041	0.0263489	0.845962	0.417336	0.794703	0.848641	0.966052	0.669025	0.574774	0.406081	0.0080751	0.343677	0.751189
Q96MM3	ZFP42	0.918969	0.996584	0.539919	0.0267531	0.547621	0.225533	0.308706	0.463489	0.0972519	0.852987	0.154744	0.39097	0.484305	0.203838	0.76368	0.744678	0.0645027	0.111434	0.986621	0.0775355	0.275506	0.871807	0.32864	0.617185	0.127562	0.707039	0.614703	0.342693	0.229238
Q5SGD2	PPM1L	0.319645	0.930984	0.428383	0.0843774	0.888545	0.387874	0.383596	0.603789	0.056949	0.140043	0.444691	0.606549	0.0268688	0.00132083	0.878351	0.337362	0.467348	0.190753	0.638834	0.512832	0.380333	0.348336	0.631978	0.869614	0.0644157	0.699677	0.91303	0.119897	0.638132
P01920	HLA-DQB1	44.2963	59.8048	43.3506	43.5544	39.0065	39.691	33.5218	19.7339	6.40049	11.4516	11.5503	9.02259	13.7573	13.562	5.79778	0.81538	5.31112	50.7183	29.5949	19.6093	9.6543	41.7466	45.566	18.2182	27.2641	18.7647	21.5388	15.4255	3.04512
Q9NWS0	PIH1D1	0.0460623	0.978015	0.681337	0.089194	0.917826	0.772708	0.161401	0.39113	0.684859	0.941541	0.771912	0.0411025	0.644452	0.494539	0.314251	0.737364	0.2598	0.0552153	0.61097	0.727175	0.417773	0.901333	0.235085	0.810055	0.813006	0.0377382	0.63094	0.0514572	0.920732
Q8NFQ8	TOR1AIP2	0.233669	0.984513	0.791269	0.914562	0.0161819	0.810785	0.0637277	0.539002	0.57951	0.166858	0.754883	0.217604	0.291882	0.705716	0.35908	0.449954	0.402635	0.640478	0.124305	0.465914	0.188862	0.396436	0.281424	0.831793	0.442957	0.0562192	0.331763	0.0171686	0.301107
Q7Z4H8	POGLUT3	0.975819	0.989826	0.774498	0.519952	0.985586	0.44581	0.919946	0.85894	0.03358	0.405976	0.371145	0.0522643	0.736147	0.295581	0.421816	0.382234	0.12068	0.0525061	0.144388	0.520841	0.26644	0.194961	0.846306	0.97375	0.222513	0.31751	0.823919	0.168263	0.288296
A6NFQ2	TCAF2	1.26546	5.04338	1.09108	1.67357	1.00969	0.591546	1.63849	1.62634	0.936583	0.421393	0.720922	0.238672	0.386678	1.56878	0.834091	1.43647	0.872478	2.13396	4.2857	2.78928	1.34494	3.73641	1.42705	1.15606	0.91337	1.89183	2.73548	0.868842	0.438534
O75928	PIAS2	0.752928	0.978135	0.652953	0.580414	0.165415	0.0908839	0.146928	0.733485	0.25076	0.150642	0.751872	0.679914	0.438341	0.0351813	0.0749462	0.785155	0.959387	0.802484	0.00225413	0.622971	0.553456	0.40376	0.66794	0.0353678	0.715139	0.627416	0.234075	0.684249	0.426795
Q9BQB6	VKORC1	0.0362535	0.97357	0.81353	0.313865	8.82e-05	0.540076	0.419129	0.508571	0.627873	0.750853	0.698156	0.433236	0.89292	0.392809	0.418767	0.443346	0.125807	0.745035	0.901471	0.671088	0.73941	0.25481	0.170548	0.19551	0.937534	0.0121637	0.456254	0.890418	0.0328821
P13727	PRG2	262.263	482.986	438.104	254.337	270.03	274.727	347.845	330.332	97.5152	51.5156	94.7249	81.1917	151.474	68.8436	80.7026	0.560484	28.0374	388.964	462.074	132.892	76.6933	385.845	392.695	169.945	166.719	198.128	187.504	114.494	129.935
P0DP03	IGHV3-30-5	0.563158	0.975	0.52497	0.769664	0.401668	0.893483	0.906929	0.0936843	0.366207	0.0908281	0.872582	0.495194	0.575324	0.619706	0.126512	0.447173	0.0842681	0.353815	0.0670116	0.764634	0.0364099	0.550345	0.219368	0.29493	0.00214397	0.373323	0.714867	0.527003	0.729339
Q8NBI2	CYB561A3	0.80856	0.98733	0.926776	0.0523109	0.567003	0.334945	0.531615	0.0550934	0.149754	0.337506	0.940778	0.528995	0.0347733	0.537156	0.747424	0.668364	0.863519	0.811461	0.122181	0.0848448	0.110329	0.1326	0.43269	0.870871	0.264404	0.452408	0.527299	0.775083	0.440108
Q12981	BNIP1	0.587723	0.973485	0.112434	0.170221	0.946708	0.759129	0.621881	0.27941	0.971597	0.019497	0.101332	0.800857	0.322139	0.785945	0.629505	0.21745	0.831447	0.89089	0.862919	0.0917989	0.441899	0.258778	0.697554	0.209513	0.963804	0.247921	0.409401	0.425071	0.0479811
Q9BYC8	MRPL32	0.515978	0.97016	0.741113	0.227272	0.800418	0.742275	0.139684	0.748101	0.371748	0.338521	0.268111	0.0652927	0.749762	0.927693	0.0209978	0.316804	0.600587	0.494054	0.814349	0.130355	0.511895	0.508026	0.0644763	0.289101	0.899273	0.735307	0.159765	0.555447	0.0168937
P30443	P30443	0.241097	0.98825	0.16297	0.431814	0.544912	0.529052	0.0613159	0.056333	0.652616	0.944577	0.0384578	0.619588	0.869983	0.780255	0.144408	0.498539	0.617077	0.85391	0.230349	0.290808	0.594986	0.272161	0.145469	0.196195	0.0896798	0.810967	0.253201	0.503695	0.519253
Q9HB90	RRAGC	0.318043	0.992563	0.986591	0.514507	0.871316	0.97961	0.807737	0.616334	0.940979	0.780909	0.325992	0.87947	0.451001	0.0292996	0.843701	0.471636	0.00894503	0.31171	0.375158	0.151863	0.0971913	0.133296	0.940818	0.233142	0.485729	0.353835	0.176091	0.201493	0.951321
Q9UGK3	STAP2	0.789077	0.970197	0.133267	0.235461	0.200282	0.310333	0.0818081	0.288429	0.654514	0.509771	0.934478	0.738409	0.397929	0.889867	0.664883	0.585658	0.0469323	0.0485548	0.14846	0.221837	0.236465	0.823608	0.502683	0.132949	0.129665	0.578546	0.677003	0.310936	0.457249
P22681	CBL	0.87689	0.896122	0.369243	0.347231	0.716962	0.511763	0.696302	0.753225	0.170458	0.694454	0.673732	0.620584	0.521155	0.106054	0.0876364	0.582325	0.38005	0.148279	0.0354946	0.271029	0.0734441	0.696838	0.831084	0.182976	0.617688	0.338706	0.156065	0.0321426	0.257557
O60499	STX10	0.135507	0.970687	0.0687376	0.269081	0.241941	0.73448	0.720953	0.409863	0.029863	0.652397	0.026229	0.790016	0.747146	0.75104	0.593901	0.4192	0.401137	0.165142	0.879321	0.814235	0.487949	0.714539	0.752399	0.67295	0.105227	0.618648	0.00836373	0.815265	0.320571
O95861	BPNT1	12.8564	15.9619	15.912	11.5455	11.7325	9.81843	7.42781	10.5296	2.75833	1.7883	4.13728	2.05723	5.09296	3.13309	2.54003	2.58341	1.66865	15.0421	15.942	4.12465	2.34451	12.3892	12.3516	4.4278	6.60636	4.12042	4.39659	3.85405	3.86422
P42336	PIK3CA	0.12171	0.883715	0.813008	0.0972711	0.00836086	0.444849	0.255408	0.308894	0.206197	0.491388	0.0179958	0.543269	0.626343	0.444836	0.313267	0.218171	0.182841	0.125339	0.362468	0.868897	0.557547	0.162871	0.494406	0.199788	0.472455	0.5257	0.827123	0.535732	0.171516
P57087	JAM2	0.277078	0.945745	0.656851	0.140024	0.0836445	0.734799	0.87402	0.35899	0.725677	0.102219	0.576585	0.0631558	0.884022	0.638598	0.0097083	0.352842	0.408355	0.36353	0.137868	0.874137	0.440817	0.816595	0.192923	0.116303	0.435062	0.868975	0.495783	0.256257	0.644919
Q9Y2H5	PLEKHA6	0.896299	0.951871	0.864275	0.0367444	0.92311	0.465836	0.453142	0.806373	0.0404084	0.27065	0.472802	0.6759	0.826149	0.0830879	0.366583	0.857177	0.804717	0.0117366	0.90169	0.498904	0.410577	0.817392	0.123028	0.441789	0.883504	0.877579	0.413082	0.011535	0.705149
Q12893	TMEM115	0.510629	0.987508	0.136455	0.212715	0.274238	0.0577202	0.445808	0.509494	0.2769	0.0516834	0.925601	0.186666	0.315499	0.610196	0.787336	0.293637	0.494558	0.362761	0.106489	0.824673	0.585122	0.867861	0.557274	0.760651	0.105038	0.79665	0.644436	0.0356399	0.947681
P01597	IGKV1-39	0.788056	0.949335	0.295776	0.0379052	0.886373	0.698031	0.354304	0.665211	0.196325	0.521354	0.474286	0.294238	0.0437797	0.753379	0.791971	0.874131	0.286207	0.443823	0.0506828	0.59635	0.898416	0.19366	0.0285139	0.0662246	0.412507	0.544895	0.460506	0.892359	0.829527
Q8NI35	PATJ	0.425512	0.882337	0.297478	0.286158	0.8564	0.750792	0.781752	0.390435	0.548826	0.444891	0.101302	0.0852909	0.127256	0.322786	0.0582918	0.5902	0.711858	0.478924	0.669746	0.204896	0.0344927	0.418854	0.497937	0.0828366	0.735948	0.208101	0.0523535	0.42846	0.3696
P49454	CENPF	0.0837044	0.947011	0.755128	0.67886	0.16743	0.482482	0.625868	0.74557	0.267399	0.358966	0.241668	0.213238	0.858842	0.381253	0.602307	0.0857598	0.462181	0.240055	0.199127	0.66673	0.0245647	0.913413	0.617958	0.224752	0.0152691	0.782078	0.313743	0.389457	0.257791
P02750	LRG1	0.825029	0.971802	0.871659	0.243505	0.376754	0.510219	0.0225611	0.307378	0.435413	0.39157	0.669411	0.928376	0.836825	0.790689	0.323138	0.573504	0.10582	0.908291	0.82264	0.918176	0.0738151	0.0917304	0.144541	0.940607	0.757044	0.912802	0.896675	0.169603	0.0672597
Q9BXD5	NPL	0.0402089	0.932699	0.00761628	0.16376	0.531014	0.0597954	0.122821	0.224877	0.812379	0.170855	0.817503	0.378835	0.927925	0.923478	0.449483	0.0916063	0.302451	0.421329	0.545539	0.232617	0.652557	0.678834	0.626086	0.907513	0.717956	0.565465	0.416948	0.583303	0.804951
Q9H4A6	GOLPH3	0.8154	0.992643	0.163384	0.227844	0.178081	0.688742	0.3527	0.610156	0.804263	0.44265	0.363341	0.31007	0.174202	0.076452	0.554019	0.313884	0.695884	0.184893	0.0372436	0.230554	0.831644	0.929679	0.671472	0.125046	0.0806923	0.616665	0.173719	0.724048	0.691192
Q8N184	ZNF567	0.209094	0.924557	0.146227	0.0251046	0.791505	0.272543	0.881141	0.610979	0.0924541	0.544522	0.0651467	0.574867	0.417748	0.307208	0.14886	0.514392	0.406934	0.765465	0.174808	0.690731	0.284686	0.687356	0.414852	0.573224	0.791421	0.00855793	0.818568	0.575555	0.248946
Q8IU81	IRF2BP1	0.335665	0.962866	0.68102	0.59403	0.896621	0.936231	0.660496	0.0801215	0.0307413	0.829686	0.0561596	0.955669	0.671999	0.417436	0.809798	0.868208	0.838981	0.422066	0.135369	0.267937	0.86142	0.0747441	0.510781	0.920966	0.452537	0.417168	0.000368037	0.94829	0.38623
Q12789	GTF3C1	0.401435	0.982135	0.634975	0.138891	0.185513	0.516882	0.603614	0.0207178	0.981292	0.313397	0.173754	0.617922	0.036709	0.0640456	0.792611	0.123781	0.939335	0.67033	0.190102	0.357072	0.442906	0.707587	0.921672	0.487416	0.255337	0.340458	0.524315	0.900853	0.719728
P13640	MT1G	0.801261	0.992436	0.89026	0.640403	0.759195	0.0717838	0.235218	0.057746	0.820845	0.0872228	0.74485	0.913308	0.382478	0.541181	0.645869	0.734339	0.658653	0.829585	0.226953	0.154211	0.88392	0.123188	0.934252	0.0683798	0.884304	0.171965	0.797516	0.116834	0.667616
Q5SZL2	CEP85L	0.594857	0.991979	0.853028	0.338211	0.60604	0.0498737	0.183169	0.928419	0.320659	0.779848	0.680664	0.181093	0.0687101	0.140878	0.401509	0.192298	0.226294	0.380507	0.428944	0.705331	0.97264	0.661833	0.185081	0.385568	0.206338	0.130189	0.968145	0.190075	0.521971
P56962	STX17	0.627716	0.999841	0.933738	0.310453	0.346823	0.377321	0.415142	0.0456418	0.589348	0.000434135	0.240684	0.00879829	0.186818	0.768953	0.779086	0.175796	0.574638	0.285104	0.278009	0.564715	0.369758	0.33716	0.565951	0.788221	0.819079	0.598669	0.2403	0.347538	0.141357
Q9BV36	MLPH	0.340344	0.996774	0.636108	0.166775	0.865541	0.22247	0.910801	0.61997	0.17609	0.746079	0.316437	0.865718	0.634872	0.0717321	0.519013	0.0883643	0.175781	0.0425381	0.337647	0.692305	0.133074	0.63841	0.865787	0.234173	0.113716	0.62989	0.718345	0.268628	0.702604
Q9Y5W9	SNX11	0.562998	0.995132	0.747238	0.463606	0.719051	0.79313	0.455633	0.304055	0.164429	0.262507	0.748033	0.0847758	0.301362	0.793146	0.264073	0.779213	0.469559	0.950845	0.703533	0.982603	0.25946	0.545698	0.384566	0.0166685	0.471199	0.0185917	0.118552	0.949751	0.110598
P15056	BRAF	0.824519	0.988175	0.547096	0.0248741	0.570099	0.722722	0.0287644	0.342458	0.0286878	0.473117	0.517349	0.412263	0.840011	0.175563	0.433093	0.490189	0.718285	0.585979	0.113725	0.812145	0.767359	0.616463	0.140905	0.140605	0.622391	0.4411	0.0865088	0.508982	0.915246
O94964	SOGA1	0.205475	0.992685	0.264545	0.3818	0.22293	0.883088	0.194706	0.333051	0.586645	0.30819	0.820903	0.466506	0.486979	0.708431	0.713531	0.0590409	0.482003	0.0583753	0.532366	0.411701	0.97345	0.1213	0.627357	0.176511	0.319227	0.156987	0.0199041	0.60255	0.313414
P19801	AOC1	0.427385	0.941326	0.753828	0.0116531	0.45536	0.165224	0.106567	0.498011	0.640077	0.334038	0.205974	0.907986	0.0832736	0.565676	0.868854	0.266879	0.779647	0.605969	0.692432	0.473073	0.733895	0.92532	0.233217	0.307437	0.889658	0.419501	0.0560351	0.0631601	0.637542
O60637	TSPAN3	0.853844	0.975262	0.467325	0.231112	0.289239	0.289502	0.804697	0.705893	0.934908	0.597981	0.726732	0.60487	0.24134	0.728831	0.05401	0.836686	0.208558	0.0145357	0.190897	0.223652	0.188636	0.288361	0.609159	0.922886	0.665304	0.463031	0.217432	0.903013	0.0530119
Q29974	Q29974	0.219428	0.976989	0.814236	0.612483	0.115326	0.512955	0.937586	0.0839593	0.467573	0.534729	0.44604	0.00961178	0.751274	0.247218	0.769143	0.52809	0.745962	0.442838	0.240555	0.715298	0.342085	0.429545	0.187636	0.627118	0.829877	0.129497	0.192204	0.00730438	0.642147
O75554	WBP4	0.208164	0.986172	0.772563	0.784034	0.227436	0.703527	0.871846	0.0565487	0.509879	0.493787	0.385737	0.414692	0.172336	0.189944	0.693322	0.885365	0.761458	0.0612243	0.968811	0.0953381	0.177477	0.915814	0.249053	0.774084	0.346112	0.183729	0.18966	0.345481	0.749504
Q8TB52	FBXO30	0.577096	0.999723	0.527966	0.546998	0.77886	0.935366	0.827875	0.265514	0.421988	0.145566	0.25516	0.0941376	0.287098	0.834063	0.693988	0.206127	0.0427343	0.164604	0.365575	0.132449	0.693387	0.248262	0.471509	0.589483	0.161767	0.0987168	0.240134	0.304418	0.299195
Q9NU19	TBC1D22B	0.236781	0.987639	0.285316	0.985196	0.15436	0.428269	0.291042	0.0188001	0.437669	0.359275	0.4406	0.650634	0.650417	0.107289	0.245758	0.895419	0.446833	0.615879	0.115721	0.451001	0.406737	0.0433016	0.670697	0.398282	0.729792	0.98359	0.0776214	0.416694	0.359229
Q5H9F3	BCORL1	0.0955214	0.994692	0.578959	0.618223	0.490879	0.341485	0.16425	0.90273	0.157753	0.265299	0.602427	0.315585	0.258656	0.0403715	0.167313	0.763521	0.647991	0.845347	0.0630142	0.61774	0.939134	0.126017	0.650768	0.778201	0.481422	0.724986	0.0565707	0.604517	0.602335
Q9NUP1	BLOC1S4	0.900907	0.984458	0.419558	0.660929	0.336215	0.611266	0.713285	0.66466	0.0430967	0.633034	0.059248	0.503345	0.706469	0.254366	0.26841	0.77438	0.135746	0.534964	0.74741	0.078874	0.536906	0.76314	0.0831684	0.308769	0.77516	0.680242	0.143996	0.051755	0.948812
P23677	ITPKA	0.152833	0.993501	0.778383	0.317039	0.672275	0.281604	0.798995	0.0189085	0.0685298	0.166597	0.162474	0.847661	0.831863	0.360725	0.725669	0.980747	0.581191	0.988092	0.715321	0.860988	0.86729	0.156443	0.540918	0.906824	0.636978	0.774878	0.308356	0.00861079	0.410959
Q6NUT3	MFSD12	0.853861	0.930414	0.927629	0.831106	0.620877	0.730828	0.820873	0.074978	0.523959	0.453423	0.34477	0.324738	0.708699	0.0581753	0.376395	0.371466	0.444091	0.0178482	0.564334	0.00609717	0.832839	0.253327	0.66576	0.100678	0.482768	0.496549	0.0975124	0.574005	0.568193
Q96JB5	CDK5RAP3	8.87235	12.1745	9.88906	8.20058	7.35086	7.1796	5.76502	3.36227	1.42562	4.74247	2.96833	1.60825	2.99365	3.49792	2.43203	0.857926	1.52769	10.4383	3.4182	2.60949	1.56227	5.78486	7.14493	2.63523	5.19652	2.48187	2.68606	3.56343	1.14943
Q2KHT3	CLEC16A	0.000303529	0.995999	0.617652	0.0624751	0.314081	0.714806	0.467994	0.280196	0.839115	0.286539	0.879468	0.879669	0.244637	0.796393	0.243938	0.329751	0.0697985	0.863462	0.246376	0.0531488	0.958025	0.443699	0.354328	0.50862	0.962555	0.752405	0.762011	0.969223	0.697465
Q14590	ZNF235	0.256944	0.969298	0.0143003	0.64793	0.162632	0.409	0.120745	0.818917	0.0809627	0.200575	0.415734	0.210417	0.527102	0.257957	0.374849	0.730247	0.653925	0.548964	0.058196	0.499689	0.721729	0.898131	0.340779	0.184464	0.423365	0.24845	0.327512	0.795376	0.857567
O00187	MASP2	0.660735	0.982073	0.502478	0.802791	0.853086	0.218993	0.761932	0.749025	0.778102	0.317388	0.818836	0.765179	0.0765604	0.297801	0.687832	0.0278519	0.736134	0.502824	0.880748	0.941913	0.350103	0.00378477	0.0110192	0.166296	0.360398	0.731218	0.615196	0.756266	0.205185
P54278	PMS2	0.56424	0.941067	0.581151	0.595562	0.145489	0.632507	0.0419147	0.000874241	0.21153	0.0128688	0.833229	0.787927	0.43616	0.485111	0.853147	0.570104	0.0168722	0.34396	0.935656	0.656686	0.503067	0.400499	0.423366	0.605692	0.76658	0.511583	0.305722	0.222536	0.694962
O76074	PDE5A	0.358499	0.953349	0.438306	0.365129	0.0134492	0.284322	0.209383	0.689869	0.587081	0.839441	0.000215198	0.455566	0.214948	0.883993	0.644522	0.373867	0.222732	0.368856	0.761853	0.529546	0.915954	0.00353274	0.282129	0.337045	0.952444	0.260788	0.565879	0.739264	0.519828
Q5SRE7	PHYHD1	0.923996	0.998896	0.630103	0.24075	0.231907	0.580461	0.238144	0.0993982	0.0715151	0.20171	0.28734	0.551924	0.754823	0.455803	0.987607	0.069297	0.740808	0.581014	0.422545	0.143599	0.452356	0.170196	0.833967	0.555246	0.211135	0.177493	0.843013	0.943263	0.838114
Q92854	SEMA4D	0.504504	0.953532	0.188803	0.761872	0.923599	0.0679416	0.246678	0.37705	0.124239	0.61986	0.793252	0.401007	0.584283	0.330866	0.935724	0.613976	0.539527	0.369785	0.0691941	0.1546	0.0441917	0.907098	0.704395	0.464672	0.378976	0.923288	0.146576	0.947515	0.25804
Q9BSG0	PRADC1	0.733041	0.949838	0.144482	0.578828	0.912947	0.0101505	0.632381	0.345101	0.640105	0.923616	0.421258	0.0765822	0.457624	0.263903	0.61572	0.271413	0.529296	0.510274	0.0148179	0.943307	0.338061	0.912536	0.416249	0.0440687	0.266773	0.800246	0.743465	0.906051	0.448088
O00505	KPNA3	0.672097	0.977148	0.719436	0.703509	0.10213	0.972864	0.24422	0.95216	0.694491	0.727787	0.963382	0.338357	0.111044	0.533534	0.256405	0.299308	0.166256	0.763148	0.50938	0.237383	0.867914	0.111508	0.18399	0.0478681	0.776716	0.122373	0.970402	0.530244	0.651984
Q9UBS0	RPS6KB2	9.86719e+06	1.02388e+07	7.9944e+06	3.9103e+06	7.89292e+06	6.12098e+06	6.70193e+06	395146	4.42427e+06	1.79821e+06	1.6604e+06	8.03208e+06	2.8841e+06	5.13743e+06	8.36559e+06	2.19242e+06	8.94399e+06	5.81764e+06	73577.7	294550	3.22924e+06	1.74136e+06	9.34556e+06	9.35038e+06	7.36339e+06	3.5087e+06	7.745e+06	5.21212e+06	9.59241e+06
Q6GTX8	LAIR1	0.282532	0.975031	0.130327	0.686393	0.151353	0.865046	0.654582	0.282956	0.611954	0.606413	0.493955	0.0401087	0.408193	0.207114	0.192227	0.917648	0.483174	0.140141	0.00253672	0.459132	0.943249	0.388966	0.223222	0.392142	0.434821	0.283307	0.859615	0.468011	0.363914
Q96RT1	ERBIN	0.887807	0.984713	0.401691	0.347159	0.59299	0.726703	0.2023	0.044902	0.351483	0.00523228	0.579399	0.826611	0.831774	0.932016	0.159508	0.685976	0.72082	0.447081	0.792829	0.173751	0.00397323	0.516961	0.429916	0.725957	0.638426	0.0762886	0.563689	0.64898	0.450956
Q99805	TM9SF2	7.85187	10.2336	8.68389	4.86636	6.43303	5.04426	3.35234	6.84482	2.13659	2.14732	1.17684	1.50764	2.98134	2.16991	1.69257	0.538905	1.64655	7.13713	7.93693	3.74437	2.17645	6.68675	6.98195	2.88543	2.28392	2.98758	4.25823	1.88371	1.27604
Q5T6V5	C9orf64	0.977626	0.996935	0.921126	0.363768	0.984663	0.954261	0.740644	0.925581	0.821541	0.985896	0.66397	0.167049	0.825575	0.164149	0.0989572	0.19406	0.666507	0.642354	0.0171799	0.567009	0.744537	0.198654	0.167367	0.973046	0.911236	0.313313	0.96373	0.0885515	0.275556
Q9UL18	AGO1	0.190543	0.992199	0.267984	0.581869	0.0619492	0.156484	0.360773	0.344889	0.820175	0.30077	0.560215	0.76537	0.219436	0.169255	0.306695	0.435269	0.454456	0.487101	0.435895	0.464706	0.188099	0.726482	0.860461	0.452771	0.694331	0.0384993	0.0595012	0.964798	0.212863
Q7L2J0	MEPCE	0.133173	0.988266	0.0542625	0.913005	0.729331	0.700302	0.0206346	0.576839	0.52554	0.203088	0.573525	0.120455	0.521322	0.114387	0.595778	0.802975	0.8674	0.612177	0.722669	0.595114	0.712724	0.174883	0.399829	0.157169	0.575268	0.748309	0.333233	0.128147	0.901922
Q9Y3D7	PAM16	0.70504	0.945143	0.712961	0.591432	0.297697	0.0290562	0.0798652	0.0100886	0.741294	0.537475	0.43676	0.658042	0.938756	0.218692	0.640973	0.415882	0.942241	0.3704	0.85069	0.226431	0.887363	0.00222624	0.53404	0.296898	0.499685	0.789028	0.253656	0.586675	0.823642
O60813	PRAMEF11	0.827557	0.982459	0.358093	0.484932	0.260185	0.089623	0.731916	0.186019	0.245617	0.701585	0.830276	0.345034	0.866366	0.441447	0.0297833	0.330668	0.70536	0.0212474	0.825109	0.0495562	0.768617	0.508077	0.285079	0.829754	0.263914	0.477037	0.763182	0.713318	0.90937
Q9NRF9	POLE3	0.66706	0.981343	0.933508	0.44229	0.677986	0.297445	0.497528	0.205896	0.511483	0.105542	0.48135	0.253596	0.676062	0.915349	0.64406	0.524049	0.276531	0.11059	0.775981	0.0915797	0.259651	0.744657	0.166568	0.834991	0.524355	0.18758	0.0901071	0.0968016	0.301853
O75155	CAND2	1.8691	2.1942	0.336393	0.962439	0.993715	0.178829	1.60677	0.464417	0.775844	0.757361	0.916632	0.367724	0.114023	0.0482019	0.963968	1.61913	0.824896	1.22527	0.422745	0.871077	0.315053	0.604755	2.05282	0.724042	0.761143	0.65806	0.709537	0.781058	0.887049
P56937	HSD17B7	0.469146	0.993536	0.713342	0.79896	0.908776	0.143907	0.133578	0.409639	0.591355	0.421125	0.6618	0.0991907	0.941522	0.616731	0.705121	0.499365	0.464049	0.58095	0.159176	0.0148136	0.208353	0.824496	0.399856	0.669826	0.28539	0.0228121	0.861123	0.637868	0.191049
Q86VX2	COMMD7	0.367437	0.960322	0.41273	0.581464	0.263793	0.827123	0.266632	0.578525	0.769978	0.566268	0.192563	0.278588	0.7394	0.467349	0.0735757	0.869456	0.081116	0.450384	0.545265	0.797858	0.828702	0.914501	0.895561	0.145417	0.0953452	0.142846	0.056211	0.439213	0.764531
Q9Y2J2	EPB41L3	7.11656	8.64236	3.52412	6.71325	3.02863	2.59959	4.11746	3.70688	0.57165	2.1345	2.44574	1.76466	2.35081	1.04679	1.2248	0.762429	1.17739	6.79088	3.69432	2.03358	2.70382	4.05093	5.12664	2.93155	2.01674	2.01556	2.44453	1.47565	1.13519
Q99808	SLC29A1	0.117489	0.980992	0.248249	0.522577	0.122763	0.898109	0.383111	0.685012	0.0605574	0.137317	0.0965702	0.686458	0.710453	0.482616	0.584753	0.0439776	0.820693	0.47811	0.87064	0.424865	0.193598	0.249733	0.551492	0.484176	0.940201	0.640701	0.409381	0.838695	0.313753
P14678	SNRPB	0.787452	0.982696	0.216898	0.0205704	0.214315	0.219961	0.565812	0.141848	0.681794	0.743125	0.876734	0.504304	0.52949	0.522775	0.982039	0.62814	0.508601	0.691268	0.373925	0.587132	0.723617	0.0359239	0.42551	0.0274188	0.485471	0.529593	0.233091	0.943082	0.17946
O95999	BCL10	0.682579	0.950308	0.614259	0.0215454	0.235029	0.277088	0.526385	0.939085	0.299833	0.64627	0.668241	0.742645	0.54926	0.263239	0.690226	0.495248	0.884918	0.532995	0.155968	0.229896	0.274694	0.127677	0.913632	0.370097	0.874543	0.840529	0.365578	0.013005	0.164913
P17025	ZNF182	0.589058	0.97679	0.182764	0.576282	0.262596	0.116588	0.855629	0.534337	0.40931	0.0603209	0.919578	0.225008	0.294546	0.844168	0.508394	0.629004	0.319252	0.0978017	0.627025	0.779753	0.682424	0.257103	0.847779	0.511485	0.00481816	0.237663	0.39393	0.248827	0.568794
Q10472	GALNT1	0.124426	0.992477	0.0878559	0.105504	0.239385	0.19034	0.62501	0.831214	0.119624	0.338631	0.850385	0.963941	0.0590911	0.661252	0.508014	0.223378	0.936653	0.379285	0.671389	0.403014	0.781997	0.701109	0.459876	0.261754	0.703253	0.287317	0.320713	0.371644	0.544974
Q9UNQ2	DIMT1	0.135164	0.988456	0.019497	0.705777	0.166969	0.511889	0.259835	0.779273	0.644178	0.878578	0.639396	0.555714	0.988067	0.0491163	0.956407	0.290502	0.244723	0.495427	0.336313	0.561946	0.921281	0.95319	0.259049	0.933992	0.2042	0.734885	0.547329	0.507987	0.154275
P33908	MAN1A1	0.841144	0.969923	0.327371	0.137725	0.283703	0.183232	0.880088	0.477019	0.958701	0.321965	0.366783	0.319405	0.0602394	0.504175	0.864438	0.842019	0.329545	0.443653	0.325579	0.57196	0.731678	0.215947	0.151393	0.0708449	0.346811	0.0883396	0.553875	0.567906	0.395864
O75787	ATP6AP2	0.167131	0.960264	0.688594	0.0294896	0.830618	0.21259	0.694903	0.297618	0.142266	0.89651	0.177773	0.791548	0.821694	0.871483	0.222411	0.594204	0.371614	0.236831	0.690414	0.739243	0.661858	0.46339	0.471556	0.337152	0.926619	0.0227951	0.806559	0.197763	0.597639
Q8TEH3	DENND1A	0.247869	0.981426	0.108741	0.792156	0.578871	0.326513	0.601894	0.262426	0.389611	0.0298963	0.905413	0.231518	0.578402	0.845371	0.500997	0.0345592	0.593438	0.189891	0.54719	0.526656	0.393738	0.839413	0.449778	0.947953	0.737417	0.729157	0.025211	0.888542	0.78627
O00268	TAF4	0.347494	0.960795	0.522016	0.097111	0.58446	0.167599	0.553645	0.882204	0.216261	0.430605	0.856401	0.232368	0.865959	0.368962	0.848286	0.073099	0.901123	0.0329833	0.767716	0.319739	0.282548	0.919609	0.480238	0.754764	0.178164	0.278352	0.275468	0.655538	0.360053
P06729	CD2	0.700749	0.944244	0.196262	0.539239	0.654671	0.29245	0.289029	0.841209	0.503598	0.143868	0.411646	0.0784591	0.881094	0.48315	0.0453063	0.450055	0.493383	0.728275	0.757671	0.304596	0.243462	0.156921	0.383117	0.0164821	0.421555	0.775174	0.75069	0.257796	0.29681
Q15742	NAB2	0.896177	0.98318	0.300277	0.492787	0.286995	0.81507	0.400019	0.0827787	0.044714	0.550302	0.725268	0.516495	0.29881	0.118576	0.664868	0.448434	0.731431	0.125409	0.828691	0.298576	0.0135503	0.68659	0.675065	0.303342	0.396464	0.774225	0.63474	0.275059	0.96955
P00325	ADH1B	0.373179	0.990095	0.670485	0.473679	0.17464	0.278955	0.840884	0.0572768	0.166941	0.594526	0.92285	0.452759	0.526834	0.673468	0.542066	0.775329	0.518059	0.832207	0.0624262	0.899409	0.219021	0.807066	0.434261	0.174306	0.615057	0.405935	0.0509479	0.794029	0.129957
Q9UNN5	FAF1	5.1944	8.68649	5.75354	2.96617	3.91881	4.53297	2.75941	3.14529	1.11278	2.94455	1.38853	0.857102	2.32318	2.61144	1.26227	0.769105	0.695839	7.40593	3.59699	2.47303	0.667378	4.19537	4.62302	2.35316	2.46985	2.48565	2.27473	3.03026	1.35529
Q9NUD5	ZCCHC3	706681	1.50008e+06	1.49631e+06	200895	390796	964365	931123	889774	425585	437224	1.07564e+06	868243	797159	1.31894e+06	1.41431e+06	433959	718793	151530	1.19693e+06	513421	1.35571e+06	574.072	84222.1	564088	338185	457315	702108	498316	841604
Q2M389	WASHC4	0.811046	0.983024	0.04685	0.461425	0.450426	0.751692	0.0784445	0.11022	0.70161	0.161744	0.770244	0.466324	0.926271	0.224459	0.460236	0.264817	0.480721	0.363099	0.310906	0.740489	0.539081	0.0903981	0.800504	0.34083	0.6648	0.0740228	0.688735	0.714619	0.387713
Q9NVX7	KBTBD4	0.944244	0.9656	0.507998	0.15748	0.492452	0.126434	0.452151	0.43874	0.843258	0.255895	0.93938	0.806824	0.856374	0.763206	0.236855	0.526645	0.336839	0.419334	0.89592	0.639613	0.735719	0.853408	0.870151	0.639611	0.000422816	0.194356	0.478916	0.0904918	0.0917548
Q8IWE5	PLEKHM2	0.78599	0.986308	0.232	0.860463	0.586996	0.347699	0.265357	0.158053	0.362405	0.517832	0.840716	0.887497	0.355829	0.977589	0.926813	0.526821	0.352748	0.143915	0.152617	0.756146	0.245814	0.0940215	0.389003	0.154329	0.645019	0.0576719	0.586653	0.761032	0.931737
P36959	GMPR	0.873628	0.88666	0.321338	0.242802	0.520512	0.566061	0.30453	0.363847	0.704761	0.67488	0.794599	0.235309	0.655393	0.617486	0.12451	0.532345	0.613566	0.202	0.726145	0.680264	0.110537	0.153961	0.088372	0.19962	0.701264	0.295481	0.00339659	0.752691	0.877522
Q07864	POLE	0.380283	0.939764	0.558355	0.172867	0.223048	0.331414	0.558436	0.329219	0.317118	0.873337	0.108192	0.667267	0.829516	0.215853	0.558309	0.432091	0.297225	0.619671	0.358867	0.41888	0.660371	0.126555	0.198832	0.125946	0.100891	0.849859	0.750512	0.0822303	0.871909
Q6UXV4	APOOL	0.192109	0.886554	0.0446334	0.353994	0.809233	0.758378	0.62856	0.0626004	0.480265	0.268464	0.189396	0.104778	0.753566	0.670742	0.119846	0.354753	0.667812	0.172162	0.542353	0.48763	0.295729	0.421052	0.198858	0.830529	0.862071	0.875626	0.334203	0.512941	0.393449
Q9NYY8	FASTKD2	0.708031	0.953795	0.609802	0.407598	0.441903	0.448582	0.952819	0.801634	0.674315	0.918285	0.243598	0.664838	0.405134	0.834892	0.506353	0.164999	0.239282	0.611667	0.0372097	0.29558	0.526067	0.0164748	0.572653	0.245234	0.602657	0.431121	0.607891	0.0133932	0.174526
O75061	DNAJC6	0.585057	0.988422	0.341284	0.641504	0.159748	0.818822	0.893657	0.903028	0.939981	0.0797991	0.543093	0.650971	0.318243	0.442789	0.625809	0.875092	0.203215	0.272423	0.0925245	0.707231	0.869961	0.920312	0.885169	0.168651	0.1831	0.893531	0.517748	0.640641	0.005471
Q12986	NFX1	0.0230535	0.973044	0.493628	0.726483	0.803442	0.684444	0.00502635	0.855277	0.0977693	0.741359	0.339296	0.431586	0.451067	0.657444	0.494609	0.657638	0.78753	0.286482	0.960058	0.706713	0.476123	0.381829	0.0286827	0.867734	0.932257	0.581254	0.181955	0.483299	0.292653
Q96S06	LMF1	0.0265756	0.966905	0.337343	0.863203	0.0335667	0.288857	0.214906	0.804441	0.8004	0.482293	0.375645	0.866334	0.795309	0.0334428	0.621325	0.504992	0.706277	0.56805	0.378438	0.84244	0.145435	0.90616	0.263813	0.883699	0.248453	0.541497	0.310772	0.584443	0.537057
P30203	CD6	0.388946	0.979349	0.571337	0.10119	0.905443	0.850085	0.196584	0.339138	0.494295	0.960411	0.645921	0.797587	0.761071	0.416883	0.387294	0.278124	0.650054	0.214012	0.659517	0.253955	0.182162	0.627508	0.760332	0.284367	0.149841	0.736318	0.0365737	0.770475	0.0659491
O43312	MTSS1	0.418996	0.982551	0.42601	0.460607	0.320071	0.110608	0.224539	0.237512	0.287589	0.465564	0.0522444	0.786913	0.392549	0.234347	0.197986	0.186215	0.555409	0.306491	0.00217703	0.22705	0.114203	0.378647	0.553191	0.379522	0.298249	0.371934	0.7686	0.637723	0.589047
Q9Y5K8	ATP6V1D	4.80671	6.18101	3.93098	5.81589	4.45936	2.22766	2.64577	2.28901	1.18932	1.54094	1.3208	0.672511	1.54775	1.47476	0.760937	1.09577	1.11963	4.592	3.96648	2.6372	1.32381	4.17626	4.22229	1.94146	1.41359	1.94818	2.39098	1.03776	0.994912
Q8IVI9	NOSTRIN	0.381233	0.948824	0.854379	0.233849	0.269933	0.926484	0.163351	0.143554	0.0667367	0.886784	0.339338	0.0688813	0.913342	0.482315	0.603083	0.934474	0.605907	0.801196	0.498681	0.519954	0.805287	0.446848	0.881785	0.399602	0.36334	0.281245	0.126664	0.189097	0.756913
P49789	FHIT	0.148241	0.992083	0.691883	0.509984	0.411259	0.879412	0.863765	0.944714	0.888321	0.461012	0.923988	0.111332	0.898205	0.0848398	0.77631	0.527055	0.205774	0.232739	0.205892	0.872455	0.87937	0.105303	0.232823	0.2073	0.208828	0.793035	0.571711	0.803241	0.537049
Q99685	MGLL	0.730672	0.987539	0.256169	0.542958	0.939776	0.332031	0.212213	0.416666	0.979752	0.150615	0.510375	0.362483	0.648031	0.290327	0.730151	0.541239	0.311445	0.0509811	0.636031	0.626298	0.555692	0.0250375	0.263295	0.969718	0.46107	0.286153	0.0709866	0.830378	0.582754
Q92485	SMPDL3B	0.846189	0.873099	0.438533	0.361446	0.707033	0.276987	0.127154	0.249865	0.360427	0.54338	0.598289	0.395493	0.734672	0.806157	0.34875	0.564583	0.292657	0.607292	0.272128	0.0196485	0.387073	0.438737	0.641091	0.638508	0.0261875	0.164884	0.0516025	0.228762	0.66143
O95613	PCNT	0.898373	0.986327	0.460142	0.985758	0.394845	0.870869	0.172901	0.835435	0.390844	0.0488522	0.869871	0.485669	0.50938	0.360136	0.602339	0.6478	0.961812	0.338204	0.538605	0.0627529	0.725196	0.912786	0.86051	0.371374	0.101753	0.280833	0.824443	0.0227121	0.775977
Q9Y5S1	TRPV2	0.250471	0.9479	0.69722	0.544303	0.914915	0.0391079	0.648591	0.650056	0.886901	0.914734	0.607565	0.397406	0.598868	0.733176	0.774193	0.164995	0.479856	0.556195	0.923276	0.0231818	0.226951	0.407255	0.052359	0.545987	0.804804	0.0658743	0.361289	0.460815	0.582882
Q14938	NFIX	0.77096	0.947919	0.44381	0.351026	0.114792	0.599866	0.0386134	0.401255	0.697162	0.177613	0.348841	0.109079	0.621881	0.256048	0.458936	0.809222	0.397944	0.647376	0.198029	0.872758	0.438735	0.769128	0.532817	0.88353	0.0741017	0.499104	0.116352	0.435025	0.306684
A6NP11	ZNF716	0.0133534	0.933256	0.373277	0.251462	0.64241	0.360781	0.485303	0.366243	0.846871	0.626626	0.181247	0.57624	0.056139	0.504235	0.756713	0.671219	0.413613	0.470798	0.58806	0.174866	0.431356	0.295429	0.298036	0.310632	0.832925	0.925425	0.0543281	0.209075	0.769242
Q5TAA0	TTC22	0.888019	0.926524	0.0452371	0.722298	0.266394	0.619476	0.305755	0.0572167	0.882272	0.805783	0.478957	0.276861	0.080968	0.71604	0.568224	0.869697	0.189454	0.203459	0.88407	0.0714743	0.902016	0.715652	0.6745	0.890369	0.81564	0.579437	0.376516	0.909336	0.822972
P60604	UBE2G2	0.305649	0.995114	0.194212	0.109732	0.886173	0.885176	0.209871	0.614004	0.558286	0.943331	0.077989	0.824376	0.164521	0.147983	0.568948	0.855716	0.0927506	0.609857	0.846791	0.8986	0.254428	0.27937	0.298621	0.76126	0.844788	0.391254	0.655342	0.716665	0.648535
Q8IWA5	SLC44A2	0.863363	0.983948	0.968271	0.779728	0.704694	0.180476	0.583866	0.760233	0.331972	0.703041	0.579152	0.382486	0.866054	0.920214	0.54747	0.866127	0.568297	0.835662	0.633121	0.657335	0.775341	0.030559	0.0405972	0.163017	0.579185	0.884928	0.0216471	0.648059	0.0612262
A1L4H1	SSC5D	0.322586	0.985849	0.501294	0.37716	0.270443	0.654009	0.75431	0.306166	0.126864	0.284658	0.831214	0.823842	0.0653612	0.0408385	0.640652	0.49189	0.969027	0.567243	0.108183	0.399219	0.703488	0.104934	0.451936	0.640216	0.304052	0.635686	0.671886	0.27713	0.290873
O95671	ASMTL	0.613976	0.94075	0.937454	0.833736	0.133143	0.0846043	0.669356	0.875606	0.504443	0.76455	0.676061	0.128389	0.60378	0.887262	0.532912	0.0307766	0.335366	0.669458	0.762357	0.31447	0.420906	0.0563241	0.323739	0.206898	0.530262	0.738526	0.898933	0.255736	0.855165
Q9Y2I6	NINL	0.642725	0.982699	0.224545	0.649672	0.343681	0.741513	0.314996	0.783476	0.020302	0.458378	0.863753	0.903605	0.919828	0.635069	0.750261	0.069035	0.70676	0.745349	0.0757831	0.798452	0.154812	0.289126	0.0675191	0.455856	0.899996	0.592181	0.682333	0.981774	0.856742
A6NKH3	RPL37AP8	0.149224	0.97141	0.724194	0.654939	0.421865	0.531373	0.410163	0.318075	0.565286	0.745449	0.571487	0.926804	0.734781	0.465367	0.478515	0.534204	0.216071	0.276777	0.62591	0.93071	0.0800054	0.210855	0.111236	0.0514589	0.744955	0.773287	0.486232	0.332114	0.0418605
P61326	MAGOH	0.780016	0.935403	0.0486125	0.61466	0.0874442	0.817358	0.79223	0.860012	0.478575	0.777631	0.773242	0.40919	0.360485	0.0345544	0.276508	0.866253	0.157403	0.461551	0.855535	0.925913	0.220555	0.185108	0.428331	0.678844	0.741936	0.239588	0.808695	0.419268	0.367902
Q9NUM4	TMEM106B	0.483075	0.959447	0.867034	0.482445	0.950542	0.519969	0.588223	0.948543	0.0328897	0.537005	0.550375	0.61344	0.778922	0.870587	0.338274	0.298198	0.0479968	0.280481	0.200073	0.351398	0.542279	0.6992	0.829255	0.432337	0.516466	0.18533	0.689716	0.0156385	0.255514
Q86VW2	ARHGEF25	0.739518	0.991081	0.278674	0.0903939	0.803055	0.317562	0.343187	0.282105	0.624376	0.568688	0.98614	0.333376	0.963998	0.556578	0.217393	0.0261553	0.241955	0.181116	0.575902	0.927091	0.693692	0.667758	0.962388	0.985951	0.309558	0.615062	0.976233	0.138693	0.696395
Q969R2	OSBP2	0.622645	0.965921	0.567175	0.478463	0.376868	0.232992	0.437738	0.410079	0.855411	0.954881	0.450625	0.439012	0.276658	0.636622	0.26475	0.642229	0.0253353	0.699313	0.854769	0.463023	0.0892626	0.175931	0.246421	0.577212	0.959188	0.274133	0.709565	0.037887	0.931858
Q8NI22	MCFD2	0.294621	0.982489	0.808017	0.130078	0.0906186	0.613514	0.237512	0.430743	0.2118	0.342054	0.339914	0.943967	0.55337	0.622849	0.504075	0.776538	0.588058	0.703832	0.808164	0.714255	0.333402	0.135265	0.473529	0.0925441	0.0276353	0.944241	0.72005	0.529444	0.75991
Q96T17	MAP7D2	0.987233	0.992789	0.203739	0.274691	0.450708	0.0861881	0.565097	0.617364	0.834224	0.763651	0.270004	0.312635	0.265898	0.139184	0.697079	0.620367	0.3578	0.133131	0.125108	0.630839	0.729575	0.121311	0.69506	0.110433	0.585534	0.441965	0.740684	0.551769	0.729573
Q7RTP0	NIPA1	0.351655	0.962016	0.672895	0.627958	0.0203326	0.767069	0.777349	0.704341	0.0945306	0.595348	0.0869054	0.667558	0.797317	0.329591	0.81921	0.584228	0.724309	0.635189	0.493092	0.824188	0.541549	0.265725	0.198214	0.593608	0.0123813	0.385284	0.338312	0.708715	0.187435
Q9UJA3	MCM8	0.573514	0.977373	0.792813	0.747687	0.958594	0.490825	0.436972	0.0425199	0.188083	0.958663	0.602405	0.0734875	0.0210686	0.71348	0.48024	0.255902	0.708802	0.76418	0.194188	0.866548	0.447195	0.429348	0.156385	0.924917	0.445975	0.931111	0.439063	0.615173	0.815637
Q14689	DIP2A	0.878236	0.933123	0.843657	0.665418	0.683419	0.381798	0.344799	0.417358	0.810995	0.463105	0.399715	0.457159	0.0456557	0.000288017	0.244643	0.532699	0.377709	0.432252	0.0555831	0.28246	0.569575	0.401324	0.134294	0.355533	0.558247	0.203532	0.55082	0.718223	0.307621
Q92830	KAT2A	0.547129	0.988467	0.683458	0.701747	0.926425	0.969006	0.731601	0.308911	0.61785	0.0733007	0.760257	0.773208	0.710326	0.222642	0.64483	0.866084	0.629449	0.0888706	0.270832	0.867459	0.0200996	0.934701	0.189202	0.552487	0.15999	0.672976	0.481854	0.165321	0.852784
Q99983	OMD	0.665525	0.965835	0.320375	0.229244	0.0789892	0.540208	0.357329	0.772576	0.0744865	0.448452	0.44841	0.299417	0.962908	0.0424067	0.762437	0.367	0.878937	0.422416	0.758421	0.458682	0.361708	0.83366	0.0524312	0.502163	0.649892	0.315641	0.494841	0.267194	0.602198
Q16798	ME3	0.459854	0.935058	0.30116	0.702423	0.599649	0.606853	0.460127	0.254122	0.0797486	0.681437	0.578865	0.335333	0.346982	0.546406	0.489905	0.0451934	0.493601	0.336297	0.732297	0.814567	0.083573	0.27889	0.0061422	0.583042	0.501937	0.110597	0.514166	0.320255	0.399818
Q8WXD5	GEMIN6	0.520368	0.994189	0.0824006	0.900643	0.862203	0.120617	0.877779	0.464486	0.119988	0.133835	0.494403	0.352689	0.26913	0.382911	0.37645	0.0509333	0.619428	0.840153	0.801353	0.736997	0.905738	0.766315	0.549127	0.690037	0.59224	0.307294	0.629561	0.527952	0.141027
Q9UBG3	CRNN	4.48849	6.85101	2.98363	4.13588	3.90598	1.54918	1.85042	1.7907	0.548759	3.0872	2.20294	3.07309	1.37561	1.91498	0.663674	0.907333	0.773248	5.02061	6.50839	3.98303	1.60496	4.23394	1.60926	4.06784	2.94611	3.55841	4.40819	1.74097	1.15696
P21695	GPD1	0.196271	0.979628	0.4027	0.558143	0.673087	0.0159233	0.677922	0.686047	0.89041	0.433213	0.292586	0.778198	0.552719	0.223282	0.88589	0.157369	0.344851	0.601978	0.853314	0.235103	0.625813	0.345494	0.670058	0.971839	0.0367614	0.66114	0.236127	0.29798	0.918198
Q5JV73	FRMPD3	0.920001	0.993881	0.574643	0.361053	0.257669	0.618454	0.135307	0.323996	0.564126	0.804645	0.435968	0.500471	0.10644	0.085204	0.186383	0.617717	0.296144	0.27401	0.267629	0.214193	0.76027	0.71927	0.575822	0.892727	0.804654	0.94265	0.118349	0.656852	0.303507
Q9UN66	PCDHB8	0.0331281	0.952843	0.0248169	0.816169	0.902279	0.467864	0.239813	0.293014	0.436729	0.344631	0.582604	0.343551	0.806316	0.627938	0.644428	0.899207	0.491752	0.570165	0.56167	0.528585	0.718787	0.530208	0.0348189	0.322459	0.35566	0.435301	0.509463	0.0801716	0.445824
Q9UJP4	KLHL21	0.49948	0.996546	0.4945	0.792983	0.203248	0.179222	0.792533	0.41832	0.891777	0.505155	0.172316	0.134582	0.193405	0.361298	0.643854	0.65796	0.215311	0.993102	0.782348	0.306973	0.837406	0.606544	0.298001	0.432479	0.104981	0.88002	0.141111	0.781933	0.315967
A1L020	MEX3A	0.445627	0.93482	0.0999769	0.515719	0.849373	0.215732	0.140355	0.182294	0.782016	0.898675	0.910558	0.3474	0.521845	0.189679	0.431097	0.567254	0.15595	0.426547	0.401589	0.329686	0.687399	0.178172	0.704323	0.464772	0.303623	0.590369	0.329574	0.154742	0.160109
A0JNW5	UHRF1BP1L	0.2085	0.959432	0.907375	0.215744	0.817334	0.83533	0.940579	0.540595	0.760707	0.693402	0.935152	0.622681	0.0890383	0.956273	0.00720394	0.473979	0.127621	0.553691	0.739102	0.297509	0.566803	0.774185	0.594583	0.471383	0.137826	0.19647	0.660142	0.830761	0.361445
Q19T08	ECSCR	0.698134	0.906218	0.588016	0.600701	0.070307	0.862108	0.753242	0.371012	0.82475	0.0809092	0.319132	0.482973	0.845913	0.823967	0.0568425	0.880074	0.65038	0.362373	0.246956	0.426106	0.817214	0.374838	0.173472	0.256249	0.348384	0.817489	0.602888	0.385912	0.144779
Q7L2R6	ZNF765	0.446736	0.943597	0.186613	0.430806	0.790478	0.290739	0.100209	0.342854	0.730315	0.894249	0.52493	0.270866	0.483288	0.327927	0.514053	0.273066	0.495706	0.940652	0.810628	0.608237	0.0136116	0.655319	0.449623	0.869002	0.498528	0.400437	0.332915	0.725678	0.0136704
O94779	CNTN5	0.00725746	0.983077	0.152582	0.199341	0.574462	0.415191	0.461225	0.326446	0.868273	0.790116	0.232249	0.827526	0.760465	0.442528	0.860376	0.402583	0.321282	0.542444	0.605547	0.629006	0.0588328	0.425593	0.328117	0.893088	0.560474	0.27249	0.517363	0.180382	0.320761
Q95365	Q95365	0.171332	0.95657	0.273718	0.703498	0.60962	0.197824	0.58952	0.277821	0.623152	0.210818	0.423446	0.297921	0.727602	0.924016	0.140494	0.756083	0.543534	0.632235	0.44006	0.377498	0.0966821	0.825321	0.437582	0.168957	0.0269975	0.279687	0.726177	0.58243	0.706459
Q9BYB4	GNB1L	0.118974	0.898769	0.0982791	0.861852	0.011552	0.371121	0.551477	0.126816	0.531553	0.282894	0.624549	0.0716825	0.653466	0.354529	0.417689	0.809158	0.686221	0.827788	0.520925	0.563673	0.697343	0.301732	0.325387	0.516023	0.400083	0.606129	0.508003	0.823546	0.256821
Q86WQ0	NR2C2AP	0.0468842	0.952249	0.735852	0.231323	0.41253	0.782941	0.108474	0.298845	0.843536	0.820124	0.100233	0.496318	0.847615	0.859247	0.502061	0.498204	0.173286	0.558494	0.853817	0.425784	0.70119	0.110562	0.450348	0.876674	0.266975	0.477755	0.94454	0.368941	0.501981
Q12894	IFRD2	0.69529	0.973716	0.812491	0.397813	0.367794	0.484819	0.111986	0.780217	0.0320295	0.637687	0.106823	0.567573	0.695715	0.923981	0.819789	0.76954	0.240284	0.354735	0.924626	0.188574	0.691922	0.310478	0.417912	0.956041	0.681455	0.160471	0.504041	0.188988	0.757575
Q8N128	FAM177A1	0.263411	0.962264	0.582113	0.782515	0.746255	0.420391	0.472646	0.57064	0.812487	0.911108	0.956538	0.518673	0.353044	0.138136	0.341333	0.294451	0.590687	0.515809	0.0446796	0.203723	0.959535	0.531585	0.478461	0.475703	0.365458	0.103576	0.8711	0.722411	0.0478687
Q2TV78	MST1L	0.161896	0.968732	0.890538	0.653598	0.900436	0.430248	0.843055	0.21032	0.0336274	0.0830041	0.718798	0.214824	0.637228	0.86264	0.389874	0.0460871	0.894949	0.843946	0.619728	0.69532	0.512758	0.960092	0.300811	0.609426	0.466776	0.442781	0.942216	0.684974	0.856425
Q14409	GK3P	0.630434	0.97188	0.839608	0.541063	0.918897	0.637142	0.536702	0.352441	0.88038	0.247918	0.0704144	0.698662	0.948613	0.475334	0.920084	0.345624	0.0786758	0.756464	0.713752	0.645398	0.518789	0.19405	0.395297	0.0982717	0.56204	0.805596	0.132439	0.443083	0.174254
O60476	MAN1A2	0.358674	0.980564	0.214295	0.541257	0.67345	0.152366	0.511655	0.795499	0.296066	0.61489	0.278909	0.916046	0.956286	0.595448	0.541569	0.666198	0.596219	0.970097	0.33476	0.734209	0.111665	0.366072	0.25602	0.888794	0.0460249	0.367366	0.189052	0.219703	0.751131
Q8NEN9	PDZD8	0.5794	0.993864	0.965886	0.0766715	0.712885	0.593867	0.883268	0.351944	0.858566	0.195567	0.0106321	0.0955425	0.573365	0.960947	0.596276	0.279336	0.568883	0.753576	0.531368	0.515334	0.2488	0.884923	0.372843	0.632341	0.629405	0.150506	0.651889	0.780603	0.418981
A6NDR6	MEIS3P1	0.605005	0.940562	0.925503	0.626801	0.930747	0.853704	0.582182	0.923948	0.0158714	0.848345	0.14036	0.318392	0.59247	0.863416	0.915866	0.428735	0.395316	0.0167113	0.602376	0.822527	0.73707	0.642262	0.433176	0.178868	0.693713	0.603542	0.23318	0.18119	0.495911
Q9BY11	PACSIN1	0.135598	0.957638	0.929899	0.0633904	0.404379	0.889198	0.661389	0.741775	0.948571	0.699088	0.660311	0.324936	0.610208	0.276918	0.626085	0.231337	0.76238	0.795145	0.213295	0.436303	0.346975	0.553258	0.945401	0.186859	0.0843156	0.260026	0.47236	0.313895	0.724632
Q07817	BCL2L1	0.94679	0.996859	0.243872	0.0829471	0.509207	0.774246	0.246395	0.659698	0.436202	0.989553	0.347431	0.687425	0.363783	0.61337	0.883305	0.779597	0.778837	0.939427	0.984522	0.89294	0.664702	0.660259	0.326455	0.839398	0.0355904	0.0726727	0.715277	0.945763	0.150912
O75052	NOS1AP	0.927583	0.970112	0.771569	0.522218	0.960974	0.365597	0.692387	0.255804	0.942547	0.665715	0.424139	0.431529	0.664335	0.250316	0.329006	0.798832	0.0988638	0.937589	0.182442	0.908219	0.603807	0.0870174	0.384898	0.116081	0.725099	0.105667	0.824523	0.763199	0.688462
Q6DT37	CDC42BPG	0.327073	0.998421	0.227546	0.615055	0.226432	0.486056	0.835451	0.174025	0.240029	0.311515	0.87174	0.425474	0.53997	0.435019	0.878471	0.182594	0.205979	0.69461	0.213307	0.88833	0.835283	0.182989	0.640154	0.70175	0.645523	0.824161	0.0555831	0.578978	0.90656
Q86VW0	SESTD1	0.161647	0.952435	0.393723	0.704102	0.914222	0.854335	0.163477	0.712423	0.517721	0.152766	0.23346	0.0938668	0.560706	0.723185	0.713148	0.804963	0.379236	0.127393	0.881666	0.399714	0.245293	0.548641	0.617501	0.412102	0.291727	0.792209	0.812172	0.144018	0.437698
Q96P50	ACAP3	0.56275	0.98957	0.930504	0.0873232	0.835888	0.339117	0.610975	0.60257	0.125514	0.252517	0.693408	0.905855	0.305024	0.491526	0.561329	0.568505	0.478117	0.342619	0.548461	0.126654	0.46009	0.117387	0.983979	0.633692	0.440824	0.88318	0.0648133	0.45044	0.434409
Q96SR6	ZNF382	0.655052	0.958319	0.252901	0.608723	0.635527	0.903326	0.416648	0.171841	0.474676	0.647675	0.835967	0.637566	0.0404937	0.7262	0.179035	0.517398	0.549064	0.528004	0.404731	0.704295	0.795883	0.237541	0.159261	0.0553753	0.723761	0.108925	0.381231	0.471444	0.674518
Q969Y2	GTPBP3	0.901855	0.964437	0.211152	0.497792	0.294469	0.0510265	0.331222	0.747808	0.635978	0.00472345	0.523177	0.735925	0.480559	0.699503	0.564572	0.507543	0.819052	0.567154	0.758517	0.723173	0.0398005	0.786549	0.841391	0.263047	0.880572	0.288162	0.904532	0.40214	0.753726
Q7Z3E5	ARMC9	0.0854635	0.984076	0.520158	0.943579	0.490376	0.525079	0.283359	0.327131	0.768656	0.313713	0.757872	0.270644	0.575648	0.548496	0.854151	0.322161	0.147309	0.228958	0.762108	0.867077	0.643649	0.0954323	0.938788	0.199825	0.212063	0.860061	0.840959	0.87184	0.915208
Q9Y4B4	RAD54L2	0.592185	0.990004	0.854488	0.821608	0.579435	0.453513	0.826989	0.78014	0.740415	0.194171	0.0914612	0.641498	0.264949	0.0377986	0.332498	0.868502	0.792406	0.677016	0.827793	0.209253	0.187525	0.500021	0.842751	0.817679	0.472128	0.0956963	0.829275	0.769102	0.272653
Q9HBM0	VEZT	0.88608	0.930585	0.636431	0.857271	0.716914	0.526131	0.855864	0.427423	0.839413	0.854031	0.263552	0.836222	0.745008	0.154035	0.246949	0.283186	0.208517	0.148894	0.416734	0.77468	0.166893	0.445497	0.429043	0.853036	0.554718	0.728512	0.0972921	0.0831685	0.661545
Q9Y5Y5	PEX16	0.632382	0.972438	0.673874	0.807535	0.306862	0.647662	0.0271128	0.242216	0.131383	0.844171	0.139718	0.83709	0.504378	0.483181	0.491478	0.521571	0.801388	0.607576	0.788936	0.782319	0.411814	0.320921	0.00870036	0.877041	0.534928	0.272137	0.76147	0.512043	0.856753
P30154	PPP2R1B	0.377855	0.936143	0.797655	0.486644	0.108541	0.539404	0.593127	0.332521	0.631485	0.66325	0.506373	0.104665	0.0337433	0.772336	0.631342	0.620614	0.770093	0.188641	0.189383	0.469224	0.430244	0.428741	0.0195698	0.623256	0.381386	0.748892	0.854381	0.544227	0.684189
Q86U70	LDB1	0.635009	0.999546	0.0417008	0.421264	0.811401	0.374698	0.44188	0.486355	0.290365	0.233881	0.174957	0.860349	0.397328	0.112483	0.840777	0.331915	0.574522	0.871593	0.733342	0.585178	0.683593	0.79164	0.992914	0.937359	0.525869	0.0210117	0.625538	0.898892	0.669015
Q86TC9	MYPN	0.190595	0.884856	0.763841	0.608526	0.444803	0.781065	0.077917	0.54713	0.216715	0.788852	0.686078	0.0456788	0.176478	0.598324	0.503147	0.440318	0.431994	0.268076	0.806139	0.761653	0.620912	0.385351	0.694637	0.370499	0.40869	0.772832	0.648964	0.0764743	0.184554
Q96FH0	BORCS8	0.254014	0.98058	0.873039	0.68772	0.363097	0.0334837	0.96513	0.8146	0.77911	0.0698478	0.313476	0.587354	0.588569	0.974785	0.811042	0.434604	0.910427	0.550403	0.457895	0.9258	0.875369	0.378429	0.354293	0.46045	0.300717	0.365742	0.153207	0.753211	0.218108
Q8N108	MIER1	0.394157	0.92578	0.224143	0.669472	0.0680761	0.461925	0.790637	0.448199	0.481233	0.216397	0.449141	0.79504	0.283489	0.0852419	0.214649	0.738481	0.616265	0.761029	0.403582	0.0497676	0.323389	0.617611	0.251423	0.394548	0.539038	0.87705	0.710065	0.849652	0.40234
Q6P1R3	MSANTD2	0.397844	0.991922	0.965615	0.417407	0.694916	0.754964	0.165081	0.316973	0.688643	0.192881	0.402427	0.233525	0.430678	0.0717218	0.212455	0.259739	0.501635	0.664245	0.461347	0.371388	0.0800548	0.375111	0.685648	0.448171	0.308763	0.957052	0.361921	0.312805	0.732954
Q9Y6W8	ICOS	0.547472	0.967737	0.898896	0.542905	0.35011	0.293127	0.102931	0.84399	0.627002	0.701863	0.451972	0.548249	0.696684	0.443573	0.454233	0.196348	0.509443	0.269361	0.183534	0.0676302	0.803564	0.116464	0.179125	0.391224	0.755475	0.763293	0.93169	0.938198	0.554117
P04908	H2AC4	0.836737	0.895212	0.527116	0.791685	0.868325	0.450679	0.546112	0.421646	0.597675	0.291591	0.607826	0.31808	0.461768	0.332703	0.656399	0.124536	0.292169	0.726158	0.517972	0.703458	0.0535651	0.490496	0.46612	0.258622	0.316346	0.129077	0.27826	0.375628	0.0186766
Q9H2D1	SLC25A32	0.901478	0.943307	0.569991	0.90741	0.360093	0.422857	0.413795	0.428288	0.862147	0.715947	0.739234	0.0789579	0.150748	0.719527	0.749777	0.561554	0.227612	0.085331	0.613752	0.278386	0.901999	0.890348	0.938846	0.641519	0.692434	0.0437429	0.645526	0.244144	0.602136
Q5SSG8	MUC21	0.612614	0.995373	0.202013	0.605711	0.800724	0.953859	0.195997	0.00183638	0.778132	0.689203	0.985769	0.204267	0.828719	0.659214	0.775615	0.302165	0.623784	0.162514	0.769034	0.409578	0.235411	0.99445	0.920267	0.988966	0.934275	0.743411	0.299736	0.345491	0.513351
Q96QC0	PPP1R10	0.735059	0.964424	0.490969	0.156988	0.163751	0.635435	0.488677	0.182682	0.338167	0.706543	0.198648	0.861421	0.170264	0.491937	0.385795	0.332784	0.922004	0.767825	0.156743	0.285098	0.414125	0.753769	0.751283	0.954448	0.521778	0.947759	0.186874	0.377817	0.864317
Q96EB1	ELP4	0.695981	0.948559	0.724095	0.363467	0.00468609	0.322066	0.514244	0.64362	0.489085	0.221341	0.804914	0.567861	0.859644	0.733297	0.079819	0.0796649	0.525704	0.482749	0.365894	0.305449	0.526325	0.149951	0.468095	0.224747	0.698752	0.569696	0.649017	0.532597	0.374596
P29400	COL4A5	0.648937	0.991057	0.580692	0.517556	0.380112	0.883839	0.222016	0.642683	0.170518	0.0355252	0.563483	0.769724	0.925316	0.597451	0.232358	0.316327	0.326925	0.693958	0.105331	0.889909	0.955047	0.69312	0.183968	0.590854	0.211134	0.970567	0.750296	0.743701	0.713839
Q9H9K5	ERVMER34-1	0.737472	0.981745	0.795191	0.77161	0.549924	0.426382	0.0468311	0.416535	0.747186	0.865503	0.107308	0.850735	0.741275	0.479012	0.254153	0.707213	0.328096	0.904079	0.429852	0.0559732	0.545605	0.484425	0.721483	0.55911	0.513746	0.444808	0.454804	0.0325132	0.786025
Q9Y2L1	DIS3	3.01164	3.13698	2.27528	2.56539	2.70372	1.61665	2.13934	1.30582	1.32777	1.18773	1.06135	0.317909	0.88662	1.27031	0.967732	0.444516	0.141511	1.81643	1.64787	0.768733	1.23729	2.12386	2.86746	1.28453	1.70682	0.678448	1.29004	0.771181	1.00499
O43929	ORC4	0.508153	0.997966	0.904789	0.463029	0.810801	0.430184	0.0794338	0.317074	0.597719	0.362011	0.599656	0.512823	0.062188	0.807471	0.579582	0.335573	0.617608	0.288671	0.476149	0.411972	0.521978	0.0484898	0.766099	0.349585	0.972871	0.509063	0.983559	0.654745	0.156769
Q9BYD6	MRPL1	0.33417	0.954441	0.0120717	0.586645	0.618099	0.857736	0.37868	0.455592	0.485679	0.0136037	0.6452	0.347213	0.36742	0.361848	0.572762	0.811897	0.652764	0.3785	0.616441	0.108219	0.488011	0.877148	0.733785	0.635596	0.168596	0.422991	0.465867	0.448623	0.93284
Q9Y240	CLEC11A	0.743267	0.973746	0.410966	0.943587	0.710732	0.0991331	0.541599	0.386552	0.761564	0.687787	0.690919	0.214533	0.0832132	0.637436	0.283664	0.553508	0.731108	0.428383	0.82688	0.367889	0.713976	0.771594	0.1822	0.902387	0.0410622	0.68168	0.3289	0.354509	0.963741
Q9NXC5	MIOS	0.450892	0.982456	0.382039	0.0405346	0.584327	0.849885	0.593973	0.52206	0.671275	0.159961	0.425593	0.598936	0.667344	0.552212	0.611335	0.438616	0.335631	0.125668	0.145779	0.869736	0.238977	0.817878	0.0918828	0.845309	0.281866	0.432217	0.647615	0.521535	0.844095
P20648	ATP4A	0.243584	0.986496	0.416689	0.468989	0.308963	0.390391	0.522072	0.384352	0.928529	0.0862863	0.727721	0.353913	0.938173	0.39274	0.559012	0.730617	0.772037	0.300269	0.416457	0.036559	0.798671	0.881365	0.863657	0.179535	0.740229	0.242339	0.273576	0.629994	0.608464
P30492	P30492	0.527153	0.93817	0.371171	0.604402	0.185948	0.136043	0.437293	0.604842	0.696613	0.722255	0.394817	0.625648	0.534105	0.118077	0.323154	0.0953987	0.392305	0.0640339	0.19811	0.616185	0.304746	0.868661	0.26356	0.460009	0.490114	0.380443	0.241122	0.31604	0.447871
Q8TEU7	RAPGEF6	0.93282	0.95419	0.528168	0.628919	0.652832	0.51719	0.365769	0.836593	0.249486	0.112103	0.751753	0.286388	0.211533	0.224813	0.630298	0.356952	0.0331686	0.112775	0.297792	0.695528	0.72991	0.767246	0.359403	0.503052	0.409006	0.351278	0.633562	0.448646	0.79383
Q07002	CDK18	0.167373	0.906759	0.519962	0.619998	0.348272	0.295764	0.610575	0.735264	0.886721	0.301523	0.132168	0.327102	0.331227	0.593391	0.485242	0.605458	0.471034	0.903639	0.696133	0.697325	0.0916778	0.838528	0.310482	0.0634126	0.135931	0.63288	0.823183	0.66383	0.686626
O75038	PLCH2	0.62227	0.994567	0.370614	0.882512	0.630676	3.61e-05	0.342017	0.781445	0.738146	0.324001	0.312502	0.819765	0.430723	0.210685	0.909109	0.796814	0.181559	0.280792	0.510968	0.760016	0.233573	0.86458	0.253319	0.475503	0.84513	0.585262	0.954339	0.367077	0.940886
Q9NZN5	ARHGEF12	0.580574	0.959308	0.522828	0.279742	0.355409	0.185157	0.711659	0.745871	0.0603483	0.743634	0.336826	0.606841	0.331101	0.0687681	0.598375	0.647972	0.907836	0.706657	0.171798	0.629807	0.581919	0.914606	0.274864	0.486947	0.133319	0.780546	0.465231	0.328982	0.490718
Q9UPX8	SHANK2	0.743768	0.949676	0.0836343	0.121538	0.729786	0.919837	0.626892	0.628624	0.18214	0.746234	0.879647	0.55727	0.864357	0.69011	0.490905	0.910193	0.176753	0.699077	0.613046	0.719241	0.799258	0.409828	0.0298593	0.85485	0.155459	0.915497	0.776045	0.892628	0.448063
Q8NB90	SPATA5	0.234024	0.995964	0.0704591	0.755936	0.936804	0.704763	0.41806	0.500755	0.433236	0.561768	0.652639	0.0592709	0.269989	0.424184	0.423162	0.925092	0.666087	0.0414339	0.711207	0.452116	0.343996	0.912765	0.357176	0.411931	0.583042	0.39394	0.749818	0.751044	0.828188
A0A096LP55	UQCRHL	0.309898	0.999132	0.706407	0.325302	0.709412	0.248153	0.599271	0.1806	0.959494	0.298437	0.252796	0.220065	0.615481	0.882528	0.710249	0.37295	0.648459	0.118717	0.240883	0.7907	0.606963	0.445522	0.397909	0.345767	0.154779	0.265904	0.848148	0.857647	0.733992
Q8NFZ0	FBH1	85247.4	96469.6	14266.8	18592.6	58283.9	81160.3	37814.7	65585	53556.3	28960.2	30730.9	33126.9	40630.5	95404.8	27200.7	5622.37	83954.5	64297.6	67338	65824.1	27558.8	73322.6	82474.3	75948.4	41107.2	11598.5	44435.9	85023.9	38564.5
Q8WWX9	SELENOM	0.200311	0.978959	0.508018	0.929662	0.769478	0.0747276	0.35946	0.636003	0.190846	0.275566	0.399455	0.472684	0.93039	0.518725	0.449236	0.103882	0.370465	0.799947	0.696553	0.688738	0.437622	0.570563	0.658574	0.806349	0.516947	0.368449	0.378419	0.0725801	0.770104
O14686	KMT2D	0.486035	0.984515	0.830935	0.317215	0.906393	0.00406867	0.46686	0.745641	0.445331	0.762211	0.160781	0.344269	0.744893	0.841098	0.237607	0.948382	0.486365	0.112315	0.772983	0.508248	0.914135	0.407514	0.487947	0.725879	0.569576	0.517608	0.582186	0.858817	0.163842
Q9UDY8	MALT1	0.572453	0.843381	0.209616	0.777217	0.638477	0.205681	0.373091	0.769571	0.410063	0.383103	0.39165	0.354274	0.23821	0.560337	0.637355	0.834628	0.628871	0.15559	0.722063	0.744736	0.690888	0.424098	0.704991	0.730908	0.109127	0.0820101	0.0673594	0.380009	0.536443
Q9GZT4	SRR	0.356171	0.990643	0.125484	0.285699	0.472245	0.491129	0.162718	0.236373	0.907445	0.68869	0.819126	0.884147	0.288995	0.879867	0.800846	0.836112	0.578658	0.288236	0.477244	0.599915	0.652499	0.396681	0.757478	0.248134	0.754956	0.89152	0.205106	0.0985885	0.501061
Q15024	EXOSC7	0.112346	0.991549	0.419874	0.626757	0.67625	0.352957	0.722779	0.827217	0.811663	0.255214	0.486201	0.817808	0.200572	0.625412	0.73941	0.331686	0.685296	0.956334	0.0596894	0.417624	0.750522	0.947414	0.19921	0.293494	0.492133	0.187796	0.368195	0.660959	0.427978
Q8N5K1	CISD2	0.602969	0.983739	0.384982	0.66193	0.306674	0.936661	0.942299	0.804284	0.564141	0.779393	0.651204	0.60356	0.790034	0.787994	0.22078	0.172662	0.356884	0.917311	0.690432	0.0506552	0.199053	0.803284	0.200931	0.866171	0.695596	0.324554	0.131478	0.435986	0.554307
A8MUU1	FABP5P3	0.16448	0.992553	0.986669	0.890957	0.402571	0.269997	0.577036	0.131987	0.104813	0.835512	0.704249	0.801327	0.68899	0.308058	0.799534	0.645476	0.513243	0.487556	0.109447	0.604743	0.836877	0.0824221	0.754618	0.647247	0.405357	0.838486	0.714369	0.616738	0.751678
Q9P1W8	SIRPG	0.87513	0.985144	0.92382	0.180167	0.257428	0.539299	0.56108	0.128248	0.96559	0.443064	0.875459	0.840432	0.734195	0.276834	0.657513	0.0115009	0.122444	0.693424	0.525702	0.837023	0.720604	0.654063	0.508609	0.864552	0.817593	0.88094	0.932161	0.453477	0.423352
P27987	ITPKB	0.184437	0.97273	0.91712	0.34152	0.252584	0.866276	0.931664	0.24118	0.77808	0.270373	0.101651	0.683998	0.537577	0.875981	0.631821	0.735909	0.257525	0.382025	0.735384	0.333091	0.673715	0.580662	0.703762	0.420209	0.0263711	0.654441	0.681053	0.620506	0.779518
O95182	NDUFA7	0.739028	0.995878	0.638504	0.0868193	0.685949	0.0442568	0.578206	0.655611	0.69543	0.211679	0.764603	0.292511	0.342946	0.281777	0.492803	0.231297	0.271692	0.747521	0.434369	0.129443	0.355953	0.388188	0.682952	0.50898	0.423459	0.417112	0.309719	0.57688	0.709381
Q6NUM9	RETSAT	0.90499	0.992674	0.740325	0.813068	0.283026	0.757035	0.482111	0.621624	0.329746	0.0226478	0.533784	0.218087	0.567882	0.522377	0.823654	0.914724	0.466894	0.0411015	0.435799	0.703832	0.60299	0.298787	0.365871	0.617687	0.313823	0.56926	0.972781	0.768515	0.275942
Q9UKU7	ACAD8	0.453978	0.937192	0.894528	0.199708	0.269357	0.631555	0.689217	0.514515	0.36794	0.915575	0.761351	0.35829	0.419804	0.21612	0.821684	0.0778753	0.131339	0.881173	0.370015	0.233458	0.858579	0.92269	0.456055	0.62805	0.678248	0.85659	0.92338	0.523956	0.261767
P05452	CLEC3B	0.675945	0.932999	0.800586	0.306073	0.420385	0.844399	0.689085	0.386408	0.46716	0.678041	0.330042	0.190501	0.350676	0.636245	0.456313	0.500063	0.772322	0.013343	0.301427	0.453483	0.391441	0.0187281	0.352118	0.560085	0.561833	0.756146	0.297528	0.599792	0.301069
Q6S5L8	SHC4	0.508278	0.929539	0.569949	0.352172	0.137021	0.545011	0.524286	0.277757	0.659387	0.778136	0.775104	0.842333	0.0818801	0.0522518	0.925168	0.743279	0.852928	0.697186	0.766397	0.821001	0.710505	0.567265	0.40015	0.0586665	0.352733	0.828261	0.442541	0.574458	0.534083
Q684P5	RAP1GAP2	0.409874	0.962833	0.574027	0.27438	0.04006	0.433941	0.612576	0.753455	0.786858	0.789374	0.809211	0.495679	0.821928	0.414169	0.0457056	0.824503	0.304865	0.752661	0.807787	0.290838	0.501104	0.298391	0.195956	0.803355	0.855416	0.787426	0.757465	0.291282	0.91998
Q9H3R2	MUC13	0.900258	0.96271	0.619319	0.319069	0.147785	0.0859175	0.437915	0.495325	0.383774	0.771833	0.352476	0.939814	0.308752	0.776463	0.71007	0.096592	0.339412	0.191881	0.380768	0.597807	0.409872	0.773539	0.644233	0.636759	0.757987	0.857308	0.703052	0.674325	0.209675
Q8N201	INTS1	0.521227	0.991291	0.26599	0.887285	0.266568	0.724073	0.472975	0.738443	0.570351	0.0880985	0.575344	0.747014	0.713615	0.797924	0.373173	0.0792926	0.745525	0.148754	0.715626	0.529604	0.686273	0.410126	0.593745	0.305534	0.317416	0.431043	0.589648	0.0810068	0.685468
Q8N653	LZTR1	0.695533	0.974188	0.00205717	0.45443	0.355286	0.903413	0.689866	0.665234	0.29835	0.471787	0.751056	0.474262	0.711938	0.730845	0.64801	0.666514	0.463049	0.074315	0.0247443	0.816356	0.770839	0.626458	0.326916	0.588297	0.61669	0.450921	0.436878	0.559688	0.361891
Q96T58	SPEN	0.417166	0.988751	0.516237	0.355682	0.0790554	0.759635	0.984147	0.830903	0.451767	0.273643	0.40768	0.758954	0.282703	0.749187	0.789209	0.318934	0.164914	0.849728	0.618394	0.420911	0.333299	0.344292	0.0685415	0.405115	0.774911	0.924223	0.702858	0.786679	0.708506
Q8NB14	USP38	0.967025	0.972275	0.0564128	0.556286	0.655995	0.534896	0.797057	0.908371	0.918345	0.859202	0.0140582	0.497295	0.560396	0.525213	0.772215	0.934195	0.659276	0.776941	0.496473	0.287728	0.33218	0.770855	0.438081	0.825846	0.278504	0.13296	0.769131	0.520256	0.370515
Q53GD3	SLC44A4	0.955731	0.971316	0.643129	0.969888	0.565514	0.431384	0.719276	0.602882	0.565471	0.836836	0.390386	0.504443	0.115393	0.882542	0.104673	0.21118	0.500582	0.224617	0.929066	0.285597	0.340135	0.333643	0.631232	0.583756	0.522467	0.127274	0.778094	0.338762	0.501181
Q9BQE4	SELENOS	1998.91	2456.97	1824.06	781.931	2264.45	1584.03	1575.95	1436.57	843.108	1604.49	1885.2	890.796	416.381	542.385	915.672	1310.45	28.6489	1387.33	1188.94	742.868	1396.44	1086.62	1134.41	2264.48	944.691	170.386	1684.28	1400.62	1566.09
Q5JTY5	CBWD3	0.558345	0.961177	0.300708	0.422723	0.382585	0.884697	0.542981	0.0898644	0.432079	0.272409	0.402118	0.759596	0.750838	0.77333	0.240247	0.604323	0.218862	0.349332	0.829471	0.926239	0.82263	0.350767	0.0805026	0.311405	0.909697	0.894214	0.666277	0.760408	0.488392
P19652	ORM2	0.574106	0.985038	0.750174	0.54981	0.930198	0.103243	0.667872	0.144772	0.351177	0.763535	0.658435	0.7477	0.689376	0.720894	0.26351	0.193135	0.357997	0.938118	0.388058	0.679745	0.616265	0.851678	0.819685	0.2202	0.446476	0.785792	0.273463	0.487254	0.141887
Q9H6R4	NOL6	0.348457	0.996093	0.650934	0.399345	0.536124	0.454	0.329997	0.903186	0.454159	0.401577	0.534026	0.0417403	0.939302	0.876146	0.764109	0.712714	0.92267	0.486883	0.271121	0.807598	0.375966	0.407263	0.809299	0.542093	0.166838	0.305899	0.678343	0.202081	0.23859
O94782	USP1	0.0744729	0.888229	0.661605	0.548277	0.669143	0.753249	0.721433	0.633378	0.736996	0.647501	0.449213	0.414323	0.233455	0.610269	0.578497	0.176071	0.394876	0.251951	0.858625	0.0476936	0.856354	0.625001	0.822518	0.417568	0.607483	0.177477	0.684574	0.302934	0.345434
Q92546	RGP1	0.531306	0.978203	0.698126	0.620065	0.0892784	0.146769	0.916547	0.925312	0.436949	0.594316	0.239873	0.125373	0.311169	0.301557	0.527435	0.476183	0.639912	0.638273	0.875119	0.283045	0.175951	0.49384	0.744952	0.337298	0.396473	0.677049	0.61862	0.462698	0.601396
Q6NXT4	SLC30A6	0.924457	0.97367	0.339614	0.811028	0.226618	0.0073787	0.424329	0.22154	0.742113	0.310223	0.476871	0.475221	0.619912	0.400541	0.336511	0.358871	0.775576	0.755561	0.642172	0.921464	0.675322	0.587335	0.558297	0.436698	0.123016	0.708849	0.401491	0.561701	0.356158
Q92796	DLG3	0.318687	0.983655	0.927485	0.417739	0.227518	0.815604	0.104815	0.803514	0.197534	0.598315	0.713523	0.436107	0.660188	0.478371	0.942933	0.239278	0.240114	0.448389	0.78633	0.332906	0.363412	0.964563	0.652027	0.882901	0.574772	0.806643	0.726927	0.948903	0.198129
Q9Y336	SIGLEC9	0.530298	0.987749	0.499471	0.635873	0.559242	0.18896	0.601543	0.0896891	0.185766	0.370039	0.412961	0.710978	0.562713	0.223966	0.402243	0.429993	0.112453	0.782578	0.24188	0.53098	0.201739	0.307818	0.550012	0.269783	0.319191	0.600049	0.781903	0.353102	0.368819
O94913	PCF11	0.473313	0.98845	0.463761	0.454157	0.986346	0.0785415	0.335271	0.984366	0.663833	0.408251	0.751788	0.618219	0.662731	0.485648	0.632469	0.354538	0.937001	0.733872	0.241974	0.238647	0.722079	0.269017	0.970511	0.732583	0.604457	0.198074	0.47149	0.415654	0.148556
Q6ZT12	UBR3	0.357834	0.993859	0.0332417	0.431699	0.400009	0.0565134	0.475978	0.814487	0.52428	0.25429	0.673558	0.855471	0.477859	0.710901	0.503403	0.455265	0.473488	0.549569	0.906573	0.464569	0.553109	0.917362	0.546302	0.771777	0.714898	0.18053	0.466716	0.841233	0.253452
Q9H0C2	SLC25A31	0.284129	0.991247	0.655558	0.718629	0.673377	0.615139	0.540479	0.947841	0.0984627	0.674712	0.513362	0.141983	0.385743	0.546039	0.434107	0.914321	0.70702	0.118061	0.717988	0.276218	0.803175	0.585907	0.560787	0.410259	0.130495	0.986073	0.951099	0.540427	0.813336
O75795	UGT2B17	0.510046	0.988814	0.96163	0.355051	0.932302	0.728564	0.379098	0.871129	0.680254	0.548237	0.920392	0.122027	0.0804202	0.816913	0.294054	0.620458	0.622154	0.452297	0.666557	0.983635	0.754079	0.177436	0.360079	0.346113	0.811512	0.255315	0.581965	0.363571	0.768649
Q9BUN8	DERL1	0.115673	0.960007	0.586745	0.719267	0.17956	0.849713	0.714159	0.358018	0.459354	0.883458	0.811267	0.705117	0.108771	0.927871	0.235134	0.770047	0.725253	0.864585	0.851051	0.783415	0.460116	0.615575	0.506515	0.258939	0.289497	0.867513	0.631036	0.290929	0.459388
P35125	USP6	0.365847	0.963221	0.219819	0.155694	0.398781	0.486772	0.951612	0.753223	0.13057	0.844995	0.903825	0.501739	0.748543	0.158686	0.30237	0.360761	0.554111	0.783473	0.378722	0.760852	0.295667	0.488412	0.906666	0.474132	0.684906	0.898001	0.472684	0.540864	0.464677
Q9UKV0	HDAC9	0.51468	0.947525	0.322276	0.587114	0.489335	0.391101	0.388938	0.926603	0.804692	0.371207	0.928203	0.563513	0.492568	0.854101	0.640836	0.113898	0.125974	0.892848	0.253914	0.653353	0.539382	0.785092	0.742754	0.513696	0.386503	0.475631	0.74476	0.122271	0.269658
P21709	EPHA1	0.970257	0.986545	0.933577	0.728754	0.479334	0.476503	0.2766	0.178625	0.700369	0.493731	0.744965	0.244283	0.817442	0.0657965	0.306443	0.683177	0.590941	0.579202	0.334996	0.321407	0.417271	0.931169	0.853978	0.671015	0.949903	0.40055	0.577016	0.515322	0.303906
Q9BRZ2	TRIM56	0.61783	0.949577	0.48112	0.477839	0.622629	0.0351747	0.802984	0.605403	0.847859	0.182857	0.135321	0.876143	0.360054	0.812805	0.566258	0.163712	0.658653	0.663152	0.926445	0.632573	0.53461	0.434221	0.660464	0.474086	0.91816	0.786357	0.667288	0.53996	0.253448
Q9H1Z9	TSPAN10	0.428636	0.878452	0.718484	0.462199	0.323454	0.489943	0.758086	0.295294	0.327583	0.168725	0.286192	0.293347	0.118335	0.61049	0.585032	0.467186	0.55109	0.870603	0.336544	0.194912	0.691709	0.436492	0.192762	0.798883	0.329506	0.262013	0.421765	0.325038	0.336541
Q9BQ95	ECSIT	0.609035	0.916452	0.804278	0.603445	0.254273	0.178377	0.0364813	0.742168	0.387037	0.747725	0.62856	0.908236	0.834495	0.855338	0.351894	0.718095	0.504103	0.828397	0.371583	0.909854	0.309187	0.458779	0.86954	0.420698	0.672136	0.770405	0.886447	0.458097	0.177916
Q8NI51	CTCFL	0.284685	0.992887	0.245163	0.815319	0.956305	0.144074	0.565077	0.836132	0.701774	0.443516	0.57837	0.938611	0.668016	0.715576	0.139282	0.706192	0.956707	0.749524	0.113747	0.931925	0.910178	0.654306	0.696575	0.506095	0.924887	0.734214	0.206747	0.813275	0.560438
P28827	PTPRM	0.375499	0.989044	0.582803	0.560586	0.201395	0.53485	0.334412	0.897316	0.136408	0.333588	0.279427	0.756481	0.841823	0.276549	0.496352	0.810896	0.519435	0.689772	0.617242	0.262301	0.529511	0.684974	0.586955	0.40738	0.1754	0.847584	0.419659	0.217846	0.382088
Q9NXF1	TEX10	0.902237	1.1023	1.01437	0.486055	1.02094	0.523505	0.670871	0.225944	0.492223	0.649008	0.88669	0.712923	0.619062	0.687978	0.990087	1.05349	0.245821	0.622103	0.115407	0.83065	0.684673	0.266012	0.27858	0.411026	0.238392	1.00878	0.602919	0.551295	0.738935
Q96AJ9	VTI1A	0.231221	0.996268	0.738172	0.617745	0.858477	0.754166	0.481765	0.347195	0.932768	0.483941	0.564209	0.410856	0.651285	0.25536	0.8652	0.269729	0.109383	0.276346	0.473191	0.220123	0.86358	0.297391	0.496476	0.291248	0.663229	0.415002	0.554151	0.680413	0.584573
Q8TDB8	SLC2A14	2845960000000000	6565200000000000	2108230000000000	4638390000000000	3203180000000000	4633540000000000	4259170000000000	2121850000000000	6270580000000000	1514120000000000	2765130000000000	4683250000000000	4598450000000000	5684780000000000	2724190000000000	3097730000000000	5533810000000000	345880000000000	2857330000000000	3903560000000000	3793080000000000	2984560000000000	791592000000000	1948990000000000	3040860000000000	5786640000000000	2839020000000000	4735770000000000	4337030000000000
Q86XF0	DHFR2	0.392184	0.991212	0.513624	0.78111	0.26013	0.698429	0.875099	0.426751	0.258974	0.92756	0.511721	0.778726	0.325274	0.927746	0.694588	0.557502	0.737348	0.0368561	0.347042	0.91745	0.557243	0.896219	0.812761	0.708243	0.368132	0.459492	0.676056	0.670569	0.187722
Q8IVS2	MCAT	0.929783	0.966398	0.574626	0.229419	0.917176	0.126285	0.828664	0.345344	0.417481	0.801228	0.489313	0.150382	0.582219	0.296836	0.568982	0.816376	0.665266	0.194989	0.554956	0.647523	0.358468	0.554106	0.624035	0.653243	0.411291	0.417451	0.753558	0.781826	0.581551
P98196	ATP11A	0.783717	0.929297	0.859836	0.831515	0.404053	0.64687	0.841585	0.854852	0.869713	0.187882	0.760576	0.372654	0.245249	0.728809	0.508634	0.720985	0.276275	0.877793	0.475445	0.304966	0.441418	0.600571	0.260984	0.262143	0.276568	0.318055	0.709111	0.494468	0.866384
Q86YV0	RASAL3	1.67385	2.88496	2.18632	1.22249	1.85705	1.05229	1.36774	2.15797	0.642167	1.34913	0.636334	1.31247	1.08828	0.712467	1.02597	1.01216	0.969834	2.14688	0.622488	1.26266	0.870789	1.42774	1.64605	0.753933	0.955704	1.17546	0.550145	0.78147	1.06309
O94830	DDHD2	0.306339	0.992817	0.448117	0.975868	0.459586	0.464916	0.401947	0.713447	0.872413	0.650271	0.703924	0.601411	0.428944	0.821168	0.648948	0.154252	0.847658	0.0434323	0.372605	0.627181	0.851545	0.803927	0.803982	0.433006	0.95942	0.784357	0.78457	0.690663	0.749775
P0C7P4	UQCRFS1P1	0.590363	0.943038	0.377308	0.711108	0.564397	0.567027	0.457598	0.365535	0.214128	0.311243	0.496805	0.585472	0.505932	0.450525	0.210965	0.602642	0.504207	0.238385	0.317126	0.86634	0.840339	0.910452	0.544157	0.818434	0.676673	0.192917	0.402469	0.648969	0.893925
Q9HC16	APOBEC3G	0.672718	0.990902	0.371414	0.810689	0.556893	0.90503	0.0853312	0.625391	0.454579	0.462387	0.857995	0.698407	0.750994	0.926312	0.521734	0.43882	0.795731	0.558609	0.512876	0.51194	0.314947	0.368011	0.552855	0.495591	0.93878	0.869483	0.800552	0.19761	0.67928
Q07954	LRP1	1.22517	1.99834	1.29865	1.43087	0.356953	1.26441	1.29706	1.37902	0.490366	0.728285	0.548098	0.482833	0.74393	0.698356	1.30382	0.595985	0.565778	1.05518	1.40313	0.890362	0.41503	1.39123	1.0163	0.99497	1.22282	0.999782	0.864952	0.867622	1.11728
P35326	SPRR2A	23.9586	8.87237	149.355	0.972582	53.1231	19.5969	0	35.9674	0.157683	7.62386	2.81715	2.13741	28.7489	7.61977	0.988156	0.904227	5.7285	60.2805	98.803	14.6661	15.2615	75.9084	48.5915	14.5394	0.689905	10.6587	21.9025	4.97474	8.40586
P05783	KRT18	1335.37	991.247	6857.2	1112.43	1552.4	981.705	775.252	940.131	247.03	287.653	315.652	178.303	375.65	342.948	211.555	1.12089	146.926	974.005	284.077	245.435	167.474	396.992	1275.37	261.488	576.404	196.605	253.766	309.436	43.2079
Q8N1A0	KRT222	21.6961	5.4872	80.8842	2.58969	21.6872	11.4804	12.0775	60.0423	8.4234	7.02064	3.65729	1.0934	20.0812	5.85937	4.60971	0.65763	5.07618	7.28141	13.6561	1.74916	1.08584	4.52734	4.62842	1.60884	12.7287	1.78332	2.24474	8.95834	17.647
P08727	KRT19	4476.73	2939.88	16770.7	3315.2	4354.62	2613.14	2282.98	3251.59	617.311	935.22	1048.88	432.491	1688.23	1328.07	757.279	3.14282	459.707	3946.06	459.676	776.874	553.192	913.208	4585.85	698.936	2024.84	564.823	611.737	1023.33	58.8492
P40305	IFI27	24.8687	3.04207	45.4905	10.2231	37.0678	12.41	9.04471	30.8192	5.28718	5.96896	2.54613	4.01418	8.06591	7.58188	1.34981	0.925293	3.18273	9.44968	10.3723	0.967872	0.708383	5.09746	11.6142	1.40062	9.55439	1.45841	1.35809	10.7654	5.49879
O75376	NCOR1	107.319	42.4171	178.153	99.1453	165.502	47.9891	37.6312	145.735	17.1941	16.8609	10.835	13.6399	27.4304	31.7881	2.75483	0.109204	9.62296	47.9404	36.7922	21.8941	1.39265	23.7488	65.259	9.82874	36.1779	18.3284	16.7112	31.9739	11.739
Q9NX55	HYPK	23.4493	6.66041	58.597	13.8837	53.5218	23.4989	15.307	39.7952	10.6451	4.65895	4.51496	3.76569	6.92774	10.4707	2.09501	0.348203	6.33454	15.7688	8.62784	2.19774	1.29999	10.7085	15.9489	4.12809	19.1868	1.58883	1.43254	13.4975	4.2944
P35900	KRT20	52.7046	40.2056	155.13	37.8414	42.7355	35.4767	36.2765	42.1366	7.65524	5.72004	11.4579	3.21891	12.9155	4.80057	15.6444	0.352437	3.53336	35.7457	21.8111	8.40021	6.7153	29.6533	42.9852	13.3535	25.3055	14.3596	8.08928	7.84837	8.80713
Q68D06	SLFN13	45.7782	22.5537	94.1888	39.649	67.6203	18.2722	18.9765	47.1467	7.17341	10.4388	10.4978	7.50281	18.4611	16.078	2.62293	1.66437	4.68024	28.62	20.5415	2.10194	4.28602	13.4442	26.9834	3.70884	21.4775	2.08881	2.85144	16.6743	8.02147
A6QL63	BTBD11	30.5584	28.9909	96.9937	41.147	95.4483	24.462	6.88257	81.1786	11.0289	7.82801	9.47646	8.63201	18.0044	26.7523	2.56559	3.08709	7.33734	36.3525	18.0346	14.2626	3.67548	18.6551	43.4588	5.1078	14.3755	13.2957	13.9409	16.0711	2.99692
Q9NSB2	KRT84	94.7892	48.3653	109.123	44.4953	100.286	12.4848	41.3964	12.5196	44.7593	18.6174	15.3962	4.50111	9.72608	9.40441	10.3965	0.610102	3.99628	63.4584	28.2398	10.1983	7.6523	29.1037	76.8127	14.108	35.8477	10.7758	6.40654	22.3501	5.0528
P50479	PDLIM4	44.3734	5.59741	87.7492	15.666	68.1504	15.2894	16.4567	49.9377	21.6625	8.96742	4.80386	8.22714	10.0508	15.91	3.03872	0.546413	6.46349	28.8056	41.234	2.83493	2.50266	20.024	27.7797	3.33213	22.1129	5.58752	4.36847	23.6296	19.4941
P31942	HNRNPH3	1170.32	1183.9	3348.29	918.659	2678.21	1154.81	1459.04	1387.97	594.774	334.462	198.887	272.762	604.379	637.644	186.165	0.291021	96.4918	1021.71	337.337	175.092	90.4264	482.739	1258.18	151.612	564.402	225.601	282.437	594.229	152.64
Q9UBC9	SPRR3	129.222	93.4622	264.429	121.557	87.5502	73.8422	60.4915	67.4202	0.109308	26.7961	35.9254	20.0991	65.1558	62.3631	21.1472	0.661328	11.7692	95.4094	47.6375	8.3189	24.8435	23.0367	50.1194	6.24864	57.8428	5.85859	10.5482	47.1025	12.9876
Q96QV6	H2AC1	207.729	86.4106	254.518	123.257	208.283	155.196	104.901	99.5989	90.7387	16.4505	32.0256	8.12533	23.7153	30.1485	20.1085	0.997481	5.7798	108.605	33.4084	21.239	9.30698	38.7821	125.769	25.947	106.943	17.9906	16.3517	56.9278	21.1413
P23246	SFPQ	63.1649	59.2922	1038.13	95.8246	50.545	52.0421	425.904	50.0029	166.769	174.63	165.085	118.858	224.605	845.555	103.735	0.0734784	81.3275	554.058	254.299	148.898	86.8804	347.867	585.461	152.802	317.657	142.368	168.896	203.617	44.6648
O76054	SEC14L2	46.5832	21.3031	108.158	42.0363	93.3053	23.0236	15.7083	99.4455	14.6495	5.37953	8.55507	6.70661	21.2188	23.1074	4.63636	1.1406	6.58593	39.3057	27.7729	14.4956	3.14486	21.257	40.4017	5.66755	22.7753	16.9607	13.2896	15.737	10.2029
P29034	S100A2	3603.7	2098.7	5861.27	2673.49	5437.01	1753.55	1274.83	3721.73	647.087	554.973	521.996	442.442	1284.01	866.648	387.383	1.53877	330.625	3498.62	1145.47	585.65	249.195	1252.95	4342.56	391.112	1695.66	488.026	649.286	870.705	404.547
Q9Y3C1	NOP16	20.2794	11.5189	55.6498	13.5618	49.2683	18.1332	11.3427	21.285	12.288	5.70922	4.65402	7.63527	3.93252	6.15403	1.64267	1.07938	3.66945	18.389	11.1419	2.73915	1.11276	10.0288	25.081	5.50918	15.3866	4.83437	4.56668	9.10321	1.83351
Q9UN76	SLC6A14	10.8266	7.20456	26.4055	6.83285	19.9669	7.23348	4.26768	10.9893	1.16927	4.62368	2.48486	2.02992	5.02862	4.8827	1.38203	0.855189	1.30971	9.85219	7.89308	1.65646	1.17715	2.49076	9.54951	0.334476	5.36187	1.01845	0.960205	7.73977	2.40127
Q9NUP9	LIN7C	22.8481	16.1263	58.2856	21.101	43.8332	20.8813	15.1657	34.7489	6.77435	7.2129	5.86591	5.01917	12.1397	8.20785	2.64635	1.19165	4.8407	20.9733	11.0988	2.15812	2.24687	15.1946	20.2086	2.55821	13.6431	1.28285	2.78207	7.41316	2.92837
O95573	ACSL3	240.688	168.142	639.301	90.6065	269.162	99.6998	132.518	494.709	81.5198	97.3302	37.8593	44.0263	150.609	52.9469	47.5579	0.860559	42.8287	190.979	172.942	29.9593	29.5954	86.4671	141.96	52.7601	100.833	20.6518	37.3913	76.6054	188.746
P30519	HMOX2	74.1111	31.8535	132.604	42.8371	100.486	41.3535	34.7555	83.3058	14.7594	15.0197	10.0924	10.0118	29.3103	18.3725	6.31124	0.724659	11.4144	33.3601	43.9727	7.47847	5.11083	27.4156	53.2693	6.04719	32.1038	6.35392	8.97229	22.6807	8.31032
P47895	ALDH1A3	470.705	208.235	614.169	321.658	496.329	160.557	172.187	431.448	57.7735	52.8121	29.6734	39.3942	127.669	105.281	34.3109	0.216103	34.9286	335.438	399.843	73.2492	18.2432	187.959	413.077	38.557	201.53	67.0189	60.5206	114.209	109.553
Q9BRP8	PYM1	185.279	139.792	310.735	178.255	266.459	92.0064	139.169	77.3082	110.611	21.4016	33.651	8.79998	18.3556	67.1347	17.4674	0.568091	11.9627	112.291	113.663	31.3528	10.4966	32.4402	122.722	14.0459	91.7283	34.4527	42.5459	101.627	281.49
Q9P289	STK26	0.912493	0.895123	0.922026	0.121698	0.0602417	0.0828578	0.648641	0.100661	0.691289	0.842965	0.0975317	0.364517	0.123952	0.0388577	0.918709	0.274904	0.304214	0.0963486	0.777107	0.538852	0.125999	0.0711448	0.128637	0.349805	0.038093	0.848362	0.177877	0.0350856	0.171058
P49006	MARCKSL1	270.761	177.135	627.551	171.566	520.711	211.305	188.249	338.58	105.29	70.8874	63.406	33.0042	107.668	83.0165	43.5516	0.595252	36.8863	245.724	106.559	41.8464	31.2633	127.33	291.829	41.3829	148.865	41.7884	52.4176	113.957	27.6115
Q5VUR7	ANKRD20A3P	30.2882	22.253	55.3633	26.8613	52.3231	14.3986	14.1193	39.4054	9.10209	4.3264	7.55231	3.63478	10.6284	5.34675	4.42975	0.839399	4.25244	26.7986	9.73289	5.9468	4.08731	16.0313	33.2131	4.39416	10.9224	5.40044	6.78925	5.00053	3.9499
P04080	CSTB	3828.05	2105.4	4909.4	2729.49	4446.92	1749.74	1584.43	3317.1	554.37	546.847	453.241	323.713	957.972	719.102	339.889	0.895237	349.738	2479.35	1362.4	513.586	199.234	1310.79	3031.2	462.313	1595.57	421.543	473.965	934.808	330.397
P07305	H1-0	1410.52	714.324	1873.9	906.769	1516.54	535.653	552.294	1249.19	221.908	154.774	193.102	165.222	380.372	231.535	140.444	1.41798	149.573	761.067	408.146	153.402	80.6827	413.822	898.554	134.207	519.039	146.856	132.09	272.52	248.607
P08134	RHOC	12.4787	5.92323	25.9088	8.51469	19.218	8.46853	4.65726	15.0371	4.08617	2.8506	2.22284	1.93509	5.26772	3.96692	1.58834	1.05308	2.30316	8.16472	4.68181	1.37369	1.57768	3.30632	9.19831	1.00331	5.72578	0.909996	1.09153	4.66162	2.00537
P20962	PTMS	805.081	411.756	1453.47	428.198	1385.15	422.827	525.613	516.913	458.338	218.768	158.007	93.548	172.653	208.34	81.6617	1.09048	73.7309	541.501	285.411	128.796	77.8184	286.776	726.442	104.576	433.57	86.9802	127.864	305.275	61.6307
Q01581	HMGCS1	112.846	80.1227	217.509	65.1151	185.182	54.9732	70.6803	153.502	20.1948	12.922	17.3038	16.9283	41.4781	27.2775	7.02794	0.975741	21.1215	76.1225	90.4155	19.9768	8.47195	66.9748	130.257	22.3484	78.6238	19.5564	18.296	32.6259	26.7372
Q96C90	PPP1R14B	5.3919	0.24328	6.72535	1.96591	4.93197	1.20178	2.97442	2.03179	2.53894	1.56349	0.359542	1.1265	0.893959	1.75628	0.249934	0.14982	0.96747	1.19727	2.7663	0.153996	0.509139	1.15989	1.5557	0.599106	3.10428	0.141577	0.108297	3.2306	2.21401
Q9C002	NMES1	48.5527	30.2684	109.972	29.8676	85.1336	24.0222	16.4219	68.6718	10.265	12.9738	3.04903	5.31625	19.3155	20.8438	1.7137	1.18373	5.87006	64.529	84.8934	17.809	8.70035	51.4222	52.9687	8.99863	19.5867	15.7736	21.1036	24.5285	14.4336
Q93077	H2AC6	32.575	29.8702	96.1624	29.3612	72.0296	33.1522	27.0116	11.6822	3.84055	36.8548	12.1772	9.32173	7.98768	27.4973	4.98561	0.976713	5.93678	56.3141	22.0384	6.83222	4.33939	23.6763	49.0813	7.60558	18.826	8.0053	9.20364	27.2515	1.95523
P48739	PITPNB	104.163	75.5743	239.403	102.444	211.646	103.138	69.0122	149.12	39.9379	22.0289	23.901	15.5932	44.7544	25.2177	15.2716	0.707553	14.1774	99.523	77.4025	21.0227	11.2458	66.5105	103.509	20.608	50.8219	14.8939	26.2653	31.5146	20.2536
P04279	SEMG1	35.9176	76.1719	117.903	116.659	68.7079	64.4177	113.617	26.2417	18.9871	5.04719	12.9191	0.679669	21.8338	15.2656	21.4589	2.24386	3.96668	25.7041	55.5574	40.0312	4.75246	31.258	30.0976	7.62088	9.99482	44.4164	34.9796	53.6619	17.591
P53007	SLC25A1	33.7505	24.7584	81.28	14.4656	64.1578	20.0229	20.8683	44.1578	11.8294	12.4544	7.05085	5.58664	15.6158	14.7802	2.48339	0.338751	6.05753	54.3339	69.2756	7.12812	3.99498	45.141	41.5077	4.76178	21.0681	9.41827	9.80323	20.0097	13.4614
Q04695	KRT17	11866.4	8335.4	15901.4	11504.2	12627.3	5824.4	4715.87	10329.9	1584.86	2135.96	2351.68	1416.93	3522.38	3866.34	1439.11	0.776094	739.872	9737.25	2042.85	2804.82	1160.6	1716.69	10270.9	1726.65	4367.12	2754.61	2676.52	2990.47	268.595
P23381	WARS1	2424.1	1226.81	3993.1	1784.37	2610.97	1353.25	1259.73	2410.85	403.924	612.631	439.072	416.896	883.817	644.975	327.046	2.48547	307.367	1515.97	742.251	238.744	183.479	769.022	1778.61	229.365	1077.08	272.011	293.844	763.498	87.3511
P63313	TMSB10	1272.72	425.863	1470.89	748.591	782.767	523.761	568.844	703.913	67.3415	302.868	98.5693	140.226	315.287	387.076	73.6115	0.777502	105.573	557.591	368.629	98.3438	53.3743	272.856	516.272	107.546	535.021	104.827	104.14	466.391	117.877
P06454	PTMA	7800.66	6063.82	13927	6654.81	12521.9	6552.68	6258.52	6953.38	2196.22	2227.9	1636.29	1035.39	2663.06	2139.69	1069.94	0.290026	1313.03	5623.31	1733.6	1503.15	731.164	3687.21	7182.84	1507.28	4020.13	1266.45	1663.61	2157.46	0
O75369	FLNB	202.548	142.288	305.117	148.407	289.799	101.031	88.5901	227.546	35.7596	24.6803	33.1101	24.6025	57.124	41.136	26.7854	0.981777	19.1539	153.983	137.604	42.1034	16.9764	102.953	190.458	30.6537	81.6257	38.6679	43.7361	40.7104	23.0992
Q9BV40	VAMP8	117.925	97.9279	229.241	76.8056	203.353	58.5515	48.2069	78.6559	17.0315	58.1053	24.4938	11.9643	28.5693	49.1175	14.3686	0.118074	17.7289	195.354	162.664	25.5021	15.4932	62.3535	210.349	28.0209	97.6049	25.6897	27.1653	78.5488	44.4044
Q9UIJ7	AK3	394.233	247.413	703.896	295.705	548.358	251.726	196.462	317.565	127.11	119.534	87.8154	57.3698	136.408	124.47	35.9284	0.359802	50.7692	326.816	117.089	56.7383	27.5804	131.79	352.182	63.67	199.575	61.419	58.9675	139.847	7.836
Q13515	BFSP2	297.854	252.827	539.064	278.458	425.745	191.923	147.623	273.573	45.5091	54.836	92.4108	48.8914	122.725	95.2069	47.6964	0.471422	29.0804	341.52	103.125	49.193	45.9885	134.743	360.705	59.3792	137.661	55.8563	49.4787	73.4734	21.8629
O95298	NDUFC2	3.73912	0.315379	7.75616	1.4726	7.22107	1.78705	1.4321	4.14733	2.86111	1.89138	1.33462	0.727623	1.31235	2.35162	0.698218	6.5224	0.603997	1.71384	1.28669	0.599911	0.155072	1.62317	2.61524	0.138182	2.09969	0.581567	0.816308	2.43416	0.868104
O00194	RAB27B	12.1862	6.51403	22.8604	14.4646	18.2293	5.29591	5.40208	19.7307	3.02142	2.06316	2.19424	1.60501	3.52839	6.79746	1.26608	0.293732	0.718036	9.33962	20.2718	4.12425	1.16124	5.97871	5.15647	0.991826	5.98777	4.01462	3.79102	6.19272	7.7919
Q9UDW1	UQCR10	98.3039	49.0313	190.36	58.3174	173.698	68.4265	53.5375	111.82	31.3831	37.9628	15.8922	11.0105	30.6162	33.1865	9.59113	0.357774	18.2475	81.9642	71.8499	11.3988	7.26621	55.1868	77.737	16.6989	55.5748	8.33318	12.7698	45.9942	24.1764
O43795	MYO1B	91.0504	53.3448	123.041	65.1072	99.408	46.7662	34.9718	70.4774	15.7005	14.0697	15.2492	8.8903	27.8338	17.5069	11.0684	0.686301	8.42447	94.6043	118.638	13.8347	6.75004	71.6729	76.2296	18.466	38.1734	12.8776	11.2778	20.139	15.8221
P17096	HMGA1	344.94	219.876	516.919	249.657	392.795	197.608	162.239	312.067	76.1348	60.3625	50.6223	45.7251	96.376	65.4377	42.446	2.09798	34.7843	212.4	116.261	45.2674	27.3185	116.582	258.371	44.867	132.076	39.4897	52.9352	86.9296	29.2563
Q32MZ4	LRRFIP1	121.752	82.9628	222.213	78.7336	173.888	79.8382	69.98	128.274	41.2042	29.037	18.491	17.9093	38.3782	30.738	16.1329	0.86353	16.9613	88.6047	55.1199	16.1217	8.90424	51.7447	109.752	20.1099	57.9236	15.5287	16.8304	41.3343	10.6049
P11166	SLC2A1	125.337	90.917	152.702	85.4594	148.915	57.6074	65.9448	104.654	17.3077	15.4416	22.6042	9.79695	28.0788	17.5583	18.2861	0.243091	10.8272	106.012	66.3073	16.0931	8.23993	65.5437	113.985	26.3409	64.1572	19.9037	11.0352	19.8784	24.4636
P31941	APOBEC3A	167.268	75.7709	226.616	97.4337	152.796	76.1058	85.9075	111.073	11.5297	55.2507	22.8565	26.8808	65.9583	85.9353	17.6954	1.52354	9.53986	226.073	103.802	18.9793	14.7332	36.2909	223.845	4.46847	120.532	24.5635	25.1288	94.1504	59.0583
Q96GE9	DMAC1	113.824	62.9892	197.097	58.6881	158.401	77.1297	64.41	114.354	31.8264	20.6286	23.6103	15.1464	39.3737	31.0064	10.301	0.194322	24.1875	66.4535	37.687	11.2903	7.52744	50.8485	81.6688	20.3892	60.1981	15.1373	13.4214	37.9672	10.4245
P31947	SFN	6851.72	6025.62	10501	5588.91	8565.74	4121.49	3475.02	6170	1341.51	1249.35	1376.88	848.099	2263.25	1792.21	853.331	0.702866	822.928	5090.98	2017.77	1366.42	699.977	2092.51	6150.85	1096.39	3097.49	1174.17	1419.58	1562.34	131.307
Q92598	HSPH1	218.745	160.514	367.981	178.764	297.71	164.403	121.63	215.635	48.3735	47.2141	47.357	36.8788	81.1477	54.1589	33.1854	0.459252	34.8402	153.918	47.9098	34.184	20.106	66.3468	189.877	38.5958	105.517	33.7318	40.7591	55.4345	8.5841
Q9UHQ9	CYB5R1	130.284	123.831	170.745	81.1624	141.675	52.291	65.1401	100.657	18.9395	13.6337	22.3529	18.4818	41.079	24.45	14.9016	1.29798	11.5938	138.796	88.1836	28.222	8.54409	65.7502	165.303	18.4872	61.2513	22.7121	21.1302	26.2332	22.1084
P42677	RPS27	531.801	431.672	1010.96	314.204	800.039	273.656	271.773	514.44	139.308	99.2884	87.6792	94.24	199.713	138.007	48.234	0.868964	91.4733	390.45	294.967	89.4493	45.5498	252.884	483.935	104.395	282.639	99.4648	93.246	159.996	45.9156
P04271	S100B	33.7264	32.3796	56.1052	23.0327	49.632	22.8575	25.3962	19.6696	15.4316	7.41718	6.44936	1.34607	6.84525	7.18679	6.78916	0.4406	3.41226	22.9122	11.2163	6.96594	1.46215	8.41656	25.8164	6.37442	16.6594	8.49878	5.85109	14.1558	2.45455
Q3ZAQ7	VMA21	76.2466	57.7853	135.263	54.6305	127.585	58.8154	51.563	89.0793	30.2553	12.4212	16.3117	16.7564	17.6782	21.8201	9.45963	0.879755	7.95857	63.5295	35.6429	14.9177	8.74575	37.432	88.1569	13.1189	34.9645	12.6799	14.8073	25.8362	6.48778
Q9BQE5	APOL2	499.637	330.173	942.432	379.628	680.022	315.175	237.086	522.654	105.502	82.1205	103.097	63.8581	200.167	132.889	64.6164	0.969299	50.947	542.005	410.481	86.5436	54.9652	334.185	547.115	99.3513	216.132	93.5218	87.331	133.79	82.5749
Q92478	CLEC2B	60.6144	32.4672	71.0025	37.4935	50.337	29.0246	24.9883	48.1358	8.97608	4.50419	10.8678	6.00178	16.8436	10.4857	9.69182	0.491092	7.43198	32.0184	9.9988	6.42556	4.85908	20.2818	37.134	10.8585	26.4571	8.86666	4.42018	10.4296	2.50025
P29728	OAS2	168.01	117.361	253.765	147.242	207.525	113.534	85.8155	165.92	27.3567	33.3575	34.4534	33.2513	54.6105	39.7014	29.6524	0.374545	15.8428	114.739	38.8419	21.6349	17.2494	55.1544	129.245	25.728	70.8732	23.9261	25.0549	47.2661	10.7523
P00918	CA2	809.04	520.807	1084.1	517.868	851.297	341.05	362.517	805.993	132.455	80.0981	115.572	44.6103	233.106	107.429	95.365	0.798252	83.4052	587.197	745.73	163.781	98.5386	652.213	584.504	175.773	343.789	168.623	176.552	145.735	53.23
Q13576	IQGAP2	73.1473	63.2591	83.4042	50.4621	63.7397	30.9737	42.8524	47.6537	14.0016	11.9376	14.5529	12.3008	19.9495	14.2188	13.7324	1.17496	7.79987	50.6206	10.8381	11.6419	4.63775	18.883	79.5894	7.63377	31.8973	9.75779	9.41883	14.7532	2.47134
P06731	CEACAM5	44.8105	38.6816	97.7037	30.5308	42.9362	24.1166	21.2597	23.6581	2.54032	14.5727	10.4169	7.16033	21.911	21.0043	6.27316	1.69277	4.00075	69.363	25.7292	9.67705	7.16849	14.7356	61.1373	6.60059	25.1273	11.5722	11.4121	21.9798	5.63363
Q86WV6	STING1	136.831	78.7272	198.585	101.3	161.289	76.2961	69.8285	125.081	27.8325	23.9751	21.2416	15.957	38.7347	26.3136	19.1898	1.10363	13.6563	90.1544	61.245	16.6362	9.30807	49.0029	104.481	18.0025	61.905	17.9909	15.9243	34.9661	16.985
P23378	GLDC	149.541	101.556	231.575	114.627	176.659	117.523	95.8645	135.83	37.9434	26.7542	32.2847	16.6716	52.1243	33.9649	19.0374	0.496683	28.1977	95.8754	28.4299	21.3082	10.5928	54.6683	136.306	33.3924	70.2064	23.5676	23.3131	34.9753	4.92241
P09455	RBP1	365.875	170.863	485.951	257.2	363.407	156.324	155.334	290.969	67.62	69.0336	49.0649	37.3971	113.568	90.851	31.6078	1.80257	41.4181	233.868	103.754	48.2279	19.2007	112.334	287.948	43.3266	160.318	47.9034	44.4123	102.44	31.606
P28907	CD38	53.1299	37.3123	86.4045	37.1664	69.9947	23.5415	24.7802	56.8772	12.7861	6.27704	9.57588	6.07409	16.3714	10.7775	6.39555	1.73761	5.96109	43.196	33.914	8.72998	4.618	21.5049	48.9817	7.97287	22.5102	9.27514	7.77729	12.8779	10.0881
Q16762	TST	193.736	118.043	337.404	162.483	272.997	114.189	101.84	202.559	43.2086	40.4564	35.5652	21.7455	64.9686	49.9609	27.906	0.440498	27.2514	153.174	78.2524	30.0936	15.9502	87.3529	165.406	30.2644	87.5814	31.3028	30.698	63.874	25.6945
Q9HC07	TMEM165	12.9389	10.0883	28.961	9.68003	20.7619	9.72808	6.27949	19.6703	3.65601	2.74719	2.58278	1.70301	6.69938	3.47117	1.95714	1.04704	2.6116	8.61376	6.8826	2.8003	1.37467	8.18294	9.27219	2.62239	6.10405	2.62641	3.05114	3.4269	1.21636
Q6ZU15	SEPTIN14	0.479848	0.0592715	0.945852	0.381523	0.760532	0.0442848	0.917111	0.082748	0.00969961	0.69085	0.202055	0.741592	0.143306	0.0146716	0.123323	0.120018	0.421369	0.0453253	0.884622	0.54548	0.522682	0.433473	0.060893	0.236442	0.104849	0.692946	0.302988	0.653266	0.147567
P22532	SPRR2D	978.005	570.95	1820.27	562.638	796.38	209.537	511.319	911.112	111.262	346.096	143.791	96.7413	379.984	221.47	60.2802	0.87125	102.488	857.387	1065.55	207.948	205.309	915.962	732.124	232.478	340.527	126.484	287.573	237.833	144.816
P48506	GCLC	24.3727	10.1732	37.1049	13.4659	30.5599	13.9839	10.6356	22.7071	4.76059	4.21797	3.00181	3.59906	7.54527	6.26035	1.97107	1.14944	3.61021	10.9452	10.2973	1.86016	1.10252	9.71596	14.949	4.03085	12.2822	2.49705	2.5662	6.37343	5.12705
P02538	KRT6A	17598.5	18425.9	23894.9	16547.5	20664.5	7820.53	8817.08	17894.8	2305.94	2899.04	3593.69	2157.43	4999.85	5736.09	2185.09	1.22687	1072.85	16355.2	5270.85	5326.08	2317.74	5795.91	15857.2	2987.74	6410.44	5078.56	5024.34	4004.33	461.86
Q01469	FABP5	2479.16	2004.21	4064.98	1936.03	3549.78	1483.11	1567.87	2734.58	708.867	326.85	486.623	263.103	871.188	565.482	385.977	0.416509	262.657	2384.23	1127.25	506.644	282.409	1290.54	2841.92	399.272	1223.5	505.958	694.254	545.218	219.898
P62273	RPS29	49.7163	21.1814	76.2785	30.5368	63.1601	28.8124	23.3556	41.878	9.55391	14.286	6.92519	7.31806	11.1936	13.5262	6.74876	1.31042	5.38714	31.6955	17.4095	5.16412	3.42639	15.5429	36.763	7.70557	23.7718	5.08863	5.29994	19.5173	4.97848
P20591	MX1	921.334	530.082	1157.34	721.186	918.434	554.136	422.529	743.766	117.157	151.156	157.987	134.155	257.166	184.007	138.507	0.441794	80.4436	580.666	295.867	98.7443	71.0936	287.454	649.248	134.387	366.258	115.928	109.422	220.786	50.6222
Q9Y3E5	PTRH2	12.8424	6.26158	23.3777	6.27177	21.4173	7.10347	7.6469	14.0169	8.05719	3.96962	1.56575	0.999539	2.74389	3.67724	1.53276	0.361096	0.906942	8.87018	15.3856	1.71595	1.80407	9.53054	9.43864	2.62727	5.53187	1.35255	2.13331	5.25405	5.34383
P63279	UBE2I	126.166	86.76	316.929	97.9907	261.329	125.565	86.3062	165.149	50.0437	45.301	34.2727	25.691	61.871	48.4497	17.565	0.285819	29.5011	126.983	90.3926	21.4159	11.8262	90.2314	123.933	31.2224	73.3378	21.6922	33.2985	52.1074	12.8201
P21964	COMT	22.2176	10.6756	25.8619	10.4423	22.4296	7.15832	11.8263	6.58376	10.8338	3.37855	3.67186	1.02219	2.09623	3.48066	2.37335	0.430306	1.27958	13.3094	15.0981	2.77603	2.09692	8.45383	13.8614	1.93458	10.8148	2.45219	2.97805	7.17166	1.93286
P45973	CBX5	191	148.833	266.959	176.442	192.484	131.714	108.925	170.258	32.3774	19.2314	44.0492	26.7786	70.832	36.9676	36.8221	1.18611	29.7626	137.773	27.3339	34.7071	18.153	81.8336	172.709	34.4573	88.9568	35.9605	31.8752	31.9876	4.60382
P05023	ATP1A1	733.911	539.877	1220.26	616.849	968.214	579.974	409.568	692.365	193.663	169.486	186.973	113.346	270.333	191.666	125.634	0.957829	113.607	535.893	139.303	114.992	69.9376	301.051	632.688	157.009	353.256	121.215	121.525	178.46	7.30087
P51151	RAB9A	10.6862	6.45198	30.0815	7.74932	26.861	9.05864	5.87713	20.0754	4.19826	5.59031	3.03152	2.66114	6.16661	4.70364	2.69026	0.56648	3.10551	15.1131	7.50455	2.36081	2.00925	9.48244	14.0865	2.69442	5.51648	2.56864	1.9671	5.71736	2.35264
Q8IY21	DDX60	12.6585	13.4187	36.0645	16.6476	27.278	9.05692	5.60622	23.4372	4.29961	2.55305	4.79108	3.2919	7.5412	6.7821	2.24354	0.534826	2.91894	16.1666	6.2247	3.71753	2.21068	7.98591	16.2527	2.6913	6.94814	5.80159	4.84275	5.45107	1.7318
Q8TDY2	RB1CC1	52.6661	50.8413	69.7284	45.6114	57.7366	19.6912	28.404	37.4153	10.3267	9.16057	11.5244	6.8148	14.6069	10.9605	4.99573	1.30617	2.46692	53.9606	18.1959	8.33081	8.24126	15.0668	48.6684	10.8933	20.0289	7.27675	6.91592	13.0989	6.85986
Q9Y2V2	CARHSP1	116.865	87.5332	199.978	74.837	179.528	72.4593	49.9965	105.63	29.3777	27.4385	23.8482	12.0776	48.2575	29.421	12.6356	0.911035	15.7432	141.226	83.3802	23.5123	8.76178	65.8792	134.345	23.9522	55.1498	25.9941	23.3404	31.0605	15.2927
Q9UHD9	UBQLN2	61.4917	36.6247	91.5557	49.1733	78.2994	36.5016	29.6237	56.572	11.7487	11.6231	11.1208	8.83207	19.3047	11.7522	8.63049	0.620989	8.17645	40.6984	17.5612	7.654	4.73944	24.842	47.7594	11.4269	29	9.38009	9.12039	15.1121	5.23956
P35321	SPRR1A	1952.87	962.448	2820.04	1577.89	1628.08	458.371	819.28	1991.47	211.963	305.66	180.403	192.097	573.284	547.46	134.782	1.84246	109.08	1979.92	2638.15	626.645	421.253	1906.77	1338.11	538.739	640.724	446.211	726.401	551.273	345.679
P12268	IMPDH2	198.322	130.485	311.652	133.939	227.955	134.893	110.622	184.65	39.1904	42.1847	39.3855	28.5215	70.7067	49.385	29.694	0.520561	35.7098	127.593	42.0821	27.1059	15.9609	67.8476	153.05	29.8898	89.2208	28.953	30.0784	50.4813	9.0175
Q13428	TCOF1	95.3724	67.4897	150.146	80.3397	125.841	72.0957	57.4219	81.9899	23.3403	19.213	21.4003	15.5096	30.6073	22.0059	15.1249	1.2573	14.3249	61.5723	19.8515	15.7054	7.03426	32.2651	77.4744	18.0597	46.7017	14.8966	16.7119	22.8221	3.37008
Q8NFY9	KBTBD8	53.0232	35.7523	74.1212	29.8786	50.0236	21.1168	30.2887	58.2957	10.2763	16.6016	5.95078	9.70831	14.8364	7.65185	10.3283	1.43808	3.80303	29.8641	19.8826	7.37063	4.68835	13.8573	32.8024	7.41469	14.1225	5.48493	5.58156	14.8081	5.0183
P29373	CRABP2	331.372	182.479	520.011	240.78	449.005	108.982	144.325	338.316	41.9607	81.7773	32.9153	26.2443	81.9571	121.198	25.4807	2.24301	26.5874	364.359	412.607	105.566	61.6662	302.665	295.285	59.7408	159.684	83.4514	122.881	124.759	42.4701
P09758	TACSTD2	115.809	64.4217	144.454	80.8499	99.3763	52.7386	46.7683	76.8452	14.4414	17.414	21.4769	12.0244	31.8258	26.1816	15.03	0.851475	9.18833	85.5663	29.5715	14.4437	11.3	40.9024	88.3764	14.2671	48.1819	15.4947	13.3384	25.927	6.71084
Q9BRA2	TXNDC17	422.928	258.888	607.511	304.344	522.146	261.731	208.958	346.311	84.4096	95.4817	75.6473	49.3412	127.12	99.9729	57.4098	0.464871	47.579	317.84	165.107	58.1125	34.2518	162.854	360.838	66.7082	200.347	54.9824	63.2906	118.968	24.111
P41227	NAA10	30.1257	18.1968	52.1313	19.5297	42.2441	21.0043	15.1337	31.0038	8.86365	7.64485	6.30795	4.19797	10.3625	7.08909	4.80025	0.78052	5.27798	20.7263	8.79673	3.55914	1.90061	11.8763	24.5857	5.83949	13.927	4.74667	4.61895	8.60495	2.52623
Q9UIV8	SERPINB13	414.453	273.988	535.742	325.591	517.632	147.228	181.761	460.066	61.5448	53.2986	56.2969	29.8244	100.332	90.7975	48.9573	0.882604	35.5602	304.039	249.572	110.992	41.0673	193.59	361.043	74.1934	175.098	101.202	96.7318	80.2314	66.3301
Q9UKM9	RALY	782.293	579.767	1179.51	662.032	888.343	532.291	426.702	661.133	177.63	129.834	169.067	124.045	303.229	185.478	109.004	0.329534	110.397	550.031	171.818	125.445	60.7644	280.327	664.363	141.329	354.547	123.924	124.603	175.755	36.2278
Q9NZZ3	CHMP5	10.6279	6.74818	14.6918	8.40626	13.914	9.7234	7.0102	5.43221	5.58707	2.30312	2.79639	0.427335	2.22452	1.93002	2.33287	0.955688	1.10499	5.93621	3.59779	1.66042	0.650242	3.07752	6.41647	1.44862	5.96881	0.802676	0.9209	3.42852	0.63027
Q96HS1	PGAM5	36.0391	18.5873	51.1474	22.2978	37.6031	17.783	18.252	31.843	7.05095	3.97732	6.62374	4.436	10.8489	7.02556	4.51815	0.260865	6.40512	21.9817	11.9358	3.57806	3.53358	16.3161	28.9332	5.68062	17.1542	4.94213	3.66318	9.2988	2.63651
P35221	CTNNA1	242.243	158.968	369.899	181.133	285.193	155.51	127.031	186.132	54.1803	53.0762	50.2673	31.6935	73.0653	66.4058	32.4025	0.846169	26.6726	166.355	68.0299	36.9587	21.7833	84.5356	181.82	35.1282	108.673	32.9679	41.3051	69.9538	7.12623
P55210	CASP7	11.0627	4.35821	15.966	7.62359	15.9027	5.98625	4.33479	13.3114	2.3679	2.63252	1.13258	1.59148	3.14213	2.89402	1.68582	1.34402	1.48318	6.02335	5.22724	1.59962	0.50945	3.87147	6.01157	1.98187	4.68834	1.13182	0.969506	3.55258	2.40096
Q7L2H7	EIF3M	143.165	88.9251	147.844	106.566	135.951	37.5576	67.8691	109.756	24.3605	24.4605	18.5375	18.0594	22.2187	26.7695	12.2142	0.274372	6.82338	99.0039	61.1697	19.2808	14.8699	45.9982	83.1437	23.941	51.1727	13.4267	14.0546	43.3192	21.4526
Q96SZ5	ADO	444.774	696.338	1048.37	640.343	845.444	525.72	283.919	565.85	193.461	85.6321	260.706	102.707	329.368	277.64	109.584	1.64885	71.0168	455.492	101.465	110.927	118.19	270.349	452.687	118.182	250.442	71.786	146.613	161.508	6.47761
P32926	DSG3	139.402	104.687	224.362	122.675	190.277	79.2807	60.7429	116.782	17.4305	22.2335	37.7186	17.7896	39.51	43.003	23.4732	0.940258	11.4295	118.042	78.2736	19.578	18.6721	51.7508	118.542	27.9467	67.8885	20.8171	19.8487	37.483	24.1086
O95881	TXNDC12	26.6945	17.8078	49.4377	19.0507	41.0973	20.9919	14.2581	31.4164	7.55601	6.03791	5.78928	4.39831	11.1952	7.32078	4.57904	0.254872	4.70024	20.6751	11.8337	4.20126	2.93358	13.6235	23.3462	4.61871	12.4296	4.02714	4.63117	8.54077	2.30269
Q02790	FKBP4	563.672	399.511	819.291	464.531	682.95	430.682	311.742	443.028	117.057	113.782	118.453	79.8262	173.224	131.901	90.2796	2.26139	74.7892	396.558	140.02	91.1501	52.8262	187.729	468.783	102.889	261.75	85.7123	96.8295	137.821	20.2321
Q9UKY7	CDV3	11.9427	4.1685	20.4777	6.05307	18.8886	6.14721	5.50148	15.2831	4.30542	4.02143	2.17892	2.21822	3.49049	4.16725	2.72155	0.539942	2.2902	7.05947	4.62731	1.29709	1.23938	3.58752	9.32698	1.74813	5.94302	1.78399	1.42869	5.80405	1.34399
P49591	SARS1	105.242	47.9009	135.689	59.165	113.075	44.2291	43.6439	89.6846	17.0718	22.4006	12.4782	11.0391	22.8978	25.0368	9.63367	0.854493	11.4187	61.5054	69.7591	11.3804	7.04233	37.6178	58.309	11.4871	46.4096	9.24606	11.2654	32.6303	30.2573
P51161	FABP6	14.3825	4.91717	21.0311	17.269	10.6498	10.1388	7.41589	15.251	4.78382	1.88842	1.47627	1.9633	6.64569	4.86623	2.2488	1.88586	1.59804	5.45399	3.87036	3.83808	0.759223	1.50448	16.5068	0.595499	9.1059	4.45188	6.15171	4.89257	1.04732
O60218	AKR1B10	115.809	81.2885	136.918	83.3658	121.322	49.11	47.7165	86.0543	16.16	13.9399	22.0767	11.145	31.4424	25.227	15.5737	0.51534	10.9893	78.6129	42.7742	15.6551	11.0482	45.854	82.4529	14.6249	47.0727	16.4848	13.6834	24.629	11.9628
P54709	ATP1B3	604.051	476.507	940.716	476.931	757.064	480.039	315.521	559.977	151.684	131.574	164.729	75.1183	218.185	151.531	102.609	0.0593161	98.3372	463.533	130.333	85.7553	58.6315	282.145	504.827	128.957	298.299	102.126	93.5753	139.745	19.532
Q16658	FSCN1	902.751	667.45	1284.6	742.314	1043.16	523.143	481.992	794.358	182.153	190.752	180.81	142.414	277.666	219.365	142.012	1.19968	108.667	659.645	227.664	166.321	66.0541	314.626	812.49	152.111	379.364	155.429	167.378	235.238	28.2973
P04156	PRNP	21.2242	12.1591	38.3118	19.1343	37.2921	12.6782	8.55502	25.3601	9.5151	4.61786	4.03531	3.39869	9.50421	3.98399	3.71714	0.534052	2.80619	20.6455	14.9826	2.94738	2.44879	11.6453	20.3487	3.2074	10.6681	4.89751	4.60457	6.34215	4.3024
O00154	ACOT7	106.877	55.3154	161.912	78.6826	154.073	63.7437	46.6587	105.651	20.4082	23.8032	17.2147	15.4443	32.5326	28.9311	11.8124	1.72342	13.0617	83.0379	58.8115	17.1297	10.3005	53.4237	83.7406	15.2319	48.3098	15.6336	18.9983	35.4205	11.8112
Q9UHB6	LIMA1	73.766	49.1835	109.792	50.4085	108.998	41.9166	34.671	75.1529	17.3544	9.79156	11.5482	9.29726	22.4599	15.4291	11.3231	0.729912	10.8893	61.9701	70.3543	11.8278	5.49195	46.7971	74.7904	12.0113	39.1478	13.2911	12.3802	16.3255	23.5138
P35613	BSG	324.734	241.909	494.186	288.127	379.855	246.636	187.903	270.747	79.2944	47.8254	79.0313	48.2394	118.87	70.4278	55.1089	0.269196	44.6517	238.108	86.8509	53.9375	35.1693	150.169	284.567	68.0171	146.539	56.5713	59.6518	68.7867	5.04901
P83731	RPL24	424.958	289.663	694.472	335.346	530.824	295.206	259.312	394.067	81.442	84.5357	82.8	73.0849	135.149	108.474	59.7105	0.490904	61.7595	318.556	143.748	66.6193	35.0368	173.976	377.307	83.3875	205.142	58.8347	74.5078	119.204	40.4629
P62495	ETF1	147.985	125.2	233.186	127.221	199.643	123.19	88.0578	127.866	34.9119	29.4784	33.8709	22.204	48.1424	32.8331	23.7342	0.713479	20.3207	107.578	40.2258	25.8943	15.8568	64.5535	134.692	32.5596	70.9643	26.4835	30.1156	34.6167	7.65037
Q16543	CDC37	166.812	141.223	317.595	162.248	293.34	159.755	116.576	181.764	49.4292	30.4493	36.6796	29.7869	50.6684	47.4405	26.1076	0.519791	24.9538	167.166	112.488	33.3264	19.1315	110.549	178.612	41.8772	91.2728	32.3773	41.493	51.5662	23.0068
P14324	FDPS	114.428	82.4396	196.372	72.7633	163.991	61.9562	59.0191	128.46	26.3799	21.11	20.4255	16.7216	39.0401	32.2547	13.1602	1.1073	14.7064	114.064	109.11	21.1606	11.3444	83.5248	104.952	20.7242	58.4054	25.0999	22.7901	37.0627	14.6989
O14745	SLC9A3R1	241.364	184.479	403.187	208.479	332.716	174.138	135.764	224.471	55.7497	54.8491	58.1381	38.4049	86.4741	58.7469	37.3094	3.33054	29.444	212.677	82.7052	40.1008	26.0513	116.636	234.001	47.127	110.624	41.2146	44.7852	59.8558	16.5122
Q9Y5K5	UCHL5	10.4255	3.97063	20.8833	7.78308	14.3885	4.85841	3.59611	12.5183	3.24012	1.73838	1.63781	2.87061	3.88303	3.82384	0.246871	0.511506	2.22065	8.42857	6.08915	2.19409	1.24058	6.01428	9.22222	2.06298	5.04057	1.65148	2.45668	4.60462	1.33044
Q9NZ45	CISD1	109.334	74.3648	185.949	67.7117	135.309	81.1191	53.4564	94.202	21.8216	36.2444	18.2119	12.2138	43.7093	37.1214	11.0373	1.08336	16.5225	101.497	57.1466	16.4172	6.50388	56.0008	96.1365	19.4478	48.7152	13.4179	17.3079	43.8652	8.52394
O43278	SPINT1	51.117	29.3752	68.9642	28.813	46.8593	27.8744	21.0173	35.9733	10.6068	9.06439	7.85768	5.10839	14.9888	6.83511	7.0928	2.17062	5.21398	26.6937	13.5467	6.21507	3.68801	12.9653	36.1408	6.77114	14.9572	5.85479	6.5651	9.11491	8.8219
Q9Y6G9	DYNC1LI1	30.7299	20.0207	55.1767	16.6668	43.4162	18.5234	13.2759	33.0204	9.17916	7.23164	6.00263	4.49053	11.5597	7.91906	3.84584	0.742498	4.9625	23.7916	16.7971	4.8701	2.42765	15.7257	24.585	6.27625	15.2294	4.25052	5.19343	9.0733	3.07087
Q8TDB6	DTX3L	62.4392	37.478	108.038	45.3334	84.3052	49.4642	31.7097	57.2674	15.8385	13.6458	12.2258	11.3171	21.7692	16.8941	9.48429	1.17785	9.22958	42.7139	23.0022	9.32911	4.4892	20.8219	50.8296	11.5696	33.3066	8.88981	9.71522	22.591	4.9009
Q9H773	DCTPP1	112.586	51.7197	165.638	71.8954	107.14	55.9374	61.2115	95.4793	17.5567	26.8117	17.3824	13.1378	35.7203	24.0782	16.0787	0.434369	18.4138	67.4363	29.3086	13.5167	8.08398	42.9116	80.2728	16.4328	44.498	13.2432	13.4104	29.9547	13.1314
Q5VYY1	ANKRD22	36.2106	17.6868	60.872	34.458	30.124	12.258	10.6983	34.3211	3.93821	6.9531	3.35282	5.78028	12.2961	10.2672	1.62911	0.781577	4.41707	28.7246	26.9853	8.11396	4.78386	23.0624	22.9013	5.67625	13.5471	7.42018	9.35828	11.0732	5.58909
Q13177	PAK2	147.01	104.412	269.58	104.207	209.15	107.93	81.8222	158.383	43.7325	28.5847	34.6323	23.5512	61.4764	41.0676	20.8529	0.990545	25.8941	125.536	72.6411	23.1478	13.3907	72.4765	140.055	28.7552	69.9078	22.7576	24.0844	43.1636	16.1836
P49321	NASP	127.359	79.8554	209.632	99.2493	156.644	92.014	72.6674	111.694	37.5215	32.3317	27.772	17.329	44.2381	32.9034	18.4912	0.194367	18.9416	80.9093	37.0713	17.8092	9.9157	47.8118	103.869	22.2353	59.7442	18.759	20.8055	34.2032	9.16916
O14493	CLDN4	28.401	15.6494	43.8268	21.6269	38.8889	12.4079	15.0982	28.0601	5.70046	9.53984	4.81083	4.97885	8.94878	13.9648	3.59417	1.19804	2.66824	30.517	17.9703	1.73771	3.35328	11.7558	18.8619	2.06239	15.5936	1.92108	3.19281	17.3656	6.96685
Q8WWM7	ATXN2L	22.8776	13.4652	35.7519	14.5751	31.107	12.0196	10.146	20.5691	5.63135	4.94956	4.69518	3.32495	7.3945	5.69397	4.25471	1.01099	4.01081	15.6064	8.41381	3.10727	2.11135	10.4013	20.7789	3.817	8.77356	2.95093	2.37403	6.53088	1.36429
P05787	KRT8	1347.2	1028.4	1991.47	1169.04	1720.7	1058.8	888.541	1073.75	258.833	362.899	330.725	200.622	399.325	402.639	246.777	1.64125	165.777	1111.56	311.392	308.093	171.612	475.477	1466.68	310.761	657.331	227.189	301.788	346.682	0
P50502	ST13	819.035	570.501	1430.75	694.868	1119.82	667.473	498.109	804.411	196.71	178.09	191.287	150.112	304.022	226.575	130.891	1.10518	123.094	668.33	313.964	134.712	79.5379	404.823	689.677	166.65	425.259	136.57	153.308	236.53	36.7741
Q9Y305	ACOT9	41.7091	26.0593	53.6912	30.7128	38.1139	22.1018	21.8482	31.7059	9.29427	6.21353	8.16329	4.37683	11.4362	7.65729	5.72083	0.841047	4.73525	28.2448	10.9304	5.98062	3.11129	14.112	27.8588	6.49401	17.2074	4.72764	5.02004	9.22596	2.27755
P43487	RANBP1	479.76	392.207	888.558	410.182	707.255	431.574	333.296	506.744	106.947	126.555	118.39	91.9452	199.427	138.379	94.0456	1.21177	83.9075	422.131	143.818	90.7202	47.9502	230.111	474.628	102.249	254.469	92.8922	105	146.171	23.6391
Q9BRX8	PRXL2A	83.1251	56.4415	94.1965	59.5918	86.5284	31.2935	33.3016	65.7662	11.4407	8.90779	11.4895	6.11768	17.7522	18.5506	9.40033	0.971856	5.61888	51.7823	33.6407	16.9336	7.28743	28.3948	50.9898	11.0324	31.8932	16.0494	14.3753	18.5769	10.564
Q16643	DBN1	69.9152	37.7916	119.291	57.2351	93.5423	49.235	39.1959	52.4063	18.2631	20.2805	12.8177	9.18377	21.9452	20.5208	10.1333	0.354082	10.5798	56.539	37.7188	8.59037	5.37624	34.3175	56.2609	12.6604	41.3003	8.84798	9.94028	24.6953	5.7214
Q9P1F3	ABRACL	48.9937	43.2396	65.982	25.7161	45.0992	20.4809	26.2466	24.0955	20.2332	8.41869	7.10259	5.27185	7.38602	10.504	2.47727	0.443694	2.88732	31.8168	28.3423	8.1954	4.569	17.2929	37.6004	4.81308	24.329	7.99404	7.00247	19.4226	6.52416
P52292	KPNA2	128.139	109.068	209.056	116.896	175.595	120.427	77.1658	120.127	31.1766	25.7978	33.0867	22.7674	40.6635	29.3612	25.5098	1.42758	23.5644	98.0305	36.7259	21.164	10.8589	62.0827	113.468	30.103	67.8363	23.2232	25.0235	33.6733	4.59855
Q7L1Q6	BZW1	79.1784	71.8642	143.16	62.0106	109.537	59.7266	50.4453	72.8684	17.9122	17.8326	19.7106	15.9671	25.6425	22.9333	12.8859	0.650132	10.264	60.2932	33.684	14.6778	8.35573	32.1066	79.1695	11.922	37.8343	13.6649	16.3506	24.3652	7.92735
P20810	CAST	125.964	68.8605	183.599	92.6596	149.596	59.5056	59.1641	103.143	27.484	27.1782	20.6279	14.4276	30.3479	30.3694	12.483	0.872806	12.8125	82.4152	82.3479	19.0527	10.8611	53.8506	92.3482	17.059	55.2117	15.7054	19.1296	37.3256	21.0881
P20042	EIF2S2	253.492	187.323	348.353	202.616	297.949	174.292	161.567	214.316	48.3304	50.0609	53.7906	38.4345	74.3409	50.4618	47.7388	0.776651	30.0452	168.533	51.6131	38.0123	25.6532	100.086	196.009	51.1165	104.47	44.7552	45.3974	60.7571	10.6318
Q99460	PSMD1	115.876	76.7566	198.222	89.1069	154.632	82.8444	65.0958	109.26	33.5983	31.4959	27.3045	14.0773	37.8679	34.7671	16.7004	1.0618	17.5415	86.3702	42.825	19.7566	13.1102	49.0442	95.2588	17.0026	51.5585	16.0528	24.013	36.5998	5.37002
P12004	PCNA	412.123	287.313	582.729	324.037	506.612	294.322	238.891	311.242	107.43	97.4496	96.3731	60.251	113.822	96.0555	67.3653	0.964918	56.0052	268.05	86.2966	63.0152	35.8011	150.14	325.749	73.8713	190.815	63.5558	73.0926	104.135	13.0097
Q96A49	SYAP1	14.362	8.22064	22.7093	9.82006	19.935	10.0344	6.74852	13.8019	3.41275	2.94999	2.92525	2.71721	4.83948	3.96713	1.91051	0.113779	2.20348	9.71651	4.50181	2.24214	1.26235	5.79975	11.6626	2.69019	6.80059	2.10575	2.21144	4.05163	1.60171
Q9NZM1	MYOF	115.331	81.8614	223.258	99.6069	154.007	73.273	63.5042	156.086	36.9336	34.8823	24.8319	18.657	53.805	29.7701	20.6406	0.0441014	16.383	115.244	44.7142	22.7971	12.5552	68.3255	107.175	24.5415	55.8841	22.2119	27.907	35.6899	11.27
P60903	S100A10	2170.75	1482.9	3688.37	2094.62	3160.44	1239.15	960.284	2728.16	447.856	595.9	448.87	310.671	735.029	957.712	277.735	1.28853	192.35	2113.2	842.827	643.859	249.115	809.897	2023.79	322.276	983.345	586.058	633.6	779.845	302.382
P82979	SARNP	225.97	176.142	360.649	192.761	322.825	181.299	148.085	198.096	62.5621	53.5006	51.7527	34.9489	71.876	54.6025	34.8038	1.53427	31.8824	178.18	90.6343	40.9219	20.8732	112.523	213.61	51.0147	114.995	39.4912	48.6918	62.8738	5.5371
Q9GZT3	SLIRP	75.2014	58.9588	150.32	63.6971	119.228	74.3262	41.6593	75.1599	23.2384	24.3834	19.444	12.9288	26.3217	23.1215	13.5583	0.78145	14.674	72.4659	30.1493	12.2048	8.33378	41.2044	76.2502	20.1793	44.0708	14.2349	15.4311	26.4301	4.16108
P52594	AGFG1	23.3301	13.1843	46.1735	14.5987	32.2771	15.6432	8.0348	16.9985	10.6212	4.39778	6.08096	3.39114	11.4788	6.0346	3.94305	0.770815	3.63149	20.1313	5.66669	3.92431	3.152	9.42521	22.7851	4.28373	10.6229	5.05551	5.04057	7.04445	2.32199
P67809	YBX1	998.086	810.754	1667.58	910.617	1386.08	882.261	631.138	856.598	251.467	249.816	253.863	199.331	333.63	271.596	182.876	1.05634	140.745	752.42	234.501	187.849	108.147	401.49	847.756	221.465	511.682	191.166	225.267	280.514	28.966
Q99614	TTC1	50.5276	31.5288	92.3559	40.9927	79.8762	39.644	25.259	64.4225	10.6355	11.2495	10.8735	10.6092	16.9552	15.8546	7.37974	0.81843	8.84873	45.0482	36.0644	9.90151	3.93762	35.4877	44.4604	9.83314	24.2369	10.5563	10.8826	18.7668	5.96443
P54819	AK2	386.041	266.879	643.47	284.256	469.963	254.951	234.1	360.36	85.1501	82.1833	84.2374	53.4145	142.068	103.418	56.6752	1.03763	57.2955	297.514	145.845	63.6465	36.6142	186.345	365.274	65.7866	175.619	65.1473	72.0899	112.093	28.3825
Q05519	SRSF11	25.3342	13.0627	38.4503	11.7414	30.0962	14.3391	11.8443	12.763	9.92149	6.94244	5.1449	2.59529	6.01571	5.80395	3.79288	1.19209	3.57914	15.7769	4.80676	3.92247	1.58887	6.30364	18.5554	3.88854	13.0135	4.2852	4.16196	8.606	0.802648
Q96AE4	FUBP1	370.331	287.107	624.808	344.549	522.869	277.656	243.832	356.102	99.5677	92.7438	88.68	71.7798	135.958	116.248	56.5116	0.937512	55.246	293.208	92.1807	81.6973	37.9046	169.955	352.003	78.6805	181.61	77.0232	89.4914	115.27	3.80984
Q9UNF0	PACSIN2	54.5145	37.539	103.216	44.3306	94.9634	43.1841	34.3545	65.1178	13.473	15.7603	11.5308	9.44968	23.6394	19.1165	7.79071	1.01059	8.35086	63.8019	54.7821	10.4673	5.04333	43.0726	61.4947	11.6095	30.7526	9.65413	12.7541	20.701	8.83875
P43155	CRAT	22.6123	13.9027	25.2398	16.3436	16.2784	7.50774	8.34352	15.6198	2.96363	3.9619	3.53262	3.3652	5.71044	5.51259	2.05172	0.568035	2.35307	15.4109	5.57237	2.93703	1.99439	6.24569	13.667	3.53712	8.1908	2.10017	1.51105	6.52912	1.56405
O76003	GLRX3	141.337	90.8457	198.163	108.155	164.25	91.3216	78.0208	109.047	30.3455	32.1805	28.3375	20.6157	39.4052	27.8654	19.9141	2.10343	19.6153	91.9485	34.3723	21.0544	11.6102	54.5766	104.432	25.3488	58.1953	18.6327	22.0047	32.9458	9.96868
P15408	FOSL2	21.6331	20.4323	30.0139	17.1724	26.3551	11.9325	10.4472	15.2497	5.02397	5.00562	4.95017	2.18091	5.17841	5.16136	2.96499	0.0295882	2.47743	14.3557	8.27115	4.06591	2.31453	7.79433	17.9454	3.62415	8.38473	2.88069	3.95814	5.22738	2.36433
P34897	SHMT2	157.077	121.053	211.37	122.113	185.981	109.543	94.4427	117.088	35.0808	35.8985	35.1206	20.8192	49.0976	38.5945	26.1809	0.258639	21.6319	127.048	32.5712	26.064	13.1644	56.738	139.668	28.0903	71.7117	24.6416	23.7331	41.1805	9.1004
Q9BXK5	BCL2L13	25.9434	21.7576	29.1048	27.8413	23.7007	17.4987	14.3605	21.7799	4.60134	3.13948	5.20814	3.61717	6.04561	4.16269	3.78958	0.22758	2.43234	21.0804	12.8346	4.94011	2.20589	15.5825	20.0744	5.17848	11.2438	2.91	3.23585	6.42773	2.77582
O75475	PSIP1	322.771	281.11	581.248	317.864	441.961	307.6	245.925	223.531	111.78	88.8873	86.84	56.3591	108.181	96.7958	59.9565	1.60285	44.3172	249.074	73.512	73.1587	33.5421	119.947	275.123	74.9994	179.428	76.7752	79.4805	109.581	0
Q6DKI2	LGALS9C	0.517838	0.0189627	0.98903	0.132961	0.402379	0.0570823	0.784631	0.000534822	0.862165	0.192629	0.0852006	0.24726	0.131936	0.480272	0.407025	0.153706	0.134948	0.684534	0.84426	0.343544	0.841709	0.0819768	0.0966214	0.786521	0.467245	0.0492616	0.411936	0.878784	0.495354
P48643	CCT5	198.207	171.754	377.535	155.75	255.428	137.631	138.449	227.141	57.5493	36.2097	45.3694	30.3008	83.5078	48.1857	27.7521	1.95318	27.2984	192.599	98.9522	53.0927	30.849	84.627	297.04	53.7761	149.662	40.3837	52.2933	57.9865	22.7301
Q9Y3Y2	CHTOP	84.4665	52.3621	131.37	64.9309	104.515	55.8999	41.5511	71.2758	19.7586	17.9918	16.4643	12.8879	24.6939	20.0986	11.5141	0.30293	10.785	60.2349	27.3192	14.8697	7.40857	32.7365	66.8283	17.8911	40.0755	14.6484	16.3315	22.3872	5.36175
Q9GZZ1	NAA50	77.4756	53.7143	118.111	55.8518	99.7825	55.3853	40.4371	69.8126	19.2739	16.4424	14.3332	10.458	23.006	16.7876	10.3581	0.536862	13.8793	53.0816	30.8687	12.134	6.39877	33.5843	59.4327	16.1929	37.6441	12.4395	14.0062	20.362	4.48017
P29966	MARCKS	388.074	268.536	666.657	296.344	510.393	248.795	223.029	382.262	88.698	91.1539	72.8863	54.8764	138.439	88.8901	52.1571	4.14161	56.9596	304.67	172.624	69.7473	37.1713	206.343	366.092	82.9249	177.873	70.2221	76.3163	97.8987	44.199
Q02487	DSC2	34.1737	29.0382	58.6058	29.8088	53.6843	20.4641	17.3765	37.4351	8.81629	7.39289	9.26862	5.96702	11.0861	10.7212	4.99486	0.754729	2.82388	30.1216	18.9641	5.98001	4.78589	17.1093	26.7861	6.25888	15.7657	5.72297	5.59275	10.643	5.62803
Q13283	G3BP1	382.629	323.208	545.438	312.007	462.781	284.536	234.207	316.582	76.3723	95.7276	83.9258	65.0277	110.731	91.6049	67.7943	0.605258	52.0593	248.013	83.3596	70.7033	38.2718	127.304	302.204	74.3064	186.354	67.4683	74.9505	102.683	8.80885
Q16740	CLPP	15.2551	7.7657	30.9998	12.789	24.8699	10.5106	8.37808	14.0665	6.66038	6.69857	3.70543	2.99688	4.5984	5.2469	1.76664	1.47854	3.16034	12.454	6.93792	2.4119	1.45294	7.42777	13.1622	2.49883	9.099	1.18149	1.76185	7.13799	1.71925
Q01130	SRSF2	663.523	500.802	1031.8	551.614	831.793	479.381	430.343	451.331	195.977	153.712	135.765	96.7945	201.512	154.764	109.141	0.395586	57.8983	472.356	204.413	129.326	60.1903	239.33	599.113	128.29	288.451	112.837	147.224	192.41	42.0601
Q9Y371	SH3GLB1	36.3375	17.8518	62.0575	25.1678	44.6651	21.7355	18.7294	35.0417	9.26874	8.19439	7.78351	6.85022	13.9252	11.9232	2.47718	0.653558	5.42399	26.5138	27.2822	3.89812	3.34066	19.9197	28.6699	5.78966	17.8364	3.6241	4.51673	14.4461	5.34967
Q99417	MYCBP	71.8095	50.2977	131.218	48.2004	111.635	60.1183	40.9135	78.712	20.3277	16.7343	16.1847	14.5636	26.0005	20.04	10.7291	0.780081	13.9587	60.9243	35.1816	12.8758	7.25837	42.0496	70.5229	16.9559	38.7764	12.3038	15.3002	22.0845	4.69139
Q86UP2	KTN1	151.183	134.205	284.437	123.14	238.23	115.062	89.876	169.03	45.6015	33.6172	37.0199	24.3633	57.997	41.7707	23.2412	1.00749	20.6099	130.846	86.3458	32.413	17.7034	74.8684	139.588	32.4442	78.1231	30.4554	35.1706	41.8756	17.9349
Q96E11	MRRF	32.4732	28.7076	69.9366	22.7306	43.0581	24.2839	24.5214	53.4494	21.9802	7.79613	6.79436	6.99011	11.7046	7.72662	6.64752	0.647362	3.84499	24.4725	26.2184	6.6105	3.8401	11.3107	29.7364	6.33837	12.9545	5.83714	7.21008	10.7112	11.415
P16615	ATP2A2	402.08	256.866	552.721	305.839	477.096	237.428	203.845	344.625	73.8386	80.3422	67.0119	55.1121	115.183	99.0487	52.3499	0.378124	41.7196	313.164	197.796	63.637	32.7034	189.356	320.232	68.2276	181.339	63.9019	72.3868	116.27	30.6329
P49773	HINT1	266.94	192.916	453.809	216.641	387.875	179.962	159.082	268.667	77.3031	62.2278	53.0472	40.6224	93.6594	69.1725	42.9456	2.0128	32.5417	212.783	132.701	50.0937	24.6408	126.21	248.267	48.2373	123.657	44.2218	50.9203	83.0458	35.3459
Q12846	STX4	5.98555	3.04001	13.8291	3.71403	11.8317	5.59284	2.7161	9.554	2.34534	2.28083	1.73262	0.958086	2.94714	1.36814	1.18918	1.48733	1.3524	6.67348	5.44654	0.959122	1.213	4.1955	6.13797	1.32065	2.64956	1.0491	0.925635	2.13696	1.61009
Q7L3B6	CDC37L1	21.4355	10.1695	31.4418	15.1267	24.3528	13.2639	9.44265	18.1712	6.02915	6.53765	3.72419	3.66212	5.84008	5.9664	2.56149	0.495053	3.69864	14.0019	6.58696	2.38823	1.51839	7.26906	13.6645	3.57471	11.6908	1.60555	1.63649	8.58547	1.86585
Q9Y6K5	OAS3	197.004	145.662	272.144	183.023	229.638	135.083	97.5781	156.958	33.8868	43.4316	41.6868	33.3019	59.3885	49.9696	33.136	0.774303	20.033	155.504	57.2853	28.9007	19.6605	70.3274	158.684	34.8923	86.9917	29.6564	34.3552	54.2645	16.9269
Q9UN86	G3BP2	14.0023	8.42888	29.1877	12.2719	21.4181	11.0353	8.06674	18.7408	4.41444	4.09195	2.73058	4.20219	7.39222	4.63021	2.28548	0.646631	3.98677	9.90045	3.89582	2.29834	1.47414	6.72127	11.3574	3.07633	7.06052	2.02235	3.543	5.04655	0.954981
Q02750	MAP2K1	71.6881	39.116	111.238	59.7352	83.5602	46.6107	35.1038	66.8243	14.7031	15.6398	14.1929	10.2766	23.1594	18.7842	9.4136	1.05947	7.94231	58.1689	32.7318	11.7765	6.40479	30.2688	60.4452	12.7349	36.8736	10.3421	12.0463	22.9624	6.15117
P22531	SPRR2E	93.63	78.8408	189.346	72.1421	86.3155	33.4227	69.9969	89.4289	18.3814	30.9054	21.5955	11.6828	39.5096	19.645	6.23766	1.94856	10.9291	100.335	90.7499	19.5715	19.9097	100.007	75.8728	29.7439	38.6704	15.7832	28.2887	21.7028	13.5888
O75844	ZMPSTE24	64.143	20.2074	109.856	36.8769	66.4306	44.0377	27.3262	72.4291	14.477	21.4673	8.43602	15.3679	31.1685	8.72349	10.5803	3.60988	9.36237	68.9685	18.0925	9.78562	9.06676	33.046	36.5545	13.549	19.0512	15.6422	15.02	17.7138	3.55013
Q9Y241	HIGD1A	206.895	122.838	407.061	173.883	325.332	141.856	127.286	234.639	48.4776	49.9463	39.0348	27.0265	79.0426	62.4577	36.4843	0.486754	28.5512	209.404	223.637	48.4769	21.944	160.367	176.792	46.6962	95.1181	47.0089	49.0994	91.7129	40.2593
Q06124	PTPN11	20.8147	15.0259	25.5689	13.4407	18.1073	10.9535	8.53022	14.1648	3.86702	2.58146	3.94479	2.59792	6.34378	4.65619	1.91644	1.01922	1.86731	20.1675	4.7203	5.09474	2.63375	4.67739	24.3466	4.0326	10.7566	4.23254	3.47915	5.38595	1.89558
P09382	LGALS1	1330.37	951.265	2592.36	1103.12	2287.79	1000.36	813.486	1487.84	432.947	390.529	300.423	221.978	499.513	442.442	204.537	1.18819	168.211	1758.48	2431.15	276.07	156.795	1403.11	1467.76	305.148	714.619	312.81	358.956	519.546	1042.75
Q13561	DCTN2	127.632	114.556	212.402	96.1906	176.608	74.5369	69.8443	129.484	36.5234	22.671	24.4495	17.3498	41.071	26.3696	18.4555	0.923019	16.1414	125.202	178.294	26.0557	13.0231	111.204	108.284	27.157	60.3885	28.4335	32.9402	36.4236	37.13
Q9Y696	CLIC4	260.142	193.723	422.732	227.123	368.508	148.636	148.464	276.803	72.5704	55.8813	49.7594	40.3445	94.2252	58.5137	41.7176	1.07508	25.1272	365.227	411.553	56.8007	30.7728	296.762	315.616	63.6097	137.953	76.1331	65.6373	86.8852	124.413
Q9Y5J1	UTP18	7.566	11.6838	40.6601	10.6042	21.2809	8.72352	9.43157	32.8592	9.04511	4.23148	3.26487	5.33651	8.27866	4.52468	3.50697	0.692244	2.61695	19.0339	18.3575	2.75423	1.52502	12.7459	14.6722	3.47022	8.47952	3.47006	5.45092	7.06568	16.5759
Q0VD83	APOBR	9.31066	10.1386	25.1272	5.96449	23.4259	7.79047	7.58927	18.6118	6.65672	1.9615	1.69901	1.35117	6.25087	2.81698	1.06851	1.4859	2.47903	14.7221	23.332	4.48034	2.08978	9.73111	16.4318	3.64955	6.63987	4.10106	4.55344	4.41716	7.89771
Q9UQ80	PA2G4	901.766	731.29	1343.27	766.772	1127.09	693.168	576.034	707.081	189.054	202.742	203.409	147.548	277.907	224.423	145.089	0.28826	115.373	743.626	327.661	166.869	96.4954	430.853	830.513	182.373	442.114	162.808	180.463	243.999	27.2492
Q8WXG1	RSAD2	17.8532	13.888	34.7421	11.0091	25.3168	16.4399	9.63753	14.4492	2.68467	3.71512	5.06566	3.17226	9.75935	7.61148	2.47326	0.352134	1.31265	15.3456	16.2986	2.6749	3.79803	5.72056	22.1793	2.24259	9.43666	1.66692	4.0648	6.73479	15.5272
Q9Y314	NOSIP	12.014	7.03345	21.353	8.81465	20.0362	9.85881	6.8958	11.8252	3.84645	2.89088	2.55989	1.81763	3.55238	2.90726	1.85648	0.532449	2.63412	8.93328	5.91051	2.55333	0.898915	6.59772	11.0529	2.87046	7.11255	1.42165	1.82817	4.31942	1.74919
P06748	NPM1	3960.86	3058.98	6202.57	3449.8	5028.47	3337.52	2561.85	3038.4	1051.27	960.134	963.015	630.716	1124	1028.29	667.867	1.26072	405.075	2931.99	976.725	754.441	368.266	1383.3	3288.46	788.207	1920.31	809.407	883.98	1137.94	285.497
Q9UMX0	UBQLN1	143.935	96.9914	209.989	112.112	193.648	95.5762	84.4255	121.798	34.476	36.9413	30.3861	18.473	37.9275	38.2819	20.2345	0.548637	19.2225	99.1585	49.3503	25.8974	13.3141	55.827	117.493	26.6321	67.29	22.8888	28.3494	41.7663	9.74522
P14902	IDO1	209.163	83.5726	385.539	127.6	207.506	83.8575	91.4292	255.618	40.9371	44.802	26.6541	27.7953	93.4816	43.2702	27.582	1.11638	30.0187	153.874	230.693	63.5074	33.873	152.084	170.225	51.7158	76.4768	55.7215	41.4513	77.0924	34.2307
P15170	GSPT1	42.2332	24.8459	68.4716	30.1073	53.6463	32.6185	19.865	42.0534	11.2865	7.92559	8.93865	5.98674	17.0994	10.6746	5.15742	0.826829	7.77477	34.3401	21.3885	6.46658	4.0496	22.0417	35.2732	7.95939	19.8299	5.89808	7.61044	11.6162	3.24282
P19971	TYMP	4761	3318.71	7795.52	3750.92	5843.77	3029.78	2815.76	4479.78	1109.91	1013.11	1074.11	636.528	1744.91	1178.38	769.255	2.32845	579.499	3774.58	1762.46	798.015	546.008	2142.6	4135.61	894.694	2195.95	895.756	867.64	1286.95	464.874
O60437	PPL	301.817	204.588	415.172	207.241	301.081	112.004	133.552	256.024	36.5956	45.5605	39.5637	33.4837	80.5396	66.9023	30.8688	0.528126	22.8059	260.664	342.278	79.0662	57.4363	237.349	229.894	64.3368	111.475	53.2029	91.3109	74.5409	55.4703
Q96ST3	SIN3A	13.372	5.73502	28.8474	7.31619	22.0283	5.22602	7.36145	11.913	3.03461	24.241	3.43901	2.78789	5.65275	7.58834	1.69154	0.748207	5.63027	16.1085	9.56756	3.05509	1.85588	18.5806	11.0829	2.5732	7.38394	2.21593	3.20483	5.29774	3.64964
Q99959	PKP2	28.6764	15.6051	34.1745	16.6807	24.6956	11.695	12.7376	20.4633	4.31766	4.62338	3.68047	3.01154	7.69766	5.42037	3.58323	0.342888	3.61996	16.6337	7.14276	3.60279	2.84348	7.96598	21.1264	4.01273	11.1341	3.4358	3.92074	6.41066	3.92995
Q8NC51	SERBP1	794.269	589.749	1401.62	627.484	1118.22	614.388	533.647	758.025	220.024	189.67	192.62	124.109	286.378	206.183	111.366	0.693496	126.556	596.665	437.42	151.793	82.6101	433.891	732.704	161.964	394.253	135.098	156.06	239.015	60.8356
Q9Y6N5	SQOR	342.097	274.581	560.677	287.778	426.85	227.182	182.435	310.786	63.441	79.7212	83.4571	61.7348	136.378	111.327	49.3288	1.04269	38.1691	360.562	136.006	72.799	43.7594	163.473	375.926	66.3876	154.981	78.1824	86.5422	100.409	13.0166
Q8IXI1	RHOT2	11.6009	5.82487	17.6969	8.95479	14.3565	6.77662	5.70832	11.2011	2.56415	1.65454	2.35448	1.72045	3.8389	3.76228	1.79649	1.31441	1.60413	6.45332	3.19944	1.39782	0.76985	5.07674	9.41773	1.89558	6.07344	1.55323	1.89373	3.30213	0.95941
Q15459	SF3A1	108.849	80.502	173.993	95.04	142.571	82.2441	64.8796	88.6065	27.8046	30.8884	24.4431	17.8567	36.588	31.0121	16.2905	1.34096	16.5131	79.6724	28.1991	19.8833	9.46549	42.5876	91.1316	21.4922	53.1532	18.9235	23.1567	32.1024	3.63202
Q92734	TFG	217.522	180.188	382.57	211.767	283.676	162.047	118.728	235.575	48.2348	52.4167	53.6719	34.2751	88.6911	73.95	34.2567	0.814296	24.8831	198.027	98.1389	42.0574	26.8871	95.2134	166.073	38.0776	102.915	39.3609	41.5276	64.0605	28.3969
Q969Q0	RPL36AL	81.3837	56.0225	131.725	58.3581	95.0564	49.6175	44.6471	69.9185	22.8695	16.8019	15.3692	11.4139	25.9693	18.865	10.0733	0.942002	9.35354	57.593	30.2001	14.3216	8.18853	34.4343	69.5453	15.4142	38.2961	14.3008	15.899	23.9672	5.76641
P16989	YBX3	230.716	207.496	315.459	179.218	280.932	125.451	137.901	171.672	52.6205	46.0555	46.1956	42.0085	52.4706	46.2305	43.7889	0.133099	25.1522	188.498	105.859	45.0512	20.2104	108.844	234.323	44.0841	110.077	39.811	43.2776	52.5132	18.9248
Q9HBL7	PLGRKT	522.378	289.342	874.897	472.573	662.99	322.576	308.969	543.308	119.87	139.248	129.235	116.601	181.557	202.733	72.203	0.195938	68.5115	439.222	147.472	100.047	68.5951	219.536	487.988	93.197	253.131	66.3712	93.2197	216.418	38.6765
P37059	HSD17B2	7.25669	4.96816	17.7255	6.24641	5.60395	3.67113	3.42983	14.1477	2.68602	2.42922	2.05126	0.482348	5.25633	1.95671	1.45408	0.298182	1.1667	4.24389	8.52732	2.31993	1.41646	2.85312	2.91652	1.9304	3.81927	1.83632	2.26694	2.06886	5.75932
O43583	DENR	102.867	88.1214	184.59	83.2266	148.779	74.8285	60.2843	101.01	25.739	27.3739	22.7101	17.5308	38.2702	31.7109	15.2277	0.796938	18.8261	87.4703	46.6668	19.4456	11.3026	52.6345	98.1862	19.5065	55.4982	18.6764	20.227	31.5171	8.59491
P38919	EIF4A3	482.58	370.294	722.351	417.367	562.563	328.741	270.36	415.678	115.596	101.846	115.256	69.6658	171.779	120.372	72.8693	1.22286	61.0733	365.996	133.156	91.8932	51.7139	186.941	401.467	98.9864	205.615	91.5601	102.176	112.148	19.0231
P22307	SCP2	130.835	104.422	230.792	109.698	181.735	97.5239	80.1851	120.864	34.0275	35.3456	31.2511	24.1158	52.581	43.8382	21.172	1.72378	18.3303	121.902	38.9133	30.201	14.4985	61.7312	148.432	27.8032	66.4696	26.4167	32.2104	44.2031	3.766
P09497	CLTB	227.042	156.727	338.38	167.225	263.319	133.874	115.021	178.251	39.3727	45.9198	42.2309	28.8311	64.8726	54.6915	24.1162	1.61193	23.9038	202.722	227.181	39.6402	23.587	158.552	180.274	38.7514	104.744	39.0173	38.3617	69.3994	40.5781
Q96A08	H2BC1	189.894	164.984	480.952	173.488	437.773	101.517	214.99	234.124	24.8038	88.171	50.5854	40.0301	90.2598	101.745	43.3042	0.89996	28.4797	260.235	136.258	40.9108	33.6086	156.159	209.601	44.741	119.116	58.6043	53.6936	137.005	100.358
P47929	LGALS7	4058.6	5313.76	5594.6	2749.49	4274.94	1813.31	2256.28	3613.97	827.561	603.045	830.721	300.389	1237.66	959.213	442.3	1.8245	312.256	4184.58	3925.78	1476.73	890.907	3216.14	3613.45	1003.37	1730.67	1189.39	1482.54	787.265	248.381
P23193	TCEA1	65.3669	52.9196	99.3043	48.7943	65.2371	39.5051	36.0573	53.4611	13.877	12.9172	13.459	12.0551	21.8775	11.7829	10.2003	0.420819	8.10108	49.2847	24.8323	10.9253	5.02069	25.3088	59.0135	12.5403	29.5926	12.0061	11.8889	14.3767	4.94463
P49902	NT5C2	12.8568	5.18597	17.9445	7.9561	17.0723	5.51875	5.92487	11.2009	3.14873	2.39938	1.77208	1.49372	3.49811	3.76961	1.15134	2.33027	1.38107	6.74608	4.55401	2.13417	1.04886	4.94972	8.446	1.36691	6.54085	1.77704	1.46831	4.45777	1.56538
P53396	ACLY	90.7318	72.6295	180.776	71.5473	143.818	69.0404	65.8539	106.514	27.9097	23.2832	19.9779	18.4619	37.2233	29.0846	14.7407	0.416256	15.4422	81.9018	43.2715	20.795	12.0305	42.2848	117.499	17.7819	56.2808	18.8388	22.5932	32.2548	15.292
Q9NPL8	TIMMDC1	4.68659	3.02571	11.6098	3.00586	10.1891	3.39548	3.22259	6.79632	2.2129	1.48249	0.919652	1.08726	2.19286	1.77179	1.04766	0.802529	1.05163	3.59122	2.09494	1.36383	1.1215	2.26641	4.00755	1.16713	2.89198	0.663762	0.604436	1.98342	1.34004
P55327	TPD52	271.198	180.539	381.535	218.946	285.515	142.226	126.686	262.575	43.8029	30.7446	41.0983	27.4948	75.7541	57.9326	28.6113	1.46218	34.6128	190.915	204.573	62.754	26.0797	158.839	225.572	56.7711	94.4499	42.4776	61.0645	62.2295	63.1991
P78318	IGBP1	42.937	29.1145	69.2626	31.8065	57.5068	28.0215	20.025	38.2284	11.8537	8.70188	9.31733	6.90677	13.2461	11.0132	6.77846	1.73014	5.75058	29.1709	16.325	6.65978	4.05018	14.8557	36.5699	8.35368	20.2507	6.058	6.48976	12.5201	5.30924
P32320	CDA	9.42102	14.0289	37.0851	9.0417	14.2307	5.01156	7.95021	21.7572	8.29886	2.08981	3.41193	1.573	8.32315	4.53097	0.812083	0.879974	1.39926	18.9088	33.3613	13.5337	6.68172	17.0829	14.3261	12.2576	9.09705	12.7139	7.09824	11.4903	0.461722
P33993	MCM7	113.02	77.5662	174.984	94.6577	144.568	91.2476	77.001	80.076	34.4924	31.0881	28.9032	15.6492	32.8136	32.9011	18.4997	1.09033	17.209	83.6284	22.3769	21.8946	12.1962	50.5787	92.9055	23.5916	57.2027	19.9421	22.9493	34.8007	0.513111
Q96F24	NRBF2	34.0776	29.4149	59.2872	28.6754	50.6525	24.4592	17.9261	27.952	10.4268	8.68668	10.1063	3.08076	10.9728	10.749	5.66038	0.912539	3.58909	31.6892	15.0529	6.30107	5.58175	18.5339	31.6807	6.34104	15.538	5.0079	6.54619	11.3499	3.70025
P23588	EIF4B	191.244	148.929	326.132	162.135	272.748	138.878	120.074	176.443	47.4773	41.9014	40.9115	32.4492	65.4565	46.8408	30.065	2.13988	30.5398	151.264	83.292	34.3193	19.4443	96.8673	172.433	42.8553	98.3327	32.6133	36.8835	50.9356	22.8116
P05026	ATP1B1	127.89	88.9286	216.504	122.816	168.24	91.1864	57.8723	120.926	28.5251	21.7764	28.7121	15.3487	44.5355	37.9496	21.3366	2.1102	15.2257	94.1358	64.975	25.7981	12.8247	65.0015	106.636	27.1553	54.2328	25.1139	28.4224	32.1578	17.0552
Q9Y266	NUDC	285.916	252.352	524.474	288.997	431.451	280.183	186.106	287.618	69.871	76.8261	72.304	59.2674	114.62	78.1689	55.1427	1.24738	47.2201	282.249	146.018	66.0524	30.2289	147.683	299.381	75.9194	145.285	66.7341	76.6695	82.4933	11.1646
Q14247	CTTN	178.389	150.878	274.775	154.246	245.999	118.198	93.9074	167.268	42.0524	36.4981	34.995	25.4445	54.5845	49.3467	22.432	0.275416	23.7673	190.844	249.531	46.2948	21.7776	179.476	157.043	40.823	79.3391	44.252	49.6547	46.7723	32.3731
Q13405	MRPL49	48.9693	32.3057	73.7269	42.7541	56.2001	38.166	29.6814	44.0493	12.8258	7.97087	12.2753	8.92785	13.179	11.6375	8.5991	0.73485	6.50112	38.1611	14.1908	7.49378	4.59453	19.8312	36.9885	9.71229	23.9973	8.31084	7.78169	14.8096	2.77871
P20592	MX2	80.1477	50.8118	111.646	70.2481	85.1747	50.9175	31.462	70.5635	12.166	15.122	15.4191	12.4881	29.8757	19.9211	12.1425	2.2837	6.59483	56.8887	39.4969	9.05869	6.76938	27.3848	58.8135	11.0834	31.8779	10.573	11.793	21.9578	15.845
Q2M2I5	KRT24	79.8348	52.2083	108.469	66.0258	88.5443	36.9261	35.8293	68.9487	10.3865	19.6645	12.849	10.639	21.8035	24.4418	9.5144	0.556601	5.95811	63.8489	37.7991	13.1483	8.01093	23.7428	59.9254	11.1721	32.7488	12.7537	14.413	28.4222	14.6251
Q13509	TUBB3	61.7063	52.5848	109.622	50.7857	103.314	57.1938	36.7227	64.7659	21.2627	17.2286	18.8432	7.254	23.637	17.5933	12.2701	0.435536	9.31022	60.2192	36.2073	11.711	8.92981	36.93	68.8189	10.2805	25.7488	11.7539	14.6695	21.3946	7.7003
Q14116	IL18	59.1552	52.7148	147.267	54.3582	138.478	40.8426	42.2804	94.7157	20.6993	27.9891	13.1663	14.2729	24.5717	27.3397	9.64132	0.891671	8.55908	74.8657	70.0151	17.393	9.21432	50.4921	60.9351	14.5682	30.1349	17.4577	21.2361	33.1889	23.7868
P17174	GOT1	241.287	164.479	378.065	216.671	301.172	178.94	136.016	215.826	54.7913	57.3254	56.0643	30.8609	80.8386	79.2454	34.0097	0.743115	34.4053	173.412	82.7936	48.8793	26.4188	102.723	191.913	43.2349	112.089	41.5773	48.1431	72.4892	11.6328
P62195	PSMC5	271.524	193.133	394.619	206.773	310.344	163.579	144.574	195.01	62.333	66.5338	57.9168	39.7265	82.6296	72.3025	40.5699	1.66123	29.6927	244.241	71.3972	55.8539	31.7112	111.46	271.821	51.3071	131.225	53.5471	59.9668	74.3916	7.14637
P06703	S100A6	3531.39	2717.08	5927.99	2999.91	4631.47	2462.94	1860.93	2925.45	692.498	978.959	767.716	512.818	1529.93	1247.93	497.199	2.1638	383.453	5500.6	4464.83	959.548	537.404	3292.44	5127.73	821.578	1785.58	950.602	1064.1	1211.43	690.588
Q96HE7	ERO1A	212.417	133.992	272.326	159.237	200.563	89.6895	89.0465	189.757	25.7116	44.1159	19.5903	22.1737	60.2499	73.9495	18.6188	1.27876	16.1252	197.96	110.142	61.8321	17.0979	79.3286	202.135	26.7181	99.1326	59.4206	58.3077	70.4588	22.9175
Q13232	NME3	82.5883	53.0516	160.076	67.2585	118.191	62.7829	43.9726	92.877	20.8214	22.0681	21.4656	14.2111	37.665	30.8272	11.7031	0.542841	15.4328	80.6716	50.6485	13.5692	9.80061	52.9939	74.787	15.3407	40.5974	12.9387	14.3867	29.5556	12.304
Q99729	HNRNPAB	317.812	267.852	470.65	303.581	393.242	276.586	207.974	244.555	78.9205	85.2226	81.7978	53.3789	91.6694	81.91	58.4931	0.619492	38.0149	235.463	87.4034	65.3002	31.7056	120.035	268.917	73.1493	149.124	65.8303	73.1792	85.8369	4.96606
Q9ULZ3	PYCARD	819.163	610.635	1431.27	726.241	972.936	627.434	552.308	782.028	153.439	202.139	191.616	163.991	342.653	261.187	133.721	0.360417	131.594	749.448	233.101	153.967	96.1903	385.786	827.797	184.373	404.666	165.368	180.839	247.977	47.3546
P31939	ATIC	120.487	84.5951	187.063	100.111	156.163	94.5171	70.413	112.292	31.6276	29.7721	26.3358	20.8614	40.2225	32.5136	18.8651	0.459855	16.0561	91.2823	47.721	18.8048	10.396	55.5871	101.369	20.1035	58.748	17.1664	21.7695	39.6663	11.3313
Q9UKD2	MRTO4	60.5631	55.5486	130.821	57.7365	104.948	60.1943	37.3417	63.6432	21.0714	18.3384	17.417	14.6652	22.8244	18.9091	10.187	0.796053	11.6623	64.4922	31.6686	12.7718	7.64917	36.4231	64.2854	15.5078	33.6516	13.534	17.8303	20.8522	5.75842
Q99627	COPS8	21.8596	14.7366	43.2109	16.2366	33.2225	25.4996	12.9983	22.7178	10.6392	9.38139	6.91649	4.90719	7.36806	9.07351	4.42936	0.486171	2.82672	16.5603	6.72019	3.01836	2.49215	8.85065	14.0994	4.08949	12.9081	3.04428	4.52936	10.1099	1.57349
P18827	SDC1	244.656	196.626	332.276	224.448	302.676	165.069	122.982	175.025	47.6605	49.7029	58.8865	35.4133	61.5742	53.5147	43.7014	0.737414	29.49	221.481	69.3311	45.1051	29.7904	119.051	211.825	55.4282	114.968	51.1331	45.0097	48.4427	21.9412
P83436	COG7	8.09207	26.7174	29.269	17.6962	7.39022	17.2185	12.4919	6.37336	1.3795	1.74252	10.7593	2.91997	11.5199	11.6284	8.71231	0.897341	1.24184	26.1329	8.11012	1.78402	7.93674	9.68425	15.5371	2.67569	10.2604	3.15535	4.64164	2.9103	3.39324
Q13287	NMI	154.992	121.658	245.263	138.91	177.231	125.858	91.2955	122.022	35.3605	35.7846	36.2273	27.9162	57.1313	41.2301	23.1561	0.525314	19.8927	123.227	47.1648	28.5422	16.9467	55.7796	141.862	34.3012	70.8978	27.2469	30.6636	42.1291	9.00783
P08621	SNRNP70	244.569	197.698	398.159	225.394	311.414	199.717	165.862	210.242	63.0073	64.1718	63.8846	48.2667	92.1159	71.4782	41.7005	0.101709	36.675	204.352	58.9177	50.9073	29.7499	117.435	223.66	54.5146	121.139	50.1606	59.0699	73.6762	0.193622
Q16831	UPP1	57.4179	31.1293	73.5573	34.1818	67.2085	19.123	27.6879	56.7183	8.60212	11.6426	4.26139	7.13916	11.9548	17.9301	3.25117	0.355502	3.5779	45.0392	53.247	16.3632	6.12063	31.651	39.8326	11.5125	29.1827	10.9301	13.4381	26.1475	12.6122
Q15286	RAB35	117.934	77.5398	172.353	90.3971	140.791	68.3084	54.8628	99.5036	28.8393	20.6124	22.5531	15.5933	32.6613	33.4273	15.205	1.07479	12.9917	84.2919	53.3257	19.4864	11.1083	53.2731	89.879	20.4642	54.3942	23.7413	21.7177	34.1328	7.67908
O94808	GFPT2	19.926	7.77245	24.9314	13.0768	20.7197	8.72067	9.28119	16.3468	2.88008	3.70095	2.5374	2.88421	4.9134	4.28795	2.52334	2.59366	2.58267	13.5436	8.46533	2.51124	1.80141	8.06454	15.5341	2.31349	8.85512	1.53646	1.69777	5.25041	2.9834
P27816	MAP4	113.06	83.9706	195.706	88.3647	184.169	78.0182	65.5348	115.37	28.9482	27.3755	26.5734	19.5764	39.9756	29.0515	19.7491	1.23903	16.9001	119.237	104.526	19.7458	18.006	80.8061	113.603	23.4651	51.2041	29.3621	28.167	30.7127	11.4194
P54578	USP14	91.8715	74.3819	177.137	80.0872	148.101	73.047	61.0877	87.4205	29.0484	28.4144	22.3236	19.09	33.8337	34.5692	14.5964	0.538577	14.1312	77.2745	45.9392	18.3113	10.0413	53.0483	88.2	18.2217	48.2416	14.8383	22.8871	36.5922	6.15615
O43615	TIMM44	80.5104	86.7019	245.919	89.5711	190.602	100.434	74.909	119.815	32.5318	29.4731	33.9864	21.377	56.5276	47.6055	9.50968	1.14487	22.2234	107.502	67.7724	19.2081	17.8814	69.0209	99.5165	24.3728	51.2032	20.4134	24.0285	38.1481	27.4616
P50402	EMD	194.805	148.005	317.378	151.056	258.726	136.208	110.535	187.345	46.4836	38.5941	39.5309	26.5171	66.5953	47.3435	23.2529	0.883444	26.7161	182.892	240.787	40.672	23.0287	163.455	158.687	43.1757	91.9584	38.5903	44.792	48.7618	42.7871
Q15287	RNPS1	116.552	84.9509	196.01	96.1166	150.566	83.9994	59.7834	104.489	34.1264	27.6139	27.2679	22.5406	41.6385	30.7819	16.4516	1.61037	17.3804	82.761	32.0225	18.8018	11.7214	45.2134	92.3084	21.8582	55.1149	21.914	23.2232	36.888	9.0071
Q86UE4	MTDH	70.3622	43.2613	131.122	41.5405	100.846	54.1289	40.6517	72.7861	20.7222	17.4126	14.4407	9.47574	27.767	26.0468	8.02819	0.657911	15.7736	75.7875	91.7869	13.7292	7.30729	66.601	71.7417	17.0055	39.4081	13.2182	12.5416	26.5899	15.9692
P41091	EIF2S3	307.376	235.54	465.799	255.386	394.95	211.872	195.988	279.813	70.436	58.2122	61.2694	47.6031	95.8308	71.883	45.1752	0.244672	43.6602	235.434	141.189	56.9208	32.9252	169.328	272.707	65.5384	145.377	51.991	61.9195	85.7269	26.0081
P54577	YARS1	126.259	90.9734	158.953	84.6802	120.129	67.3924	59.8932	91.1343	22.9348	21.3528	21.2226	15.3132	34.0003	29.3454	14.6839	1.34827	16.1729	85.0717	40.3787	18.6397	11.101	49.4719	101.761	19.8202	56.5996	21.3977	19.7089	32.5857	7.88781
P19525	EIF2AK2	148.665	117.593	206.415	142.93	175.331	120.258	82.4535	116.493	31.7566	29.0768	33.4678	25.4854	42.2235	33.8388	27.1621	0.247833	14.2486	111.344	46.6118	26.8249	15.6013	59.1598	117.388	31.204	71.1077	27.6118	29.0402	38.1741	11.1041
Q96PP8	GBP5	138.029	129.509	202.522	126.785	104.454	81.6013	79.7773	104.804	21.1183	33.7822	36.7404	34.7459	52.7802	38.4143	31.0928	0.702638	16.2992	102.216	31.6979	20.4716	16.6038	38.6887	129.385	15.22	49.2149	17.9537	21.0767	34.6534	16.2331
P46109	CRKL	76.0533	50.2708	115.178	69.4362	109.688	56.6637	40.8341	72.0597	20.5287	16.6019	17.078	11.106	22.7386	19.52	11.9763	1.38896	6.64914	65.3707	43.5899	11.1269	7.95444	42.5756	55.9647	13.7992	35.7069	11.972	14.6843	26.6274	11.0182
P47914	RPL29	897.432	625.027	1493.9	715.267	1129.69	682.89	529.071	809.187	206.572	179.762	193.609	167.023	311.3	231.314	134.737	1.25653	124.257	742.018	387.119	169.583	104.133	448.575	814.954	211.418	438.25	182.789	198.079	256.016	43.8623
P22102	GART	76.5878	49.5101	111.015	59.1124	83.3067	51.355	39.8322	66.5161	17.2884	12.9826	15.6341	11.0332	27.3028	15.772	11.5276	0.216426	9.80798	51.6436	38.7804	12.3915	7.37702	44.5335	67.0249	14.1751	33.9479	11.9636	12.0353	19.2127	6.18118
O75821	EIF3G	144.262	107.386	276.713	126.293	208.875	113.468	87.1194	162.654	41.8682	37.5755	38.3995	37.1004	60.0301	43.8055	28.7476	0.21046	22.7683	125.629	59.9491	27.5902	16.7363	70.1621	129.102	31.2352	69.8347	30.4302	33.4474	49.0147	7.96917
Q9Y547	HSPB11	0.349036	0.678496	0.960611	0.690578	0.0800086	0.0613653	0.11277	0.00434433	0.417518	0.0340092	0.169274	0.464255	0.21702	0.439818	0.364368	0.372325	0.346826	0.261334	0.812995	0.764097	0.0069551	0.274846	0.857274	0.221009	0.885822	0.0362106	0.731927	0.66599	0.112268
O00429	DNM1L	34.8441	24.8353	57.302	28.0014	48.1375	23.31	17.0374	33.9997	8.40015	7.08844	7.18873	5.83208	11.3071	8.35717	5.47445	1.22461	5.00126	28.6323	17.5212	6.20606	3.02986	15.6791	29.0101	7.89357	17.6308	5.74161	6.74186	10.5818	3.75033
Q5VW32	BROX	26.4221	16.8928	42.4095	20.9623	34.4761	15.9584	11.5774	26.7671	5.5203	4.72281	5.05647	3.95662	8.83124	7.12523	4.06771	0.687626	4.61963	22.1298	17.0009	4.03332	2.48631	16.2249	21.1617	6.38722	12.6819	4.25768	4.23352	6.75245	3.55621
O15162	PLSCR1	119.852	89.5806	163.563	101.064	97.4631	63.3323	55.1987	87.8381	22.4061	25.1205	19.9828	14.783	41.0583	44.2754	13.7034	1.21138	10.839	151.423	54.9628	25.2743	12.9989	70.1897	123.094	18.0727	60.8856	24.0148	21.7479	44.816	8.9391
P11940	PABPC1	417.302	341.946	700.278	331.997	559.667	309.255	234.067	403.681	86.6397	87.4969	97.5558	72.076	155.19	116.535	64.0223	1.12869	69.1471	357.741	160.809	75.6102	48.1459	203.696	369.854	90.0081	206.926	77.3016	86.8521	112.661	50.4825
P60953	CDC42	474.544	321.072	745.486	411.219	568.327	325.889	268.873	438.496	133.238	126.405	111.116	71.6867	164.619	141.936	69.2772	0.772113	58.0849	393.932	152.206	76.3926	46.2092	202.759	393.277	74.0116	223.37	82.7737	88.1688	143.673	46.4311
P09972	ALDOC	853.736	528.112	1060.92	676.511	884.667	395.201	398.097	837.306	124.515	165.34	126.899	94.4413	228.937	245.995	105.13	1.01922	96.2799	615.709	330.753	187.916	60.6403	315.66	667.397	122.253	375.944	186.726	179.245	223.739	101.207
P48668	KRT6C	799.991	846.681	1114.39	686.658	1033.4	282.706	426.768	993.156	100.173	193.073	115.876	126.06	235.327	304.835	109.806	1.15196	35.647	1005.38	768.255	299.676	102.696	431.246	910.587	131.047	356.069	315.965	253.552	291.056	258.686
P22695	UQCRC2	288.631	227.4	510.229	225.027	416.021	220.144	163.881	279.272	80.2264	95.6761	59.9864	44.5054	104.443	108.954	39.643	0.226825	41.1236	285.656	150.203	55.6693	25.3599	160.524	259.268	51.5139	153.693	52.5588	61.03	120.877	29.1604
P17655	CAPN2	36.1492	23.3127	58.0664	28.5159	47.612	21.5174	19.2217	33.811	7.30057	5.97357	8.06737	5.49468	11.8211	8.93477	5.37944	0.252922	4.79972	35.1175	33.349	5.54626	4.57375	26.8621	30.2972	7.63633	17.0138	4.92179	6.99013	9.92695	9.99603
P42126	ECI1	180.115	117.461	239.343	137.167	195.186	112.932	91.2705	140.532	31.9933	40.2307	34.3809	21.9509	53.3089	50.4067	24.376	2.06866	21.4402	146.062	68.2366	28.811	13.5187	72.6073	149.105	26.1275	86.0561	28.6792	27.9172	55.9958	15.5473
Q12904	AIMP1	64.3416	44.9883	104.459	52.4218	90.8148	45.4388	36.6003	62.2914	14.3864	17.1351	13.3499	9.9424	19.8782	19.2622	9.28887	1.04594	10.8774	50.7329	28.3805	10.9267	6.0755	32.284	48.9714	12.0607	33.8765	11.7845	12.3711	20.5829	5.66015
P35237	SERPINB6	244.599	165.96	372.937	174.562	302.217	142.711	146.002	252.838	51.9658	52.6629	43.98	27.2087	85.2341	58.7453	35.9693	1.86441	31.4213	223.978	224.867	46.4087	18.0382	165.357	242.369	36.9609	114.01	44.4162	47.5675	62.6936	83.4414
Q9NRV9	HEBP1	30.0399	28.9869	56.5435	32.0774	52.2213	23.6312	17.064	32.6135	9.47503	5.58726	11.7119	4.70508	13.2527	10.1648	6.49713	0.605945	5.16886	37.8147	20.4194	5.33468	7.22873	25.4183	32.8389	7.44292	15.0038	5.23457	6.71965	7.65031	4.05883
Q8TDZ2	MICAL1	16.5337	13.9962	44.684	9.11716	20.4637	12.1675	12.0176	34.9407	9.72988	7.23404	3.00408	4.1497	9.64244	4.67489	4.65575	0.514891	2.90097	21.0025	28.823	3.30291	2.74005	18.691	14.7997	4.31846	7.60684	5.51648	5.8633	6.49998	19.962
P62910	RPL32	752.397	868.214	2388.04	1100.59	1432.37	1069.78	1194.58	883.965	256.237	247.674	224.272	171.449	485.651	460.194	168.666	0.77579	79.6016	1113.88	879.923	197.989	194.442	1165.57	1494.42	260.74	497.043	213.652	342.062	678.239	405.405
Q14126	DSG2	115.518	78.4849	188.502	92.8343	139.589	82.3638	51.8949	96.7804	26.7662	25.5983	27.077	16.9739	42.6388	35.9464	18.3033	0.847707	14.9345	114.61	80.0993	20.2733	11.1922	62.5967	105.728	25.0249	58.8568	19.65	23.2247	33.6449	7.3291
P46060	RANGAP1	117.749	101.788	211.584	112.579	163.275	100.978	70.429	132.535	31.5185	26.9085	32.7436	29.0228	45.319	35.5195	20.8044	1.16105	16.3384	91.5711	46.2097	23.9905	14.6684	51.3434	103.15	26.8019	55.2867	24.8353	27.6948	36.5572	7.34139
A8K2U0	A2ML1	153.518	86.7531	195.854	132.948	133.695	41.3422	55.0719	183.907	19.2835	26.5754	14.0237	17.5302	41.7884	53.8297	14.8659	2.03375	11.5366	143.1	178.303	64.048	16.6195	114.397	91.9876	40.4771	46.8204	56.6243	52.4651	51.4559	25.2443
P21912	SDHB	105.059	72.9449	145.78	83.5225	114.609	80.1234	59.1446	77.2824	23.8045	22.4871	22.3135	11.9516	32.3364	27.9318	14.5556	0.322904	12.4069	91.8863	61.3234	16.8656	8.99411	60.5866	80.968	20.8906	48.0809	18.7518	16.2439	31.0359	4.36264
Q15019	SEPTIN2	107.061	120.386	218.459	104.847	193.555	97.7208	70.016	121.124	37.8269	32.318	31.1486	21.4032	39.2986	36.53	22.9966	1.40039	9.6623	169.9	210.394	26.2393	19.2727	141.103	116.812	26.8924	60.569	34.528	34.5976	41.8986	66.3369
P61201	COPS2	21.4465	30.7243	51.9695	18.0507	48.5797	22.1667	19.8043	30.8966	7.29046	9.64788	7.59435	6.97776	11.4022	11.1711	2.91764	0.739153	5.04002	20.5322	11.9218	5.99845	3.49941	13.3336	22.6375	6.18388	11.4174	5.35478	7.25055	12.2165	1.77732
Q04637	EIF4G1	120.506	101.238	200.329	110.144	156.248	95.3512	69.9818	115.062	25.3054	26.1162	29.1508	22.308	43.0385	33.678	20.3406	0.710712	17.2311	104.802	48.0899	24.2144	14.4648	54.158	109.643	28.6422	58.3699	24.7269	28.0014	31.6514	8.87472
Q03518	TAP1	185.843	160.835	316.824	174.075	219.635	148.947	122.206	162.134	45.1987	53.7629	51.0387	40.8904	73.088	63.2069	36.6057	1.45613	21.6094	154.144	46.4114	36.6785	26.9707	66.992	164.551	32.7279	86.3721	34.5396	43.4336	64.8407	2.96618
P09543	CNP	81.7278	59.6292	116.734	75.6528	99.4193	50.9894	46.2211	71.498	13.5991	19.4933	18.8799	11.6579	26.4305	22.6994	12.5523	0.855846	10.6915	68.754	36.5801	13.8205	9.74094	47.8287	67.6749	14.6448	35.4329	13.7688	15.3601	22.6118	4.66253
P08559	PDHA1	121.059	112.623	168.886	96.3773	130.785	52.5826	60.4406	96.5537	22.6775	26.0542	27.6663	18.1381	41.7812	27.7742	14.9906	0.602325	13.0992	127.091	62.6525	22.0314	17.8706	54.0951	113.834	29.8182	51.3224	19.1464	19.6535	31.3333	14.1339
P49411	TUFM	513.529	384.037	862.478	413.387	673.441	402.867	316.669	485.67	114.581	144.518	125.334	83.3398	204.236	175.977	79.6803	0.500084	78.8871	512.675	168.557	99.1293	55.3494	259.901	496.691	102.169	263.658	93.8819	105.202	187.992	41.9549
O60271	SPAG9	7.32724	6.99877	10.2097	2.45412	9.83721	3.75407	4.51497	8.01279	1.79055	2.05567	0.284983	1.11651	2.44915	1.69834	1.14257	0.578653	1.73659	3.14168	3.61737	1.2454	1.03408	3.41363	3.88018	0.543044	2.67236	1.20776	1.80654	2.53177	1.11191
Q9Y5L4	TIMM13	85.2854	62.6962	134.11	63.9931	109.785	61.736	52.3058	75.115	19.7272	14.8746	20.4724	13.2711	27.7287	21.6363	11.1715	0.772541	15.21	68.2229	36.8857	16.4758	9.19603	45.5673	78.0689	19.4871	41.4826	16.1876	16.9798	22.2693	5.28748
P31153	MAT2A	318.557	247.664	522.258	272.605	430.785	241.602	193.282	293.202	83.2064	79.7664	76.6642	56.1689	109.703	92.1788	49.3126	1.51055	43.5979	254.989	100.026	60.4659	34.9481	140.874	284.905	71.2078	149.538	60.221	73.3166	95.372	25.4039
P78310	CXADR	22.9856	16.1152	36.1483	15.7006	24.6402	14.7881	11.6988	19.7547	7.39967	2.61355	5.43873	1.95423	8.59981	5.10544	3.94328	1.77565	3.8598	16.2614	5.22129	3.61912	1.97937	10.6711	18.4103	5.74837	11.0456	4.59873	3.18788	5.48505	1.38275
P05161	ISG15	439.769	314.889	605.137	429.223	513.753	322.018	221.894	354.698	85.231	92.5747	93.7827	83.1574	123.878	109.936	71.0032	2.65073	34.4072	381.718	278.401	66.7839	50.1295	222.284	331.217	80.901	190.713	75.9428	83.0549	136.335	31.2789
P05141	SLC25A5	1186.81	876.521	1966.28	978.356	1577.68	876.434	709.334	1092.79	270.868	323.585	272.552	167.003	420.371	367.897	174.922	0.0496153	167.139	1114.5	498.634	235.572	122.205	615.487	1118.64	238.5	588.753	228.111	249.004	392.741	129.045
Q14134	TRIM29	154.189	194.194	197.593	109.94	182.08	65.3749	77.518	136.445	25.3536	25.8067	22.935	17.0027	35.5087	37.2874	14.966	0.62475	13.4982	128.192	167.045	47.2792	24.4136	118.506	111.256	26.9632	64.8488	42.6141	50.2525	40.0828	44.3248
Q15369	ELOC	227.203	182.763	412.88	174.632	339.762	157.384	140.954	248.664	68.9877	61.1755	48.0049	37.5646	83.6705	69.3039	32.4846	0.794543	38.667	199.651	129.669	48.5265	21.3853	130.836	220.896	50.9511	119.563	48.8423	55.7109	82.9859	22.3523
O00264	PGRMC1	311.74	191.171	486.141	230.03	408.897	202.264	158.337	288.98	69.3689	71.1987	55.0288	31.7869	98.3802	84.1112	41.2115	1.46375	41.0787	257.766	291.008	53.1348	28.8146	208.078	253.954	64.3065	156.388	50.9846	59.441	95.8953	80.1424
Q9NS69	TOMM22	308.936	249.951	563.306	294.86	440.701	284.361	199.627	285.485	92.0379	92.4135	83.3675	67.6481	106.878	100.09	62.9554	0.798137	44.9437	259.31	91.1093	60.0378	42.2786	132.341	245.672	65.9591	170.439	69.3958	69.2493	112.055	13.4414
Q9NQ29	LUC7L	24.0448	11.9251	37.1395	14.494	31.0883	12.9598	11.7918	24.8485	5.59972	4.10049	4.73221	3.17247	8.20057	4.27168	4.00439	1.05631	4.75554	14.3403	11.6646	3.27118	1.85259	11.0361	16.8308	4.68102	11.432	3.78057	2.89289	6.49017	5.79851
Q9Y2X3	NOP58	194.992	153.928	327.07	181.246	258.09	167.697	115.708	166.799	55.6826	55.9441	49.0873	38.4541	65.5256	56.9266	33.3675	0.443303	25.4478	156.854	66.0516	36.8039	19.7705	91.33	164.736	40.3269	97.8307	39.2091	45.6784	63.9516	8.67971
P17301	ITGA2	29.6342	16.0168	35.9923	21.6216	26.0079	14.7405	13.1671	21.1289	5.842	3.3379	4.74645	2.8365	8.39482	5.68974	4.3882	1.92551	3.38767	16.4981	9.22903	4.81701	2.49789	9.68797	20.8296	4.56679	12.8588	3.65796	3.53275	6.32137	2.44426
Q15181	PPA1	583.006	457.409	914.426	487.478	746.23	454.532	346.07	525.333	140.177	167.888	137.48	115.186	191.002	156.775	112.547	0.699106	60.5828	476.844	189.819	115.406	65.3508	256.057	517.225	123.013	269.975	114.243	134.323	177.896	22.5405
P34932	HSPA4	437.28	354.014	781.403	405.191	624.944	395.713	271.809	412.301	116.05	118.271	113.048	80.7913	157.435	130.685	75.3009	0.029764	64.7406	384.911	178.833	88.0034	49.7653	197.231	416.768	103.353	225.893	80.9498	97.9506	130.047	62.6249
P22234	PAICS	166.085	126.366	297.495	130.458	230.119	126.258	96.2167	170.41	48.3688	42.5514	39.0001	31.5908	62.1325	42.5184	27.7554	1.51654	27.9107	142.419	85.091	33.887	18.3331	94.9716	147.411	37.6766	77.0149	32.9934	39.3866	51.9058	7.76757
Q9H8Y8	GORASP2	53.228	38.6175	86.3915	37.772	69.564	32.1231	28.9533	47.3641	12.4457	11.8517	9.46977	7.81519	14.878	14.6178	7.57695	0.391553	8.44012	42.3731	34.2268	9.4277	3.79353	26.2805	41.8808	10.0361	25.005	9.44338	9.6905	17.7007	9.38159
Q9NTK5	OLA1	159.281	119.426	277.897	123.374	212.177	115.373	96.3301	147.449	38.0614	41.9816	38.3432	28.212	58.8446	48.658	26.736	0.90662	25.9228	141.054	68.9215	30.5937	19.5469	84.7007	153.195	32.6402	80.6264	30.6684	33.6409	48.9623	8.95627
P54136	RARS1	237.82	197.845	378.753	223.006	321.904	192.565	146.555	204.448	60.2295	64.5149	60.8181	41.7696	76.7434	68.9877	39.5204	1.98591	30.7841	202.077	74.6837	52.2498	28.2977	117.502	207.237	54.2668	108.098	49.1999	59.3071	68.8734	7.74876
Q16611	BAK1	16.6245	10.4693	27.3151	13.7531	19.2342	9.96619	7.1445	14.8473	3.11286	3.05956	3.92476	3.14658	5.98635	4.21559	2.7708	0.657907	1.92038	13.4057	5.96545	2.97889	1.94386	6.91141	14.0538	3.50404	6.65852	2.41185	3.2086	4.21819	2.19542
Q9NR28	DIABLO	42.7977	30.0111	67.9468	34.7903	52.0618	31.1202	28.3616	37.1507	9.34268	9.47331	8.7606	5.49118	13.4445	9.69172	6.73312	0.615558	6.66224	31.99	16.0449	9.0547	4.47002	17.1556	38.461	8.85628	20.5042	9.07303	8.36447	12.16	3.94198
P33240	CSTF2	38.9299	26.9629	55.1478	33.1027	45.4389	33.0412	21.3796	26.1804	9.86331	8.70741	9.06719	6.4725	12.2831	10.4877	6.02198	0.210299	5.42986	29.9819	11.3821	7.48675	3.17087	15.0155	30.9511	8.51109	17.3452	5.98917	8.53612	9.76804	1.622
Q9UBW8	COPS7A	13.014	9.22872	24.0237	12.0627	20.7467	11.2876	7.28971	13.2959	3.71196	3.56464	3.65376	2.4762	4.244	4.76208	2.13427	0.364891	3.17705	11.3892	4.43406	2.06544	2.17898	8.3993	10.7303	2.05468	7.51408	2.20227	2.76175	4.44999	1.3487
O00567	NOP56	247.076	172.074	400.672	220.939	321.943	182.56	149.207	188.936	67.4541	62.6412	56.5582	45.1101	83.0029	74.6354	37.075	2.79936	29.9383	214.469	85.8068	47.6572	26.157	121.365	228.564	47.0597	124.071	50.7526	52.3931	78.5666	13.3226
Q93045	STMN2	72.304	60.4945	137.559	54.1975	126.96	73.1438	57.6682	73.2074	25.489	26.9757	18.5321	13.9758	26.7163	21.5912	15.5745	1.01413	12.3065	73.2797	26.5891	18.2803	9.76395	41.6397	76.3805	19.9142	39.428	14.946	21.1689	27.5335	3.13488
P31949	S100A11	6058.73	4467.7	9024.48	4953.82	7186.25	3409.36	3053.96	5784.94	1105.63	1496.13	1184.73	803.526	2038.32	2071.34	849.245	0.751442	593.999	5572.97	2870.75	1471.63	696.41	2773.82	5835.55	962.916	2739.08	1313.58	1490.05	1840.48	558.126
P08708	RPS17	896.601	712.347	1336.99	628.311	1032.07	616.18	500.707	705.294	233.573	191.802	188.903	122.673	268.151	209.609	120.389	0.57534	101.277	749.914	412.732	153.107	91.3906	471.275	734.773	177.49	403.008	149.124	165.833	261.063	91.6804
P50453	SERPINB9	374.061	303.298	630.187	324.381	514.551	274.81	222.935	366.336	87.6747	98.9515	79.6846	80.7042	154.369	109.51	58.1791	1.23271	48.627	379.675	174.141	75.2706	37.1757	214.101	408.436	76.5406	191.239	80.2225	88.7304	130.233	37.2173
Q96I27	ZNF625	2.79195	4.23266	5.9152	0.186406	0.154782	4.9943	2.41867	3.01435	0.203712	1.42671	0.786716	0.0949453	1.70809	3.3342	0.582874	1.32144	3.34615	5.03638	1.09906	5.39426	2.01001	4.9764	2.31183	1.02374	2.18373	5.82948	3.3957	4.88415	0.0122901
Q9H9J2	MRPL44	5.40941	6.89163	13.3202	4.40327	13.0455	6.66443	4.57904	6.61372	3.73475	1.2218	2.05796	1.05944	1.54672	2.52069	0.767366	0.88478	1.56274	6.2985	3.21815	1.698	0.493158	4.27468	6.64889	1.61114	4.68231	1.86257	1.70205	2.70383	0.688087
O75828	CBR3	427.199	287.738	561.406	302.485	393.992	208.114	198.578	351.579	68.2599	78.2793	76.0372	52.6183	136.119	90.972	55.6256	2.0283	49.4947	302.76	267.666	62.9711	39.6698	210.167	315.979	63.5639	168.606	62.5313	57.1496	99.6313	70.4792
P62760	VSNL1	119.701	84.8417	183.805	102.067	134.363	57.6717	52.1107	130.262	20.9298	24.8796	20.9082	13.5948	42.4673	36.4439	16.0746	0.386808	14.2551	86.8804	70.2236	27.7178	14.3473	56.2584	78.1141	18.1	50.1553	24.6921	22.8139	33.4727	22.2788
P07858	CTSB	206.04	171.016	318.551	187.162	237.933	138.281	114.754	233.968	53.3854	33.5108	45.5563	29.8655	83.2124	62.5495	31.1928	1.40006	23.7322	167.052	80.8534	62.6804	21.9637	108.398	195.095	40.9004	80.4879	58.0298	66.3037	48.0635	7.4084
O43143	DHX15	181.329	148.675	270.54	163.642	207.605	142.266	109.276	140.098	39.3577	40.3202	42.4481	28.3594	62.2174	43.6831	28.7681	1.16552	20.9866	142.963	61.6948	36.6261	19.3073	87.221	156.934	37.9498	79.3389	35.0423	42.1916	47.6544	9.06532
Q9UKL3	CASP8AP2	18.9456	15.733	28.5748	16.5675	24.8186	9.73094	9.27205	19.2973	3.3518	3.60109	4.87439	3.00104	6.21992	5.62568	3.45716	0.677328	1.61719	16.9704	6.96653	3.92992	2.8264	8.09815	19.4036	3.44966	9.18377	4.65413	4.38298	4.71695	2.3311
O60832	DKC1	54.4646	38.91	91.0783	44.6514	70.062	41.2259	29.5258	48.2136	16.8741	13.238	13.9433	9.75039	19.4462	16.5319	8.01793	0.808349	7.32635	39.9478	17.3647	9.42876	5.77079	19.9169	43.3143	9.7412	25.4361	9.47888	10.757	17.4134	5.03258
Q14566	MCM6	81.1417	55.7713	133.632	66.8019	112.572	65.2858	57.4344	68.5432	22.8687	23.361	20.8486	11.4471	25.9915	23.9108	12.9752	0.834613	14.2176	61.4963	24.8107	16.7599	7.68488	41.8543	67.6391	16.8235	42.8106	13.934	18.1175	26.542	4.09933
O95817	BAG3	56.5445	33.7526	77.916	35.5411	59.4971	27.2384	23.3398	49.4904	10.2593	8.64662	9.63691	5.4168	16.8483	10.1277	7.14591	5.05823	7.83582	49.8755	54.2338	8.66196	6.64572	44.55	46.5978	12.606	24.7594	9.06017	8.6896	12.7983	10.1421
Q9NRD1	FBXO6	32.3434	22.9482	54.5786	24.0465	38.6997	24.8082	15.3123	31.1144	6.79462	7.68135	6.55678	5.6031	13.609	10.2271	4.46713	1.44439	5.42935	26.5221	12.3647	5.45112	3.71334	12.2848	30.6806	6.37056	16.6325	5.0896	5.12993	9.85742	3.57249
Q07065	CKAP4	498.973	348.526	671.797	365.178	578.508	255.847	225.361	453.987	78.6294	69.9537	79.2836	55.0503	148.724	109.969	61.0081	0.169654	55.9034	434.225	425.436	99.328	60.0239	379.859	426.746	112.126	191.207	108.464	116.381	106.486	148.825
Q00325	SLC25A3	559.87	410.83	936.918	477.71	769.663	411.441	322.309	538.449	128.373	152.102	122.368	84.7591	196.792	191.52	86.837	0.958334	73.9102	577.022	276.288	122.198	56.8567	334.273	560.167	121.179	289.909	128.227	124.622	199.683	49.8508
Q96RP9	GFM1	28.2899	18.6377	47.0941	21.3997	35.8586	23.3417	15.5013	28.2938	7.16367	7.06496	7.06826	3.91298	10.3012	7.4655	6.6899	0.787245	4.87372	20.2303	9.57601	4.47229	2.41605	12.4695	20.8342	5.81151	14.6032	5.12653	4.33536	7.76734	2.42666
P15085	CPA1	221.3	182.471	257.401	235.03	203.448	141.771	88.6331	166.722	41.4595	35.6149	58.1	29.7006	68.5285	69.0443	35.5421	1.20383	12.2198	175.341	52.2512	52.8984	30.2666	78.7961	179.486	46.0915	72.7843	57.6578	56.4913	44.8478	7.15114
Q9UBQ0	VPS29	96.2858	92.95	147.239	78.4168	128.82	62.7505	54.0772	81.9122	23.6053	31.9139	17.2274	11.8549	34.6312	29.3103	11.9852	1.19311	12.8977	118.163	83.6929	20.9181	9.38933	78.1984	110.484	20.7173	50.0631	19.5635	24.835	35.9559	10.5072
P18583	SON	17.8605	16.1894	26.0808	13.5153	21.587	14.0396	10.5214	14.3823	5.11598	4.21181	4.06138	3.12425	6.71903	5.38353	3.0231	1.02706	2.19841	22.9612	3.74569	3.87626	2.38007	11.6024	25.2178	3.30796	11.7184	3.81533	4.74411	5.29756	1.4961
P52565	ARHGDIA	856.214	695.277	1519.23	650.258	1298.33	603.675	533.444	1023.43	218.461	282.52	161.57	163.544	300.733	264.318	153.524	1.94448	123.589	795.29	583.356	189.9	82.7836	511.555	813.838	151.486	438.244	165.741	212.907	324.697	134.399
Q13263	TRIM28	419.285	393.552	761.704	441.038	666.779	429.947	319.812	342.971	151.545	153.056	130.918	87.5172	141.69	163.851	81.8589	0.292815	63.7871	374.809	111.495	100.455	56.0944	198.536	402.339	109.851	244.11	94.1387	119.036	165.458	6.75274
Q9Y3C6	PPIL1	24.2609	12.6222	34.5828	25.6504	25.0646	10.2447	15.8647	15.6842	3.30634	3.96167	4.74586	3.34701	5.32801	7.2587	4.24681	0.409237	3.18911	21.5519	11.6477	4.16775	3.49085	16.5722	19.6763	4.71401	9.71773	4.2783	4.06187	7.88075	2.79839
Q15102	PAFAH1B3	66.2111	45.6901	112.081	57.9071	89.3378	46.6664	37.3105	41.9467	21.8208	21.009	16.0382	7.65511	20.9536	20.7698	6.73734	0.497017	7.34844	62.2816	32.1881	16.7277	9.00374	31.9163	65.5	17.4454	31.1853	9.75844	18.0376	21.8912	4.12053
O60220	TIMM8A	89.2986	62.8373	125.246	69.9025	113.59	57.2327	50.056	76.1695	16.6812	18.304	17.6165	12.5217	24.3288	21.1619	11.9894	0.775301	13.8843	67.086	45.3036	16.808	7.75709	45.9312	70.7836	18.7638	41.652	17.238	17.2429	23.4426	7.92073
Q14210	LY6D	668.859	408.802	877.562	520.046	619.977	365.573	329.777	422.105	99.2216	138.025	144.336	76.6012	224.034	164.209	79.8952	0.327324	75.9374	645.282	329.037	116.598	91.7019	434.698	638.064	139.907	273.919	124.75	134.533	150.159	38.3639
P11177	PDHB	72.1777	50.1409	117.607	63.4784	81.106	55.0534	38.7576	62.4609	17.3189	19.9666	17.9218	11.1918	27.294	22.8384	10.1819	0.488363	10.2307	62.0492	45.6685	10.9543	7.43607	43.7362	54.2833	13.9571	30.5282	12.457	11.6061	23.9311	3.0379
P05091	ALDH2	1231.88	918.752	1937.06	1074.83	1415.36	912.348	765.481	1013.46	289.775	321.809	293.523	196.814	479.557	393.819	198.786	1.78176	182.312	1015.92	378.63	205.832	122.663	558.571	1036.68	232.566	614.879	221.483	205.993	387.818	77.5767
P62266	RPS23	848.191	667.964	1351.23	660.416	1087.28	620.385	488.376	746.573	209.277	184.968	186.528	144.893	277.02	211.724	119.19	0.733238	120.131	739.411	379.619	152.513	87.5527	466.416	757.502	196.66	423.592	172.469	186.427	246.709	77.9106
Q9H9B4	SFXN1	168.473	136.441	305.706	155.608	260.849	142.942	110.009	176.036	47.0169	47.9919	38.804	29.6325	67.7819	59.9473	27.3675	0.920505	24.876	196.895	101.263	39.7064	18.8798	114.31	196.721	40.9416	97.984	36.4968	41.0034	64.2832	18.5524
O96000	NDUFB10	104.044	63.3758	163.142	89.8872	146.115	75.6689	70.4181	97.834	23.7985	24.9283	23.6075	18.7554	33.3087	31.0833	16.2857	1.44212	17.7883	86.5017	36.8254	19.9983	11.9547	53.613	100.396	21.8329	51.443	18.0258	22.8498	37.8401	6.80436
P50991	CCT4	313.607	235.423	557.723	245.465	435.996	259.572	198.384	308.318	80.9071	87.5887	73.8429	62.0059	120.996	94.7961	52.5707	0.791994	46.4996	291.505	162.458	55.9628	33.3556	179.127	290.196	65.0991	161.336	58.2538	68.8509	112.931	28.8818
Q9UNZ2	NSFL1C	231.594	184.921	315.419	188.135	293.26	155.581	127.935	193.949	52.1692	44.8318	53.7333	31.2266	67.1091	48.7864	32.756	0.533103	27.8251	185.052	114.108	41.3548	23.5071	118.082	203.792	51.4245	102.581	42.8216	46.0046	50.6273	32.5559
P14174	MIF	1647.14	1429.53	2893.11	1440.38	2370.34	1321.69	1185.73	1547.23	481.432	431.161	444.448	248.69	580.842	394.775	289.926	1.35565	204.597	1645.38	1100.59	334.549	188.719	996.467	1627.63	413.188	845.582	345.848	362.57	460.147	242.382
P42166	TMPO	267.383	200.892	407.741	205.262	351.42	183.903	188.869	205.362	67.3311	68.2889	56.3865	38.4482	69.9078	70.3682	41.7193	0.923619	33.8389	209.236	81.4157	52.6744	25.9972	132.526	233.688	57.2516	139.113	51.8593	55.4324	87.2175	27.6493
P42704	LRPPRC	113.437	91.9891	193.92	106.061	153.342	108.624	71.9047	100.233	29.1657	30.773	29.3507	20.7933	40.8377	34.9151	20.609	0.604542	18.6794	94.4885	36.307	23.0627	12.442	49.0719	105.365	29.1238	59.9395	23.9378	25.5836	37.1426	6.75288
P18510	IL1RN	322.524	222.22	395.523	270.99	342.477	105.127	142.277	265.6	27.455	58.8763	44.2276	34.979	70.7274	115.863	35.6623	0.928114	13.4007	367.043	318.947	100.476	57.8671	206.351	275.906	50.0179	145.571	96.999	110.966	116.253	69.6989
P16402	H1-3	196.442	218.576	502.029	182.453	408.079	243.987	206.774	181.683	83.9169	101.806	59.069	45.3372	81.8272	97.1948	28.2408	0.527973	44.6646	257.265	119.707	63.0082	31.2979	169.015	231.135	69.2639	149.096	57.4712	73.6532	115.115	8.52121
P12830	CDH1	135.998	83.6112	157.149	107.844	122.189	69.5343	69.321	87.13	20.6123	27.4311	25.8605	15.1963	31.3257	32.6592	19.1682	1.65681	11.6375	85.0864	41.3651	21.8561	12.7496	46.0999	91.4315	22.5423	54.2871	19.1147	18.6732	33.2286	11.1755
P19012	KRT15	726.492	570.595	1200.19	691.872	1043.85	556.52	491.007	533.954	234.504	265.396	217.59	81.9048	233.003	306.66	148.358	0.4837	88.8837	602.485	218.626	179.581	114.771	307.563	634.172	149.521	401.845	126.81	150.311	264.837	11.9424
Q9Y5K6	CD2AP	15.4403	5.68172	21.4725	9.96458	15.4335	8.62005	7.05555	13.8899	3.11849	4.94547	2.70187	2.81568	4.18397	4.58132	2.98011	0.387561	2.33063	8.31499	6.32293	1.08144	1.74159	5.08615	8.10892	1.85736	7.13388	1.27909	1.36116	5.92957	1.7202
P33241	LSP1	96.6415	89.3836	201.667	86.8734	163.632	60.9403	62.5723	116.575	33.8711	35.6642	21.7944	16.6825	40.4522	33.5544	15.5755	1.31489	11.194	111.46	68.8334	24.4637	12.8645	68.6255	115.779	19.6176	54.7303	26.0676	30.5945	46.5913	16.606
O15258	RER1	38.5731	48.5222	105.896	35.3438	92.6697	33.0889	32.7954	74.101	14.3731	7.67693	14.7448	9.95293	17.0289	22.4679	8.89196	2.37879	8.14146	62.6548	70.0622	12.1519	12.8751	57.6651	47.5715	12.96	28.8019	12.5969	15.8343	19.8695	17.4172
Q9Y5J9	TIMM8B	9.8344	7.03344	21.5341	12.8931	20.4853	11.8552	8.90218	16.3347	2.83324	2.03343	2.42966	2.46196	3.78175	4.71895	2.35244	0.823247	3.87418	10.3472	5.15287	2.2461	1.37348	9.70507	11.521	3.11429	8.4111	1.87432	3.39185	4.89457	1.47756
P04632	CAPNS1	270.531	205.665	394.879	230.943	352.775	171.951	152.633	283.886	48.0498	57.7308	52.9146	38.7982	75.3751	89.9249	41.9025	1.52824	31.2697	237.949	206.193	65.0085	29.1681	161.325	245.382	43.8794	128.049	55.8117	66.8592	83.3753	31.6474
P61604	HSPE1	2330.08	2097.63	3807.85	2385.68	3068.59	2245.61	1599.92	1771.24	589.138	612.196	656.062	422.691	842.997	768.71	387.383	0.848729	303.817	2355.61	746.346	570.87	328.007	1135.82	2312.56	632.642	1199.25	529.492	638.725	729.354	58.4879
P23921	RRM1	8.14201	5.9971	19.0601	5.73849	16.3863	8.04601	5.82838	10.689	3.70102	2.38428	2.42248	1.62388	4.46724	3.58773	1.36295	0.675802	2.1122	6.90563	2.45885	2.36403	0.812963	4.73571	8.57149	2.84949	4.81494	2.27085	2.17247	2.94347	1.20179
Q01082	SPTBN1	21.4553	21.187	62.918	27.5697	31.5716	26.4954	12.1765	19.5617	6.72919	7.67986	7.63134	15.2098	8.33405	7.33282	3.66323	0.371882	3.68575	36.2765	30.9083	5.05403	2.35149	21.0388	25.9577	3.59141	10.6451	11.0211	8.23161	9.32293	14.2928
P49721	PSMB2	456.854	312.779	983.027	524.691	479.223	452.263	282.046	336.975	95.6109	104.95	136.455	223.936	136.566	98.4514	74.1194	0.750251	40.5181	578.253	317.218	86.221	47.6059	281.779	404.779	75.0677	175.908	186.873	161.618	111.714	204.131
Q15046	KARS1	165.931	127.125	268.889	139.52	215.736	128.489	106.975	149.642	36.2901	39.6096	37.6907	28.2553	58.8477	44.3215	28.3703	0.511975	24.0971	157.963	92.3201	28.9786	15.4339	102.922	151.117	30.7311	83.8494	28.6281	35.3801	52.3264	22.3454
Q12931	TRAP1	160.955	114.09	242.721	132.383	161.19	109.886	74.1414	150.844	34.0245	32.3145	35.7603	28.5226	62.3148	36.2665	28.3819	1.21046	23.3247	131.955	61.4546	28.6265	13.9343	67.3635	140.603	34.2003	65.7953	32.3796	31.294	39.6613	11.427
Q9UKX7	NUP50	70.7077	47.5924	97.4204	62.0025	88.6259	43.8518	34.4151	67.5684	15.8615	12.331	14.1232	9.19282	20.0857	21.3966	8.88438	0.667311	8.41755	44.0777	29.5271	17.3924	5.13302	25.6399	53.352	12.2762	29.8164	15.0437	14.6533	18.86	11.37
P30085	CMPK1	348.564	276.606	486.393	237.634	338.635	166.315	182.479	295.708	62.8405	72.2976	60.8089	56.3645	113.188	91.2327	51.1603	1.40882	33.076	328.923	225.201	64.9279	30.7953	171.808	336.775	44.4012	166.302	49.4289	67.644	89.7782	81.7207
P22392	NME2	492.03	356.492	747.708	364.086	541.155	332.61	240.162	429.748	105.44	112.505	104.926	63.9962	187.064	131.105	73.9231	0.614916	62.2482	466.918	203.85	98.2196	55.4893	223.877	456.014	112.723	211.893	102.146	116.012	113.646	40.4319
P35250	RFC2	9.20188	7.50146	20.8142	6.63157	15.8387	8.66208	6.98341	11.1675	4.26575	1.73286	3.70659	2.89079	5.40683	3.06907	1.18476	1.79092	2.84638	7.65935	2.78409	1.91931	1.63339	5.46612	8.2708	1.77233	6.0577	1.10063	2.1488	3.35271	0.363872
P61758	VBP1	57.7554	47.9945	90.208	58.3526	82.3744	48.1886	56.2465	37.1521	12.8628	16.6647	13.3443	10.3397	15.2499	12.237	8.51962	0.98562	8.16843	50.0271	29.6307	14.5136	5.01029	38.59	53.2053	10.5851	30.4239	10.6386	16.6098	14.8591	9.40593
Q7Z2K6	ERMP1	148.143	75.5401	201.544	116.457	161.921	81.7371	74.8958	110.298	35.1043	34.5619	36.9052	14.9869	39.1788	51.9171	18.1676	0.826629	13.949	139.129	49.7547	31.1672	19.3963	71.1145	136.122	26.5764	60.9518	21.8471	29.1285	50.2933	10.6006
P61225	RAP2B	38.7978	29.2887	63.5875	31.259	48.4087	25.1555	23.8024	32.2625	12.3105	9.52465	8.48487	3.59003	13.4054	12.0757	6.36495	0.612335	3.67322	36.238	14.7226	7.7986	4.36046	19.4025	30.7902	4.81623	18.0228	5.8829	8.19709	14.2916	7.42539
P30046	DDT	350.034	337.464	581.167	312.897	552.626	289.135	256.003	323.715	99.4445	112.416	83.6099	44.3813	100.239	109.759	61.7327	1.01983	43.3468	413.53	249.005	90.6599	46.8363	237.787	392.668	86.6217	197.05	78.6849	97.9251	124.886	34.5711
P13747	HLA-E	87.4879	74.4043	150.117	74.3303	117.152	66.7022	56.4643	79.4539	24.3278	26.9378	19.636	14.7966	32.5069	27.4642	13.7474	1.81385	12.8062	84.4409	46.5495	17.6772	10.785	51.6341	91.2619	16.4692	44.2836	13.9918	20.2439	32.0553	4.65
Q9Y5S9	RBM8A	472.778	392.806	766.585	455.085	584.292	387.442	307.298	367.972	125.265	124.01	125.626	83.4365	166.289	136.826	80.9933	0.679675	61.2814	389.516	148.63	90.2655	56.0697	217.015	410.145	100.81	229.759	100.124	107.885	149.352	23.9005
Q08J23	NSUN2	78.6434	48.6651	115.91	55.2355	92.103	44.4332	39.4186	75.675	18.352	13.2673	14.9704	10.1073	26.2052	16.5568	9.70252	0.347733	11.3569	57.1002	56.8502	13.4825	6.54819	39.9517	65.4304	14.2379	32.5156	11.9598	13.5313	18.4281	30.9307
P46926	GNPDA1	50.4454	38.1773	113.127	43.7594	103.996	43.5391	35.7153	71.1248	21.1036	17.2809	13.5397	13.5611	20.605	20.1675	10.7898	0.16375	7.18588	63.307	105.562	15.4404	7.59556	49.65	66.3723	14.6214	38.0297	13.9882	15.2425	23.3241	45.5856
Q9P258	RCC2	103.519	73.9255	168.753	85.0235	142.078	79.5428	63.9237	92.5332	29.5771	28.105	23.2848	16.0399	35.4247	30.6169	14.7476	1.07665	16.2567	81.0685	35.4093	18.0968	10.8791	51.6238	90.8055	23.4429	54.0577	19.8758	22.7606	33.9804	8.28054
Q8NE71	ABCF1	65.1147	50.1859	102.665	53.6217	88.3131	54.3486	38.8877	58.2697	17.3531	16.2469	13.9029	11.123	19.0828	18.3058	9.23278	1.09558	8.81585	47.1513	28.5268	12.3036	5.61276	28.2534	49.7797	13.6937	30.9839	11.6514	14.6681	19.6935	7.28057
Q99584	S100A13	83.8074	53.4737	147.533	56.2315	124.686	49.6742	47.7724	79.3339	20.4484	17.575	17.7498	14.0316	34.0751	28.5146	11.4047	0.480902	12.0036	90.1622	66.7681	17.2234	11.1103	52.0989	96.2718	13.6185	41.2217	13.7631	16.7808	26.0089	56.2315
Q969G3	SMARCE1	49.3244	30.9193	80.3618	42.3967	62.4952	41.613	28.4461	47.4448	10.9709	13.774	10.618	9.31751	17.3894	15.607	8.26775	0.945107	7.2299	31.0458	13.3312	10.4393	4.73619	21.2884	36.4878	9.70228	23.2424	10.3337	11.9821	15.9699	2.41919
P18754	RCC1	127.231	94.9398	184.171	108.663	151.716	89.5497	62.4535	89.0005	29.5734	25.9588	32.2327	25.378	39.6383	33.3808	19.4334	0.30682	15.382	98.3243	41.6324	23.2833	12.8136	49.9454	102.568	28.4337	54.9295	24.0006	27.8724	33.736	6.90874
P25325	MPST	50.1057	36.2588	90.9972	46.6916	68.8017	32.9207	26.0482	53.2767	15.0308	11.4615	11.5007	8.40759	20.2405	15.2404	5.63776	1.89496	7.47916	40.7301	28.4442	11.5365	6.38499	28.3337	42.9596	10.9235	21.4726	9.73854	10.916	16.8205	5.07664
Q13435	SF3B2	88.5897	97.3567	173.942	80.525	133.22	76.7322	65.3248	78.9189	27.444	26.5984	20.6613	15.9916	36.8347	30.424	15.1227	1.75349	14.2737	102.012	39.3178	25.1283	11.048	47.2086	119.001	25.4657	58.199	26.6545	29.6936	35.4795	4.41275
Q13868	EXOSC2	14.9569	15.9172	26.0583	16.0795	22.5132	13.4142	8.60394	14.1877	3.40752	3.54084	4.63806	3.59286	6.74909	5.11254	3.68884	0.631083	3.49844	14.0826	4.40924	3.21133	1.98702	8.65683	15.3577	3.34925	7.62844	3.06218	3.6216	4.1322	0.500805
O15355	PPM1G	120.69	101.281	205.689	117.041	168.568	107.481	75.7433	102.17	29.2807	28.3906	32.1543	24.7922	46.1333	34.0351	18.7278	2.25826	19.9549	108.9	44.279	25.6153	14.3639	67.7523	118.573	31.1098	62.4084	27.981	31.1535	32.9584	6.49634
P26639	TARS1	197.408	129.739	275.941	143.909	203.486	119.805	100.703	147.41	34.3736	40.5408	34.3255	25.3446	59.8533	46.9351	23.1468	0.983019	26.5646	153.123	90.8996	33.6688	16.5491	83.565	162.404	37.8	89.9526	37.962	32.2894	53.8437	25.9728
Q96CS3	FAF2	55.8155	40.2191	91.6245	50.406	74.146	45.2274	31.056	56.1396	12.9447	11.5708	14.8541	11.2755	18.7573	16.0499	9.24499	0.204085	7.76071	47.4748	23.9554	11.3526	7.01622	28.9456	48.2321	11.4788	24.7949	11.3346	12.3076	16.1737	6.34917
Q15223	NECTIN1	0.887895	0.334941	0.996776	0.146006	0.827171	0.660274	0.470333	0.277043	0.117164	0.606048	0.0205882	0.0930843	0.127808	0.187804	0.329121	0.0125133	0.217512	0.16831	0.659526	0.482349	0.902601	0.00361329	0.708764	0.295098	0.167878	0.66975	0.210405	0.146133	0.493609
Q9NZL9	MAT2B	155.183	124.051	230.816	128.848	183.108	121.349	96.32	131.717	38.7812	36.4156	37.9113	26.1959	51.0174	37.8758	25.4065	0.721218	19.3661	116.975	60.061	28.6723	15.577	69.1232	129.407	33.0682	70.7261	29.2403	33.9596	39.4131	8.99516
P48729	CSNK1A1	42.9453	36.8743	73.5606	25.0299	72.5092	25.6522	21.448	46.0995	10.0826	13.9912	6.73901	5.75901	12.49	13.9438	5.08226	0.891115	6.86776	41.0049	44.973	9.66399	6.29699	32.5595	39.8203	10.4096	24.0247	8.41162	11.2966	16.2468	14.2399
Q6IPM2	IQCE	10.1137	3.99764	16.6959	6.56122	10.3198	4.81261	4.92706	9.15552	2.22379	1.81724	2.0307	1.15244	3.06254	3.07778	1.34581	0.970933	1.65773	6.744	3.66305	1.32458	1.03011	3.02677	7.19547	1.5256	4.14749	1.78182	1.77625	2.90907	1.69099
P62877	RBX1	277.397	259.63	516.949	247.069	433.802	227.88	194.31	245.604	76.5324	76.2561	65.5564	55.2908	101.701	83.2054	44.8762	0.304587	42.8061	269.334	156.472	64.2919	33.7957	176.161	279.493	65.8742	153.531	69.8277	74.7492	100.271	27.8325
Q9NR31	SAR1A	93.484	74.2262	205.822	96.0674	128.696	86.3247	58.0663	112.171	24.0158	16.3583	29.7557	16.8351	52.5626	39.1474	9.69831	0.459358	20.8932	120.49	132.915	18.6082	16.0573	108.664	116.883	34.5792	60.2461	21.6113	22.4069	31.5714	42.2114
P57735	RAB25	151.401	134.012	220.202	131.283	162.62	92.4962	65.1014	118.091	23.3614	36.0778	37.4033	22.7471	49.2615	47.3295	23.84	1.00348	12.1847	127.901	75.8339	27.9958	21.8162	78.5798	121.595	28.2047	65.7984	25.7742	28.8581	43.7752	11.9088
Q15233	NONO	849.668	696.132	1429.55	742.253	1179.35	737.315	563.937	731.854	221.297	242.111	207.637	155.704	296.47	258.518	149.65	0.264839	119.891	701.476	276.436	177.215	89.8744	370.575	755.826	178.779	452.033	173.335	207.839	277.52	93.6665
Q9H3P7	ACBD3	54.7938	49.5055	97.3338	47.471	74.4607	45.7265	34.3625	51.6885	14.6606	11.9147	13.9835	9.38389	22.2466	15.4446	9.1436	1.45996	8.81802	46.7123	22.5841	12.2307	7.81369	31.1466	53.1588	14.0056	26.8834	11.5703	13.906	14.1976	3.02663
P78527	PRKDC	118.332	97.687	196.906	100.689	155.115	91.9753	75.4872	101.528	33.3769	29.9064	30.1214	20.3383	42.4585	36.474	19.7719	0.651397	16.7771	102.578	37.7053	26.748	13.7199	50.3552	113.737	25.66	57.8049	23.8335	29.1582	35.6139	8.79936
O43719	HTATSF1	17.8419	10.5383	30.6271	9.85663	15.0676	8.80418	7.37684	20.9392	4.49995	2.60955	4.46082	2.89887	6.99308	5.07081	2.46312	4.4796	2.92075	8.10789	11.0205	1.61139	0.713588	4.04221	7.88952	1.56595	7.10189	2.75673	3.32498	4.28399	7.52448
Q07666	KHDRBS1	417.519	323.026	624.524	425.47	531.849	278.037	223.169	422.364	89.9578	91.7873	91.3369	60.129	129.306	145.353	57.1835	1.18348	49.9104	317.985	177.589	114.097	38.3369	186.277	338.723	70.7789	190.692	121.713	116.756	118.5	37.4178
Q9P0V9	SEPTIN10	84.0677	54.5086	141.879	64.039	127.498	50.974	41.0099	93.7344	22.9063	28.883	15.6388	9.75242	25.917	31.9712	9.03014	0.852117	12.5561	72.6572	55.1047	21.7348	8.56253	49.858	73.8804	17.5825	39.1201	21.0089	20.5851	30.101	12.6257
P25685	DNAJB1	113.96	107.434	158.3	103.77	127.465	82.5805	70.2629	84.2628	25.0154	22.7023	26.7549	17.2463	33.011	29.4938	19.651	1.95874	12.2619	91.7338	39.1639	23.1974	12.3486	41.6168	95.1906	21.3587	53.8976	21.3199	23.0491	30.7319	10.4146
Q13409	DYNC1I2	105.772	86.2687	211.094	89.0943	190.464	85.5476	77.7037	93.9577	40.8239	46.2712	32.0692	19.8862	34.6638	42.7454	15.156	0.265598	14.3537	110.92	73.5003	25.1018	15.4043	76.9735	108.017	25.7638	58.1986	24.1353	27.8295	45.4369	8.16064
P49419	ALDH7A1	267.602	208.383	422.917	243.737	343.472	201.933	171.385	197.668	73.9427	74.7856	63.3694	36.2555	83.9979	83.1232	43.801	0.675618	33.3058	215.758	94.5282	54.3334	28.6188	114.437	220.507	54.793	142.272	45.9169	53.0377	88.2347	27.0708
Q15293	RCN1	246.793	143.776	395.46	174.76	256.119	177.062	151.758	267.671	42.1265	88.1018	44.0932	40.2818	98.2457	61.9423	49.1261	0.599802	39.1173	173.473	112.031	37.6232	20.5216	137.885	190.927	39.7073	105.739	43.2237	44.8705	70.281	31.8225
P46777	RPL5	1426.86	1092.31	2512.9	1142.4	1915.72	1026.64	832.482	1368.61	355.726	348.858	307.161	262.117	496.686	395.593	221.458	2.20266	194.169	1289.56	790.848	291.527	171.153	830.148	1291.06	318.521	691.32	295.567	349.473	451.947	189.644
Q9Y2W1	THRAP3	89.3317	72.3952	153.364	80.175	116.521	70.7649	59.2854	80.5767	25.3581	25.4309	23.208	17.4742	34.7918	27.242	15.0724	0.928625	13.8642	71.9071	24.255	17.8963	10.731	43.484	76.5802	18.5189	42.5123	18.6384	21.0941	28.564	4.67155
O15347	HMGB3	77.048	48.2073	107.115	62.9983	98.472	73.9965	40.2491	62.4187	21.8899	28.1854	14.7566	8.92924	23.5666	30.2456	4.1125	1.78434	16.2816	66.6557	64.5449	15.4508	2.92215	38.9671	65.7272	20.6464	41.8486	8.15525	13.2436	28.6117	7.65306
Q13740	ALCAM	6.05586	4.03706	14.1787	3.45172	12.1325	5.78506	3.28751	4.18263	3.03567	2.91658	1.54112	1.70412	1.91128	1.4598	1.67139	0.156377	1.13879	7.06827	13.829	1.77558	0.811181	7.78241	7.23245	1.71258	5.08242	1.73413	2.94519	3.65987	6.00815
P31040	SDHA	123.741	102.76	205.117	88.8524	174.03	85.0525	68.88	119.569	30.4136	28.0572	24.7466	17.9067	39.6015	36.051	15.3728	0.761412	17.168	101.098	103.469	20.8231	12.4365	66.6263	102.409	21.379	62.8899	20.1214	23.584	38.2006	73.8212
P42771	CDKN2A	79.501	62.3206	128.207	64.5666	121.729	71.8498	43.7186	65.9755	18.7925	32.9676	18.723	12.7578	27.1369	33.3278	15.4311	0.991771	11.2699	115.443	87.2141	12.5858	9.62042	79.6582	90.8679	19.013	49.2819	14.111	16.1453	38.681	14.383
O75347	TBCA	539.938	528.817	759.797	491.719	579.475	388.366	373.452	387.197	121.631	140.168	134.957	110.148	160.302	145.307	107.963	1.96351	68.001	484.356	208.139	105.76	52.6902	241.468	575.419	95.7879	243.961	92.2466	112.295	163.406	35.8916
Q7Z406	MYH14	278.317	224.9	456.721	253.621	374.251	181.416	152.282	261.935	54.6156	61.3873	72.6316	40.0498	91.8614	94.6112	48.8139	0.693299	25.7863	273.493	188.173	70.6614	41.6479	152.785	258.959	57.4646	121.78	66.553	75.546	78.3778	31.1635
Q9NQP4	PFDN4	184.118	189.971	297.308	184.376	227.011	177.061	90.633	125.063	45.6047	39.3869	44.1377	33.8376	59.5609	53.0353	30.07	0.456069	18.5313	170.898	100.85	40.8715	24.9338	106.405	164.959	41.4349	95.6072	41.4728	52.7739	58.8574	15.0349
P00966	ASS1	129.96	74.5515	134.245	100.588	107.017	68.6452	56.6027	80.7176	21.8913	19.4311	20.0273	13.2596	33.3242	23.4867	17.0607	1.92399	11.4092	83.7451	51.8065	17.65	10.5469	52.1947	87.1837	19.673	52.4109	21.1371	17.1077	25.6052	16.0809
P07954	FH	185.792	137.318	328.991	156.109	264.707	147.443	108.813	182.293	49.6494	45.4337	43.897	30.6305	74.4223	57.5856	24.8144	1.47505	30.4748	187.578	109.578	39.3624	22.8095	113.738	186.431	44.4184	90.9329	37.3125	43.3007	58.4432	27.174
Q9BY32	ITPA	71.5861	40.3447	112.166	52.0272	94.6422	52.5887	37.4885	76.4535	14.0259	25.149	13.6233	11.0386	21.8894	16.7124	10.6193	0.212256	9.78073	66.2375	66.0861	14.7648	11.6504	57.1191	59.3395	20.0217	32.9746	9.77441	18.5732	21.7809	9.09002
P63173	RPL38	778.909	631.9	1122.12	635.747	940.749	559.977	427.059	634.609	160.18	162.247	171.681	127.059	227.233	197.434	129.712	0.617103	92.8775	648.809	297.345	144.149	85.0641	369.699	670.885	164.333	387.182	157.686	170.121	213.718	84.8631
Q5EBM0	CMPK2	74.3043	58.8458	112.73	67.0176	77.6556	49.6457	39.5567	62.6574	14.134	17.4158	18.2711	13.1052	26.6751	22.0159	11.7353	0.588849	7.94324	57.6093	40.0812	11.3322	9.89928	30.7827	48.303	9.79687	29.0099	10.885	14.2902	20.1207	9.0264
Q15758	SLC1A5	230.528	170.396	270.667	187.032	198.129	161.512	135.488	141.332	54.0687	47.3221	55.5037	28.3786	51.551	47.3362	40.0847	1.64634	24.0967	181.291	59.4079	38.356	27.8117	107.256	172.547	46.9889	92.1817	37.5713	39.5453	56.0318	5.34727
P52434	POLR2H	114.91	90.9979	180.54	107.181	143.094	88.6839	67.1142	105.234	28.3018	26.8843	28.6166	20.4111	40.4409	34.5443	19.5826	0.801542	15.2325	96.5868	32.4313	26.0635	14.9686	50.4202	103.674	23.9378	53.6265	26.429	28.7275	32.4513	7.01506
O95831	AIFM1	102.465	115.402	125.922	86.658	98.4918	53.0357	69.6534	70.0417	19.7122	23.3968	25.3972	25.8787	28.8751	25.2971	21.2527	0.92132	12.8318	104.491	45.9264	23.3712	7.35315	60.3927	116.023	15.6123	41.6842	22.1583	19.7829	24.5874	7.58418
P50416	CPT1A	16.6587	11.2873	25.2732	12.3115	19.2451	8.95626	8.88379	15.5897	2.57259	1.88862	2.74097	1.80243	5.36493	2.91495	3.094	0.990328	2.45805	12.7814	11.1344	3.27568	2.07854	9.61775	15.7677	3.51739	7.6576	3.2941	3.11632	3.53536	4.4971
Q9UM54	MYO6	22.575	18.3007	41.0221	20.1933	32.0972	13.6232	11.4407	23.2438	6.24134	4.34976	4.32451	4.08822	7.13419	6.95365	3.39891	0.869754	2.61935	22.3399	26.6658	6.73349	3.09068	17.1537	17.9081	4.71228	8.96687	6.17132	7.93712	6.13222	4.27727
P62306	SNRPF	549.07	459.996	907.982	527.26	715.746	463.187	354.481	511.806	136.677	143.378	126.557	115.337	190.175	163.518	93.8996	0.515599	79.2324	419.757	218.264	118.297	57.0266	254.567	471.188	111.024	273.396	115.576	131.887	177.002	48.3542
Q9NR30	DDX21	247.711	231.279	405.368	196.407	320.003	210.945	153.08	213.434	58.4444	55.168	60.3111	36.5858	87.4067	57.9927	41.9425	0.203777	42.2237	210.083	125.46	58.8554	24.898	128.164	235.027	67.8453	125.139	63.1876	59.7497	63.4313	19.4015
Q4G0N4	NADK2	28.8407	16.9306	42.3137	20.2251	29.9759	15.1456	14.0737	26.5948	6.19562	5.40538	5.82539	3.66004	9.79835	6.68296	4.83141	1.10129	5.07164	21.108	10.3647	4.0657	2.80072	13.0585	19.1904	5.20635	13.2925	4.03098	4.01082	7.34679	3.21563
P53999	SUB1	3696.08	3045.96	5673.71	3218.74	4554.61	2725.67	2375.18	3045.8	851.017	838.461	865.865	669.232	1248.92	901.142	517.872	1.08685	430.073	3275.14	1449.5	758.348	445.205	2081.99	3392.13	844.815	1764.69	817.631	915.11	1094.74	298.132
P00338	LDHA	2093.08	1856.1	2951.11	1554.37	2373.2	1383.91	1244.07	1667.34	455.585	467.49	404.665	249.94	657.746	566.688	280.571	0.549767	221.066	2251.92	1446.3	491.757	228.041	1307.96	2259.78	436.663	1070.68	486.502	557.842	601.208	227.198
Q9Y3B3	TMED7	153.956	107.505	212.735	126.585	190.344	95.8487	84.3297	121.341	35.2464	32.7977	30.9718	19.9587	43.8865	38.199	20.0411	0.967215	15.4817	124.052	81.4961	32.2655	14.8805	82.8376	139.554	34.7545	70.5891	30.9416	33.6833	42.5831	15.7936
Q9Y617	PSAT1	87.9307	61.0536	97.5048	74.9661	73.348	51.5669	48.556	49.8474	13.3133	13.1195	18.1929	13.6338	21.953	18.1464	12.5383	0.826078	10.6225	63.3772	26.5242	14.8242	9.71466	37.1956	67.1486	15.8579	39.0991	14.4116	14.1909	18.0069	4.39689
Q5JTB6	PLAC9	0.111221	0.293815	0.898884	0.19694	0.0236035	0.0232787	0.568726	0.0995049	0.0478915	0.281004	0.580009	0.702844	0.270754	0.216049	0.827059	0.664746	0.0239145	0.0432658	0.439208	0.286208	0.691975	0.150177	0.540441	0.364865	0.471572	0.168108	0.0819346	0.305585	0.400524
P32455	GBP1	643.533	500.038	1047.34	611.423	806.411	496.427	432.305	565.247	141.807	203.51	150.765	130.332	236.122	193.573	110.677	0.719748	79.3337	607.442	340.207	126.245	82.6058	414.964	599.027	137.964	320.821	121.989	147.241	228.298	21.4556
O00244	ATOX1	173.511	139.716	327.775	142.646	237.729	144.002	111.279	187.402	53.0667	62.298	44.6919	40.7646	70.6269	56.9055	30.8779	1.54457	26.5149	144.124	81.9482	30.1795	19.6946	103.024	156.386	30.3117	92.4418	32.1288	40.3188	64.3766	14.3265
P62258	YWHAE	3941.62	3413.69	5651.79	3297.35	4676.97	2422.87	2232.6	3536.83	782.425	832.484	764.486	522.834	1159.45	1062.93	554.427	0.715941	411.098	3223.2	2283.81	943.929	417.649	1914.74	3356.6	715.072	1711.08	912.305	1013.01	1031.87	525.013
O00273	DFFA	32.9961	24.1724	49.4114	28.6842	40.9374	21.7557	20.1395	28.4356	7.43077	8.10244	7.25024	6.19658	10.6979	8.42347	6.29648	0.494864	5.18855	25.276	9.78316	5.68783	3.48325	14.3945	27.9195	7.21346	15.369	6.21569	6.39563	9.2599	2.32103
P62333	PSMC6	229.474	167.139	279.265	147.356	204.868	131.802	117.616	159.117	35.8865	33.8774	46.4959	32.6916	57.0722	63.9312	37.5133	0.285251	16.0443	151.356	100.434	32.2048	26.6738	77.2543	136.58	29.3308	98.4255	32.754	30.2687	61.5825	33.1106
P62847	RPS24	579.698	417.603	819.088	470.202	646.93	451.793	347.72	434.323	140.056	131.598	129.056	81.4566	160.951	141.564	91.1106	1.73175	62.1702	432.667	194.007	97.282	59.8501	235.358	435.507	106.518	273.628	106.571	113.771	170.895	66.2398
P52597	HNRNPF	417.345	327.604	686.034	353.476	542.457	333.427	258.771	358.568	111.037	115.923	92.4465	69.5079	146.463	113.482	69.7166	0.218905	58.2639	341.313	162.938	85.3228	44.3108	209.443	384.022	94.8939	208.416	82.5771	95.4487	128.876	43.5944
P33316	DUT	125.736	100.625	210.303	114.408	170.302	109.133	92.956	115.298	24.7938	24.5025	35.6162	24.2022	45.5901	32.8845	22.9804	1.55464	21.7425	96.7897	53.7111	24.2692	17.1414	71.7263	105.312	30.6913	61.5486	30.8318	29.6946	35	7.48378
Q15424	SAFB	68.9897	55.6629	118.281	65.1865	86.2445	55.8127	41.0867	63.3705	19.7645	19.074	17.9207	16.2014	22.706	23.5659	12.4488	0.490425	10.4645	50.3604	19.1866	16.2961	6.82548	27.0922	59.2125	14.3459	35.5736	15.7523	18.0655	21.7911	2.71366
P62899	RPL31	865.251	640.847	1203.82	678.543	966.61	617.777	516.934	694.471	205.583	159.84	199.168	148.688	237.979	188.873	132.04	0.289586	109.421	728.734	314.323	169.05	94.4611	438.413	806.499	200.472	373.168	184.898	196.675	220.363	63.5464
O43396	TXNL1	131.686	130.647	263.219	120.451	214.691	120.865	92.7678	122.885	34.1586	46.7602	34.2485	29.3446	47.0313	56.1576	25.3002	0.985472	19.2531	155.643	124.04	33.6917	18.9365	98.6351	132.306	35.2222	75.5552	32.448	38.9451	60.0189	5.12421
P46778	RPL21	711.949	548.804	1045.79	520.745	862.553	500.506	406	574.917	160.628	139.272	158.253	114.801	224.667	156.493	100.596	0.587364	72.9571	587.443	346.774	121.137	72.7865	411.093	622.689	163.232	337.755	146.616	160.4	176.121	106.417
P11142	HSPA8	4887.46	4222.77	8233.28	4341.28	6651.33	4085.4	3151.63	4445.56	1179.95	1269.3	1211.79	848.185	1721.14	1418.5	870.429	0.576626	661.943	4641.43	2574.66	1012.42	571.836	2591.16	4635.67	1078.82	2423.02	1007.85	1195.71	1512.49	642.508
P38646	HSPA9	1339.16	1109.35	2211.36	1150.57	1757.31	1115.1	845.4	1178.5	327	328.97	333.898	227.983	447.164	387.845	225	0.690916	179.703	1207.49	676.551	267.319	154.942	638.094	1212.03	330.757	680.81	286.632	297.602	399.182	142.141
P26368	U2AF2	234.697	189.909	326.467	196.152	268.783	183.001	134.091	152.853	57.6052	59.2169	53.1081	38.1461	61.981	57.7145	39.9755	0.797938	26.1125	174.458	65.458	45.5769	22.3694	91.8097	194.419	44.0844	107.28	46.0157	53.8115	64.2425	21.1579
Q53LP3	SOWAHC	5.01439	2.22821	10.0362	2.61616	8.53721	3.61675	2.17019	6.31063	2.30349	1.5626	1.27776	1.27572	2.51544	1.767	0.472036	1.87307	1.04711	3.22659	2.26896	1.19516	0.272943	1.81497	3.58372	0.74505	3.21386	0.424398	0.803424	3.02934	1.30692
O00764	PDXK	55.9763	49.6578	81.846	36.7109	70.6497	36.2671	30.0099	48.571	13.8488	14.7719	11.6502	6.37771	20.8249	16.8964	7.21667	1.8057	8.38189	58.9095	25.3583	10.8269	5.55496	32.574	60.6721	9.91642	28.3514	10.6468	11.7731	19.1123	6.68434
P14868	DARS1	213.715	181.839	346.344	188.493	281.267	156.072	130.323	192.273	51.2825	53.3732	45.7318	35.3356	75.2558	65.2069	33.6195	0.55474	31.0354	189.695	105.439	43.9235	22.1713	109.009	189.318	42.4199	106.648	43.4465	47.6503	65.7378	28.0717
Q9Y3F4	STRAP	158.589	123.355	241.68	136.204	203.387	122.123	89.1345	147.545	35.3938	40.8464	33.487	25.6027	49.7412	43.8823	27.7091	1.04314	22.018	119.049	71.7449	32.9681	17.9428	69.7548	125.064	33.3911	72.373	29.9327	37.0647	44.0008	13.3044
Q9UHX1	PUF60	65.5646	44.3286	107.185	62.6608	88.8424	49.4899	36.1259	57.309	20.1644	17.6408	15.7568	10.6962	20.9501	21.1027	9.14322	0.358491	11.8365	53.356	24.5649	13.4303	6.62444	33.8509	54.4278	16.2055	33.1441	13.2813	15.0365	20.8635	4.08339
O75907	DGAT1	5.43572	3.0392	10.7455	2.43036	9.23127	3.19801	3.21425	7.15771	1.97151	2.13121	1.13302	1.24856	2.15382	1.9644	0.541057	0.826111	1.2516	4.10644	2.30257	1.24458	0.417272	2.65367	5.32224	1.39105	3.76711	0.982675	0.806115	1.87412	1.63536
P00492	HPRT1	222.043	183.814	351.707	174.375	279.683	153.86	140.802	206.725	59.5066	60.1124	48.3221	35.6204	77.6955	65.2208	33.8081	0.828728	31.3754	209.107	83.0148	51.1678	21.9521	108.593	224.724	46.0699	120.902	53.8849	55.467	68.3469	16.7582
P63104	YWHAZ	4448.48	3990.76	7213.26	3401.33	5612.32	2917.77	2631.08	4204.31	987.432	1013.39	845.155	677.116	1547.27	1233.07	654.488	0.244822	496.434	5003.53	4094.79	1104.25	521.994	3255.42	4746.25	958.654	2295.23	1133.71	1275.35	1425.77	832.795
P31689	DNAJA1	62.1398	59.833	118.69	56.2308	104.336	62.3852	42.7032	64.5649	20.0083	19.2535	17.0563	14.2309	21.7472	18.9684	12.0998	0.470544	9.93834	55.6276	40.3671	13.3478	7.03417	37.9742	62.3752	16.1648	36.0087	13.845	17.2189	23.3642	7.21981
P51665	PSMD7	58.2342	59.2499	118.576	55.4803	96.6952	59.2754	41.1793	53.7253	17.888	17.188	15.9462	10.113	23.9374	20.6393	8.59648	0.8754	10.0717	69.0347	53.7034	15.8045	9.52977	48.7946	63.9909	16.9089	35.6246	12.6724	16.9696	23.2001	6.14262
Q9NYF8	BCLAF1	76.6196	56.6393	119.097	63.9522	88.8548	52.5234	45.0797	58.9285	22.4279	21.8131	18.6777	13.5208	26.2619	20.7045	11.8492	0.611075	10.2463	54.922	19.8322	14.285	9.01148	27.449	57.4363	15.7224	35.0687	13.4618	16.0462	24.0676	3.59482
Q14244	MAP7	8.23593	5.47574	15.9515	7.03045	15.8497	4.99322	3.07132	12.4395	3.29328	2.65991	2.29419	1.2504	3.29755	3.34943	1.83752	1.02811	1.67934	8.22427	5.58222	1.54168	1.17428	5.24491	6.47907	1.61316	4.9542	1.61657	1.83423	3.04596	2.11447
Q16666	IFI16	311.637	247.152	481.854	294.669	398.719	257.674	179.24	277.221	74.2495	72.5052	75.9229	58.9889	105.823	95.0562	50.1681	0.431965	37.5195	259.611	121.163	66.8944	36.9595	163.792	273.442	67.3884	150.931	66.764	80.6838	96.7292	19.5398
P46783	RPS10	824.537	626.991	1431.54	670.772	1136.06	669.056	517.13	742.694	231.949	171.746	192.717	127.366	287.484	218.449	113.156	0.489305	104.933	862.961	667.176	169.613	112.023	595.755	850.746	215.037	426.06	167.816	189.664	268.548	191.09
P53367	ARFIP1	23.8859	18.5399	40.6475	17.345	32.2484	14.8773	11.9712	22.4863	6.88479	5.1677	4.9835	3.29632	9.42797	5.6516	3.57289	1.01405	4.26009	24.0053	16.1301	4.58712	3.69955	17.7983	23.7133	5.30723	11.38	4.7342	5.31296	6.34601	2.79477
Q9BRR6	ADPGK	4.42854	2.25537	9.63286	2.46562	6.78954	2.84811	3.06518	6.68917	2.38625	1.7298	1.26811	1.4769	2.16405	1.59748	0.740237	0.97588	0.792889	2.17792	1.45298	1.12039	0.288917	1.80641	4.04878	0.967721	2.14945	1.03065	1.25353	1.94371	0.245629
Q9UBX3	SLC25A10	38.9167	31.9852	93.4903	62.1321	51.2528	29.6954	30.9239	30.7369	3.14611	9.23467	7.92554	14.2127	29.3215	11.702	4.97004	1.21637	10.4251	47.4213	21.326	21.1463	12.6276	38.2601	66.6625	25.6462	22.7911	12.0257	17.5197	14.8003	2.73016
O95373	IPO7	66.6365	51.2444	115.527	52.6545	97.0858	51.4897	40.2943	59.7246	17.5589	18.6581	18.2841	13.4786	22.1183	18.33	11.3446	1.02644	10.1429	56.1655	39.329	11.2293	7.4859	39.3473	56.5671	12.4154	32.5876	13.2773	14.4188	21.2608	7.73441
P16070	CD44	204.449	171.521	389.124	158.079	304.144	155.09	131.956	218.984	58.3706	54.6628	50.2057	37.764	83.9149	52.5723	27.7252	1.88444	33.7821	220.736	165.806	40.989	24.0276	160.44	234.635	53.1294	105.528	52.2801	50.0878	64.346	54.0853
P99999	CYCS	584.251	451.533	834.92	511.856	696.932	410.423	335.729	475.694	124.824	140.715	137.359	99.3086	173.769	149.059	88.5435	0.899229	66.3017	477.446	268.139	120.832	70.1789	310.188	502.648	128.703	262.426	119.501	142.189	160.292	25.7138
P05198	EIF2S1	320.242	258.936	505.52	284.813	396.572	239.933	183.014	291.516	73.6642	74.0039	75.6	59.0093	108.659	91.9161	51.9477	1.23787	45.8382	262.909	129.97	62.8292	40.9218	156.504	278.843	68.2203	146.407	67.2356	74.0066	89.4053	26.6005
P35998	PSMC2	155.582	131.751	239.298	141.684	191.028	119.829	90.9245	137.342	34.3244	37.8269	37.6677	30.8412	52.4433	46.929	24.3194	0.44228	20.9556	140.231	57.9193	32.4016	18.6707	72.3058	142.297	29.3219	74.9925	32.2948	37.0213	44.1891	15.3419
Q9NT62	ATG3	342.17	298.36	420.754	276.056	339.657	241.571	306.513	214.059	89.6186	69.3829	68.5779	54.8158	87.6791	76.6141	50.2506	1.30869	22.7125	241.958	152.494	57.4613	28.3717	230.123	274.55	59.1943	136.463	69.5293	102.519	97.0272	22.1903
Q5K651	SAMD9	25.1507	10.1313	29.797	16.4619	23.0252	10.3324	10.093	18.3848	3.75773	5.94476	3.29645	3.08675	6.12949	6.86477	2.44041	1.05458	2.46032	14.3553	21.6833	3.3422	1.76312	11.4718	13.8183	2.77299	10.4769	2.83688	3.32103	9.43234	6.36223
Q5JRA6	MIA3	23.7975	19.9416	46.6719	14.3173	27.3488	17.5374	17.0107	39.7857	10.1958	9.70809	4.07682	8.2748	9.74068	4.00225	10.0173	0.734221	2.65535	17.2032	11.3722	3.39722	2.47526	8.68882	17.4947	5.24937	7.69223	7.1242	3.89257	8.3915	8.42625
P30084	ECHS1	164.314	130.685	267.217	136.787	209.297	125.309	98.4613	157.366	30.8105	40.1538	38.7083	27.0015	64.317	53.7837	21.8807	0.937373	24.6358	147.834	102.645	33.8015	17.0043	89.6859	155.75	34.9957	79.2013	34.089	35.1199	53.2391	20.1198
Q9BZG1	RAB34	4.6496	3.42771	14.9895	2.62086	10.7323	6.23176	3.68914	7.23966	2.96312	2.10715	1.87821	1.31986	3.36914	1.92888	1.58638	1.13242	1.03609	5.42722	3.59604	0.873224	1.07944	3.70502	4.76126	2.00201	3.12024	1.68206	0.732994	1.98901	1.25786
P50990	CCT8	522.302	414.457	827.336	434.675	680.482	402.691	305.798	444.75	114.033	132.165	111.057	85.2656	178.416	145.758	76.1779	1.50593	73.1914	491.51	288.397	106.934	59.9328	304.968	516.215	120.422	266.423	109.702	124.628	164.845	57.1693
Q99986	VRK1	9.31498	6.8476	14.5828	6.57064	13.6733	5.26788	7.23604	6.28953	4.92285	3.42977	2.34827	2.31788	1.90762	2.73002	1.48624	0.440733	1.48858	5.96189	2.07514	1.88437	0.622839	3.43192	8.72391	1.62696	5.83128	1.40038	1.88941	3.18491	0.911636
Q9H4G0	EPB41L1	9.6439	5.24272	11.2848	6.15257	8.88157	5.31581	4.48487	8.56941	2.00001	1.34722	1.76071	0.909043	2.63552	2.05656	1.14453	1.07555	1.83203	5.9687	2.20266	1.71538	0.624122	3.82797	6.04132	1.68529	3.97306	1.54548	1.2369	1.88528	0.530086
Q16769	QPCT	54.124	51.168	72.6122	57.1979	64.2376	20.3469	21.9488	60.4588	6.72477	7.29601	10.8006	7.20228	14.686	19.853	6.2591	0.27407	2.96247	47.4469	42.5862	21.9702	9.13116	26.5499	39.7582	12.1373	18.6644	21.1092	18.5021	16.2085	12.444
Q6NYC8	PPP1R18	3.15045	2.47821	9.78691	2.02295	9.07073	4.53647	2.77921	4.66396	1.78231	1.60269	1.39756	1.14446	1.76148	2.35525	0.762998	1.04515	0.930415	6.43342	4.53401	0.638271	1.25215	7.03739	5.8512	0.955247	2.49645	1.02226	1.43151	3.18022	0.623191
Q9BUF5	TUBB6	664.132	513.544	813.433	604.555	680.589	417.39	393.184	466.055	144.858	111.028	143.053	105.915	172.895	132.624	87.4074	0.308681	44.9217	623.183	290.79	118.076	90.4498	413.273	575.436	147.676	289.957	154.113	184.976	178.74	46.2764
P06730	EIF4E	49.7269	40.5539	94.9162	34.3804	73.5769	31.2653	26.4456	54.9993	17.4558	14.2347	10.2511	8.07902	19.1737	15.493	7.04566	0.220465	7.59486	53.8524	57.2561	12.3137	7.30819	43.0835	50.2122	11.5228	27.9292	10.4873	14.5055	19.8168	11.517
P47813	EIF1AX	119.974	96.7936	210.43	91.3029	175.776	96.0671	75.5227	107.789	36.134	29.8203	22.1282	19.3823	40.7284	31.9565	17.3383	1.15289	18.9667	144.756	134.479	28.9248	13.7359	121.4	139.925	29.0558	68.0088	28.5355	32.8279	49.2407	34.3312
P13928	ANXA8	125.076	95.6741	166.269	115.069	157.907	55.779	55.8014	156.085	22.0278	22.1821	19.51	11.294	31.4826	49.0105	13.8677	0.681995	9.07218	111.073	136.162	56.3575	21.579	97.6802	109.663	26.3345	50.6745	48.0132	55.2333	29.4091	28.3368
P45880	VDAC2	1018.33	774.684	1554.87	864.071	1131.8	670.366	525.665	854.74	201.813	212.548	227.214	152.966	394.163	319.773	139.293	1.66586	128.142	1050.86	517.498	202.473	114.018	542.563	1030.37	203.293	486.602	204.304	206.447	304.565	169.982
Q4V328	GRIPAP1	8.2385	5.99883	20.1387	7.22175	11.8154	6.4422	4.0798	9.73861	1.7064	1.03683	1.83935	2.17335	3.8258	2.74934	1.74733	1.18768	1.62504	7.76171	14.0527	2.63055	1.07134	7.15739	7.15468	2.7933	3.95875	2.18331	2.87608	3.04884	3.49271
Q13451	FKBP5	77.2452	50.1344	128.807	66.4046	102.148	63.3235	55.5632	78.5258	22.5805	20.8865	18.1169	12.2632	28.5365	21.9341	11.2864	0.44091	11.7518	60.0704	40.1842	17.1883	9.88653	48.1765	61.1712	16.7847	36.9861	13.1063	19.9502	23.9806	5.16229
P22223	CDH3	22.3412	14.1806	30.7757	19.5804	22.6716	13.3836	11.3781	16.1301	3.94245	4.61759	5.29232	3.79204	6.66722	5.43961	3.96173	0.245086	2.45101	20.2163	7.21681	4.25615	2.54661	9.78811	19.9285	4.63691	12.1006	4.73205	4.03119	6.8356	1.18722
Q9Y3I0	RTCB	245.498	203.821	416.908	215.967	352.398	211.025	156.014	206.34	72.2329	64.0637	65.7238	49.6237	88.7164	80.1763	37.201	0.761965	34.8114	225.703	121.523	52.0601	32.3647	138.821	223.503	58.8345	117.241	48.1016	63.435	82.3913	15.2825
P51572	BCAP31	680.494	539.745	1079.17	551.491	875.325	498.76	385.824	584.716	164.938	158.342	160.52	100.881	232.457	194.906	94.2102	0.963474	70.4259	640.482	403.701	148.038	88.0024	394.902	631.815	138.895	298.365	144.17	172.299	188.738	101.718
P08579	SNRPB2	105.291	79.5114	152.132	80.3172	124.31	92.4185	64.2946	84.8645	22.6238	36.0879	18.9367	16.7203	33.2262	24.9206	15.8631	0.192249	15.2559	84.4898	40.9867	19.4893	9.43305	49.9476	90.0634	24.6247	46.0935	21.8239	27.2199	29.2448	7.40639
O60784	TOM1	86.3845	53.2439	150.867	76.3011	112.818	54.6444	42.4417	91.9816	24.0556	19.8352	17.9186	12.986	31.9175	24.5584	11.3193	0.602263	10.6536	90.7135	80.8042	23.3855	11.1247	56.3974	90.7495	18.3664	40.8557	22.1439	21.5868	34.3773	18.2218
Q02543	RPL18A	523.478	452.078	808.617	434.145	638.646	404.558	312.465	425.775	131.673	108.845	127.829	95.1563	170.528	132.889	79.9291	1.02891	66.6436	499.753	240.302	106.384	61.2818	311.111	501.912	127.411	239.578	120.568	137.309	140.663	42.7803
Q86U42	PABPN1	195.002	157.116	321.311	179.14	262.146	157.682	133.054	167.549	54.0389	51.3674	48.251	36.5961	70.4257	56.9175	32.3301	0.77251	29.0401	178.663	57.7031	43.4297	24.4426	105.976	190.604	46.7663	98.6018	44.713	50.4563	61.1393	15.3454
P19338	NCL	1328.42	1181.71	2235.73	1308.02	1776.2	1292.19	960.571	1079.58	380.035	335.449	377.035	249.738	479.528	388.867	241.149	1.38676	187.997	1198.3	463.665	318.511	178.991	678.751	1263.26	354.163	662.447	315.811	370.943	384.591	80.5662
P12270	TPR	80.0416	69.3368	152.779	83.0531	116.937	77.3884	53.9298	75.6023	27.2601	22.9123	23.4687	17.0387	31.2266	28.2671	15.1354	0.980768	12.6007	67.1318	24.6935	19.4345	10.7266	34.1758	71.8102	20.4998	41.5227	18.4562	22.6389	28.8606	6.54271
Q9HCY8	S100A14	1525.34	938.642	2011.26	1204.2	1337.92	550.374	668.906	1524.27	202.961	288.548	211.052	160.143	447.493	433.602	177.566	0.945479	119.805	1307.74	1115.5	432.881	193.406	818.741	1093.06	309.997	522.975	411.93	408.949	445.026	212.463
Q9P0I2	EMC3	24.8942	18.3244	38.6342	19.8987	32.5791	18.0856	12.0961	21.8636	5.46035	5.76152	5.92673	4.42374	7.62468	7.70427	3.47955	0.402811	3.92304	19.9541	9.28958	4.96345	3.14265	11.1307	19.304	5.33059	11.4097	4.66283	5.35855	7.31652	2.29738
P68036	UBE2L3	295.408	256.472	413.663	263.33	391.242	222.126	170.071	245.851	63.5398	77.2594	62.2965	43.0598	82.8734	86.5351	41.4845	1.09643	33.846	288.045	177.176	75.3032	31.9265	175.294	279.373	64.2203	152.29	72.2793	77.0133	90.939	20.4375
Q8TC12	RDH11	26.8641	19.9528	49.1022	22.6754	42.6786	24.972	15.0571	26.9953	8.02343	7.28045	8.41178	4.08607	9.96156	9.67787	3.49211	0.830545	4.05634	26.6962	14.2338	5.48511	4.02711	17.9693	27.2279	7.83398	16.1877	6.07657	6.68913	9.35641	2.51791
P49736	MCM2	90.7105	73.1835	154.398	72.2366	127.23	75.6798	64.4417	73.0475	27.5864	22.8936	24.1803	14.2535	31.2349	26.8554	13.9904	1.37096	15.7992	75.5802	45.1983	22.6116	10.6487	58.8502	99.541	23.1234	55.0331	19.5376	22.7745	32.4376	2.04515
P62750	RPL23A	2535.41	2012.96	4094.94	2070.6	3200.57	1884.47	1555.33	2203.73	610.165	519.991	593.386	435.433	881.214	621.915	396.187	0.305095	328.841	2272.13	1472.72	480.9	314.303	1452.35	2380.75	605.999	1174.07	517.91	567.039	673.282	422.071
P09661	SNRPA1	276.477	224.949	417.51	254.983	343.006	236.361	185.674	234.619	72.1994	65.7116	73.6979	54.8008	93.0159	86.4884	42.9007	0.84469	36.529	232.321	72.7237	69.4246	34.8868	134.439	237.893	64.3671	129.695	67.8153	77.6324	86.1945	4.1226
Q8WWQ2	HPSE2	13.3151	10.7811	34.8561	11.8029	24.6106	12.0919	10.7773	19.4129	6.02464	3.60686	4.69381	4.35499	7.47639	5.87701	2.05324	0.255729	2.96391	22.3589	28.9279	4.19778	3.23879	21.4823	13.7083	4.86257	8.59482	3.8823	4.04284	8.32338	8.48092
P18077	RPL35A	477.8	398.357	668.58	400.746	563.887	370.544	287.674	367.05	110.329	97.0603	114.425	82.0725	157.935	121.484	74.1629	1.18724	58.1458	426.093	169.04	93.9816	59.9144	260.484	433.781	110.399	219.478	105.622	118.748	132.791	24.2683
Q13243	SRSF5	224.928	179.889	353.002	203.416	282.801	177.115	161.301	188.874	62.9464	44.4299	61.8509	46.0746	79.8732	62.5444	39.1041	0.376562	32.1506	163.202	68.9825	48.4358	31.057	99.3643	195.976	54.3243	97.5966	43.9729	55.211	65.3524	12.5383
O95757	HSPA4L	25.4202	21.9552	45.9465	27.4581	41.0334	25.9913	13.4746	26.5511	6.71752	5.46435	8.05884	5.12894	8.54179	8.79118	4.26752	3.42157	3.40358	25.563	9.92074	6.96821	3.89916	14.5079	24.2808	7.21578	12.6949	6.60425	7.22053	8.14777	1.2285
Q9UQ35	SRRM2	25.6422	17.0101	39.188	18.819	32.9003	17.601	14.6855	21.5487	6.3807	6.70381	5.37123	3.70207	8.18299	6.21175	3.82112	1.16824	3.90942	16.0866	8.61157	3.89249	2.50435	9.32956	20.2372	5.5686	12.0722	4.16184	5.02935	7.14769	3.53473
Q15646	OASL	43.7885	23.7241	44.8372	32.8947	34.564	20.5252	19.3977	28.7976	5.01376	6.0704	6.4117	8.02743	8.79202	9.7824	6.66895	1.73223	2.73184	25.6669	18.9665	4.8279	3.71818	13.4366	26.8375	5.04145	17.7751	5.89188	5.96872	12.7426	5.4589
P07900	HSP90AA1	1397.02	1263.82	2452.66	1347.52	2084.09	1290.44	973.577	1304.31	368.019	379.629	368.374	254.36	501.226	424.684	239.292	1.00447	200.436	1442.57	840.117	316.884	183.771	943.761	1461.47	368.984	795.19	314.932	376.211	476.601	173.063
Q9UL46	PSME2	1152.55	942.302	2170.22	1076.42	1602.71	992.369	793.133	1135.94	327.359	386.085	304.523	243.102	482.725	412.54	202.078	0.817592	163.173	1096.02	525.043	240.675	159.094	660.195	1094.63	244.776	586.645	231.905	281.813	447.044	114.226
Q9UL25	RAB21	194.812	154.581	270.292	147.698	230.366	113.369	104.865	173.315	38.1083	55.3368	35.9837	28.3166	63.7603	56.8607	27.9482	0.96849	24.4654	237.113	205.269	39.4865	20.7966	169.855	199.16	41.7816	101.625	42.9388	43.2927	70.1107	36.8562
Q05315	CLC	214.869	344.444	359.308	116.85	335.427	284.803	243.581	228.373	191.484	34.5555	58.6073	34.3829	72.1076	45.3101	31.3233	0.680092	19.4807	193.608	190.599	68.6551	34.8081	158.412	210.014	58.0389	107.231	65.4457	78.755	86.1182	79.7424
P61353	RPL27	956.707	776.504	1563.5	783.813	1246.18	703.311	564.023	876.246	215.116	216.239	204.682	170.039	306.365	237.092	150.045	0.198394	121.953	923.062	1042.87	192.171	107.025	769.591	838.4	228.418	472.515	225.47	233.681	289.57	236.58
Q9BUJ2	HNRNPUL1	73.261	54.6142	134.04	64.7224	108.644	59.8227	45.1818	64.5596	25.3444	23.7637	20.6838	14.8503	26.1931	25.3663	11.6468	0.398971	10.8345	62.9814	35.8289	15.814	8.41622	39.3449	69.5104	16.0422	37.8717	15.3387	17.4452	26.3742	5.95096
Q13045	FLII	27.4749	21.8859	44.7285	24.2053	38.0199	19.4014	14.1645	25.9483	6.61799	7.36489	5.72991	4.6798	10.0408	7.68679	3.78332	0.639269	4.19406	25.3497	16.6182	5.48766	2.58527	14.9648	29.1873	5.93775	14.0206	5.34105	5.99708	8.75412	5.70785
P10809	HSPD1	1615.47	1359.83	2543.97	1506.64	1975.33	1420.62	1042.48	1195.06	384.588	429.794	405.379	267.945	556.293	508.914	270.206	3.01522	206.205	1601.12	601.093	343.874	200.422	799.946	1569.14	399.857	841.245	351.961	378.603	554.442	114.703
Q06323	PSME1	1811.01	1428.3	3035.75	1617.92	2371.04	1461.08	1227.48	1568.43	476.25	536.311	445.341	328.973	622.567	543.239	303.531	0.530241	223.07	1737.05	875.076	386.224	220.377	1071.46	1770.89	383.522	900.673	382.276	453.852	643.069	159.819
Q5VTQ0	TTC39B	72.0035	34.0739	83.8102	53.4727	66.6555	35.9688	27.5496	49.6775	10.6831	13.9985	10.772	6.82854	14.9003	17.924	7.65635	0.942361	6.26687	41.8491	43.0166	16.7969	5.26116	26.3912	39.5042	9.73398	31.8918	11.787	16.7983	19.1233	8.77524
Q99832	CCT7	335.422	293.367	549.34	300.623	454.725	283.992	225.419	284.503	78.1242	90.9519	83.9358	63.0757	115.605	97.8092	58.9197	1.11731	46.5771	309.417	157.595	70.434	44.0092	189.172	319.725	79.7759	171.067	72.7537	84.6951	109.649	24.1623
P42167	TMPO	105.692	81.5947	176.953	76.5437	127.016	71.811	68.5903	85.3516	32.398	26.7832	23.8313	16.9985	33.6778	27.6263	14.4612	1.44671	16.7595	74.4498	36.0714	20.3592	7.4843	50.556	90.2534	18.67	51.0991	20.3156	21.5589	32.5174	19.6157
Q86X53	ERICH1	0.277831	0.259899	0.982025	0.552487	0.0112201	0.169187	0.267647	0.172779	0.438292	0.963686	0.860623	0.232946	0.625186	0.674685	0.680726	0.0122145	0.0230013	0.0546011	0.0677597	0.834078	0.522648	0.714871	0.559713	0.55193	0.0620464	0.106013	0.432034	0.774023	0.831376
Q99798	ACO2	293.061	224.574	493.71	256.318	410.928	232.227	179.241	267.88	69.945	80.4668	71.8608	48.6851	101.008	94.4927	45.858	0.360156	38.0524	291.56	203.465	53.4464	35.0816	191.53	256.403	58.431	154.258	57.5519	61.3369	105.297	57.9981
P55769	SNU13	555.461	542.525	906.201	567.653	462.01	230.15	274.23	757.032	136.7	74.6004	137.767	63.9429	226.334	188.102	65.4686	1.02274	52.4184	550.788	467.804	237.394	134.858	438.625	453.438	183.082	266.987	183.141	235.706	128.598	26.4837
P30419	NMT1	81.4238	71.66	142.084	76.2453	109.752	70.6209	48.6317	79.3912	24.1616	16.7843	21.3326	16.5842	35.4057	23.1595	16.5968	0.207702	12.2252	75.7987	42.7789	15.3735	10.6706	43.9177	76.8269	16.5589	37.8007	15.0028	20.1492	23.5259	14.1316
Q99439	CNN2	92.8976	90.3756	175.367	66.476	133.298	71.4839	59.3544	78.019	35.0515	21.7081	20.067	18.2917	40.0606	33.2093	11.8771	1.41757	12.1564	149.666	130.543	26.5171	15.4669	123.952	148.828	26.8491	65.1658	29.7344	35.6341	46.7374	31.6262
P62906	RPL10A	629.671	474.998	1019.9	424.287	826.739	471.558	385.436	578.026	177.74	149.198	139.553	99.4707	208.856	173.265	95.35	1.43631	82.4923	549.63	323.938	134.875	78.6299	343.512	765.661	144.896	384.319	121.319	163.558	194.075	109.998
P09110	ACAA1	49.5798	32.3224	61.9051	40.2444	45.3538	27.3184	22.9152	35.8803	12.3261	9.72045	12.6873	5.83259	13.2419	15.2802	8.64038	0.629992	4.19973	34.3293	10.478	9.62577	6.47793	16.2521	33.9422	6.99045	19.503	9.45017	9.0109	12.8066	1.96858
P07195	LDHB	1839.35	1600.47	3149.47	1662.9	2619.76	1609.67	1250.85	1699.64	450.759	459.439	440.711	336.212	656.568	509.946	343.672	19.6749	260.394	1806	955.449	379.485	216.052	1091.36	1874.42	418.83	988.09	402.27	424.7	578.296	349.084
Q9H6S3	EPS8L2	13.4478	9.64905	20.9475	10.6605	18.9511	6.81995	7.12082	12.8039	2.64249	3.21754	2.69992	2.01699	4.45056	3.4896	1.44033	0.994656	1.44079	10.1181	9.36251	3.13318	2.17534	7.70855	9.94362	2.72682	6.36717	2.31695	2.27585	3.77023	2.28587
Q15393	SF3B3	153.524	131.155	234.368	158.069	192.972	137.806	95.5785	113.479	37.9966	41.0418	42.9471	28.4327	48.1422	50.8926	25.8033	0.414462	19.3002	133.105	48.715	39.2727	19.807	65.5697	136.304	38.4114	72.4591	36.3013	44.0424	47.2124	4.50592
P07919	UQCRH	60.8975	35.7497	101.538	45.475	76.0151	36.0476	33.5234	57.1255	19.7878	15.8799	12.0582	11.6325	20.59	18.0006	8.96233	0.948043	8.72593	52.3853	27.9351	10.6338	9.00941	36.4478	53.2207	13.058	25.2584	10.194	12.7768	23.1909	4.2696
O75436	VPS26A	293.379	200.405	407.784	259.244	310.076	156.98	143.611	266.573	49.3404	57.4527	53.8231	49.2137	84.4905	68.4781	45.4228	0.692995	32.0945	240.104	176.19	62.7239	30.0044	128.58	271.186	59.9083	123.644	66.7821	63.6407	79.3551	50.2336
P62829	RPL23	622.755	504.742	943.261	474.202	755.351	473.017	374.57	499.495	151.114	132.688	144.881	105.805	197.111	157.609	97.0087	0.54032	75.9082	535.499	251.003	127.734	76.5684	322.188	583.09	143.312	299.114	134.937	146.769	171.231	63.8356
P42224	STAT1	888.432	775.97	1605.13	840.506	1229.56	747.177	616.854	833.253	210.835	315.556	228.317	181.868	341.728	326.425	166.076	0.649145	123.944	894.545	479.125	201.333	114	502.784	845.033	193.326	430.413	201.314	234.159	339.128	58.5658
O60684	KPNA6	31.0493	23.3949	62.6581	34.0782	38.0204	25.7172	19.2448	39.8123	5.96966	5.68743	7.02067	8.24735	13.4039	11.1895	5.9007	1.01796	6.83617	25.6783	15.0063	6.9889	4.40795	18.5208	23.8221	6.55192	16.4161	7.57424	8.608	10.558	4.10976
P06733	ENO1	5757.28	4917.53	8449.27	4587.04	7160.08	4250.35	3660.34	4911.61	1269.57	1369.44	1277.79	842.527	1835.51	1571.96	950.318	1.98584	643.466	5789.11	2863.48	1298.12	646.936	3025.88	6056.96	1241.8	2917.58	1369.45	1485.89	1633.58	773.17
Q15370	ELOB	274.623	205.423	381.916	236.57	326.077	188.201	162.502	220.088	68.2736	60.0374	61.2081	38.3319	96.2555	72.5092	35.9986	1.02015	35.9379	255.296	115.114	54.9911	30.2641	160.194	277.336	64.8126	129.933	52.3461	65.7782	75.095	26.8324
Q8NBJ7	SUMF2	32.5694	41.8186	63.9345	27.3471	56.8536	31.5702	24.8781	40.6139	13.5612	11.484	10.3071	9.60144	15.3167	11.2758	6.42828	0.486758	5.01342	27.5731	13.2199	7.45979	5.0401	20.8405	25.9801	5.40361	15.4358	10.1107	9.96505	12.693	3.61206
P49327	FASN	97.5692	76.3836	148.475	78.4228	115.664	68.5009	58.1563	89.4147	19.9035	18.1131	21.0264	15.0811	32.1756	26.4874	14.6365	1.46353	14.1797	74.6817	51.0544	22.086	13.9959	52.602	89.2384	19.9539	46.6952	19.4356	25.8624	27.8525	5.25604
Q92616	GCN1	16.2343	11.857	23.281	14.801	20.8682	13.2559	8.68611	13.5991	4.48943	3.36702	3.65593	2.62745	4.55966	4.40132	2.74347	1.51629	2.00366	12.3015	5.75303	2.93672	2.01011	5.94139	14.1197	3.35495	7.69864	2.21044	3.63113	5.1067	1.08844
Q99714	HSD17B10	403.42	345.842	648.867	378.858	505.466	299.077	234.458	353.708	86.0562	121.125	97.6115	71.8511	146.8	146.486	72.9535	1.22265	50.6089	440.666	215.324	84.7935	45.7799	232.347	383.904	78.5225	208.903	96.543	92.2441	159.79	25.2468
P63220	RPS21	758.265	673.411	1278.27	660.24	1091.99	655.316	500.436	601.61	164.094	234.402	177.93	126.084	252.826	265.879	117.662	0.0850003	100.625	941.24	522.966	180.829	102.357	547.652	851.601	207.457	418.381	181.385	205.351	292.521	98.5859
Q96A26	FAM162A	40.733	40.063	95.8228	40.8965	64.2751	45.0586	30.9062	61.4315	15.1577	5.74718	10.4584	8.47522	23.3563	17.0688	7.88393	1.35273	8.94848	50.6276	50.5783	8.97758	7.61292	41.3087	33.9888	9.89278	25.6334	10.263	15.5961	15.5845	13.7705
P62136	PPP1CA	125.959	119.125	192.55	101.115	141.99	86.1339	90.44	101.539	26.982	34.2257	30.6002	23.7293	46.2673	33.3695	22.0603	0.660669	17.1545	115.609	51.6851	27.387	15.9698	75.4404	132.187	27.0069	63.8786	29.2739	30.9721	37.0521	3.71596
Q99873	PRMT1	248.921	230.94	394.538	246.755	299.696	209.979	173.725	233.681	64.8617	66.1998	66.7729	51.1215	83.8506	75.9102	51.7912	1.00102	33.2088	214.989	78.7481	63.617	26.8414	113.301	231.727	57.9002	122.153	60.6037	66.9249	75.7577	9.63176
Q14444	CAPRIN1	147.434	120.595	231.752	133.677	214.201	119.053	85.4039	115.672	37.3579	30.8581	39.7825	24.3086	51.2466	38.8378	24.2789	0.63105	22.6684	137.24	94.3666	29.8491	21.7224	97.1952	146.655	39.087	71.7253	33.3597	36.9331	37.1413	15.9965
P40227	CCT6A	242.451	193.464	381.318	218.605	307.325	209.187	152.905	200.057	56.4299	72.1588	51.2628	39.4281	81.9246	72.8523	42.5193	0.929723	28.2073	243.899	140.055	49.6298	27.6688	141.265	235.429	52.5653	122.641	49.3301	56.4013	84.692	25.5374
O95433	AHSA1	54.5109	47.7465	91.8476	58.2195	83.6712	58.0392	40.9683	46.5867	16.3194	18.6667	13.1314	9.49031	14.4614	16.5022	10.3091	1.51628	8.76637	45.6717	27.0678	12.1801	5.31232	26.7472	47.2583	14.2569	33.9644	12.8962	14.2632	21.0507	4.48864
Q9H3U1	UNC45A	17.1774	13.1539	28.6945	15.5009	24.5158	14.2861	8.1158	17.469	2.9775	4.41621	3.72438	3.67004	5.69474	4.95235	2.30284	0.312018	2.83407	19.3235	17.4674	5.03397	2.09813	15.8284	19.1349	5.48029	10.0064	4.68399	6.17646	5.08769	1.88619
Q15366	PCBP2	378.772	339.054	591.216	339.419	468.125	304.157	256.294	310.909	90.1225	86.4345	94.1669	72.5367	133.329	111.624	65.6641	0.572755	52.0113	363.565	176.332	85.7659	51.7759	236.944	380.64	91.5598	189.306	89.7587	100.549	115.298	12.2515
Q9NX58	LYAR	42.4078	40.5895	54.0951	53.7263	47.8807	26.1234	25.4813	15.3561	16.5175	18.5876	7.4089	6.6848	14.9159	11.3872	6.90236	0.696252	6.49861	29.283	10.3749	8.90518	1.74058	18.6625	35.9099	6.00328	18.9043	12.4254	15.5267	13.9963	2.18734
Q6RW13	AGTRAP	90.0422	75.1137	141.059	81.8978	124.075	73.6161	49.6186	80.5629	23.7832	29.9943	24.9071	15.2763	25.3288	28.4616	16.8132	1.19557	10.5642	84.3145	40.4532	16.5017	11.2469	44.5839	74.1878	20.3209	45.9584	18.2524	20.0741	29.3616	7.30254
O00193	SMAP	192.705	159.254	300.361	156.346	240.269	151.518	120.336	167.674	44.8235	51.606	42.3862	39.6635	58.79	48.172	36.4836	3.22778	28.0953	156.298	82.0814	33.3275	18.2143	114.619	166.828	42.1526	100.748	40.881	42.5418	57.4617	13.1
P55072	VCP	733.856	611.801	1186.21	661.511	1064.24	555.844	497.984	807.848	179.592	160.343	147.282	118.674	243.436	225.563	103.7	1.43395	92.9395	746.159	552.352	234.318	116.861	447.907	1076.34	187.167	481.719	197.48	258.269	212.341	171.181
Q16531	DDB1	132.524	116.384	203.361	117.513	163.287	94.1527	79.2504	104.737	29.4914	30.2983	33.7359	22.3312	44.1754	43.4528	20.0795	1.21856	14.402	114.155	56.3066	31.2011	17.9845	59.4921	117.424	28.8721	63.9623	29.8129	32.4218	38.5777	7.86446
P18621	RPL17	964.509	764.679	1565.85	796.796	1232.41	725.591	592.735	827.984	233.028	234.159	223.838	187.104	327.002	267.773	154.928	1.75165	118.568	918.186	451.371	210.713	119.183	549.765	939.792	227.915	480.133	213.698	237.849	297.003	100.026
P55265	ADAR	55.6613	52.53	95.9982	57.4215	76.1568	51.5697	37.2388	50.8705	14.7216	15.7302	16.0545	11.4014	22.1521	18.1039	11.2486	0.816557	9.17092	50.7574	21.6381	12.581	7.59476	29.0637	51.7687	13.8157	28.176	12.7365	14.8587	19.0351	1.67638
P62917	RPL8	607.905	495.534	970.943	514.793	774.786	473.719	369.28	525.137	144.972	144.302	141.511	113.602	208.438	169.116	91.2102	0.914313	73.8135	559.347	337.607	127.393	79.3967	376.76	552.636	148.572	293.385	127.393	150.669	192.266	51.594
P17987	TCP1	361.27	297.604	594.905	307.632	480.019	300.448	228.452	299.716	93.3683	92.5883	85.6232	59.7598	122.176	100.582	62.8999	0.705847	47.6324	346.187	224.764	72.8921	40.6935	229.204	350.425	82.899	183.435	75.6466	87.4269	120.711	45.4913
P18859	ATP5PF	528.329	400.359	919.907	441.289	721.551	416.864	331.746	454.805	160.706	170.768	136.914	83.8972	172.242	178.283	86.0828	0.318709	63.5079	466.967	316.067	93.1376	67.8561	297.301	466.857	113.908	270.106	91.3453	106.889	196.494	80.9612
P08195	SLC3A2	183.632	147.152	215.722	174.935	177.767	152.698	93.5963	106.225	42.0472	28.8269	45.0967	26.1942	49.5989	36.3888	31.9287	0.548727	19.2155	138.992	74.4172	35.8066	19.6297	76.8153	148.016	48.3492	84.0775	39.0388	36.8637	37.7639	11.5253
Q99733	NAP1L4	238.513	185.571	402.564	224.383	332.772	189.64	148.325	245.095	51.2927	65.0326	52.6888	44.8922	87.1216	76.4149	43.4636	0.562159	34.4101	215.737	137.624	57.1297	26.7237	137.467	226.438	51.8677	112.634	58.7986	64.3512	76.1139	30.0696
Q8TCT9	HM13	121.025	102.335	227.236	128.263	151.114	108.579	66.2415	111.707	26.4388	37.4885	36.2917	35.0272	46.9164	49.8451	22.1788	0.867623	13.4146	128.116	47.122	26.1157	21.0578	51.2954	95.2556	24.7443	57.875	27.9539	30.9333	45.2725	11.3771
Q96PU8	QKI	30.4434	19.0837	54.132	22.6303	42.6419	18.1223	14.9914	32.3806	8.98526	11.7227	7.62396	5.5393	13.772	10.3294	4.04139	0.583037	6.25337	26.3564	18.2512	4.88982	4.4996	21.1525	27.5145	5.80505	15.106	4.60439	6.34872	11.3468	2.74657
Q9BXP5	SRRT	70.3557	60.235	120.305	64.0057	98.5909	63.6172	45.3337	57.3748	19.9536	23.9086	18.4096	14.0518	24.2926	24.4413	12.0465	0.453843	10.9236	62.2183	26.9141	16.5231	9.17841	35.474	66.214	16.4452	34.8539	16.0563	19.6763	25.0625	2.30412
Q7L014	DDX46	58.251	52.3582	95.4417	56.785	78.8261	51.2323	36.9773	44.1263	16.3236	15.727	16.1413	11.2731	20.5553	19.5866	10.3272	0.967256	8.17975	47.7751	19.1381	12.3611	7.63233	27.0344	49.6972	12.3553	29.9968	12.1408	13.5655	18.5745	4.07584
Q6NVY1	HIBCH	23.2174	18.7068	34.6692	13.5154	32.9877	15.3444	12.7568	16.9839	6.81301	5.36421	4.05597	3.07032	6.71041	5.33103	2.57627	0.897942	3.44152	20.321	24.9496	4.93752	2.63064	16.6566	22.288	6.06752	11.2763	4.70344	5.62877	7.28233	4.54943
P50914	RPL14	1123.7	916.252	1730.85	951.496	1402.62	863.137	652.876	818.515	253.13	255.7	252.186	188.968	341.674	277.016	182.608	1.75639	116.668	1062.79	580.805	212.986	148.255	686.394	1030.7	268.822	554.715	257.131	266.287	329.633	155.578
P54105	CLNS1A	47.42	38.6629	87.5738	42.7395	71.8976	47.4567	28.538	44.0358	14.5873	12.2585	13.0224	9.05176	17.3237	15.7674	8.32593	0.807499	8.28642	51.1693	63.4962	8.89357	4.86938	40.7688	44.42	10.9586	26.5937	9.66558	10.959	19.2593	15.163
O14617	AP3D1	11.1946	6.80889	19.5827	8.13648	14.7651	7.67313	6.10793	13.7404	4.01645	4.69649	2.08935	2.57859	4.065	3.83092	1.97903	0.0838728	2.00282	9.52149	6.72054	2.35504	1.09608	7.47989	7.37566	2.10693	4.5928	1.5257	2.25519	4.32032	1.24994
Q5T749	KPRP	1392.98	1235.79	2081.5	1071.54	748.58	261.505	848.437	1938.64	335.207	273.577	250.333	128.694	569.847	245.253	254.238	0.967313	100.604	1473.72	1859.65	529.345	321.066	1171.93	1006.54	508.301	537.58	468.727	507.181	324.981	967.619
Q9UBB4	ATXN10	35.8462	26.0689	49.8918	30.8967	45.5479	30.5475	24.116	31.5648	8.51465	5.8173	7.73693	4.82597	12.1739	8.36772	7.09923	0.409418	5.96839	33.5046	20.0297	7.79939	3.93445	22.2714	36.5564	8.76204	19.2213	9.34622	10.0894	7.66248	2.50512
P35659	DEK	279.106	261.714	460.967	259.385	374.503	252.483	208.668	227.187	80.9015	78.9149	74.6197	62.99	99.4744	86.4948	48.2541	0.405267	40.1355	246.297	87.6658	69.3559	35.0315	138.009	272.782	76.0087	154.62	67.7382	83.2231	100.245	7.00998
O75533	SF3B1	83.9858	93.0636	116.336	69.9089	91.6328	68.6472	54.1794	55.996	19.4604	28.7216	16.877	12.3256	29.344	28.6444	14.739	0.7135	10.4005	81.19	22.2596	24.8466	10.5082	32.0554	111.833	20.2025	48.0539	25.3884	31.4962	34.1728	1.34059
Q16718	NDUFA5	249.393	227.842	384.211	279.539	302.139	202.224	168.203	185.33	59.0166	61.9067	64.5868	46.9166	81.5392	71.7937	38.5076	0.138701	28.1406	227.076	131.92	58.7839	37.2192	132.833	257.318	63.2069	124.959	55.2507	65.0231	72.4916	21.0356
P62081	RPS7	328.048	243.683	430.973	251.103	327.935	269.957	193.181	210.03	91.9025	60.8409	70.8742	31.8175	85.0502	70.1973	50.2218	1.61709	24.081	258.657	157.934	60.0455	38.551	171.786	264.055	67.2918	148.231	57.073	66.0852	85.1553	46.6184
P29692	EEF1D	573.724	503.142	1014.48	494.323	930.25	447.68	411.526	506.171	189.322	156.707	139.122	105.422	189.702	177.365	88.1603	1.56477	80.3996	585.356	322.143	130.6	74.8813	392.127	600.539	146.032	308.463	138.918	169.043	210.702	95.6093
Q96TA1	NIBAN2	117.533	78.1252	149.107	103.564	132.127	54.2221	51.6398	116.433	19.5367	26.7456	17.7563	14.3663	31.9686	36.7891	15.9862	0.801356	7.61603	109.163	60.4359	31.6098	14.7258	50.4431	90.6271	21.3856	48.1953	31.5014	30.1844	37.5661	18.9647
Q15388	TOMM20	150.348	140.95	215.983	166.457	155.377	151.699	107.595	91.9762	37.1072	39.7823	49.8765	29.8661	49.9174	46.6827	26.7726	0.379921	19.3908	133.253	40.5164	34.6407	25.7045	73.0214	117.498	38.0677	60.6866	30.6307	36.1479	34.8847	4.75598
Q13442	PDAP1	179.861	147.306	254.723	192.962	225.926	152.875	115.061	154.262	22.5486	48.2403	43.4817	43.8314	45.9075	50.5481	35.3889	0.44461	22.2261	145.913	65.7736	45.9714	21.3846	75.5082	149.667	40.3443	72.1499	37.6796	52.0677	53.9244	21.0419
P0C870	JMJD7	0.00607489	0.845851	0.868762	0.758276	0.103234	0.0759414	0.462233	0.330691	0.806765	0.0249914	0.562759	0.803311	0.839538	0.863935	0.529398	0.600927	0.180331	0.854739	0.26214	0.768777	0.24227	0.205478	0.229166	0.171066	0.0707399	0.273215	0.169966	0.281399	0.0497973
P61026	RAB10	338.551	210.112	450.392	256.127	358.159	203.644	170.077	248.873	55.4751	89.6257	54.1428	43.6271	93.2051	99.4519	44.2551	1.25844	29.8202	332.469	265.142	64.3267	38.5871	212.679	296.653	61.0057	162.5	61.4481	75.6816	126.305	51.3997
Q13564	NAE1	14.019	9.82109	24.5126	10.5704	21.5823	10.4974	8.36711	14.9651	3.69996	2.93187	3.4003	3.05682	4.54066	3.6672	2.71144	0.947131	1.94423	11.8351	7.1536	2.48524	2.08887	7.94725	13.0082	3.15149	6.66152	2.79707	3.31719	4.41758	2.35956
O60869	EDF1	36.479	29.4696	59.5727	32.2439	50.4962	33.3575	25.3177	35.678	10.631	11.6956	8.09961	6.2993	11.969	9.50383	7.81791	0.197784	5.21132	29.802	16.6022	8.15184	4.06913	20.1825	32.0141	9.65289	17.642	7.54398	10.1485	12.9159	2.08139
Q08211	DHX9	303.571	247.083	501.462	278.272	411.296	265.877	203.507	253.037	86.0085	85.0893	80.2539	52.0381	108.491	94.2047	49.2664	0.410282	42.0409	263.78	122.714	67.9406	34.2476	155.185	297.085	69.5752	155.398	63.0779	77.8927	98.2722	36.0485
Q99471	PFDN5	41.7078	36.9754	68.6411	41.6692	54.0751	41.6635	27.2134	32.7695	11.6697	9.18595	12.1496	8.02374	13.8078	13.4125	6.90341	0.403654	6.46437	39.8478	17.8592	8.41141	5.75209	23.3831	39.7545	11.0477	21.9028	9.27378	10.3907	12.9457	3.12576
Q16186	ADRM1	106.875	85.3415	154.103	92.2751	128.129	73.7945	62.3864	94.2776	23.8951	25.0074	22.1617	19.4696	32.0089	23.79	19.5595	1.22007	13.352	85.3901	51.2548	20.4397	11.0028	52.8315	92.4666	23.1634	49.3872	20.1579	22.1532	27.7768	13.8682
Q01813	PFKP	103.14	79.1784	154.577	82.9222	126.731	67.7133	59.1342	84.9775	20.7541	30.335	19.5096	15.2555	33.2647	30.7238	13.8922	0.358331	13.1005	94.0833	71.6327	23.5022	11.6153	62.2281	96.0984	21.9411	51.7016	21.0519	25.5519	35.3817	8.48071
O75947	ATP5PD	175.417	125.074	327.874	155.479	261.052	128.19	114.196	155.704	63.7813	51.9548	40.5851	24.7806	63.937	69.041	24.635	1.69436	24.3084	187.08	147.731	39.5199	23.7284	124.145	158.692	42.4686	88.9771	35.3679	44.2191	73.4674	25.2074
P0DMV9	HSPA1B	3008.7	2405.49	4560.91	2540.77	3481.06	2158.49	1734.29	2422.21	685.187	692.589	704.372	396.657	1021.88	892.831	474.63	1.45329	376.684	2770.93	1785.74	636.311	337.831	1528.99	2752.27	585.859	1426.23	587.639	688.013	807.522	434.409
P56192	MARS1	70.7918	51.4275	109.337	59.5641	94.7472	52.394	40.4252	60.8235	14.4282	16.418	14.6423	12.0729	20.7549	17.0658	10.2936	0.539678	10.6216	54.044	36.398	14.2383	7.52693	34.9168	56.1369	16.3356	34.0445	14.3366	13.854	22.7256	14.3717
Q86U06	RBM23	0.734074	0.0789851	0.997482	0.657455	0.0987274	0.573398	0.0754785	0.0106633	0.487862	0.78577	0.197266	0.841244	0.233019	0.594609	0.962776	0.384696	0.022665	0.0765982	0.799681	0.693049	0.116739	0.17714	0.231768	0.373744	0.0784962	0.917013	0.590136	0.9249	0.737527
P12544	GZMA	18.5701	9.1775	35.7557	9.20954	32.0766	9.87243	12.7919	8.07675	10.5215	12.7969	5.41131	2.60495	4.52807	8.70572	1.73746	2.04679	3.4843	18.8684	9.84332	3.40101	3.17667	13.1399	23.6655	3.34267	12.3868	3.49767	4.29305	9.90108	3.54624
O75934	BCAS2	60.7994	53.8264	78.6728	53.8681	64.2889	46.3516	32.4794	35.4853	13.928	12.3107	15.37	10.9304	16.7927	15.2414	11.0064	0.198025	7.53509	41.7667	14.8332	13.0476	6.69087	22.2429	50.3124	15.3326	27.3315	14.6019	15.5012	15.0572	1.71566
P49756	RBM25	33.2163	23.7972	46.6996	24.8282	36.6401	23.3329	18.0043	25.0609	7.99879	6.54398	6.94068	5.4034	10.242	8.4236	4.54076	1.27317	4.92586	21.5127	11.2365	5.95994	3.1038	12.6975	24.805	6.97965	16.0412	5.48867	5.8198	9.40593	2.08509
P35268	RPL22	2484.59	2200.26	4159.63	2101.27	3259.7	2048.17	1623.07	2162.79	597.998	600.956	623.252	462.132	895.925	681.788	415.244	1.66301	326.934	2351.1	1187.08	530.038	326.377	1521.1	2404.08	605.693	1260.36	561.016	643.914	770.665	321.751
Q9UNE7	STUB1	24.6426	17.9571	33.1208	18.705	27.2041	14.7492	11.9636	19.1455	5.12513	4.16929	6.21844	3.60036	7.29857	5.49022	3.24467	0.276256	4.65323	19.1976	12.0057	3.76901	2.78581	13.4856	19.5981	5.29026	10.5926	4.17575	3.80476	6.1268	2.67538
P26599	PTBP1	557.241	451.921	857.035	464.348	720.669	457.751	367.758	399.848	159.33	144.489	120.305	78.8751	163.266	150.133	89.7636	0.596983	64.9461	506.933	303.334	123.986	63.8375	341.067	535.753	130.433	284.25	116.92	141.625	183.974	58.1048
Q92973	TNPO1	44.3145	36.553	73.4418	43.064	63.2198	37.7453	26.1014	38.8736	12.9719	10.8882	11.0225	7.94582	15.633	13.9309	7.13063	1.51434	6.4176	38.9687	19.8723	9.98247	4.92481	24.8726	38.443	11.58	22.647	8.62274	11.4907	14.5695	3.0853
P11387	TOP1	165.086	117.632	227.162	142.455	177.3	109.692	94.4847	128.266	30.4763	42.6205	32.8044	32.0051	47.1073	50.0276	21.8545	0.236891	19.6677	129.465	77.148	30.5058	16.3575	75.2944	125.76	30.8046	75.3593	37.2271	37.7486	56.4479	6.26223
Q7Z6B7	SRGAP1	61.6907	50.22	104.573	54.3181	91.7838	42.389	42.406	65.4497	19.8344	17.8177	10.9671	8.42517	24.7031	17.8669	10.2049	0.543276	7.38003	77.364	48.4354	15.6606	7.85632	52.4206	78.0309	13.1439	37.9898	16.5794	21.0908	22.6807	14.9698
Q9Y5Z4	HEBP2	125.764	94.7134	161.107	107.76	145.665	78.3058	65.4526	87.3954	25.254	30.2039	23.476	15.1563	36.0552	28.7079	15.2519	1.02769	11.8157	117.987	94.5422	30.4793	16.4384	92.6533	117.18	30.3086	44.8434	25.0301	31.6544	31.4943	18.4103
P16401	H1-5	1149.12	1282.21	2089.39	843.192	1832.33	890.429	855.259	958.504	498.471	281.406	270.579	202.888	346.334	384.867	161.101	1.99727	104.64	1229.02	540.933	426.135	186.927	611.475	1261.28	400.496	743.676	388.393	451.006	486.473	67.6878
P14618	PKM	5432.55	4490.71	8395.19	4543.66	6678.66	3947.51	3394.9	4815.34	1131.01	1388.65	1201.43	840.27	1956.51	1524.51	939.19	1.04421	649.566	5497.4	2996.15	1231.21	639.423	2877.84	5786.79	1159.69	2706.09	1250.72	1341.84	1620.55	859.735
O43324	EEF1E1	65.0732	52.7073	97.4985	56.5163	86.1972	51.2552	37.0769	48.9593	13.7453	17.2586	14.1543	9.7049	19.4732	19.9619	9.71376	0.327818	10.1415	62.2763	49.8157	12.7874	6.97436	40.3508	56.6264	16.7816	34.0924	13.5194	13.8411	22.1993	6.49634
Q8IYB3	SRRM1	22.6385	15.7696	34.3034	20.7813	27.7531	17.4541	11.5434	17.5573	6.44222	4.01075	4.31774	3.32241	6.17894	5.66944	3.4735	0.527777	2.92513	18.4218	17.0647	4.00661	2.13651	12.9847	19.0458	5.59953	11.1723	5.42753	5.087	7.31913	2.72543
P05387	RPLP2	4211.86	3523.51	6809.07	3357.75	5659.83	3068.86	2625.35	3779.73	998.306	1019.76	930.098	733.683	1346.1	1116.23	668.973	1.60785	561.168	3754.43	2315.24	892.321	525.155	2421.92	3987.53	1007.64	2129.4	897.161	1055.42	1329.35	675.517
Q9Y295	DRG1	46.5244	39.3876	75.2721	44.3464	62.5894	43.1999	27.7399	33.988	14.5493	11.243	13.6674	8.97366	14.2862	13.5591	7.36537	0.876655	6.25776	42.0085	20.8532	9.26589	6.82553	25.5983	40.8784	11.6731	23.9176	10.368	11.8401	13.3696	2.31232
Q13242	SRSF9	143.67	113.891	218.068	138.635	169.972	119.381	96.9588	105.259	32.1338	36.1383	38.0805	28.0431	42.514	43.5232	22.3618	2.78418	18.4433	121.997	80.7839	31.377	16.2692	82.8721	121.186	32.4767	67.6134	30.4546	35.3988	41.6894	2.67542
Q14677	CLINT1	78.4008	69.3579	120.189	68.119	115.744	55.1683	46.0722	71.5083	20.2323	21.2013	18.9256	12.938	24.5874	19.0553	14.9122	0.0966906	8.40014	68.0839	51.0575	18.1574	12.0385	54.2308	72.3184	20.7365	35.5202	17.8841	24.4634	20.8692	7.34205
Q96I99	SUCLG2	171.225	126.479	256.448	143.449	177.946	106.032	92.3026	154.904	37.2121	41.7556	38.414	28.4425	57.3441	51.1869	27.3493	1.76218	20.8135	144.6	66.5761	33.5507	17.7372	79.0412	140.811	28.4742	74.2417	34.8165	35.203	49.0558	18.5101
P24666	ACP1	324.931	250.031	498.404	282.794	402.019	234.45	178.424	293.112	70.1159	78.0212	68.1524	50.1996	97.4018	96.6248	49.9761	1.44475	38.003	286.699	206.845	83.723	34.6128	161.028	279.001	75.8255	143.382	78.7087	83.1666	93.1195	34.3456
O75643	SNRNP200	62.3242	50.5889	101.247	56.4604	84.9852	53.9173	39.3897	48.7728	18.212	16.3491	15.885	11.4106	20.1273	19.0772	11.1227	0.479702	8.5627	57.9274	29.7562	14.4725	7.60382	30.8035	60.6908	15.5685	31.8709	13.8063	16.7416	19.6805	3.77484
Q5T750	XP32	194.873	172.322	325.076	122.394	105.286	57.1919	131.235	248.206	53.1793	44.4223	37.3482	16.5839	91.0762	25.244	31.1611	0.902965	20.5181	160.479	160.945	59.47	38.0543	121.784	145.538	66.5115	85.0426	53.2406	54.7772	47.3309	36.283
O60506	SYNCRIP	296.629	232.874	446.309	248.638	368.678	240.568	189.28	229.407	73.224	79.8381	69.9901	50.1179	90.245	79.9076	49.9899	1.05097	37.5485	239.357	127.935	56.011	32.1589	139.594	250.423	63.4946	139.717	59.4187	67.2694	85.2745	32.494
P47897	QARS1	112.433	95.0279	198.252	95.8472	158.738	89.7905	67.1961	114.453	25.6469	25.9533	27.7028	19.8761	43.4864	32.4853	18.9692	0.359605	18.2101	105.651	59.1255	23.813	15.1111	68.7236	107.829	23.5302	54.5187	23.2247	28.7538	33.4033	34.1371
Q01650	SLC7A5	106.98	86.3277	139.598	92.9877	112.869	82.8221	53.7456	82.1123	22.5532	17.1395	26.3829	18.7005	31.9683	21.2275	21.5391	0.985234	14.7755	86.3693	31.8876	18.9255	11.3493	52.4384	87.2209	28.3856	50.69	22.7648	23.3723	22.4272	8.70326
P61421	ATP6V0D1	51.015	34.4158	82.6058	30.6521	59.3322	27.1165	26.5612	48.8077	10.2364	18.447	8.29275	8.2888	23.0603	17.2215	6.03766	2.22388	6.85246	56.0296	26.6511	9.8541	5.88235	29.7492	48.9389	8.84067	22.4407	10.1878	9.6829	21.8049	7.02351
P35244	RPA3	7.3803	3.85136	12.8739	4.29959	11.5865	5.73811	3.96592	4.02375	3.64784	2.39817	1.57016	1.21539	2.33929	1.87176	1.36424	1.00896	0.910428	4.43285	3.91474	1.66517	1.0311	3.38143	5.52903	1.96313	3.78241	0.580305	1.19354	2.99792	0.557056
Q9Y5B9	SUPT16H	92.7081	79.0564	149.946	87.3875	111.99	76.7409	61.684	72.0806	24.0587	24.7153	25.1188	17.0041	34.0129	26.9375	16.6569	1.09802	12.636	89.917	39.1428	23.604	13.6353	51.981	89.2214	25.8879	45.2788	21.9695	25.772	26.2184	0.365884
P25205	MCM3	102.953	73.8218	159.804	85.3806	126.823	79.3843	72.1235	76.8222	28.7155	26.7906	26.5582	15.4278	32.4603	27.6346	19.1025	1.96489	16.3393	81.2083	33.1091	21.9435	11.6557	51.7092	86.3725	22.8624	50.5524	18.9556	22.3293	30.7783	5.0056
P17931	LGALS3	986.012	874.99	1635.46	800.212	1279.3	590.701	610.982	869.339	215.767	295.344	207.498	147.132	346.184	305.937	122.694	0.196703	103.702	1057.74	834.641	247.778	134.944	667.387	1036.59	198.353	483.77	225.469	279.84	339.157	238.288
P13693	TPT1	604.134	648.161	885.398	504.051	774.218	425.806	367.694	630.474	113.536	118.577	110.078	97.1707	185.675	185.36	62.9484	0.763539	82.8056	535.373	505.558	207.904	97.8147	462.205	556.107	142.835	284.859	174.835	221.589	172.215	57.4412
O15511	ARPC5	131.737	111.435	247.815	129.824	202.553	102.428	112.529	140.188	37.6166	55.6785	28.532	26.2344	60.0507	51.7135	19.6824	1.39091	22.158	204.466	89.3241	40.2872	22.0772	129.301	206.94	41.1384	77.3299	41.1556	49.8446	69.231	10.2022
P17066	HSPA6	347.34	363.39	548.584	379.696	431.453	305.731	285.585	293.1	84.4712	80.7255	100.609	53.5461	132.557	103.462	67.9057	1.4653	41.6321	415.752	176.861	92.3929	62.9677	253.952	385.376	101.376	184.856	95.7867	107.904	98.9979	18.4739
P22570	FDXR	37.8826	25.8067	59.5137	33.1594	46.2395	23.1935	19.0054	33.1525	10.7069	10.5126	8.81096	4.49432	13.0897	12.1419	5.57692	0.744956	3.68381	42.8709	38.979	7.43335	5.1972	33.4434	32.0813	8.80413	17.2105	6.87784	7.69494	13.691	8.2448
P35611	ADD1	18.8209	14.8595	37.8484	10.1498	28.4725	11.3627	10.8502	19.1051	7.36007	8.34464	4.3194	3.5932	9.00131	8.13354	2.02613	1.02546	3.57688	30.0426	20.498	5.20969	2.12934	17.3873	27.8843	5.6217	12.0655	5.15346	4.61823	8.31755	4.77212
P0DPI2	GATD3A	23.6004	16.4193	43.9662	17.0263	33.1974	17.8128	13.1615	26.4103	7.17994	7.84522	4.97899	4.98016	9.72719	7.28584	4.02483	0.795957	4.29755	21.1953	17.7485	3.58523	2.61153	16.1088	21.7599	5.09564	13.585	3.45714	5.54881	8.5301	4.13514
Q9Y3C8	UFC1	41.5938	40.2146	73.5205	41.4525	61.0955	32.4298	30.1109	36.5865	13.345	10.6269	14.3629	7.22317	16.8747	13.3935	5.86384	0.35539	6.87019	47.8043	24.384	10.4359	8.47652	39.5562	45.7777	12.9527	17.4527	9.27293	12.6407	11.9712	3.03326
Q14166	TTLL12	91.5657	64.9528	120.709	76.8556	99.3339	47.9177	44.1836	88.8117	16.768	17.7284	17.5237	14.6745	25.6195	24.0947	14.4703	0.125151	10.8463	75.3806	43.9615	20.8861	11.7017	46.7662	69.3447	18.4771	41.3241	19.7846	21.1779	23.8949	8.21147
O43670	ZNF207	134.702	115.078	191.986	130.064	176.67	106.784	83.1453	110.832	36.3597	29.9503	32.0795	21.7909	38.3178	41.5685	17.7185	5.14058	18.478	104.8	53.6882	34.7106	15.3576	67.2633	119.214	29.1474	66.0823	31.6498	36.4812	37.8723	4.91481
P09914	IFIT1	143.581	135.294	211.479	148.538	162.484	126.46	82.2194	127.515	28.5823	31.2558	39.6232	31.5446	51.3304	40.3075	32.6983	0.810741	12.6425	126.044	93.6142	25.2289	20.1779	72.0736	116.974	29.3462	65.1669	28.5804	32.0793	42.8512	13.4094
Q9NX24	NHP2	59.8909	43.0426	88.642	55.8589	70.232	46.1627	31.349	48.007	17.4414	15.4793	14.3631	9.25585	16.0516	15.3002	10.6939	0.724649	8.2452	47.3844	30.2527	10.5722	4.80417	30.7672	43.81	14.1587	27.4956	12.4736	12.78	17.733	4.06856
O15372	EIF3H	54.8594	51.4985	91.4245	44.1709	78.0503	45.3228	34.8733	49.3256	14.8347	11.7176	12.5144	10.038	19.3462	16.153	8.75583	0.992767	7.58928	44.4308	32.4022	12.9351	8.9723	32.3022	54.9218	12.0213	28.7448	10.6999	15.5384	15.5089	6.82434
P50552	VASP	195.402	235.356	396.057	136.752	285.683	173.573	180.114	228.21	97.8311	53.6275	42.607	31.7295	87.3866	65.8204	35.274	1.42588	25.7944	253.429	224.475	54.2376	25.9989	141.832	247.945	48.1779	106.994	55.7808	59.5498	75.5923	67.6098
P78371	CCT2	374.094	292.073	560.815	309.053	448.863	305.12	244.843	288.767	91.1638	92.3888	82.9966	59.8788	108.485	98.2456	58.2666	0.599436	45.7579	317.365	203.899	66.8324	42.1267	204.868	324.738	71.3213	180.821	66.2361	75.86	117.594	70.4648
O75964	ATP5MG	719.195	602.446	1231.52	682.325	954.292	626.319	454.421	620.38	184.402	211.008	181.611	125.357	257.751	240.449	106.008	3.17886	96.0649	723.135	451.117	157.841	86.9612	430.253	675.039	168.692	373.353	170.157	175.185	238.286	87.6094
P05455	SSB	239.182	192.72	413.535	236.428	306.574	217.051	163.728	203.661	71.5487	77.0196	62.3461	48.7409	86.425	76.5097	42.994	0.931465	31.8193	214.237	100.231	52.6521	27.5702	130.51	209.177	51.2522	118.022	51.273	63.0725	84.0833	17.8425
P56385	ATP5ME	549.88	493.937	931.634	478.167	720.748	502.908	336.885	392.033	129.074	166.387	153.101	84.0379	198.987	189.221	93.6984	1.13767	72.5291	671.791	534.298	121.996	65.8698	435.913	585.09	140.049	311.574	128.845	135.425	194.924	88.1805
P61254	RPL26	1201.68	974.38	1887.79	957.169	1463.53	894.603	716.87	997.737	277.295	264.187	272.329	225.311	411.747	307.464	181.791	0.0875799	150.5	1041.62	591.845	241.045	144.394	678.847	1116.72	284.045	564.001	255.049	283.847	331.6	188.087
P60174	TPI1	3027.07	2437.95	4342.21	2500.56	3597.18	2091.36	1878.4	2551.16	685.784	746.659	608.55	419.695	920.473	793.822	479.282	0.34285	331.028	2786.34	1950.09	724.344	346.677	1796.32	2888.42	643.148	1433.1	692.374	769.995	884.168	333.318
Q9BWD1	ACAT2	13.8456	12.2115	34.2433	10.1482	26.4224	10.1617	9.3553	25.6456	5.77386	3.72165	3.60584	3.06091	9.26571	6.01178	1.25556	0.334767	4.30215	16.9405	18.126	5.76953	3.27793	15.0487	16.2529	4.12954	9.49449	5.29417	5.46324	5.41248	4.59313
P56182	RRP1	53.0111	35.4819	76.3891	38.1212	67.5388	36.4914	26.1536	42.4771	11.9087	10.356	13.7666	7.06412	17.7761	10.9797	9.05218	0.13361	7.62324	38.4173	22.5945	11.0261	7.31636	27.575	54.8996	10.8683	19.1006	10.691	12.4693	11.57	12.8458
Q99615	DNAJC7	49.316	45.3692	94.0786	52.0017	71.3619	47.6859	37.2866	48.9278	13.3623	12.1861	14.1553	12.5734	21.3248	15.0249	8.8074	0.325264	9.06382	52.2118	19.8234	13.1081	8.31686	28.5977	57.6926	14.0438	28.6822	13.8013	16.5628	14.1159	5.5283
Q9Y2W2	WBP11	20.4853	13.6869	29.9722	16.7559	23.4446	14.3296	11.1365	15.5567	5.63172	4.36492	4.20325	3.62014	5.62897	5.4246	3.16088	0.265197	3.3303	12.9998	6.38934	3.99347	2.47999	9.00686	15.639	4.72675	10.0685	3.94789	3.83267	6.37517	1.00016
Q14683	SMC1A	40.2827	30.8164	75.5004	30.8276	61.9101	29.3572	23.0846	48.0231	14.327	11.0935	8.685	6.05864	14.2485	10.739	7.79102	1.30012	5.15747	40.9142	55.0035	13.565	5.21694	29.508	37.9776	13.1336	18.5483	14.6761	10.6008	15.2704	7.31949
P30153	PPP2R1A	154.251	132.784	245.263	129.405	211.659	114.375	88.7963	132.726	39.5547	39.8039	30.6233	24.7321	44.8048	47.9594	22.0188	0.596956	17.1115	171.12	171.638	38.3929	20.1346	122.326	147.677	37.1053	82.5915	34.1	41.834	56.8735	38.8456
Q9BRJ6	C7orf50	21.9843	24.898	41.0031	20.6153	39.0158	29.1482	18.321	10.5016	11.0424	10.1577	7.80801	5.55789	4.03574	7.36982	4.4853	0.286142	2.81535	26.3198	12.1093	6.1117	2.88141	14.4696	23.9711	9.09084	15.7085	7.05696	8.76909	10.6686	0.959059
O75607	NPM3	18.4697	12.2918	30.1189	16.912	23.0026	18.3392	13.0378	14.8586	6.2719	3.77121	4.7076	3.10964	5.95314	4.50777	3.71369	1.70221	4.42531	13.5868	3.65213	2.89102	2.25915	7.67289	14.4051	4.56096	10.8784	3.97949	2.98079	5.68236	1.51549
P27694	RPA1	74.3963	67.4461	114.281	53.984	92.0117	59.1005	50.2056	56.1892	20.6834	20.9693	17.5819	11.6946	21.0666	18.8022	13.5678	2.62761	9.18833	68.6815	19.4407	19.4495	9.80483	35.6861	69.0753	17.9961	34.1281	18.8965	19.9465	21.4947	3.47202
P07814	EPRS1	89.8063	66.8944	143.338	75.2493	116.856	72.6396	53.6312	80.2405	19.6565	19.8084	19.7157	14.2163	32.3287	24.3245	14.4333	0.75359	13.1095	81.2464	60.5613	17.5344	10.6412	58.4682	79.4442	21.2335	43.0624	16.9071	19.1566	26.7894	18.2114
Q15428	SF3A2	59.4481	46.0572	104.801	52.9138	75.9384	56.6951	38.749	55.2103	16.3468	15.995	13.5894	11.2497	23.7675	14.7815	9.73681	0.475831	10.6457	48.9	28.3307	13.4297	7.45142	34.1965	53.0807	13.188	28.8128	13.8013	16.2444	16.5992	7.12658
P07355	ANXA2	7038.34	5460.77	11345.8	6014.45	8461.2	4345.35	4028.71	6722.12	1386.65	1676.36	1527.85	1062.7	2565.68	2266.1	1122.69	0.752788	707.855	7558.07	5100.47	1746.05	885.489	3804.85	7421.93	1303.97	3289.53	1744.33	1852.97	2249.19	1898.18
P17980	PSMC3	137.021	102.48	165.178	109.266	138.947	78.8627	77.2214	92.4564	25.742	28.7704	24.0945	18.3249	30.6666	31.2982	22.0569	0.937888	11.998	99.9561	64.7412	25.629	14.5237	57.9507	102.772	22.1336	59.8416	26.9416	27.0607	38.9583	15.8975
P61247	RPS3A	699.169	592.109	1017.48	541.139	810.471	521.188	427.831	565.209	161.378	141.453	147.739	116.021	223.438	165.938	107.936	0.656478	83.5222	583.843	335.957	144.141	83.1771	369.809	630.864	163.708	320.826	147.998	163.272	179.046	99.1518
O14879	IFIT3	70.7667	81.4961	123.343	87.9366	96.0419	71.6662	43.0084	63.9881	15.5181	19.3516	28.0018	18.1207	32.854	27.7305	18.9748	1.5889	7.24345	84.608	43.3618	12.1848	14.8932	44.3989	66.7204	17.6551	39.7124	15.4091	17.1944	22.0638	4.80412
Q9NZT2	OGFR	35.0252	26.531	69.6063	32.5003	41.9808	29.2125	16.9435	31.6637	10.1887	9.28901	9.33624	7.09854	13.7041	11.2473	7.02158	0.561227	4.78068	31.7176	38.6844	5.82471	4.053	15.375	31.7208	7.62556	19.7585	6.4442	7.15046	10.8986	17.4306
P36578	RPL4	1152.46	1012.66	1837.49	1060.29	1434.63	940.281	730.999	910.493	258.435	261.784	295.142	217.426	400.981	319.727	188.774	0.283866	150.919	1059.36	494.221	252.39	153.545	630.475	1079.49	292.727	570.255	272.881	304.206	328.047	131.052
P55884	EIF3B	141.243	122.429	237.067	130.316	205.751	120.936	84.2311	142.366	39.7931	39.2955	33.3421	25.2941	43.4538	49.8915	22.4027	1.32636	19.5968	126.149	79.2737	35.9417	19.6661	82.8318	121.606	32.9283	68.8175	34.8114	43.2317	48.1399	11.441
Q14498	RBM39	161.162	147.641	254.623	150.628	196.141	129.934	116.614	140.916	45.6292	50.2877	42.6929	34.0935	56.1301	52.0733	33.9841	0.84779	22.1447	130.711	37.1098	37.5622	22.9305	67.8134	132.718	35.4235	81.0363	34.5531	39.209	57.6485	5.42348
Q9H223	EHD4	127.765	122.149	193.757	111.17	157.595	92.8826	70.3885	115.485	26.1212	24.8137	28.3623	23.6975	43.7123	33.0033	20.5488	1.04146	13.0356	119.697	107.184	26.4717	14.2198	75.0704	129.904	29.7418	65.4436	31.1721	34.0664	35.0089	29.3843
Q9Y262	EIF3L	186.054	157.858	262.594	161.212	220.371	136.319	105.094	150.492	40.8538	46.5416	40.9951	31.2332	53.3584	48.7546	31.0939	0.571237	22.9343	158.278	93.3694	39.2459	20.9159	93.0543	165.137	39.0972	85.2955	35.5041	42.4862	52.4058	21.9475
P04792	HSPB1	8519.3	7725.45	13774.2	8490.44	10994.5	6677.01	5271.46	7169.47	1706.3	2265.5	2318.3	1363.01	3012.5	2714.29	1733.2	1.12649	1003.01	8703.25	7239.37	1958.33	1305.44	5278.67	7346.41	1856.5	4002.49	1777.13	2214.18	2342.4	1229.02
Q9Y3A5	SBDS	27.8495	25.5299	45.0823	23.1166	38.0617	20.279	12.4575	24.8444	7.43497	7.57327	6.54173	5.40678	9.67038	7.14765	4.00599	1.06535	3.79449	33.1546	44.0633	6.30447	4.30405	27.145	25.0621	7.7971	13.8329	7.24403	8.4366	8.07275	9.37824
O95236	APOL3	18.7988	11.6272	36.85	17.8262	22.1703	12.889	11.8217	18.4741	5.22151	4.95129	4.53857	3.6098	8.91005	4.97239	2.17297	0.825059	3.42276	15.6759	22.5576	3.38526	2.52181	15.9924	16.2808	3.70602	9.22534	3.92555	3.58915	6.14987	6.76574
P15311	EZR	431.005	350.863	648.484	356.867	521.042	274.611	250.348	367.438	77.4686	99.5356	93.4076	70.8337	131.619	123.919	65.9676	2.62221	46.7571	411.852	324.185	97.0141	58.6779	286.831	394.143	86.9813	200.644	95.3087	105.315	137.681	61.52
P33992	MCM5	66.6205	53.0681	113.337	63.8153	91.4899	60.2272	46.6832	57.4555	18.4235	19.014	19.4827	13.0906	24.9491	20.718	11.8232	1.03247	12.2701	52.4037	21.9287	15.5778	8.46645	32.6771	56.7733	16.9361	33.7163	15.4616	16.7583	20.1267	3.33507
P52630	STAT2	45.2063	30.428	57.7297	43.6758	47.9529	32.6212	23.7722	31.1492	9.29723	9.26434	9.7242	7.7805	11.4817	11.9403	7.96934	0.704864	4.7199	32.1789	16.5121	8.84801	5.16157	17.7436	34.4358	9.44602	18.8411	8.577	9.65452	13.8415	2.39565
P49915	GMPS	47.6092	37.4973	80.609	45.9551	68.8931	46.3172	32.497	42.4013	13.5803	10.1419	11.8258	8.00009	17.2138	14.6853	9.11751	0.515973	9.0753	39.923	31.2343	10.8779	5.82938	28.0002	43.9591	11.5935	26.1217	10.5549	12.6679	15.6226	4.32156
Q9Y606	PUS1	14.2188	7.70947	17.4138	12.2375	16.528	7.79936	5.6232	15.4959	3.26202	1.82757	2.82452	2.12544	3.85733	4.54401	1.7124	1.27814	1.64132	8.29791	5.19222	3.69197	0.986143	5.65198	8.74244	2.09769	5.51245	3.27991	3.49709	3.04817	1.93516
P49368	CCT3	291.304	265.272	518.581	285.313	432.953	269.504	209.812	259.611	78.8807	77.2483	75.9716	57.9664	104.429	89.7624	51.1852	1.35541	44.6162	291.45	182.13	66.0442	39.4042	184.601	297.227	79.1798	151.622	65.2054	80.2527	100.764	45.3732
Q9P0L0	VAPA	165.747	153.504	298.744	127.072	241.367	128.041	100.528	147.286	42.1748	57.7639	38.2982	23.0548	60.2062	56.1814	21.6061	0.690688	27.2309	164.339	140.34	40.0383	23.6891	117.692	161.109	43.1793	99.1221	34.8765	45.1182	65.4078	22.9739
Q13557	CAMK2D	42.5742	21.7763	53.2521	30.8263	32.3668	14.6131	17.5406	41.0392	7.08694	10.1009	5.63849	6.3231	13.9726	10.247	5.58147	0.0961391	4.30805	25.5884	24.8305	8.83525	5.26728	15.5733	22.0964	6.79932	13.375	8.61523	8.11246	12.0222	4.13557
P63098	PPP3R1	145.61	157.108	319.212	162.882	219.334	127.61	170.184	145.782	36.974	40.1729	44.0093	28.4125	68.7922	55.7162	37.0526	1.12932	21.6897	124.911	100.508	52.4399	15.9399	106.436	140.772	31.6964	63.3052	56.5977	53.1044	88.6753	13.7234
Q9UGI8	TES	37.7829	30.345	70.2626	21.8449	49.4243	29.1952	21.7607	34.7231	13.2456	15.0917	8.21795	6.50653	18.4749	14.189	5.83046	0.800869	5.15249	60.0201	62.4236	10.8992	7.79653	49.6941	49.8071	11.3837	20.22	14.5375	13.3076	20.416	6.44364
P63208	SKP1	199.649	180.969	322.039	192.265	257.159	172.554	129.6	179.544	50.9509	46.8288	55.5281	38.3593	74.8615	57.2298	38.1316	1.61699	26.8402	190.98	106.618	45.2167	30.7205	117.519	192.025	49.5658	95.6751	46.6385	50.0771	56.6849	13.0474
P27708	CAD	24.0279	21.0259	40.8472	22.4315	33.0032	22.4643	15.1969	20.6303	7.62604	6.83791	6.99005	5.23499	8.19319	7.09351	5.4729	0.332563	4.47275	21.2748	7.77791	6.04837	3.30828	9.47913	21.2883	6.00624	13.3147	5.43008	6.50585	7.60913	0.790572
Q9UHD8	SEPTIN9	90.2521	85.542	151.022	81.3465	129.241	70.4931	58.2063	80.585	21.5981	24.4014	22.4182	17.2209	34.4621	27.8618	14.8034	0.46586	11.7192	111.978	125.315	22.2753	12.0782	95.6374	103.332	23.2299	48.0904	22.1372	22.0044	35.3837	39.1528
Q99623	PHB2	629.088	532.849	973.315	578.332	768.51	531.396	390.776	507.423	146.293	170.135	161.948	115.112	222.537	198.983	102.703	1.12934	77.4935	643.255	279.704	135.773	80.8629	350.385	600.22	142.278	311.725	136.068	151.644	202.78	63.1663
Q3ZCQ8	TIMM50	47.9648	39.8903	92.3426	49.2762	81.0372	55.4929	31.3122	38.7692	20.8314	16.3124	14.7346	9.06109	13.7408	17.0421	9.65548	1.02369	6.65062	50.5558	30.2514	9.89985	6.09343	28.1762	47.409	13.2421	29.2311	10.0136	12.5732	19.5329	10.5674
Q13838	DDX39B	718.588	574.715	1167.51	615.494	985.515	565.927	456.087	603.511	192.438	198.739	180.647	123.704	247.615	223.702	111.668	1.64233	103.082	655.346	328.424	150.58	85.1304	417.709	690.106	162.492	365.916	152.898	179.606	233.872	99.1506
P62826	RAN	1463.53	1358.46	2324.97	1436.31	2043.41	1283.91	1001.71	1267.47	352.409	392.832	370.533	248.005	516.505	485.861	247.958	0.653078	197.266	1570.38	766.837	388.715	203.844	998.175	1588.01	369.166	758.069	376.7	446.02	506.419	131.651
P46779	RPL28	598.852	500.683	958.17	530.441	802.274	501.261	381.699	526.328	146.114	138.36	153.787	116.692	204.131	170.035	96.5281	1.69685	84.4734	617.836	358.706	131.301	92.3589	428.847	621.467	165.887	319.989	140.679	157.585	183.644	53.0705
Q13630	GFUS	48.1647	40.8516	80.4513	32.0113	55.1403	31.3963	29.2733	43.1782	9.13178	12.8244	7.52009	7.41452	19.9936	14.4626	5.60341	0.850329	8.4767	58.9807	54.5361	14.2643	9.89749	49.814	57.7554	13.0942	25.765	11.8459	16.6136	16.4813	6.63342
P60228	EIF3E	106.808	86.2262	161.584	92.2226	129.543	83.8144	57.2821	88.1832	23.595	25.2433	24.1672	17.6044	34.1939	30.7893	18.1355	1.88738	13.9364	84.0972	48.063	21.5192	13.0421	47.3109	86.8007	22.0472	49.5107	22.7943	24.8096	31.5602	10.2416
P14927	UQCRB	96.2343	72.8524	153.29	88.5797	144.686	79.8746	68.0579	55.1189	38.7891	30.3618	23.3579	12.1237	28.9566	35.6645	12.9791	1.21292	11.7507	116.964	66.2563	20.6975	12.4537	70.4084	106.008	24.4491	63.7621	22.5611	21.3696	45.7032	13.0136
Q9NV31	IMP3	9.79463	9.76321	27.3325	14.9565	21.7578	15.4484	6.23973	13.2374	2.76485	4.76972	3.34769	4.65057	4.96053	4.21599	1.74221	0.586038	4.1631	14.2908	6.42328	3.802	1.26043	9.98669	13.865	5.9181	8.37616	4.3873	5.51224	3.52366	1.10813
P36969	GPX4	106.522	78.7336	134.248	52.1582	89.9005	94.2192	59.4504	77.38	19.6667	24.2441	23.9896	14.2749	35.6285	23.0915	11.268	0.589444	12.3286	78.0297	62.7347	24.5377	6.4759	65.4057	104.924	19.6128	49.6266	24.3945	26.4098	22.7285	11.9296
P39023	RPL3	553.026	465.726	848.922	451.09	652.113	426.307	329.982	421.651	135.457	121.551	128.647	96.0146	178.922	144.598	86.6943	0.917969	64.1413	522.138	309.26	116.327	71.2169	353.136	527.631	129.303	271.248	125.787	140.971	163.688	58.0436
Q14764	MVP	550.084	458.968	879.686	434.097	707.131	387.291	339.621	507.346	126.8	129.871	112.113	89.1593	217.993	171.763	78.2075	2.11286	66.4877	679.535	465.137	134.541	70.9767	459.972	657.271	133.788	281.772	148.373	152.589	186.498	129.146
P36873	PPP1CC	28.4851	22.0432	43.4167	23.638	34.23	20.4597	16.3804	21.8476	6.3317	5.47896	6.67421	5.80695	10.5522	6.68131	5.16727	2.29982	3.64341	21.8422	9.12292	5.93461	3.79042	12.6146	28.4907	6.8899	12.4214	6.39265	6.70181	7.40219	1.21737
P78417	GSTO1	331.41	297.101	559.548	276.124	475.171	260.094	220.039	321.586	86.2243	107.227	70.1118	55.2621	140.43	116.888	43.644	0.14296	42.9531	466.044	360.934	84.4231	46.4162	325.635	449.618	81.9009	184.057	89.4094	105.819	131.11	116.709
Q12874	SF3A3	59.2723	43.8767	98.6255	56.4324	85.4276	48.7586	34.7268	49.6786	18.5067	18.3477	13.5325	10.9439	16.7072	18.0571	10.8882	1.13248	8.94647	49.8134	29.6992	13.3794	5.74381	31.56	49.1459	13.0556	30.4599	13.6316	16.0814	21.6879	4.90833
O95232	LUC7L3	117.834	85.7271	188.419	108.32	149.432	86.263	69.9812	107.157	31.0329	29.5607	26.4224	21.9372	37.1431	40.7692	18.0215	1.18195	14.4272	98.0979	41.6457	28.577	11.9057	51.5488	103.687	23.7402	57.3398	29.6179	31.459	39.6317	14.8967
P27635	RPL10	884.029	694.009	1372.24	712.315	1100.1	664.572	538.294	738.166	191.312	194.353	206.166	158.933	291.867	233.172	131.868	2.20579	114.997	774.404	492.154	189	104.384	509.636	789.321	216.888	409.286	210.64	223.889	236.358	113.372
P23490	LORICRIN	983.017	1026.97	1405.87	864.424	498.167	310.543	631.055	1093.98	251.482	293.177	208.641	107.467	471.204	117.552	201.616	0.813319	91.5535	1286.78	1127.14	288.243	240.387	1039.37	864.836	380.231	392.969	205.734	371.225	169.113	419.547
P16435	POR	47.787	36.458	66.2087	36.5934	52.2921	29.1989	20.1081	42.1035	10.3388	11.089	9.13993	3.15295	14.7734	14.3957	5.38131	0.565877	4.98828	44.8426	40.4065	12.722	7.44162	33.275	40.8116	9.2097	20.97	11.9756	12.191	14.1513	6.95144
O95292	VAPB	73.7971	55.674	130.766	61.9215	110.802	56.5961	45.3437	69.5443	22.0371	22.2476	18.171	13.0117	25.8295	21.5399	10.4203	1.34575	11.0283	71.736	51.623	14.3653	10.8693	50.2141	61.1177	19.5549	39.1043	16.9466	18.3264	25.7101	9.4362
P28065	PSMB9	423.444	345.023	664.994	367.07	517.892	313.693	289.418	371.377	103.898	123.799	97.1187	81.4167	144.211	121.895	77.0284	0.416935	58.3369	409.614	227.456	83.2047	46.9702	236.139	421.483	80.3479	216.232	84.0465	99.15	140.227	57.0387
Q96FW1	OTUB1	276.453	234.932	492.078	237.89	389.235	219.904	182.421	277.893	75.9895	91.9574	64.7326	53.2536	103.821	89.2773	42.2584	1.22724	42.5546	310.553	308.819	65.1196	37.8493	251.347	269.934	63.6389	140.746	63.9654	75.5004	100.068	53.3708
P40429	RPL13A	786.169	654.296	1162.04	673.278	938.241	662.84	491.828	577.143	184.386	166.265	187.879	134.223	257.272	202.594	119.437	0.960026	96.7593	683.572	356.512	160.769	102.047	459.715	695.367	197.594	388.289	180.618	204.984	227.653	68.617
Q9BY44	EIF2A	36.7944	26.8159	65.0632	32.5908	56.5783	35.6459	19.7175	35.9527	10.5283	11.2101	8.65882	8.17886	11.8847	10.2144	7.12216	0.570039	6.03444	38.8848	43.7435	7.95359	3.76023	28.28	32.9171	9.55225	22.0529	8.14459	9.31884	12.6104	10.3973
Q9UDY2	TJP2	22.0409	17.3857	25.5284	18.1722	22.3163	9.78329	10.5514	17.4109	4.0648	3.15778	3.65057	2.95589	3.98743	5.72383	2.50318	0.863345	1.8722	12.9735	15.2099	4.46488	2.65932	8.71282	14.2281	3.03853	10.203	4.20616	4.43212	6.86536	3.82438
P61086	UBE2K	62.3485	59.0169	107.628	59.9607	88.8514	51.0708	38.1545	75.6618	15.738	15.9926	12.2944	12.322	24.7712	25.8335	10.0899	0.315877	9.87384	61.9631	44.0018	19.6038	8.12106	45.3115	64.2168	13.9174	33.7664	18.2591	20.2507	25.2117	4.72335
Q01844	EWSR1	223.043	208.944	351.513	212.401	303.207	193.874	145.184	161.162	59.3842	61.0711	56.9427	38.2432	76.6724	65.9745	32.7196	1.63931	28.0486	219.724	112.514	55.0362	30.8846	148.43	214.434	56.5774	118.755	55.8157	61.7985	74.8631	15.5089
P09132	SRP19	71.2526	65.4064	115.311	62.9823	87.9606	53.8271	43.2029	70.0253	15.3996	15.4706	16.2633	14.4252	23.9644	20.0917	11.356	1.42946	9.84279	61.2502	33.5592	15.1898	10.3993	39.3416	64.9821	16.4066	34.6765	15.7399	18.8185	20.1023	9.18951
P42766	RPL35	201.771	188.032	288.802	167.125	235.107	209.463	182.943	152.828	82.8084	33.1558	49.7497	30.5192	61.5673	50.7642	23.0543	1.15558	30.9221	210.313	100.302	42.9514	32.1955	160.357	209.377	52.3015	101.819	49.1225	60.0393	66.317	17.0654
O14980	XPO1	63.2831	49.52	110.184	60.7093	91.342	54.5448	39.886	61.1492	19.7619	21.5083	16.4934	10.1843	20.3061	24.4354	11.4364	0.910431	9.09399	59.2922	52.053	14.5235	6.48657	41.9623	53.8213	12.2252	32.7516	12.9694	15.9143	24.2084	7.74292
Q12905	ILF2	339.558	294.108	581.591	297.988	433.329	284.841	225.844	280.722	89.5037	89.2392	87.9321	60.5849	129.897	106.341	57.2058	0.232965	47.0049	304.531	156.377	73.8019	41.5199	192.278	311.204	71.0619	163.298	78.9898	91.7843	105.89	46.2234
Q04323	UBXN1	66.8206	57.7861	109.399	62.6674	96.6977	50.0498	46.3774	64.5147	14.1855	20.1445	19.8815	9.3861	24.6121	20.8373	10.1968	0.606426	8.64105	76.8527	48.4458	17.826	13.0311	57.2042	74.7858	21.4826	35.6381	13.1532	18.0144	18.7461	9.69609
Q9UHV9	PFDN2	131.508	121.059	221.509	131.24	170.332	115.291	89.3738	114.109	32.0775	35.8371	35.1105	31.9915	49.0437	39.4524	24.9852	0.164688	19.4723	125.818	71.8546	29.8934	18.2514	74.3487	127.438	37.0337	68.2133	32.2022	36.2754	42.4606	5.35149
Q9H0U4	RAB1B	102.38	67.2016	165.184	70.2262	120.877	62.2044	49.2071	110.592	23.0476	28.8178	15.6489	17.7018	36.942	30.9798	9.48943	0.614925	14.0187	107.668	148.351	30.4152	16.9788	82.5206	110.148	28.065	49.936	26.4002	33.8218	34.6233	38.4722
P63000	RAC1	147.734	139.072	268.875	137.476	219.38	118.014	103.438	159.108	42.8418	55.8004	33.6684	32.1587	57.7647	50.6589	22.6174	1.25822	22.1218	186.984	233.387	41.2955	20.558	169.287	147.04	38.1158	75.3452	36.2404	46.6398	63.2023	48.2229
P16220	CREB1	109.393	76.6433	199.469	103.87	159.532	98.2256	75.0466	92.0718	29.9429	36.2317	28.4645	27.0422	41.589	42.9602	14.9569	0.446793	18.9332	104.397	57.7924	26.9105	13.2285	69.1311	98.8963	28.8797	60.3281	21.9613	26.985	46.1365	7.58149
P62753	RPS6	1851.4	1696.7	3030.1	1680.33	2425.25	1706.62	1182.86	1549.2	433.482	465.926	488.77	354.401	621.544	523.57	304.552	0.713917	249.889	1832.7	940.909	405.934	245.496	1104.8	1815.17	479.902	976.631	462.81	497.854	576.432	264.899
Q7Z739	YTHDF3	6.4704	4.80044	9.43707	3.37094	9.05143	4.04178	3.63061	5.42468	1.86674	0.766971	1.26516	0.580835	1.38415	1.40369	0.834241	0.416608	1.10754	4.5989	3.51285	1.63671	1.32103	3.47501	5.08772	2.11407	2.90273	2.13607	1.05356	1.49733	0.690582
Q13835	PKP1	405.202	469.619	480.442	314.504	386.556	167.251	228.37	368.203	55.182	73.3212	69.2319	63.5347	100.115	99.4828	52.0189	0.493286	30.4286	350.734	314.178	131.428	65.5864	224.742	310.579	98.5948	169.273	113.511	123.048	106.396	53.7895
Q03519	TAP2	168.653	157.259	300.376	170.222	223.402	154.985	116.187	155.485	40.2488	50.2254	51.2566	38.8491	66.9282	60.6447	35.1509	0.94132	21.063	171.751	86.2424	42.7658	29.323	100.991	168.214	44.1658	85.3188	45.0768	53.1414	61.5902	2.16941
Q9Y3Z3	SAMHD1	773.121	687.099	1352.14	828.6	991.731	726.422	544.021	707.196	200.077	237.286	221.484	185.648	353.056	269.55	152.437	0.829504	101.049	751.035	300.574	183.242	118.229	458.646	799.267	194.838	406.343	176.108	207.788	287.012	43.2589
O60828	PQBP1	46.2259	34.1826	73.1468	38.5369	60.4639	32.5509	29.552	47.4295	12.8955	12.0935	11.3361	9.70412	14.9183	12.7096	8.46854	1.03695	8.16616	36.9666	24.1457	9.38655	4.78265	26.4347	41.7416	10.0358	21.6679	9.81444	10.6448	13.9645	2.81271
P62424	RPL7A	1882.2	1670.69	2939.31	1670.18	2333.87	1514.14	1201.69	1442.35	415.669	413.135	462.72	331.661	623.26	492.229	290.231	0.469604	235.082	1797.48	1000.6	413.97	262.864	1195.99	1754.85	493.302	932.505	467.838	512.258	544.114	224.133
P15531	NME1	2014.19	1712.55	3464.56	1632.51	2684.14	1486.11	1297.28	2004.06	472.15	504.237	489.672	378.218	778.152	596.082	344.488	1.1423	299.291	2107.93	1497	463.173	281.99	1388.45	2070.77	502.462	1008.05	465.878	542.998	609.928	337.354
Q16719	KYNU	16.4137	9.20283	22.4643	8.59722	12.1299	8.84872	5.91487	19.0239	4.21299	1.87901	3.15301	2.44047	7.01184	4.28273	2.26515	0.448379	2.99104	10.4831	11.3126	2.98262	1.56325	7.2572	8.65311	3.31614	7.06821	2.72905	1.43471	3.946	3.22979
O15155	BET1	42.5262	40.5818	69.9153	40.7664	54.2499	38.3459	23.8095	38.7615	7.74557	14.6683	9.25133	7.80803	12.4186	15.0342	6.97889	0.440631	4.4328	45.3162	19.7128	12.4432	5.7042	23.871	42.4564	11.8796	23.6259	16.0531	14.4287	12.5192	3.22146
P68400	CSNK2A1	182.711	152.273	331.818	191.34	266.944	152.433	142.045	179.58	52.0351	66.4641	48.816	44.4406	64.0185	57.0099	34.8542	0.9279	29.6497	169.938	93.7254	37.2175	22.8608	109.983	166.407	45.387	86.2913	41.0626	50.8264	70.9593	19.962
Q6I9Y2	THOC7	3.47288	1.57365	6.08631	1.38967	5.74692	2.75185	0.874999	1.84848	3.34061	1.69606	1.54045	0.105352	1.87944	0.956743	0.607118	0.479321	0.516405	2.60795	1.31802	0.432182	0.614615	1.65807	2.55695	0.580603	2.04459	0.911711	0.714834	1.54515	0.750791
O94992	HEXIM1	26.2411	21.1989	49.6071	23.0607	40.5686	25.2415	18.8417	28.0279	10.7519	6.82206	6.61113	5.29934	9.15092	8.95203	6.12877	0.198982	4.80278	22.5812	12.2362	6.7303	2.86619	16.3536	23.9188	6.79054	14.7734	6.88404	8.14739	11.2162	1.76163
P61163	ACTR1A	89.1077	91.2326	129.331	65.8468	111.306	63.8968	52.4167	59.3065	25.6381	27.6852	18.1864	10.9509	23.6648	24.8763	11.4477	0.415057	9.33412	111.896	120.001	22.8404	12.3087	83.6834	98.7843	23.5273	46.9972	24.0603	26.5127	31.9163	35.0369
P43034	PAFAH1B1	74.1805	74.8195	113.685	61.9665	97.1142	49.5903	47.7325	74.5029	18.3382	21.2115	15.2797	12.9518	24.9564	25.2365	11.0732	0.57721	9.60705	98.2412	99.1375	24.1961	12.0431	86.342	77.6269	19.7076	38.0331	23.7206	28.8494	27.122	9.89602
Q9Y2B0	CNPY2	103.321	77.9891	163.469	90.7036	128.334	75.2934	62.5976	95.3684	26.1957	16.5783	23.5028	19.341	32.3079	25.3033	14.7086	0.643939	16.1751	82.4852	48.5978	20.0846	14.4878	56.3906	83.2636	27.8755	51.8724	28.4465	29.3837	27.9244	11.0272
Q92572	AP3S1	39.6491	31.6872	81.7286	37.3826	68.2837	33.3674	21.8962	43.7555	13.1985	13.4803	10.3665	8.66086	13.9856	15.7465	7.46739	0.683039	5.10134	48.6597	45.0086	10.6914	6.74853	34.7417	43.3962	10.9151	22.0937	9.93443	13.5446	19.329	9.00764
O60884	DNAJA2	28.1206	15.0532	49.344	17.1867	34.1435	17.5596	11.8812	26.4067	9.64014	7.07225	5.80111	4.40993	10.4062	8.74322	3.67267	1.20632	4.59094	22.0106	24.5048	5.28989	3.38318	18.2439	23.3427	6.19061	12.4199	4.13461	6.70094	9.08797	4.67618
P20674	COX5A	247.449	211.27	412.691	254.656	317.174	195.612	168.783	203.379	64.2375	66.8552	61.4938	45.0829	91.0855	89.2249	41.9266	1.12349	34.5919	301.434	111.909	63.8383	36.2959	167.802	259.492	65.9129	138.724	61.949	70.9081	91.4071	18.5762
P39019	RPS19	456.28	383.494	808.291	408.774	637.838	379.615	299.875	433.65	119.261	120.729	114.898	88.4485	172.546	128.126	75.9599	1.78953	68.3086	460.38	254.28	108.321	64.4221	304.512	459.927	126.271	233.077	113.159	125.049	143.661	67.9161
Q8N3F8	MICALL1	11.6262	5.90867	16.8549	6.73183	15.4088	5.38233	5.18156	11.8986	2.45359	2.08466	2.221	1.99561	3.42443	2.15412	1.96561	1.37323	1.7076	8.81207	8.30134	1.98522	1.53883	7.10954	8.30229	2.79128	4.619	2.21454	1.4295	3.18246	2.5401
P62269	RPS18	1637.67	1303.24	2549.88	1351.6	1887.29	1217.82	966.945	1318.02	378.149	352.26	377.575	287.299	580.708	460.862	244.571	0.721215	206.927	1614.22	916.445	346.979	222.873	998.594	1582.99	414.402	787.058	381.123	411.052	472.799	177.847
P46781	RPS9	1448.64	1207.33	2251.54	1216.94	1820.65	1085.59	853.757	1266.07	322.567	333.31	347.171	236.273	485.317	422.748	219.535	1.8138	195.062	1307.82	747.632	317.955	181.166	879.352	1330.6	344.063	669.442	346.821	365.004	424.604	203.7
Q6XQN6	NAPRT	196.108	147.9	232.574	157.448	182.048	118.393	102.867	138.581	38.4599	39.1303	38.2849	25.2919	55.2271	44.1454	26.2028	1.22563	18.6856	167.763	103.89	44.6229	19.2709	91.425	192.127	45.5512	95.5477	45.7016	38.1916	51.7597	17.7884
Q08257	CRYZ	69.5632	78.1912	127.996	74.1763	110.638	61.3419	48.9836	68.4352	17.4194	17.5002	18.0244	15.264	29.5944	21.0523	13.0605	1.30208	10.9573	106.062	127.525	24.2452	13.9663	92.0434	91.5301	25.9138	43.9156	25.7284	29.9629	25.443	26.2888
P62701	RPS4X	800.99	652.014	1102.43	662.534	912.225	581.684	480.545	588.174	166.084	168.503	173.066	121.421	233.505	192.331	118.24	0.894571	91.9765	678.699	442.19	157.803	101.303	460.729	680.279	175.359	367.789	164.702	182.665	219.439	113.478
P30040	ERP29	669.233	541.777	1054.73	537.897	860.906	484.494	411.08	609.911	148.586	160.002	141.877	122.648	231.02	184.351	113.051	0.373539	78.5132	649.27	401.712	134.617	77.4383	393.835	673.531	146.15	348.766	144.528	158.328	213.522	173.884
Q6UW68	TMEM205	22.0682	23.9385	49.611	15.6953	44.2824	16.1971	23.1776	11.7107	11.8965	18.3631	4.79039	2.96821	5.01404	10.1136	3.64941	0.511061	2.74365	26.2301	31.9631	8.29511	2.98192	24.6234	19.1944	4.06376	16.1824	7.84142	9.01033	18.9817	10.9445
P06493	CDK1	113.77	96.3033	188.623	79.6481	131.062	84.413	59.0165	93.2748	31.7432	28.401	26.4426	16.9683	44.3905	28.7549	15.1522	0.837994	19.4552	92.6767	50.5854	21.593	12.0017	58.7312	102.205	28.7347	53.134	25.3271	24.9832	27.0577	20.99
Q02878	RPL6	1560.52	1271.44	2340.91	1380.72	1850.65	1230.73	954.531	1245.79	365.097	316.562	369.888	271.374	533.102	378.555	251.696	1.10464	182.468	1329.51	763.401	319.944	194.263	841.894	1379.58	361.488	723.232	356.618	403.563	397.787	242.481
P60602	ROMO1	67.0458	70.8509	144.146	82.6791	114.528	79.0201	59.9288	70.5771	28.2062	19.2341	24.7422	21.7595	20.6397	24.0086	18.1531	0.563592	6.28224	83.4879	31.0441	21.0736	13.8655	48.8405	68.1424	25.2631	38.8569	21.5419	26.347	31.5236	5.04096
O00232	PSMD12	118.532	90.2881	178.241	98.6372	136.366	86.0553	67.2968	100.952	28.7314	25.1212	24.0552	20.3691	35.4633	30.4773	18.0821	0.954139	13.6431	91.6903	77.4084	23.4238	13.6101	59.7619	94.7955	23.8546	57.2838	21.9977	25.3327	35.3371	20.9673
Q8WVM8	SCFD1	23.2812	19.2786	38.9241	17.2537	34.1042	15.5171	12.6406	21.5918	6.95943	6.75605	4.96253	3.43892	7.43472	8.00916	2.70424	0.60318	3.90794	19.7926	14.948	5.26554	3.45637	13.3012	21.1118	4.972	10.8623	4.68633	5.96179	8.44535	3.25769
Q5VTE0	EEF1A1P5	6270.31	5758.31	9958.19	5343.31	8166.1	5059.62	4152.1	5271.97	1408.39	1575.94	1532.72	1053.46	2151.79	1734.87	1095.68	0.118663	793.877	6542.24	4152.78	1462.28	883.565	4117.8	6307.3	1550.21	3036.24	1478.35	1747.33	1875.6	955.115
Q9UKV3	ACIN1	40.527	30.004	57.4298	35.0386	43.3382	29.8198	23.1568	29.578	9.75303	8.94441	8.67568	6.4653	11.9603	11.1812	6.04358	0.798377	5.31751	28.2262	16.5363	7.56921	3.30861	17.5801	30.7285	7.49187	18.812	7.66933	8.02434	11.8836	4.67584
Q86V81	ALYREF	281.592	234.882	463.161	294.882	373.178	252.627	192.559	214.75	76.3106	87.2951	83.9323	63.7622	96.1558	88.0177	52.0271	0.644223	36.5279	251.684	107.327	66.7001	38.7028	154.871	250.888	71.4126	141.949	68.2745	75.0779	88.0377	16.0017
Q92499	DDX1	70.3519	57.0535	110.742	64.2133	90.1036	58.6245	44.1812	54.0379	19.0812	17.4439	18.3025	13.0731	23.3091	22.5954	11.9423	0.856948	8.5311	60.7629	32.6262	14.4104	9.11405	36.7954	62.1503	15.4209	33.6311	14.49	18.1167	21.7114	6.07763
P50750	CDK9	12.9362	8.91316	21.0337	8.70844	19.1868	10.4987	7.50005	10.3932	5.22062	3.62223	2.8784	2.58205	4.41911	3.76337	1.18915	1.08821	3.21936	9.87472	3.89865	2.46614	1.3225	6.28071	11.5043	2.79277	7.83902	2.59103	2.39282	4.29312	1.23564
P09651	HNRNPA1	2328.35	1930.34	3504.74	1960.96	2942.9	1779.72	1489.17	1843.49	527.27	550.537	528.871	360.149	736.227	598.86	383.272	1.23613	295.049	2014.66	1179.1	508.116	279.57	1255.82	2193.14	544.009	1119.8	522.925	601.73	632.186	411.568
P41226	UBA7	43.4618	32.8086	56.7029	37.5106	47.3837	29.1332	23.993	33.0014	8.79958	11.6052	10.4453	7.25125	13.055	11.979	8.43999	0.325082	5.25671	34.6987	16.0083	8.09619	4.69985	17.6229	33.761	8.09224	19.8965	6.55207	8.20049	11.598	4.23736
P43686	PSMC4	109.826	77.8416	161.168	81.7446	124.245	72.301	60.9337	87.911	25.8266	26.5244	22.4693	16.5424	33.6054	27.0097	15.6764	0.702364	13.4233	81.8025	52.4114	25.0035	12.5704	48.6947	85.3766	24.2525	47.6608	22.8403	24.2764	29.0533	11.6039
P61221	ABCE1	35.3201	28.7893	58.9527	26.4197	42.7202	30.3712	20.1031	30.8017	10.4246	7.4656	8.18921	5.26432	11.5597	9.53586	4.8315	1.46089	5.18028	35.4749	28.0898	7.91586	4.67073	25.0475	30.9762	10.5163	18.1202	6.66275	9.64343	10.5255	3.10272
P02533	KRT14	29582.2	37399	45256.3	26339.3	38192.3	16666	20243.3	32410.6	6528.94	5899.35	6160.14	5015.64	9347.82	7730.97	5103.24	3.79169	2341.2	30638.3	24104.4	10458.9	4744.6	17236.4	30229.7	8225.39	13087.1	10900.6	9611.01	9206.76	7525.08
Q15185	PTGES3	131.892	88.1791	179.138	101.365	142.828	89.2323	72.2905	101.595	27.7381	28.3367	27.3601	16.7802	39.6361	34.128	17.4428	1.20839	14.3909	113.267	70.9151	24.7096	16.3012	72.3218	119.032	28.124	62.7745	23.1098	25.5429	37.3304	22.2547
P68371	TUBB4B	793.699	835.07	1308.78	710.511	1147.31	582.996	493.01	786.954	218.979	235.926	175.198	133.961	245.141	288.45	116.634	0.946829	90.7542	1000.65	1039.27	245.554	116.983	739.57	828.888	216.406	425.556	247.018	282.735	296.515	185.117
Q13404	UBE2V1	171.086	170.515	299.549	162.015	250.762	150.301	124.127	154.762	50.3145	54.3683	44.796	30.9016	69.418	56.6374	28.9393	0.153147	23.127	227.72	179.07	51.3992	29.3689	172.629	210.624	46.8062	97.5105	48.2116	60.7172	65.5608	19.1187
Q13155	AIMP2	32.8091	25.5557	50.0445	22.7456	44.0143	27.1345	18.3123	25.6535	9.31051	9.45317	7.21197	3.32924	9.58492	9.1874	3.96297	1.52826	3.31194	26.8422	30.4233	6.86326	4.28641	21.9931	24.5023	7.93916	18.4838	6.33255	8.39922	11.9648	3.52424
O43242	PSMD3	119.359	116.569	171.638	110.416	151.709	97.7709	72.9185	90.8422	23.1919	32.7311	26.7671	18.0347	37.6089	33.1543	16.8006	0.798992	15.7888	110.671	66.8207	30.2362	15.4103	65.9975	109.281	28.5915	55.0795	28.3938	33.6564	33.3796	14.8019
P62277	RPS13	1016.02	812.027	1462.84	912.153	1235.69	763.516	615.086	828.367	231.132	217.373	235.639	175.278	315.749	271.683	162.899	0.216096	119.49	915.494	478.094	233.875	128.849	596.399	961.317	240.769	466.28	240.509	271.447	295.654	115.585
P17480	UBTF	48.3861	41.7578	82.2201	48.1892	65.5379	53.3324	32.1567	38.623	17.9583	14.0456	15.8411	9.88563	18.8484	16.6012	7.52202	0.0400614	5.69994	42.5988	29.8915	10.8826	7.17415	27.185	44.2159	11.9237	23.4805	9.32814	12.9835	17.6348	3.62211
Q9Y624	F11R	78.9137	62.5801	110.52	68.8742	84.7676	57.3344	49.9948	52.8031	16.014	19.1622	18.9275	10.7482	24.0494	21.1488	15.6857	0.657343	8.06318	72.4772	33.9734	17.415	12.2398	38.7232	77.4834	17.1135	36.9087	16.0323	18.2264	22.1034	6.60812
P26640	VARS1	110.318	74.6168	153.483	91.1293	137.479	64.6851	57.2763	110.825	21.9917	26.6539	18.5097	16.5433	27.6424	35.115	12.798	0.884034	11.9053	93.759	73.2607	25.677	12.1442	68.0543	80.979	23.3875	52.6837	26.4243	27.9717	39.7487	18.909
P60866	RPS20	719.461	781.885	1089.12	616.538	1037.04	636.059	521.616	589.5	120.279	193.749	154.74	100.89	246.597	221.763	101.449	0.635213	104.048	900.524	798.818	211.65	125.437	731.936	847.476	240.091	424.268	222.436	237.704	244.586	166.988
Q15738	NSDHL	39.7541	22.154	45.0699	31.7384	37.8924	20.923	22.827	29.9692	5.56705	5.63523	5.27059	6.2474	9.20839	8.816	4.21921	1.0861	4.15142	32.0642	35.0301	7.65227	5.34447	26.4825	38.7765	7.33126	23.2302	7.5093	7.67804	12.6812	10.7996
P16949	STMN1	183.619	165.36	340.235	178.896	299.064	192.651	141.752	154.007	63.2241	70.843	49.4275	31.9589	62.9206	61.7957	34.5612	0.466467	33.3755	177.675	120.701	54.5582	22.6236	122.945	177.193	58.3896	122.408	52.3157	58.971	79.1612	5.49753
O43809	NUDT21	141.716	124.272	203.854	140.692	167.183	117.969	88.2365	106.286	34.6151	40.1876	37.8188	26.7971	42.8978	44.6501	25.8278	3.15629	17.9453	115.544	41.6297	34.8665	16.2927	65.2786	124.804	30.2996	62.9283	34.8246	40.4521	45.2047	3.63338
Q9BPW8	NIPSNAP1	28.142	25.1932	63.3662	28.0959	48.2537	30.5606	23.0826	38.4005	10.3501	6.42359	8.38528	6.22043	14.6085	12.3816	7.25713	0.648474	5.93494	28.5209	16.9318	7.5441	4.86534	17.5735	31.4978	6.92022	17.2756	7.76071	9.52106	13.4792	4.69777
P40763	STAT3	232.194	195.784	374.958	209.1	294.63	168.8	131.279	214.676	50.8809	57.2906	52.411	41.3371	81.4662	74.1613	35.826	1.46409	28.032	205.694	146.531	58.1344	31.6334	123.131	201.214	47.7959	107.68	53.5169	65.209	74.9231	29.9579
Q6P2Q9	PRPF8	30.2325	27.8744	50.8544	29.1968	43.0592	24.8416	23.5605	23.8093	10.2612	10.2707	8.90046	5.62615	9.20347	9.62369	5.93822	0.485533	4.62094	24.2334	12.9283	6.47648	4.21545	15.2201	26.0346	7.2856	16.9637	5.95184	7.53566	11.252	1.66131
E9PAV3	NACA	118.166	105.445	182.179	104.572	150.494	90.2849	75.7145	104.724	25.272	26.7633	29.0981	21.4294	39.5338	30.6228	19.4745	3.11652	16.8422	104.978	58.4832	26.8428	16.4696	71.9472	112.612	31.6185	58.4331	27.6836	31.4345	31.7461	9.36102
Q63HN8	RNF213	34.4979	26.5169	58.3258	34.2688	45.7152	27.8977	21.4541	34.0859	7.7949	9.32281	9.62955	7.97853	13.279	10.8885	7.43588	0.634463	5.29462	30.3294	15.1269	6.88865	4.51442	18.2841	31.4875	7.54834	16.2929	7.02243	7.81604	10.5869	4.52624
Q9BSD7	NTPCR	44.6084	32.3426	56.542	39.2433	41.4937	29.9216	22.2233	33.1024	9.88799	6.78098	11.7509	7.89377	12.9193	9.9632	7.79565	0.263791	5.07401	38.4464	18.3464	8.44301	5.31937	22.7971	37.5075	10.3367	18.9301	9.36805	9.84428	9.6706	3.01957
Q8NEJ9	NGDN	4.18287	4.20871	8.81637	4.52628	7.72102	6.40798	2.57565	3.16202	3.09427	1.45252	1.15504	0.517883	2.08947	1.37772	0.988284	0.0840145	1.83157	4.06936	1.81284	1.24475	1.07833	3.08909	5.24037	2.03452	3.36201	1.21341	1.20328	1.92447	0.0562887
Q9NRX1	PNO1	54.8878	47.0574	87.3407	59.698	75.5269	50.5413	31.4005	55.158	12.2869	14.4559	14.3075	10.1483	16.9524	20.3462	9.10358	1.12485	8.5363	48.054	24.5496	16.7597	7.04862	30.7781	48.3015	14.011	27.7008	17.7925	17.3209	15.7751	2.75287
O00303	EIF3F	243.613	217.69	445.196	211.371	352.399	196.656	151.338	244.378	61.0188	54.6829	61.4945	45.9549	96.0195	76.2769	41.9288	9.17874	35.6293	275.698	309.503	58.1555	33.1588	196.482	272.36	61.0072	117.691	59.4501	76.5226	69.3069	100.902
Q9NUQ8	ABCF3	21.1019	24.6264	39.4193	31.3002	36.0577	28.6038	22.5283	19.3046	5.95453	6.34967	5.75367	6.51958	7.56185	7.24524	4.91682	1.1237	2.71069	38.7495	38.0726	7.07821	4.99165	37.5595	25.5884	13.1328	13.0302	7.78028	11.2892	8.83656	5.81855
P07686	HEXB	53.2456	45.3402	85.451	35.8129	34.1218	11.4914	23.7787	83.2716	10.867	19.3768	8.65373	8.48761	26.2556	10.3405	11.7058	1.81066	5.95532	57.1433	65.4625	17.4971	11.663	35.4663	38.0173	15.0871	23.1806	13.3524	15.6882	12.804	50.6163
P40306	PSMB10	287.433	216.115	436.14	267.673	318.116	225.524	177.934	225.078	71.8523	75.7934	71.0821	54.6724	92.3233	85.809	51.3541	1.39191	26.8518	242.68	93.3129	57.5584	34.4474	128.651	231.003	52.2529	124.219	56.0204	64.3373	91.0647	49.1562
P41567	EIF1	211.568	182.984	358.684	185.523	280.125	193.482	134.805	215.185	58.7632	45.966	52.249	41.0563	76.7516	58.5618	40.7674	0.464072	27.6942	198.596	146.613	46.9845	25.8248	121.791	191.343	48.5333	106.871	44.8739	56.0295	68.1786	48.6844
O60716	CTNND1	83.3517	55.7807	140.337	70.7682	109.945	56.4333	45.4502	70.2535	21.7934	24.5889	18.3663	11.098	26.775	26.4694	12.2559	0.700096	11.9694	73.6935	53.6916	17.3198	10.7492	46.4493	68.4779	18.8	40.5132	14.7415	20.0097	27.2656	18.5098
P27348	YWHAQ	1035.96	822.863	1668.22	895.035	1336.46	773.193	635.627	894.564	250.5	274.053	231.382	175.34	343.502	308.843	164.343	0.989452	122.983	1080.2	1110.72	220.284	115.746	722.841	1013.32	227.754	540.893	213.381	250.375	339.797	410.099
Q14974	KPNB1	194.312	179.068	323.978	192.896	256.877	173.05	135.274	162.574	51.1311	54.5409	51.6626	39.4234	67.9807	65.1685	36.6377	0.649266	25.8306	197.816	90.0719	50.3869	27.4462	113.082	191.806	49.4318	101.803	46.4672	54.5619	72.5238	13.7675
P36776	LONP1	30.6532	26.4723	35.3102	24.0854	28.265	17.6527	17.5583	19.6868	4.83623	6.85267	6.00248	4.85646	7.39138	7.4626	5.63275	1.04283	3.02255	24.2663	11.6703	6.99622	3.17836	10.5718	30.4336	5.52267	14.71	4.78057	5.86999	8.00467	3.59204
Q5R3K3	CALHM6	7.73247	6.44669	18.7612	9.33636	12.3726	8.89793	7.17719	12.5209	4.17468	4.14289	2.48929	3.79726	5.43876	4.3859	2.56282	0.535869	2.14242	8.72008	2.49848	1.97205	1.46017	4.54238	10.9574	1.69771	4.44088	1.18784	2.88457	4.03308	0.210089
Q13151	HNRNPA0	483.369	427.701	780.195	485.543	652.457	452.006	334.683	355.193	142.365	150.189	138.189	96.5543	160.225	156.042	90.7747	3.12926	61.1088	428.522	184.253	115.213	64.4781	262.68	433.443	122.304	251.185	111.642	138.915	164.526	26.8138
O43676	NDUFB3	68.5424	45.6193	113.099	52.7196	81.209	62.2439	41.6263	64.394	15.2073	16.9136	17.5882	11.9364	28.5168	24.9007	9.70031	0.481652	9.89699	56.3883	41.764	13.2082	8.61738	39.6942	50.5187	12.0802	35.7825	11.9088	15.4991	24.6179	9.19322
Q30154	HLA-DRB5	439.506	353.857	691.658	381.397	486.923	365.204	308.575	331.976	106.342	150.295	115.663	70.5086	168.817	168.674	70.1628	1.22063	55.0804	447.144	177.342	97.7707	61.2994	272.937	436.293	89.7901	215.271	83.5826	112.114	179.942	20.5928
O43678	NDUFA2	79.2653	54.9284	118.395	75.6066	91.6389	66.6512	47.7344	55.151	18.9237	24.8114	20.1721	12.2538	22.8319	24.4298	14.6485	0.0653903	9.71489	70.7221	40.3924	13.4113	9.82917	43.0634	58.3863	17.2873	39.3801	15.2487	16.8653	26.0436	7.68015
Q5TDH0	DDI2	6.43747	3.24137	11.4146	4.23623	9.10182	5.02518	3.8001	4.91481	2.34253	1.91404	1.11418	1.09221	2.18499	2.90403	0.806069	0.942083	1.3657	3.8124	2.65932	0.930235	1.07689	2.14715	5.41953	1.65386	3.25266	0.491688	0.712934	3.25433	1.20873
O15305	PMM2	39.8049	38.7247	75.1235	31.4055	53.2212	32.9542	23.9412	45.5682	11.2955	11.9274	10.8939	8.06091	18.7716	13.3493	7.87116	1.57809	7.85315	41.3162	19.062	9.28134	6.11982	26.4041	40.8085	9.10968	20.0116	9.66378	9.79521	11.9734	3.79567
Q5SY68	S100A7L2	156.183	80.3812	210.479	73.5586	139.537	92.0028	24.8559	196.463	63.2259	13.3957	35.946	30.8844	76.7396	83.7178	34.3849	1.02719	36.171	118.245	155.986	23.9312	17.0769	103.148	134.818	25.4049	86.1026	39.4842	22.2492	79.1972	16.8276
P62308	SNRPG	610.658	511.368	1008.06	515.362	849.703	463.923	422.13	509.473	174.134	192.059	165.66	111.718	201.461	184.14	83.9717	0.987248	85.1737	637.836	399.046	142.001	68.1087	424.022	632.198	158.467	320.254	143.485	158.121	202.318	88.8226
P36957	DLST	204.231	150.763	256.475	164.612	202.591	135.112	115.048	135.918	38.1804	54.3635	41.5489	27.1379	57.3698	53.9164	23.6313	1.99887	22.6385	164.68	147.679	40.5248	18.3645	124.299	171.211	38.3122	86.9523	38.3533	41.5445	55.6849	25.1202
Q9UKS6	PACSIN3	30.3245	23.0222	33.5758	22.9222	29.4154	20.1447	15.1631	18.0397	4.56348	3.29667	8.82699	4.49345	7.27328	6.22538	6.09709	0.580373	2.93773	27.1259	13.015	5.29277	4.90522	16.0012	22.4677	7.01939	12.8279	6.53069	6.79171	5.28284	1.82181
P21796	VDAC1	948.352	782.478	1616.37	879.566	1363.92	764.797	583.86	908.276	243.479	284.932	230.115	141.003	346.233	349.715	151.307	0.298774	120.171	1047.56	953.115	231.915	112.039	582.574	1005.51	203.253	510.469	217.049	244.159	340.22	384.758
O43175	PHGDH	249.94	190.663	361.023	245.494	306.522	161.897	138.04	253.45	53.2308	47.9793	50.2707	35.3376	74.4563	90.5586	33.6074	2.17927	30.7457	188.71	118.037	76.8167	29.1731	130.991	190.08	53.1248	111.829	69.8463	70.3416	70.3822	32.6886
P19367	HK1	107.244	97.1523	156.427	93.2287	127.741	81.2534	65.8323	91.1596	25.279	25.5147	26.4821	16.9475	39.4316	31.1201	17.1174	0.425406	12.0611	116.19	96.4328	25.5726	14.9894	84.3129	103.068	26.4771	51.7765	25.0117	29.5206	33.5048	10.3782
P35637	FUS	147.48	133.531	213.034	121.253	179.7	129.443	89.1355	89.0178	42.6884	36.1447	33.2532	25.578	43.6042	34.6525	25.4458	0.806904	13.8228	103.68	62.4909	32.8605	15.0125	59.8047	120.026	35.5171	83.733	37.325	39.5323	40.9372	16.5314
Q3MHD2	LSM12	88.5958	53.5952	118.108	67.5298	84.5041	64.4649	44.8968	66.8766	12.2202	17.6963	18.7091	12.0431	27.9445	22.219	12.2192	0.82227	14.0187	72.8822	64.8417	14.2247	8.62511	57.8308	62.6893	20.9956	41.6376	12.7745	16.3975	27.0508	13.5231
Q9NVS9	PNPO	28.4873	24.519	51.9366	24.4995	42.8998	24.6028	19.8882	28.5859	9.11168	10.5926	8.49844	5.63787	11.4921	9.76545	6.27858	1.03913	5.31214	25.7563	12.0409	6.17576	3.68126	15.2792	24.2911	6.36181	14.174	5.5515	6.69847	10.804	2.06924
P30050	RPL12	1059.54	902.066	1635.03	881.268	1374.83	830.632	679.571	860.885	259.979	251.359	255.063	193.058	336.872	273.811	183.493	2.28878	125.39	948.696	582.941	219.148	138.134	642.607	999.664	261.419	499.79	234.25	275.698	309.441	173.217
P10606	COX5B	558.398	479.018	931.179	510.02	710.508	448.164	362.902	449.395	130.554	162.805	150.37	104.543	209.944	185.336	93.6721	1.38408	70.5531	604.477	343.409	118.828	82.0421	383.921	555.492	142.675	263.921	122.963	145.162	189.038	65.1086
O43684	BUB3	230.165	209.5	357.697	211.331	287.62	191.724	147.203	167.681	66.2042	58.5134	61.673	38.6381	84.4718	71.1707	38.4706	1.98617	31.5145	228.161	99.2494	50.5023	31.667	142.606	230.551	58.49	116.038	53.3745	60.8866	67.9874	17.7629
P13073	COX4I1	328.922	317.424	593.465	288.992	451.205	273.021	220.8	290.086	87.973	113.006	81.0685	54.145	137.277	124.025	51.4999	0.895643	48.37	443.437	307.514	83.359	50.5211	295.57	369.385	82.3601	182.454	82.3851	98.0723	134.709	57.1395
Q9H1C4	UNC93B1	0.0933715	0.55152	0.991928	0.417733	0.204967	0.672053	0.300183	0.642969	0.0615709	0.184131	0.629925	0.75269	0.0726735	0.544825	0.240538	0.852948	0.221432	0.205257	0.430217	0.0520724	0.118218	0.0856805	0.114441	0.769965	0.308847	0.103829	0.954972	0.962062	0.833016
P35222	CTNNB1	57.6755	55.822	83.7325	43.2451	63.5059	30.946	30.4926	41.5974	13.1604	14.8383	9.29053	7.35741	14.8652	17.9335	6.1636	0.904559	5.73951	47.8566	40.0403	17.2965	7.60772	28.4494	44.8897	11.7865	25.6754	12.6327	15.6355	18.5548	7.02342
Q9NTZ6	RBM12	54.3689	47.3322	99.8507	53.4038	80.1278	46.3528	38.6044	46.2966	15.6905	19.8512	17.7141	13.6519	22.543	21.0341	8.67637	0.893654	10.1101	54.8327	22.7941	14.8873	8.80785	33.7682	51.6472	16.854	25.7741	11.159	16.2013	17.5709	1.0164
Q15008	PSMD6	117.386	85.0423	180.602	110.412	155.464	77.3848	59.8069	114.808	27.5943	33.0029	23.5544	18.7134	37.1	40.1846	17.6238	0.314412	15.195	101.838	67.8429	30.9442	15.3127	71.4519	102.697	23.6308	52.8598	29.0223	35.4525	38.8536	14.956
Q13547	HDAC1	88.373	81.1069	155.304	86.3316	130.533	79.0016	56.9906	76.2171	28.8403	25.5056	23.7534	14.5887	31.2709	28.7265	14.8413	0.560321	11.9601	89.3715	65.678	21.1868	11.0306	63.1493	82.2703	22.503	46.6597	21.986	24.7582	33.6481	12.9056
O75608	LYPLA1	69.4488	77.9619	118.514	71.4329	91.0112	49.1258	44.1644	65.1538	17.5474	21.2682	18.9536	11.8021	29.7008	19.9926	12.1197	1.02328	8.62469	106.69	104.31	24.2353	13.6744	75.1231	95.2585	27.8968	37.5719	24.6664	24.8564	26.5513	14.4635
Q8TCB0	IFI44	39.4267	32.5199	53.6089	39.665	43.8108	32.5	19.9303	34.6594	6.79614	6.76943	10.1464	7.80176	13.5488	10.8451	10.0294	0.939922	3.2346	31.2432	20.2539	6.14424	5.80009	16.5169	27.7197	8.07486	18.2776	6.57427	8.12438	11.207	6.08815
Q07157	TJP1	13.6904	5.78716	18.0603	8.04027	13.6336	6.07837	5.78167	9.60049	2.77032	2.20786	2.0961	1.55985	3.53459	3.84647	1.47274	1.05086	1.99119	10.9185	17.1526	2.46988	2.18578	9.69625	8.96737	3.13621	5.60978	2.72372	3.09508	4.23468	2.55651
P18124	RPL7	985.284	905.326	1537.66	870.706	1307.84	800.336	672.312	738.379	226.322	249.846	250.316	175.946	309.134	293.973	148.81	0.708015	116.071	934.202	568.867	209.813	145.29	688.634	938.852	254.046	529.518	235.001	264.788	322.627	133.522
Q15836	VAMP3	412.512	340.266	692.298	387.152	565.945	314.233	262.584	423.106	101.343	119.695	96.8491	82.8716	137.187	118.521	77.859	1.23633	49.8686	510.585	573.545	104.982	57.3678	396.895	441.777	119.799	205.781	110.497	132.607	137.598	164.031
P05120	SERPINB2	142.286	139.835	173.135	100.037	139.998	49.9642	80.0025	134.344	20.32	25.5369	22.0588	21.0967	41.4795	27.7585	21.1083	1.26486	9.23512	150.693	164.419	54.137	25.0272	82.8698	154.299	36.1658	62.0982	48.51	40.9703	42.8809	57.987
Q14152	EIF3A	87.1395	77.8335	121.32	68.6333	101.503	59.4821	49.3169	61.2608	20.1008	19.896	17.582	13.0071	22.5086	21.9896	14.3998	1.89147	9.20645	72.9659	44.9973	17.3257	10.7152	42.9034	72.6771	19.0657	40.8494	19.3266	20.7717	27.1577	8.98003
P52815	MRPL12	81.1059	60.7927	131.202	77.0966	98.708	78.4982	43.4122	56.5415	24.0086	19.0144	24.3255	14.3135	28.7737	27.2281	11.228	2.34066	11.383	76.0319	53.2349	17.2021	10.9977	45.2323	61.8646	19.5066	38.7487	15.7418	19.0882	23.3675	5.63048
Q9NSE4	IARS2	23.5458	18.8768	39.1698	21.2846	32.2606	16.8083	15.2834	18.594	5.97896	7.59983	5.9782	3.60761	8.60424	8.0071	4.37427	0.434465	3.23435	29.9087	30.7083	6.71451	3.14378	20.5249	21.7494	5.03966	12.1896	5.54052	6.68463	9.40284	4.24482
O60841	EIF5B	35.1131	28.5089	57.6313	31.7454	48.9947	30.0976	19.0943	31.2063	9.16992	7.99495	8.84328	5.97772	11.2632	8.82202	6.77561	1.17994	5.29205	29.0769	20.4896	6.96289	4.17776	20.4148	32.3992	8.80822	17.4771	7.16448	9.28008	10.2995	6.55916
P29466	CASP1	52.0355	41.7514	96.4438	50.4594	70.895	37.916	34.3443	55.8195	16.4717	14.8624	14.4905	11.0076	21.5025	20.2881	8.19301	1.91827	7.77154	42.1491	25.4585	10.4603	8.55367	26.3276	49.3517	9.99077	26.7896	9.78955	12.8427	20.6692	6.61076
Q96IX5	ATP5MK	484.864	422.919	956.3	463.183	747.36	449.837	337.087	531.936	156.15	151.415	134.258	100.221	221.578	182.364	76.7502	1.44307	75.0868	632.965	576.46	126.851	65.7708	522.208	536.684	148.248	273.841	130.497	156.536	204.139	123.904
Q07955	SRSF1	867.458	696.718	1392.55	808.309	1082.03	674.564	574.209	719.896	236.387	229.004	229.499	178.886	318.389	250.457	139.092	1.11644	114.456	738.968	358.564	194.947	113.041	451.966	774.997	198.727	404.918	185.238	227.075	260.314	97.9751
P22061	PCMT1	162.102	141.287	246.817	126.208	212.956	104.629	93.3288	155.144	38.0906	43.8607	36.3153	26.7057	61.5153	54.3719	26.0227	0.977179	19.8761	181.727	145.259	41.0677	20.7319	123.257	192.537	38.0364	80.1687	40.9745	44.61	56.3535	28.4855
Q9Y3B4	SF3B6	117.781	103.081	179.766	111.108	129.943	102.837	74.9647	84.5414	34.303	32.743	31.1775	18.3508	42.0119	32.4024	21.411	0.32484	17.2107	102.545	47.3688	25.5253	15.6133	62.4776	92.9077	27.0715	56.5106	25.7254	32.5846	34.3432	4.62769
Q9UI30	TRMT112	105.122	101.005	152.526	89.2189	125.786	76.1332	62.804	86.597	27.3633	30.3244	23.8913	18.6504	29.2716	24.1461	20.6336	1.16797	14.9691	94.2239	61.2296	23.3568	10.7032	59.1038	104.623	24.2653	49.5286	21.4647	23.5726	32.0392	12.6669
P04179	SOD2	1095.8	939.983	1892.67	1079.91	1396.43	929.984	648.982	1001.75	315.115	396.238	276.969	204.532	529.833	443.29	160.027	0.461671	159.797	1865.79	1511.16	310.697	177.697	1299.56	1566.66	295.874	581.891	321.149	348.781	511.013	436.119
Q9P265	DIP2B	4.76927	1.41564	7.05939	1.82168	5.59892	2.47804	2.78857	6.91565	0.910023	2.6885	0.436088	0.586403	1.56387	0.329676	1.72801	0.517966	1.42964	2.59028	4.47624	1.33898	0.702674	2.19983	2.87627	0.899835	1.89875	0.783232	1.07278	1.65351	1.76201
Q9Y277	VDAC3	164.401	136.202	270.889	153.316	212.013	135.847	96.2654	143.548	39.2058	38.9445	43.9337	29.2084	61.5621	54.1704	29.5685	0.929613	18.4993	164.558	100.017	38.8334	21.3071	99.8516	165.116	38.244	72.1334	38.3039	44.6242	55.7431	28.0712
P62263	RPS14	2470.59	2264.29	3987.77	2040.66	3115.02	1920.99	1595.8	2193.84	600.198	510.825	597.269	480.07	877.657	693.498	388.503	1.11315	358.465	2567.63	1672.91	558.159	345.258	1751.04	2522.67	680.077	1225.77	623.364	672.248	716.312	401.215
Q9GZZ9	UBA5	23.0518	10.6264	27.2617	13.9723	20.8237	14.413	9.80581	17.5789	2.67788	6.63259	2.25842	4.16007	6.21364	7.3545	2.98236	1.0948	2.73492	10.1636	9.99181	2.79049	1.75681	6.76546	12.1951	3.2701	9.18914	2.51711	3.73137	9.26908	3.63289
P36543	ATP6V1E1	135.475	156.167	210.79	128.445	160.343	89.9427	77.5348	152.278	33.0032	35.9128	30.8053	32.0251	54.1153	48.2946	23.2164	0.557816	14.9108	136.573	59.718	40.3238	19.8215	65.1443	125.319	25.9548	65.4217	39.4582	40.2137	49.4956	14.2065
Q9NP79	VTA1	70.7127	47.7892	82.4017	51.2793	78.4944	34.294	35.3171	58.4267	15.4931	17.8283	10.4811	7.25868	14.7457	15.225	12.2741	0.645392	6.64827	50.0154	43.8563	15.9083	6.51597	34.9931	52.9968	16.9697	28.9188	14.2251	15.4737	18.7999	9.54595
P62888	RPL30	796.278	650.131	1152.43	677.553	935.476	582.469	470.271	623.814	184.502	168.289	195.48	134.945	255.722	214.846	115.456	0.3938	95.664	717.829	467.849	158.985	103.792	501.278	732.065	195.074	362.042	178.771	203.53	221.087	104.523
Q96A72	MAGOHB	187.934	156.504	294.862	183.069	239.586	179.991	125.065	143.419	52.0707	57.4528	53.3263	35.2316	66.0493	61.6102	33.8844	0.708446	25.1424	181.059	78.7028	43.4882	26.7595	107.642	176.105	50.1708	103.175	45.807	50.9332	62.6292	7.00308
Q08945	SSRP1	99.8618	87.9305	149.783	97.5237	123.348	91.1858	67.9178	70.2691	27.6062	30.3568	26.8356	19.837	29.8716	28.4216	18.5088	0.711453	12.8929	87.7124	40.2795	23.1183	12.3143	48.6975	88.6082	24.2488	52.0957	21.1731	28.681	30.7896	5.82003
P26196	DDX6	32.9004	29.5455	60.0026	27.2803	50.4311	28.6195	18.0189	28.2265	10.7055	9.97715	7.78781	6.69082	10.0646	12.1219	4.83427	1.98831	5.42732	29.3793	23.2409	8.06095	3.66936	18.4332	28.8876	7.56826	18.2583	7.05674	9.0436	12.9381	3.59078
P62249	RPS16	821.434	647.315	1181.28	651.881	893.705	593.73	473.898	600.755	198.836	181.568	191.32	139.542	262.531	197.327	117.042	1.28148	102.172	700.745	340.034	159.904	92.8004	455.924	744.486	172.288	374.169	189.429	199.424	212.116	125.914
Q96N66	MBOAT7	51.6254	49.7691	98.5337	45.1202	68.3958	46.905	38.9173	54.5557	16.9631	13.2759	13.6608	8.81094	25.3023	19.4993	9.96678	0.907774	7.85577	62.5747	25.5419	15.332	8.70067	32.9339	62.9138	14.7637	29.0746	13.1112	17.5748	19.1952	4.66731
Q12906	ILF3	262.59	256.488	464.814	248.972	363.719	220.124	184.107	218.682	76.9237	65.5295	70.3938	47.0562	101.15	81.9977	48.0398	1.1502	39.5887	271.81	152.177	65.2353	36.3577	181.421	263.12	62.7747	136.622	67.6165	79.9017	88.2358	37.4019
P26373	RPL13	1781.88	1568.45	2959.27	1570.33	2332.7	1500.35	1160.83	1466.25	438.52	426.645	447.872	353.091	641.442	507.9	277.875	1.17591	245.463	1820.66	1146.1	394.074	248.765	1287.52	1809.89	493.795	912.587	443.165	490.819	542.981	289.511
P63162	SNRPN	145.211	84.498	167.199	114.285	138.346	80.8211	63.4633	76.7973	26.9078	36.7939	30.2813	17.141	37.639	40.8045	17.281	0.931332	15.0356	90.2625	60.3273	25.7991	12.3092	50.1812	93.1064	26.3783	59.1286	22.8307	26.8572	39.8005	13.353
P01911	HLA-DRB1	240.386	187.67	402.738	218.74	288.72	210.906	172.738	181.756	64.2332	92.5228	65.1052	41.131	90.947	97.1589	38.2059	0.869502	32.2998	237.907	94.425	51.4997	33.815	142.695	239.274	51.0638	120.526	45.0616	60.0203	105.183	19.7913
P32456	GBP2	75.3538	72.5699	133.319	68.8019	99.3767	62.1697	50.0797	68.4897	19.3882	26.1618	23.4593	15.7575	27.3627	26.7116	15.4802	0.97328	9.7727	83.615	59.2949	15.5718	13.3039	55.0016	69.5568	16.0847	41.704	15.867	18.37	26.4736	6.08267
P28062	PSMB8	139.763	125.91	233.691	131.316	196.204	121.985	92.8884	130.855	40.1335	42.4854	32.8189	27.4595	51.7555	44.676	23.0852	0.987147	17.0128	173.474	117.027	34.147	18.4175	118.565	170.647	33.2675	81.1141	36.0669	42.3669	57.486	27.2579
Q9NTJ5	SACM1L	15.6691	12.1048	29.6929	11.5319	27.344	10.1872	7.81509	20.0705	4.99449	4.22975	3.72869	2.4054	6.64933	6.53267	2.62178	0.592986	3.06711	16.3408	13.3187	3.63372	2.33854	11.3731	17.2228	2.92957	8.16189	4.10978	4.84587	6.69234	6.88079
P17844	DDX5	211.88	180.262	335.661	197.747	261.76	182.371	129.898	167.879	56.6687	45.7422	57.4098	35.7975	73.3696	57.6842	34.2379	1.75391	29.8815	182.674	127.039	44.9977	27.0846	120.528	200.202	52.4962	107.672	51.1683	54.4468	57.5091	27.1899
P20339	RAB5A	126.679	103.92	137.779	108.932	94.7015	55.0154	60.6488	107.954	15.5491	21.9311	18.0669	12.3831	33.1606	43.4421	11.7014	0.376766	10.9389	117.729	101.653	39.4456	17.1043	85.0793	91.7469	22.5476	54.4345	38.0605	37.9753	38.0944	15.9298
P62857	RPS28	1458.03	1224.19	2289.73	1264.35	1817.12	1119.61	916.644	1217.41	325.694	317.41	359.828	275.165	525.068	400.167	231.678	1.20171	222.309	1485.45	847.243	340.614	199.521	1018.73	1449.27	404.331	753.066	380.745	400.424	440.4	146.504
P62330	ARF6	196.252	172.324	301.995	192.025	232.827	122.926	110.387	188.379	40.5446	49.9769	42.4732	32.4831	66.5405	68.8919	29.7022	1.23184	24.3796	175.675	109.738	58.1801	27.2314	107.426	186.036	36.0902	93.7729	53.3212	66.7881	55.8654	20.4728
Q9NPH2	ISYNA1	59.505	31.7878	93.3371	39.4672	68.5056	42.904	37.7804	37.9301	15.8436	16.699	10.1451	4.28678	19.4604	17.2586	8.65508	1.23734	9.27716	55.2398	47.6449	12.1781	7.04235	36.5938	47.3886	12.0454	28.9658	13.2656	12.9599	19.2513	10.4589
P16144	ITGB4	36.5545	27.2501	40.947	34.7394	39.5948	26.582	16.9976	27.6456	7.4045	6.37202	9.26119	4.45041	9.94816	9.25317	6.26156	0.893831	3.15773	28.6866	14.7603	8.60763	4.36718	16.3458	30.5839	8.06592	15.7606	8.11646	9.63546	7.42802	3.13991
Q9NVA2	SEPTIN11	72.2543	54.9033	147.706	68.2581	100.368	58.0518	50.9101	68.6979	23.3291	28.7671	18.038	14.5602	36.2315	26.6057	12.9371	0.408306	12.6236	89.2735	88.8107	14.5478	10.3546	78.614	74.172	15.3499	35.9389	15.6537	17.5381	33.2914	28.5859
P00558	PGK1	2380.16	2020.81	3557.23	1801.66	2811.92	1544.15	1394.66	2143.63	549.663	608.142	471.679	329.625	830.235	683.678	362.798	0.70118	280.495	2603.88	1849.67	587.685	264.969	1470.02	2526.02	511.633	1185.42	608.424	645.689	742.833	595.156
P32969	RPL9	476.631	358.725	753.135	361.936	602.811	339.526	280.874	375.449	132.007	108.646	102.162	85.666	139.459	123.185	72.0088	0.948745	55.0849	418.402	355.238	96.0403	59.4802	285.816	424.639	119.496	235.982	107.292	110.678	150.798	97.819
Q6DKI1	RPL7L1	11.3795	10.9912	27.1353	11.9263	24.5545	13.56	8.98061	11.3164	3.99534	5.13067	4.42753	3.41817	5.54765	4.60792	2.68783	0.563021	2.06671	12.1952	8.04502	2.77855	1.46926	9.69315	12.0835	3.99986	7.47401	3.89297	4.51969	4.6866	1.71364
Q9BWF3	RBM4	33.3213	31.9466	55.9242	24.3033	44.34	28.4562	21.3445	29.3021	9.93143	10.0367	7.97718	6.33989	12.6974	9.38714	7.13044	0.724526	5.46987	28.5318	14.7833	7.83956	3.25511	16.0234	29.7706	8.11723	17.7419	7.09355	8.75979	11.0586	2.7972
P51659	HSD17B4	229.524	214.355	370.456	226.993	302.566	174.689	153.217	186.684	55.9345	68.8777	62.5877	41.6335	79.0417	79.292	40.5263	1.08272	24.4368	219.036	128.619	61.3414	37.957	135.165	233.548	54.4478	115.155	54.9819	69.7137	73.8754	17.6931
P20073	ANXA7	289.475	338.23	533.854	274.735	433.165	256.619	199.241	318.839	75.0838	84.4298	66.2693	58.6879	136.632	111.883	50.3913	1.27261	36.892	463.976	443.135	100.077	54.5982	325.123	429.954	96.404	182.179	111.117	122.361	123.263	109.211
P43243	MATR3	357.795	315.369	529.825	326.992	445.353	315.243	249.504	271.379	100.141	101.399	91.7242	61.4676	102.829	103.463	68.4343	0.0478534	41.2096	371.306	177.349	80.4968	43.8627	243.421	368.906	87.4359	179.3	87.1463	98.6322	117.491	41.1449
Q15020	SART3	18.8615	12.3978	28.6245	17.1188	25.4499	15.721	10.3886	15.0145	6.3052	6.20138	3.74247	2.79628	5.35959	5.67677	3.05795	0.567587	2.56876	13.2905	8.52697	3.90506	2.09706	8.42771	14.8215	4.24511	10.2361	3.46257	4.44853	6.74185	1.96094
O15371	EIF3D	58.9121	64.1223	90.3838	52.3164	78.8059	54.4527	39.5926	54.7172	16.0188	15.3625	14.3746	9.49495	17.71	16.5179	11.6768	1.66321	7.73272	54.4213	32.2508	13.9065	7.11393	32.7665	52.553	14.8718	30.9418	14.8069	17.8018	19.6261	5.69378
P98175	RBM10	10.1012	7.98122	20.3197	10.6443	17.0742	9.14597	5.68013	12.2172	3.96829	4.10825	3.46557	2.15139	4.24398	3.70969	1.43089	0.149822	2.5572	9.70132	6.02977	2.55563	1.92064	6.69324	10.1163	3.22202	6.13085	2.29728	2.28598	4.29406	1.05065
P60842	EIF4A1	1262.75	1155.56	1977.59	1020.56	1580.26	956.546	795.941	1092.5	309.177	316.451	302.024	207.26	437.357	367.972	194.645	0.496222	168.003	1304.87	1032.69	304.843	173.403	948.134	1259.68	301.408	629.59	307.724	348.117	416.253	185.681
Q8WXX5	DNAJC9	93.2676	63.2688	159.636	73.9212	113.678	73.9944	50.925	89.6914	27.3743	23.5747	21.7048	13.9982	34.8006	28.8162	15.4663	0.229661	16.8858	81.8242	64.6411	20.1825	11.2493	62.2931	74.2028	23.0917	44.5199	20.3846	20.5689	32.4706	11.6436
P16152	CBR1	243.5	214.653	318.483	198.042	260.324	149.795	129.287	202.117	55.3758	46.8558	58.8115	33.4035	81.7649	63.9368	34.8543	0.825251	31.3692	211.491	265.864	49.6916	33.1905	187.792	203.794	47.2108	111.271	46.8109	51.0035	58.1803	70.631
P61769	B2M	1645.02	1367.65	2736.12	1676.12	2131.75	1321.42	1104.04	1517.34	367.382	491.119	386.017	317.247	602.663	639.349	255.921	1.49342	204.78	1718.43	980.546	471.464	218.668	1122.86	1654.67	391.407	816.815	483.668	546.249	641.321	118.664
Q07021	C1QBP	268.176	260.583	348.883	264.141	283.023	228.588	162.533	168.179	63.8606	71.6699	68.4764	45.9118	66.4253	79.3601	53.5022	1.01593	23.0669	235.963	85.0284	70.226	36.6815	112.462	217.819	58.0231	121.026	71.6983	75.847	81.8462	14.8963
P26641	EEF1G	550.009	506.936	946.127	465.061	804.457	436.129	365.67	516.98	133.139	148.685	134.661	101.584	203.341	168.92	89.2358	1.12903	76.0091	630.619	461.261	144.675	91.1258	456.637	598.997	155.308	293.287	137.949	171.088	186.943	113.887
Q99961	SH3GL1	81.0378	55.3932	109.515	76.6679	89.7175	45.6243	35.9184	77.977	14.2637	19.0657	16.6251	12.0832	21.1932	27.6954	8.76287	0.578948	9.45198	70.7926	52.7414	20.7345	10.1256	42.4226	62.5167	18.0577	40.6306	18.3713	22.1755	23.1323	11.6643
P84090	ERH	794.455	733.933	1287.66	720.308	1038.6	690.46	566.426	607.6	211.906	224.21	199.609	148.267	272.534	239.303	118.034	1.04457	108.339	749.705	449.548	191.453	105.651	538.761	773.885	198.392	421.369	179.295	223.856	268.475	95.1264
Q99622	C12orf57	36.2895	25.8461	47.4007	29.6761	34.6877	30.1727	25.5174	20.8903	10.9532	9.01851	7.94161	5.32779	10.6446	6.57083	6.80326	0.721547	6.76466	30.2502	14.0507	6.77922	3.27794	20.5251	27.852	8.6837	19.2454	5.78739	5.94991	6.84421	2.9668
Q9NVP1	DDX18	33.4708	27.4489	41.6323	28.453	35.8341	27.8252	19.1547	20.9289	7.57779	7.49269	7.86498	4.81518	8.28693	7.56865	5.15377	0.77354	3.85598	30.688	13.2875	7.27945	3.85568	18.4259	30.8698	10.2645	17.9307	8.73019	7.94692	8.77508	1.6233
Q9H074	PAIP1	27.907	18.9527	39.795	20.1609	32.9582	16.325	13.821	26.5612	6.07782	5.78217	6.34586	5.73262	9.55593	6.36818	4.12179	0.84421	4.57244	20.966	17.0862	4.95309	3.39284	15.608	24.5437	5.03843	12.5788	5.45402	5.69528	7.79308	3.41266
Q9BUR5	APOO	73.2652	53.4371	125.702	70.6784	91.7562	63.6339	42.3348	73.433	20.2493	19.0314	19.8337	15.7921	26.5507	21.4197	14.883	0.800909	11.9281	71.0728	47.4261	16.2274	8.16667	44.5626	73.0149	18.6111	39.9544	18.2758	18.4423	22.7801	7.78138
Q9NPE3	NOP10	96.5836	40.6599	120.223	46.1285	98.3085	51.9824	49.2588	59.2647	23.0119	32.8139	12.7979	9.01245	20.74	29.9324	9.92968	0.682621	15.2532	59.1371	55.3741	14.5302	9.63052	56.1341	58.0161	19.9317	47.4444	15.2743	16.8946	36.4962	7.02259
P15927	RPA2	81.9651	71.901	128.461	70.7584	99.3958	70.0074	58.0829	58.8816	26.6208	21.1947	23.3928	16.6532	27.9854	25.8782	12.9154	0.458005	10.8886	75.7849	36.027	18.6792	11.9618	47.019	80.055	17.1588	42.671	17.199	20.0091	29.9454	4.61818
Q96HY6	DDRGK1	60.9236	60.1528	95.1076	48.4785	77.772	52.4403	36.4052	43.4207	17.5813	14.6477	18.1907	9.58694	18.0212	19.6383	10.2638	0.547262	7.4326	53.2624	30.3497	14.7472	9.51942	32.3479	55.4338	15.9051	31.8035	13.4956	15.347	18.1276	5.12611
Q9HB71	CACYBP	155.094	125.062	268.933	146.435	223.479	146.54	101.859	139.582	39.0601	40.775	36.461	26.3652	49.2175	48.5265	29.2882	0.732973	24.0462	148.486	147.984	35.8182	18.1354	101.039	132.959	39.3763	83.1364	33.1563	39.9949	55.2113	50.9356
Q9H307	PNN	35.9263	24.1144	57.9897	26.6729	43.8043	24.2974	19.6991	33.0422	8.98829	9.32262	8.36921	7.89378	13.2033	10.1568	5.41012	1.39096	6.02641	24.3346	18.1765	6.94757	4.08676	18.7302	28.597	7.42021	16.7125	5.45011	8.69677	10.2743	3.066
Q9UNH7	SNX6	23.7269	21.1776	41.124	23.4027	32.9658	20.2663	13.7022	24.3445	7.48112	7.37727	6.67557	4.5341	9.6572	6.94148	3.94668	0.78255	4.65555	30.2171	27.371	4.9273	4.00393	29.7637	20.0799	5.69337	13.2732	3.75096	6.67885	8.17443	6.88918
P11388	TOP2A	38.6038	40.4595	66.9756	39.6473	51.9416	45.7663	26.4115	26.0059	13.1694	10.1647	13.1265	9.02771	11.8378	12.538	6.89212	1.26147	5.48974	38.1147	14.5021	9.08046	6.18423	22.0785	35.5175	13.7845	24.5774	11.3714	11.4558	12.2327	1.84532
Q07020	RPL18	2179.84	1916.95	3293.32	1861.39	2668.33	1708.59	1421.26	1697.4	462.358	500.824	518.244	393.818	692.377	591.054	342.948	0.902004	283.918	2096.11	1279.26	459.106	296.271	1343.59	2060.02	569.267	1102.52	533.418	550.059	638.7	345.392
P40939	HADHA	346.222	299.585	520.868	306.279	408.475	253.123	212.315	270.472	78.3657	91.5276	79.6494	57.6463	114.988	114.918	52.067	1.05878	38.7718	363.808	251.101	84.0568	41.6516	225.442	331.524	79.5615	161.119	82.4312	87.3306	107.15	49.8794
P56537	EIF6	745.582	749.746	1273.13	781.707	996.791	666.021	587.982	620.388	202.557	221.471	231.219	172.763	264.758	273.344	167.938	0.804285	78.2922	661.198	333.238	211.598	134.461	385.619	610.861	178.929	360.206	181.26	225.035	285.523	29.9221
P30086	PEBP1	670.484	637.735	1203.04	668.098	864.68	532.219	467.79	653.579	170.612	187.426	192.005	139.063	283.245	212.727	118.211	0.96073	93.0508	923.607	1175.55	196.985	122.332	794.408	762.394	193.433	383.497	195.63	223.202	224.417	433.329
O75569	PRKRA	7.14102	5.33029	16.6854	4.19495	15.5681	5.36016	3.90747	9.97368	3.64116	3.78554	1.83215	1.60744	3.85261	3.06913	1.2716	1.64943	2.40681	9.4443	11.7617	1.74678	1.07451	8.70229	7.97721	2.1351	5.01682	1.56336	2.29955	3.78976	2.27098
P04406	GAPDH	8978.27	8369.8	13874.4	7486.58	11255.7	6594.48	5793.72	7806.43	1993.34	2272.27	1920.9	1336.4	3154.72	2499.04	1554.8	1.26437	1084.12	11339.7	9094.11	2498.33	1130.42	7147.11	10539	2401	4714.95	2835.12	2692.07	2971.26	2533.92
Q9Y2Q3	GSTK1	121.994	130.111	218.897	120.885	181.76	114.365	90.7005	109.652	37.6762	45.7337	37.6794	29.3757	46.53	51.7941	21.7685	0.548165	15.7872	140.487	74.8124	37.3507	21.4985	95.8637	139.635	30.3578	65.4636	33.7987	45.7854	55.5914	1.71839
P25786	PSMA1	262.556	233.336	428.587	212.775	355.038	208.58	168.758	246.242	68.3852	77.2239	56.9423	49.7214	99.6993	78.9012	42.2024	1.42658	40.2382	327.046	280.375	76.9873	39.8955	243.91	304.128	70.7775	134.882	75.684	89.8756	92.1172	34.5891
O75390	CS	389.271	371.825	590.681	325.768	480.094	297.359	253.295	299.497	83.0485	118.348	94.1926	65.604	134.713	137.881	62.6311	0.99718	46.3094	455.569	237.273	91.7655	47.4138	259.572	416.544	91.9075	208.497	100.254	109.501	150.799	44.6584
P35232	PHB	817.535	782.953	1528.75	797.431	1225.67	790.896	569.425	827.596	232.014	247.182	245.189	180.748	331.159	294.126	161.989	1.80762	114.874	994.938	530.693	210.14	128.314	589.539	913.564	236.457	475.456	223.613	241.843	306.155	130.008
Q9NVI7	ATAD3A	35.1139	26.1282	48.9717	29.2248	38.6176	28.253	19.1951	26.2507	6.76078	6.83575	8.72548	6.96936	12.0609	10.5284	5.19044	1.28942	5.42378	37.8167	16.6544	7.1833	3.7576	20.2866	35.1098	7.56102	17.2036	7.71607	7.08444	10.529	3.75261
Q96I25	RBM17	10.6095	8.40257	21.1414	9.25889	18.1653	11.2884	7.00359	8.55779	4.1425	4.9028	2.54842	2.12977	4.02565	4.03412	2.02807	1.02627	2.33063	9.63247	4.89876	2.07848	1.08949	5.97688	10.0349	2.80035	6.85857	2.09245	2.79582	4.36726	1.38635
Q53G44	IFI44L	38.0488	29.6025	45.71	39.6249	35.5847	29.5591	20.1464	27.9146	4.94021	7.27855	10.0996	8.35795	10.9511	8.66682	9.79884	0.811589	3.07144	28.7779	13.476	6.87209	6.07455	15.216	24.1895	7.62719	16.3591	6.83325	8.18007	9.05831	3.06757
P62244	RPS15A	865.661	767.414	1326.5	690.196	1032.04	642.049	509.023	696.634	211.159	212.965	200.026	139.888	290.95	231.492	127.667	0.28125	108.903	823.173	571.873	185.168	116.056	591.667	790.941	207.835	411.875	194.353	231.502	260.318	138.266
Q14696	MESD	4.89371	5.03845	18.0118	4.94775	13.8145	8.60811	5.82072	7.08002	2.0614	5.75312	2.28533	2.28383	3.59215	4.71944	1.43712	0.896631	3.21326	7.96807	3.13356	1.40138	1.00931	5.71294	6.03291	1.80068	4.84517	1.37161	1.98155	3.35222	0.903257
O43187	IRAK2	30.5123	32.7937	62.8437	27.6823	53.4197	28.2094	23.8809	30.272	8.49907	7.26706	10.2286	7.25715	13.8144	11.2098	4.80852	1.03074	5.80609	38.5073	24.119	9.13509	5.9251	25.8367	38.8361	10.1233	17.5548	9.67654	10.0629	9.98692	6.08579
Q9Y224	RTRAF	135.341	134.023	191.152	120.867	163.796	110.973	89.1568	89.4195	39.456	36.3388	35.2655	20.217	39.1965	38.8984	23.3089	0.857364	15.2674	123.571	80.145	30.2724	18.5764	86.556	125.936	33.7617	68.3874	30.371	35.1763	43.2747	8.38685
P98179	RBM3	124.519	109.215	186.877	113.004	150.427	94.3873	74.8225	102.528	37.3826	28.6846	33.894	21.5503	40.009	38.818	19.2836	0.851556	16.5839	102.424	54.1031	31.4236	17.5391	67.471	107.876	30.6991	57.8935	29.0774	36.1092	35.6157	5.29225
Q9BYX4	IFIH1	29.348	19.9578	34.6223	26.1174	17.703	14.3525	12.9585	17.9302	3.01624	2.55653	6.29017	4.2562	9.16954	7.76918	4.3269	0.942866	2.30151	18.1062	9.94756	6.49642	3.48786	7.26652	18.2691	4.82339	9.78485	5.51616	6.54214	5.52459	6.12339
P46782	RPS5	412.755	349.521	598.007	350.616	454.718	339.27	259.585	308.578	100.093	90.1819	95.4177	58.8343	137.601	93.8548	61.0573	2.17612	51.2089	417.858	303.377	90.2152	52.487	284.836	387.38	103.263	183.799	101.305	105.609	108.34	75.1292
O95786	DDX58	83.694	79.5844	140.431	77.6193	117.646	68.8839	50.3973	74.9961	21.8362	19.9294	23.7906	15.8958	27.5773	27.9658	15.1198	0.5005	9.02926	77.2082	70.5492	17.926	10.9412	40.1277	81.4932	19.5181	43.0165	19.2815	21.4311	28.7416	27.6502
P50213	IDH3A	145.799	121.277	225.665	142.286	194.316	113.958	87.4198	139.052	29.3819	40.5089	34.5608	32.6045	51.5138	47.5043	26.0358	0.648571	17.9412	155.192	87.7004	36.0738	18.6956	89.5886	144.167	35.895	72.881	35.4796	38.4965	51.1401	20.8673
P0DP25	CALM3	2254.88	2110.37	3742.31	2080.25	3335.8	1740.08	1517.99	2273.76	529.341	665.004	478.201	388.786	735.646	824.397	327.743	0.332117	281.11	2467.18	2327.61	719.898	372.951	1788.49	2438.54	563.056	1222.22	641.629	829.747	825.091	467.249
P17858	PFKL	144.959	112.521	225.711	116.006	179.32	94.1133	85.384	134.787	33.1043	36.5048	29.4937	24.6583	51.7507	40.7142	19.7929	1.37255	19.4167	144.26	106.275	31.7541	15.1408	95.0736	138.432	26.9406	68.4735	32.4594	37.6625	45.107	46.01
O15533	TAPBP	241.535	235.458	426.74	232.923	296.7	194.168	159.828	203.195	58.9884	85.2884	61.0142	52.0818	97.8622	84.9846	45.5198	1.06162	26.9864	274.333	114.454	68.3776	37.0261	141.195	268.766	57.8461	122.266	64.6737	83.1049	97.3501	19.779
P27824	CANX	662.374	524.296	1084.02	544.023	844.419	511.129	433.528	583.506	158.519	184.939	141.448	103.162	228.529	206.159	102.78	0.306278	80.3051	625.239	488.459	155.069	83.4157	393.437	667.291	143.023	335.366	148.415	181.041	218.249	175.744
P13647	KRT5	22146.6	25706.8	33225.1	19580.3	26470.4	13418.4	14697	21618.6	4778.58	4440.74	5139.55	3235.15	6991.26	6232.28	3791.52	0.0725766	1861.85	22531.6	17005.9	7434.52	3562.07	11731.6	21467.5	6286.57	9761.08	7262.36	6711.89	6275.76	5123.64
P49821	NDUFV1	82.3403	82.52	106.577	73.8828	95.6877	60.0189	69.937	71.4491	33.3008	20.5907	21.2726	19.1103	20.523	15.0392	22.0255	0.0883636	6.10413	66.2181	36.4457	20.5218	14.101	36.8556	82.0068	15.0858	33.0711	16.9459	20.0744	24.125	8.81297
P19404	NDUFV2	56.7172	45.8904	82.7834	48.8333	66.6419	50.1475	32.2098	44.8333	11.9835	21.8971	11.71	8.592	16.7239	19.623	10.4529	0.443825	7.54222	54.4669	33.2736	12.6393	5.48523	33.541	48.4727	12.6104	29.698	9.05089	12.7369	22.0653	6.4254
O95202	LETM1	37.768	33.9852	58.7709	34.4468	44.4699	31.3747	20.8631	36.4604	7.93009	8.09175	8.62227	6.9122	14.7466	11.645	6.79641	3.21499	5.61045	38.8178	14.1991	9.09911	4.98358	17.887	40.8771	9.23484	18.4884	9.78113	9.12713	11.5616	4.04828
P48556	PSMD8	31.1986	26.5107	47.645	22.2192	37.4905	22.2929	17.1369	24.9049	7.9468	9.34984	6.63644	5.07694	10.5902	10.0607	3.21713	1.2568	5.3893	29.2516	20.1639	6.22866	3.87512	18.624	28.5273	5.89354	16.7723	5.8924	6.38696	11.2657	3.02664
P05362	ICAM1	31.6748	29.1845	76.7503	32.9112	47.2235	31.3199	25.2471	43.1869	10.9188	11.582	8.04424	9.21493	19.06	10.2431	7.91491	1.19933	6.96426	32.6039	21.5663	7.62447	4.35113	21.7274	36.6017	7.95713	19.4623	7.96219	10.1974	12.0321	9.18367
O00139	KIF2A	16.6679	11.0556	30.5614	13.4005	24.5999	11.848	9.65839	13.3206	6.06237	5.75008	3.79038	2.51086	5.27068	5.60749	2.48726	0.431472	2.55737	15.6209	14.5427	2.71075	1.84694	10.4973	15.5242	3.4469	9.88687	2.89651	3.41825	6.37974	11.3855
P69849	NOMO3	25.8424	16.8334	36.236	20.9495	30.0559	16.1155	13.1667	21.3431	6.1296	6.48197	5.36767	3.97379	7.38332	7.39154	3.95629	0.341108	3.60721	19.9602	13.9449	5.31655	3.72909	14.6014	21.1052	5.21814	11.2673	4.7614	6.48642	7.23094	1.98323
Q9P2J5	LARS1	60.7753	50.1414	115.168	51.1889	96.0094	54.9987	42.1488	64.1037	16.9077	21.0138	18.4571	13.1686	25.3514	23.0812	12.0655	0.814127	10.9997	62.5876	29.8608	15.139	9.14197	35.1206	58.8132	17.5296	35.7316	14.9781	17.7888	22.382	6.152
P13010	XRCC5	352.782	293.913	630.175	309.542	510.452	293.682	235.902	315.886	101.042	107.966	85.4668	70.1336	136.489	116.524	53.6184	0.452652	51.6695	342.093	232.347	85.1597	42.6453	222.317	343.076	86.6378	184.652	83.4284	99.4685	127.736	74.0352
[truncated: 8,694 more rows]
[truncated: 1 more columns]
