# Supplementary material for: Large language models completely understand molecular characteristics of squamous cervical cancer
Source: Research Square preprint supplement (doi:10.21203/rs.3.rs-2855719/v1), 2023-05-30
Supplement: Supplementary file 2 [file 2cc8dce47c3ba55d6699bfbd.xlsx]

## Sheet: Summary
Table S3. The multi-omic profiling and the spatial proteomic profiling.
Sheet	Description
Table S3A	The proteomic profiling of 111 paired samples.
Table S3B	The phosphoproteomic profiling of 111 paired samples.
Table S3C	The WES-based somatic variants.
Table S3D	The transcriptomic profiling of 80 paired samples.
Table S3E	The spatial proteomic profiling of 113 small regions.

## Sheet: Table S3A
Table S3A. The proteomic profiling of 111 paired samples.
Protein accession	Gene name	Protein description	P001-N	P001-T	P002-N	P002-T	P003-N	P003-T	P004-N	P004-T	P005-N	P005-T	P006-N	P006-T	P007-N	P007-T	P008-N	P008-T	P009-N	P009-T	P010-N	P010-T	P011-N	P011-T	P012-N	P012-T	P013-N	P013-T	P014-N	P014-T	P015-N	P015-T	P016-N	P016-T	P017-N	P017-T	P018-N	P018-T	P019-N	P019-T	P020-N	P020-T	P021-N	P021-T	P022-N	P022-T	P023-N	P023-T	P025-N
A0A024RBG1	NUDT4B	Diphosphoinositol polyphosphate phosphohydrolase NUDT4B	NA	NA	NA	NA	NA	NA	NA	NA	NA	NA	NA	NA	NA	NA	NA	NA	NA	NA	NA	NA	NA	NA	NA	NA	NA	NA	NA	NA	NA	NA	0.530752	1.98434	0.604369	0.944306	0.367395	0.681005	0.592785	1.01226	0.502377	1.37899	NA	NA	NA	NA	NA	NA	NA
A0A075B6H9	IGLV4-69	Immunoglobulin lambda variable 4-69	6.87905	3.45459	2.43202	2.64893	19.5909	8.74213	24.9763	9.56715	24.4897	8.56977	6.95166	1.69427	4.94097	4.82496	2.87388	1.24522	10.0585	3.77754	13.7887	1.81143	NA	NA	NA	NA	NA	NA	NA	NA	NA	NA	4.61647	1.54507	4.51374	1.64233	2.96606	1.97363	9.85104	3.98309	3.31581	1.25708	NA	NA	NA	NA	NA	NA	NA
A0A075B6I1	IGLV4-60	Immunoglobulin lambda variable 4-60	NA	NA	NA	NA	NA	NA	NA	NA	NA	NA	NA	NA	NA	NA	NA	NA	NA	NA	NA	NA	NA	NA	NA	NA	NA	NA	NA	NA	NA	NA	11.3437	2.8702	6.82121	1.97382	3.68819	1.79342	13.1619	1.97626	4.23714	1.20358	NA	NA	NA	NA	NA	NA	NA
A0A075B6I9	IGLV7-46	Immunoglobulin lambda variable 7-46	4.69523	1.9315	3.70745	1.36931	3.52308	1.30979	5.06729	1.50711	5.93422	2.49306	3.63564	1.17517	2.34815	1.06577	1.71267	1.8352	6.88973	1.66199	4.04295	1.12629	4.90878	1.59541	6.45509	1.26714	3.408	3.36162	6.29763	3.82478	2.70082	1.82206	8.60918	2.69113	13.9673	3.98601	11.442	5.39634	15.9585	3.50933	10.5168	2.80459	7.9813	2.50002	4.23635	1.98415	3.43235	1.89768	3.65918
A0A075B6J9	IGLV2-18	Immunoglobulin lambda variable 2-18	NA	NA	NA	NA	NA	NA	NA	NA	NA	NA	2.66891	1.13974	2.47054	2.05745	6.59723	2.88957	2.31483	1.39322	1.96582	1.0073	10.8915	3.21032	14.2561	3.31085	7.08253	4.53376	11.741	15.4806	4.94023	1.76222	3.01003	3.53369	0.831044	0.96893	0.630247	0.748945	0.714866	0.918853	0.832665	0.760031	NA	NA	NA	NA	NA	NA	NA
A0A075B6K0	IGLV3-16	Immunoglobulin lambda variable 3-16	0.823207	0.833428	0.788718	0.751533	0.813682	0.649459	0.934328	0.718393	5.9753	1.56717	1.00843	0.62268	0.936603	0.680414	0.839358	1.82297	1.82996	1.11563	0.768798	0.645268	0.713977	0.900429	0.859474	0.881812	0.914632	1.19195	2.87196	2.43601	0.815848	0.783414	NA	NA	NA	NA	NA	NA	NA	NA	NA	NA	0.988868	0.804814	1.06679	0.714477	5.09244	1.69612	7.31845
A0A075B6K2	IGLV3-12	Immunoglobulin lambda variable 3-12	4.33826	4.36277	5.98754	7.67678	5.66761	2.97667	7.44286	2.78158	28.1238	4.68806	NA	NA	NA	NA	NA	NA	NA	NA	NA	NA	NA	NA	NA	NA	NA	NA	NA	NA	NA	NA	30.0993	2.09769	1.16865	1.277	1.43111	0.873131	1.05733	1.2165	1.51156	0.751779	NA	NA	NA	NA	NA	NA	NA
A0A075B6K4	IGLV3-10	Immunoglobulin lambda variable 3-10	NA	NA	NA	NA	NA	NA	NA	NA	NA	NA	4.47073	1.53765	4.03567	1.60259	3.43171	4.50541	9.45579	2.43483	6.73384	1.52241	1.56219	0.719051	1.60278	0.821914	1.31433	1.297	2.2408	1.69604	1.13859	0.873753	14.8155	1.88552	3.10737	1.19608	3.14623	2.85316	8.41372	4.40081	2.86853	1.00217	8.0501	3.16183	3.48049	1.7415	2.33508	1.68137	1.80256
A0A075B6K5	IGLV3-9	Immunoglobulin lambda variable 3-9	4.33826	4.36277	5.98754	7.67678	5.66761	2.97667	7.44286	2.78158	28.1238	4.68806	NA	NA	NA	NA	NA	NA	NA	NA	NA	NA	NA	NA	NA	NA	NA	NA	NA	NA	NA	NA	30.0993	2.09769	1.16865	1.277	1.43111	0.873131	1.05733	1.2165	1.51156	0.751779	NA	NA	NA	NA	NA	NA	NA
A0A075B6P5	IGKV2-28	Immunoglobulin kappa variable 2-28	2.67122	1.32429	1.9646	1.33373	2.47608	1.54729	4.78556	1.46649	6.05593	2.11821	8.38073	1.93656	5.02499	2.54956	4.07008	2.55482	12.1125	2.23698	6.271	1.61715	4.16164	1.53662	4.75312	1.69337	3.44029	2.84502	10.2817	6.00955	3.10845	2.27526	12.5276	2.08427	6.74373	1.92368	4.56291	2.41508	7.81025	1.95876	6.86086	1.88361	5.16121	1.98025	2.97822	1.72612	2.51956	1.67609	3.71241
A0A075B6Q5	IGHV3-64	Immunoglobulin heavy variable 3-64	NA	NA	NA	NA	NA	NA	NA	NA	NA	NA	NA	NA	NA	NA	NA	NA	NA	NA	NA	NA	0.591064	0.42407	0.651726	0.420174	0.389708	0.442112	0.589165	0.653575	0.273925	0.626915	3.57315	1.6529	3.28394	1.60517	1.70169	1.09647	2.21672	1.15224	1.53519	0.746561	2.63521	1.63762	2.06636	2.43293	0.600633	0.600009	0.804504
A0A075B6S2	IGKV2D-29	Immunoglobulin kappa variable 2D-29	NA	NA	NA	NA	NA	NA	NA	NA	NA	NA	NA	NA	NA	NA	NA	NA	NA	NA	NA	NA	1.37965	0.63892	1.51965	0.775847	1.044	1.3307	1.96976	1.4178	1.10457	0.915946	NA	NA	NA	NA	NA	NA	NA	NA	NA	NA	NA	NA	NA	NA	NA	NA	NA
A0A075B6S6	IGKV2D-30	Immunoglobulin kappa variable 2D-30	NA	NA	NA	NA	NA	NA	NA	NA	NA	NA	NA	NA	NA	NA	NA	NA	NA	NA	NA	NA	1.37965	0.63892	1.51965	0.775847	1.044	1.3307	1.96976	1.4178	1.10457	0.915946	NA	NA	NA	NA	NA	NA	NA	NA	NA	NA	NA	NA	NA	NA	NA	NA	NA
A0A075B759	PPIAL4E	Peptidyl-prolyl cis-trans isomerase A-like 4E	0.680954	0.697535	0.39042	1.09335	0.533742	0.729906	0.507492	0.87064	0.582741	1.07838	0.699847	0.995288	0.451798	0.961144	0.41058	1.00757	0.563645	1.04238	0.544965	0.967618	0.863198	1.26606	0.827514	1.14136	0.839924	0.940204	0.749591	1.02225	0.885126	1.11682	0.679177	1.03488	0.584653	1.06647	0.529936	0.892145	0.734823	1.60412	0.539551	0.986808	0.72049	0.954087	0.518892	1.20885	0.68548	1.20393	0.66362
A0A075B767	PPIAL4H	Peptidyl-prolyl cis-trans isomerase A-like 4H	0.680954	0.697535	0.39042	1.09335	0.533742	0.729906	0.507492	0.87064	0.582741	1.07838	0.699847	0.995288	0.451798	0.961144	0.41058	1.00757	0.563645	1.04238	0.544965	0.967618	0.863198	1.26606	0.827514	1.14136	0.839924	0.940204	0.749591	1.02225	0.885126	1.11682	0.679177	1.03488	0.584653	1.06647	0.529936	0.892145	0.734823	1.60412	0.539551	0.986808	0.72049	0.954087	0.518892	1.20885	0.68548	1.20393	0.66362
A0A087WSX0	IGLV5-45	Immunoglobulin lambda variable 5-45	NA	NA	NA	NA	NA	NA	NA	NA	NA	NA	10.6276	1.67529	2.04766	1.73545	8.75657	13.4094	10.2572	1.91066	5.76203	1.157	NA	NA	NA	NA	NA	NA	NA	NA	NA	NA	NA	NA	NA	NA	NA	NA	NA	NA	NA	NA	NA	NA	NA	NA	NA	NA	NA
A0A087WSY6	IGKV3D-15	Immunoglobulin kappa variable 3D-15	NA	NA	NA	NA	NA	NA	NA	NA	NA	NA	NA	NA	NA	NA	NA	NA	NA	NA	NA	NA	NA	NA	NA	NA	NA	NA	NA	NA	NA	NA	NA	NA	NA	NA	NA	NA	NA	NA	NA	NA	NA	NA	NA	NA	NA	NA	NA
A0A087WSZ0	IGKV1D-8	Immunoglobulin kappa variable 1D-8	NA	NA	NA	NA	NA	NA	NA	NA	NA	NA	NA	NA	NA	NA	NA	NA	NA	NA	NA	NA	NA	NA	NA	NA	NA	NA	NA	NA	NA	NA	NA	NA	NA	NA	NA	NA	NA	NA	NA	NA	NA	NA	NA	NA	NA	NA	NA
A0A087WUL8	NBPF19	Neuroblastoma breakpoint family member 19	NA	NA	NA	NA	NA	NA	NA	NA	NA	NA	NA	NA	NA	NA	NA	NA	NA	NA	NA	NA	NA	NA	NA	NA	NA	NA	NA	NA	NA	NA	NA	NA	NA	NA	NA	NA	NA	NA	NA	NA	NA	NA	NA	NA	NA	NA	NA
A0A087WW87	IGKV2-40	Immunoglobulin kappa variable 2-40	2.67122	1.32429	1.9646	1.33373	2.47608	1.54729	4.78556	1.46649	6.05593	2.11821	8.38073	1.93656	5.02499	2.54956	4.07008	2.55482	12.1125	2.23698	6.271	1.61715	4.16164	1.53662	4.75312	1.69337	3.44029	2.84502	10.2817	6.00955	3.10845	2.27526	12.5276	2.08427	6.74373	1.92368	4.56291	2.41508	7.81025	1.95876	6.86086	1.88361	5.16121	1.98025	2.97822	1.72612	2.51956	1.67609	3.71241
A0A096LP55	UQCRHL	Cytochrome b-c1 complex subunit 6-like, mitochondrial	0.69033	0.867328	0.413683	1.1236	0.653719	0.518779	0.465013	0.745381	0.477871	0.936591	NA	NA	NA	NA	NA	NA	NA	NA	NA	NA	NA	NA	NA	NA	NA	NA	NA	NA	NA	NA	NA	NA	NA	NA	NA	NA	NA	NA	NA	NA	NA	NA	NA	NA	NA	NA	NA
A0A0A0MRZ7	IGKV2D-26	Immunoglobulin kappa variable 2D-26	NA	NA	NA	NA	NA	NA	NA	NA	NA	NA	NA	NA	NA	NA	NA	NA	NA	NA	NA	NA	1.37965	0.63892	1.51965	0.775847	1.044	1.3307	1.96976	1.4178	1.10457	0.915946	NA	NA	NA	NA	NA	NA	NA	NA	NA	NA	NA	NA	NA	NA	NA	NA	NA
A0A0A0MRZ8	IGKV3D-11	Immunoglobulin kappa variable 3D-11	NA	NA	NA	NA	NA	NA	NA	NA	NA	NA	NA	NA	NA	NA	NA	NA	NA	NA	NA	NA	NA	NA	NA	NA	NA	NA	NA	NA	NA	NA	NA	NA	NA	NA	NA	NA	NA	NA	NA	NA	NA	NA	NA	NA	NA	NA	NA
A0A0A0MS14	IGHV1-45	Immunoglobulin heavy variable 1-45	NA	NA	NA	NA	NA	NA	NA	NA	NA	NA	NA	NA	NA	NA	NA	NA	NA	NA	NA	NA	NA	NA	NA	NA	NA	NA	NA	NA	NA	NA	NA	NA	NA	NA	NA	NA	NA	NA	NA	NA	NA	NA	NA	NA	NA	NA	NA
A0A0A0MS15	IGHV3-49	Immunoglobulin heavy variable 3-49	4.60438	3.35701	6.46711	5.86093	9.76298	4.99159	10.774	4.70876	20.0276	6.55383	8.01236	2.52364	5.24321	23.3931	9.07795	4.96231	12.4133	3.12521	8.75067	2.65579	8.9697	3.54926	6.43199	1.63271	5.9826	3.70652	22.5271	11.759	4.55718	1.80457	22.1539	2.82264	10.6728	2.49407	4.40225	2.57053	7.40966	1.85517	6.02254	1.92087	47.0445	24.0472	35.1497	22.8708	19.3616	11.9011	43.7847
A0A0A0MT36	IGKV6D-21	Immunoglobulin kappa variable 6D-21	2.60871	1.60831	3.56556	0.899324	2.11593	1.94539	2.31437	1.11967	13.3982	7.00558	5.72013	0.974553	1.49442	1.04197	5.77531	3.12958	12.6258	1.87863	3.54766	1.07104	3.04321	0.680075	2.03691	0.609375	1.89356	2.14716	8.03395	12.9121	0.839601	0.647481	2.09498	0.969719	5.70693	1.6194	1.72954	1.6489	3.27579	1.10582	5.31544	1.41313	3.86396	1.62654	2.59741	0.805893	2.75802	1.05377	2.72539
A0A0B4J1U3	IGLV1-36	Immunoglobulin lambda variable 1-36	NA	NA	NA	NA	NA	NA	NA	NA	NA	NA	2.58773	1.18158	3.32067	4.21659	1.34387	0.870507	7.06696	1.407	4.21701	0.998046	NA	NA	NA	NA	NA	NA	NA	NA	NA	NA	8.77162	2.40937	3.97704	1.72879	1.36736	1.06744	14.5325	1.52293	10.671	2.56539	NA	NA	NA	NA	NA	NA	NA
A0A0B4J1U7	IGHV6-1	Immunoglobulin heavy variable 6-1	3.8391	1.75643	3.09755	2.12139	3.6978	2.01866	6.92024	2.27173	9.09374	3.47988	12.4744	2.3417	6.50706	2.22387	4.14335	2.94867	9.15637	2.38438	3.6422	1.43652	4.05797	1.66124	4.73988	2.05344	1.92997	1.36546	11.2552	6.92509	1.81807	1.35357	21.5671	5.6757	8.83093	2.43154	8.11506	3.6021	10.1088	1.97893	8.51662	1.73417	24.7512	8.33288	18.2185	7.9497	19.4897	7.12593	15.5686
A0A0B4J1V0	IGHV3-15	Immunoglobulin heavy variable 3-15	1.67848	0.725783	0.755858	0.893741	1.28981	0.948797	1.89179	1.03433	3.52013	1.3997	4.82652	1.65627	7.23219	33.7597	4.17779	1.45249	9.66364	2.3591	3.55384	1.42561	2.15926	0.873901	2.14323	0.893377	1.59832	1.19426	3.44227	1.8707	1.05892	0.78889	1.43679	0.641206	0.835967	0.574008	0.773799	0.739702	2.00114	0.864607	1.1921	1.35974	28.9514	9.67779	19.2116	12.3703	14.5295	14.8895	32.1236
A0A0B4J1V1	IGHV3-21	Immunoglobulin heavy variable 3-21	4.99809	2.34819	3.11572	2.16556	3.82467	3.07864	6.23094	2.55542	13.9441	6.45524	4.07533	1.42726	2.58922	1.35348	1.98453	1.93514	4.22901	1.46212	4.43165	1.19946	9.4894	2.87561	8.86889	2.92297	6.8688	6.12137	13.6418	7.74939	4.44813	3.1465	6.23393	2.23799	3.29786	1.74178	2.38055	1.52042	5.84575	1.55577	2.80242	2.01745	7.49409	2.1708	3.03224	1.71652	2.11759	1.47488	2.66358
A0A0B4J1V2	IGHV2-26	Immunoglobulin heavy variable 2-26	NA	NA	NA	NA	NA	NA	NA	NA	NA	NA	2.5508	0.945049	1.83592	9.16619	1.37763	1.0653	3.50716	1.43504	3.11221	1.10931	0.679394	0.457178	0.805735	0.555577	1.09587	0.78526	0.913978	0.854689	0.58789	0.462311	NA	NA	NA	NA	NA	NA	NA	NA	NA	NA	3.1063	0.977364	1.00981	1.07557	3.93264	0.565288	0.680287
A0A0B4J1X5	IGHV3-74	Immunoglobulin heavy variable 3-74	NA	NA	NA	NA	NA	NA	NA	NA	NA	NA	14.7852	3.91606	18.2721	81.3263	7.73227	6.22753	27.7998	4.19343	22.2421	4.29518	14.566	8.10299	20.8536	5.47776	10.6971	9.13207	24.9117	15.5114	6.20584	3.71685	NA	NA	NA	NA	NA	NA	NA	NA	NA	NA	27.5573	11.7257	17.4206	11.0969	3.67706	2.96145	8.65473
A0A0B4J1X8	IGHV3-43	Immunoglobulin heavy variable 3-43	4.48959	2.20815	5.58832	3.57061	7.88318	4.40853	17.5601	3.74442	21.496	22.1823	3.57306	1.41849	3.41576	1.73888	2.85525	2.74243	4.85086	1.61657	3.61359	1.13266	8.98183	2.79379	10.2248	2.9	5.28796	4.86911	15.2059	11.9591	5.5489	4.28055	NA	NA	NA	NA	NA	NA	NA	NA	NA	NA	9.30605	2.86185	3.43707	1.71232	2.61735	1.51068	5.59208
A0A0B4J1Y9	IGHV3-72	Immunoglobulin heavy variable 3-72	3.91462	1.6952	2.65054	1.61571	3.39703	1.78993	5.71336	2.04601	9.82991	2.51779	16.3839	3.75218	10.9614	7.24005	8.94641	5.32572	23.2765	6.50444	14.5731	3.91188	7.59973	1.99864	9.38832	3.32839	5.37303	3.53405	15.1332	14.3727	6.19628	4.55902	20.2154	3.63657	10.4721	3.23742	10.3243	4.68066	10.9493	4.77863	9.99578	2.35312	NA	NA	NA	NA	NA	NA	NA
A0A0B4J2A2	PPIAL4C	Peptidyl-prolyl cis-trans isomerase A-like 4C	0.680954	0.697535	0.39042	1.09335	0.533742	0.729906	0.507492	0.87064	0.582741	1.07838	0.699847	0.995288	0.451798	0.961144	0.41058	1.00757	0.563645	1.04238	0.544965	0.967618	0.863198	1.26606	0.827514	1.14136	0.839924	0.940204	0.749591	1.02225	0.885126	1.11682	0.679177	1.03488	0.584653	1.06647	0.529936	0.892145	0.734823	1.60412	0.539551	0.986808	0.72049	0.954087	0.518892	1.20885	0.68548	1.20393	0.66362
A0A0B4J2D5	GATD3B	Glutamine amidotransferase-like class 1 domain-containing protein 3B, mitochondrial	1.08428	1.07642	0.585078	0.739757	0.796111	0.618525	0.599317	0.643146	0.809382	1.29466	0.630277	0.926375	0.59657	0.804278	0.593661	1.64911	0.678048	1.07253	0.704252	1.28669	0.952093	1.26714	0.908863	1.48573	1.54763	0.940525	0.781657	1.13969	0.810484	0.905573	0.77682	0.598832	0.876688	0.958827	0.571659	1.3711	1.09162	1.77342	0.843302	1.83659	0.973552	1.32531	0.923029	1.70356	0.896059	1.00518	0.922032
A0A0B4J2D9	IGKV1D-13	Immunoglobulin kappa variable 1D-13	5.65265	4.0421	5.0907	3.20061	7.8378	3.5187	10.9979	4.60809	5.83576	3.53612	4.16949	2.28355	4.82229	3.84483	2.84157	1.53659	5.94463	1.82789	8.75362	3.4469	4.95119	2.05026	6.8344	2.22883	26.7023	21.0901	4.40321	3.04577	3.40304	1.94613	NA	NA	NA	NA	NA	NA	NA	NA	NA	NA	5.0403	2.66633	20.9992	29.3827	0.856478	1.02725	1.66424
A0A0B4J2F2	SIK1B	Probable serine/threonine-protein kinase SIK1B	NA	NA	NA	NA	NA	NA	NA	NA	NA	NA	NA	NA	NA	NA	NA	NA	NA	NA	NA	NA	NA	NA	NA	NA	NA	NA	NA	NA	NA	NA	NA	NA	NA	NA	NA	NA	NA	NA	NA	NA	NA	NA	NA	NA	NA	NA	NA
A0A0B4J2H0	IGHV1-69D	Immunoglobulin heavy variable 1-69D	NA	NA	NA	NA	NA	NA	NA	NA	NA	NA	NA	NA	NA	NA	NA	NA	NA	NA	NA	NA	NA	NA	NA	NA	NA	NA	NA	NA	NA	NA	NA	NA	NA	NA	NA	NA	NA	NA	NA	NA	NA	NA	NA	NA	NA	NA	NA
A0A0C4DH25	IGKV3D-20	Immunoglobulin kappa variable 3D-20	4.67951	2.25334	3.52147	2.27519	4.26041	2.39612	9.0501	2.98964	10.2759	4.09098	12.3273	3.2806	7.1341	5.50601	6.09849	5.57519	20.7484	5.11356	9.35616	2.6975	6.10827	1.9074	7.76405	2.07724	5.44644	5.02273	11.176	7.10244	4.36863	2.82606	3.60323	1.33381	2.08876	1.32847	1.89017	1.25929	2.94833	1.40847	1.3501	0.871142	5.12186	2.20447	3.57496	2.52222	2.45793	1.56058	3.2304
A0A0C4DH29	IGHV1-3	Immunoglobulin heavy variable 1-3	1.9698	1.16105	3.63481	2.06544	2.49685	3.11323	2.72284	1.35851	11.6898	6.68256	5.53374	1.59513	5.30433	5.02436	3.41181	2.14893	6.96574	1.79544	5.14502	1.59022	4.03724	1.31277	3.71915	1.42661	3.44231	2.59141	6.23657	4.30394	2.70186	1.61723	13.4167	2.91864	6.14374	2.45748	5.30972	2.14834	6.18873	1.80416	5.51476	1.66302	67.5953	18.7648	31.0396	15.7317	18.424	6.90156	32.9533
A0A0C4DH31	IGHV1-18	Immunoglobulin heavy variable 1-18	6.18279	2.52499	4.3503	2.25279	5.90259	3.39581	15.9548	2.91833	26.4148	7.82377	7.43593	2.04426	6.24249	2.01899	4.56941	2.83999	9.9413	2.28549	6.41686	1.62364	24.7601	4.33874	24.1143	3.60956	14.0116	11.0482	25.7075	16.3671	11.4412	6.13973	13.3409	2.41944	7.05301	1.98365	10.2067	2.55716	10.7582	1.63766	5.30011	1.4619	12.9052	4.42859	6.30435	3.63059	4.37691	1.64029	6.09143
A0A0C4DH32	IGHV3-20	Immunoglobulin heavy variable 3-20	NA	NA	NA	NA	NA	NA	NA	NA	NA	NA	2.3071	1.20165	1.58522	2.7265	1.83186	2.00503	1.87473	1.18407	1.35756	0.833633	1.57218	1.04983	2.18606	1.32026	1.74975	2.52442	2.42048	2.44704	1.85113	1.37145	3.00547	1.74441	1.91536	1.17108	1.90454	1.17996	2.45863	0.983345	2.4263	1.13248	2.29201	1.17193	1.09261	1.02932	1.50958	1.50631	1.91536
A0A0C4DH33	IGHV1-24	Immunoglobulin heavy variable 1-24	NA	NA	NA	NA	NA	NA	NA	NA	NA	NA	NA	NA	NA	NA	NA	NA	NA	NA	NA	NA	NA	NA	NA	NA	NA	NA	NA	NA	NA	NA	NA	NA	NA	NA	NA	NA	NA	NA	NA	NA	NA	NA	NA	NA	NA	NA	NA
A0A0C4DH34	IGHV4-28	Immunoglobulin heavy variable 4-28	6.95606	3.31066	2.79063	2.211	5.79528	3.13993	15.9501	2.99412	8.74763	3.43846	5.44646	1.48255	2.3084	1.21102	1.76071	1.2606	5.73509	1.37977	3.94099	1.12151	3.47831	0.859936	4.03167	1.4755	2.45953	2.64301	6.67523	3.89247	1.76189	1.39782	9.32786	2.06284	7.78925	2.29088	4.34316	2.4213	7.7795	1.61871	3.83982	1.53566	6.5332	1.56295	2.12797	1.32737	3.26794	1.62623	2.91502
A0A0C4DH38	IGHV5-51	Immunoglobulin heavy variable 5-51	10.6195	4.31968	7.72129	3.58646	9.21241	5.19619	15.0935	5.09316	23.2826	5.8664	2.98224	1.1214	3.40984	3.72971	2.12484	2.7966	5.32013	1.68713	4.26082	1.5118	8.6353	2.14804	9.09885	2.29897	5.38809	4.27316	6.64017	4.73599	3.93708	2.87945	16.3601	3.36827	8.21094	1.96788	3.16659	1.78459	10.0207	1.93329	4.339	1.53568	10.1679	2.24502	7.55322	3.04187	3.65759	1.77546	3.08965
A0A0C4DH41	IGHV4-61	Immunoglobulin heavy variable 4-61	5.47266	2.19293	3.49755	2.74595	5.2003	3.48342	9.2405	2.51875	19.0405	8.99366	3.05837	0.993082	1.48973	1.25516	1.2757	1.40369	4.73587	1.2463	2.34553	0.929683	4.63046	1.71762	4.77239	1.76977	2.77465	2.43158	5.45013	4.06781	1.98362	1.69462	4.19647	1.1815	2.61773	1.03202	1.82649	1.17942	4.02856	0.943351	1.76758	0.781813	3.83257	1.36644	3.35053	2.42683	1.46048	0.892291	2.31019
A0A0C4DH42	IGHV3-66	Immunoglobulin heavy variable 3-66	NA	NA	NA	NA	NA	NA	NA	NA	NA	NA	14.7852	3.91606	18.2721	81.3263	7.73227	6.22753	27.7998	4.19343	22.2421	4.29518	14.566	8.10299	20.8536	5.47776	10.6971	9.13207	24.9117	15.5114	6.20584	3.71685	NA	NA	NA	NA	NA	NA	NA	NA	NA	NA	27.5573	11.7257	17.4206	11.0969	3.67706	2.96145	8.65473
A0A0C4DH43	IGHV2-70D	Immunoglobulin heavy variable 2-70D	NA	NA	NA	NA	NA	NA	NA	NA	NA	NA	2.25135	1.14714	0.671455	1.00803	0.94455	0.957736	2.70529	1.37439	32.3696	1.44827	NA	NA	NA	NA	NA	NA	NA	NA	NA	NA	NA	NA	NA	NA	NA	NA	NA	NA	NA	NA	NA	NA	NA	NA	NA	NA	NA
A0A0C4DH55	IGKV3D-7	Immunoglobulin kappa variable 3D-7	NA	NA	NA	NA	NA	NA	NA	NA	NA	NA	NA	NA	NA	NA	NA	NA	NA	NA	NA	NA	NA	NA	NA	NA	NA	NA	NA	NA	NA	NA	NA	NA	NA	NA	NA	NA	NA	NA	NA	NA	NA	NA	NA	NA	NA	NA	NA
A0A0C4DH68	IGKV2-24	Immunoglobulin kappa variable 2-24	2.15974	1.55219	2.20826	1.59616	1.56318	1.2503	5.33074	1.69207	2.97064	1.6567	3.66069	0.969291	3.85022	1.19267	1.53307	0.719239	2.96108	0.732918	3.02914	0.864442	22.732	4.9025	9.76326	2.81782	12.3204	7.53007	18.2621	8.83843	12.876	7.26671	15.9043	3.07151	5.23773	1.67087	7.25754	2.99365	4.695	1.33439	3.5975	1.22528	3.02045	1.19203	4.66118	3.9794	1.3774	0.803322	2.48947
A0A0C4DH72	IGKV1-6	Immunoglobulin kappa variable 1-6	1.91384	1.28792	1.58693	2.09803	1.79028	1.69744	3.9646	2.31366	19.8901	2.73181	1.94267	1.06574	1.26479	2.35145	0.682617	2.44981	0.954678	0.99804	2.85986	1.2756	3.74162	1.53412	1.54476	1.44266	1.66139	0.747409	11.4336	8.04415	2.1974	1.76928	20.7402	7.55351	2.62268	1.85654	3.72036	2.03019	3.89255	1.39237	2.70403	1.42698	7.31766	2.26734	5.49242	3.42432	2.58063	2.35953	3.98494
A0A0C4DH73	IGKV1-12	Immunoglobulin kappa variable 1-12	1.91384	1.28792	1.58693	2.09803	1.79028	1.69744	3.9646	2.31366	19.8901	2.73181	1.94267	1.06574	1.26479	2.35145	0.682617	2.44981	0.954678	0.99804	2.85986	1.2756	3.74162	1.53412	1.54476	1.44266	1.66139	0.747409	11.4336	8.04415	2.1974	1.76928	20.7402	7.55351	2.62268	1.85654	3.72036	2.03019	3.89255	1.39237	2.70403	1.42698	7.31766	2.26734	5.49242	3.42432	2.58063	2.35953	3.98494
A0A0G2JMI3	IGHV1-69-2	Immunoglobulin heavy variable 1-69-2	NA	NA	NA	NA	NA	NA	NA	NA	NA	NA	NA	NA	NA	NA	NA	NA	NA	NA	NA	NA	NA	NA	NA	NA	NA	NA	NA	NA	NA	NA	NA	NA	NA	NA	NA	NA	NA	NA	NA	NA	NA	NA	NA	NA	NA	NA	NA
A0A0G2JS06	IGLV5-39	Immunoglobulin lambda variable 5-39	NA	NA	NA	NA	NA	NA	NA	NA	NA	NA	10.6276	1.67529	2.04766	1.73545	8.75657	13.4094	10.2572	1.91066	5.76203	1.157	NA	NA	NA	NA	NA	NA	NA	NA	NA	NA	NA	NA	NA	NA	NA	NA	NA	NA	NA	NA	NA	NA	NA	NA	NA	NA	NA
A0A0J9YX35	IGHV3-64D	Immunoglobulin heavy variable 3-64D	7.94497	2.70193	7.07811	3.04788	9.71631	5.27413	13.1245	3.01998	24.0751	6.41932	NA	NA	NA	NA	NA	NA	NA	NA	NA	NA	NA	NA	NA	NA	NA	NA	NA	NA	NA	NA	37.2477	4.25219	11.4756	3.93934	10.4111	4.59188	15.4545	2.47105	14.196	2.27184	45.9524	9.94496	35.8237	6.74481	20.8625	6.21506	24.2556
A0A0J9YXX1	IGHV5-10-1	Immunoglobulin heavy variable 5-10-1	10.0705	2.7981	8.11102	3.33878	11.0797	3.67429	21.3048	2.79184	11.6016	2.2828	2.62898	1.34399	2.55016	1.25498	2.34287	1.92653	21.8309	3.74862	8.78223	1.76579	31.863	4.22396	48.7019	8.966	23.5689	21.9389	7.68501	6.15749	16.6935	6.30921	102.957	6.60292	13.0172	2.80179	4.65037	1.8882	14.192	1.93225	19.1992	2.67021	6.69804	1.68712	11.2407	2.66792	6.93219	2.74719	1.74961
A0A1B0GTU1	ZC3H11B	Zinc finger CCCH domain-containing protein 11B	0.256417	0.551198	0.219984	0.478091	0.256658	0.363398	0.201895	0.332131	0.234936	0.494913	0.317745	0.419238	0.302006	0.462903	0.297272	0.649729	0.279973	0.658283	0.294155	0.461591	0.258742	0.393252	0.264632	0.382194	0.320176	0.558869	0.214373	0.306582	0.256012	0.300829	0.274567	0.184392	0.274264	0.577818	0.153754	0.320085	0.347478	0.572637	0.234749	0.45525	0.215368	0.421879	0.191955	0.663622	0.21067	0.428831	0.173539
A0A1B0GUS4	UBE2L5	Ubiquitin-conjugating enzyme E2 L5	0.578511	0.445707	0.303246	0.802196	0.366583	0.549839	0.361184	0.782024	0.395368	0.942232	0.497803	0.648155	0.287663	0.56601	0.317429	0.769907	0.371229	0.771485	0.397568	0.574145	0.576807	0.840341	0.553718	0.773068	0.628148	0.65854	0.524355	0.884573	0.645076	0.907825	0.417704	0.770323	0.426177	0.822268	0.373946	0.67018	0.480864	1.30792	0.38993	0.876381	0.428466	0.755366	0.346756	0.813237	0.416128	0.897457	0.461564
A0A5B9	TRBC2	T cell receptor beta constant 2	NA	NA	NA	NA	NA	NA	NA	NA	NA	NA	1.75668	1.50034	1.33552	3.02998	1.16925	2.11469	1.83428	1.80209	2.27313	1.10729	0.940536	1.70407	1.1615	1.50756	0.68536	1.1832	0.828091	2.78697	1.04792	1.17507	NA	NA	NA	NA	NA	NA	NA	NA	NA	NA	NA	NA	NA	NA	NA	NA	NA
A0AUZ9	KANSL1L	KAT8 regulatory NSL complex subunit 1-like protein	0.761039	1.32801	0.670094	0.753337	0.424905	0.855924	0.454064	0.906259	0.670399	1.11245	0.556974	0.582831	0.519489	0.468969	0.482044	0.596038	0.377571	0.632328	0.431731	0.432196	0.547031	0.744254	0.668112	0.875492	0.696173	0.715565	0.643073	0.891234	0.725831	0.777334	NA	NA	NA	NA	NA	NA	NA	NA	NA	NA	NA	NA	NA	NA	NA	NA	NA
A0AV96	RBM47	RNA-binding protein 47	0.808153	4.5036	1.23327	3.95563	0.644014	4.06094	1.4465	1.95591	2.11823	5.36881	0.92718	2.04269	0.749822	2.94249	0.670526	3.44213	1.22806	4.35005	1.22795	2.86819	2.2856	5.20085	1.61911	4.16305	1.01478	3.24251	1.2874	2.65876	0.872995	3.44667	1.80103	4.02673	1.77806	3.25632	1.27805	3.05911	2.96064	4.34909	1.11153	5.68859	1.74961	2.19602	1.70814	3.5906	1.50199	2.81778	1.90096
A0AVF1	TTC26	Intraflagellar transport protein 56	NA	NA	NA	NA	NA	NA	NA	NA	NA	NA	0.420297	0.366924	0.350771	0.426222	0.317457	0.27315	0.47542	0.631174	0.627318	1.17708	0.575807	0.593858	0.582771	0.679519	0.694718	0.580372	0.393509	0.425121	0.500206	0.604522	NA	NA	NA	NA	NA	NA	NA	NA	NA	NA	0.980759	0.984358	0.781455	0.789245	0.846528	0.873726	1.03511
A0AVT1	UBA6	Ubiquitin-like modifier-activating enzyme 6	0.569132	0.744295	0.397145	0.746161	0.435419	0.642897	0.488459	1.04937	0.58524	1.00154	0.532136	0.787278	0.381538	0.783376	0.394267	1.00073	0.60775	0.872942	0.517688	1.48182	0.677475	1.63256	0.650097	0.809109	0.540836	0.909833	0.518631	1.02767	0.584406	1.01182	0.691212	1.16229	0.616876	1.2406	0.461003	1.00794	0.749747	1.50759	0.525882	1.01833	0.537254	0.83585	0.466803	1.41529	0.529614	1.13117	0.6823
A0FGR8	ESYT2	Extended synaptotagmin-2	1.27113	1.47457	0.557196	1.58485	1.18181	0.941688	0.78777	0.775647	0.69652	1.20229	0.811066	0.818228	0.58732	0.872161	0.557262	0.910918	0.639392	1.00723	0.674513	1.0753	1.01192	1.06997	0.911497	1.2816	1.37321	0.932364	1.44538	1.07426	1.27941	0.868541	1.21827	1.10791	0.963316	1.12514	0.802491	1.20813	1.02786	1.33662	1.06006	1.70306	1.06897	0.987529	0.811478	1.18111	0.851519	1.06482	0.847033
A0JNW5	UHRF1BP1L	UHRF1-binding protein 1-like	0.826686	1.47836	0.528076	0.760608	0.705943	0.92685	0.635191	1.03284	0.608389	1.03172	0.318498	0.593511	0.294055	0.707854	0.315628	0.922768	0.483566	1.54105	0.765296	1.79778	0.84825	1.0042	1.11322	1.49469	1.9324	1.2303	1.36591	1.14368	1.98905	1.35406	NA	NA	NA	NA	NA	NA	NA	NA	NA	NA	NA	NA	NA	NA	NA	NA	NA
A0M8Q6	IGLC7	Immunoglobulin lambda constant 7	4.26275	1.53456	2.72063	1.79415	7.5298	1.93752	9.46534	2.80126	9.0286	2.53857	10.535	1.72005	5.22876	3.52233	10.4376	2.83085	16.3747	1.90004	10.2399	1.20665	4.14624	1.24657	9.18827	2.94441	3.6648	3.95878	4.3183	2.51196	3.53092	1.81706	22.3715	3.49337	22.46	1.97584	3.5438	2.02083	18.2394	1.76597	4.42815	1.04386	9.01717	1.75223	12.9073	1.95071	2.7053	1.92926	3.49699
A0MZ66	SHTN1	Shootin-1	0.336788	0.650963	0.327001	0.617217	0.284986	0.450698	0.336173	0.721224	0.352844	0.774872	0.353329	0.90163	0.344643	0.520314	0.323057	0.796422	0.426237	0.71772	0.380461	0.514113	0.424473	0.915075	0.38087	0.85081	0.327901	0.502073	0.296098	0.652359	0.327857	0.712149	0.372568	0.427031	0.352614	0.95957	0.226777	0.738965	0.372255	1.07383	0.236223	1.25393	0.410094	0.792121	0.391988	0.754307	0.391668	0.815656	0.463768
A0PJW6	TMEM223	Transmembrane protein 223	1.2976	1.62402	1.06011	1.29736	0.675316	0.983994	1.49273	1.01966	1.69584	1.4831	0.478048	0.812379	0.366373	0.747965	0.502098	1.02223	0.566549	0.880406	0.451589	0.797964	0.466881	0.798822	0.452422	1.07434	0.405454	0.855782	0.321647	0.817961	0.397593	0.825066	0.549106	0.928868	0.623743	0.906764	0.366157	0.843703	0.58546	1.21207	0.385238	1.15045	0.704238	0.87268	0.638214	1.12079	0.624327	1.08332	0.731953
A0PJZ3	GXYLT2	Glucoside xylosyltransferase 2	NA	NA	NA	NA	NA	NA	NA	NA	NA	NA	NA	NA	NA	NA	NA	NA	NA	NA	NA	NA	NA	NA	NA	NA	NA	NA	NA	NA	NA	NA	NA	NA	NA	NA	NA	NA	NA	NA	NA	NA	NA	NA	NA	NA	NA	NA	NA
A0PK00	TMEM120B	Transmembrane protein 120B	NA	NA	NA	NA	NA	NA	NA	NA	NA	NA	NA	NA	NA	NA	NA	NA	NA	NA	NA	NA	NA	NA	NA	NA	NA	NA	NA	NA	NA	NA	NA	NA	NA	NA	NA	NA	NA	NA	NA	NA	0.578144	1.05233	0.793013	1.0845	0.634185	0.787555	0.675342
A1A4S6	ARHGAP10	Rho GTPase-activating protein 10	NA	NA	NA	NA	NA	NA	NA	NA	NA	NA	NA	NA	NA	NA	NA	NA	NA	NA	NA	NA	NA	NA	NA	NA	NA	NA	NA	NA	NA	NA	1.01195	1.18546	1.00856	1.09173	1.22814	1.2255	1.08738	1.43104	1.34527	1.35524	NA	NA	NA	NA	NA	NA	NA
A1A5D9	BICDL2	BICD family-like cargo adapter 2	NA	NA	NA	NA	NA	NA	NA	NA	NA	NA	NA	NA	NA	NA	NA	NA	NA	NA	NA	NA	NA	NA	NA	NA	NA	NA	NA	NA	NA	NA	NA	NA	NA	NA	NA	NA	NA	NA	NA	NA	NA	NA	NA	NA	NA	NA	NA
A1IGU5	ARHGEF37	Rho guanine nucleotide exchange factor 37	NA	NA	NA	NA	NA	NA	NA	NA	NA	NA	2.11045	2.15813	1.58168	0.939294	1.19998	1.76043	1.66703	1.83797	1.55081	1.91669	1.00933	0.933857	1.33008	1.61711	1.56804	1.04079	1.68351	1.14499	2.59682	1.38026	NA	NA	NA	NA	NA	NA	NA	NA	NA	NA	NA	NA	NA	NA	NA	NA	NA
A1L020	MEX3A	RNA-binding protein MEX3A	NA	NA	NA	NA	NA	NA	NA	NA	NA	NA	NA	NA	NA	NA	NA	NA	NA	NA	NA	NA	NA	NA	NA	NA	NA	NA	NA	NA	NA	NA	1.4987	0.408718	0.949632	0.651298	0.558477	0.530558	0.783307	0.591078	0.675154	0.575414	NA	NA	NA	NA	NA	NA	NA
A1L0T0	ILVBL	Acetolactate synthase-like protein	0.747778	1.20133	0.625085	1.38271	0.752482	0.967326	0.803261	0.977902	0.940397	1.46506	0.793981	1.05927	0.556214	1.01662	0.601271	0.800911	0.763474	0.941094	0.815485	0.95273	0.906858	1.15954	0.866769	1.30725	0.850121	0.802569	0.590021	0.969838	0.852106	1.06671	0.76142	1.14113	0.655057	0.974594	0.573484	0.779984	0.810577	1.14192	0.701551	1.22686	0.777579	0.959467	0.735386	1.26325	0.61285	0.947758	0.847448
A1L157	TSPAN11	Tetraspanin-11	2.78225	2.27295	1.00576	0.864205	2.36803	0.752689	1.04152	1.87441	0.625565	1.0803	1.7887	1.05262	0.907068	0.672727	1.96609	1.18963	0.73051	1.76591	1.06633	1.29862	NA	NA	NA	NA	NA	NA	NA	NA	NA	NA	NA	NA	NA	NA	NA	NA	NA	NA	NA	NA	1.69657	0.791894	1.01121	0.404567	0.633859	0.633263	0.527894
A1L390	PLEKHG3	Pleckstrin homology domain-containing family G member 3	1.54306	1.63896	1.63577	1.15419	2.19625	1.31003	1.41515	1.73477	1.44116	1.77834	NA	NA	NA	NA	NA	NA	NA	NA	NA	NA	NA	NA	NA	NA	NA	NA	NA	NA	NA	NA	NA	NA	NA	NA	NA	NA	NA	NA	NA	NA	0.531691	1.25878	0.580709	1.62944	0.703566	1.85875	0.681359
A1L4H1	SSC5D	Soluble scavenger receptor cysteine-rich domain-containing protein SSC5D	3.4426	1.41889	1.88887	1.28823	3.41006	1.24882	2.68317	1.41314	2.40093	1.66678	5.37868	1.25887	2.27155	0.905371	2.59799	0.983374	2.97156	1.28357	2.47568	0.740643	NA	NA	NA	NA	NA	NA	NA	NA	NA	NA	2.62497	0.719274	0.977209	0.823627	1.20895	1.09978	1.89352	1.02852	1.85519	0.946209	2.89003	1.13439	1.97361	1.09363	2.73638	1.31884	1.89519
A1X283	SH3PXD2B	SH3 and PX domain-containing protein 2B	0.84462	1.1278	0.701674	0.856457	0.637636	0.766059	0.641317	1.03504	0.847355	1.39678	1.03912	1.43083	0.838248	0.902574	0.851287	1.27636	0.77225	1.10819	0.968506	1.04039	1.24401	1.40989	1.43866	1.32522	0.988145	0.984914	0.900329	1.19524	1.34239	1.29668	1.61193	0.892649	1.50592	1.44897	0.946219	1.57167	1.03558	1.11088	1.6613	1.38782	1.21971	1.1012	1.10881	1.23123	1.08088	1.95997	1.29112
A1Z1Q3	MACROD2	ADP-ribose glycohydrolase MACROD2	NA	NA	NA	NA	NA	NA	NA	NA	NA	NA	NA	NA	NA	NA	NA	NA	NA	NA	NA	NA	NA	NA	NA	NA	NA	NA	NA	NA	NA	NA	NA	NA	NA	NA	NA	NA	NA	NA	NA	NA	1.78319	0.748786	0.859828	0.388639	0.73044	0.491317	0.657247
A2A3N6	PIPSL	Putative PIP5K1A and PSMD4-like protein	0.609784	0.756324	0.310454	0.5334	0.47927	0.525011	0.433005	0.735892	0.485924	0.628865	0.309393	0.496172	0.31502	0.535966	0.27477	0.521623	0.336305	0.605649	0.396434	0.456434	0.518654	0.52874	0.560964	0.630951	0.563985	0.527798	0.529276	0.570482	0.53868	0.553753	0.439193	0.469979	0.387657	0.571201	0.477438	0.485341	0.417747	0.572638	0.446561	0.681015	0.501656	0.49006	0.453059	0.57759	0.561618	0.543076	0.432334
A2NJV5	IGKV2-29	Immunoglobulin kappa variable 2-29	NA	NA	NA	NA	NA	NA	NA	NA	NA	NA	NA	NA	NA	NA	NA	NA	NA	NA	NA	NA	1.37965	0.63892	1.51965	0.775847	1.044	1.3307	1.96976	1.4178	1.10457	0.915946	NA	NA	NA	NA	NA	NA	NA	NA	NA	NA	NA	NA	NA	NA	NA	NA	NA
A2RRP1	NBAS	Neuroblastoma-amplified sequence	0.845456	1.27703	0.750784	1.09547	0.853273	1.22463	0.926208	0.905328	1.108	1.39867	0.958568	1.39264	0.755815	1.47427	0.690088	1.44679	1.06044	1.50974	1.06603	1.34036	0.828819	0.829094	0.799069	0.823212	0.742869	0.861511	0.673741	0.996911	0.777	0.937368	0.923868	0.827864	0.909164	1.19414	0.669712	1.11801	1.14177	1.4077	0.70293	2.17949	1.00997	1.08937	0.940973	1.31759	0.786834	1.00248	0.899079
A2RTX5	TARSL2	Threonine--tRNA ligase 2, cytoplasmic	1.2177	1.86195	0.819326	1.72462	1.52012	1.16857	1.32758	1.33175	1.14732	1.33132	2.13647	1.41898	1.3728	2.83624	1.32064	2.3012	1.58321	2.19199	1.98846	1.6516	1.44098	1.18961	1.35931	1.3544	1.48839	1.4614	0.800978	0.964332	1.17313	1.39986	1.97926	3.23885	1.29334	1.76568	1.51967	1.86098	2.25302	6.16235	1.79436	3.446	2.27896	2.53145	1.84027	3.35752	2.25564	2.5196	1.86453
A2RUC4	TYW5	tRNA wybutosine-synthesizing protein 5	NA	NA	NA	NA	NA	NA	NA	NA	NA	NA	NA	NA	NA	NA	NA	NA	NA	NA	NA	NA	NA	NA	NA	NA	NA	NA	NA	NA	NA	NA	NA	NA	NA	NA	NA	NA	NA	NA	NA	NA	NA	NA	NA	NA	NA	NA	NA
A2RUS2	DENND3	DENN domain-containing protein 3	0.508473	1.11171	0.415374	0.877656	0.566476	0.91017	0.729851	1.03831	0.619864	0.896866	0.910179	1.03178	0.672331	1.35736	0.715237	1.26246	0.880596	1.21018	0.870886	0.750409	1.02077	1.25894	0.890466	0.607391	0.687819	1.10223	0.679324	1.88299	0.573803	0.973321	1.3867	1.24406	1.36865	0.940825	0.53236	0.767249	0.978063	1.07803	0.704953	0.549778	NA	NA	NA	NA	NA	NA	NA
A3KMH1	VWA8	von Willebrand factor A domain-containing protein 8	0.943074	1.53986	0.610209	0.796493	0.875377	0.640233	0.863253	0.636435	0.890988	1.1687	0.816335	1.03835	0.722524	0.700142	0.603989	1.26156	0.685678	1.45025	0.884725	1.2563	0.712018	0.88197	0.749074	0.800303	0.750876	1.28999	0.535751	1.09764	0.671141	1.37024	0.550168	0.793199	0.506911	0.846191	0.443036	0.83253	0.572508	0.828672	0.494558	0.896818	0.943684	1.14683	0.777018	1.18961	0.851936	1.07474	0.90257
A3KN83	SBNO1	Protein strawberry notch homolog 1	0.415274	0.830036	0.417306	0.832552	0.378009	0.54142	0.303287	0.642137	0.441532	1.08306	0.370683	0.629357	0.306	0.487534	0.390431	0.622728	0.280256	0.679352	0.315029	0.618997	0.153438	0.500406	0.230372	0.500865	0.143539	0.464643	0.1292	0.342482	0.117171	0.621076	0.420407	0.82184	0.508675	0.840002	0.348718	0.624435	0.410076	0.825735	0.36513	0.72018	0.486227	0.711091	0.416099	0.981151	0.445872	0.867883	0.514672
A3QJZ7	PRAMEF27	PRAME family member 27	0.700531	0.756659	2.27399	4.78599	0.593499	1.40662	0.551425	1.28532	0.700611	1.92698	0.971448	1.32752	0.96713	2.31955	0.599166	2.26099	0.693088	1.63088	1.02608	3.09972	1.73931	2.06539	2.21554	3.01169	1.6243	1.99333	1.23394	2.03899	1.52585	1.82125	1.81245	3.63647	1.5512	2.22989	1.09842	1.88385	1.6577	3.12351	1.23495	3.16657	1.34573	1.80856	1.19896	2.57258	1.1865	2.44982	1.37614
A4D1E9	GTPBP10	GTP-binding protein 10	0.442446	0.729285	0.256896	0.809216	0.402563	0.571685	0.36228	0.435927	0.352371	1.3153	0.428829	0.900889	0.262521	0.557736	0.269227	0.683492	0.375502	0.523211	0.359365	0.683754	0.376793	0.664266	0.355427	0.901626	0.381873	0.640151	0.365617	0.670033	0.466113	0.735865	0.413892	0.917016	0.328246	0.91226	0.275204	0.584525	0.353759	0.868602	0.310875	0.689565	0.394448	0.584825	0.373108	0.88255	0.34449	0.845334	0.419167
A4D1P6	WDR91	WD repeat-containing protein 91	1.49927	1.36335	0.952902	1.03443	1.48806	1.11715	2.24664	1.57731	2.15941	1.30772	1.2985	1.04131	1.10604	1.70204	0.980665	1.8708	1.25844	1.61911	1.25611	1.55046	1.27488	1.44754	1.38558	1.57057	1.59478	1.93388	1.07894	1.65141	1.35294	1.38317	1.35571	1.47415	1.07618	1.72192	0.915925	1.52079	1.3083	1.47872	1.10882	1.90245	1.22456	1.19997	1.05798	1.55593	1.18434	1.5752	1.2457
A4D1U4	LCHN	Protein LCHN	NA	NA	NA	NA	NA	NA	NA	NA	NA	NA	NA	NA	NA	NA	NA	NA	NA	NA	NA	NA	NA	NA	NA	NA	NA	NA	NA	NA	NA	NA	NA	NA	NA	NA	NA	NA	NA	NA	NA	NA	NA	NA	NA	NA	NA	NA	NA
A4D2B0	MBLAC1	Metallo-beta-lactamase domain-containing protein 1	NA	NA	NA	NA	NA	NA	NA	NA	NA	NA	NA	NA	NA	NA	NA	NA	NA	NA	NA	NA	NA	NA	NA	NA	NA	NA	NA	NA	NA	NA	NA	NA	NA	NA	NA	NA	NA	NA	NA	NA	NA	NA	NA	NA	NA	NA	NA
A4D2B8	PMS2P1	Putative postmeiotic segregation increased 2-like protein 1	0.239391	0.660567	0.330199	0.769969	0.327028	0.449004	0.322425	0.466152	0.354056	0.740331	0.222981	0.3915	0.223926	0.411	0.206741	0.483148	0.250426	0.492259	0.340556	0.420741	0.22064	0.498548	0.244149	0.480441	0.324351	0.555419	0.161773	0.461696	0.34086	0.428648	0.219105	0.385238	0.244366	0.594767	0.184238	0.336436	0.288872	0.777733	0.209727	0.460128	0.210183	0.378321	0.212655	0.445633	0.181462	0.385371	0.21336
A4D2H0	CTAGE15	cTAGE family member 15	0.497953	1.09841	0.429027	1.10869	0.30122	0.352355	0.449667	0.817998	0.33467	0.925608	1.12256	1.00122	0.694962	0.832446	0.534171	1.42649	0.867399	0.974645	0.776465	0.951176	0.638663	0.863332	0.591709	1.02654	0.518179	0.916281	0.392998	0.819215	0.426295	0.746799	0.99598	0.768319	0.753156	1.22942	0.346315	0.847027	0.724311	1.04768	0.534382	2.79561	0.420694	0.961816	0.41754	1.18081	0.533375	0.832678	0.481788
A4FU28	CTAGE9	cTAGE family member 9	0.497953	1.09841	0.429027	1.10869	0.30122	0.352355	0.449667	0.817998	0.33467	0.925608	1.12256	1.00122	0.694962	0.832446	0.534171	1.42649	0.867399	0.974645	0.776465	0.951176	0.638663	0.863332	0.591709	1.02654	0.518179	0.916281	0.392998	0.819215	0.426295	0.746799	0.99598	0.768319	0.753156	1.22942	0.346315	0.847027	0.724311	1.04768	0.534382	2.79561	0.420694	0.961816	0.41754	1.18081	0.533375	0.832678	0.481788
A4QPH2	PI4KAP2	Putative phosphatidylinositol 4-kinase alpha-like protein P2	1.02422	1.60475	0.650585	1.12929	0.989627	1.03743	0.88043	1.02155	0.997468	1.31165	1.12468	1.21819	0.79842	1.08995	0.879377	1.39965	1.06639	1.27565	0.997082	1.21803	0.910135	1.16694	1.00193	1.1956	1.08424	1.07451	0.939222	1.23261	1.36854	1.07343	0.963079	1.07353	0.795765	1.22545	0.757339	1.18728	0.888975	1.21496	0.805061	1.10112	0.848655	1.09507	0.78858	1.4622	0.811716	1.20387	0.958141
A5PLL7	TMEM189	Transmembrane protein 189	0.359019	1.75993	0.338145	1.05461	0.394389	1.28453	0.384056	2.24803	0.392126	1.35249	NA	NA	NA	NA	NA	NA	NA	NA	NA	NA	0.418353	0.73748	0.571687	0.860178	0.507914	0.81958	0.298877	0.760404	0.528147	1.23193	NA	NA	NA	NA	NA	NA	NA	NA	NA	NA	NA	NA	NA	NA	NA	NA	NA
A5PLN9	TRAPPC13	Trafficking protein particle complex subunit 13	0.628947	1.02576	0.463862	1.11021	0.668151	0.814292	0.604688	1.14855	0.524145	1.07559	0.840533	1.0128	0.810923	0.912464	0.505567	0.929525	0.660201	1.05196	0.777361	1.03678	0.546007	0.681666	0.651576	0.834146	0.628611	0.846862	0.376246	0.835243	0.547416	0.81869	NA	NA	NA	NA	NA	NA	NA	NA	NA	NA	0.795786	0.999143	0.746188	1.39657	0.697447	1.18704	0.812361
A5YKK6	CNOT1	CCR4-NOT transcription complex subunit 1	0.573938	1.03936	0.40478	1.0661	0.621791	0.757777	0.631255	0.741907	0.61621	1.11327	0.500799	0.771616	0.392845	0.682996	0.383966	0.851222	0.520905	0.878494	0.572943	0.926065	0.576132	0.944799	0.550951	0.950617	0.599007	0.869022	0.449908	0.848659	0.593856	0.936001	0.578375	0.874762	0.481416	1.02797	0.451277	0.785959	0.657893	1.11945	0.452679	0.994359	0.387116	0.728037	0.377012	0.901214	0.408153	0.827757	0.455876
A5YM69	ARHGEF35	Rho guanine nucleotide exchange factor 35	NA	NA	NA	NA	NA	NA	NA	NA	NA	NA	NA	NA	NA	NA	NA	NA	NA	NA	NA	NA	NA	NA	NA	NA	NA	NA	NA	NA	NA	NA	0.152891	0.170712	0.167047	0.608713	0.0952632	0.298416	0.156336	0.363643	0.122674	0.518067	0.621338	1.31258	0.748044	2.63551	0.607925	1.97762	0.894641
A5YM72	CARNS1	Carnosine synthase 1	0.726921	0.797023	0.444556	1.02622	0.753369	0.656637	0.564412	0.717134	0.62937	1.0478	0.707863	0.81754	0.542058	0.815695	0.558817	1.54327	0.698693	0.812322	0.696638	1.20133	0.692512	0.915109	0.700827	0.963951	0.815598	0.921689	0.562617	0.787682	0.801435	0.863709	0.735528	0.975957	0.615272	0.4601	0.601326	1.25961	0.800395	1.01086	0.628005	1.11754	0.527409	0.847509	0.564565	0.913931	0.509543	0.793047	0.534942
A6NC98	CCDC88B	Coiled-coil domain-containing protein 88B	NA	NA	NA	NA	NA	NA	NA	NA	NA	NA	0.654595	1.06836	0.526696	1.20732	0.628278	1.44759	0.60798	1.0463	0.721098	1.34742	NA	NA	NA	NA	NA	NA	NA	NA	NA	NA	NA	NA	NA	NA	NA	NA	NA	NA	NA	NA	0.951416	2.17678	1.01332	1.93619	0.956749	1.6294	1.05647
A6NCE7	MAP1LC3B2	Microtubule-associated proteins 1A/1B light chain 3 beta 2	0.276392	0.25689	0.189088	0.263661	0.206788	0.306677	0.239216	0.167973	0.196559	0.429875	0.243648	0.160717	0.125801	0.17317	0.138436	0.156419	0.130772	0.152938	0.133503	0.0992403	0.232596	0.239939	0.186795	0.20325	0.182647	0.168821	0.300676	0.271692	0.235698	0.277396	0.359364	0.317879	0.295535	0.296467	0.243734	0.414601	0.350476	0.334743	0.332742	0.397585	0.221652	0.235714	0.118529	0.231136	0.114976	0.366478	0.191581
A6NCN2	KRT87P	Putative keratin-87 protein	NA	NA	NA	NA	NA	NA	NA	NA	NA	NA	NA	NA	NA	NA	NA	NA	NA	NA	NA	NA	NA	NA	NA	NA	NA	NA	NA	NA	NA	NA	NA	NA	NA	NA	NA	NA	NA	NA	NA	NA	2.02804	1.09121	1.57552	0.930936	0.843514	0.872991	10.6913
A6ND36	FAM83G	Protein FAM83G	NA	NA	NA	NA	NA	NA	NA	NA	NA	NA	NA	NA	NA	NA	NA	NA	NA	NA	NA	NA	NA	NA	NA	NA	NA	NA	NA	NA	NA	NA	NA	NA	NA	NA	NA	NA	NA	NA	NA	NA	0.7762	1.22619	0.909531	1.47959	0.823678	2.18901	1.18943
A6NDB9	PALM3	Paralemmin-3	NA	NA	NA	NA	NA	NA	NA	NA	NA	NA	NA	NA	NA	NA	NA	NA	NA	NA	NA	NA	NA	NA	NA	NA	NA	NA	NA	NA	NA	NA	NA	NA	NA	NA	NA	NA	NA	NA	NA	NA	NA	NA	NA	NA	NA	NA	NA
A6NDG6	PGP	Glycerol-3-phosphate phosphatase	0.190497	0.223365	0.11303	0.315827	0.112692	0.260972	0.125992	0.333615	0.130714	0.422164	0.238133	0.338411	0.199449	0.395629	0.194122	0.467178	0.215838	0.373402	0.225233	0.237691	0.282712	0.388616	0.290522	0.313522	0.183121	0.394464	0.249019	0.507483	0.31526	0.495461	0.29562	0.463571	0.239854	0.371272	0.156174	0.349081	0.3098	0.452046	0.223466	0.637833	0.239838	0.399773	0.234902	0.500171	0.234859	0.48628	0.247767
A6NDR6	MEIS3P1	Putative homeobox protein Meis3-like 1	1.88214	1.72268	1.20905	1.07007	2.14584	1.59558	1.16735	0.797938	1.7504	1.53731	0.91532	1.22446	0.663837	0.969723	0.606662	1.38173	0.723178	1.75356	0.974878	2.21683	0.994306	2.1145	1.11378	1.20467	2.35615	1.94471	0.946705	1.1627	1.70981	1.08531	0.960754	0.737234	0.68049	1.12702	0.971867	1.55669	1.10332	1.07891	1.0768	1.17865	1.05981	1.51847	0.510309	1.36178	0.980882	1.56091	0.918197
A6NDU8	C5orf51	UPF0600 protein C5orf51	0.320649	0.37878	0.230377	0.601222	0.196969	0.254913	0.19897	0.492357	0.236339	0.554997	0.149169	0.437028	0.163647	0.397164	0.169293	0.348254	0.268014	0.665282	0.17536	0.437112	0.22568	0.477178	0.179474	0.544617	0.314936	0.451206	0.190301	0.490661	0.184945	0.480692	0.198234	0.35058	0.188277	0.396376	0.123018	0.439308	0.221806	0.493661	0.177942	0.577822	0.213579	0.552074	0.190394	0.543988	0.293833	0.510205	0.244002
A6NDY0	PABPN1L	Embryonic polyadenylate-binding protein 2	0.460017	0.880005	0.334	0.923111	0.486072	0.564621	0.440003	0.772144	0.494661	1.33444	0.515159	0.770021	0.404966	0.889821	0.376723	0.887415	0.675702	0.947673	0.580233	0.779446	0.428349	0.851494	0.430299	0.899214	0.540259	0.623829	0.272209	0.701572	0.439222	0.76066	0.656416	0.865132	0.465008	0.954919	0.385456	0.799871	0.731015	1.10272	0.422857	0.993774	0.555772	0.79242	0.504631	0.996451	0.469528	1.06912	0.415498
A6NEC2	NPEPPSL1	Puromycin-sensitive aminopeptidase-like protein	0.710828	0.540144	0.419086	0.648932	0.567913	0.541974	0.497644	0.540052	0.605975	0.663617	0.509913	0.689315	0.369719	0.688665	0.394204	0.684599	0.589088	0.722525	0.494301	1.09785	0.805906	0.883413	0.688341	0.86413	0.777353	0.827053	0.67502	0.791187	0.816573	0.78271	0.781134	0.991593	0.674096	0.844135	0.576784	0.75479	0.777419	1.03812	0.611388	1.06818	0.639084	0.71493	0.497128	0.855469	0.649386	0.702284	0.739962
A6NFN3	RBFOX3	RNA binding protein fox-1 homolog 3	0.574701	0.932719	0.241723	0.355359	0.747515	0.378548	0.324715	0.436962	0.332049	0.656555	0.472299	0.586449	0.344863	0.383045	0.36021	0.540148	0.330327	0.749493	0.407351	0.577821	0.478227	0.705649	0.483726	0.63599	0.682941	0.800262	0.364272	0.545417	0.546315	0.72009	0.518081	0.593682	0.313787	0.754818	0.43355	0.558245	0.510212	0.6909	0.471969	0.551232	0.502991	0.458763	0.31959	0.505266	0.36498	0.598195	0.380031
A6NFQ2	TCAF2	TRPM8 channel-associated factor 2	0.489438	1.43093	0.562974	1.70309	0.673231	0.957181	0.742607	1.52279	0.94403	1.19316	NA	NA	NA	NA	NA	NA	NA	NA	NA	NA	NA	NA	NA	NA	NA	NA	NA	NA	NA	NA	1.03527	2.83534	1.14383	1.53012	0.956341	1.7014	1.62964	2.29153	1.03435	0.862494	1.09555	1.5763	1.17854	2.09847	1.11659	3.00614	1.68733
A6NGE4	DCAF8L1	DDB1- and CUL4-associated factor 8-like protein 1	1.06605	1.17488	0.959626	1.13568	1.07443	0.856633	1.42907	1.14941	1.44809	1.17646	0.874443	0.785442	0.730574	1.17827	0.62932	0.818587	0.960071	1.07995	1.15848	0.985954	1.02435	1.01038	1.03321	1.00632	0.936863	1.02504	0.854218	1.01812	0.8473	0.914449	0.815081	0.965369	0.815175	1.03921	0.7247	0.991212	0.938061	1.26566	0.665596	1.88949	0.90046	0.884068	0.717501	1.01358	0.708953	0.786151	0.718799
A6NGN4	PRAMEF25	PRAME family member 25	0.700531	0.756659	2.27399	4.78599	0.593499	1.40662	0.551425	1.28532	0.700611	1.92698	0.971448	1.32752	0.96713	2.31955	0.599166	2.26099	0.693088	1.63088	1.02608	3.09972	1.73931	2.06539	2.21554	3.01169	1.6243	1.99333	1.23394	2.03899	1.52585	1.82125	1.81245	3.63647	1.5512	2.22989	1.09842	1.88385	1.6577	3.12351	1.23495	3.16657	1.34573	1.80856	1.19896	2.57258	1.1865	2.44982	1.37614
A6NGU5	GGT3P	Putative glutathione hydrolase 3 proenzyme	0.985273	1.51664	0.829721	1.40138	0.804571	2.27301	1.2085	7.9606	1.46318	1.03889	0.653389	0.648605	0.399219	1.62141	0.839007	2.38806	0.615822	1.18214	0.721775	0.859654	1.80027	0.929867	1.14053	1.12474	1.41467	1.12302	0.558743	1.26193	0.687893	1.23499	NA	NA	NA	NA	NA	NA	NA	NA	NA	NA	0.842287	2.2161	0.822475	1.94114	0.816052	1.24754	0.817675
A6NHG4	DDTL	D-dopachrome decarboxylase-like protein	0.610545	0.401791	0.371838	1.04712	0.4195	0.611408	0.464747	0.606283	0.425958	0.860209	0.602902	0.84875	0.435975	0.796895	0.392872	0.90741	0.496433	0.8834	0.574426	0.772196	0.800102	0.873504	0.647204	0.975919	0.651527	1.1035	0.711163	0.747153	0.710365	1.06158	0.764774	0.943175	0.731146	1.26186	0.524519	0.943758	0.743443	1.9722	0.600594	1.86799	0.618626	1.01954	0.566867	1.18658	0.599855	1.19125	0.701234
A6NHJ4	ZNF860	Zinc finger protein 860	0.322836	0.849946	0.384646	0.526982	0.316697	0.578435	0.39691	0.248153	0.225639	0.933429	NA	NA	NA	NA	NA	NA	NA	NA	NA	NA	0.286952	0.485054	0.432544	0.496758	0.769984	0.525272	0.402036	0.396374	0.485494	0.485934	NA	NA	NA	NA	NA	NA	NA	NA	NA	NA	NA	NA	NA	NA	NA	NA	NA
A6NHL2	TUBAL3	Tubulin alpha chain-like 3	0.611709	1.22392	0.427997	1.01622	0.642712	0.770812	0.504507	0.834784	0.458719	1.00287	0.639692	0.843275	0.564319	0.655272	0.564224	0.6911	0.507742	0.616323	0.535423	0.629901	0.455623	0.61447	0.490546	0.611895	0.495767	0.886271	0.42772	0.566283	0.375476	0.60043	0.540759	0.883274	0.530127	0.847941	0.458366	0.688034	0.651168	0.811607	0.458522	0.872643	0.485847	0.534845	0.436622	0.675072	0.422176	0.702369	0.443649
A6NHQ2	FBLL1	rRNA/tRNA 2'-O-methyltransferase fibrillarin-like protein 1	0.936356	1.43574	0.67143	1.07329	1.15358	0.96753	0.849344	0.845619	0.757027	1.42879	0.434907	0.871204	0.345403	0.743667	0.395727	0.837431	0.341764	1.02444	0.562625	0.600177	NA	NA	NA	NA	NA	NA	NA	NA	NA	NA	0.680407	0.765893	0.402457	0.748623	0.452621	0.818469	0.679902	0.993141	0.540014	0.60841	0.41486	0.725252	0.332043	0.911762	0.446156	0.674277	0.366454
A6NHQ4	EPOP	Elongin BC and Polycomb repressive complex 2-associated protein	0.765252	1.77576	0.736507	1.86777	0.823749	1.52494	1.0553	2.14434	0.99741	1.57666	0.83682	1.90074	0.897887	2.71315	0.700305	2.48062	1.25809	2.0547	1.20019	1.41012	0.99992	1.18579	1.22723	1.20484	0.704357	1.35509	0.697001	1.84484	0.693464	1.37997	1.19564	1.74063	1.12763	1.28134	0.905546	1.40187	1.32089	1.50263	0.947111	1.62237	0.935775	1.61899	1.0394	2.1299	0.901046	1.5615	1.16329
A6NHR9	SMCHD1	Structural maintenance of chromosomes flexible hinge domain-containing protein 1	0.408251	1.00601	0.305335	0.925142	0.467857	0.757982	0.431542	0.612094	0.418882	1.18421	0.403807	0.668719	0.349494	0.768621	0.317873	0.945913	0.428365	1.18016	0.468893	0.58848	0.515617	1.12273	0.582257	1.24546	0.630769	0.821183	0.438462	1.05106	0.583494	0.978817	0.461065	1.01262	0.410271	0.780383	0.362416	0.754521	0.637984	1.19623	0.39487	0.666053	0.420455	0.707125	0.45841	1.20775	0.403659	0.804419	0.481379
A6NI28	ARHGAP42	Rho GTPase-activating protein 42	NA	NA	NA	NA	NA	NA	NA	NA	NA	NA	NA	NA	NA	NA	NA	NA	NA	NA	NA	NA	NA	NA	NA	NA	NA	NA	NA	NA	NA	NA	NA	NA	NA	NA	NA	NA	NA	NA	NA	NA	NA	NA	NA	NA	NA	NA	NA
A6NI72	NCF1B	Putative neutrophil cytosol factor 1B	1.38846	2.39217	0.994097	5.54861	1.13015	2.09731	1.45463	4.16167	1.16614	3.25069	0.93068	1.94844	1.06651	5.61687	1.06269	3.58189	1.24139	2.28493	1.41104	1.0221	0.729648	0.976253	0.791731	1.21195	0.553252	1.24444	0.533189	1.66792	0.473822	1.33176	1.66486	3.78212	2.07415	3.79678	0.922168	1.75822	2.59882	2.29733	0.970865	1.37271	1.59405	2.05356	1.51865	3.47182	1.27557	2.66112	1.5444
A6NIH7	UNC119B	Protein unc-119 homolog B	0.759196	0.607888	0.491983	0.671237	0.741793	0.585158	0.422146	0.615235	0.443963	0.774165	0.526186	0.571951	0.486834	0.557992	0.432907	0.569879	0.44013	0.5863	0.520907	0.592583	NA	NA	NA	NA	NA	NA	NA	NA	NA	NA	0.549056	0.637161	0.453312	0.632015	0.478726	0.529933	0.622744	0.654109	0.533385	0.676846	0.552934	0.512009	0.397551	0.527905	0.463039	0.664205	0.439409
A6NIZ1		Ras-related protein Rap-1b-like protein	1.11729	0.851819	0.53702	0.880518	0.767663	0.750972	0.701744	0.91988	0.723119	1.00518	0.895139	0.85545	0.717182	1.10365	0.813049	1.00671	0.735813	0.978585	0.821543	0.900421	0.752026	0.855032	0.900237	0.848984	0.946814	0.825228	0.880658	0.946128	1.17384	0.820426	1.07189	1.01637	0.789971	0.850658	0.769158	0.871471	0.967261	0.968561	0.783509	0.940326	0.965747	0.878462	0.744393	0.974557	0.794528	0.925174	0.707016
A6NJU9	NPIPB13	Nuclear pore complex-interacting protein family member B13	NA	NA	NA	NA	NA	NA	NA	NA	NA	NA	NA	NA	NA	NA	NA	NA	NA	NA	NA	NA	NA	NA	NA	NA	NA	NA	NA	NA	NA	NA	0.939145	0.847491	0.871351	1.61782	1.04842	1.10551	1.09584	1.93212	NA	31.2188	NA	NA	NA	NA	NA	NA	NA
A6NKH3	RPL37AP8	Putative 60S ribosomal protein L37a-like protein	0.0798405	0.180865	0.074564	0.261368	0.0684066	0.0861525	0.0532045	0.195889	0.0661544	0.142811	0.0897624	0.0947181	0.0923538	0.159527	0.0938563	0.18787	0.159294	0.152842	0.116335	0.159964	0.143344	0.187523	0.125244	0.28721	0.143127	0.349204	0.125983	0.175404	0.100179	0.256804	0.0481751	0.144071	0.0799048	0.243134	0.0461045	0.123124	0.0987097	0.12219	0.0529401	0.289174	0.131315	0.111522	0.0921438	0.2466	0.102481	0.180835	0.0944754
A6NKT7	RGPD3	RanBP2-like and GRIP domain-containing protein 3	0.300682	0.899047	0.345162	0.747706	0.491981	0.521296	0.465606	0.368355	0.364894	1.02103	0.303136	0.643438	0.228792	0.500936	0.175287	0.709711	0.301463	0.827448	0.347292	0.699829	0.303769	0.591898	0.503684	0.655539	0.505068	0.606424	0.284947	0.570273	0.514843	0.606063	0.252053	0.459879	0.18504	0.692612	0.230689	0.501684	0.289883	0.668496	0.264806	0.875461	0.207625	0.399625	0.204408	0.594309	0.243488	0.71381	0.228066
A6NMY6	ANXA2P2	Putative annexin A2-like protein	0.725591	1.06614	0.788007	0.940602	0.463218	1.12465	0.653234	1.65696	0.717177	0.794255	0.806998	0.735703	0.502198	0.653748	0.60676	0.78813	0.534907	0.815255	0.694641	1.41441	0.699871	0.7808	0.682862	1.35071	0.440603	0.659068	0.509723	0.768844	0.439957	1.03781	0.754918	1.13872	0.738574	1.18691	0.557184	0.751043	0.644383	0.963604	0.884157	0.690678	0.498428	0.670575	0.43329	0.781468	0.537747	0.831256	0.754023
A6NMZ7	COL6A6	Collagen alpha-6(VI) chain	NA	NA	NA	NA	NA	NA	NA	NA	NA	NA	NA	NA	NA	NA	NA	NA	NA	NA	NA	NA	NA	NA	NA	NA	NA	NA	NA	NA	NA	NA	NA	NA	NA	NA	NA	NA	NA	NA	NA	NA	NA	NA	NA	NA	NA	NA	NA
A6NNY8	USP27X	Ubiquitin carboxyl-terminal hydrolase 27	NA	NA	NA	NA	NA	NA	NA	NA	NA	NA	NA	NA	NA	NA	NA	NA	NA	NA	NA	NA	NA	NA	NA	NA	NA	NA	NA	NA	NA	NA	NA	NA	NA	NA	NA	NA	NA	NA	NA	NA	NA	NA	NA	NA	NA	NA	NA
A6NNZ2		Tubulin beta-8 chain-like protein LOC260334	0.490362	0.856854	0.367427	0.569382	0.42165	0.550174	0.377436	0.48422	0.378287	0.56555	0.461139	0.610561	0.454496	0.490352	0.447918	0.66939	0.433628	0.51495	0.449227	0.518604	0.553485	0.867089	0.656844	0.777021	0.621165	0.895865	0.495224	0.727342	0.595511	0.689181	0.577254	0.605283	0.605977	0.768781	0.517829	0.741016	0.708019	0.855264	0.604993	0.853385	0.588553	0.581309	0.534562	0.709767	0.540067	0.823414	0.564991
A6NP11	ZNF716	Zinc finger protein 716	0.322836	0.849946	0.384646	0.526982	0.316697	0.578435	0.39691	0.248153	0.225639	0.933429	NA	NA	NA	NA	NA	NA	NA	NA	NA	NA	0.286952	0.485054	0.432544	0.496758	0.769984	0.525272	0.402036	0.396374	0.485494	0.485934	NA	NA	NA	NA	NA	NA	NA	NA	NA	NA	NA	NA	NA	NA	NA	NA	NA
A6QL64	ANKRD36	Ankyrin repeat domain-containing protein 36A	NA	NA	NA	NA	NA	NA	NA	NA	NA	NA	NA	NA	NA	NA	NA	NA	NA	NA	NA	NA	NA	NA	NA	NA	NA	NA	NA	NA	NA	NA	NA	NA	NA	NA	NA	NA	NA	NA	NA	NA	0.975449	1.24249	1.04862	1.1326	0.942552	1.17422	1.36597
A6ZKI3	RTL8C	Retrotransposon Gag-like protein 8C	NA	NA	NA	NA	NA	NA	NA	NA	NA	NA	0.994208	0.842393	0.572893	0.718443	0.709945	0.883219	0.63437	0.802326	0.72319	0.821505	0.633904	0.708083	0.742516	0.692729	0.583801	0.695408	0.565441	0.663077	0.612745	0.74979	0.485202	0.455797	0.497349	0.708932	0.407181	0.70675	0.579421	0.577345	0.486809	0.756308	0.516525	0.441529	0.342347	0.503275	0.476154	0.597299	0.446591
A7E2V4	ZSWIM8	Zinc finger SWIM domain-containing protein 8	NA	NA	NA	NA	NA	NA	NA	NA	NA	NA	NA	NA	NA	NA	NA	NA	NA	NA	NA	NA	NA	NA	NA	NA	NA	NA	NA	NA	NA	NA	0.727922	1.17168	0.767328	1.05498	0.793355	0.840576	0.938782	1.09995	0.824386	1.0751	NA	NA	NA	NA	NA	NA	NA
A7E2Y1	MYH7B	Myosin-7B	NA	NA	NA	NA	NA	NA	NA	NA	NA	NA	NA	NA	NA	NA	NA	NA	NA	NA	NA	NA	NA	NA	NA	NA	NA	NA	NA	NA	NA	NA	NA	NA	NA	NA	NA	NA	NA	NA	NA	NA	1.56709	1.00745	1.42247	1.0531	0.794013	0.833639	0.626563
A7KAX9	ARHGAP32	Rho GTPase-activating protein 32	NA	NA	NA	NA	NA	NA	NA	NA	NA	NA	0.63397	0.736522	0.443286	0.891744	0.463023	1.00756	0.606355	1.03464	0.483131	0.989318	NA	NA	NA	NA	NA	NA	NA	NA	NA	NA	NA	NA	NA	NA	NA	NA	NA	NA	NA	NA	NA	NA	NA	NA	NA	NA	NA
A8CG34	POM121C	Nuclear envelope pore membrane protein POM 121C	0.375102	0.781234	0.331286	0.680418	0.483854	0.502354	0.344784	0.489198	0.41121	0.65253	NA	NA	NA	NA	NA	NA	NA	NA	NA	NA	NA	NA	NA	NA	NA	NA	NA	NA	NA	NA	NA	NA	NA	NA	NA	NA	NA	NA	NA	NA	0.296797	0.378727	0.291233	0.550733	0.33089	0.410189	0.350383
A8K0S8	MEIS3P2	Putative homeobox protein Meis3-like 2	1.88214	1.72268	1.20905	1.07007	2.14584	1.59558	1.16735	0.797938	1.7504	1.53731	0.91532	1.22446	0.663837	0.969723	0.606662	1.38173	0.723178	1.75356	0.974878	2.21683	0.994306	2.1145	1.11378	1.20467	2.35615	1.94471	0.946705	1.1627	1.70981	1.08531	0.960754	0.737234	0.68049	1.12702	0.971867	1.55669	1.10332	1.07891	1.0768	1.17865	1.05981	1.51847	0.510309	1.36178	0.980882	1.56091	0.918197
A8K0Z3	WASHC1	WASH complex subunit 1	0.659605	0.74891	0.5102	0.820738	0.441653	0.55118	0.419826	0.646897	0.478658	0.486063	0.561	0.820692	0.421626	0.94671	0.372579	0.937934	0.48789	0.695077	0.608611	0.769467	0.621485	0.894056	0.613263	0.645527	0.802957	0.732471	0.506255	0.710217	0.754148	0.67059	0.806265	0.48657	0.94452	1.2617	0.407124	1.04326	0.821755	1.09417	0.700014	1.55104	0.562571	0.706509	0.530671	1.13168	0.680306	0.647409	0.63904
A8K2U0	A2ML1	Alpha-2-macroglobulin-like protein 1	1.04075	1.16423	3.95461	1.02108	1.06528	5.7918	2.53928	1.9036	7.86711	1.59122	3.3736	3.18715	1.21508	2.97144	4.47876	1.83327	4.3977	1.00751	2.589	3.46397	5.73477	0.973381	4.13645	11.6266	0.964261	0.869174	0.875929	0.8699	1.0179	1.12522	1.30381	1.47562	4.02826	2.13649	6.12378	1.98289	2.9975	9.22837	0.968239	1.36798	0.865852	1.33775	2.49681	2.61688	2.37262	1.85576	3.82451
A8K7I4	CLCA1	Calcium-activated chloride channel regulator 1	NA	NA	NA	NA	NA	NA	NA	NA	NA	NA	NA	NA	NA	NA	NA	NA	NA	NA	NA	NA	NA	NA	NA	NA	NA	NA	NA	NA	NA	NA	NA	NA	NA	NA	NA	NA	NA	NA	NA	NA	NA	NA	NA	NA	NA	NA	NA
A8MRT5	NPIPB5	Nuclear pore complex-interacting protein family member B5	NA	NA	NA	NA	NA	NA	NA	NA	NA	NA	NA	NA	NA	NA	NA	NA	NA	NA	NA	NA	NA	NA	NA	NA	NA	NA	NA	NA	NA	NA	0.939145	0.847491	0.871351	1.61782	1.04842	1.10551	1.09584	1.93212	NA	31.2188	NA	NA	NA	NA	NA	NA	NA
A8MT19	RHPN2P1	Putative rhophilin-2-like protein RHPN2P1	NA	NA	NA	NA	NA	NA	NA	NA	NA	NA	NA	NA	NA	NA	NA	NA	NA	NA	NA	NA	NA	NA	NA	NA	NA	NA	NA	NA	NA	NA	NA	NA	NA	NA	NA	NA	NA	NA	NA	NA	NA	NA	NA	NA	NA	NA	NA
A8MTJ3	GNAT3	Guanine nucleotide-binding protein G(t) subunit alpha-3	0.848514	1.55031	0.607004	1.43471	0.885795	1.27653	0.812437	1.89736	1.03266	2.28467	1.15091	1.72559	0.732919	1.49442	0.796917	1.43711	0.949998	2.1154	0.945151	1.9613	0.845143	1.41667	0.889531	1.58684	0.933391	1.06159	0.75415	1.20785	0.822738	1.23519	1.03853	1.67078	0.790271	1.38173	0.746485	1.44126	0.914582	1.41434	0.751853	1.02319	0.794647	1.21041	0.790261	1.62556	0.737461	1.41734	1.07147
A8MUU1	FABP5P3	Putative fatty acid-binding protein 5-like protein 3	0.362559	0.802777	1.43633	0.732375	0.475412	7.89003	1.10042	5.52265	3.32059	0.913227	1.32704	8.05387	0.642683	0.995553	0.894404	1.73795	1.9157	0.69077	0.809473	1.92945	3.08188	6.27937	1.87865	1.69208	0.971383	6.40616	0.613324	1.01741	0.928438	2.67783	1.24444	3.16921	1.41905	7.90299	2.00429	5.08826	1.22977	4.05256	0.692723	0.805417	0.906979	2.72313	1.36832	1.47652	1.53663	5.94784	2.19754
A8MVJ9		Putative histone PARylation factor 1-like	0.457907	0.653741	0.359422	0.726089	0.36517	0.461662	0.368783	0.612879	0.412391	0.804735	0.551841	0.5175	0.361821	0.722594	0.597367	0.734068	0.736462	1.0123	0.637197	0.533928	0.591161	0.71155	0.536648	0.681151	0.528277	0.683192	0.412016	0.75811	0.45046	0.56533	0.465865	0.450769	0.373327	0.581278	0.354291	0.562435	0.510546	0.894044	0.415117	0.757789	0.404389	0.564457	0.287393	0.586403	0.368673	0.654159	0.317837
A8MVU1	NCF1C	Putative neutrophil cytosol factor 1C	1.38846	2.39217	0.994097	5.54861	1.13015	2.09731	1.45463	4.16167	1.16614	3.25069	0.93068	1.94844	1.06651	5.61687	1.06269	3.58189	1.24139	2.28493	1.41104	1.0221	0.729648	0.976253	0.791731	1.21195	0.553252	1.24444	0.533189	1.66792	0.473822	1.33176	1.66486	3.78212	2.07415	3.79678	0.922168	1.75822	2.59882	2.29733	0.970865	1.37271	1.59405	2.05356	1.51865	3.47182	1.27557	2.66112	1.5444
A8MW92	PHF20L1	PHD finger protein 20-like protein 1	NA	NA	NA	NA	NA	NA	NA	NA	NA	NA	NA	NA	NA	NA	NA	NA	NA	NA	NA	NA	NA	NA	NA	NA	NA	NA	NA	NA	NA	NA	NA	NA	NA	NA	NA	NA	NA	NA	NA	NA	NA	NA	NA	NA	NA	NA	NA
A8MWD9	SNRPGP15	Putative small nuclear ribonucleoprotein G-like protein 15	0.337955	0.920613	0.252616	1.08344	0.449901	0.61918	0.381283	0.787674	0.415993	1.00182	0.317968	0.588896	0.201957	0.579263	0.213032	0.6789	0.3249	0.891732	0.298606	0.661352	NA	NA	NA	NA	NA	NA	NA	NA	NA	NA	0.43681	0.757644	0.329134	1.02635	0.255973	0.585998	0.417391	0.822918	0.320402	0.897135	0.242348	0.624495	0.280661	0.833665	0.228615	0.775069	0.3443
A8MWX3	WASH4P	Putative WAS protein family homolog 4	0.659605	0.74891	0.5102	0.820738	0.441653	0.55118	0.419826	0.646897	0.478658	0.486063	0.561	0.820692	0.421626	0.94671	0.372579	0.937934	0.48789	0.695077	0.608611	0.769467	0.621485	0.894056	0.613263	0.645527	0.802957	0.732471	0.506255	0.710217	0.754148	0.67059	0.806265	0.48657	0.94452	1.2617	0.407124	1.04326	0.821755	1.09417	0.700014	1.55104	0.562571	0.706509	0.530671	1.13168	0.680306	0.647409	0.63904
A8MXV4	NUDT19	Nucleoside diphosphate-linked moiety X motif 19	0.380656	1.01402	0.177314	0.680736	0.346446	0.358789	0.460227	0.498243	0.395795	0.575074	0.321277	0.377965	0.305825	0.406059	0.2309	0.659734	0.380332	1.16316	0.257877	0.437075	0.407335	0.617541	0.46474	0.652761	0.372445	0.507414	0.35422	0.520522	0.267641	0.989913	0.516458	1.42621	0.70973	0.988614	0.591788	0.58977	0.537065	0.973001	0.414931	0.661977	0.407231	0.515189	0.355541	0.979025	0.36974	0.802567	0.475196
A8MZ36	EVPLL	Envoplakin-like protein	0.71778	1.69334	1.20506	1.15394	0.686486	2.10255	1.26227	1.86283	2.04474	1.4203	0.8427	2.29209	0.774325	1.67979	0.761771	2.06552	1.11548	2.03568	1.78014	4.02949	1.29664	1.69971	0.844889	3.35495	0.621053	1.00171	0.532398	0.889899	0.625715	1.9325	0.715334	2.17048	0.999353	2.35665	1.24432	2.41957	1.05313	4.4571	0.617307	1.0292	0.493732	1.1165	0.771631	2.41682	1.02671	2.05408	1.28493
A8TX70	COL6A5	Collagen alpha-5(VI) chain	NA	NA	NA	NA	NA	NA	NA	NA	NA	NA	NA	NA	NA	NA	NA	NA	NA	NA	NA	NA	NA	NA	NA	NA	NA	NA	NA	NA	NA	NA	NA	NA	NA	NA	NA	NA	NA	NA	NA	NA	NA	NA	NA	NA	NA	NA	NA
A9UHW6	MIF4GD	MIF4G domain-containing protein	NA	NA	NA	NA	NA	NA	NA	NA	NA	NA	NA	NA	NA	NA	NA	NA	NA	NA	NA	NA	NA	NA	NA	NA	NA	NA	NA	NA	NA	NA	NA	NA	NA	NA	NA	NA	NA	NA	NA	NA	NA	NA	NA	NA	NA	NA	NA
B0I1T2	MYO1G	Unconventional myosin-Ig	1.29967	2.1235	1.07778	3.66749	1.16021	2.7065	2.02967	2.71905	1.83568	2.88169	1.2363	1.99871	1.32859	3.93849	1.18892	3.33251	1.65294	2.63118	1.91062	1.1047	1.40991	3.62363	1.79569	2.54785	1.23674	2.29744	1.12234	5.60569	1.15319	2.57987	1.83174	2.45107	1.20313	1.48367	1.16352	2.27446	1.95318	2.80957	1.17313	1.27747	1.04969	2.07975	1.15834	2.6468	1.06056	1.76704	1.31447
B1AK53	ESPN	Espin	NA	NA	NA	NA	NA	NA	NA	NA	NA	NA	NA	NA	NA	NA	NA	NA	NA	NA	NA	NA	NA	NA	NA	NA	NA	NA	NA	NA	NA	NA	NA	NA	NA	NA	NA	NA	NA	NA	NA	NA	1.11924	1.8501	1.21708	2.46486	1.19295	2.16692	1.54489
B2RPK0	HMGB1P1	Putative high mobility group protein B1-like 1	0.408313	0.484311	0.301049	0.526272	0.231405	0.273324	0.22071	0.431568	0.26207	0.557101	0.19216	0.326115	0.127758	0.310591	0.118707	0.488783	0.0901817	0.536207	0.157305	0.439395	0.552465	0.763827	0.418319	0.566461	0.625208	1.24537	0.408838	0.729795	0.308077	0.585562	0.23787	0.316791	0.269331	0.599585	0.180266	0.527104	0.27597	0.489495	0.301683	0.498225	0.206092	0.327429	0.138026	0.378402	0.134121	0.388091	0.163381
B2RTY4	MYO9A	Unconventional myosin-IXa	NA	NA	NA	NA	NA	NA	NA	NA	NA	NA	1.21391	1.21969	0.953351	1.05735	0.973336	1.24404	1.13094	1.35379	1.10148	1.04219	NA	NA	NA	NA	NA	NA	NA	NA	NA	NA	NA	NA	NA	NA	NA	NA	NA	NA	NA	NA	NA	NA	NA	NA	NA	NA	NA
B2RXH8	HNRNPCL2	Heterogeneous nuclear ribonucleoprotein C-like 2	0.388839	0.885198	0.247234	0.890589	0.457174	0.623115	0.350733	0.655254	0.394949	1.0104	0.296871	0.527333	0.196276	0.491714	0.202857	0.494429	0.244914	0.73619	0.305452	0.639333	0.322963	0.486369	0.293324	0.513335	0.389779	0.429693	0.244661	0.458857	0.34248	0.46617	0.297706	0.433326	0.244723	0.499469	0.158781	0.319828	0.335062	0.579389	0.203637	0.565143	0.199024	0.372276	0.172589	0.439009	0.154641	0.425931	0.18548
B5MD39	GGTLC3	Putative glutathione hydrolase light chain 3	0.985273	1.51664	0.829721	1.40138	0.804571	2.27301	1.2085	7.9606	1.46318	1.03889	0.653389	0.648605	0.399219	1.62141	0.839007	2.38806	0.615822	1.18214	0.721775	0.859654	1.80027	0.929867	1.14053	1.12474	1.41467	1.12302	0.558743	1.26193	0.687893	1.23499	NA	NA	NA	NA	NA	NA	NA	NA	NA	NA	0.842287	2.2161	0.822475	1.94114	0.816052	1.24754	0.817675
B5ME19	EIF3CL	Eukaryotic translation initiation factor 3 subunit C-like protein	0.470837	0.942023	0.314396	0.834402	0.47328	0.581948	0.46233	0.800681	0.502639	0.993805	0.483358	0.832184	0.371877	0.707419	0.361045	0.836503	0.579345	0.783838	0.514601	0.716614	0.483718	0.767695	0.43725	0.69216	0.47264	0.713181	0.319931	0.678781	0.43123	0.820724	0.536068	0.640483	0.414343	0.819169	0.405752	0.69751	0.551717	0.896922	0.418328	0.920898	0.331684	0.549652	0.317999	0.741764	0.347314	0.714521	0.404625
B7ZAP0	RABGAP1L	Rab GTPase-activating protein 1-like, isoform 10	0.682467	1.12721	0.803335	0.962869	0.767285	2.0138	0.693137	1.35916	1.25354	1.53787	0.451343	1.48473	0.414154	1.06583	0.431956	1.19472	0.649075	1.19707	0.64464	1.31443	NA	NA	NA	NA	NA	NA	NA	NA	NA	NA	NA	NA	NA	NA	NA	NA	NA	NA	NA	NA	NA	NA	NA	NA	NA	NA	NA
B7ZAQ6	GPR89A	Golgi pH regulator A	NA	NA	NA	NA	NA	NA	NA	NA	NA	NA	NA	NA	NA	NA	NA	NA	NA	NA	NA	NA	NA	NA	NA	NA	NA	NA	NA	NA	NA	NA	NA	NA	NA	NA	NA	NA	NA	NA	NA	NA	0.390849	0.767654	0.386267	1.32475	0.389493	0.552859	0.424826
B7ZBB8	PPP1R3G	Protein phosphatase 1 regulatory subunit 3G	NA	NA	NA	NA	NA	NA	NA	NA	NA	NA	NA	NA	NA	NA	NA	NA	NA	NA	NA	NA	NA	NA	NA	NA	NA	NA	NA	NA	NA	NA	NA	NA	NA	NA	NA	NA	NA	NA	NA	NA	NA	NA	NA	NA	NA	NA	NA
B7ZW38	HNRNPCL3	Heterogeneous nuclear ribonucleoprotein C-like 3	0.388839	0.885198	0.247234	0.890589	0.457174	0.623115	0.350733	0.655254	0.394949	1.0104	0.296871	0.527333	0.196276	0.491714	0.202857	0.494429	0.244914	0.73619	0.305452	0.639333	0.322963	0.486369	0.293324	0.513335	0.389779	0.429693	0.244661	0.458857	0.34248	0.46617	0.297706	0.433326	0.244723	0.499469	0.158781	0.319828	0.335062	0.579389	0.203637	0.565143	0.199024	0.372276	0.172589	0.439009	0.154641	0.425931	0.18548
B9A064	IGLL5	Immunoglobulin lambda-like polypeptide 5	1.61899	1.20385	1.45239	1.28687	1.42559	0.748149	2.63328	1.02862	3.3742	1.4276	2.81757	1.20204	1.85507	1.33072	2.2148	1.54194	4.01711	1.24214	2.42737	1.29855	1.30721	0.766935	2.04221	0.829438	1.13714	1.27776	1.94096	1.66362	0.861868	0.74637	4.34054	1.24037	2.30837	1.32731	1.38044	0.878079	2.06564	1.04278	1.46259	1.16234	3.03692	1.26034	3.1854	1.37705	1.32814	1.11007	2.25789
C4AMC7	WASH3P	Putative WAS protein family homolog 3	0.659605	0.74891	0.5102	0.820738	0.441653	0.55118	0.419826	0.646897	0.478658	0.486063	0.561	0.820692	0.421626	0.94671	0.372579	0.937934	0.48789	0.695077	0.608611	0.769467	0.621485	0.894056	0.613263	0.645527	0.802957	0.732471	0.506255	0.710217	0.754148	0.67059	0.806265	0.48657	0.94452	1.2617	0.407124	1.04326	0.821755	1.09417	0.700014	1.55104	0.562571	0.706509	0.530671	1.13168	0.680306	0.647409	0.63904
C9J202	ALG1L2	Putative glycosyltransferase ALG1L2	1.82532	1.33364	1.25005	1.19278	0.724173	1.02036	0.621474	1.01079	0.73767	1.2833	0.684692	1.04159	0.516649	1.23412	0.623542	1.41135	0.82203	1.39687	0.684581	0.97837	0.635026	0.712917	0.583771	0.739769	0.55665	0.783814	0.464068	0.954314	0.555493	0.832324	0.740037	0.896073	0.728299	0.940822	0.889037	0.868057	0.88881	1.05302	0.669704	1.25358	0.506201	0.851896	0.542942	0.897059	0.497619	0.82196	0.567665
C9J798	RASA4B	Ras GTPase-activating protein 4B	2.82292	1.22633	1.74833	1.42519	1.69202	1.21926	2.40807	1.75502	2.82166	2.14473	1.553	0.890258	1.04753	0.841271	1.36213	0.969772	0.979648	0.984217	1.37687	0.762449	1.24166	1.00468	1.06526	0.716537	1.36817	1.20502	0.996391	1.06215	1.48263	0.974405	2.96339	1.31529	2.23968	1.47458	2.38713	2.24429	2.75321	1.874	2.39082	1.11798	NA	NA	NA	NA	NA	NA	NA
C9J7I0	UMAD1	UBAP1-MVB12-associated (UMA)-domain containing protein 1	NA	NA	NA	NA	NA	NA	NA	NA	NA	NA	NA	NA	NA	NA	NA	NA	NA	NA	NA	NA	NA	NA	NA	NA	NA	NA	NA	NA	NA	NA	NA	NA	NA	NA	NA	NA	NA	NA	NA	NA	NA	NA	NA	NA	NA	NA	NA
C9JG80	NPIPB4	Nuclear pore complex-interacting protein family member B4	NA	NA	NA	NA	NA	NA	NA	NA	NA	NA	NA	NA	NA	NA	NA	NA	NA	NA	NA	NA	NA	NA	NA	NA	NA	NA	NA	NA	NA	NA	0.939145	0.847491	0.871351	1.61782	1.04842	1.10551	1.09584	1.93212	NA	31.2188	NA	NA	NA	NA	NA	NA	NA
C9JLW8	MCRIP1	Mapk-regulated corepressor-interacting protein 1	NA	NA	NA	NA	NA	NA	NA	NA	NA	NA	NA	NA	NA	NA	NA	NA	NA	NA	NA	NA	NA	NA	NA	NA	NA	NA	NA	NA	NA	NA	NA	NA	NA	NA	NA	NA	NA	NA	NA	NA	NA	NA	NA	NA	NA	NA	NA
C9JN71	ZNF878	Zinc finger protein 878	0.322836	0.849946	0.384646	0.526982	0.316697	0.578435	0.39691	0.248153	0.225639	0.933429	NA	NA	NA	NA	NA	NA	NA	NA	NA	NA	0.286952	0.485054	0.432544	0.496758	0.769984	0.525272	0.402036	0.396374	0.485494	0.485934	NA	NA	NA	NA	NA	NA	NA	NA	NA	NA	NA	NA	NA	NA	NA	NA	NA
C9JRZ8	AKR1B15	Aldo-keto reductase family 1 member B15	NA	NA	NA	NA	NA	NA	NA	NA	NA	NA	NA	NA	NA	NA	NA	NA	NA	NA	NA	NA	NA	NA	NA	NA	NA	NA	NA	NA	NA	NA	NA	NA	NA	NA	NA	NA	NA	NA	NA	NA	NA	NA	NA	NA	NA	NA	NA
E5RHQ5	NPIPB11	Nuclear pore complex-interacting protein family member B11	NA	NA	NA	NA	NA	NA	NA	NA	NA	NA	NA	NA	NA	NA	NA	NA	NA	NA	NA	NA	NA	NA	NA	NA	NA	NA	NA	NA	NA	NA	0.939145	0.847491	0.871351	1.61782	1.04842	1.10551	1.09584	1.93212	NA	31.2188	NA	NA	NA	NA	NA	NA	NA
E7ETH6	ZNF587B	Zinc finger protein 587B	5.91561	2.04458	5.75299	2.12404	6.56477	1.62574	6.99997	2.77094	6.35909	3.316	NA	NA	NA	NA	NA	NA	NA	NA	NA	NA	NA	NA	NA	NA	NA	NA	NA	NA	NA	NA	NA	NA	NA	NA	NA	NA	NA	NA	NA	NA	NA	NA	NA	NA	NA	NA	NA
E7EU14	PPP5D1	Protein PPP5D1	0.364828	0.508364	0.188507	0.624455	0.321175	0.367847	0.214862	0.425854	0.254481	0.665315	0.327116	0.441929	0.252108	0.640935	0.292438	0.607307	0.366344	0.541817	0.3612	0.620359	0.40726	0.513196	0.442533	0.467531	0.516449	0.5385	0.48653	0.588368	0.645503	0.67501	0.536171	0.5553	0.467695	0.712928	0.512912	0.715207	0.594514	0.89522	0.561853	0.812458	0.389377	0.536465	0.324583	0.643606	0.354873	0.620866	0.382997
E9PAV3	NACA	Nascent polypeptide-associated complex subunit alpha, muscle-specific form	0.254745	0.751349	0.226769	0.820454	0.198469	0.485877	0.275785	0.77385	0.531577	0.718026	0.319274	0.607577	0.234881	0.548676	0.285723	0.595695	0.41904	0.664702	0.392376	0.753592	0.446723	0.678418	0.392399	0.866576	0.319196	0.745064	0.233452	0.559292	0.294991	0.825921	0.45815	0.669103	0.344153	0.720177	0.371362	0.469893	0.484421	0.78888	0.249103	0.727123	0.313225	0.514065	0.306597	0.725651	0.355836	0.742674	0.59096
E9PIF3	NPIPA2	Nuclear pore complex-interacting protein family member A2	NA	NA	NA	NA	NA	NA	NA	NA	NA	NA	NA	NA	NA	NA	NA	NA	NA	NA	NA	NA	NA	NA	NA	NA	NA	NA	NA	NA	NA	NA	0.939145	0.847491	0.871351	1.61782	1.04842	1.10551	1.09584	1.93212	NA	31.2188	NA	NA	NA	NA	NA	NA	NA
E9PJ23	NPIPB6	Nuclear pore complex-interacting protein family member B6	NA	NA	NA	NA	NA	NA	NA	NA	NA	NA	NA	NA	NA	NA	NA	NA	NA	NA	NA	NA	NA	NA	NA	NA	NA	NA	NA	NA	NA	NA	0.939145	0.847491	0.871351	1.61782	1.04842	1.10551	1.09584	1.93212	NA	31.2188	NA	NA	NA	NA	NA	NA	NA
E9PQ53	NDUFC2-KCTD14	NADH dehydrogenase [ubiquinone] 1 subunit C2, isoform 2	0.541989	1.01646	0.419227	1.18777	0.421982	0.641244	0.44958	0.577316	0.611195	0.978078	0.649427	0.704164	0.447445	0.84782	0.552433	0.994249	0.638618	1.4992	0.560101	1.21467	0.787576	0.898855	0.840354	1.16044	0.864865	1.00748	0.890203	1.07443	0.842836	1.1632	0.65893	0.534739	0.687252	0.804665	0.472644	0.854227	0.800348	1.01632	0.516754	1.18769	0.609744	0.958986	0.439118	0.924349	0.65789	0.94416	0.544357
E9PQR5	NPIPB8	Nuclear pore complex-interacting protein family member B8	NA	NA	NA	NA	NA	NA	NA	NA	NA	NA	NA	NA	NA	NA	NA	NA	NA	NA	NA	NA	NA	NA	NA	NA	NA	NA	NA	NA	NA	NA	0.939145	0.847491	0.871351	1.61782	1.04842	1.10551	1.09584	1.93212	NA	31.2188	NA	NA	NA	NA	NA	NA	NA
E9PRG8	C11orf98	Uncharacterized protein C11orf98	NA	NA	NA	NA	NA	NA	NA	NA	NA	NA	NA	NA	NA	NA	NA	NA	NA	NA	NA	NA	0.249526	0.225114	0.275777	0.191528	0.338817	0.245716	0.338552	0.210652	0.368688	0.188687	0.191436	0.109762	0.144952	0.172435	0.150257	0.147435	0.185771	0.168419	0.142197	0.129922	0.188053	0.156085	0.210315	0.161199	0.187987	0.173508	0.252786
F5H284	PPIAL4D	Peptidyl-prolyl cis-trans isomerase A-like 4D	0.680954	0.697535	0.39042	1.09335	0.533742	0.729906	0.507492	0.87064	0.582741	1.07838	0.699847	0.995288	0.451798	0.961144	0.41058	1.00757	0.563645	1.04238	0.544965	0.967618	0.863198	1.26606	0.827514	1.14136	0.839924	0.940204	0.749591	1.02225	0.885126	1.11682	0.679177	1.03488	0.584653	1.06647	0.529936	0.892145	0.734823	1.60412	0.539551	0.986808	0.72049	0.954087	0.518892	1.20885	0.68548	1.20393	0.66362
G2XKQ0	SUMO1P1	Small ubiquitin-related modifier 5	0.150108	0.317506	0.207259	0.373632	0.185485	0.319037	0.197924	0.417438	0.281149	0.951667	0.267945	0.446423	0.258684	0.471922	0.282455	0.511855	0.316035	0.518999	0.281204	0.47942	0.391276	0.575173	0.380339	0.51575	0.38732	0.427831	0.279368	0.684987	0.365806	0.85306	0.264312	0.517064	0.274558	0.809797	0.215107	0.669211	0.345711	0.80246	0.226572	0.717234	0.212954	0.447974	0.198166	0.877831	0.240851	0.615971	0.23774
H0Y7S4	PRAMEF26	Putative PRAME family member 26	0.700531	0.756659	2.27399	4.78599	0.593499	1.40662	0.551425	1.28532	0.700611	1.92698	0.971448	1.32752	0.96713	2.31955	0.599166	2.26099	0.693088	1.63088	1.02608	3.09972	1.73931	2.06539	2.21554	3.01169	1.6243	1.99333	1.23394	2.03899	1.52585	1.82125	1.81245	3.63647	1.5512	2.22989	1.09842	1.88385	1.6577	3.12351	1.23495	3.16657	1.34573	1.80856	1.19896	2.57258	1.1865	2.44982	1.37614
L0R6Q1	SLC35A4	SLC35A4 upstream open reading frame protein	NA	NA	NA	NA	NA	NA	NA	NA	NA	NA	0.616269	0.672848	0.452693	0.796922	0.600596	0.800002	0.766292	1.14413	0.592822	0.849004	0.298882	0.66264	0.38439	0.999858	0.528668	0.365537	0.274843	0.671511	0.362479	0.806003	0.392071	0.540932	0.360354	0.456863	0.359219	0.49528	0.402732	0.613639	0.327004	0.685703	0.637219	0.839015	0.536255	0.974628	0.455583	0.936635	0.549662
O00115	DNASE2	Deoxyribonuclease-2-alpha	0.364768	0.831845	0.21046	0.649949	0.325942	0.940208	0.328339	0.610414	0.337127	1.46504	0.362103	0.637082	0.311913	0.882607	0.303879	0.964991	0.332519	0.744701	0.392428	0.6528	0.523256	1.06954	0.526908	0.975957	0.498423	0.731017	0.434101	1.4283	0.467274	0.976515	0.395248	0.831906	0.432836	0.914182	0.304217	0.901252	0.501837	0.976116	0.301935	0.956844	0.603831	1.0279	0.560627	1.42829	0.552602	1.27301	0.747904
O00116	AGPS	Alkyldihydroxyacetonephosphate synthase, peroxisomal	0.403257	1.39399	0.261358	1.02099	0.337655	0.60914	0.334563	0.865562	0.380449	0.991248	0.253673	0.647778	0.208749	0.454965	0.205079	0.410981	0.276982	0.505432	0.270617	0.494154	0.385074	0.609163	0.454179	0.868622	0.347238	0.587034	0.31805	0.633543	0.34984	0.82999	0.294853	0.671881	0.292571	0.851599	0.208141	0.531843	0.375531	0.713195	0.222565	0.833774	0.285482	0.450542	0.262289	0.609135	0.267957	0.64784	0.34063
O00139	KIF2A	Kinesin-like protein KIF2A	0.31248	0.826339	0.234539	0.612698	0.3064	0.521757	0.308127	0.561254	0.297549	0.582904	0.21333	0.52415	0.237197	0.598635	0.206166	0.754448	0.233633	0.615401	0.276216	0.489015	0.397238	0.694869	0.375088	0.593346	0.364783	0.5076	0.329009	0.534158	0.291546	0.522576	0.298387	0.519789	0.268989	0.744768	0.249187	0.564692	0.325413	0.948712	0.2553	0.85797	0.290107	0.678253	0.292941	0.89557	0.262882	0.68403	0.286637
O00142	TK2	Thymidine kinase 2, mitochondrial	1.42799	1.60668	0.621933	1.39113	1.64142	1.48595	1.49709	1.40482	1.5791	2.55196	1.81996	1.55776	0.998069	2.09247	1.11157	1.63552	1.45765	2.49671	1.6637	2.90753	1.2103	1.07558	1.26681	1.69013	1.40206	1.07197	1.09192	1.61253	1.29502	1.33922	1.69223	1.71182	1.23655	1.27367	1.14912	1.6681	1.93391	1.70056	1.1052	4.43585	1.18134	1.71304	1.37763	2.10605	1.22311	1.51119	1.45298
O00148	DDX39A	ATP-dependent RNA helicase DDX39A	0.167081	0.396321	0.151186	0.855551	0.152915	0.475025	0.184677	0.354834	0.194304	0.767317	0.29216	0.571199	0.317149	0.635841	0.289537	0.685471	0.310553	0.600932	0.328158	0.464931	0.235976	0.612048	0.22231	0.417951	0.207717	0.486328	0.156039	0.4998	0.167794	0.60225	0.217298	0.448223	0.185655	0.539012	0.168402	0.6242	0.292494	0.824624	0.131566	0.386864	0.31367	0.525317	0.318409	0.898546	0.305362	0.757455	0.357403
O00151	PDLIM1	PDZ and LIM domain protein 1	1.61024	2.41207	1.51474	1.72246	0.72136	1.02561	0.667224	1.52131	1.24566	1.39978	0.633126	3.05634	1.41603	0.679661	0.700888	3.15078	0.899859	1.40561	1.04567	4.03817	1.02812	3.45262	1.41626	2.32395	1.52539	2.347	1.29747	1.37696	1.12491	3.50806	1.54927	1.57552	2.0793	5.30147	0.617967	2.85737	1.31276	2.96208	0.863833	2.26978	1.11673	2.42888	0.998493	2.12524	1.36102	2.2515	1.72543
O00154	ACOT7	Cytosolic acyl coenzyme A thioester hydrolase	0.18586	0.339777	0.173066	0.660832	0.195183	0.499299	0.171968	0.432855	0.184202	0.578802	0.326766	0.368086	0.249783	0.370745	0.26118	0.42732	0.322847	0.455501	0.285189	0.281204	0.241188	0.614542	0.238784	0.381433	0.205227	0.389196	0.192886	0.511705	0.195437	0.536604	0.326499	0.519706	0.272827	0.448491	0.283634	0.434937	0.336253	0.536393	0.228736	0.470491	0.310285	0.456791	0.270635	0.413964	0.238184	0.732105	0.266586
O00159	MYO1C	Unconventional myosin-Ic	1.99959	1.3506	1.31973	0.651623	1.53939	0.690533	1.119	0.946288	1.09743	0.819387	1.35175	0.844583	1.23903	0.635532	1.08977	0.851279	0.852322	0.851817	1.34946	0.664771	1.44673	0.752713	1.62003	0.77704	2.00421	0.719388	1.29617	1.06178	2.11214	0.849905	1.37949	0.674203	0.948767	1.02598	1.72297	1.26043	0.909501	0.760493	1.77787	0.961996	1.33066	0.86839	1.13473	0.79519	1.0464	0.78055	1.26111
O00160	MYO1F	Unconventional myosin-If	1.39524	2.92201	1.17031	3.80288	1.26702	2.99657	1.97008	3.53335	1.65192	3.05142	1.54588	3.19541	1.71456	6.25831	1.60394	4.19007	2.01443	3.49781	1.8329	1.28847	1.4427	2.60224	1.94951	2.29184	1.45706	2.67958	1.3084	3.78726	1.12619	2.41874	1.61292	2.36956	1.73226	3.90905	1.03375	2.96693	2.00391	4.16839	1.0434	1.75862	1.30918	3.68839	1.311	4.29691	1.3565	3.24028	1.65776
O00161	SNAP23	Synaptosomal-associated protein 23	0.621696	1.00769	0.331928	0.928588	0.412129	0.96864	0.423804	1.00396	0.458797	0.92382	0.545822	0.713678	0.449239	1.26202	0.469897	0.89509	0.670452	1.10588	0.621386	0.851395	0.455965	0.727873	0.440213	1.09351	0.476582	0.601081	0.398102	0.867824	0.471677	0.721612	0.649029	0.815049	0.60623	0.877796	0.327473	0.808098	0.69046	1.24428	0.461934	1.02879	0.500794	0.768018	0.476859	1.18782	0.451864	0.708614	0.475838
O00165	HAX1	HCLS1-associated protein X-1	0.44139	0.88728	0.332203	1.03954	0.32596	0.407965	0.364346	0.757197	0.430916	0.804155	0.475553	0.723804	0.332829	0.801109	0.431678	0.861378	0.644899	0.93845	0.505361	0.793064	0.437158	0.610969	0.475798	0.654179	0.427048	0.680337	0.363998	0.605948	0.422668	0.556004	0.404502	0.609018	0.321616	0.625499	0.307407	0.547005	0.384084	0.750172	0.390527	0.845477	0.495862	0.588355	0.336771	0.674929	0.335584	0.443518	0.434352
O00170	AIP	AH receptor-interacting protein	0.489353	0.63055	0.339161	0.993424	0.448017	0.693111	0.397982	0.644398	0.354419	0.909951	0.297449	0.517846	0.288462	0.745502	0.292966	0.832446	0.310089	0.55212	0.355151	0.495777	0.504814	1.04317	0.380096	0.745659	0.471404	0.495438	0.337006	1.00488	0.517097	0.916146	0.518832	1.25002	0.456193	0.963522	0.409701	0.913109	0.583442	1.03571	0.485129	0.73424	0.65679	0.870629	0.404	1.15872	0.963935	0.981916	0.719369
O00178	GTPBP1	GTP-binding protein 1	0.637189	1.19715	0.370093	0.802952	0.536412	0.802103	0.547058	0.870453	0.516655	0.883091	0.47071	0.794792	0.407571	0.888128	0.415705	1.02229	0.559084	0.921649	0.51229	0.924974	0.609075	1.05924	0.47838	0.787812	0.555322	0.773127	0.408027	0.935045	0.513117	0.940003	0.54834	0.790593	0.452052	0.874127	0.358895	0.782765	0.565595	1.46422	0.483234	0.902668	0.470487	0.80969	0.450963	1.10727	0.406322	0.84626	0.430649
O00180	KCNK1	Potassium channel subfamily K member 1	0.492468	0.722061	0.534289	0.881428	0.554375	0.502181	0.486457	0.858117	0.462559	0.507276	NA	NA	NA	NA	NA	NA	NA	NA	NA	NA	0.682087	0.784153	0.966111	1.00046	0.753007	0.846987	0.613338	0.719262	0.894877	1.0542	NA	NA	NA	NA	NA	NA	NA	NA	NA	NA	NA	NA	NA	NA	NA	NA	NA
O00182	LGALS9	Galectin-9	0.612358	1.28055	0.500382	1.06617	0.640824	1.26809	0.645456	1.36327	0.670976	1.51354	1.00383	3.61155	0.951961	4.10059	0.723577	2.3734	1.21144	2.4942	1.45417	2.69742	0.92741	2.20437	1.10361	2.26797	0.932412	1.88787	0.833502	2.37492	0.968677	2.22384	0.952858	1.62783	0.778195	1.19516	0.592338	1.38339	1.0979	2.11831	0.645212	1.1438	0.89207	4.38189	0.981764	4.55025	1.23212	4.00509	1.63493
O00186	STXBP3	Syntaxin-binding protein 3	1.33287	1.52014	0.820827	1.39591	1.02204	1.26824	1.02838	1.43397	1.21954	1.77724	1.04874	0.956572	0.720383	1.25662	0.902426	1.15041	0.938414	1.99268	1.0899	1.70819	0.926585	1.00999	0.863592	1.00444	0.943852	0.822089	0.735416	0.981438	1.04631	0.939443	0.799616	1.14676	0.680193	0.929655	0.647021	0.938648	0.81263	1.22703	0.727842	1.06003	0.800062	1.17357	0.577409	1.3117	0.713392	1.04571	0.832308
O00187	MASP2	Mannan-binding lectin serine protease 2	NA	NA	NA	NA	NA	NA	NA	NA	NA	NA	NA	NA	NA	NA	NA	NA	NA	NA	NA	NA	NA	NA	NA	NA	NA	NA	NA	NA	NA	NA	NA	NA	NA	NA	NA	NA	NA	NA	NA	NA	NA	NA	NA	NA	NA	NA	NA
O00189	AP4M1	AP-4 complex subunit mu-1	NA	NA	NA	NA	NA	NA	NA	NA	NA	NA	NA	NA	NA	NA	NA	NA	NA	NA	NA	NA	NA	NA	NA	NA	NA	NA	NA	NA	NA	NA	NA	NA	NA	NA	NA	NA	NA	NA	NA	NA	NA	NA	NA	NA	NA	NA	NA
O00192	ARVCF	Armadillo repeat protein deleted in velo-cardio-facial syndrome	1.40999	2.16107	0.381698	1.50183	1.59594	0.674089	1.34556	1.02907	0.554155	2.1947	0.440087	0.532537	0.529669	0.597002	0.51472	1.79731	0.413427	1.92254	0.519674	1.37869	1.1904	3.92301	1.15097	3.85874	1.46696	1.12356	1.04429	1.21558	1.50538	1.36301	1.04684	1.70956	0.718523	1.17767	0.719809	1.36922	0.570207	1.40481	0.927777	1.9495	0.656703	1.01713	0.619763	0.782789	0.589466	0.914467	0.620521
O00193	SMAP	Small acidic protein	0.123552	0.170736	0.0916064	0.172185	0.0923535	0.132962	0.0889314	0.191303	0.118526	0.183196	0.146139	0.1697	0.108991	0.199258	0.115067	0.242664	0.123147	0.223277	0.147628	0.220248	0.202938	0.346861	0.218606	0.262745	0.257126	0.481047	0.130497	0.244063	0.186811	0.311634	0.0684045	0.107835	0.147436	0.531099	0.138018	0.208313	0.151207	0.482838	0.184822	0.814109	0.163445	0.163966	0.100994	0.301929	0.113012	0.129539	0.105509
O00194	RAB27B	Ras-related protein Rab-27B	1.17489	2.44482	1.14526	3.59026	0.909347	4.80606	1.60522	3.3529	2.2284	2.74105	2.05063	5.78578	1.52677	3.70371	1.53516	5.91003	2.06527	5.42628	2.2485	4.14733	1.10724	2.52247	1.37376	2.64456	0.790148	1.53821	0.834248	1.71755	2.02051	3.86078	2.15446	6.40998	1.63118	4.36668	1.22797	5.42182	2.20917	7.62051	1.24616	3.12253	1.0395	2.92461	1.12791	4.09158	1.33265	2.43633	1.54564
O00203	AP3B1	AP-3 complex subunit beta-1	0.46022	0.762865	0.324084	0.763208	0.46059	0.71884	0.448909	0.713291	0.454486	0.822077	0.574499	0.845918	0.484876	0.867271	0.47072	0.92365	0.612006	0.842231	0.589008	1.01267	0.684129	0.867974	0.682836	1.07883	0.597389	0.790287	0.503311	0.825348	0.606174	0.955991	0.812548	0.79867	0.639806	1.03658	0.58444	0.868125	0.772896	1.15432	0.586019	1.34644	0.530954	0.846599	0.416986	0.942667	0.55089	0.910269	0.563746
O00204	SULT2B1	Sulfotransferase 2B1	0.749127	1.57665	2.31582	1.38478	0.635885	2.15843	1.10218	2.31084	3.10968	1.56246	2.7097	2.6148	1.45613	5.8425	1.9157	3.28113	6.87301	2.12834	1.85174	2.53327	3.31175	2.0833	2.11062	1.73557	0.92727	1.09735	0.755271	1.52174	0.924105	1.94854	1.01506	1.36973	1.51177	1.91823	2.26398	2.50722	1.35256	1.98606	1.25077	2.54782	0.76325	3.01073	2.48914	4.8586	2.47734	4.39222	8.68606
O00213	APBB1	Amyloid-beta A4 precursor protein-binding family B member 1	NA	NA	NA	NA	NA	NA	NA	NA	NA	NA	0.674703	0.443309	0.666907	0.526442	0.546894	0.593523	0.448429	0.62663	0.691016	0.406405	NA	NA	NA	NA	NA	NA	NA	NA	NA	NA	NA	NA	NA	NA	NA	NA	NA	NA	NA	NA	0.883776	0.60472	0.71	0.424385	0.765734	0.710559	0.764406
O00214	LGALS8	Galectin-8	1.43192	2.70684	1.03913	2.39951	1.38558	1.61669	1.28149	2.20567	1.39465	3.34354	0.789337	1.12754	0.721995	0.996558	0.731996	1.15819	1.01572	2.04085	0.864407	1.29632	1.26279	1.85819	1.07141	1.79095	1.0996	1.71759	1.14657	1.64999	1.09458	1.87559	0.838165	2.10753	0.776252	2.5593	0.693542	1.18169	0.758497	1.78187	0.624242	1.44406	0.160066	0.43513	0.136095	0.854975	0.197047	0.75976	0.260032
O00217	NDUFS8	NADH dehydrogenase [ubiquinone] iron-sulfur protein 8, mitochondrial	0.579371	1.06294	0.355656	2.0797	0.400491	0.876474	0.385677	0.837753	0.56929	1.18374	0.590582	0.842012	0.450098	0.972463	0.405339	1.36042	0.608758	1.90448	0.719517	1.58285	0.726233	1.18039	0.61883	1.45786	0.730852	0.695906	0.62149	1.22571	0.684757	1.3972	0.792868	0.946399	0.868653	1.08525	0.714674	1.27671	1.00096	2.42563	0.585704	2.75523	0.730925	1.2348	0.601333	1.03211	0.699215	1.15587	0.711287
O00221	NFKBIE	NF-kappa-B inhibitor epsilon	NA	NA	NA	NA	NA	NA	NA	NA	NA	NA	0.571436	0.891614	0.56047	1.15177	0.523489	1.14383	0.525121	1.06987	0.591143	0.919479	NA	NA	NA	NA	NA	NA	NA	NA	NA	NA	NA	NA	NA	NA	NA	NA	NA	NA	NA	NA	NA	NA	NA	NA	NA	NA	NA
O00231	PSMD11	26S proteasome non-ATPase regulatory subunit 11	0.369283	0.579044	0.269094	0.718895	0.277226	0.515757	0.284064	0.558524	0.322721	0.791479	0.264991	0.478719	0.221297	0.518314	0.254172	0.690536	0.292048	0.597503	0.327201	0.656092	0.293141	0.623769	0.231583	0.521246	0.235252	0.420987	0.208237	0.498759	0.240856	0.596918	0.34968	0.588166	0.354528	0.580108	0.309325	0.510241	0.357739	0.714976	0.337163	0.788724	0.23599	0.485317	0.209276	0.666382	0.242545	0.621803	0.31219
O00232	PSMD12	26S proteasome non-ATPase regulatory subunit 12	0.402056	0.693831	0.264966	0.775553	0.298941	0.453802	0.319232	0.705889	0.342445	0.842908	0.246743	0.455	0.200413	0.492588	0.226202	0.651274	0.305948	0.572293	0.304882	0.641633	0.450007	0.858571	0.406333	0.733531	0.387473	0.451562	0.365039	0.731587	0.394389	0.883524	0.397939	0.660682	0.34886	0.672461	0.31347	0.568491	0.445801	0.851667	0.333134	0.938539	0.394143	0.655485	0.374348	0.871833	0.363533	0.853106	0.452534
O00233	PSMD9	26S proteasome non-ATPase regulatory subunit 9	0.812629	1.01899	0.446448	1.02557	0.652093	0.801887	0.606152	1.18309	0.557238	1.24841	0.646721	0.772056	0.409514	0.901711	0.554999	1.09855	0.500691	0.965653	0.492526	0.942323	0.609102	0.984928	0.593991	0.978951	0.612456	0.757491	0.50508	0.853939	0.625436	0.972895	0.838427	1.599	0.641909	1.08786	0.592918	0.948447	0.852997	1.21029	0.732049	1.14669	0.659872	0.879425	0.468776	0.931781	0.550115	1.10592	0.590966
O00244	ATOX1	Copper transport protein ATOX1	0.39665	0.453363	0.293424	0.474058	0.419009	0.427654	0.362515	0.388937	0.44341	0.553706	2.339	1.08415	2.07432	1.32378	2.27313	1.13632	3.07915	0.982929	3.38763	1.33747	2.37679	1.78231	2.28779	1.37151	1.05852	1.06306	3.4786	2.33778	2.13662	1.88668	0.627125	0.601797	0.531292	0.709486	0.448951	0.679334	0.592271	0.685875	0.576551	0.970124	0.701024	0.780552	0.494276	0.92582	0.545982	0.664413	0.578969
O00255	MEN1	Menin	0.457559	0.879706	0.47293	0.652804	0.759556	0.420563	0.580724	0.396307	0.521322	1.06488	0.457387	0.624465	0.530964	0.734705	0.426376	0.800943	0.449736	0.819931	0.694169	0.619437	0.528012	0.673671	0.637945	0.828113	0.77637	0.666757	0.470831	0.804222	0.676426	0.681274	0.696561	0.647461	0.543121	0.699585	0.501153	0.716627	0.677128	0.946476	0.751161	0.67378	1.02708	1.08681	0.72874	1.08708	0.751835	0.918946	0.7291
O00264	PGRMC1	Membrane-associated progesterone receptor component 1	0.930763	1.34162	1.04624	1.12977	1.21752	1.07532	1.1274	0.940485	1.05698	1.38414	1.18068	1.28891	0.739476	1.09601	0.939079	1.5982	1.06267	2.22904	1.05267	1.14515	1.02352	1.35709	0.844838	1.28324	1.14406	0.753059	0.698659	1.04104	0.775495	0.969618	0.968564	1.14361	0.777799	1.51576	0.840319	1.02479	1.00121	1.16367	0.745034	1.47842	0.753455	1.13698	0.740918	0.920209	0.648712	1.02037	0.833654
O00267	SUPT5H	Transcription elongation factor SPT5	0.49349	0.945522	0.363496	1.06888	0.531372	0.669306	0.446368	0.891425	0.523735	1.00157	0.422436	0.761273	0.3668	0.737833	0.374526	0.806984	0.439504	0.838053	0.503781	0.673302	0.433101	0.78543	0.519095	0.80246	0.631885	0.658574	0.355937	0.777491	0.507379	0.799036	0.375989	0.734527	0.344359	0.941554	0.310957	0.642969	0.436267	0.908168	0.348048	0.918991	0.557216	0.76718	0.49487	1.0712	0.514494	0.933328	0.498612
O00268	TAF4	Transcription initiation factor TFIID subunit 4	0.584011	0.866387	0.448343	0.737577	1.01066	0.652118	0.581912	0.704337	0.72695	0.824987	NA	NA	NA	NA	NA	NA	NA	NA	NA	NA	0.53339	0.880582	0.541703	0.747647	0.654937	0.661449	0.383527	0.779718	0.535196	0.743816	0.581037	0.818047	0.450721	1.00949	0.387871	0.776304	0.612749	1.02618	0.50835	0.866149	0.566156	0.675849	0.358328	0.908069	0.350709	0.828583	0.538006
O00273	DFFA	DNA fragmentation factor subunit alpha	0.239543	0.422935	0.179272	0.534131	0.179311	0.183384	0.21753	0.369245	0.224932	0.337553	NA	NA	NA	NA	NA	NA	NA	NA	NA	NA	0.440544	0.567292	0.322004	0.552261	0.488803	0.47601	0.336208	0.514474	0.327249	0.423359	0.35904	0.331645	0.352387	0.497501	0.204895	0.464289	0.308644	0.566112	0.285621	0.699973	0.321823	0.401259	0.201946	0.528992	0.274512	0.506378	0.26999
O00291	HIP1	Huntingtin-interacting protein 1	0.726312	1.03835	0.456803	0.74811	0.761365	0.634169	0.738715	0.977563	0.696396	1.36439	0.841646	0.808475	0.564358	0.716368	0.603196	0.972736	0.695787	1.10184	0.738838	0.728329	0.904989	0.933485	0.96531	1.00495	0.954661	1.37123	0.846406	1.04578	1.0483	1.11161	0.90987	0.720206	0.848788	0.90796	0.557923	1.00779	0.974137	0.99182	0.700808	1.92579	0.786769	0.854901	0.688918	0.819493	0.683829	1.18104	0.737013
O00299	CLIC1	Chloride intracellular channel protein 1	0.671784	0.64615	0.551338	1.12738	0.470947	1.01712	0.60977	1.49025	0.641265	1.65518	0.637998	0.886882	0.450734	1.13965	0.473323	0.963463	0.543148	1.05463	0.539349	0.87189	0.853415	1.80642	0.734856	1.12707	0.704351	1.12807	0.619641	1.29375	0.845775	1.51593	0.735736	1.35496	0.665797	1.5536	0.59892	0.994358	0.717027	1.35469	0.772168	1.3684	1.52677	1.30888	1.1876	1.52066	1.37938	1.30378	1.44395
O00300	TNFRSF11B	Tumor necrosis factor receptor superfamily member 11B	NA	NA	NA	NA	NA	NA	NA	NA	NA	NA	NA	NA	NA	NA	NA	NA	NA	NA	NA	NA	NA	NA	NA	NA	NA	NA	NA	NA	NA	NA	NA	NA	NA	NA	NA	NA	NA	NA	NA	NA	NA	NA	NA	NA	NA	NA	NA
O00303	EIF3F	Eukaryotic translation initiation factor 3 subunit F	0.620649	1.01456	0.41874	0.908068	0.59815	0.655938	0.701398	0.895433	0.674687	1.09717	0.463572	0.709012	0.351079	0.574769	0.310543	0.734445	0.545717	0.608578	0.475376	0.633338	0.492353	0.833808	0.478238	0.691947	0.489337	0.657436	0.364368	0.726495	0.459796	0.845395	0.575419	0.684156	0.50997	0.88593	0.457208	0.706543	0.729925	0.981526	0.446577	0.890333	0.396176	0.594662	0.471986	0.803797	0.397419	0.762608	0.482027
O00305	CACNB4	Voltage-dependent L-type calcium channel subunit beta-4	NA	NA	NA	NA	NA	NA	NA	NA	NA	NA	0.748016	0.675113	0.672148	0.352197	0.47655	0.524238	0.478571	0.761051	0.548074	0.493643	0.973597	0.785555	0.787675	0.767107	1.35706	0.906136	1.12924	0.806149	1.65985	0.857491	NA	NA	NA	NA	NA	NA	NA	NA	NA	NA	NA	NA	NA	NA	NA	NA	NA
O00308	WWP2	NEDD4-like E3 ubiquitin-protein ligase WWP2	NA	NA	NA	NA	NA	NA	NA	NA	NA	NA	0.169457	0.620754	0.149397	0.473816	0.11476	0.64615	0.238792	0.721073	0.233867	0.689597	NA	NA	NA	NA	NA	NA	NA	NA	NA	NA	NA	NA	NA	NA	NA	NA	NA	NA	NA	NA	NA	NA	NA	NA	NA	NA	NA
O00329	PIK3CD	Phosphatidylinositol 4,5-bisphosphate 3-kinase catalytic subunit delta isoform	1.02854	1.68246	0.719729	1.90067	0.989657	1.67642	1.30048	1.58034	1.25689	1.82266	1.46536	1.79152	1.52387	4.05243	1.03052	2.16479	2.13013	2.25421	1.72114	0.931443	0.950604	1.6263	1.09427	1.16351	0.842962	1.40649	0.810127	2.35419	0.955173	1.45831	0.93887	1.38729	0.904506	1.21318	0.640894	1.50699	1.31789	1.81278	0.603423	1.06967	0.783171	1.68666	0.898245	1.69309	0.84983	1.61962	0.804255
O00330	PDHX	Pyruvate dehydrogenase protein X component, mitochondrial	0.465635	0.785731	0.314102	0.79485	0.454871	0.519709	0.416549	0.632847	0.481643	0.857715	0.389527	0.566146	0.330298	0.655157	0.396484	0.819483	0.451493	1.12699	0.378937	0.92749	0.509199	0.674809	0.458761	0.698787	0.559119	0.521774	0.403707	0.569593	0.488941	0.741025	0.536317	0.525101	0.465905	0.591285	0.306196	0.607661	0.500878	0.670513	0.348092	1.2231	0.45843	0.68101	0.399723	0.776662	0.369059	0.53608	0.433322
O00339	MATN2	Matrilin-2	5.08506	2.27644	3.44904	1.47755	5.58651	1.52841	2.59533	1.30888	2.22155	1.80672	4.33779	1.27981	2.90495	1.39703	4.00202	1.54467	2.97741	1.64051	2.54865	1.14961	1.90362	1.54401	3.04406	1.43413	4.92115	1.61121	5.77526	2.668	6.07954	2.52456	4.67563	1.8561	2.049	1.60615	5.0241	2.28276	3.44949	1.4835	8.02873	1.55684	7.45529	1.96012	5.53998	1.73445	6.27627	2.38441	3.54714
O00391	QSOX1	Sulfhydryl oxidase 1	1.70896	1.44211	1.32573	1.28747	3.25239	1.13449	1.94564	1.37692	1.85171	1.3172	2.00696	1.21925	0.946703	0.775295	1.42747	0.758578	1.41717	0.986412	0.904315	0.652863	1.42008	0.704801	1.36609	0.817076	1.10432	0.854798	1.05483	0.927523	0.920206	0.965146	3.19573	1.48545	2.24892	1.25553	2.12373	1.66654	2.15021	1.80096	1.80275	2.59697	3.9568	2.17043	3.23022	1.88561	2.37646	2.53089	3.35928
O00399	DCTN6	Dynactin subunit 6	1.08709	1.13462	0.735256	1.09017	0.918245	1.00446	0.855206	1.27116	0.82933	1.25454	0.632344	0.756365	0.499873	0.781806	0.81178	0.821334	0.686719	0.826138	0.613209	0.739464	1.06536	1.25183	1.08659	1.04483	1.45248	1.29914	1.33719	1.32531	1.3968	1.2866	1.26806	1.00154	0.93708	1.05707	1.04592	0.809959	1.06076	0.973823	1.00457	1.01331	0.793993	0.864014	0.771677	0.825928	0.753027	0.903148	0.750736
O00400	SLC33A1	Acetyl-coenzyme A transporter 1	0.732739	1.20197	0.459871	1.6806	0.708946	1.45822	0.724931	1.49179	0.891792	2.17461	0.680028	1.40807	0.548416	1.0157	0.608435	1.42136	0.682279	1.12331	0.796206	0.886608	1.17565	1.67995	1.03222	2.17411	0.86613	1.16671	0.717258	2.20102	0.802146	1.3963	0.982446	1.82341	1.07079	1.73199	0.737535	1.34705	1.34916	2.53813	0.84307	2.97612	0.819186	1.75225	0.776349	2.81955	0.61117	1.23743	0.743869
O00401	WASL	Neural Wiskott-Aldrich syndrome protein	0.57951	0.604353	0.476878	0.524707	0.479755	0.410571	0.408782	0.574052	0.464763	0.605689	0.262723	0.500852	0.324394	0.270166	0.354835	0.505353	0.329008	0.416733	0.304121	0.646856	0.607283	0.697934	0.633943	0.726412	0.652083	0.788102	0.397052	0.461744	0.536206	0.873668	1.14334	0.822686	0.807874	1.00244	0.693484	1.01741	0.926615	0.924818	0.921145	1.086	1.24973	0.970444	1.37732	1.04074	1.45789	1.12959	1.40697
O00408	PDE2A	cGMP-dependent 3',5'-cyclic phosphodiesterase	2.16881	0.84449	1.7252	0.751897	2.12213	0.617773	2.01204	0.655736	1.26723	0.743089	2.81231	1.03805	2.48822	1.25414	2.12342	0.989044	2.45863	0.996192	2.24771	1.43016	1.73201	0.743657	2.72189	0.771808	3.01327	1.09623	2.65481	1.11978	2.81426	1.03313	1.85987	0.888619	1.28937	1.025	1.26562	0.948831	1.44964	0.953683	1.5916	1.2207	2.22786	0.938814	1.60695	0.904136	1.45437	0.843584	1.57321
O00410	IPO5	Importin-5	0.307921	0.48343	0.206715	0.415673	0.225434	0.377699	0.247447	0.310103	0.243626	0.45902	0.316986	0.503097	0.237248	0.318291	0.241429	0.525702	0.31151	0.433439	0.269995	0.496079	0.35776	0.66839	0.302128	0.429705	0.35766	0.443714	0.313595	0.534739	0.345952	0.516694	0.282294	0.297929	0.287518	0.591613	0.24526	0.474697	0.319745	0.704836	0.243873	0.570323	0.453121	0.399554	0.34094	0.476044	0.383941	0.502365	0.431375
O00411	POLRMT	DNA-directed RNA polymerase, mitochondrial	NA	NA	NA	NA	NA	NA	NA	NA	NA	NA	NA	NA	NA	NA	NA	NA	NA	NA	NA	NA	NA	NA	NA	NA	NA	NA	NA	NA	NA	NA	NA	NA	NA	NA	NA	NA	NA	NA	NA	NA	NA	NA	NA	NA	NA	NA	NA
O00418	EEF2K	Eukaryotic elongation factor 2 kinase	0.60604	0.782447	0.426668	1.20452	0.539028	0.834767	0.456216	0.792905	0.622133	1.141	0.718095	0.98264	0.57715	0.969872	0.563809	1.40933	0.799421	1.56802	0.570973	1.21165	0.706698	1.3856	0.562105	1.29313	0.574481	1.00107	0.553507	0.915144	0.556337	0.874774	0.753258	1.23494	0.967773	1.30228	0.518749	1.13484	0.835483	1.29538	0.569112	0.93548	0.612875	0.932734	0.448296	0.991144	0.506558	0.98505	0.409898
O00422	SAP18	Histone deacetylase complex subunit SAP18	0.349091	1.14975	0.252595	0.903785	0.413671	0.570854	0.397753	0.678853	0.39318	0.953726	0.230492	0.568711	0.252248	0.599321	0.229338	0.676709	0.335437	0.829915	0.327125	0.650373	0.304581	0.507371	0.370512	0.665676	0.379827	0.67507	0.232635	0.456589	0.345211	0.54236	0.382458	0.565711	0.234712	0.658119	0.200216	0.491907	0.350501	0.717343	0.292235	0.610131	0.284017	0.4851	0.258172	0.69026	0.228273	0.632662	0.19926
O00423	EML1	Echinoderm microtubule-associated protein-like 1	1.96529	0.68143	0.687231	0.598398	1.53926	0.735623	0.694927	0.849472	0.760481	0.904831	2.51434	0.885033	1.24362	0.738106	1.30282	0.961629	1.34167	0.99759	1.60983	0.764907	0.601625	0.704592	0.693902	0.773045	0.994679	0.646014	0.769474	0.661042	0.895163	0.820526	1.14454	0.763681	0.845683	0.797204	1.3597	1.02294	1.42407	0.881161	1.0942	0.857962	1.15328	0.755061	0.914673	0.735	1.28201	0.877383	0.771001
O00425	IGF2BP3	Insulin-like growth factor 2 mRNA-binding protein 3	0.0788795	0.114364	0.0563739	0.21134	0.0709854	0.0736712	0.0632658	0.0951126	0.0761881	0.408305	0.0935732	0.211096	0.0702673	0.109829	0.078739	0.146915	0.0802089	0.173842	0.106981	0.111968	0.101596	0.144064	0.10677	0.559916	0.114459	0.133175	0.0892307	0.152171	0.12204	0.213006	0.113671	0.230795	0.109968	0.124909	0.102935	0.161336	0.122293	0.177763	0.112489	0.153443	0.128372	0.157897	0.106268	0.156173	0.093447	0.148274	0.112882
O00429	DNM1L	Dynamin-1-like protein	0.677406	0.793365	0.395015	0.830245	0.57269	0.619307	0.477986	0.63168	0.552923	0.888882	0.427058	0.691545	0.365605	0.521015	0.373392	0.861374	0.464798	0.836848	0.451378	0.782706	0.44486	0.735889	0.459871	0.787854	0.653656	0.570422	0.446082	0.657831	0.525109	0.654203	0.560202	0.511778	0.494535	0.920267	0.447681	0.776338	0.617985	0.884341	0.476323	1.0216	0.457926	0.616435	0.368579	0.764221	0.396964	0.651077	0.479149
O00442	RTCA	RNA 3'-terminal phosphate cyclase	1.10387	1.29798	0.982282	1.21864	1.12586	1.10998	1.26831	1.44427	1.35899	1.58174	0.783845	1.20095	0.605105	1.31198	0.601477	1.38913	0.817117	1.35684	0.926842	0.639896	0.757083	1.09791	0.789636	1.10477	0.857764	1.18093	0.926111	1.50677	0.894629	1.05248	0.663898	1.76164	0.690547	0.854374	0.567528	0.912445	0.843131	1.4502	0.496031	2.00926	0.554783	0.713661	0.570923	1.0423	0.674843	1.01691	0.671494
O00443	PIK3C2A	Phosphatidylinositol 4-phosphate 3-kinase C2 domain-containing subunit alpha	0.498693	0.920425	0.35463	0.593531	0.51564	0.541249	0.471865	0.589278	0.481989	1.0259	0.296853	0.485134	0.286361	0.415974	0.250218	0.610023	0.26746	0.590061	0.335466	0.514739	0.344606	0.475618	0.30765	0.364174	0.352127	0.352774	0.192412	0.356678	0.215168	0.381395	0.379092	0.552344	0.345191	0.653962	0.368102	0.547643	0.491975	0.696735	0.311142	0.994685	0.344324	0.590543	0.299469	0.661283	0.352672	0.671718	0.40533
O00458	IFRD1	Interferon-related developmental regulator 1	NA	NA	NA	NA	NA	NA	NA	NA	NA	NA	NA	NA	NA	NA	NA	NA	NA	NA	NA	NA	NA	NA	NA	NA	NA	NA	NA	NA	NA	NA	NA	NA	NA	NA	NA	NA	NA	NA	NA	NA	1.06769	1.16564	1.05661	1.07476	1.05378	1.04626	1.44096
O00459	PIK3R2	Phosphatidylinositol 3-kinase regulatory subunit beta	0.900167	1.13404	1.20398	1.02059	0.993037	0.850893	0.773766	0.636974	1.0937	1.08386	NA	NA	NA	NA	NA	NA	NA	NA	NA	NA	1.34345	1.69505	1.27807	1.48128	1.25211	1.81989	1.23223	2.37521	1.62945	1.56275	NA	NA	NA	NA	NA	NA	NA	NA	NA	NA	NA	NA	NA	NA	NA	NA	NA
O00461	GOLIM4	Golgi integral membrane protein 4	0.326823	0.965146	0.313954	0.580858	0.305823	0.467659	0.290381	0.684026	0.418084	0.737305	0.364573	1.6378	0.284209	0.332774	0.389064	0.533149	0.569524	0.368392	0.414083	0.532359	0.474474	0.406345	0.466903	0.601947	0.647338	0.989629	0.38952	0.438769	0.339647	0.481781	0.373531	0.348776	0.407971	0.672524	0.20593	0.549456	0.381338	0.533107	0.373449	1.48409	0.373609	0.553702	0.422266	0.530896	0.364514	0.756391	0.554679
O00462	MANBA	Beta-mannosidase	0.473985	0.629921	0.504833	0.74408	0.443532	0.629325	0.559551	0.669009	0.581471	1.38748	0.615457	0.588404	0.471651	0.848307	0.602488	0.809988	0.685112	0.850244	0.603955	0.532997	0.546802	0.717086	0.582028	1.20944	0.564186	0.661774	0.402786	0.720153	0.545378	0.580362	0.758293	1.1979	0.626014	1.23348	0.508683	0.818614	0.688184	1.00418	0.499227	2.94918	1.07996	1.20653	1.55446	1.42479	1.06288	1.1279	1.65984
O00463	TRAF5	TNF receptor-associated factor 5	0.552533	0.771116	0.304924	0.608958	0.454408	0.51938	0.444354	0.37076	0.312779	0.877492	NA	NA	NA	NA	NA	NA	NA	NA	NA	NA	NA	NA	NA	NA	NA	NA	NA	NA	NA	NA	0.495339	0.718014	0.526053	0.920049	0.422393	0.744111	0.536232	0.906558	0.474428	0.849884	NA	NA	NA	NA	NA	NA	NA
O00468	AGRN	Agrin	2.87121	2.97184	1.06003	2.62192	2.7337	1.24897	1.1287	3.42137	1.15725	2.91341	1.66462	2.08011	1.15084	1.25387	1.61123	1.34477	1.01025	1.87547	1.26741	2.0901	1.75282	1.60883	1.5062	1.57174	1.96499	2.73481	1.22314	1.77137	4.02083	2.81765	1.58825	2.13742	1.12477	2.54249	1.24427	1.54314	1.19595	1.59031	2.20092	3.07915	1.21722	1.51815	1.07576	1.11099	0.69546	2.72399	0.841022
O00469	PLOD2	Procollagen-lysine,2-oxoglutarate 5-dioxygenase 2	0.315058	1.86426	0.229706	0.847583	0.289672	0.490767	0.276201	0.902633	0.29975	1.12306	0.329773	0.542933	0.171458	0.26385	0.227146	0.522487	0.202924	0.272507	0.270351	0.569657	0.281333	0.861413	0.354375	0.711969	0.292461	0.68801	0.250817	1.72135	0.31541	0.599657	0.277791	0.905893	0.259406	1.01829	0.190887	0.304763	0.269603	0.41555	0.197407	0.493281	0.187974	0.578823	0.164389	0.400112	0.160309	1.84419	0.200616
O00470	MEIS1	Homeobox protein Meis1	1.88214	1.72268	1.20905	1.07007	2.14584	1.59558	1.16735	0.797938	1.7504	1.53731	0.91532	1.22446	0.663837	0.969723	0.606662	1.38173	0.723178	1.75356	0.974878	2.21683	0.994306	2.1145	1.11378	1.20467	2.35615	1.94471	0.946705	1.1627	1.70981	1.08531	0.960754	0.737234	0.68049	1.12702	0.971867	1.55669	1.10332	1.07891	1.0768	1.17865	1.05981	1.51847	0.510309	1.36178	0.980882	1.56091	0.918197
O00471	EXOC5	Exocyst complex component 5	0.706804	0.854952	0.459695	0.951956	0.6049	0.853497	0.619096	1.03792	0.654952	1.06129	0.712976	0.864193	0.47741	0.840988	0.569	0.985713	0.694658	1.01645	0.697993	1.15436	0.59714	0.703408	0.627195	0.998476	0.606198	0.784458	0.544467	0.769403	0.64752	0.828101	0.880441	0.998203	0.804443	1.00005	0.685846	0.908922	0.890548	1.01582	0.660275	1.2834	0.627147	0.716366	0.4956	0.844101	0.608207	0.885205	0.688744
O00478	BTN3A3	Butyrophilin subfamily 3 member A3	1.83863	1.91679	1.06662	1.70286	1.59579	1.38925	1.77531	1.82344	2.05217	2.86418	1.43813	1.91811	1.58029	2.17839	1.55291	2.18196	1.55427	3.04622	1.68142	1.38263	2.15425	4.24753	2.62823	2.65672	2.63433	2.89621	1.90009	4.74411	2.39242	2.33661	1.67525	2.04247	1.07715	2.4163	0.748328	1.25247	2.12769	2.44452	1.08166	3.77145	0.780664	1.11782	0.785144	1.3938	0.4426	0.539443	0.729348
O00481	BTN3A1	Butyrophilin subfamily 3 member A1	1.96623	2.07532	1.06688	2.59092	2.66784	2.03738	2.22887	2.65801	2.41194	3.80143	1.81831	2.47676	1.45454	3.30456	1.46431	2.18206	2.04244	3.32607	2.66986	1.91744	1.44636	2.80794	2.02196	2.35113	2.66149	2.73828	1.84214	3.41834	1.62517	1.74198	1.73888	2.06449	1.41945	1.82582	1.14704	1.63028	2.50207	2.57043	1.14868	1.91156	2.45587	2.84663	1.55005	3.51495	1.13396	1.26405	1.40424
O00483	NDUFA4	Cytochrome c oxidase subunit NDUFA4	0.659649	1.85796	0.37079	1.14594	0.416062	1.28551	0.390445	0.963929	0.776657	2.22073	0.81838	1.13336	0.521958	1.60058	0.572457	1.90077	0.740609	2.2615	0.806298	1.25748	1.10283	1.8981	0.784015	2.50918	0.914535	1.13506	0.858439	1.80849	0.795234	1.78487	0.848317	1.20463	0.942311	1.23558	0.698562	1.65544	1.06032	3.26302	0.617421	3.88655	0.507223	1.23771	0.457608	0.838958	0.615127	0.871374	0.565164
O00487	PSMD14	26S proteasome non-ATPase regulatory subunit 14	0.488037	0.84136	0.395511	0.816036	0.469076	0.604891	0.464754	0.698208	0.495775	0.831707	0.460448	0.606597	0.544478	0.719342	0.364687	0.768678	0.478361	0.733542	0.46663	0.824411	0.456743	0.740679	0.426708	0.63985	0.361048	0.679219	0.31287	0.621961	0.4097	0.647965	0.555076	0.621275	0.482253	0.688722	0.39237	0.660295	0.520988	0.90705	0.462347	1.03893	0.492727	0.686052	0.485397	0.859024	0.438968	0.849548	0.524089
O00499	BIN1	Myc box-dependent-interacting protein 1	0.977541	0.689895	0.970763	0.452297	0.754452	0.536272	0.596248	0.498131	0.685206	0.531619	0.903632	0.648942	0.83411	0.637088	0.795022	0.693447	0.645724	0.650333	0.998237	0.455156	1.06945	0.694053	0.889938	0.420106	1.28864	0.641768	0.754388	1.03071	0.77565	0.556993	1.08064	0.389102	0.788291	0.616266	0.553348	0.708573	0.97343	0.709832	0.957596	0.577647	1.26637	0.889461	0.793171	0.912407	1.3415	0.568773	0.990286
O00505	KPNA3	Importin subunit alpha-4	0.429903	0.885142	0.343725	1.13805	0.44216	0.74854	0.507362	1.52047	0.571906	1.15939	1.05486	1.01777	0.790784	0.765983	0.504673	1.01866	1.03191	0.834008	0.84322	0.931871	0.577101	1.22597	0.563173	1.00789	0.439118	0.642906	0.524378	0.893806	0.588605	0.920118	0.304585	0.556685	0.317699	0.660609	0.297928	0.575024	0.436713	0.566254	0.280648	0.696888	0.2701	0.383839	0.273818	0.68146	0.253038	0.66473	0.330083
O00506	STK25	Serine/threonine-protein kinase 25	0.527561	0.967321	0.227258	0.786323	0.520853	0.831862	0.425639	0.994301	0.536235	0.757073	0.421407	0.817	0.414705	0.72694	0.38811	0.728161	0.392456	0.822061	0.54263	0.840955	0.543471	0.543372	0.466206	0.942771	0.570836	0.889127	0.417192	0.797734	0.450066	0.82895	0.430708	0.447663	0.525477	0.845254	0.271109	0.818269	0.52726	0.8964	0.441137	1.30185	0.525381	0.75589	0.472092	0.88345	0.566295	0.827346	0.547064
O00507	USP9Y	Probable ubiquitin carboxyl-terminal hydrolase FAF-Y	0.0701855	0.134383	0.0669208	0.155363	0.0596109	0.0858982	0.0458354	0.117648	0.0724907	0.103713	0.165228	0.0966914	0.119827	0.139951	0.0810988	0.213932	0.196179	0.155512	0.13992	0.145833	NA	NA	NA	NA	NA	NA	NA	NA	NA	NA	0.596842	0.172222	0.311976	1.00759	0.238941	0.189475	0.315693	0.243708	0.331489	0.469136	NA	NA	NA	NA	NA	NA	NA
O00515	LAD1	Ladinin-1	0.966967	3.19632	1.11987	3.24962	0.837216	2.12824	0.989398	7.90624	1.80433	2.37072	1.12757	8.65039	1.36363	1.81087	1.56968	3.21164	1.48442	1.48544	1.51475	7.21368	2.16573	3.37769	1.28374	2.42441	0.90349	2.1807	0.759271	1.32302	0.980566	1.75165	1.00775	1.4204	1.13013	5.71613	0.727646	1.38392	1.02049	2.22652	0.692798	2.50781	0.633589	1.60698	0.806909	3.09	1.09372	2.66017	1.09608
O00519	FAAH	Fatty-acid amide hydrolase 1	NA	NA	NA	NA	NA	NA	NA	NA	NA	NA	NA	NA	NA	NA	NA	NA	NA	NA	NA	NA	NA	NA	NA	NA	NA	NA	NA	NA	NA	NA	2.30099	4.97355	3.01157	6.43109	2.71343	3.08623	2.67252	4.24813	2.26241	15.9525	0.882318	0.991396	0.701995	0.815488	0.829104	0.928725	0.818211
O00533	CHL1	Neural cell adhesion molecule L1-like protein	NA	NA	NA	NA	NA	NA	NA	NA	NA	NA	1.74858	0.541345	0.847439	1.04349	1.3949	1.23699	0.8545	1.03152	0.745305	0.859285	2.002	1.98328	2.55085	2.51779	1.67577	2.33313	5.89314	1.51849	2.50436	1.44753	1.18052	0.821486	0.935306	0.899985	1.39338	0.943066	1.07414	3.62315	0.774734	0.712268	1.88513	0.790365	1.39507	0.910529	1.41073	3.22555	1.2716
O00534	VWA5A	von Willebrand factor A domain-containing protein 5A	2.41485	2.29225	1.81059	1.93333	2.25138	1.71819	3.12531	2.13753	2.60852	2.30154	2.6326	1.48223	1.64326	1.90121	1.51066	1.97066	2.80981	4.2564	1.86713	3.40076	1.80899	1.73875	2.37227	2.18662	1.5134	1.77977	1.94862	2.0206	2.21926	2.09126	2.65655	2.1712	1.59475	1.45026	1.3881	1.5228	2.12469	1.88386	1.35119	2.11368	1.4217	2.52633	1.31064	3.96782	2.10523	2.25151	1.8296
O00541	PES1	Pescadillo homolog	0.158186	0.55483	0.14055	0.515225	0.184152	0.24879	0.202695	0.248999	0.176139	0.437766	0.18722	0.348407	0.148387	0.329429	0.162209	0.388763	0.181445	0.449462	0.213333	0.403822	0.176367	0.414318	0.1982	0.434942	0.17888	0.383377	0.135643	0.389909	0.179425	0.501133	0.153006	0.287257	0.147838	0.369105	0.122591	0.266938	0.164023	0.396836	0.137722	0.294007	0.156678	0.226149	0.124329	0.349241	0.13336	0.290701	0.153599
O00560	SDCBP	Syntenin-1	NA	NA	NA	NA	NA	NA	NA	NA	NA	NA	0.330091	0.594476	0.413606	0.945546	0.34568	0.696726	0.366793	0.611898	0.375881	0.541848	0.424066	0.462415	0.449321	0.871125	0.680255	0.677866	0.290897	0.565605	0.439958	0.512861	0.442791	0.260426	0.851138	0.760973	0.3113	0.593438	0.59262	0.772727	0.470429	0.947701	0.410625	0.587219	0.376556	0.596064	0.504559	0.468497	0.372489
O00562	PITPNM1	Membrane-associated phosphatidylinositol transfer protein 1	0.924792	1.2793	0.711093	1.11869	0.856068	0.913849	0.916339	1.19129	1.00324	1.25527	0.480894	1.13372	0.555375	1.20715	0.525649	1.40633	0.674487	1.0513	0.549496	1.55284	1.21541	2.07838	1.32372	1.83994	0.76504	1.5972	0.782329	2.10907	0.956257	2.76823	0.937358	2.04385	0.985229	2.3432	0.633632	1.47487	1.11825	1.80299	0.608329	1.26442	0.691534	1.57057	0.555347	1.67472	0.638182	1.49864	0.995568
O00566	MPHOSPH10	U3 small nucleolar ribonucleoprotein protein MPP10	0.0960316	0.433204	0.110376	0.28911	0.0739486	0.102986	0.0771655	0.137647	0.106104	0.216539	0.0790866	0.117245	0.0940744	0.22776	0.0749806	0.228894	0.126865	0.172681	0.108616	0.338142	0.10133	0.104338	0.0861064	0.153869	0.093976	0.120508	0.0561617	0.125689	0.0771979	0.134242	0.157591	0.13198	0.124994	0.414494	0.0757123	0.26304	0.121178	0.244901	0.118263	0.307841	NA	NA	NA	NA	NA	NA	NA
O00567	NOP56	Nucleolar protein 56	0.295553	0.775026	0.282153	0.573149	0.431486	0.477336	0.436095	0.362518	0.411674	0.667153	0.230589	0.496585	0.223422	0.46985	0.194525	0.627088	0.249671	0.540851	0.283252	0.663818	0.392212	0.707544	0.572845	0.69408	0.434013	0.596923	0.396986	0.706389	0.473676	0.751945	0.245147	0.299194	0.196528	0.567044	0.182784	0.480716	0.306573	0.485515	0.310142	0.490332	0.186034	0.358326	0.150394	0.51403	0.162503	0.330469	0.197303
O00570	SOX1	Transcription factor SOX-1	0.0671937	0.0695841	0.0575196	0.115661	0.0671883	0.0847465	0.0682281	0.11185	0.0667917	0.306008	0.0866898	0.106923	0.0659046	0.136638	0.0854064	0.193007	0.0858828	0.16989	0.074111	0.0975196	NA	NA	NA	NA	NA	NA	NA	NA	NA	NA	NA	NA	NA	NA	NA	NA	NA	NA	NA	NA	NA	NA	NA	NA	NA	NA	NA
O00571	DDX3X	ATP-dependent RNA helicase DDX3X	0.226822	0.53875	0.175371	0.532348	0.188882	0.319423	0.159677	0.322048	0.185511	0.423284	0.29481	0.5251	0.250137	0.475945	0.253519	0.63899	0.306721	0.583866	0.30493	0.612816	0.330542	0.593353	0.30066	0.596169	0.266931	0.52077	0.233969	0.440783	0.28621	0.587861	0.255493	0.435863	0.2552	0.47368	0.213117	0.500163	0.260104	0.643142	0.205317	0.548158	0.239197	0.478449	0.231718	0.605868	0.254636	0.719576	0.289628
O00584	RNASET2	Ribonuclease T2	0.843102	0.938036	0.588078	1.30966	0.659881	0.995761	0.7399	1.0156	0.901298	2.16893	0.984518	1.29392	0.778978	1.96072	0.73967	1.37065	1.35917	3.70784	1.42203	1.51115	1.11531	0.941576	0.955547	1.55832	0.870377	0.745602	0.834479	1.23509	0.889681	1.26438	0.893886	3.87919	1.19267	0.945955	0.73439	1.4497	1.02748	2.04461	0.716193	10.0665	0.756819	1.81451	0.680319	1.32413	0.809609	1.36094	0.769125
O00592	PODXL	Podocalyxin	0.482747	0.854442	0.229054	0.492152	0.422534	0.299593	0.164988	0.400261	0.200747	0.324892	0.18647	0.247182	0.116395	0.186631	0.214771	0.240783	0.149081	0.324974	0.187134	0.404707	0.271475	0.25697	0.188553	0.383696	0.403119	0.274551	0.199416	0.283416	0.447569	0.520843	0.270471	0.346953	0.208811	0.299643	0.186613	0.248024	0.289992	0.339254	0.203063	0.599513	0.248692	0.262669	0.175031	0.228301	0.193869	0.303204	0.226974
O00602	FCN1	Ficolin-1	1.51135	2.52075	1.51428	5.23719	1.39363	1.81511	3.15157	2.71632	1.61198	6.28653	1.53319	2.70548	1.32558	2.49985	1.24584	1.89234	2.67564	1.54891	3.26881	1.03327	2.23327	2.81715	4.41765	6.05268	1.68551	3.14108	1.69815	3.15112	0.743315	3.16576	1.52876	2.96579	0.854824	1.3381	0.896349	1.35968	2.48248	1.49128	0.668683	0.948204	1.64985	3.3626	3.19792	2.58843	3.9673	4.52583	1.91366
O00622	CCN1	CCN family member 1	NA	NA	NA	NA	NA	NA	NA	NA	NA	NA	NA	NA	NA	NA	NA	NA	NA	NA	NA	NA	0.1791	0.134798	0.211332	0.181103	0.316424	0.511044	0.111484	0.135985	0.257105	0.201173	NA	NA	NA	NA	NA	NA	NA	NA	NA	NA	NA	NA	NA	NA	NA	NA	NA
O00625	PIR	Pirin	0.439638	0.458282	0.207885	0.591127	0.375309	0.413434	0.267212	0.53925	0.287156	2.01283	0.416341	1.42014	0.355299	1.01746	0.381868	1.26374	0.413124	0.961081	0.371217	0.823513	0.431211	0.742405	0.408754	1.66001	0.542903	0.737102	0.391065	0.49076	0.492247	1.08521	0.512854	1.68432	0.396586	1.45839	0.235896	1.73127	0.43731	1.84095	0.31089	1.45471	0.459015	1.04002	0.337395	0.723757	0.383763	0.828899	0.389476
O00629	KPNA4	Importin subunit alpha-3	2.85527	0.946563	1.87961	0.991817	1.79458	1.01423	0.927494	0.789384	0.846592	1.3779	0.703684	1.28437	0.457008	0.846559	0.557898	0.979425	0.973765	0.891725	0.612022	0.919766	0.460468	0.861291	0.55055	1.01617	0.506893	1.02757	0.445135	0.88433	0.607389	0.809263	0.671588	1.2229	0.585606	1.21787	0.518224	0.880275	0.715059	1.02734	0.457351	1.0445	0.795971	0.806079	0.530734	0.755599	0.894591	0.921306	0.469186
O00635	TRIM38	E3 ubiquitin-protein ligase TRIM38	1.29546	1.46087	1.21657	2.98606	2.50567	2.74767	2.07601	2.51488	2.33401	4.20627	1.48051	2.3463	1.25851	2.33778	0.970932	2.57565	1.5537	2.96273	1.80608	1.91789	1.41905	2.1081	1.41998	2.20452	1.7135	1.96461	1.42545	2.16446	2.06239	1.84923	1.47202	2.11086	1.42716	2.17944	1.09821	2.04981	1.97259	3.0911	1.22593	2.35959	1.51888	2.22812	1.4862	2.98639	1.52567	2.17357	1.43013
O00712	NFIB	Nuclear factor 1 B-type	NA	NA	NA	NA	NA	NA	NA	NA	NA	NA	NA	NA	NA	NA	NA	NA	NA	NA	NA	NA	NA	NA	NA	NA	NA	NA	NA	NA	NA	NA	0.698171	0.434601	0.528353	0.704355	0.447957	0.47116	0.56591	0.529042	0.583583	1.36138	NA	NA	NA	NA	NA	NA	NA
O00743	PPP6C	Serine/threonine-protein phosphatase 6 catalytic subunit	0.411824	0.829679	0.269712	0.961982	0.368648	0.533798	0.367159	0.750348	0.33746	0.850716	0.638854	0.833609	0.511488	0.930042	0.519957	0.926419	0.63194	0.900387	0.583668	0.984131	0.500835	0.769542	0.56349	0.808997	0.503786	0.762204	0.533872	0.920079	0.694831	0.789907	0.421999	0.841429	0.37113	0.712104	0.3592	0.667422	0.508961	0.929552	0.316451	0.818398	0.42877	0.716197	0.409383	0.755591	0.376517	0.746928	0.43304
O00748	CES2	Cocaine esterase	0.33108	0.973504	0.520304	0.877218	0.387805	1.78034	0.349006	0.989886	0.682635	1.03318	1.02879	6.04828	0.84183	1.10458	0.783173	0.928843	1.77796	1.17244	0.686852	1.7217	0.611964	0.847196	0.854464	2.72248	0.586033	0.776821	0.491461	0.747271	0.566831	2.08013	0.869706	5.02377	1.09531	1.69816	1.03606	4.77855	0.861861	2.626	0.576147	0.801642	1.35144	2.89474	1.3358	1.84864	1.14916	2.14393	1.75914
O00750	PIK3C2B	Phosphatidylinositol 4-phosphate 3-kinase C2 domain-containing subunit beta	NA	NA	NA	NA	NA	NA	NA	NA	NA	NA	NA	NA	NA	NA	NA	NA	NA	NA	NA	NA	NA	NA	NA	NA	NA	NA	NA	NA	NA	NA	0.497185	0.884195	0.604089	0.812365	0.473702	0.739139	0.604138	0.997258	0.452966	0.637575	NA	NA	NA	NA	NA	NA	NA
O00754	MAN2B1	Lysosomal alpha-mannosidase	0.859552	1.43988	0.727251	1.6758	0.647576	1.03621	0.810957	1.13931	0.908473	1.57784	0.863549	1.08211	0.567726	1.58692	0.752102	1.21	0.878547	0.963613	0.808502	0.876905	0.996876	1.16365	1.14438	1.26092	0.975273	1.08605	0.877844	1.70351	0.823688	1.27706	0.97082	1.24575	0.889983	1.53736	0.610587	1.08243	0.952127	1.46751	0.650162	1.67948	0.563361	1.19401	0.539653	1.56105	0.660052	1.30857	0.860126
O00757	FBP2	Fructose-1,6-bisphosphatase isozyme 2	1.32256	2.36128	1.24994	5.64063	1.59535	10.0707	2.61974	4.19415	1.64002	4.05364	NA	NA	NA	NA	NA	NA	NA	NA	NA	NA	NA	NA	NA	NA	NA	NA	NA	NA	NA	NA	NA	NA	NA	NA	NA	NA	NA	NA	NA	NA	2.00315	7.69748	1.4901	15.0642	1.85183	21.4469	1.93273
O00762	UBE2C	Ubiquitin-conjugating enzyme E2 C	0.0830266	0.438085	0.0933947	0.763158	0.0688958	0.378795	0.103206	0.473204	0.12818	1.01489	NA	NA	NA	NA	NA	NA	NA	NA	NA	NA	NA	NA	NA	NA	NA	NA	NA	NA	NA	NA	NA	NA	NA	NA	NA	NA	NA	NA	NA	NA	NA	NA	NA	NA	NA	NA	NA
O00763	ACACB	Acetyl-CoA carboxylase 2	NA	NA	NA	NA	NA	NA	NA	NA	NA	NA	NA	NA	NA	NA	NA	NA	NA	NA	NA	NA	NA	NA	NA	NA	NA	NA	NA	NA	NA	NA	NA	NA	NA	NA	NA	NA	NA	NA	NA	NA	NA	NA	NA	NA	NA	NA	NA
O00764	PDXK	Pyridoxal kinase	0.507869	0.790273	0.364017	1.05363	0.421134	0.905946	0.476943	1.01661	0.507966	0.884779	0.367053	0.672517	0.272612	0.894182	0.301349	0.992479	0.474713	0.966197	0.397285	0.740512	0.701412	0.992014	0.483311	1.00813	0.479311	0.432801	0.51152	1.03128	0.608991	1.16844	0.64874	1.01049	0.664233	1.41453	0.498462	1.16775	0.726494	1.3437	0.645319	1.75216	0.518871	0.888035	0.373434	1.45482	0.417649	1.23939	0.504986
O00767	SCD	Acyl-CoA desaturase	0.189003	0.767021	0.188212	1.38355	0.16777	0.871864	0.274501	0.971867	0.295709	1.17688	NA	NA	NA	NA	NA	NA	NA	NA	NA	NA	0.166263	0.682066	0.178641	0.951589	0.0981639	0.948475	0.0971263	0.349429	0.105969	0.152494	0.193666	0.819588	0.130712	0.342407	0.147809	0.213206	0.286931	0.636246	0.108895	0.201591	NA	NA	NA	NA	NA	NA	NA
O14492	SH2B2	SH2B adapter protein 2	NA	NA	NA	NA	NA	NA	NA	NA	NA	NA	NA	NA	NA	NA	NA	NA	NA	NA	NA	NA	NA	NA	NA	NA	NA	NA	NA	NA	NA	NA	NA	NA	NA	NA	NA	NA	NA	NA	NA	NA	NA	NA	NA	NA	NA	NA	NA
O14493	CLDN4	Claudin-4	NA	NA	NA	NA	NA	NA	NA	NA	NA	NA	NA	NA	NA	NA	NA	NA	NA	NA	NA	NA	0.464873	0.776797	0.548423	0.940943	0.488706	0.699934	0.479258	0.698534	0.583259	0.624742	NA	NA	NA	NA	NA	NA	NA	NA	NA	NA	NA	NA	NA	NA	NA	NA	NA
O14494	PLPP1	Phospholipid phosphatase 1	2.27302	0.972955	1.39136	1.06075	2.21741	1.63483	1.52909	1.78252	1.55475	1.64189	1.96527	2.16525	1.01653	1.12545	1.89074	1.98941	0.940338	2.00542	1.40976	0.80713	3.30388	1.66928	1.69491	1.08448	1.57876	1.43794	1.18595	1.42237	1.9991	1.29666	2.48131	0.822147	1.96133	1.29854	1.25756	2.39514	0.884482	1.62634	2.92591	1.32276	1.67511	1.66542	1.25839	0.812275	0.904577	1.44164	1.22254
O14495	PLPP3	Phospholipid phosphatase 3	1.92803	1.90628	2.92462	1.28964	1.994	1.52318	2.3121	1.32378	4.28475	1.9553	1.48032	1.34214	1.22385	1.17454	4.43499	2.25026	1.15353	1.76202	1.75367	1.12528	4.74019	1.59873	5.29242	1.55556	2.46196	1.59601	2.72411	1.72705	2.40331	1.23105	5.52952	1.46374	5.11394	1.30269	5.05014	2.37801	3.31173	1.58963	11.1593	1.82839	3.03487	1.89798	3.03942	2.02631	2.14456	1.18372	2.44056
O14497	ARID1A	AT-rich interactive domain-containing protein 1A	0.771362	2.11559	0.689697	1.83081	0.852732	1.71226	0.837373	1.49468	0.960483	2.16231	0.570912	1.6574	0.602467	1.3667	0.57174	1.63346	0.751111	1.8601	0.96025	1.77168	0.586067	1.3983	0.732202	1.74679	0.666189	1.46373	0.391924	1.25877	0.607947	1.26488	0.765707	1.43287	0.58736	2.02701	0.49695	1.32284	0.922907	1.98204	0.668994	1.68807	0.603327	1.22123	0.685758	1.80514	0.666067	1.89277	0.820345
O14498	ISLR	Immunoglobulin superfamily containing leucine-rich repeat protein	2.04195	1.63982	1.51877	1.08102	2.24095	1.28847	1.26322	1.22415	1.79505	1.67054	1.64843	1.89831	1.07467	1.07465	1.17247	1.16984	1.34141	1.60095	1.37751	1.36858	2.52214	1.57204	1.66731	1.19893	2.09117	1.72132	1.62842	1.66214	1.68616	1.76905	2.9296	1.39883	2.1159	1.75908	2.19262	2.79596	2.13191	1.80037	2.20764	2.1997	2.38853	1.4198	2.00784	1.12108	1.52235	1.76961	1.56922
O14524	NEMP1	Nuclear envelope integral membrane protein 1	0.96423	1.4102	0.552977	0.96674	1.85053	0.738996	0.959809	0.901075	0.698447	1.50072	NA	NA	NA	NA	NA	NA	NA	NA	NA	NA	0.637393	0.815394	0.698051	0.896843	0.856703	0.80267	0.566758	0.702182	1.31284	0.770479	0.823904	1.2122	0.57246	0.770044	0.589721	0.799035	1.10885	0.956813	0.717839	0.670565	1.10558	0.95523	0.650665	0.833017	0.716501	0.983576	0.812759
O14529	CUX2	Homeobox protein cut-like 2	0.587784	1.38916	0.447745	1.07197	0.532373	0.629663	0.505046	0.76218	0.580829	0.771516	0.598444	1.18928	0.537799	1.1609	0.464931	1.18539	0.802505	0.834428	0.646912	1.0305	0.514635	0.76576	0.538779	0.607223	0.769651	0.737214	0.334769	0.604398	0.763777	0.794828	0.88731	0.690232	0.851504	1.19398	0.448021	0.860384	0.769865	0.970095	0.710054	1.24537	0.480715	0.680436	0.41121	1.01454	0.442423	0.943817	0.497437
O14530	TXNDC9	Thioredoxin domain-containing protein 9	0.528963	1.10513	0.385221	1.48041	0.387232	0.616513	0.359894	1.42643	0.428661	1.1145	0.541078	0.88385	0.724674	0.670141	0.678885	0.835113	0.532062	0.566972	0.502084	0.870141	0.515194	1.04086	0.469699	1.05041	0.486803	0.950945	0.486942	0.810533	0.4063	0.926235	0.367076	0.528552	0.376262	1.13317	0.268242	0.698384	0.396336	0.972693	0.34319	0.908313	0.0935342	0.0966941	0.0658447	0.193826	0.0742968	0.185539	0.105717
O14531	DPYSL4	Dihydropyrimidinase-related protein 4	NA	NA	NA	NA	NA	NA	NA	NA	NA	NA	NA	NA	NA	NA	NA	NA	NA	NA	NA	NA	0.295598	0.228428	0.336989	0.255004	0.354761	0.398167	0.341209	0.264904	0.395165	0.239593	NA	NA	NA	NA	NA	NA	NA	NA	NA	NA	NA	NA	NA	NA	NA	NA	NA
O14545	TRAFD1	TRAF-type zinc finger domain-containing protein 1	0.552507	1.24228	0.506351	1.07828	0.515441	1.06073	0.585132	1.09937	0.717458	1.82608	0.691084	0.910418	0.517658	0.976314	0.584556	1.3326	0.512074	1.54843	0.601155	0.852648	0.478681	0.971786	0.406904	0.81193	0.421786	0.730213	0.264723	1.60286	0.341228	2.03634	0.578353	2.01544	0.536248	1.13743	0.493337	0.973278	0.721872	1.22714	0.492192	0.688383	0.50752	0.991354	0.480965	1.32004	0.498613	0.641542	0.545938
O14548	COX7A2L	Cytochrome c oxidase subunit 7A-related protein, mitochondrial	0.44933	1.80233	0.353827	0.691018	0.304417	0.510713	0.294016	0.615245	0.439528	0.920535	0.639475	1.0857	0.626512	1.09444	0.603591	1.65117	0.75566	1.42962	0.698688	1.13335	0.678164	1.27976	0.526979	1.56901	0.662421	0.747293	0.536997	0.806355	0.513907	1.18911	0.497612	0.904548	0.474078	0.916661	0.296688	0.892642	0.531944	1.55112	0.428151	1.47224	0.473338	0.797343	0.385267	1.25112	0.484217	0.642638	0.438537
O14556	GAPDHS	Glyceraldehyde-3-phosphate dehydrogenase, testis-specific	1.03246	2.05385	0.390217	0.969644	0.620188	0.738036	0.422931	0.886285	0.680369	0.921002	1.09149	0.803662	0.446315	0.650212	0.527156	1.28206	0.481208	0.717681	0.454577	1.14509	1.12403	2.22232	1.17599	1.71542	1.1555	1.96241	1.24728	1.73728	0.857226	1.16259	0.850803	1.02839	0.993117	1.96597	0.939207	1.21979	1.88327	2.10602	0.498423	1.3696	0.570252	0.701604	0.469746	0.840899	0.52454	0.84895	0.545752
O14558	HSPB6	Heat shock protein beta-6	2.10558	1.07136	1.64906	1.11971	1.25116	0.925341	1.44523	0.889384	1.61986	1.07947	2.36015	2.39203	1.83928	2.72408	3.50638	2.23199	2.73455	1.86406	2.83554	3.26671	2.26262	0.800894	2.67718	1.07159	3.92375	1.09524	3.02413	1.29606	3.48732	0.902376	1.44586	0.683063	1.292	0.816594	0.761328	1.05898	0.977052	0.917939	1.25747	0.972953	5.86877	1.83214	2.97504	1.966	2.61833	1.77103	3.67682
O14561	NDUFAB1	Acyl carrier protein, mitochondrial	0.193389	0.337298	0.106443	0.583031	0.118947	0.394427	0.11442	0.328725	0.178084	0.601847	0.16258	0.313849	0.135655	0.37233	0.14716	0.68016	0.176089	0.715282	0.184497	0.475051	0.199753	0.402124	0.166426	0.580325	0.168862	0.307811	0.125848	0.417043	0.183872	0.533703	0.181425	0.615588	0.222777	0.420147	0.178225	0.439815	0.24107	0.578774	0.162707	0.716656	0.170819	0.45535	0.154153	0.471122	0.182772	0.449393	0.21455
O14562	UBFD1	Ubiquitin domain-containing protein UBFD1	0.363519	0.536516	0.171111	0.550946	0.283231	0.460287	0.254904	0.383791	0.328469	0.742534	0.278198	0.425974	0.170705	0.322994	0.239795	0.581317	0.280665	0.356646	0.24349	0.296604	0.622731	0.770726	0.566967	0.981317	0.492343	0.384088	0.389215	0.548979	0.419736	0.678195	0.407616	0.50472	0.370198	0.597576	0.381671	0.520337	0.428318	0.643077	0.451736	0.8125	0.483934	0.622906	0.386933	0.775734	0.474782	0.709153	0.491454
O14578	CIT	Citron Rho-interacting kinase	0.21457	1.04591	0.169195	0.742088	0.171913	0.352635	0.231613	0.64022	0.231534	0.976186	0.300433	0.727458	0.242392	0.394365	0.20681	0.530906	0.35374	1.05175	0.348861	0.634774	NA	NA	NA	NA	NA	NA	NA	NA	NA	NA	0.231972	0.646865	0.249444	1.0935	0.122307	0.593488	0.235476	0.597955	0.185824	0.235665	0.206002	0.53622	0.26203	0.794059	0.21003	0.985256	0.304308
O14579	COPE	Coatomer subunit epsilon	0.379547	0.793208	0.298128	1.04645	0.338967	0.79352	0.372978	0.855804	0.363009	1.19755	0.431032	0.617122	0.253669	0.754467	0.372968	1.13516	0.420781	0.999409	0.437125	0.779377	0.689546	1.45175	0.509673	1.34486	0.403166	0.590022	0.424597	1.4645	0.375745	1.35588	0.464982	0.807699	0.665968	0.924158	0.450099	0.759043	0.741165	0.96899	0.387435	1.32622	0.180096	0.614996	0.160224	0.746537	0.157479	0.636324	0.274349
O14602	EIF1AY	Eukaryotic translation initiation factor 1A, Y-chromosomal	0.270597	0.386966	0.204729	0.683847	0.169253	0.327666	0.100678	0.476423	0.129694	0.372081	0.161148	0.430523	0.212221	0.375916	0.182819	0.613958	0.130583	0.509545	0.164752	0.570291	0.27561	0.373645	0.203794	0.426459	0.343209	0.391635	0.272953	0.333478	0.236468	0.359134	0.128713	0.119589	0.165164	0.46914	0.066594	0.340516	0.154986	0.354501	0.12198	0.621871	0.36473	0.442011	0.255748	0.506038	0.390536	0.510588	0.314292
O14607	UTY	Histone demethylase UTY	0.636115	1.23967	0.487537	1.28847	0.706479	1.28244	0.56943	1.15139	0.735479	1.66884	0.64599	0.826945	0.409775	0.641281	0.481729	0.813908	0.557808	0.902168	0.518815	0.724014	0.812542	1.55413	0.824706	1.50034	0.935735	0.875794	0.603298	1.20766	0.9035	1.3908	0.64185	1.37612	0.410931	0.924793	0.413363	0.908732	0.642884	1.1977	0.394207	1.00945	0.828413	0.814125	0.504884	1.00504	0.877195	1.0739	0.551558
O14610	GNGT2	Guanine nucleotide-binding protein G(I)/G(S)/G(O) subunit gamma-T2	NA	NA	NA	NA	NA	NA	NA	NA	NA	NA	NA	NA	NA	NA	NA	NA	NA	NA	NA	NA	NA	NA	NA	NA	NA	NA	NA	NA	NA	NA	NA	NA	NA	NA	NA	NA	NA	NA	NA	NA	NA	NA	NA	NA	NA	NA	NA
O14617	AP3D1	AP-3 complex subunit delta-1	0.50048	0.751615	0.360032	0.725672	0.498123	0.742673	0.506088	0.78131	0.562786	0.916046	0.678711	1.00771	0.466693	1.04533	0.519117	0.982832	0.694302	1.00092	0.663382	1.31113	0.693088	0.832276	0.708201	1.04655	0.648594	0.871856	0.604576	0.899123	0.641989	0.974688	0.703329	0.726522	0.582806	1.1309	0.51631	0.854777	0.751628	1.1604	0.530925	1.55706	0.521048	0.799107	0.48875	0.924351	0.494678	0.806876	0.530418
O14618	CCS	Copper chaperone for superoxide dismutase	0.942721	0.738602	0.571519	0.792955	0.723292	0.55392	0.628604	0.826005	0.622293	1.12464	0.8588	0.726022	0.54326	0.877321	0.570821	0.924174	0.601292	0.886493	0.694161	0.72342	0.859711	0.807808	0.694449	0.830074	0.874605	0.625026	0.676365	0.943433	0.77456	0.980894	0.732694	0.768452	0.719874	0.943095	0.785075	0.787526	0.915004	1.01339	0.621021	1.22687	0.891489	0.963713	0.636007	1.13709	0.710753	0.865849	0.703117
O14628	ZNF195	Zinc finger protein 195	0.322836	0.849946	0.384646	0.526982	0.316697	0.578435	0.39691	0.248153	0.225639	0.933429	NA	NA	NA	NA	NA	NA	NA	NA	NA	NA	0.286952	0.485054	0.432544	0.496758	0.769984	0.525272	0.402036	0.396374	0.485494	0.485934	NA	NA	NA	NA	NA	NA	NA	NA	NA	NA	NA	NA	NA	NA	NA	NA	NA
O14638	ENPP3	Ectonucleotide pyrophosphatase/phosphodiesterase family member 3	NA	NA	NA	NA	NA	NA	NA	NA	NA	NA	NA	NA	NA	NA	NA	NA	NA	NA	NA	NA	NA	NA	NA	NA	NA	NA	NA	NA	NA	NA	NA	NA	NA	NA	NA	NA	NA	NA	NA	NA	0.769575	1.37066	0.567879	1.59785	0.915924	1.37396	0.924674
O14639	ABLIM1	Actin-binding LIM protein 1	2.01771	1.391	1.56535	0.972797	1.35087	0.980569	1.45475	0.851431	1.88536	1.1393	1.47268	0.978421	1.32716	0.644169	1.14208	1.07127	1.2295	1.26263	1.14416	1.40049	0.346758	0.610163	0.418589	0.307428	0.422832	0.284247	0.207461	0.237447	0.275125	0.294537	0.40693	0.306417	0.408622	0.939143	0.289624	0.562826	0.50251	0.826586	0.248887	0.423879	0.365716	0.550034	0.302959	0.643103	0.427987	0.57482	0.47247
O14641	DVL2	Segment polarity protein dishevelled homolog DVL-2	0.545234	0.560903	0.378483	0.506876	0.439567	0.467106	0.395853	0.653	0.425744	0.552906	0.544471	0.407425	0.47623	0.402349	0.407723	0.511429	0.618651	0.537936	0.559865	0.59231	0.651484	0.500217	0.690336	0.539264	0.830859	0.744549	0.657632	0.657887	0.825536	0.540868	0.813106	0.52584	0.465838	0.603854	0.444085	0.613562	0.765875	0.652322	0.521381	0.563735	NA	NA	NA	NA	NA	NA	NA
O14646	CHD1	Chromodomain-helicase-DNA-binding protein 1	NA	NA	NA	NA	NA	NA	NA	NA	NA	NA	NA	NA	NA	NA	NA	NA	NA	NA	NA	NA	1.93278	0.715213	3.75543	0.853786	3.53809	0.738309	1.78921	1.20855	1.84689	0.881478	NA	NA	NA	NA	NA	NA	NA	NA	NA	NA	0.220169	0.318745	0.227944	0.519622	0.280319	0.697964	0.359346
O14647	CHD2	Chromodomain-helicase-DNA-binding protein 2	0.574001	1.42931	0.492319	1.05872	0.625839	0.84885	0.616017	1.00428	0.6739	1.13549	0.519674	0.614375	0.392595	0.589962	0.407088	0.65623	0.342136	0.842497	0.53472	0.660176	NA	NA	NA	NA	NA	NA	NA	NA	NA	NA	0.719476	0.597273	0.571436	0.728425	0.496516	0.806893	0.591306	0.943853	0.716972	0.774664	NA	NA	NA	NA	NA	NA	NA
O14653	GOSR2	Golgi SNAP receptor complex member 2	NA	NA	NA	NA	NA	NA	NA	NA	NA	NA	NA	NA	NA	NA	NA	NA	NA	NA	NA	NA	NA	NA	NA	NA	NA	NA	NA	NA	NA	NA	NA	NA	NA	NA	NA	NA	NA	NA	NA	NA	NA	NA	NA	NA	NA	NA	NA
O14656	TOR1A	Torsin-1A	0.52619	0.838903	0.314138	0.888753	0.399965	0.825146	0.322572	0.894017	0.516593	1.02114	0.525064	0.581521	0.458846	0.958495	0.40097	1.01215	0.695464	1.08892	0.673995	0.93966	0.579341	1.64084	0.617768	1.60348	0.651848	0.721995	0.653057	2.03372	0.816724	2.04066	0.591339	1.3462	0.394107	0.687357	0.35515	0.707905	0.537845	0.853902	0.36179	1.68396	0.361004	0.718532	0.339763	0.77363	0.33265	0.817906	0.437307
O14657	TOR1B	Torsin-1B	0.410657	0.859747	0.300477	0.989224	0.348242	0.639226	0.289016	1.00076	0.387509	1.0222	0.585484	0.676273	0.376803	0.656409	0.449322	0.675758	0.379398	1.20337	0.421737	0.709204	0.358031	0.867177	0.435922	1.2428	0.35712	0.426012	0.329605	0.78124	0.302777	1.16815	0.464943	1.3678	0.440514	0.897342	0.365347	0.692308	0.429501	0.892693	0.312933	0.789706	0.320581	0.723746	0.353948	1.12112	0.318734	0.962764	0.42049
O14662	STX16	Syntaxin-16	0.666266	0.830711	0.6278	1.05492	0.657469	0.672003	0.677232	1.07042	0.746597	0.798085	NA	NA	NA	NA	NA	NA	NA	NA	NA	NA	0.543007	0.847866	0.411899	0.6746	0.456831	0.749307	0.374721	0.54403	0.387858	0.453789	0.248504	0.302795	0.328692	1.1743	0.0351184	0.93436	0.370361	1.09497	0.174273	1.94645	0.164832	0.853005	0.158146	0.82438	0.184083	0.327909	0.333074
O14672	ADAM10	Disintegrin and metalloproteinase domain-containing protein 10	1.16531	2.49414	0.736858	1.45712	0.858268	1.36359	1.01659	1.62957	1.01578	1.4753	1.66043	2.49296	0.910119	2.31984	1.29334	1.49452	1.35605	4.37547	1.2769	2.63041	1.11926	1.17521	1.07508	1.95886	0.996431	1.3784	0.983233	1.79277	1.06104	1.54789	1.4992	2.23142	1.22946	1.47515	1.17542	1.9637	1.38786	2.48074	0.991209	2.48503	0.96652	1.42992	0.944754	1.98899	0.997983	2.30887	0.907752
O14678	ABCD4	ATP-binding cassette sub-family D member 4	NA	NA	NA	NA	NA	NA	NA	NA	NA	NA	1.47828	1.36172	0.877907	1.62861	1.18134	1.36882	0.910034	1.26262	1.51065	1.82563	NA	NA	NA	NA	NA	NA	NA	NA	NA	NA	1.59754	1.04994	1.14345	1.51335	0.718991	1.28334	1.92895	1.90437	1.02043	4.06638	NA	NA	NA	NA	NA	NA	NA
O14681	EI24	Etoposide-induced protein 2.4 homolog	0.71303	1.08901	0.447743	1.0734	0.653482	0.774276	0.502944	0.986684	0.655478	0.846123	0.639572	0.793197	0.439443	0.628826	0.52701	0.858921	0.512644	1.1356	0.59479	1.01368	NA	NA	NA	NA	NA	NA	NA	NA	NA	NA	0.659939	0.84007	0.53024	0.890326	0.524684	0.838474	0.572831	1.0143	0.509481	1.9272	0.579634	0.894933	0.4213	0.752055	0.574654	0.781984	0.712214
O14683	TP53I11	Tumor protein p53-inducible protein 11	2.503	5.261	1.61253	3.07653	3.20685	3.66966	1.47513	8.44121	1.89242	3.64246	2.94795	2.332	2.12105	2.65694	2.73742	5.51579	1.63426	7.01401	2.08649	4.08556	1.11184	4.45208	2.19362	5.79778	2.88577	2.66958	3.97	2.70882	2.37141	11.0742	NA	NA	NA	NA	NA	NA	NA	NA	NA	NA	NA	NA	NA	NA	NA	NA	NA
O14684	PTGES	Prostaglandin E synthase	0.407967	2.15678	0.419375	2.92579	0.609083	0.624499	0.797311	0.570852	0.540174	0.742647	0.319684	0.440521	0.303029	0.582812	0.279955	0.871269	0.486264	1.6091	0.519988	0.86308	0.607483	0.415123	0.752514	0.439882	0.400812	0.341361	0.311974	0.507538	0.399281	0.934836	0.40547	0.316306	0.380888	0.34482	0.215621	0.460843	0.689704	0.461197	0.293687	0.377831	0.489568	0.79429	0.292455	0.6462	0.572071	1.02355	0.444718
O14686	KMT2D	Histone-lysine N-methyltransferase 2D	NA	NA	NA	NA	NA	NA	NA	NA	NA	NA	NA	NA	NA	NA	NA	NA	NA	NA	NA	NA	NA	NA	NA	NA	NA	NA	NA	NA	NA	NA	NA	NA	NA	NA	NA	NA	NA	NA	NA	NA	0.559022	1.15449	0.536089	1.41546	0.707367	1.27004	0.729467
O14713	ITGB1BP1	Integrin beta-1-binding protein 1	0.912258	0.781887	0.663869	1.03927	0.770793	0.941621	0.910781	0.959517	0.844679	1.16767	NA	NA	NA	NA	NA	NA	NA	NA	NA	NA	NA	NA	NA	NA	NA	NA	NA	NA	NA	NA	NA	NA	NA	NA	NA	NA	NA	NA	NA	NA	NA	NA	NA	NA	NA	NA	NA
O14715	RGPD8	RANBP2-like and GRIP domain-containing protein 8	NA	NA	NA	NA	NA	NA	NA	NA	NA	NA	NA	NA	NA	NA	NA	NA	NA	NA	NA	NA	NA	NA	NA	NA	NA	NA	NA	NA	NA	NA	NA	NA	NA	NA	NA	NA	NA	NA	NA	NA	NA	NA	NA	NA	NA	NA	NA
O14727	APAF1	Apoptotic protease-activating factor 1	0.651043	1.0059	0.466201	1.03535	0.530959	0.93919	0.691159	1.01327	0.803501	1.08347	0.703945	1.02148	0.54117	1.0051	0.483726	0.966518	0.689359	1.21081	0.702076	0.775327	0.690972	1.09798	0.780933	0.926764	0.612361	0.914892	0.615409	1.13167	0.619901	1.0977	0.810923	1.65005	0.656949	0.887446	0.498194	0.930328	0.688041	0.88426	0.562769	0.78931	0.674175	1.05233	0.673487	1.06264	0.570169	1.1034	0.700378
O14730	RIOK3	Serine/threonine-protein kinase RIO3	NA	NA	NA	NA	NA	NA	NA	NA	NA	NA	0.602033	1.33672	0.509149	0.853677	0.561683	1.36655	0.727491	1.0975	0.684321	1.14818	NA	NA	NA	NA	NA	NA	NA	NA	NA	NA	0.710799	1.72091	0.740232	1.17253	0.634163	0.874839	0.63324	1.2695	0.611622	0.931444	NA	NA	NA	NA	NA	NA	NA
O14732	IMPA2	Inositol monophosphatase 2	0.543974	0.910322	0.666582	1.44086	0.38719	1.29901	0.566572	1.04418	1.17742	2.26736	0.964483	1.83651	0.444376	0.891688	0.837439	1.04056	1.07984	1.3195	0.400266	1.83011	0.994715	1.11348	0.759099	1.64391	0.344407	0.667185	0.423753	0.66543	0.479003	1.41285	0.806446	2.40793	1.37658	1.51691	0.876815	1.38679	0.63911	1.84291	0.523967	0.602409	0.438726	0.871776	0.86841	1.94345	0.636769	3.09767	0.580839
O14733	MAP2K7	Dual specificity mitogen-activated protein kinase kinase 7	0.947775	1.10913	0.407785	1.11017	0.653158	0.90077	0.522754	0.878923	0.588757	1.16705	0.453017	0.677377	0.285664	0.737157	0.343426	0.862582	0.278954	0.930058	0.386512	0.768541	0.52201	0.882884	0.532245	0.769629	0.676276	0.77997	0.631476	0.646669	0.919574	0.751957	0.413095	0.609195	0.396917	0.840221	0.914021	0.667168	0.491744	1.04306	0.494846	0.736909	0.512221	0.777048	0.480487	1.01871	0.616343	0.895635	0.485614
O14734	ACOT8	Acyl-coenzyme A thioesterase 8	0.496901	2.73981	0.318345	2.86166	0.77732	2.23922	0.642353	2.81157	0.893075	1.98223	0.638949	1.30442	0.491385	1.40318	0.579021	1.15707	0.767554	1.14746	0.636788	1.35276	NA	NA	NA	NA	NA	NA	NA	NA	NA	NA	NA	NA	NA	NA	NA	NA	NA	NA	NA	NA	0.912121	0.959244	0.561835	0.943381	0.490287	1.08423	0.497397
O14735	CDIPT	CDP-diacylglycerol--inositol 3-phosphatidyltransferase	1.48878	1.3334	0.835578	1.14682	2.44855	1.35899	0.969855	1.05684	1.14509	1.17809	1.70269	1.38011	0.998261	1.11873	1.06875	1.20581	1.22131	2.11584	1.34164	1.28079	1.54396	1.22455	1.46446	2.09071	2.66967	1.56169	1.54211	1.96662	1.8412	1.30365	1.53281	1.08921	1.15846	1.21701	0.975308	1.4717	1.96781	1.73665	1.07875	1.6065	1.20394	1.01875	1.01972	1.16931	0.956993	0.873113	1.0805
O14737	PDCD5	Programmed cell death protein 5	0.189109	0.193732	0.128613	0.326433	0.141751	0.197075	0.140389	0.307836	0.126348	0.21848	0.108019	0.236074	0.0931244	0.23206	0.130248	0.330777	0.143183	0.321584	0.161834	0.288823	0.316777	0.504198	0.300254	0.628739	0.301294	0.259635	0.219901	0.396462	0.259982	0.545369	0.170445	0.234118	0.226184	0.391417	0.14406	0.285473	0.218508	0.412667	0.149428	0.401003	0.109297	0.239386	0.0675486	0.223154	0.0998328	0.274189	0.113522
O14744	PRMT5	Protein arginine N-methyltransferase 5	0.388958	0.642533	0.314091	0.819014	0.376568	0.480164	0.349524	0.531649	0.369432	0.883523	0.35941	0.535985	0.302282	0.499733	0.279635	0.541762	0.378491	0.541523	0.357087	0.689035	0.344912	0.60102	0.384771	0.684835	0.329105	0.568907	0.291645	0.460846	0.386573	0.687143	0.369334	0.558681	0.34601	0.501001	0.281674	0.484151	0.416722	0.652266	0.293826	0.766074	0.321102	0.418607	0.292733	0.598235	0.297299	0.558119	0.333888
O14745	SLC9A3R1	Na(+)/H(+) exchange regulatory cofactor NHE-RF1	0.404196	0.577961	0.700824	0.955627	0.383902	1.02608	0.710725	0.910941	1.03896	1.94165	0.842768	1.70989	0.569154	1.46478	0.837033	1.4746	1.03947	0.880549	0.790548	0.912191	1.21828	1.22131	0.860403	1.1499	0.361894	0.635994	0.428316	1.00851	0.376626	1.3803	0.706668	1.02886	0.829552	1.04278	0.695431	1.12168	0.878702	1.11827	0.484037	0.621529	0.492385	1.26534	0.727831	1.16785	0.672316	0.999951	0.93918
O14756	HSD17B6	17-beta-hydroxysteroid dehydrogenase type 6	NA	NA	NA	NA	NA	NA	NA	NA	NA	NA	NA	NA	NA	NA	NA	NA	NA	NA	NA	NA	NA	NA	NA	NA	NA	NA	NA	NA	NA	NA	NA	NA	NA	NA	NA	NA	NA	NA	NA	NA	NA	NA	NA	NA	NA	NA	NA
O14757	CHEK1	Serine/threonine-protein kinase Chk1	NA	NA	NA	NA	NA	NA	NA	NA	NA	NA	NA	NA	NA	NA	NA	NA	NA	NA	NA	NA	NA	NA	NA	NA	NA	NA	NA	NA	NA	NA	NA	NA	NA	NA	NA	NA	NA	NA	NA	NA	NA	NA	NA	NA	NA	NA	NA
O14770	MEIS2	Homeobox protein Meis2	1.88214	1.72268	1.20905	1.07007	2.14584	1.59558	1.16735	0.797938	1.7504	1.53731	0.91532	1.22446	0.663837	0.969723	0.606662	1.38173	0.723178	1.75356	0.974878	2.21683	0.994306	2.1145	1.11378	1.20467	2.35615	1.94471	0.946705	1.1627	1.70981	1.08531	0.960754	0.737234	0.68049	1.12702	0.971867	1.55669	1.10332	1.07891	1.0768	1.17865	1.05981	1.51847	0.510309	1.36178	0.980882	1.56091	0.918197
O14772	FPGT	Fucose-1-phosphate guanylyltransferase	0.966017	0.999173	0.655267	1.05143	0.836091	1.14203	0.739525	1.44932	0.832273	1.33642	0.623297	1.30796	0.556288	1.06519	0.554361	1.16695	0.721732	1.42252	0.655661	1.24875	0.828791	1.67625	1.05902	1.60268	0.913942	1.20104	1.02704	1.39598	0.69753	1.1793	0.959739	1.11768	0.84206	1.30029	0.585913	0.890932	0.905748	1.4604	0.663238	1.8765	NA	NA	NA	NA	NA	NA	NA
O14773	TPP1	Tripeptidyl-peptidase 1	2.16131	3.73856	0.784601	2.41834	2.20042	1.64506	1.67565	2.94697	2.36404	2.67593	1.16585	1.95784	1.05833	2.82486	1.46785	1.79131	1.55857	2.35151	1.37067	1.57255	2.10442	2.05506	2.08091	2.17828	1.39101	1.92668	1.17033	3.19402	2.16762	2.7427	3.04109	2.92451	2.05478	3.14217	1.2298	3.75748	3.44012	3.86574	1.81275	4.16092	0.877028	1.5101	0.997058	2.5749	0.834724	1.314	1.0259
O14776	TCERG1	Transcription elongation regulator 1	0.340102	0.686494	0.253551	0.731786	0.394393	0.446449	0.262755	0.334953	0.268841	0.627851	0.205974	0.415356	0.191131	0.390259	0.169442	0.533592	0.183241	0.558382	0.254463	0.575251	0.334888	0.647413	0.313974	0.646811	0.357324	0.490678	0.209686	0.449563	0.272013	0.446837	0.261174	0.364901	0.290682	0.782263	0.192487	0.404677	0.282594	0.670993	0.246052	0.728396	0.227554	0.509645	0.177155	0.69302	0.195785	0.511688	0.19277
O14777	NDC80	Kinetochore protein NDC80 homolog	NA	NA	NA	NA	NA	NA	NA	NA	NA	NA	NA	NA	NA	NA	NA	NA	NA	NA	NA	NA	0.459302	0.603287	0.370403	0.562515	0.314946	0.650279	0.250531	0.509403	0.270374	0.584086	0.250062	0.317533	0.222126	0.492046	0.182837	0.325177	0.219379	0.445068	0.218151	0.263051	0.143035	0.55659	0.14961	0.437999	0.109552	0.389874	0.186385
O14782	KIF3C	Kinesin-like protein KIF3C	0.597537	0.970799	0.423378	0.816464	0.486039	0.726783	0.431014	0.821393	0.476599	0.674547	0.811609	0.713271	0.614489	0.907679	1.00212	0.988164	0.850323	0.948464	0.865365	1.0218	0.3603	0.617797	0.451634	0.51054	0.402215	0.565785	0.351149	0.50148	0.47915	0.617797	0.448632	0.71491	0.44183	0.807963	0.369989	0.767426	0.522254	0.938608	0.375365	1.27595	0.399542	0.591899	0.406331	0.856041	0.372719	0.7191	0.419399
O14786	NRP1	Neuropilin-1	2.59958	1.7745	1.43054	1.33246	2.38073	1.78077	2.22068	2.05715	1.89304	1.98137	3.02353	2.96827	2.26819	2.74436	2.49017	2.05911	2.6546	2.4588	2.76185	1.26795	2.15696	2.05202	2.8286	1.79325	2.63182	2.67352	2.54787	2.12691	2.46238	1.88264	1.55883	1.45131	1.4903	1.55909	1.09653	1.52387	2.03178	1.50696	0.8899	1.81879	3.22878	2.12916	2.30511	1.96966	2.11751	2.12238	2.08425
O14787	TNPO2	Transportin-2	0.585813	0.836514	0.563187	0.849495	0.629168	0.78971	0.510879	0.524112	0.59485	1.09262	0.518317	0.537089	0.448791	0.509942	0.436917	0.744068	0.51947	0.843775	0.5257	0.699747	0.584954	0.913636	0.599568	0.744714	0.641058	0.932901	0.585894	0.700498	0.684569	0.676769	0.502426	0.491294	0.50974	0.699194	0.353026	0.770158	0.500178	0.870344	0.436278	0.987263	0.419409	0.660184	0.34204	0.895904	0.322658	0.516383	0.442123
O14791	APOL1	Apolipoprotein L1	NA	NA	NA	NA	NA	NA	NA	NA	NA	NA	1.51668	1.84046	1.58305	1.03031	1.73912	1.80751	3.20594	1.42584	1.49837	1.79484	0.809673	1.53941	1.20657	1.12197	1.21231	1.56909	0.93184	1.84183	0.799563	2.15432	5.26637	6.29027	3.2118	2.25746	2.49528	1.90737	3.44307	3.81652	2.62732	1.04133	3.30375	2.48136	2.59533	3.02417	2.7669	2.37747	2.64529
O14795	UNC13B	Protein unc-13 homolog B	NA	NA	NA	NA	NA	NA	NA	NA	NA	NA	0.428838	0.878165	0.390054	0.815789	0.445266	0.703428	0.261779	0.75654	0.48517	0.883392	NA	NA	NA	NA	NA	NA	NA	NA	NA	NA	0.707868	1.07066	0.546382	1.03808	0.646622	0.898742	0.608599	1.27733	0.59766	1.2134	NA	NA	NA	NA	NA	NA	NA
O14802	POLR3A	DNA-directed RNA polymerase III subunit RPC1	0.499539	0.982224	0.420764	1.22779	0.558551	0.707319	0.524892	0.822138	0.43022	1.09966	0.398249	0.672877	0.351568	0.737072	0.352018	0.812706	0.454161	0.856872	0.431592	0.673256	0.443601	0.590213	0.485848	0.717271	0.504786	0.848012	0.258487	0.696681	0.327879	0.865278	0.42736	0.51315	0.376483	0.699394	0.342415	0.603054	0.427436	0.719271	0.329991	0.678445	0.475502	0.61397	0.350042	0.694249	0.366376	0.639721	0.454289
O14807	MRAS	Ras-related protein M-Ras	NA	NA	NA	NA	NA	NA	NA	NA	NA	NA	NA	NA	NA	NA	NA	NA	NA	NA	NA	NA	NA	NA	NA	NA	NA	NA	NA	NA	NA	NA	NA	NA	NA	NA	NA	NA	NA	NA	NA	NA	1.3054	1.12197	0.863103	1.01637	1.20187	1.11342	1.31015
O14815	CAPN9	Calpain-9	NA	NA	NA	NA	NA	NA	NA	NA	NA	NA	NA	NA	NA	NA	NA	NA	NA	NA	NA	NA	NA	NA	NA	NA	NA	NA	NA	NA	NA	NA	NA	NA	NA	NA	NA	NA	NA	NA	NA	NA	NA	NA	NA	NA	NA	NA	NA
O14818	PSMA7	Proteasome subunit alpha type-7	0.414502	0.517267	0.255947	0.921419	0.341526	0.614938	0.385759	0.898478	0.401446	1.09815	0.396353	0.693273	0.274555	0.68781	0.291677	0.715533	0.398829	0.783793	0.441141	0.81317	0.453453	0.815902	0.385303	0.681369	0.379654	0.403507	0.364987	0.879326	0.463523	0.982314	0.357117	0.818896	0.337995	0.773189	0.269935	0.673344	0.405985	0.906374	0.276068	0.82162	0.347881	0.741271	0.294026	0.869752	0.345928	0.769917	0.443994
O14828	SCAMP3	Secretory carrier-associated membrane protein 3	0.44036	1.03191	0.395877	1.36012	0.363249	0.590022	0.386629	1.48784	0.520043	0.917972	0.28822	0.859791	0.302025	0.553213	0.297433	0.836891	0.389915	0.855128	0.424986	0.760872	0.618335	0.818982	0.634133	1.12477	0.592251	1.08168	0.528724	0.94369	0.624379	0.788762	0.604479	0.802204	0.545246	1.18826	0.439107	0.801392	0.759854	1.37348	0.43893	2.99085	0.643315	0.725254	0.631253	1.54406	0.562734	0.77014	0.595781
O14832	PHYH	Phytanoyl-CoA dioxygenase, peroxisomal	0.35653	0.607274	0.247112	0.334718	0.299244	0.292394	0.226228	0.535156	0.310887	0.33566	NA	NA	NA	NA	NA	NA	NA	NA	NA	NA	NA	NA	NA	NA	NA	NA	NA	NA	NA	NA	0.357659	0.329973	0.367106	0.393713	0.337888	0.418514	0.33439	0.340457	0.347398	0.766301	0.210313	0.276028	0.182026	0.365904	0.24852	0.423433	0.296122
O14841	OPLAH	5-oxoprolinase	1.45007	1.49038	1.48957	1.80489	1.37583	2.39536	1.28279	1.73902	1.66698	3.05779	1.30512	1.53025	0.785459	1.093	1.09003	2.94438	1.61813	2.43899	1.17866	2.53814	1.66692	1.46156	1.82609	4.15401	1.0199	1.5063	1.38676	1.95137	1.91168	2.41554	1.08746	1.39697	1.08809	1.3641	1.12282	1.54589	1.23432	3.09692	1.20822	3.25337	0.996061	1.15306	1.22574	2.88157	1.25859	1.20865	1.17695
O14867	BACH1	Transcription regulator protein BACH1	NA	NA	NA	NA	NA	NA	NA	NA	NA	NA	1.25745	1.53438	0.895169	1.34113	1.05254	1.57306	1.14133	1.25428	0.911677	1.17962	NA	NA	NA	NA	NA	NA	NA	NA	NA	NA	NA	NA	NA	NA	NA	NA	NA	NA	NA	NA	NA	NA	NA	NA	NA	NA	NA
O14874	BCKDK	[3-methyl-2-oxobutanoate dehydrogenase [lipoamide]] kinase, mitochondrial	NA	NA	NA	NA	NA	NA	NA	NA	NA	NA	0.511599	0.837735	0.381095	1.04907	0.542793	0.970726	0.577576	1.19771	0.512197	1.06349	0.706046	1.04718	0.701756	1.22711	0.799756	0.994875	0.487606	1.24928	0.404371	1.07746	0.791881	0.662673	0.883476	1.04687	0.462541	0.89537	0.875971	1.23867	0.638666	1.88953	0.751353	0.912514	0.625419	1.31074	0.698297	0.99361	0.730029
O14879	IFIT3	Interferon-induced protein with tetratricopeptide repeats 3	1.57038	8.0405	0.963125	4.6539	1.43046	1.38416	1.43905	7.32539	1.36033	4.37717	1.23068	6.9587	1.19369	2.17217	0.935875	2.14038	1.43465	2.06813	1.48371	1.14199	1.07916	4.6089	1.40825	1.80081	1.32827	2.75335	1.09472	4.1101	1.11775	8.70096	1.45453	4.90023	0.945795	1.96668	0.878804	2.05276	1.55496	2.45729	0.97857	0.975629	1.13999	3.76333	1.57979	7.19817	1.17732	1.80452	1.16765
O14880	MGST3	Microsomal glutathione S-transferase 3	1.90669	2.52009	1.19193	2.61888	3.51545	2.43831	1.47629	2.61349	1.72316	2.48756	1.92589	2.21115	1.39795	1.91622	1.65164	1.71667	2.02628	2.32922	1.33848	2.00938	1.36254	1.52049	1.80243	1.99039	2.11855	1.79005	1.52108	1.4257	1.5394	1.3596	1.16569	1.70777	1.26364	1.65783	1.43266	1.82214	1.73464	1.53772	1.03554	5.65036	1.27054	0.932462	1.24213	1.34419	1.17648	1.18868	0.887854
O14893	GEMIN2	Gem-associated protein 2	0.34762	0.794625	0.299851	0.698273	0.347491	0.415392	0.302531	0.500992	0.387059	0.596443	0.387793	0.511132	0.321835	0.325907	0.369776	0.397395	0.338732	0.43773	0.378124	0.498537	0.349373	0.517963	0.333467	0.587032	0.365294	0.578687	0.236683	0.400687	0.269339	0.453021	0.338192	0.331562	0.280444	0.533339	0.229992	0.448422	0.359429	0.593513	0.285567	0.487803	NA	NA	NA	NA	NA	NA	NA
O14896	IRF6	Interferon regulatory factor 6	0.869568	3.26827	0.877681	2.98026	0.813299	1.97096	0.770772	3.14251	0.94073	1.85916	0.893671	6.33599	0.755996	2.62487	0.931647	3.21005	1.17816	4.0036	1.19977	3.56269	1.44785	6.54898	1.24623	4.18241	1.03924	4.93008	0.704023	2.17018	0.919321	4.39417	0.870544	1.69363	0.97055	4.55221	0.538453	1.61851	0.920311	3.06688	0.616988	1.33682	1.11398	3.05878	1.08965	6.439	1.29711	4.06672	1.32225
O14907	TAX1BP3	Tax1-binding protein 3	0.824435	1.35645	0.663398	0.778012	0.629027	0.97924	0.645113	1.00513	0.798772	0.984648	0.738421	1.22599	0.696305	0.993604	0.674336	1.2904	0.772462	1.60034	1.16647	2.60549	1.37084	1.29924	1.25489	2.13075	1.00369	0.999818	0.762206	0.921082	0.866415	1.60281	1.46248	2.34787	1.21858	2.72974	1.12335	1.81432	1.17944	2.02034	1.04214	0.932746	1.18405	1.74891	0.95423	1.49613	1.04045	2.20709	1.05915
O14908	GIPC1	PDZ domain-containing protein GIPC1	0.374336	0.464865	0.349747	0.570408	0.344053	0.647331	0.376106	0.579877	0.500714	0.732614	0.336828	0.902343	0.307484	0.72026	0.313096	0.898385	0.438936	0.763801	0.453063	0.963055	0.469783	0.983775	0.373527	0.856883	0.320124	0.491859	0.300066	0.653564	0.337186	0.794576	0.320592	0.713412	0.371045	1.04194	0.310258	0.673444	0.39267	1.15145	0.255153	0.83193	0.286282	0.817851	0.295623	1.03403	0.278694	1.27055	0.427371
O14910	LIN7A	Protein lin-7 homolog A	NA	NA	NA	NA	NA	NA	NA	NA	NA	NA	NA	NA	NA	NA	NA	NA	NA	NA	NA	NA	1.12407	1.51394	1.07007	1.38383	1.43958	1.02764	1.04842	1.103	1.37919	1.27255	NA	NA	NA	NA	NA	NA	NA	NA	NA	NA	1.08134	1.49615	1.32082	1.53817	1.74473	1.76701	1.4303
O14920	IKBKB	Inhibitor of nuclear factor kappa-B kinase subunit beta	0.717111	0.989474	0.442746	1.35956	0.928215	1.66308	1.08192	0.827305	1.03063	1.24567	0.79584	1.30277	0.670255	1.40314	0.498718	1.58243	0.85229	2.09469	0.958538	2.01681	0.790398	1.42299	0.949081	1.25818	1.08384	1.38713	0.571735	1.08153	0.966383	1.25236	0.712653	1.33049	0.731989	1.3493	0.601498	1.37827	1.14974	1.40063	0.549512	0.903364	0.676689	1.29636	0.574873	1.32709	0.808201	1.40976	0.811086
O14925	TIMM23	Mitochondrial import inner membrane translocase subunit Tim23	0.87871	1.30865	0.668584	0.963479	0.822933	0.809258	0.767688	0.953126	0.91636	1.1213	0.455187	0.804534	0.363781	1.01354	0.393317	0.88637	0.52863	0.942835	0.479064	0.655454	0.35612	0.595654	0.356004	0.735394	0.365968	0.637489	0.248912	0.615119	0.326487	0.646059	NA	NA	NA	NA	NA	NA	NA	NA	NA	NA	NA	NA	NA	NA	NA	NA	NA
O14929	HAT1	Histone acetyltransferase type B catalytic subunit	0.186264	0.576028	0.185729	0.618329	0.175232	0.423053	0.2164	0.543572	0.210397	1.12488	0.214544	0.475903	0.167392	0.385672	0.188225	0.49663	0.183877	0.642026	0.184438	0.334634	0.193732	0.463958	0.211808	0.726278	0.166786	0.54048	0.169373	0.390649	0.187897	0.532106	0.233352	0.67628	0.249619	0.62427	0.202856	0.366288	0.262624	0.608937	0.185169	0.254589	0.175495	0.422511	0.158312	0.600749	0.165971	0.711813	0.208507
O14933	UBE2L6	Ubiquitin/ISG15-conjugating enzyme E2 L6	1.18023	3.59566	0.943475	2.94862	1.17748	1.76988	1.15743	3.4599	1.12205	3.46322	1.63908	4.76753	1.67193	3.1088	1.32815	3.77341	1.67582	3.21274	1.83503	2.58881	0.848821	3.73433	0.954332	1.61041	0.789587	1.86553	0.850205	2.79613	0.837486	2.45757	2.9538	4.62549	2.27177	5.03096	1.6831	3.9904	2.7758	6.25566	1.57646	2.71244	1.71476	5.04125	1.60528	9.65377	1.67888	2.6626	2.17576
O14936	CASK	Peripheral plasma membrane protein CASK	1.07919	1.56001	0.890371	1.13727	0.911018	1.8814	0.958843	1.37501	1.31951	2.29095	0.841867	1.31335	0.570178	0.920052	0.615976	1.74374	0.784037	2.25764	0.794712	1.90537	1.38138	1.94456	1.32503	1.4756	0.905979	1.66739	0.866332	1.0139	0.976307	1.28621	1.21871	2.06031	1.17168	1.6284	0.833441	2.26262	0.965097	2.72898	1.01109	2.73142	0.929061	2.1134	0.988443	1.66423	0.939175	2.13548	1.03125
O14939	PLD2	Phospholipase D2	1.28414	1.18351	0.729927	0.978445	1.22197	1.17645	1.4297	1.25912	1.22692	1.16304	0.941553	0.882778	0.840623	1.09435	0.743418	1.08189	0.934736	1.45069	1.04247	1.46166	NA	NA	NA	NA	NA	NA	NA	NA	NA	NA	NA	NA	NA	NA	NA	NA	NA	NA	NA	NA	1.22259	1.16604	0.871526	1.86477	1.10718	1.38163	1.29825
O14948	TFEC	Transcription factor EC	0.950335	1.29204	0.410799	0.78353	0.588297	0.920815	0.384329	0.664997	0.72833	0.807817	NA	NA	NA	NA	NA	NA	NA	NA	NA	NA	NA	NA	NA	NA	NA	NA	NA	NA	NA	NA	NA	NA	NA	NA	NA	NA	NA	NA	NA	NA	NA	NA	NA	NA	NA	NA	NA
O14949	UQCRQ	Cytochrome b-c1 complex subunit 8	0.275996	0.780218	0.208577	0.901466	0.276098	0.416443	0.191748	0.5508	0.270866	1.07213	0.365009	0.457415	0.258842	0.656114	0.349354	1.03569	0.38366	1.31331	0.391084	0.858456	0.291926	0.48256	0.233125	0.743515	0.296154	0.27398	0.22312	0.382685	0.215235	0.579689	0.358995	0.508167	0.323916	0.426459	0.326161	0.467351	0.368784	0.956732	0.301811	0.711871	0.303589	0.582163	0.245255	0.704042	0.394553	0.562132	0.3001
O14950	MYL12B	Myosin regulatory light chain 12B	1.40624	2.00789	0.918622	0.698655	0.528616	0.476267	0.347341	0.597899	0.353655	0.486217	0.411979	0.864038	0.656457	0.701643	0.538084	1.1411	0.4659	0.785983	0.518373	0.614927	0.495053	1.4068	0.551864	1.16769	1.41914	0.578947	0.744948	1.04539	1.14745	1.31245	0.363088	0.695115	0.291429	1.18181	0.35786	1.36167	0.297439	0.949591	0.55673	0.823245	0.378865	0.411198	0.381413	0.743872	0.442648	0.889575	0.441489
O14958	CASQ2	Calsequestrin-2	NA	NA	NA	NA	NA	NA	NA	NA	NA	NA	NA	NA	NA	NA	NA	NA	NA	NA	NA	NA	1.61664	1.29595	1.77468	2.24358	9.53086	2.93824	3.65861	1.43144	4.99765	2.40965	NA	NA	NA	NA	NA	NA	NA	NA	NA	NA	NA	NA	NA	NA	NA	NA	NA
O14964	HGS	Hepatocyte growth factor-regulated tyrosine kinase substrate	0.497685	0.680132	0.383804	0.868388	0.333445	0.558617	0.329245	0.77988	0.553186	0.696736	0.380126	0.753045	0.372953	0.597269	0.322701	0.720254	0.319574	0.675135	0.483066	0.783944	0.519085	0.715862	0.49138	0.664229	0.598475	0.592758	0.404592	0.631915	0.525548	0.644044	0.52211	0.57535	0.369653	0.840229	0.303078	0.630631	0.479131	0.723723	0.640426	0.907994	0.470835	0.564411	0.334165	0.842343	0.408611	0.708768	0.475767
O14966	RAB29	Ras-related protein Rab-7L1	0.667894	1.10427	0.401892	1.22583	0.577748	0.893959	0.56437	1.14044	1.11685	1.13722	0.448991	0.814599	0.364675	1.07753	0.322976	0.98858	0.400774	0.929945	0.517542	0.877425	0.681498	1.37037	0.825676	1.24095	0.750878	1.204	0.761873	1.57611	1.09996	1.1975	1.03286	1.63277	1.33685	2.06474	0.661125	1.79942	1.2919	1.54396	0.680792	1.54698	0.435785	0.703069	0.401488	1.57916	0.362476	0.70056	0.448587
O14972	VPS26C	Vacuolar protein sorting-associated protein 26C	0.840564	1.06623	0.454867	0.967588	0.769738	0.792211	0.86038	1.28308	0.771145	1.22495	0.694456	0.951835	0.539297	1.54346	0.524607	1.32829	0.756939	1.58662	0.806594	1.46074	1.11045	1.44629	1.1144	1.65803	0.970548	1.2307	0.850404	1.7948	1.08135	1.15809	1.10571	1.00127	0.894403	1.47407	0.694102	1.61749	1.17501	1.27107	0.832914	1.30927	0.955113	1.3285	0.794348	1.67675	0.861714	1.36211	0.913351
O14974	PPP1R12A	Protein phosphatase 1 regulatory subunit 12A	0.82596	0.648997	0.515229	0.53411	0.428639	0.452204	0.374073	0.483245	0.382255	0.496079	0.380542	0.493106	0.521647	0.412385	0.354066	0.669894	0.366942	0.488324	0.371678	0.714099	0.610702	1.11299	0.565055	0.858516	0.680025	1.00272	0.660508	0.746453	0.511994	0.719291	0.60698	0.415802	0.596832	0.887929	0.484454	0.706746	0.520308	0.69224	0.579753	0.967858	0.549007	0.625365	0.360414	0.929299	0.528894	0.602842	0.373035
O14975	SLC27A2	Very long-chain acyl-CoA synthetase	0.577659	0.632921	0.305225	1.6662	0.451497	0.536326	0.380052	0.542534	0.583987	0.844854	NA	NA	NA	NA	NA	NA	NA	NA	NA	NA	NA	NA	NA	NA	NA	NA	NA	NA	NA	NA	0.54641	0.868782	0.614829	0.688155	0.533232	0.955301	0.796925	1.26015	0.554226	1.59391	0.406271	0.591628	0.37159	2.17415	0.396226	0.493242	0.418222
O14976	GAK	Cyclin-G-associated kinase	0.596012	0.890729	0.474677	0.884749	0.559409	0.901225	0.567122	0.809708	0.632635	1.05159	0.529178	0.743259	0.443221	0.926093	0.439862	1.17616	0.683152	1.10557	0.525676	0.83197	0.686296	1.07998	0.596459	0.823373	0.625204	0.971782	0.497942	0.921812	0.630389	0.792742	0.57995	0.812447	0.616181	1.07013	0.453464	0.965149	0.799858	1.00555	0.462333	1.35427	0.572126	0.901947	0.519164	1.51961	0.551978	0.977282	0.639118
O14978	ZNF263	Zinc finger protein 263	0.322836	0.849946	0.384646	0.526982	0.316697	0.578435	0.39691	0.248153	0.225639	0.933429	NA	NA	NA	NA	NA	NA	NA	NA	NA	NA	0.286952	0.485054	0.432544	0.496758	0.769984	0.525272	0.402036	0.396374	0.485494	0.485934	NA	NA	NA	NA	NA	NA	NA	NA	NA	NA	NA	NA	NA	NA	NA	NA	NA
O14979	HNRNPDL	Heterogeneous nuclear ribonucleoprotein D-like	0.366753	0.77676	0.304639	0.486236	0.544395	0.230999	0.290254	0.381232	0.264487	0.640608	0.178972	0.569436	0.269759	0.469178	0.219613	0.628563	0.224419	0.754498	0.291965	0.62361	0.441166	0.64347	0.375663	0.668254	0.512455	0.703367	0.254502	0.537961	0.284701	0.564445	0.353798	0.673845	0.357727	0.706328	0.314589	0.562075	0.501115	1.11279	0.321735	1.03683	0.392577	0.594418	0.263043	0.617195	0.330849	0.712468	0.311387
O14980	XPO1	Exportin-1	0.46348	0.689225	0.27132	0.787322	0.485259	0.56121	0.396882	0.562999	0.402384	0.760798	0.483678	0.751535	0.357339	0.542134	0.334737	0.730833	0.436034	0.768203	0.472583	0.764505	0.416816	0.697887	0.32958	0.717137	0.496801	0.704967	0.327049	0.603571	0.438284	0.661804	0.405677	0.501653	0.317334	0.714984	0.294167	0.5791	0.384798	0.654133	0.340813	0.811105	0.35716	0.472314	0.273332	0.735283	0.319279	0.523039	0.348832
O14981	BTAF1	TATA-binding protein-associated factor 172	0.478377	1.05924	0.41834	1.01677	0.524005	0.752784	0.483625	0.579607	0.571163	0.909131	0.436251	0.849173	0.348691	0.69428	0.362233	0.87326	0.451482	0.907236	0.492143	0.525465	0.375491	0.716585	0.408051	0.533563	0.419224	0.615456	0.273277	0.613193	0.400102	0.747079	0.463406	0.946459	0.443485	0.86767	0.417689	0.678725	0.53453	1.03421	0.37662	0.842813	0.330695	0.53015	0.373713	1.06848	0.290187	0.891385	0.373756
O14986	PIP5K1B	Phosphatidylinositol 4-phosphate 5-kinase type-1 beta	0.609784	0.756324	0.310454	0.5334	0.47927	0.525011	0.433005	0.735892	0.485924	0.628865	0.309393	0.496172	0.31502	0.535966	0.27477	0.521623	0.336305	0.605649	0.396434	0.456434	0.518654	0.52874	0.560964	0.630951	0.563985	0.527798	0.529276	0.570482	0.53868	0.553753	0.439193	0.469979	0.387657	0.571201	0.477438	0.485341	0.417747	0.572638	0.446561	0.681015	0.501656	0.49006	0.453059	0.57759	0.561618	0.543076	0.432334
O15013	ARHGEF10	Rho guanine nucleotide exchange factor 10	0.335727	0.981814	0.327664	0.421005	0.249981	0.227902	0.240909	0.250758	0.228682	0.29709	0.628328	0.526744	0.495952	0.329171	0.518499	0.37899	0.535822	0.403224	0.448819	0.464252	0.251444	0.219309	0.374388	0.327185	0.375287	0.344911	0.296888	0.44897	0.328903	0.445493	0.418996	0.383132	0.355742	0.609412	0.368649	0.428224	0.395054	0.383527	0.384939	0.406811	0.267721	0.244617	0.187291	0.272782	0.227504	0.289006	0.303299
O15014	ZNF609	Zinc finger protein 609	0.486355	1.05736	0.348397	0.687305	0.653073	0.565129	0.435921	0.749356	0.481231	0.689004	NA	NA	NA	NA	NA	NA	NA	NA	NA	NA	NA	NA	NA	NA	NA	NA	NA	NA	NA	NA	NA	NA	NA	NA	NA	NA	NA	NA	NA	NA	NA	NA	NA	NA	NA	NA	NA
O15020	SPTBN2	Spectrin beta chain, non-erythrocytic 2	0.592946	2.03751	0.575053	1.03216	0.578689	1.1092	0.644762	1.00074	0.896922	0.945216	0.509675	0.774266	0.347958	0.526685	0.501546	0.658763	0.575218	0.767526	0.548216	1.09584	1.03168	1.86268	0.767235	2.09346	0.527488	0.976357	0.511384	1.12633	0.661654	1.52117	0.813795	1.43841	0.76295	1.72023	0.76016	2.4506	0.847712	2.23848	0.611117	1.18233	0.681651	1.49498	0.720895	2.12869	0.714968	1.5086	0.875664
O15021	MAST4	Microtubule-associated serine/threonine-protein kinase 4	1.31042	2.3834	0.80978	2.57064	1.13792	1.59581	0.774132	1.84646	1.37357	1.51418	NA	NA	NA	NA	NA	NA	NA	NA	NA	NA	NA	NA	NA	NA	NA	NA	NA	NA	NA	NA	NA	NA	NA	NA	NA	NA	NA	NA	NA	NA	NA	NA	NA	NA	NA	NA	NA
O15027	SEC16A	Protein transport protein Sec16A	0.41262	0.936576	0.31405	0.857419	0.392586	0.539194	0.442675	0.619571	0.429278	0.785982	0.366182	0.594699	0.276878	0.699372	0.309732	0.834902	0.366526	0.84127	0.418948	0.525463	0.460141	0.585605	0.412916	0.550591	0.436811	0.681078	0.311327	0.567021	0.342629	0.532443	0.462697	0.417533	0.376173	0.592194	0.28256	0.520674	0.439497	0.562988	0.370791	1.16815	0.376495	0.485311	0.36567	0.602243	0.355279	0.485055	0.399206
O15031	PLXNB2	Plexin-B2	1.21708	2.00686	0.824722	1.70047	1.13549	1.42734	1.17244	1.73148	1.24154	1.66433	0.900608	1.33814	0.74002	1.17436	0.749144	1.50248	0.932766	1.82248	1.18912	1.92408	1.12804	1.54841	1.06458	1.98518	1.1601	1.27546	0.929913	1.38272	1.00065	1.26913	1.08648	1.20538	0.795359	1.49807	0.743936	1.21719	0.996238	1.57168	0.805323	1.16636	0.98362	1.39908	0.816122	1.51195	0.889576	1.71453	0.973114
O15037	KHNYN	Protein KHNYN	NA	NA	NA	NA	NA	NA	NA	NA	NA	NA	NA	NA	NA	NA	NA	NA	NA	NA	NA	NA	NA	NA	NA	NA	NA	NA	NA	NA	NA	NA	NA	NA	NA	NA	NA	NA	NA	NA	NA	NA	NA	NA	NA	NA	NA	NA	NA
O15040	TECPR2	Tectonin beta-propeller repeat-containing protein 2	0.59618	1.04727	0.449121	0.874905	0.841436	0.611165	0.650038	0.752349	0.601973	1.07079	1.06522	1.01229	0.676914	0.969967	0.828749	1.19673	0.698352	1.15593	0.88922	1.37077	NA	NA	NA	NA	NA	NA	NA	NA	NA	NA	NA	NA	NA	NA	NA	NA	NA	NA	NA	NA	0.62215	0.925014	0.684079	1.17418	0.664561	1.11661	0.731109
O15042	U2SURP	U2 snRNP-associated SURP motif-containing protein	0.321888	0.789405	0.296831	0.710818	0.266034	0.406292	0.239546	0.475259	0.305127	0.642605	0.285716	0.61372	0.259606	0.459692	0.280054	0.674402	0.303921	0.586745	0.331342	0.586204	0.347536	0.711297	0.381434	0.842677	0.427283	0.762498	0.267634	0.651617	0.323048	0.614924	0.236795	0.385515	0.234924	0.886093	0.180768	0.452734	0.28973	0.618796	0.218331	0.677653	0.226609	0.546426	0.180127	0.641734	0.270538	0.44496	0.225963
O15047	SETD1A	Histone-lysine N-methyltransferase SETD1A	0.592849	1.0676	0.44684	0.9019	0.625501	0.756349	0.474146	0.817978	0.584161	1.23253	0.247821	0.846841	0.32589	0.886309	0.301176	0.750829	0.36002	1.13137	0.485826	0.950128	0.333468	0.748679	0.425276	0.6997	0.610675	0.687779	0.235117	0.627376	0.393646	0.637676	0.380378	0.552103	0.337913	1.19004	0.231028	0.749829	0.437322	1.01984	0.432106	0.912004	0.514304	0.591578	0.362618	0.87722	0.545923	0.715938	0.628293
O15050	TRANK1	TPR and ankyrin repeat-containing protein 1	0.556334	3.00045	0.76527	2.70274	0.766776	2.26842	0.771908	1.5938	0.917499	1.9035	NA	NA	NA	NA	NA	NA	NA	NA	NA	NA	NA	NA	NA	NA	NA	NA	NA	NA	NA	NA	NA	NA	NA	NA	NA	NA	NA	NA	NA	NA	0.687369	2.18671	1.02459	4.05369	0.745076	1.78601	1.17901
O15056	SYNJ2	Synaptojanin-2	NA	NA	NA	NA	NA	NA	NA	NA	NA	NA	NA	NA	NA	NA	NA	NA	NA	NA	NA	NA	0.480368	0.925803	0.532724	1.00415	0.484208	0.635517	0.381127	0.70497	0.654852	0.828822	0.476899	1.12083	0.412571	0.683289	0.39356	0.715945	0.594018	0.821091	0.405992	1.33712	0.420365	0.677135	0.387452	0.667009	0.446277	0.862244	0.528618
O15061	SYNM	Synemin	1.52107	0.561619	2.5366	0.482306	1.21252	0.592847	0.559566	0.571668	0.55627	0.52415	2.53949	0.475696	1.9826	0.567403	2.76768	0.556714	0.585352	0.628838	0.606553	0.468229	0.498027	0.557244	0.624736	0.655895	1.88311	0.977961	1.95394	0.613781	1.23788	0.580861	0.735064	0.621816	0.573927	0.676533	5.84842	0.74868	0.844059	0.675507	0.686547	0.753268	1.20827	0.481994	0.589455	0.465107	3.70059	0.534759	0.599801
O15066	KIF3B	Kinesin-like protein KIF3B	0.597537	0.970799	0.423378	0.816464	0.486039	0.726783	0.431014	0.821393	0.476599	0.674547	0.811609	0.713271	0.614489	0.907679	1.00212	0.988164	0.850323	0.948464	0.865365	1.0218	0.3603	0.617797	0.451634	0.51054	0.402215	0.565785	0.351149	0.50148	0.47915	0.617797	0.448632	0.71491	0.44183	0.807963	0.369989	0.767426	0.522254	0.938608	0.375365	1.27595	0.399542	0.591899	0.406331	0.856041	0.372719	0.7191	0.419399
O15067	PFAS	Phosphoribosylformylglycinamidine synthase	0.360276	0.385476	0.247925	0.408543	0.283732	0.280654	0.292094	0.364615	0.298733	0.422893	0.293995	0.252092	0.250886	0.327041	0.247534	0.356926	0.276889	0.405017	0.289817	0.339172	0.329519	0.448933	0.309611	0.36273	0.276551	0.362463	0.239502	0.367952	0.30946	0.349416	0.337107	0.263548	0.307239	0.331353	0.21886	0.376997	0.385564	0.399045	0.234988	0.455312	0.3435	0.36641	0.314288	0.41432	0.287651	0.422457	0.324182
O15068	MCF2L	Guanine nucleotide exchange factor DBS	NA	NA	NA	NA	NA	NA	NA	NA	NA	NA	NA	NA	NA	NA	NA	NA	NA	NA	NA	NA	NA	NA	NA	NA	NA	NA	NA	NA	NA	NA	NA	NA	NA	NA	NA	NA	NA	NA	NA	NA	NA	NA	NA	NA	NA	NA	NA
O15075	DCLK1	Serine/threonine-protein kinase DCLK1	3.68691	0.899747	1.1789	0.818277	1.19249	1.20254	1.01812	0.954391	1.45184	1.11582	2.60704	1.12494	1.22863	1.21091	1.77255	1.07321	1.34655	0.916615	1.77218	1.42339	1.54987	0.817022	1.53195	0.949169	1.39818	1.17763	1.44366	1.19262	1.47253	0.812356	2.54208	1.00343	2.24879	1.32764	1.32365	1.73627	1.75502	1.37882	2.79224	1.08049	2.20163	1.01165	1.35356	0.983273	1.30812	0.907644	1.45435
O15078	CEP290	Centrosomal protein of 290 kDa	2.15047	3.0221	0.815872	2.00972	0.90569	1.57589	2.13863	3.32945	1.89591	3.73198	NA	NA	NA	NA	NA	NA	NA	NA	NA	NA	NA	NA	NA	NA	NA	NA	NA	NA	NA	NA	3.11578	2.51309	1.13927	2.26676	0.808646	3.32425	2.32745	3.23023	1.68603	3.51216	2.36648	3.84301	1.64322	5.25946	1.8601	2.76411	2.21459
O15083	ERC2	ERC protein 2	NA	NA	NA	NA	NA	NA	NA	NA	NA	NA	NA	NA	NA	NA	NA	NA	NA	NA	NA	NA	NA	NA	NA	NA	NA	NA	NA	NA	NA	NA	NA	NA	NA	NA	NA	NA	NA	NA	NA	NA	NA	NA	NA	NA	NA	NA	NA
O15084	ANKRD28	Serine/threonine-protein phosphatase 6 regulatory ankyrin repeat subunit A	0.481794	1.00229	0.438366	0.984163	0.529292	0.702505	0.541563	0.60156	0.566057	1.1196	0.479935	0.614873	0.463715	0.627999	0.370981	0.800602	0.548031	0.875847	0.529513	0.835716	0.465801	0.933431	0.44608	0.940655	0.431693	0.732136	0.323882	0.669164	0.417426	0.600438	0.550468	0.546475	0.413145	0.493355	0.340718	0.434304	0.426425	1.02266	0.31625	1.26232	0.378222	0.514789	0.411634	0.88684	0.43986	0.820857	0.460929
O15085	ARHGEF11	Rho guanine nucleotide exchange factor 11	0.920371	0.933115	0.596624	1.07088	0.876705	0.836624	0.768972	1.16832	0.700333	0.798234	0.774073	0.940739	0.762679	0.93136	0.765736	0.924413	0.802487	0.997082	0.760456	0.997707	0.694467	1.08992	0.716081	1.11039	0.895088	1.06675	0.588056	0.950155	0.828594	0.870631	0.835819	0.844905	0.810798	1.19338	0.642403	0.910255	0.990979	1.2614	0.748905	1.68718	NA	NA	NA	NA	NA	NA	NA
O15091	PRORP	Mitochondrial ribonuclease P catalytic subunit	0.405589	1.38873	0.320367	1.13536	0.450542	0.463134	0.50455	1.13835	0.570851	1.55761	0.319381	0.830913	0.264992	0.645175	0.200624	0.926218	0.59627	0.927465	0.415062	0.849082	NA	NA	NA	NA	NA	NA	NA	NA	NA	NA	0.453025	0.800529	0.40843	0.934876	0.35676	0.717686	0.494512	1.01931	0.319263	0.987074	0.291081	0.532727	0.265588	0.754231	0.376165	0.588446	0.430799
O15111	CHUK	Inhibitor of nuclear factor kappa-B kinase subunit alpha	0.636495	0.868021	0.314724	0.762157	0.601899	0.799975	0.509306	0.713868	0.459024	0.801755	0.622167	0.877687	0.500087	0.794853	0.431288	0.902918	0.545827	0.87476	0.674712	0.68453	0.320912	0.792196	0.309992	0.499196	0.409916	0.684167	0.27916	0.551464	0.407229	0.741112	0.508516	0.88392	0.547771	0.787755	0.46386	0.805663	0.676959	1.05908	0.493538	0.809125	0.515454	0.650483	0.347349	0.969248	0.383178	0.949005	0.399077
O15116	LSM1	U6 snRNA-associated Sm-like protein LSm1	0.620165	0.599048	0.419834	0.8738	0.446228	0.704607	0.41705	0.638264	0.48742	0.93456	0.488249	0.543069	0.435396	0.500713	0.280271	0.872504	0.353908	0.917827	0.438106	0.705362	NA	NA	NA	NA	NA	NA	NA	NA	NA	NA	0.448491	1.01004	0.516358	0.93892	0.344727	0.709094	0.445458	0.817282	0.395963	1.06327	NA	NA	NA	NA	NA	NA	NA
O15117	FYB1	FYN-binding protein 1	2.69486	3.30255	2.09082	6.26209	3.39514	8.85291	4.98585	7.87037	5.01303	8.36223	1.31214	3.05239	1.54329	9.2467	1.47936	3.87851	1.59497	3.29014	2.37543	1.49842	1.22054	1.64041	1.52185	1.76527	1.45299	2.37835	1.04921	3.87782	0.87548	2.0496	2.48587	4.07763	2.52221	2.49049	1.38382	4.90754	6.47944	7.13197	1.54079	2.12373	1.44131	3.67359	1.25022	4.73022	1.29391	2.20886	1.35303
O15118	NPC1	NPC intracellular cholesterol transporter 1	0.510268	1.20707	0.385785	1.53289	0.500093	1.17256	0.593008	1.56476	0.57892	1.15579	0.752119	1.19861	0.606643	1.02786	0.700925	1.2875	0.673053	1.04648	0.708323	0.947559	0.53409	0.943275	0.56579	1.1357	0.608106	1.03732	0.442199	0.999708	0.497428	1.15	0.637955	1.0652	0.534767	1.1863	0.37828	0.737702	0.616534	1.13242	0.554757	0.99499	0.590143	0.75819	0.503198	1.21551	0.479595	1.19171	0.61287
O15120	AGPAT2	1-acyl-sn-glycerol-3-phosphate acyltransferase beta	0.948667	1.53867	0.526551	1.36825	0.662228	1.06455	0.567571	1.36501	0.880278	1.4365	NA	NA	NA	NA	NA	NA	NA	NA	NA	NA	NA	NA	NA	NA	NA	NA	NA	NA	NA	NA	0.987918	1.95648	0.95605	1.45621	0.849138	1.33589	0.891424	1.43492	0.818957	1.64174	0.536727	1.22988	0.585639	1.27527	0.641197	1.33278	0.680987
O15121	DEGS1	Sphingolipid delta(4)-desaturase DES1	NA	NA	NA	NA	NA	NA	NA	NA	NA	NA	NA	NA	NA	NA	NA	NA	NA	NA	NA	NA	NA	NA	NA	NA	NA	NA	NA	NA	NA	NA	NA	NA	NA	NA	NA	NA	NA	NA	NA	NA	NA	NA	NA	NA	NA	NA	NA
O15126	SCAMP1	Secretory carrier-associated membrane protein 1	0.306507	0.665446	0.22245	0.558708	0.212857	0.442425	0.182884	0.453278	0.254184	0.281729	0.379989	0.585885	0.287078	0.427058	0.361069	0.623881	0.384263	0.544824	0.428669	0.657418	0.440737	0.504026	0.409834	0.613091	0.409532	0.668	0.278474	0.449192	0.292289	0.496678	0.422632	0.293293	0.414252	0.488163	0.192427	0.520177	0.355942	0.558555	0.278416	0.749575	0.337345	0.53429	0.306438	0.633129	0.259718	0.475999	0.267483
O15127	SCAMP2	Secretory carrier-associated membrane protein 2	1.21417	2.94886	1.21679	3.59	0.343541	0.950135	0.844216	4.81489	1.3981	2.36637	0.593747	2.44864	0.856039	2.67615	1.45008	2.69634	1.48736	3.1005	1.23093	1.22382	1.43988	1.85768	1.20852	4.59101	0.872082	1.94969	0.766882	2.86049	0.588725	2.12524	1.4663	3.07052	2.02437	2.60928	0.625119	1.91392	1.92551	3.61255	0.87676	2.36607	0.843578	1.48127	0.927722	2.23604	0.838247	1.47227	1.07278
O15131	KPNA5	Importin subunit alpha-6	NA	NA	NA	NA	NA	NA	NA	NA	NA	NA	NA	NA	NA	NA	NA	NA	NA	NA	NA	NA	NA	NA	NA	NA	NA	NA	NA	NA	NA	NA	NA	NA	NA	NA	NA	NA	NA	NA	NA	NA	14.3734	2.98891	6.54038	1.52184	4.86003	1.81804	8.79085
O15143	ARPC1B	Actin-related protein 2/3 complex subunit 1B	0.852367	1.61374	0.527702	1.5217	0.665933	1.47021	0.781069	1.77346	0.751334	1.63392	0.541157	1.01747	0.492019	1.39112	0.41468	1.48483	0.506001	1.45387	0.65582	1.08194	1.01353	2.03952	1.11115	1.81369	0.703472	1.36581	0.756757	2.27904	0.933336	1.83276	1.02019	1.54565	1.07175	1.75881	0.786205	1.50954	1.22389	1.62887	0.756906	1.38641	0.771522	1.6512	0.822693	2.15531	0.751066	2.00328	0.83598
O15144	ARPC2	Actin-related protein 2/3 complex subunit 2	1.3495	1.53241	0.694492	1.48376	0.765408	1.11103	0.950033	1.83427	1.21218	1.7433	0.86321	1.639	0.823895	2.50423	0.888954	1.69075	1.19573	1.5848	1.07121	1.53951	1.01617	1.70477	1.06835	1.75483	0.824112	1.26815	0.877119	1.95572	1.19228	1.52304	0.987801	1.55724	0.827523	1.26283	0.626554	1.16652	1.10324	1.38321	0.718024	1.35746	0.687421	0.969043	0.682501	1.2912	0.61171	1.23885	0.645521
O15145	ARPC3	Actin-related protein 2/3 complex subunit 3	1.13895	1.31075	0.508587	1.44029	0.570056	1.1992	0.856005	1.7985	0.78952	1.7484	0.836318	1.40191	0.599932	1.90776	0.704163	1.57616	0.890592	1.15512	0.73852	1.49696	0.847514	1.77615	0.79888	1.52081	0.68602	1.14882	1.02702	1.7372	1.01323	1.85283	0.82648	1.88033	0.829858	1.59238	0.727303	0.949841	1.15683	1.20988	0.647143	1.88154	0.738431	0.992221	0.559427	1.13784	0.578991	1.10092	0.619163
O15155	BET1	BET1 homolog	0.927959	0.985879	0.804245	1.15145	1.11256	0.928207	0.952511	0.774881	0.955939	0.97909	NA	NA	NA	NA	NA	NA	NA	NA	NA	NA	NA	NA	NA	NA	NA	NA	NA	NA	NA	NA	1.30914	0.748208	0.796074	0.813822	1.1391	1.40431	1.28025	0.80167	1.99878	1.91506	0.43212	0.689998	0.433624	0.907213	0.376208	0.742994	0.43613
O15156	ZBTB7B	Zinc finger and BTB domain-containing protein 7B	NA	NA	NA	NA	NA	NA	NA	NA	NA	NA	0.880804	1.01974	0.635865	1.1618	0.911824	1.37894	1.08616	1.8025	0.927183	1.32314	NA	NA	NA	NA	NA	NA	NA	NA	NA	NA	0.705337	2.12376	0.894963	2.89466	0.462111	1.28186	0.631255	2.6011	0.540515	3.50091	NA	NA	NA	NA	NA	NA	NA
O15160	POLR1C	DNA-directed RNA polymerases I and III subunit RPAC1	0.239348	0.523424	0.160539	0.851124	0.303032	0.441261	0.251141	0.41233	0.253673	0.75455	0.209843	0.425345	0.18138	0.423755	0.179961	0.525882	0.22952	0.521454	0.246872	0.586143	0.409033	0.633359	0.412093	0.791802	0.402021	0.539236	0.33378	0.53726	0.414101	0.669312	0.293194	0.596729	0.288414	0.565645	0.283518	0.424072	0.362374	0.574518	0.223093	0.498913	0.467929	0.486317	0.304331	0.640702	0.328026	0.609372	0.352491
O15162	PLSCR1	Phospholipid scramblase 1	1.9019	8.24263	1.4589	7.08211	2.47324	4.2349	2.8603	9.21051	2.46308	7.08798	2.13423	14.8242	2.26604	4.70788	1.97198	6.80692	2.25865	4.89318	2.00278	2.54285	1.36838	4.36989	1.87652	7.2193	1.88481	3.71233	1.73698	4.57986	1.48878	5.07497	2.09588	5.89795	1.82416	5.15478	1.29496	3.40796	2.51341	5.95508	1.11007	1.47676	1.41449	5.00877	1.46469	10.4916	1.14704	3.65053	1.43726
O15164	TRIM24	Transcription intermediary factor 1-alpha	NA	NA	NA	NA	NA	NA	NA	NA	NA	NA	NA	NA	NA	NA	NA	NA	NA	NA	NA	NA	NA	NA	NA	NA	NA	NA	NA	NA	NA	NA	NA	NA	NA	NA	NA	NA	NA	NA	NA	NA	0.345037	0.633034	0.35758	0.778092	0.39439	0.764549	0.364087
O15173	PGRMC2	Membrane-associated progesterone receptor component 2	0.808774	0.963873	0.50817	0.680758	0.739719	0.836007	0.829411	0.869885	0.755459	1.05556	0.58739	0.46294	0.335908	0.614862	0.406959	0.928399	0.524192	0.897202	0.472528	0.777049	0.897757	1.06079	0.735087	0.928552	0.915065	0.458156	0.695403	1.00451	0.785406	0.673968	0.909405	1.05211	0.754418	1.12134	0.646091	0.982994	0.951767	1.19898	0.70322	1.4813	0.774715	0.946129	0.762696	1.0001	0.70139	0.873769	0.749952
O15194	CTDSPL	CTD small phosphatase-like protein	NA	NA	NA	NA	NA	NA	NA	NA	NA	NA	NA	NA	NA	NA	NA	NA	NA	NA	NA	NA	NA	NA	NA	NA	NA	NA	NA	NA	NA	NA	NA	NA	NA	NA	NA	NA	NA	NA	NA	NA	NA	NA	NA	NA	NA	NA	NA
O15195	VILL	Villin-like protein	NA	NA	NA	NA	NA	NA	NA	NA	NA	NA	NA	NA	NA	NA	NA	NA	NA	NA	NA	NA	NA	NA	NA	NA	NA	NA	NA	NA	NA	NA	NA	NA	NA	NA	NA	NA	NA	NA	NA	NA	NA	NA	NA	NA	NA	NA	NA
O15211	RGL2	Ral guanine nucleotide dissociation stimulator-like 2	1.18052	0.891619	0.78028	1.12599	0.55078	0.876285	0.537338	0.929892	0.762874	0.989818	0.930676	1.14734	0.749244	0.928749	0.82963	1.05554	0.903733	1.01021	0.855744	1.46254	NA	NA	NA	NA	NA	NA	NA	NA	NA	NA	0.936209	1.04167	0.994734	1.09168	0.838867	1.36814	1.02762	1.24691	1.18601	1.51014	NA	NA	NA	NA	NA	NA	NA
O15212	PFDN6	Prefoldin subunit 6	1.20905	0.835184	0.497561	1.00917	0.763666	0.769763	0.603271	1.02426	0.788493	0.816477	NA	NA	NA	NA	NA	NA	NA	NA	NA	NA	NA	NA	NA	NA	NA	NA	NA	NA	NA	NA	NA	NA	NA	NA	NA	NA	NA	NA	NA	NA	NA	NA	NA	NA	NA	NA	NA
O15213	WDR46	WD repeat-containing protein 46	0.257196	0.561115	0.220056	0.446802	0.209258	0.264681	0.24795	0.344965	0.278325	0.379584	0.327623	0.430121	0.285652	0.385886	0.292913	0.46499	0.302704	0.539386	0.330274	0.514341	0.488111	0.580067	0.541589	0.568576	0.472534	0.566289	0.381844	0.633043	0.511552	0.622789	NA	NA	NA	NA	NA	NA	NA	NA	NA	NA	0.343294	0.331648	0.318737	0.455808	0.250107	0.579906	0.320839
O15226	NKRF	NF-kappa-B-repressing factor	0.267847	0.567352	0.210903	0.346695	0.229238	0.254977	0.22453	0.275019	0.259069	0.359234	0.521784	0.458468	0.361226	0.490923	0.467875	0.527144	0.41247	0.647768	0.402375	0.389811	0.210738	0.578629	0.28427	0.325483	0.213769	0.409705	0.184246	0.347523	0.251089	0.367681	0.563002	0.44429	0.31556	0.705337	0.245983	0.432718	0.432742	0.410506	0.279026	0.354892	0.359412	0.45993	0.347938	0.62988	0.343869	0.590149	0.401409
O15228	GNPAT	Dihydroxyacetone phosphate acyltransferase	0.478391	1.03026	0.321761	1.63316	0.526651	0.894111	0.483153	1.69583	0.514442	1.38975	0.482079	1.27059	0.37917	0.757321	0.34788	0.707983	0.491374	1.25048	0.522759	0.996244	0.623454	0.960878	0.648799	1.07328	0.824094	0.998307	0.58311	0.9266	0.551935	0.912023	0.563572	0.842189	0.531379	1.52613	0.478719	0.890478	0.559505	1.16649	0.444188	2.06781	0.522295	0.805829	0.435388	1.03938	0.438373	0.810238	0.542482
O15229	KMO	Kynurenine 3-monooxygenase	1.92797	1.82977	2.96076	1.55194	3.10705	2.33548	1.39901	1.40724	2.03974	1.26711	1.40266	1.2047	2.32603	0.737919	1.12607	1.33563	0.967729	1.13408	1.52511	0.462311	NA	NA	NA	NA	NA	NA	NA	NA	NA	NA	0.867623	1.05665	2.27299	1.53	1.3655	2.09545	0.758485	0.662072	1.84423	1.30021	0.986925	0.875269	1.86315	1.19276	1.23606	1.84785	1.51932
O15230	LAMA5	Laminin subunit alpha-5	4.02944	1.82934	2.15216	1.81787	4.70602	1.21597	1.53818	1.55355	1.326	1.75383	3.03536	1.41509	2.27525	1.41727	2.55108	1.63273	1.61059	2.185	2.19988	1.40493	1.35518	1.01754	1.98053	1.25676	2.72285	1.1953	2.00114	1.40149	4.54641	1.60198	1.90812	2.27702	1.25255	1.44552	2.64047	1.92939	1.68889	1.66363	4.06505	2.17884	1.97604	1.15275	1.57877	0.898919	1.35716	1.59031	1.3483
O15231	ZNF185	Zinc finger protein 185	0.893024	1.3438	2.19245	1.7447	0.96836	2.22982	1.16149	2.04924	2.8374	1.74838	1.29494	3.37687	1.17757	2.32509	1.90572	2.82003	2.17286	1.48955	1.3892	3.01632	2.79367	3.55068	1.25456	4.93829	1.11116	1.17541	1.18584	1.09824	0.917591	1.4744	1.52613	1.39608	1.51696	5.66115	2.0137	6.05258	1.31661	3.81966	1.8603	1.34424	1.02821	2.1254	1.36333	3.91343	2.08277	2.65492	2.36217
O15234	CASC3	Protein CASC3	0.4388	0.499554	0.30355	0.439279	0.478406	0.360525	0.3284	0.501503	0.325678	0.419351	0.265277	0.250712	0.160314	0.249143	0.131382	0.294691	0.185086	0.313438	0.161249	0.309176	NA	NA	NA	NA	NA	NA	NA	NA	NA	NA	0.149338	0.0732769	0.185823	0.584676	0.0484676	0.230408	0.089079	0.24992	0.203514	0.517421	0.0612991	0.247235	0.0621427	0.182753	0.0551887	0.0965544	0.0708175
O15235	MRPS12	28S ribosomal protein S12, mitochondrial	0.653845	0.988136	0.438186	0.986556	0.467796	0.499771	0.409917	0.768849	0.405515	0.799801	0.41841	0.498974	0.380725	0.944145	0.41159	0.632663	0.432034	0.658789	0.439001	0.456493	0.33817	0.543794	0.392592	0.751315	0.31137	0.461911	0.275371	0.409038	0.340454	0.562548	NA	NA	NA	NA	NA	NA	NA	NA	NA	NA	1.0358	0.955381	0.803973	0.989824	0.914135	1.17309	0.793183
O15243	LEPROT	Leptin receptor gene-related protein	NA	NA	NA	NA	NA	NA	NA	NA	NA	NA	0.660405	1.0041	0.431804	0.900195	0.65691	1.00658	0.716074	1.37607	0.510837	1.03757	0.548587	0.606007	0.661295	1.1307	0.448668	1.15537	0.316441	0.743743	0.526595	0.831164	NA	NA	NA	NA	NA	NA	NA	NA	NA	NA	NA	NA	NA	NA	NA	NA	NA
O15247	CLIC2	Chloride intracellular channel protein 2	3.04628	1.00716	2.09944	1.44212	1.78349	2.12912	1.71923	1.77384	1.76703	2.24929	1.84152	2.11706	1.73271	3.58795	1.90218	3.23372	1.69088	2.03831	2.26758	0.961692	3.02191	4.00784	2.91105	1.8346	3.96342	2.5894	2.89978	5.59276	2.98985	2.89664	2.79211	1.94433	1.71167	1.63656	1.38852	2.39233	2.28127	2.96757	2.3783	1.39164	2.67946	3.41843	1.72165	7.77262	2.23265	1.70869	2.55413
O15254	ACOX3	Peroxisomal acyl-coenzyme A oxidase 3	0.518255	0.88059	0.55031	0.708201	0.603919	1.04634	0.664489	1.14637	0.919723	1.04673	0.589008	0.720999	0.390436	1.38138	0.483538	1.04495	0.926427	1.38896	0.873216	0.925694	0.649293	1.03074	0.813675	1.39696	0.486184	0.585477	0.500848	0.872403	0.51523	0.860813	0.404153	0.725446	0.569356	0.81258	0.433243	0.890625	0.642084	1.17124	0.354512	2.83028	0.335089	0.681774	0.465229	2.1169	0.495571	0.882486	0.611701
O15258	RER1	Protein RER1	0.522732	1.48091	0.571496	1.746	0.557703	1.23867	0.65545	1.27803	0.778521	1.68844	0.495032	1.18579	0.382684	1.23786	0.514105	1.6141	0.579692	1.61622	0.639642	1.03401	0.709307	1.08249	0.554807	1.55085	0.618704	1.02995	0.423959	0.959093	0.557712	1.11364	0.596088	1.81994	0.653484	1.55966	0.655838	1.03514	0.743537	1.21953	0.406514	1.85315	0.476454	1.09204	0.581405	1.43286	0.456203	1.49338	0.664474
O15260	SURF4	Surfeit locus protein 4	0.601004	1.20275	0.436844	1.31703	0.594265	0.858359	0.553799	1.17619	0.664438	1.26219	0.622715	0.747679	0.499169	0.936687	0.487009	1.17056	0.581371	1.00973	0.702525	0.891978	0.790036	0.774839	0.717763	1.24933	0.599669	1.04165	0.519951	1.04628	0.594984	1.04811	0.561874	0.841907	0.540243	0.880572	0.382395	0.683293	0.65915	0.744447	0.561108	1.14418	0.55904	0.862066	0.458208	0.804531	0.389048	0.880894	0.49167
O15264	MAPK13	Mitogen-activated protein kinase 13	0.932645	1.98026	1.10624	3.08188	0.916268	3.08247	0.964643	2.69388	1.41875	5.38078	0.86041	1.68104	0.912306	1.08098	1.07197	1.93804	1.0192	2.1169	0.744562	2.66843	1.75171	3.82411	1.26952	3.94734	1.22382	2.55073	1.24133	2.30197	2.15744	3.21436	1.05572	2.66768	1.11051	2.58914	1.0282	1.83122	1.31871	4.41928	0.907163	3.08299	0.974585	1.65552	0.884917	2.2167	1.18785	2.28393	1.31924
O15269	SPTLC1	Serine palmitoyltransferase 1	0.679672	1.22425	0.609952	1.12922	0.820011	1.01863	0.796506	0.938857	0.796877	1.58322	0.837846	1.19298	0.557541	0.896814	0.61387	0.720028	0.873632	1.7552	0.697179	1.03116	0.802861	1.00344	0.759464	1.49088	0.842363	0.894522	0.576516	0.954319	0.681731	1.09533	0.632689	1.16947	0.660752	1.16339	0.526179	0.697169	0.740325	1.26588	0.577669	1.30236	0.621709	1.07582	0.732746	1.22563	0.587424	0.834934	0.834223
O15270	SPTLC2	Serine palmitoyltransferase 2	0.470631	1.49278	0.402148	1.31418	0.412608	0.890513	0.576059	0.963907	0.628797	1.27138	0.554732	0.956018	0.379037	0.8725	0.494056	0.811542	0.713359	1.02755	0.51011	0.865416	0.75287	1.45277	0.957769	1.86497	0.714865	1.17395	0.590914	1.34518	0.583262	1.52227	0.618753	1.11756	0.645243	1.06368	0.528276	0.953057	0.799894	1.47919	0.421415	1.16913	0.538935	0.789202	0.722984	0.968778	0.609748	1.05645	0.641503
O15294	OGT	UDP-N-acetylglucosamine--peptide N-acetylglucosaminyltransferase 110 kDa subunit	0.496422	1.06176	0.342074	0.864935	0.562141	0.748355	0.516727	0.561105	0.659053	1.02381	0.359919	0.82725	0.307876	0.679576	0.319276	0.86375	0.449192	0.975248	0.534504	0.691	0.442726	0.806192	0.446144	0.705969	0.504528	0.693239	0.302489	0.646389	0.461295	0.686574	0.326215	0.361864	0.24807	0.463004	0.254304	0.342736	0.335376	0.529875	0.220195	0.509114	0.381896	0.494328	0.328231	0.662989	0.364258	0.659803	0.385807
O15296	ALOX15B	Arachidonate 15-lipoxygenase B	NA	NA	NA	NA	NA	NA	NA	NA	NA	NA	2.03768	1.21219	1.83108	3.80156	2.1731	1.45074	3.93778	1.18672	2.62814	4.26934	NA	NA	NA	NA	NA	NA	NA	NA	NA	NA	1.37616	1.55048	2.05574	8.58423	1.8749	3.53232	1.90249	1.68347	1.00734	1.49914	NA	NA	NA	NA	NA	NA	NA
O15305	PMM2	Phosphomannomutase 2	0.312081	0.582211	0.279464	0.663933	0.206783	0.407458	0.249418	0.733125	0.307643	0.679689	0.314797	0.657578	0.271982	0.753248	0.310191	1.07725	0.403688	0.760015	0.375729	0.676583	0.577782	0.714896	0.51755	0.999841	0.40702	0.713955	0.445261	0.70351	0.463664	0.938827	0.380403	0.765562	0.431795	0.567418	0.28412	0.58719	0.430712	0.7766	0.31217	1.38474	0.316467	0.629268	0.364114	0.83378	0.366743	0.834454	0.537424
O15321	TM9SF1	Transmembrane 9 superfamily member 1	1.07136	1.87603	0.521496	1.8481	1.04442	1.2701	0.809241	1.89546	1.11462	2.29661	0.739356	1.32869	0.519652	1.203	0.696253	1.15851	0.767517	1.31334	0.832631	1.24842	1.05178	1.3195	0.791733	2.15019	0.547806	1.20969	0.359831	1.58929	0.456838	1.73063	1.32142	1.9012	1.12353	1.52937	0.758887	1.32939	1.4396	1.77969	1.03382	2.65747	0.860936	1.1263	0.780842	1.5154	0.813701	1.2793	0.804093
O15327	INPP4B	Inositol polyphosphate 4-phosphatase type II	2.21724	2.50676	2.21538	0.974282	1.26279	1.39928	1.98739	1.63761	2.67656	1.75575	2.0008	1.20971	1.40395	1.61745	1.31998	1.30867	1.44548	2.27546	1.55501	3.82154	1.53928	2.45957	1.66773	1.77488	1.23618	1.15622	1.70042	1.74564	1.37495	1.23421	2.41217	0.894691	2.26242	1.56091	2.31883	3.16525	1.59377	2.86702	0.977945	1.97425	1.36615	1.19898	1.4328	3.70216	1.68884	1.19073	2.01146
O15344	MID1	E3 ubiquitin-protein ligase Midline-1	0.966893	1.02274	0.670138	0.713006	0.914969	0.699925	0.867472	0.745006	0.853786	1.13318	0.841584	0.872901	0.724602	0.805128	0.625969	1.60601	0.818688	1.30128	0.836445	1.6172	0.655254	0.810853	0.602682	0.831115	1.03116	0.851745	0.711482	0.760911	1.04467	0.816916	0.58341	0.726048	0.466229	0.521537	0.518997	0.752806	0.685484	0.707775	0.414324	0.459525	0.623817	0.922928	0.577025	0.734623	0.644398	1.31752	0.598647
O15347	HMGB3	High mobility group protein B3	0.146989	0.487693	0.119186	0.929212	0.126721	0.200062	0.126742	0.292655	0.113363	0.908319	0.112275	0.376679	0.0972342	0.230271	0.0929376	0.346558	0.0941176	0.57677	0.105287	0.2677	NA	NA	NA	NA	NA	NA	NA	NA	NA	NA	0.0761995	0.204726	0.0950777	0.173574	0.0480267	0.154258	0.0672221	0.194066	0.0742723	0.285349	0.123255	0.199501	0.111287	0.369217	0.114438	0.234969	0.124738
O15350	TP73	Tumor protein p73	NA	NA	NA	NA	NA	NA	NA	NA	NA	NA	NA	NA	NA	NA	NA	NA	NA	NA	NA	NA	NA	NA	NA	NA	NA	NA	NA	NA	NA	NA	NA	NA	NA	NA	NA	NA	NA	NA	NA	NA	NA	NA	NA	NA	NA	NA	NA
O15355	PPM1G	Protein phosphatase 1G	0.269212	0.45859	0.231488	0.566243	0.256015	0.358789	0.282608	0.385529	0.262147	0.522881	0.246281	0.387437	0.217136	0.366026	0.204589	0.504466	0.275213	0.368254	0.241263	0.401461	0.281117	0.421962	0.268842	0.432615	0.268459	0.482773	0.206874	0.44028	0.241312	0.419258	0.414314	0.320991	0.27799	0.535301	0.220241	0.452745	0.349726	0.606057	0.319144	0.678566	0.47152	0.503666	0.2856	0.769889	0.314168	0.57246	0.386191
O15357	INPPL1	Phosphatidylinositol 3,4,5-trisphosphate 5-phosphatase 2	0.415914	0.985328	0.253183	0.666828	0.466648	0.509605	0.363506	0.63515	0.375578	0.683152	0.606718	0.570148	0.452717	0.552067	0.444713	0.513115	0.668563	0.576011	0.576384	0.454265	0.568244	0.573155	0.549297	0.561341	0.541918	0.675065	0.429262	0.755354	0.497673	0.711559	0.419492	0.69347	0.424518	0.593318	0.326708	0.559301	0.509413	0.7219	0.326794	1.11761	0.367812	0.414405	0.332049	0.615588	0.344024	0.496487	0.388941
O15371	EIF3D	Eukaryotic translation initiation factor 3 subunit D	0.461091	0.846113	0.299031	0.93477	0.46331	0.602278	0.474119	0.785228	0.50239	1.07615	0.418063	0.647969	0.344396	0.593437	0.279141	0.723333	0.470698	0.624375	0.417078	0.579115	0.373413	0.564937	0.355691	0.51813	0.357165	0.480988	0.285868	0.516729	0.32259	0.614268	0.479973	0.750422	0.390554	0.865499	0.332804	0.631874	0.575626	0.960744	0.361448	0.957773	0.63604	0.717684	0.58301	1.04801	0.612427	0.951049	0.598535
O15372	EIF3H	Eukaryotic translation initiation factor 3 subunit H	0.627874	1.07294	0.455386	1.18767	0.646779	0.804753	0.582791	1.18693	0.650198	1.22431	0.892494	0.976874	0.741314	0.906058	0.701018	1.01731	0.844509	0.996916	0.772158	0.805073	0.623308	0.794279	0.658534	0.788865	0.542761	0.985734	0.471797	0.84805	0.565074	1.04989	0.638493	0.848288	0.587318	0.967851	0.515457	0.702211	0.818263	1.25819	0.463548	0.912161	0.495213	0.715863	0.540112	0.854787	0.48522	0.77044	0.518379
O15379	HDAC3	Histone deacetylase 3	0.88481	1.04863	0.543491	0.944426	0.77505	0.843438	0.71038	0.910271	0.753787	1.10472	NA	NA	NA	NA	NA	NA	NA	NA	NA	NA	0.451522	0.903721	0.484749	0.764966	0.755157	0.723234	0.314105	0.612653	0.404489	0.528776	0.562042	0.840821	0.421609	1.01298	0.543395	0.970661	0.630989	0.89287	0.498582	0.72819	0.516747	0.801852	0.460495	0.967529	0.61364	0.996185	0.606531
O15381	NVL	Nuclear valosin-containing protein-like	0.508436	0.799191	0.299318	0.730271	0.451094	0.673613	0.390818	0.772738	0.388754	0.84872	0.197935	0.645658	0.162545	0.454865	0.203958	0.478706	0.344413	0.832701	0.26155	0.447921	0.292286	0.529353	0.22624	0.694961	0.24203	0.313484	0.139426	0.438444	0.191547	0.466631	0.523424	0.383867	1.32925	1.10065	0.547827	0.557312	0.483454	0.871159	0.389732	0.702904	NA	NA	NA	NA	NA	NA	NA
O15382	BCAT2	Branched-chain-amino-acid aminotransferase, mitochondrial	0.454414	0.607526	0.257333	0.628017	0.412549	0.482839	0.351928	0.551568	0.382763	0.859573	0.441921	0.351889	0.244829	0.543826	0.262694	0.848948	0.333957	0.962132	0.292852	0.705056	0.499784	0.64561	0.450069	0.708334	0.436181	0.367923	0.394754	0.601574	0.488309	0.581824	0.631481	1.0488	0.723154	0.780575	0.67989	1.10821	0.552108	0.898554	0.792084	1.52608	0.433315	0.611733	0.361207	0.792126	0.419807	0.54222	0.41251
O15391	YY2	Transcription factor YY2	0.787276	0.864267	0.382585	0.797149	0.869415	0.756464	0.49514	0.463291	0.323885	0.50194	0.233472	0.279849	0.162246	0.592943	0.267538	0.455097	0.267997	0.572397	0.260823	0.517157	0.319437	0.681891	0.263975	0.622061	0.484288	0.450811	0.235219	0.68334	0.281665	0.611314	0.199133	0.389593	0.168434	0.874938	0.169724	0.606211	0.28219	0.821192	0.191794	0.543913	0.284571	0.502672	0.201336	0.595103	0.208265	0.708481	0.292384
O15394	NCAM2	Neural cell adhesion molecule 2	NA	NA	NA	NA	NA	NA	NA	NA	NA	NA	0.56786	0.203473	0.366524	0.270251	0.773727	0.645877	0.455062	0.285952	0.460999	0.571593	NA	NA	NA	NA	NA	NA	NA	NA	NA	NA	1.96942	3.16566	1.30552	1.05748	1.40375	1.19148	1.41479	1.15023	1.18551	1.19507	2.60073	1.26447	1.66533	1.46039	1.89609	3.43337	1.70104
O15397	IPO8	Importin-8	0.277996	0.580393	0.256416	0.668184	0.276033	0.414516	0.232776	0.477844	0.320456	0.786633	0.370721	0.560396	0.237098	0.438549	0.281375	0.506905	0.390071	0.629034	0.304739	0.49984	0.329381	0.739455	0.317429	0.627475	0.37811	0.689129	0.243506	0.527405	0.318762	0.413776	0.408012	0.603247	0.392074	0.646407	0.33602	0.493561	0.418228	0.653858	0.326326	0.553344	0.295245	0.546014	0.283001	0.589849	0.277901	0.533419	0.340133
O15399	GRIN2D	Glutamate receptor ionotropic, NMDA 2D	NA	NA	NA	NA	NA	NA	NA	NA	NA	NA	NA	NA	NA	NA	NA	NA	NA	NA	NA	NA	1.01533	1.83159	0.912663	1.40423	1.23606	1.4715	1.20046	1.19637	1.68296	4.27901	NA	NA	NA	NA	NA	NA	NA	NA	NA	NA	NA	NA	NA	NA	NA	NA	NA
O15400	STX7	Syntaxin-7	0.64868	0.882446	0.468413	0.964027	0.506815	0.719166	0.48446	0.91182	0.63519	0.842619	0.751449	1.11404	0.613741	1.35711	0.649257	1.16343	0.703125	0.946006	0.804246	1.06143	0.895107	1.07371	0.85512	1.15112	1.02888	0.896954	0.723623	1.07427	0.877817	0.952813	0.899409	0.733461	0.899861	0.959937	0.677832	0.957714	0.858999	1.01904	0.955316	1.32206	0.737493	1.02816	0.603935	1.15273	0.602282	1.0941	0.68958
O15405	TOX3	TOX high mobility group box family member 3	NA	NA	NA	NA	NA	NA	NA	NA	NA	NA	NA	NA	NA	NA	NA	NA	NA	NA	NA	NA	0.330676	0.563054	0.323823	0.546138	0.30673	0.619704	0.229444	0.342356	0.292714	0.494669	0.448187	0.258947	0.417454	0.676261	0.232181	0.416845	0.74456	0.839974	0.314047	0.620571	0.399229	0.542397	0.355114	0.773036	0.359777	0.602598	0.400694
O15427	SLC16A3	Monocarboxylate transporter 4	0.219976	1.41132	0.189243	1.6643	0.207754	0.416132	0.266737	1.58921	0.245628	0.484456	0.111721	0.512954	0.0979103	0.297954	0.0924407	0.486549	0.120755	0.518091	0.127492	0.812983	0.21414	0.402348	0.221961	0.61196	0.170295	0.434396	0.131393	0.539261	0.135015	0.672312	0.181463	0.690685	0.340771	0.849803	0.173365	0.404632	0.235056	0.46641	0.1736	0.278366	0.0962329	0.288624	0.134992	0.498446	0.0874347	0.904123	0.147619
O15431	SLC31A1	High affinity copper uptake protein 1	NA	NA	NA	NA	NA	NA	NA	NA	NA	NA	NA	NA	NA	NA	NA	NA	NA	NA	NA	NA	NA	NA	NA	NA	NA	NA	NA	NA	NA	NA	NA	NA	NA	NA	NA	NA	NA	NA	NA	NA	NA	NA	NA	NA	NA	NA	NA
O15438	ABCC3	Canalicular multispecific organic anion transporter 2	NA	NA	NA	NA	NA	NA	NA	NA	NA	NA	NA	NA	NA	NA	NA	NA	NA	NA	NA	NA	NA	NA	NA	NA	NA	NA	NA	NA	NA	NA	NA	NA	NA	NA	NA	NA	NA	NA	NA	NA	0.599627	1.18311	0.557564	0.747624	0.58473	1.01977	0.842083
O15439	ABCC4	Multidrug resistance-associated protein 4	0.744783	0.919085	0.626418	0.778572	0.73868	0.715549	0.582269	0.668691	0.62868	0.744723	0.681715	0.835218	0.642145	0.75047	0.571893	1.08029	0.692643	1.39529	0.634658	0.51053	0.6293	0.739194	0.678446	0.601601	0.583871	0.750797	0.44301	0.746466	0.600172	0.629708	1.13632	0.736557	1.0494	0.761885	0.600126	0.843729	0.966921	0.733108	0.678039	1.47827	0.670368	0.867888	0.5729	0.663043	0.561057	0.840016	0.726069
O15440	ABCC5	Multidrug resistance-associated protein 5	NA	NA	NA	NA	NA	NA	NA	NA	NA	NA	0.824049	2.71127	0.896232	1.00705	0.815219	1.70731	0.748088	1.07419	1.03646	1.07027	NA	NA	NA	NA	NA	NA	NA	NA	NA	NA	NA	NA	NA	NA	NA	NA	NA	NA	NA	NA	0.800762	1.5519	0.83663	1.16801	0.728085	4.09559	0.872193
O15446	CD3EAP	DNA-directed RNA polymerase I subunit RPA34	0.168977	0.53257	0.186846	0.657311	0.233623	0.28846	0.241539	0.487484	0.242476	0.542331	0.0925424	0.0660467	0.0915132	0.14294	0.0827314	0.14043	0.0998856	0.111635	0.0938064	0.130221	0.388652	0.81411	0.344726	0.578448	0.339876	0.634952	0.286892	0.465833	0.282805	0.693258	NA	NA	NA	NA	NA	NA	NA	NA	NA	NA	NA	NA	NA	NA	NA	NA	NA
O15455	TLR3	Toll-like receptor 3	2.36713	5.26921	1.77909	2.80507	1.81373	2.36713	1.89924	7.51618	3.23235	3.88358	0.999711	1.86942	0.916558	1.0929	1.12552	2.41771	1.36336	3.13123	1.39021	2.59059	2.31195	3.78928	1.92955	2.05526	2.64597	3.26671	1.73978	3.04728	1.81131	1.71968	2.14698	1.43972	1.70344	3.2746	1.39426	2.73701	1.87455	4.14408	1.20786	1.81332	2.09554	3.37431	1.74092	3.84588	2.27732	2.60526	2.71389
O15460	P4HA2	Prolyl 4-hydroxylase subunit alpha-2	0.495373	1.87375	0.397703	0.600286	0.355034	0.751858	0.337408	1.18573	0.436146	0.817432	0.379343	0.997548	0.261358	0.355182	0.638668	0.601543	0.421515	0.413036	0.26618	1.04183	0.535997	0.889706	0.324891	0.81811	0.174502	0.767087	0.157463	0.542093	0.2312	0.475996	0.442962	0.4412	0.479226	1.16589	0.353245	0.512322	0.41321	0.52597	0.370096	0.868717	0.273475	0.619457	0.301394	0.388185	0.278518	1.1498	0.3311
O15484	CAPN5	Calpain-5	3.13897	0.952678	1.32996	1.12009	2.32048	1.00032	2.24447	1.08938	2.44648	2.24293	2.24334	1.09889	1.28486	1.03865	1.86477	0.962751	1.4486	2.21427	2.37836	1.13327	2.60541	0.798758	3.0271	2.24475	2.16669	1.1921	2.27066	1.30774	2.08184	1.6998	2.25559	0.979701	1.34213	0.813977	1.71518	1.25955	1.52973	1.29387	1.99346	1.17402	2.4498	1.68809	2.30301	1.75194	1.52549	1.04277	2.12234
O15498	YKT6	Synaptobrevin homolog YKT6	0.47559	0.646609	0.36153	0.933795	0.358032	0.694215	0.403638	1.06638	0.450047	1.0651	0.448756	0.644069	0.294136	0.695558	0.302865	0.966659	0.392203	0.738316	0.440004	0.776255	0.660091	0.772173	0.568126	0.932895	0.428451	0.521558	0.450189	0.778628	0.450609	0.918123	0.543634	0.919694	0.492485	0.831934	0.435931	0.810721	0.512265	1.10045	0.447029	1.00049	0.500681	1.01038	0.454105	0.96629	0.472222	1.23084	0.561127
O15504	NUP42	Nucleoporin NUP42	NA	NA	NA	NA	NA	NA	NA	NA	NA	NA	0.264132	0.53993	0.28189	0.419971	0.202185	0.665486	0.336571	0.510585	0.352949	0.644239	0.22693	0.525531	0.248485	0.554191	0.29833	0.469326	0.137919	0.376666	0.16933	0.394321	NA	NA	NA	NA	NA	NA	NA	NA	NA	NA	NA	NA	NA	NA	NA	NA	NA
O15511	ARPC5	Actin-related protein 2/3 complex subunit 5	1.01746	1.32025	0.763078	1.38184	0.811253	1.07441	0.79409	1.39139	0.847252	1.30735	0.806423	1.5273	0.674931	2.12025	0.674142	1.51838	0.886353	1.40531	0.86226	1.4228	1.0173	1.60035	1.16268	1.44301	1.13186	1.12047	1.43768	1.80016	1.57977	1.57476	1.02757	1.54528	0.986836	1.46955	0.586321	1.3688	1.01101	1.63693	0.736313	1.50669	0.738556	1.16067	0.699882	1.61711	0.765515	1.6452	0.814863
O15514	POLR2D	DNA-directed RNA polymerase II subunit RPB4	NA	NA	NA	NA	NA	NA	NA	NA	NA	NA	NA	NA	NA	NA	NA	NA	NA	NA	NA	NA	NA	NA	NA	NA	NA	NA	NA	NA	NA	NA	NA	NA	NA	NA	NA	NA	NA	NA	NA	NA	NA	NA	NA	NA	NA	NA	NA
O15523	DDX3Y	ATP-dependent RNA helicase DDX3Y	0.226822	0.53875	0.175371	0.532348	0.188882	0.319423	0.159677	0.322048	0.185511	0.423284	0.29481	0.5251	0.250137	0.475945	0.253519	0.63899	0.306721	0.583866	0.30493	0.612816	0.330542	0.593353	0.30066	0.596169	0.266931	0.52077	0.233969	0.440783	0.28621	0.587861	0.255493	0.435863	0.2552	0.47368	0.213117	0.500163	0.260104	0.643142	0.205317	0.548158	0.239197	0.478449	0.231718	0.605868	0.254636	0.719576	0.289628
O15530	PDPK1	3-phosphoinositide-dependent protein kinase 1	0.758039	1.1113	0.44588	1.19254	0.829869	1.03859	0.573685	0.953625	0.727642	1.16729	NA	NA	NA	NA	NA	NA	NA	NA	NA	NA	0.950159	1.06471	0.870476	0.83951	0.857932	0.853727	0.660004	0.922362	0.836632	0.96813	0.673499	0.831348	0.570835	1.06493	0.556325	0.961483	0.614827	1.11343	0.661147	1.20454	0.659689	0.943539	0.511495	1.35091	0.641366	1.12634	0.673325
O15533	TAPBP	Tapasin	1.11732	6.73474	0.902366	4.57511	1.08439	3.36942	1.25472	4.61036	1.64294	5.06844	0.874234	2.60654	0.773208	3.67509	0.909697	3.66253	1.1849	2.70267	1.06051	2.0527	1.06712	3.66283	1.36221	2.41222	1.15265	3.00662	1.04139	5.8888	1.31448	3.85397	1.71564	7.05408	1.89475	5.4744	0.816007	3.98397	2.73351	7.45871	0.828917	4.17763	1.13675	4.32776	1.14742	6.85463	0.984659	2.33095	1.29759
O15541	RNF113A	E3 ubiquitin-protein ligase RNF113A	NA	NA	NA	NA	NA	NA	NA	NA	NA	NA	NA	NA	NA	NA	NA	NA	NA	NA	NA	NA	NA	NA	NA	NA	NA	NA	NA	NA	NA	NA	NA	NA	NA	NA	NA	NA	NA	NA	NA	NA	0.401478	0.742281	0.457747	0.793949	0.328822	0.723394	0.543833
O15550	KDM6A	Lysine-specific demethylase 6A	0.636115	1.23967	0.487537	1.28847	0.706479	1.28244	0.56943	1.15139	0.735479	1.66884	0.64599	0.826945	0.409775	0.641281	0.481729	0.813908	0.557808	0.902168	0.518815	0.724014	0.812542	1.55413	0.824706	1.50034	0.935735	0.875794	0.603298	1.20766	0.9035	1.3908	0.64185	1.37612	0.410931	0.924793	0.413363	0.908732	0.642884	1.1977	0.394207	1.00945	0.828413	0.814125	0.504884	1.00504	0.877195	1.0739	0.551558
O15551	CLDN3	Claudin-3	0.403241	2.21069	0.714311	1.42748	0.322578	4.48412	0.943931	0.952714	1.29877	4.01269	0.816744	0.862696	0.61607	2.16453	0.400385	4.79462	0.822707	5.58242	1.24312	3.10499	0.839315	1.11749	0.837708	4.29823	0.765292	1.13894	0.523498	0.737262	0.758828	1.22002	1.65702	2.66041	1.24277	1.243	0.926149	1.09399	2.75123	2.90212	0.772497	7.42225	0.730397	1.73209	0.81312	3.49739	0.968413	3.80577	1.43414
O43143	DHX15	Pre-mRNA-splicing factor ATP-dependent RNA helicase DHX15	0.330236	0.618993	0.237442	0.608688	0.386267	0.450317	0.350009	0.531828	0.334444	0.714925	0.335453	0.528732	0.271541	0.625036	0.293524	0.681113	0.375277	0.819771	0.37127	0.662443	0.315041	0.647784	0.369569	0.549797	0.391277	0.647214	0.236113	0.533114	0.337476	0.516968	0.338369	0.579686	0.243587	0.661348	0.234767	0.507719	0.374808	0.640124	0.255962	0.766705	0.271143	0.505372	0.268878	0.728473	0.235832	0.803345	0.255356
O43148	RNMT	mRNA cap guanine-N7 methyltransferase	0.373409	0.620915	0.222922	0.606602	0.340979	0.557778	0.326274	0.539066	0.318225	0.726314	0.314226	0.477762	0.238103	0.422506	0.235343	0.467778	0.31845	0.488756	0.313615	0.562332	0.302588	0.479847	0.245989	0.580957	0.26829	0.350195	0.15452	0.423308	0.256244	0.477385	0.343139	0.553129	0.317634	0.575178	0.315602	0.495053	0.381065	0.665521	0.250271	0.735733	0.270793	0.40759	0.242445	0.677669	0.291207	0.594413	0.250438
O43149	ZZEF1	Zinc finger ZZ-type and EF-hand domain-containing protein 1	0.834879	1.20862	0.529818	0.926429	0.739768	0.839734	0.778997	1.18428	0.724151	1.03672	0.956613	1.24298	0.688476	1.4985	0.723979	1.5176	0.983239	1.47983	0.787391	1.12198	0.822045	1.02476	0.909653	1.18179	0.776417	1.17489	0.701744	1.21251	0.860481	0.996918	0.669152	0.879775	0.628653	1.02067	0.583701	0.893169	0.8943	1.06449	0.474149	0.954341	0.769977	1.16309	0.832932	1.38491	0.74225	1.18223	0.8915
O43150	ASAP2	Arf-GAP with SH3 domain, ANK repeat and PH domain-containing protein 2	1.46032	1.10367	0.633757	0.832341	1.05827	0.779491	0.624799	1.0784	0.603711	1.12081	NA	NA	NA	NA	NA	NA	NA	NA	NA	NA	0.902313	1.08719	0.900095	1.01639	1.19894	0.785737	0.896927	1.37923	1.20999	1.13095	0.878371	1.09472	0.897455	1.4886	0.435069	1.19323	0.792417	1.61657	0.873955	1.21916	0.643043	0.679491	0.596818	0.813017	0.514845	0.78114	0.499271
O43155	FLRT2	Leucine-rich repeat transmembrane protein FLRT2	0.541437	0.982156	0.755334	0.69967	0.49121	0.595978	1.05438	0.706108	1.28144	0.673121	NA	NA	NA	NA	NA	NA	NA	NA	NA	NA	NA	NA	NA	NA	NA	NA	NA	NA	NA	NA	NA	NA	NA	NA	NA	NA	NA	NA	NA	NA	1.59669	1.73435	1.57227	0.902756	1.42289	1.10281	2.64541
O43156	TTI1	TELO2-interacting protein 1 homolog	0.898906	0.779064	0.635071	1.06078	0.767469	0.690897	0.731608	0.743356	0.987729	1.1169	NA	NA	NA	NA	NA	NA	NA	NA	NA	NA	0.435522	0.480015	0.477626	0.50023	0.413073	0.59424	0.477756	0.662159	0.563436	0.79419	0.183593	0.498123	0.288027	0.513695	0.178673	0.477955	0.234111	0.728433	0.15251	0.396617	NA	NA	NA	NA	NA	NA	NA
O43157	PLXNB1	Plexin-B1	NA	NA	NA	NA	NA	NA	NA	NA	NA	NA	0.558769	0.511818	0.424843	0.463522	0.518681	0.716875	0.490227	0.691931	0.556992	0.899871	1.22351	1.01684	1.54435	0.990077	1.45815	1.13762	1.36845	0.977739	1.21169	0.776065	15.0694	1.72695	2.7884	3.10107	17.6904	4.66076	9.09882	1.38381	28.9623	1.82952	0.517382	0.359682	0.406126	0.378404	0.367636	0.495926	0.447171
O43159	RRP8	Ribosomal RNA-processing protein 8	1.47955	1.18884	0.989533	1.06475	1.59178	1.34801	1.54586	1.24609	1.44124	0.996061	NA	NA	NA	NA	NA	NA	NA	NA	NA	NA	NA	NA	NA	NA	NA	NA	NA	NA	NA	NA	0.564708	0.589413	0.373372	0.645165	0.399769	0.589313	0.556909	0.664436	0.434452	0.821022	NA	NA	NA	NA	NA	NA	NA
O43166	SIPA1L1	Signal-induced proliferation-associated 1-like protein 1	0.553637	1.89683	0.417495	1.89397	0.625997	0.617712	0.576088	0.832249	0.565139	1.06806	NA	NA	NA	NA	NA	NA	NA	NA	NA	NA	NA	NA	NA	NA	NA	NA	NA	NA	NA	NA	NA	NA	NA	NA	NA	NA	NA	NA	NA	NA	NA	NA	NA	NA	NA	NA	NA
O43169	CYB5B	Cytochrome b5 type B	0.940285	1.67598	0.588479	1.91469	1.20349	1.54455	0.945678	1.22425	0.921369	1.85833	0.872622	1.19505	0.427304	1.13054	0.742477	0.8609	0.869393	1.42464	0.719534	1.46249	0.513033	0.617374	0.602153	1.0187	0.670788	0.528463	0.469547	0.991591	0.562046	1.16501	0.72787	0.888406	0.539683	0.979436	0.493462	0.777382	0.78122	0.920275	0.591979	1.14926	0.54679	0.962878	0.409264	0.83612	0.418484	0.926022	0.456525
O43172	PRPF4	U4/U6 small nuclear ribonucleoprotein Prp4	0.348164	0.81443	0.295731	0.783021	0.366156	0.443794	0.404825	0.527576	0.398788	0.837263	0.280651	0.630018	0.24329	0.624466	0.23629	0.732587	0.343388	0.843332	0.365677	0.621554	0.348347	0.770861	0.412362	0.90697	0.426504	0.642	0.275887	0.68396	0.441255	0.675925	0.384191	0.552795	0.29144	0.895392	0.261438	0.506561	0.356766	0.851602	0.333234	0.871243	0.405592	0.597561	0.361499	1.04744	0.353457	0.767409	0.432234
O43175	PHGDH	D-3-phosphoglycerate dehydrogenase	0.334204	0.519787	0.369442	0.153509	0.415423	0.436806	0.351473	0.11709	0.384303	0.388869	0.494369	0.434122	0.338293	0.329221	0.359842	0.485339	0.852035	0.74003	0.491105	1.05198	0.472251	1.01122	0.366038	0.268731	0.513913	1.14229	0.373443	0.332111	0.274088	0.334797	0.436968	0.419442	0.244301	0.26636	0.448323	0.335052	0.447603	0.48497	0.237687	0.313487	0.507847	0.592582	0.421366	0.641997	0.671115	1.05317	0.434925
O43181	NDUFS4	NADH dehydrogenase [ubiquinone] iron-sulfur protein 4, mitochondrial	1.0254	1.67386	0.675086	1.91243	0.856889	0.764333	0.960823	1.59266	1.05967	1.72288	0.480484	1.04718	0.545243	1.83237	0.379271	1.81025	1.05429	3.27367	0.847333	2.50525	NA	NA	NA	NA	NA	NA	NA	NA	NA	NA	0.612465	0.796046	0.535869	0.988781	0.132938	1.05833	0.568364	1.36673	0.428291	1.24548	0.712799	1.28128	0.625266	1.29437	0.88537	1.4136	0.675421
O43189	PHF1	PHD finger protein 1	NA	NA	NA	NA	NA	NA	NA	NA	NA	NA	NA	NA	NA	NA	NA	NA	NA	NA	NA	NA	NA	NA	NA	NA	NA	NA	NA	NA	NA	NA	1.00647	1.29516	0.762382	1.1024	0.897643	1.31138	1.04983	1.4871	0.923272	1.17137	0.840794	1.11333	0.672799	1.5543	0.87316	1.02971	0.686326
O43236	SEPTIN4	Septin-4	NA	NA	NA	NA	NA	NA	NA	NA	NA	NA	NA	NA	NA	NA	NA	NA	NA	NA	NA	NA	NA	NA	NA	NA	NA	NA	NA	NA	NA	NA	NA	NA	NA	NA	NA	NA	NA	NA	NA	NA	NA	NA	NA	NA	NA	NA	NA
O43237	DYNC1LI2	Cytoplasmic dynein 1 light intermediate chain 2	0.627666	1.17837	0.506319	0.653842	0.430112	0.500209	0.411609	0.547671	0.49688	0.828419	0.418497	0.767199	0.470665	0.515854	0.352453	0.773766	0.451788	0.657595	0.446598	1.41134	0.661205	0.847127	0.583148	0.837715	0.728168	0.720638	0.460177	0.634126	0.464189	0.630902	0.650704	0.399808	0.650424	1.1555	0.392997	0.992336	0.704116	0.957214	0.591769	1.39056	0.599476	0.751796	0.546064	1.13533	0.563948	0.783934	0.618349
O43240	KLK10	Kallikrein-10	NA	NA	NA	NA	NA	NA	NA	NA	NA	NA	2.51305	1.36548	0.883385	0.899982	3.0113	1.13707	2.08904	1.09873	0.896656	0.683848	6.31774	0.740441	1.70016	0.633432	0.680158	1.0872	0.725699	1.14919	0.731425	1.88325	NA	NA	NA	NA	NA	NA	NA	NA	NA	NA	0.500433	1.32968	0.893028	1.28943	0.950983	2.64552	1.71836
O43242	PSMD3	26S proteasome non-ATPase regulatory subunit 3	0.36302	0.650893	0.257261	0.672406	0.343859	0.448729	0.342215	0.568447	0.366635	0.648188	0.463813	0.56912	0.345236	0.691514	0.380609	0.821193	0.509177	0.726074	0.489781	0.787856	0.530194	0.804277	0.489531	0.732387	0.434696	0.77606	0.379192	0.656632	0.511278	0.708258	0.464807	0.568265	0.418155	0.581845	0.338393	0.529752	0.550615	0.86934	0.359217	0.964015	0.443857	0.648459	0.376463	0.837496	0.395632	0.807942	0.470316
O43251	RBFOX2	RNA binding protein fox-1 homolog 2	0.574701	0.932719	0.241723	0.355359	0.747515	0.378548	0.324715	0.436962	0.332049	0.656555	0.472299	0.586449	0.344863	0.383045	0.36021	0.540148	0.330327	0.749493	0.407351	0.577821	0.478227	0.705649	0.483726	0.63599	0.682941	0.800262	0.364272	0.545417	0.546315	0.72009	0.518081	0.593682	0.313787	0.754818	0.43355	0.558245	0.510212	0.6909	0.471969	0.551232	0.502991	0.458763	0.31959	0.505266	0.36498	0.598195	0.380031
O43252	PAPSS1	Bifunctional 3'-phosphoadenosine 5'-phosphosulfate synthase 1	0.264618	0.584941	0.199511	0.382722	0.228684	0.346861	0.228775	0.461749	0.257162	0.609812	0.207003	0.369501	0.164437	0.345767	0.170925	0.533131	0.240449	0.438602	0.248984	0.441904	0.417646	0.725116	0.391384	0.538606	0.340949	0.567501	0.260734	0.563316	0.356687	0.662975	0.396787	0.493132	0.343116	0.61653	0.325768	0.545455	0.465241	0.79488	0.351012	3.05927	0.27872	0.54505	0.247323	0.682756	0.259233	0.767374	0.288878
O43255	SIAH2	E3 ubiquitin-protein ligase SIAH2	NA	NA	NA	NA	NA	NA	NA	NA	NA	NA	1.07055	1.49073	0.621526	0.983239	0.840434	1.29487	0.76752	0.86226	0.933276	0.837212	NA	NA	NA	NA	NA	NA	NA	NA	NA	NA	NA	NA	NA	NA	NA	NA	NA	NA	NA	NA	1.61789	1.03301	1.16925	1.14466	1.23417	1.29007	1.59133
O43264	ZW10	Centromere/kinetochore protein zw10 homolog	0.312742	0.64571	0.269877	0.598904	0.320806	0.500258	0.322565	0.512585	0.362383	0.646815	0.451726	0.802747	0.373908	0.709381	0.377313	0.776342	0.524214	0.882295	0.544617	0.801881	0.373175	0.549494	0.275504	0.614543	0.289594	0.532121	0.308126	0.485133	0.276525	0.613658	0.534671	0.779175	0.538724	0.858317	0.422968	0.716023	0.629164	1.01185	0.385049	1.11179	0.369378	0.560232	0.335682	0.760076	0.350657	0.560844	0.42809
O43272	PRODH	Proline dehydrogenase 1, mitochondrial	NA	NA	NA	NA	NA	NA	NA	NA	NA	NA	NA	NA	NA	NA	NA	NA	NA	NA	NA	NA	NA	NA	NA	NA	NA	NA	NA	NA	NA	NA	NA	NA	NA	NA	NA	NA	NA	NA	NA	NA	0.726645	0.878052	0.715006	1.12822	0.697256	1.1808	0.695258
O43278	SPINT1	Kunitz-type protease inhibitor 1	0.95563	2.97903	0.923839	3.60662	1.12038	2.62598	1.18449	3.64283	1.45285	2.89891	1.72609	2.77731	1.15753	2.77934	1.86206	7.26957	2.03564	6.22534	1.82916	4.34385	2.68468	4.03405	1.88063	5.83857	1.42039	3.08108	1.12073	2.89964	1.4439	6.93379	1.04917	4.37859	1.21964	2.88517	0.982739	2.91471	1.3368	5.82237	0.774511	3.26426	1.13888	3.11308	1.35275	4.34618	1.51993	7.16044	2.43977
O43281	EFS	Embryonal Fyn-associated substrate	NA	NA	NA	NA	NA	NA	NA	NA	NA	NA	NA	NA	NA	NA	NA	NA	NA	NA	NA	NA	1.34369	1.88731	1.33972	1.85995	1.79641	1.52473	1.29298	1.37457	1.30724	1.78567	NA	NA	NA	NA	NA	NA	NA	NA	NA	NA	NA	NA	NA	NA	NA	NA	NA
O43290	SART1	U4/U6.U5 tri-snRNP-associated protein 1	0.367653	0.924029	0.32827	0.613575	0.340092	0.333333	0.29333	0.441499	0.335363	0.427217	0.302992	0.326206	0.238968	0.415969	0.228244	0.589684	0.249486	0.393208	0.262542	0.578255	0.339584	0.559455	0.297839	0.624509	0.305094	0.647304	0.188385	0.360555	0.221358	0.364549	0.300672	0.361716	0.354609	1.00939	0.190119	0.447588	0.346007	0.642622	0.308874	0.831705	0.356505	0.68275	0.357691	1.01214	0.448333	0.693995	0.461866
O43291	SPINT2	Kunitz-type protease inhibitor 2	1.38448	12.8508	2.64948	19.0349	1.49245	8.42331	1.93209	22.1128	3.53262	13.7302	1.92637	5.74642	1.72595	4.30884	2.1954	2.98798	3.29201	3.57738	2.54029	5.313	1.84731	2.12307	2.07998	21.6484	2.10992	2.06654	1.85535	2.14337	2.26313	2.22866	2.1555	11.5336	2.63071	3.65556	0.960327	1.59202	1.63755	2.4979	1.20192	4.17184	1.00134	4.64448	1.30191	4.16025	1.41918	4.56675	1.84872
O43292	GPAA1	Glycosylphosphatidylinositol anchor attachment 1 protein	0.888199	2.01161	0.599109	1.36214	0.870038	1.17749	0.861329	1.29645	0.861396	1.64184	0.619196	1.12985	0.462266	0.995772	0.528676	1.22306	0.667453	1.43052	0.659213	1.11369	0.715952	1.06342	0.664477	1.60087	0.691809	1.39061	0.402692	1.05463	0.506628	1.16486	0.862661	1.51549	0.722341	1.26151	0.538967	1.23775	0.774498	1.29743	0.63015	1.61553	0.551087	1.04993	0.594862	1.19791	0.587252	1.09139	0.554252
O43293	DAPK3	Death-associated protein kinase 3	0.97557	2.15248	0.484864	1.0644	0.587257	0.778392	0.466203	0.841238	0.454174	0.945857	0.518928	0.768939	0.609289	0.663243	0.514471	0.805627	0.402858	0.900624	0.531209	0.822736	0.646281	1.13147	0.808272	1.04246	1.02923	1.14494	0.987084	1.13649	0.962051	1.1751	0.569769	0.494065	0.527626	1.01734	0.706191	0.781512	0.601409	0.759095	0.525918	0.966097	0.714297	0.668745	0.549147	0.715941	0.522374	0.937046	0.589153
O43294	TGFB1I1	Transforming growth factor beta-1-induced transcript 1 protein	4.9379	2.06961	2.03348	0.907002	3.68157	1.07866	0.942678	0.911372	0.931255	1.10135	2.45338	0.961666	2.64732	0.788366	2.94864	1.01168	0.871722	1.3543	1.48548	0.737338	0.923784	0.867419	1.32946	0.951832	3.14241	1.67917	2.76066	1.22643	4.26302	1.3073	1.8582	0.888006	1.37216	1.52907	3.04046	1.85178	2.41961	0.961156	1.9447	1.53273	2.68266	1.20887	1.70657	0.847663	3.2457	1.89921	1.36983
O43295	SRGAP3	SLIT-ROBO Rho GTPase-activating protein 3	NA	NA	NA	NA	NA	NA	NA	NA	NA	NA	0.617124	0.886456	0.539028	1.11369	0.570957	1.54955	0.737215	1.82774	0.775545	1.5432	NA	NA	NA	NA	NA	NA	NA	NA	NA	NA	NA	NA	NA	NA	NA	NA	NA	NA	NA	NA	0.435989	0.43959	0.307865	0.388337	0.28316	0.615178	0.3289
O43296	ZNF264	Zinc finger protein 264	0.424651	1.10379	0.34388	0.726624	0.4107	0.501165	0.437425	0.73667	0.390638	0.966653	NA	NA	NA	NA	NA	NA	NA	NA	NA	NA	NA	NA	NA	NA	NA	NA	NA	NA	NA	NA	NA	NA	NA	NA	NA	NA	NA	NA	NA	NA	NA	NA	NA	NA	NA	NA	NA
O43298	ZBTB43	Zinc finger and BTB domain-containing protein 43	NA	NA	NA	NA	NA	NA	NA	NA	NA	NA	NA	NA	NA	NA	NA	NA	NA	NA	NA	NA	NA	NA	NA	NA	NA	NA	NA	NA	NA	NA	NA	NA	NA	NA	NA	NA	NA	NA	NA	NA	0.397875	0.642237	0.443442	0.869601	0.391133	0.881172	0.492448
O43299	AP5Z1	AP-5 complex subunit zeta-1	NA	NA	NA	NA	NA	NA	NA	NA	NA	NA	NA	NA	NA	NA	NA	NA	NA	NA	NA	NA	0.613862	1.02271	0.679861	0.994813	0.648518	0.897297	0.503618	1.20802	0.682258	0.866216	0.739706	1.1769	0.782967	1.34333	0.622786	1.20503	1.03234	1.63606	0.727882	1.0935	0.722437	1.02638	0.620891	1.75889	0.683147	1.24188	0.870462
O43301	HSPA12A	Heat shock 70 kDa protein 12A	3.61013	0.972249	1.51953	0.86664	4.61739	1.22099	2.42473	0.948957	1.67069	1.11693	2.45442	0.955591	2.00706	1.05417	2.6382	1.05236	1.35669	1.082	1.87338	0.666383	2.18647	0.873394	1.88303	0.863793	3.65167	1.22307	3.24411	1.30312	2.36111	0.969176	2.46787	0.649973	1.58767	0.80894	2.34402	1.63332	2.36546	1.14043	2.62935	3.78353	3.47821	1.75306	1.92721	1.1554	2.01977	1.0317	1.85503
O43306	ADCY6	Adenylate cyclase type 6	0.973908	1.05083	0.774646	0.992308	1.21766	0.614862	0.643754	0.714092	0.50944	0.671631	NA	NA	NA	NA	NA	NA	NA	NA	NA	NA	NA	NA	NA	NA	NA	NA	NA	NA	NA	NA	1.23779	1.1217	1.51691	1.13728	1.12163	1.26822	1.21308	1.36225	1.0568	1.62984	NA	NA	NA	NA	NA	NA	NA
O43310	CTIF	CBP80/20-dependent translation initiation factor	NA	NA	NA	NA	NA	NA	NA	NA	NA	NA	NA	NA	NA	NA	NA	NA	NA	NA	NA	NA	NA	NA	NA	NA	NA	NA	NA	NA	NA	NA	NA	NA	NA	NA	NA	NA	NA	NA	NA	NA	0.251001	0.410197	0.234291	0.500923	0.273165	0.423711	0.329467
O43312	MTSS1	Protein MTSS 1	NA	NA	NA	NA	NA	NA	NA	NA	NA	NA	NA	NA	NA	NA	NA	NA	NA	NA	NA	NA	NA	NA	NA	NA	NA	NA	NA	NA	NA	NA	NA	NA	NA	NA	NA	NA	NA	NA	NA	NA	1.03893	1.07564	1.00299	1.93711	1.22029	1.36851	1.04149
O43314	PPIP5K2	Inositol hexakisphosphate and diphosphoinositol-pentakisphosphate kinase 2	0.409303	0.709246	0.38843	0.663427	0.332869	0.608153	0.418512	0.470307	0.436459	0.907686	0.516044	0.8624	0.483746	1.03075	0.439756	0.894599	0.685393	0.851867	0.483367	0.715515	0.418692	0.601168	0.491243	0.638792	0.384943	0.569456	0.359621	0.577833	0.437124	0.557454	0.596471	0.632738	0.593017	0.926897	0.598964	0.929211	0.724749	1.19365	0.525629	0.841188	0.420464	0.572	0.422073	0.797769	0.395	0.675973	0.448045
O43318	MAP3K7	Mitogen-activated protein kinase kinase kinase 7	0.783455	0.89731	0.451775	1.38673	0.718135	0.73996	0.636688	0.968716	0.682974	1.35389	0.48544	0.817931	0.387434	0.733464	0.339058	1.07618	0.381334	0.748045	0.454047	0.94495	0.576096	0.907812	0.55147	0.775618	0.806549	0.773706	0.54733	0.753482	0.899405	0.791322	0.519813	0.680437	0.363847	0.656357	0.30886	0.670218	0.554927	0.725771	0.512752	0.669348	0.61651	0.847007	0.754191	0.897016	0.848662	1.24801	0.812733
O43324	EEF1E1	Eukaryotic translation elongation factor 1 epsilon-1	0.218808	0.394943	0.169456	0.508139	0.199508	0.344454	0.205596	0.320131	0.252515	0.445949	0.16881	0.249399	0.14762	0.293042	0.131348	0.47055	0.172935	0.454125	0.200306	0.419904	0.206989	0.398966	0.188838	0.613295	0.256031	0.281726	0.185841	0.406108	0.21314	0.4997	0.223078	0.28734	0.189621	0.24264	0.167623	0.368499	0.212444	0.37222	0.169814	0.52423	0.231442	0.289722	0.270786	0.35478	0.242864	0.374698	0.361086
O43347	MSI1	RNA-binding protein Musashi homolog 1	0.452134	0.858706	0.335814	0.900552	0.718164	0.341935	0.412826	0.630472	0.487462	1.05894	0.345249	0.451023	0.259809	0.711001	0.263785	1.15013	0.35682	1.28789	0.415068	1.13915	0.571595	0.748385	0.468498	0.983949	0.678355	0.49041	0.267919	0.72048	0.560306	0.728671	0.386557	0.649347	0.357073	0.550548	0.200446	0.532327	0.410358	1.11586	0.369084	1.86584	0.448564	0.794498	0.392784	0.722467	0.349013	0.894979	0.411264
O43353	RIPK2	Receptor-interacting serine/threonine-protein kinase 2	NA	NA	NA	NA	NA	NA	NA	NA	NA	NA	1.24666	1.20572	1.15911	1.2631	1.27941	1.42151	0.973304	1.246	1.29218	0.8083	1.38781	1.69842	1.70897	1.61494	1.44876	1.87281	1.31344	1.51244	2.29595	1.60348	0.644923	1.19298	0.673184	1.1083	0.545473	1.02592	0.908365	1.32451	0.577762	1.13146	0.748988	0.694237	0.618629	1.02018	0.534974	0.781385	0.701765
O43374	RASA4	Ras GTPase-activating protein 4	2.82292	1.22633	1.74833	1.42519	1.69202	1.21926	2.40807	1.75502	2.82166	2.14473	1.553	0.890258	1.04753	0.841271	1.36213	0.969772	0.979648	0.984217	1.37687	0.762449	1.24166	1.00468	1.06526	0.716537	1.36817	1.20502	0.996391	1.06215	1.48263	0.974405	2.96339	1.31529	2.23968	1.47458	2.38713	2.24429	2.75321	1.874	2.39082	1.11798	NA	NA	NA	NA	NA	NA	NA
O43390	HNRNPR	Heterogeneous nuclear ribonucleoprotein R	0.324503	0.627071	0.1951	0.711491	0.372929	0.494269	0.26072	0.473059	0.298651	0.802931	0.29082	0.713671	0.261611	0.638524	0.21311	0.751113	0.340781	1.00853	0.421223	0.797276	0.461868	0.888663	0.434104	0.941943	0.514397	0.62945	0.296961	0.643973	0.441943	0.716458	0.451037	0.766582	0.355734	0.780512	0.275428	0.611795	0.473025	0.897925	0.346075	1.07043	0.362431	0.600848	0.277756	0.659144	0.294668	0.764035	0.322437
O43395	PRPF3	U4/U6 small nuclear ribonucleoprotein Prp3	0.277567	0.669415	0.244179	0.650315	0.292261	0.344147	0.224217	0.40205	0.236303	0.601617	0.140913	0.168369	0.128462	0.189512	0.137611	0.361726	0.143004	0.217585	0.131532	0.389443	0.158478	0.263318	0.167428	0.304941	0.214691	0.303286	0.113607	0.205097	0.179075	0.229081	0.181126	0.217465	0.162703	0.633497	0.133396	0.281627	0.179396	0.354042	0.150708	0.643617	0.314957	0.451105	0.302873	0.617427	0.294487	0.497409	0.309153
O43396	TXNL1	Thioredoxin-like protein 1	0.609022	0.607786	0.324795	0.870185	0.505623	0.527234	0.458957	0.812445	0.455445	1.08751	0.539773	0.653281	0.368949	0.646138	0.349143	0.825597	0.512391	0.743066	0.484142	0.756067	0.766517	0.633531	0.651504	0.754645	0.709815	0.913433	0.632269	0.835335	0.928555	1.15179	0.687369	1.02354	0.578541	0.860541	0.456569	0.813207	0.772114	0.957282	0.528169	1.09245	0.699574	0.97105	0.572509	0.91256	0.571141	0.985468	0.635671
O43399	TPD52L2	Tumor protein D54	0.350543	0.453642	0.2701	0.834248	0.164822	0.383801	0.178488	0.597885	0.271029	0.544963	0.200637	0.5543	0.236984	0.487547	0.262834	0.483947	0.269492	0.487408	0.344325	0.560479	0.362508	0.398071	0.325365	0.505882	0.340791	0.285826	0.221327	0.358767	0.221798	0.530071	0.320191	0.349486	0.380307	0.558898	0.182085	0.55814	0.353074	0.666856	0.355982	0.614849	0.377358	0.438866	0.337227	0.558651	0.35648	0.525882	0.391888
O43402	EMC8	ER membrane protein complex subunit 8	0.171262	0.645931	0.114359	0.697526	0.116025	0.365002	0.100675	0.257938	0.139558	0.527839	0.801406	0.929022	0.614439	1.02918	0.610121	1.07491	0.861532	1.38899	0.696822	1.03267	0.534943	0.586628	0.459486	1.16528	0.448275	0.478594	0.482571	0.716555	0.457514	0.611616	NA	NA	NA	NA	NA	NA	NA	NA	NA	NA	0.689566	1.11992	0.588817	1.56725	0.713294	1.25636	0.658114
O43405	COCH	Cochlin	0.743912	0.918145	6.1565	1.35716	0.459455	0.739649	2.10148	0.911503	2.44019	1.02184	3.94159	1.36552	1.67507	1.06129	3.63906	1.10097	2.81909	1.00426	0.797288	1.22122	NA	NA	NA	NA	NA	NA	NA	NA	NA	NA	1.54183	0.805231	0.965366	0.893857	11.8829	1.23644	1.15805	1.21773	1.14046	1.03024	0.679682	0.733889	1.42941	0.789656	2.33772	1.13366	2.42449
O43414	ERI3	ERI1 exoribonuclease 3	0.988903	0.963349	0.432273	1.29091	0.983889	0.700458	0.537338	0.936091	0.544006	1.33036	0.81089	0.724305	0.488605	1.05596	0.601852	0.866208	0.667359	1.1812	0.683806	1.09531	0.799587	0.953774	0.5466	1.20454	0.827476	1.07579	0.590892	0.84673	0.85246	0.738409	0.757329	1.00746	0.642678	0.826786	0.635083	1.0099	0.788982	1.10798	0.732893	1.3988	0.668441	0.917941	0.553462	1.13556	0.637086	0.936776	0.593094
O43422	THAP12	52 kDa repressor of the inhibitor of the protein kinase	NA	NA	NA	NA	NA	NA	NA	NA	NA	NA	NA	NA	NA	NA	NA	NA	NA	NA	NA	NA	NA	NA	NA	NA	NA	NA	NA	NA	NA	NA	0.401285	0.545372	0.336656	0.6763	0.247523	0.497407	0.38137	0.620209	0.33613	0.470898	0.369299	0.578934	0.37856	0.617965	0.333966	0.643238	0.391152
O43423	ANP32C	Acidic leucine-rich nuclear phosphoprotein 32 family member C	0.171126	0.415964	0.143571	0.336808	0.146235	0.239607	0.173252	0.154002	0.15356	0.225429	0.174076	0.245429	0.173119	0.392593	0.127691	0.400841	0.20974	0.447621	0.244521	0.566644	0.280741	0.475846	0.228877	0.49947	0.293042	0.654164	0.169068	0.397863	0.227278	0.390064	0.243711	0.194449	0.212389	0.472271	0.126584	0.368429	0.256606	0.571151	0.167848	0.723946	0.1966	0.327578	0.147144	0.421376	0.181885	0.304879	0.160573
O43426	SYNJ1	Synaptojanin-1	1.1184	1.06357	0.640061	1.34193	1.18659	1.05565	0.880052	1.35987	0.848713	1.24544	0.81715	0.933877	0.629749	0.815546	0.715039	0.983078	0.878301	1.02785	0.919743	0.91862	0.890991	1.44937	2.60864	1.28626	1.07166	1.72701	0.952972	1.42853	1.14747	1.72056	0.463211	0.673803	0.611549	0.990141	0.37333	0.816789	0.558575	0.972563	0.585408	0.762479	1.0676	1.28417	0.802381	1.15844	0.721104	1.1651	0.880739
O43427	FIBP	Acidic fibroblast growth factor intracellular-binding protein	0.766088	0.98526	0.609452	0.84865	0.696048	0.86814	0.654343	0.792427	0.737485	1.06858	0.747057	0.845282	0.685188	0.926292	0.548349	0.973889	0.758541	1.05171	0.715127	0.954063	0.751792	1.10503	0.803955	1.31255	0.998976	0.885488	0.721345	0.904079	0.832247	0.931778	0.620484	0.859665	0.545833	0.990645	0.72651	1.0872	0.673824	1.19533	0.532648	1.33556	0.686231	0.857089	0.588744	1.10982	0.701308	0.948421	0.677772
O43432	EIF4G3	Eukaryotic translation initiation factor 4 gamma 3	0.511853	0.924233	0.28239	0.599486	0.32126	0.5025	0.324341	0.514556	0.499716	0.566996	0.327872	0.487895	0.247736	0.313456	0.344634	0.4652	0.361686	0.380191	0.39829	0.480752	0.283607	0.501644	0.264495	0.414146	0.307787	0.496275	0.227135	0.308521	0.238245	0.410838	0.310849	0.373866	0.307665	0.630123	0.204358	0.573151	0.314279	0.620559	0.254011	1.00477	0.419584	0.387043	0.28233	0.663558	0.382984	0.585388	0.380339
O43447	PPIH	Peptidyl-prolyl cis-trans isomerase H	0.438496	0.67528	0.279929	0.67181	0.377903	0.505044	0.334501	0.612428	0.359083	0.863643	0.323304	0.447713	0.232688	0.50566	0.240776	0.542821	0.277608	0.791766	0.320329	0.49812	0.396974	0.78666	0.345144	0.877274	0.369452	0.626354	0.337631	0.641963	0.375829	0.701203	0.431171	0.721643	0.323441	0.732766	0.290135	0.525919	0.396112	0.80569	0.286842	0.71187	0.322721	0.516375	0.266769	0.811805	0.303088	0.790096	0.31938
O43462	MBTPS2	Membrane-bound transcription factor site-2 protease	1.05347	1.54999	0.82957	1.22388	0.431423	0.469591	0.666935	1.63113	0.681647	0.988317	NA	NA	NA	NA	NA	NA	NA	NA	NA	NA	NA	NA	NA	NA	NA	NA	NA	NA	NA	NA	NA	NA	NA	NA	NA	NA	NA	NA	NA	NA	NA	NA	NA	NA	NA	NA	NA
O43464	HTRA2	Serine protease HTRA2, mitochondrial	1.28709	2.05366	0.694394	1.50977	1.66989	1.17425	1.05825	1.35985	0.957692	1.60185	1.10598	1.29941	0.885267	1.44137	0.815952	1.37759	1.00833	1.72501	1.03513	1.5982	0.825331	1.11551	1.02827	1.38234	1.66565	1.24216	0.831087	1.04869	1.05392	1.29283	0.98359	1.08851	0.841605	0.953954	0.553963	1.10558	1.21842	1.01557	0.81334	1.85058	0.892312	0.901564	0.714517	0.995899	0.690195	0.88926	0.693724
O43488	AKR7A2	Aflatoxin B1 aldehyde reductase member 2	0.933997	0.696412	0.540911	0.755024	0.820908	0.717022	0.775039	0.690607	0.902968	0.97064	1.0657	0.943099	0.642788	0.966035	0.668099	0.94364	0.839039	1.31928	1.11746	0.88092	1.80968	1.06163	1.2589	1.46559	1.47998	0.736835	0.974566	1.06639	1.11553	0.991483	1.36195	0.797784	0.821035	0.816227	0.787057	1.21071	1.05142	1.09387	1.15193	1.38786	0.98814	0.922957	0.702383	0.806512	0.75434	0.965881	0.892049
O43490	PROM1	Prominin-1	NA	NA	NA	NA	NA	NA	NA	NA	NA	NA	NA	NA	NA	NA	NA	NA	NA	NA	NA	NA	NA	NA	NA	NA	NA	NA	NA	NA	NA	NA	NA	NA	NA	NA	NA	NA	NA	NA	NA	NA	NA	NA	NA	NA	NA	NA	NA
O43491	EPB41L2	Band 4.1-like protein 2	1.22089	0.686099	0.710652	0.393574	1.15038	0.681482	0.847855	0.469949	0.805591	0.756275	0.634082	0.549835	0.596197	0.681498	0.659802	0.617463	0.470238	0.635279	0.812252	0.525935	0.990779	0.791208	0.956755	0.509006	1.30636	0.989135	0.908935	0.785418	0.901144	0.500801	0.884079	0.443569	0.730304	0.56271	0.645915	0.933255	0.856422	0.776017	0.940064	1.81305	1.21988	1.10165	0.767753	0.741759	0.84159	0.810448	0.913104
O43493	TGOLN2	Trans-Golgi network integral membrane protein 2	1.06923	2.67308	0.605107	1.36774	0.735539	0.760535	0.65288	2.32452	0.873164	1.2071	0.805239	2.07382	0.76702	2.06811	1.53853	1.95702	1.51668	3.04528	1.43251	2.05012	1.74644	0.741355	1.65037	2.22089	1.07268	3.40409	0.636059	1.47218	0.889831	1.42824	2.43317	2.24342	2.30901	2.06243	0.795582	1.77368	1.97579	3.38668	1.35727	6.28517	1.08596	1.49811	1.52094	1.41434	0.863387	1.63711	1.23978
O43504	LAMTOR5	Ragulator complex protein LAMTOR5	0.586142	1.06201	0.468547	0.844379	0.580911	0.769048	0.631599	1.33492	0.68687	1.26638	NA	NA	NA	NA	NA	NA	NA	NA	NA	NA	0.793012	1.02643	0.796354	1.0549	0.725564	0.85204	0.853168	1.19588	0.649523	0.842925	0.925429	0.86265	0.850339	1.40161	0.510065	1.06554	0.911202	1.21914	0.670325	1.21768	0.976299	0.819627	0.754343	1.21336	0.782277	1.00735	0.862111
O43505	B4GAT1	Beta-1,4-glucuronyltransferase 1	0.693865	0.97411	0.430364	0.874349	0.561151	0.525081	0.563283	0.882158	0.668848	0.929365	NA	NA	NA	NA	NA	NA	NA	NA	NA	NA	NA	NA	NA	NA	NA	NA	NA	NA	NA	NA	NA	NA	NA	NA	NA	NA	NA	NA	NA	NA	0.729555	0.64682	0.506877	0.467595	0.525687	0.636495	0.412934
O43513	MED7	Mediator of RNA polymerase II transcription subunit 7	NA	NA	NA	NA	NA	NA	NA	NA	NA	NA	NA	NA	NA	NA	NA	NA	NA	NA	NA	NA	NA	NA	NA	NA	NA	NA	NA	NA	NA	NA	NA	NA	NA	NA	NA	NA	NA	NA	NA	NA	NA	NA	NA	NA	NA	NA	NA
O43520	ATP8B1	Phospholipid-transporting ATPase IC	NA	NA	NA	NA	NA	NA	NA	NA	NA	NA	0.978693	1.51696	0.858576	1.25639	0.832741	1.95055	1.08185	2.87331	1.18359	2.61887	NA	NA	NA	NA	NA	NA	NA	NA	NA	NA	NA	NA	NA	NA	NA	NA	NA	NA	NA	NA	NA	NA	NA	NA	NA	NA	NA
O43556	SGCE	Epsilon-sarcoglycan	5.94657	0.955393	1.14199	0.575622	2.99993	0.948525	1.05755	0.660476	1.17026	1.06536	NA	NA	NA	NA	NA	NA	NA	NA	NA	NA	1.51915	1.54144	1.47932	1.32474	2.9265	1.17589	4.01585	2.27834	5.01249	1.59446	NA	NA	NA	NA	NA	NA	NA	NA	NA	NA	3.76162	1.30236	2.30162	1.02733	3.6269	1.58653	2.12916
O43566	RGS14	Regulator of G-protein signaling 14	NA	NA	NA	NA	NA	NA	NA	NA	NA	NA	NA	NA	NA	NA	NA	NA	NA	NA	NA	NA	NA	NA	NA	NA	NA	NA	NA	NA	NA	NA	NA	NA	NA	NA	NA	NA	NA	NA	NA	NA	0.771268	2.07554	0.816247	2.06946	0.892599	1.56735	1.02394
O43567	RNF13	E3 ubiquitin-protein ligase RNF13	0.652458	0.929268	0.482441	1.05792	0.639494	0.844586	0.646235	1.01048	1.06959	1.39681	NA	NA	NA	NA	NA	NA	NA	NA	NA	NA	NA	NA	NA	NA	NA	NA	NA	NA	NA	NA	0.523857	0.798681	0.503219	1.0116	0.442639	0.561062	0.57782	1.13103	0.452006	0.643196	NA	NA	NA	NA	NA	NA	NA
O43570	CA12	Carbonic anhydrase 12	0.818852	2.51294	1.22766	2.21973	0.549693	0.786414	1.8	10.4286	4.14499	1.92972	1.53028	5.31717	1.01823	0.938698	1.76577	1.91613	1.77338	2.81149	1.26816	17.3616	1.59249	3.32559	2.25914	0.563627	0.269779	4.83988	0.570917	0.669307	0.608925	3.09241	0.997071	4.23383	1.04607	2.78699	1.23378	2.3663	1.10262	0.770528	0.60074	1.37288	0.893243	1.94985	2.15841	2.013	1.39094	9.24996	2.77534
O43572	AKAP10	A-kinase anchor protein 10, mitochondrial	NA	NA	NA	NA	NA	NA	NA	NA	NA	NA	NA	NA	NA	NA	NA	NA	NA	NA	NA	NA	NA	NA	NA	NA	NA	NA	NA	NA	NA	NA	1.39746	0.530113	0.963719	0.574161	0.605	0.572809	1.5846	0.635822	1.1142	0.630727	0.283057	0.467706	0.259737	0.518413	0.283237	0.526137	0.346632
O43583	DENR	Density-regulated protein	0.510022	0.876271	0.398895	0.800111	0.366268	0.525497	0.354344	0.535593	0.486809	0.628592	0.329635	0.585447	0.324121	0.686394	0.344526	0.73537	0.443667	0.838388	0.387951	0.787136	0.619469	0.984961	0.573475	1.03457	0.506256	0.709725	0.472334	0.820457	0.572136	0.917834	0.523903	0.788103	0.513224	0.877533	0.286749	0.828956	0.480823	0.99641	0.451331	1.19981	NA	NA	NA	NA	NA	NA	NA
O43586	PSTPIP1	Proline-serine-threonine phosphatase-interacting protein 1	0.833045	1.2978	0.773764	1.92708	1.02389	1.214	1.23213	1.5641	1.04543	1.50106	NA	NA	NA	NA	NA	NA	NA	NA	NA	NA	NA	NA	NA	NA	NA	NA	NA	NA	NA	NA	NA	NA	NA	NA	NA	NA	NA	NA	NA	NA	1.62552	2.26138	1.70149	2.77948	1.44662	1.81789	1.49266
O43592	XPOT	Exportin-T	0.390237	0.653134	0.349276	1.0947	0.399123	0.623554	0.450759	0.781145	0.491885	1.1151	0.537583	0.740874	0.40839	0.614392	0.379128	0.732421	0.499129	0.699411	0.461778	0.692181	0.508174	0.862583	0.502339	0.876102	0.46124	0.884664	0.384129	0.81383	0.482559	0.93937	0.587529	0.924971	0.482925	1.05584	0.410727	0.731622	0.579928	0.934933	0.367908	0.825539	0.464674	0.72669	0.459042	0.916339	0.445836	1.02251	0.614585
O43598	DNPH1	2'-deoxynucleoside 5'-phosphate N-hydrolase 1	0.755358	0.666944	0.492365	0.984453	0.695031	0.854174	0.450639	0.637248	0.391745	0.51848	0.563535	0.682401	0.558449	0.950615	0.608694	0.815976	0.539213	0.917702	0.700884	0.5789	0.711735	0.806344	0.565558	0.80247	0.707541	0.79853	0.524885	0.951833	0.742115	0.678019	0.526478	0.637705	0.509117	0.898525	0.528756	0.783979	0.565246	1.04008	0.548378	0.942456	0.623006	0.82836	0.585402	1.06764	0.557681	0.816017	0.572215
O43602	DCX	Neuronal migration protein doublecortin	3.68691	0.899747	1.1789	0.818277	1.19249	1.20254	1.01812	0.954391	1.45184	1.11582	2.60704	1.12494	1.22863	1.21091	1.77255	1.07321	1.34655	0.916615	1.77218	1.42339	1.54987	0.817022	1.53195	0.949169	1.39818	1.17763	1.44366	1.19262	1.47253	0.812356	2.54208	1.00343	2.24879	1.32764	1.32365	1.73627	1.75502	1.37882	2.79224	1.08049	2.20163	1.01165	1.35356	0.983273	1.30812	0.907644	1.45435
O43615	TIMM44	Mitochondrial import inner membrane translocase subunit TIM44	0.476564	0.892851	0.194732	0.943505	0.350724	0.467905	0.282811	0.493035	0.371371	0.999299	0.305365	0.667899	0.326348	0.494234	0.22055	0.760498	0.364746	0.700883	0.346315	0.627027	0.417628	0.691947	0.449298	0.849859	0.454879	0.589479	0.315286	0.559211	0.416139	0.724205	0.412519	0.460659	0.404887	0.468468	0.282552	0.617409	0.434263	0.910898	0.294381	0.702055	0.395308	0.61068	0.338599	0.71094	0.390916	0.707985	0.430074
O43617	TRAPPC3	Trafficking protein particle complex subunit 3	NA	NA	NA	NA	NA	NA	NA	NA	NA	NA	0.41572	0.430882	0.297783	0.558721	0.39842	0.708808	0.363358	0.741163	0.459702	0.551651	0.230073	0.557115	0.218247	0.576477	0.228835	0.595451	0.15127	0.441438	0.262334	0.645807	0.195889	0.663942	0.234349	0.575833	0.108623	0.46902	0.230157	0.687848	0.140954	0.532676	0.150826	0.430873	0.124157	0.555932	0.151105	0.574324	0.171089
O43633	CHMP2A	Charged multivesicular body protein 2a	0.22501	0.35539	0.202082	0.395919	0.209507	0.310729	0.148198	0.279132	0.164576	0.360524	NA	NA	NA	NA	NA	NA	NA	NA	NA	NA	0.188216	0.325139	0.093354	0.38425	0.0977034	0.1171	0.0557178	0.259674	0.0936771	0.211996	0.182132	0.211929	0.294498	0.52949	0.145134	0.301847	0.149575	0.339694	0.224609	0.428384	0.202132	0.470755	0.160283	0.520699	0.183574	0.520122	0.173378
O43639	NCK2	Cytoplasmic protein NCK2	1.8739	1.19214	0.838962	1.04964	1.21333	1.98007	1.21651	1.38518	1.13806	2.2887	1.32232	1.36587	1.17424	1.01951	0.908117	1.39823	0.910968	1.35946	0.953089	2.32746	0.930987	1.61138	0.83597	1.46217	1.18008	0.800918	1.29123	1.09461	1.26382	1.54478	1.24876	1.67227	0.993415	1.67862	1.03842	1.3859	1.17064	2.0208	0.938083	1.36264	1.10555	1.15728	0.971035	1.50779	1.15064	1.67132	0.999072
O43657	TSPAN6	Tetraspanin-6	NA	NA	NA	NA	NA	NA	NA	NA	NA	NA	0.344451	0.325972	0.21036	0.363807	0.330521	0.579513	0.314562	0.852384	0.332868	0.475484	NA	NA	NA	NA	NA	NA	NA	NA	NA	NA	0.243003	0.402076	0.315379	0.510752	0.128827	0.406924	0.267034	0.599813	0.214213	0.449246	0.240451	0.469078	0.272468	0.405612	0.231329	0.465234	0.274396
O43660	PLRG1	Pleiotropic regulator 1	0.314317	0.913556	0.249771	0.738283	0.421146	0.495254	0.351486	0.61717	0.32757	0.825805	0.408786	0.610334	0.283865	0.635796	0.261061	0.80097	0.387521	0.89492	0.439284	0.67789	0.376057	0.862756	0.419522	0.822851	0.428856	0.48992	0.280178	0.847455	0.402099	0.712571	0.37042	0.761556	0.304658	0.861754	0.28231	0.560784	0.430162	0.912944	0.316571	0.722079	0.31927	0.656059	0.328911	0.910397	0.285125	0.790235	0.359138
O43663	PRC1	Protein regulator of cytokinesis 1	NA	NA	NA	NA	NA	NA	NA	NA	NA	NA	NA	NA	NA	NA	NA	NA	NA	NA	NA	NA	NA	NA	NA	NA	NA	NA	NA	NA	NA	NA	0.366442	1.11274	0.338063	1.38804	0.341796	1.00972	0.457503	1.58011	0.282249	1.08941	NA	NA	NA	NA	NA	NA	NA
O43665	RGS10	Regulator of G-protein signaling 10	NA	NA	NA	NA	NA	NA	NA	NA	NA	NA	0.454841	0.796936	0.490112	0.968019	0.345116	0.739413	0.427283	1.01518	0.762974	0.442813	0.970618	1.32477	0.759759	0.99632	0.925249	0.933514	0.861237	1.90027	0.699005	1.08253	1.01001	1.23754	0.6583	0.957953	0.509682	1.31434	1.04789	1.12608	0.580625	0.666281	0.600961	1.02862	0.576071	1.20295	0.573349	1.00703	0.629418
O43670	ZNF207	BUB3-interacting and GLEBS motif-containing protein ZNF207	0.334929	0.964505	0.286848	1.10335	0.55438	0.755782	0.289524	0.546475	0.424514	1.01784	0.579033	1.17293	0.489387	0.956341	0.555091	1.1206	0.594539	1.29409	0.575613	1.12973	NA	NA	NA	NA	NA	NA	NA	NA	NA	NA	0.557843	0.790824	0.330379	0.811894	0.242531	0.628011	0.401846	0.897302	0.422132	0.920946	0.317631	0.719256	0.309551	0.865104	0.300212	0.954475	0.308699
O43674	NDUFB5	NADH dehydrogenase [ubiquinone] 1 beta subcomplex subunit 5, mitochondrial	7.39636	4.68419	1.90405	2.16055	4.25961	2.13019	1.28341	2.56997	1.42268	2.31149	0.156605	0.264208	0.266631	0.274106	0.168168	0.627726	0.153285	0.520795	0.249506	0.497748	0.611916	0.450188	0.448589	0.486677	0.507355	0.407269	0.603567	0.479535	0.348486	0.496092	0.247247	0.383085	0.301058	0.386362	0.301695	0.403273	0.337848	0.506144	0.228733	0.433983	0.687726	0.746284	0.512786	0.759614	0.579304	1.08298	0.608265
O43676	NDUFB3	NADH dehydrogenase [ubiquinone] 1 beta subcomplex subunit 3	0.66562	1.0207	0.464997	1.55627	0.575515	1.13222	0.612288	0.908097	0.756467	1.47156	1.00624	0.877055	0.582321	1.18714	0.639478	1.47651	0.995154	2.26925	0.83521	1.58751	1.03453	1.06923	0.991326	1.47895	0.85203	0.507352	0.869631	1.30689	1.06241	1.52434	0.667815	0.994786	0.61457	0.817351	0.637437	0.884229	0.833069	1.36122	0.559193	1.41457	0.667453	1.3844	0.654475	1.10731	0.663183	1.63818	0.780212
O43677	NDUFC1	NADH dehydrogenase [ubiquinone] 1 subunit C1, mitochondrial	NA	NA	NA	NA	NA	NA	NA	NA	NA	NA	0.63339	0.725648	0.52311	0.735159	0.581942	0.897201	0.552326	1.45366	0.605161	1.02005	NA	NA	NA	NA	NA	NA	NA	NA	NA	NA	0.515854	0.912444	0.667881	0.713996	0.556378	1.01786	0.813373	0.966541	0.389164	1.17386	NA	NA	NA	NA	NA	NA	NA
O43678	NDUFA2	NADH dehydrogenase [ubiquinone] 1 alpha subcomplex subunit 2	NA	NA	NA	NA	NA	NA	NA	NA	NA	NA	0.393144	0.540805	0.282862	0.626522	0.281489	0.971711	0.36082	1.66959	0.416435	1.16151	NA	NA	NA	NA	NA	NA	NA	NA	NA	NA	0.455637	0.607882	0.490445	0.555241	0.606171	0.673415	0.553199	0.913798	0.495879	0.891069	0.407813	0.526949	0.363733	0.433541	0.372641	0.665782	0.395608
O43679	LDB2	LIM domain-binding protein 2	0.867044	0.90104	0.450954	0.690035	1.25094	0.741001	0.763684	0.667695	0.734545	0.86133	0.525894	1.43421	0.44553	0.590771	0.376523	1.19485	0.698715	1.10573	0.812706	1.32483	NA	NA	NA	NA	NA	NA	NA	NA	NA	NA	0.866358	0.975081	0.652909	1.06231	0.47608	1.26677	0.827596	1.28213	0.783182	1.13233	NA	NA	NA	NA	NA	NA	NA
O43681	ASNA1	ATPase ASNA1	0.751022	1.12593	0.490522	1.13633	0.60585	0.90352	0.785208	0.959483	0.707792	1.14839	0.667736	0.932905	0.442624	0.87353	0.466645	0.974124	0.662246	0.977951	0.661542	0.990778	0.653076	0.919645	0.657802	0.971378	0.604442	0.70856	0.519553	1.0418	0.572607	0.946047	0.837181	1.34989	0.745359	1.41556	0.61684	1.07824	0.926362	1.3787	0.56724	1.08458	0.675431	0.982177	0.553558	1.13206	0.528773	0.856	0.627619
O43683	BUB1	Mitotic checkpoint serine/threonine-protein kinase BUB1	NA	NA	NA	NA	NA	NA	NA	NA	NA	NA	NA	NA	NA	NA	NA	NA	NA	NA	NA	NA	NA	NA	NA	NA	NA	NA	NA	NA	NA	NA	NA	NA	NA	NA	NA	NA	NA	NA	NA	NA	NA	NA	NA	NA	NA	NA	NA
O43684	BUB3	Mitotic checkpoint protein BUB3	0.380089	0.836484	0.250193	0.993691	0.444596	0.627624	0.375295	0.706885	0.387764	0.98265	0.335283	0.716133	0.271982	0.567162	0.269108	0.709474	0.344826	0.737969	0.347107	0.640926	0.313543	0.708772	0.367214	0.739482	0.384332	0.631875	0.233173	0.6043	0.42712	0.725719	0.341118	0.715976	0.270381	0.772658	0.25213	0.554047	0.417275	0.891801	0.28297	0.759205	0.333371	0.595492	0.314477	0.798195	0.278021	0.813775	0.313579
O43688	PLPP2	Phospholipid phosphatase 2	NA	NA	NA	NA	NA	NA	NA	NA	NA	NA	0.564148	1.31784	0.36992	1.27796	0.448583	1.11158	0.539524	1.54991	0.487618	0.541798	0.730945	1.09069	0.688267	1.76188	0.649119	0.835488	0.456907	0.543508	0.552079	1.41298	0.625797	1.1511	0.491063	1.71468	0.763837	1.18251	0.640015	1.95303	0.518731	4.13196	0.462716	1.18967	0.642499	1.5927	0.452638	1.44083	0.390554
O43707	ACTN4	Alpha-actinin-4	0.774754	1.46456	0.315909	0.893898	0.635944	0.985605	0.314318	0.847103	0.339153	1.05756	0.96145	0.79751	0.621703	0.683541	0.601159	0.85873	0.590184	0.961553	0.607573	1.08259	0.634496	1.03854	0.682125	3.44523	0.984426	0.703452	1.0141	1.03232	1.40695	1.11693	0.722474	1.23689	0.600038	1.12447	0.746669	1.00808	0.674227	0.834326	0.593375	1.08789	0.602704	0.720246	0.481191	0.88576	0.557276	1.02245	0.56629
O43708	GSTZ1	Maleylacetoacetate isomerase	0.493427	0.569432	0.287524	0.696331	0.321283	0.485865	0.350128	0.606988	0.471251	0.798245	0.649898	0.658946	0.654879	1.24196	0.686563	1.47977	0.813271	1.48478	0.513891	1.2364	1.1058	1.45623	1.00201	1.42138	1.07166	1.4529	0.867651	1.24082	1.25816	1.84767	0.932161	1.3166	0.494076	0.636558	0.639218	0.950675	0.636973	0.709371	0.929191	2.8627	0.756544	0.960707	0.520474	1.10649	0.626321	0.650252	0.611191
O43709	BUD23	Probable 18S rRNA (guanine-N(7))-methyltransferase	NA	NA	NA	NA	NA	NA	NA	NA	NA	NA	0.12671	0.0744662	0.0821576	0.192925	0.11797	0.120745	0.10911	0.199345	0.146567	0.118587	0.194013	0.244794	0.211817	0.349069	0.237305	0.269437	0.144077	0.257912	0.214612	0.297354	0.300513	0.406331	0.205334	0.601453	0.213218	0.388188	0.266263	0.475967	0.233376	0.507647	NA	NA	NA	NA	NA	NA	NA
O43716	GATC	Glutamyl-tRNA(Gln) amidotransferase subunit C, mitochondrial	NA	NA	NA	NA	NA	NA	NA	NA	NA	NA	0.348849	0.639028	0.337715	0.470042	0.318168	0.757368	0.356284	0.626793	0.447047	0.593705	NA	NA	NA	NA	NA	NA	NA	NA	NA	NA	0.520397	0.511553	0.592895	0.654034	0.24622	0.822748	0.63857	1.57601	0.307717	1.65356	0.311693	0.788374	0.321753	0.720263	0.366563	0.511828	0.409353
O43719	HTATSF1	HIV Tat-specific factor 1	0.290771	0.541072	0.339877	0.447625	0.316298	0.315093	0.176866	0.355896	0.308891	0.362893	0.23406	0.46596	0.195214	0.420528	0.210002	0.892411	0.237033	0.404435	0.2231	0.49545	0.478888	0.706761	0.455624	0.532964	0.597883	0.69896	0.371952	0.399704	0.37679	0.407723	0.286272	0.500433	0.326386	1.1146	0.206045	0.663652	0.308419	0.742503	0.258751	0.698565	0.420442	0.704172	0.227503	1.05682	0.297251	0.484673	0.264083
O43734	TRAF3IP2	Adapter protein CIKS	1.65936	2.57885	1.06247	0.925948	1.74704	3.99618	1.23013	2.28813	2.12322	2.6271	1.51003	3.32201	1.50772	2.88877	2.05123	3.32935	2.3278	2.05672	1.82655	3.38858	NA	NA	NA	NA	NA	NA	NA	NA	NA	NA	NA	NA	NA	NA	NA	NA	NA	NA	NA	NA	1.59288	3.03186	1.47463	3.12744	1.18926	3.69423	1.656
O43741	PRKAB2	5'-AMP-activated protein kinase subunit beta-2	1.30849	1.7105	1.16944	1.29859	0.446795	0.71982	0.277198	1.30618	0.693965	0.872068	NA	NA	NA	NA	NA	NA	NA	NA	NA	NA	1.03118	0.902451	1.29078	0.740294	1.15469	1.42139	1.07869	0.729911	0.689422	1.01157	NA	NA	NA	NA	NA	NA	NA	NA	NA	NA	1.33459	1.16859	0.989253	1.32762	1.71511	1.29305	1.06055
O43747	AP1G1	AP-1 complex subunit gamma-1	0.58979	1.10769	0.404577	1.1311	0.516622	0.733505	0.600384	0.829688	0.63575	1.06691	0.512609	0.80577	0.379664	0.868564	0.377542	0.804131	0.613704	1.01216	0.558103	1.18465	0.610896	0.850264	0.565693	1.11866	0.547149	0.71296	0.433157	0.874223	0.52412	0.885453	0.616815	0.887959	0.574161	1.04149	0.428796	0.916603	0.943895	1.23861	0.424394	1.89624	0.509283	0.782604	0.478069	0.967539	0.436	0.74421	0.555825
O43752	STX6	Syntaxin-6	NA	NA	NA	NA	NA	NA	NA	NA	NA	NA	0.343879	0.591072	0.258986	0.511856	0.253766	0.494607	0.263609	0.606434	0.371065	0.620208	0.693133	0.870867	0.704625	1.14504	0.652705	1.05184	0.502529	0.94897	0.457853	0.919226	0.367927	0.612537	0.468212	0.724595	0.277322	0.636387	0.425797	0.649341	0.337577	0.868465	0.865754	0.879145	0.915959	1.09328	0.87575	0.949304	0.885972
O43759	SYNGR1	Synaptogyrin-1	0.998986	0.675637	0.652482	0.938526	1.1429	0.966192	1.16121	0.894185	1.20752	0.899054	NA	NA	NA	NA	NA	NA	NA	NA	NA	NA	1.39686	0.807271	0.914195	0.9527	1.1836	0.897815	0.935006	1.03344	0.960942	0.892445	NA	NA	NA	NA	NA	NA	NA	NA	NA	NA	NA	NA	NA	NA	NA	NA	NA
O43760	SYNGR2	Synaptogyrin-2	0.641485	0.917739	0.476366	1.37306	0.512131	1.04122	0.560884	1.27246	0.563322	0.883417	1.44537	2.06087	0.947303	1.6192	0.728683	2.14201	0.600439	1.19153	0.926988	2.06605	0.906161	1.65443	0.858765	2.0678	0.851081	1.11485	0.743506	1.45906	0.807494	1.41446	0.584953	1.71723	0.594156	1.11548	0.410977	1.00813	0.585401	1.85674	0.390421	1.3651	0.622078	1.61408	0.640575	2.1169	0.622924	1.69651	0.663666
O43761	SYNGR3	Synaptogyrin-3	NA	NA	NA	NA	NA	NA	NA	NA	NA	NA	NA	NA	NA	NA	NA	NA	NA	NA	NA	NA	NA	NA	NA	NA	NA	NA	NA	NA	NA	NA	NA	NA	NA	NA	NA	NA	NA	NA	NA	NA	NA	NA	NA	NA	NA	NA	NA
O43765	SGTA	Small glutamine-rich tetratricopeptide repeat-containing protein alpha	0.487591	0.597779	0.330205	0.586093	0.41364	0.581383	0.426209	0.601731	0.428153	0.967529	0.556348	0.732514	0.354446	0.627907	0.390752	0.751468	0.536954	0.664396	0.479233	0.739336	0.707797	0.801673	0.676085	0.799883	0.726683	0.68345	0.539719	0.753801	0.719082	0.930764	0.47397	0.609334	0.376036	0.698337	0.321011	0.66674	0.499184	0.928537	0.333701	0.91599	0.600926	0.727763	0.411091	0.815794	0.475727	0.86454	0.506428
O43772	SLC25A20	Mitochondrial carnitine/acylcarnitine carrier protein	0.973695	1.15815	0.470377	1.15359	0.793321	1.37044	0.824283	1.14052	0.965068	1.25363	0.985315	1.00284	0.624341	1.57216	0.749572	1.37497	0.929316	1.3777	0.809568	1.03136	0.732302	1.01514	0.852007	1.26112	0.615677	1.14288	0.765568	1.38451	0.884786	0.938307	0.888953	1.08804	0.779533	0.681639	0.73011	1.02723	0.983432	1.21649	0.706711	1.56116	0.704204	1.35494	0.868678	1.48114	0.822573	1.20068	0.745422
O43776	NARS	Asparagine--tRNA ligase, cytoplasmic	0.39755	0.628524	0.297907	0.730165	0.324533	0.381807	0.333758	0.567813	0.347591	0.66974	0.262739	0.53678	0.254983	0.402086	0.243406	0.547346	0.319344	0.5534	0.333948	0.646092	0.410702	0.456863	0.393405	0.653459	0.354732	0.613381	0.28227	0.480699	0.362818	0.615947	0.423821	0.653007	0.370481	0.575579	0.262852	0.536898	0.431784	0.694086	0.310085	0.743628	0.34474	0.574699	0.312575	0.667678	0.31621	0.637515	0.340179
O43790	KRT86	Keratin, type II cuticular Hb6	NA	NA	NA	NA	NA	NA	NA	NA	NA	NA	NA	NA	NA	NA	NA	NA	NA	NA	NA	NA	NA	NA	NA	NA	NA	NA	NA	NA	NA	NA	NA	NA	NA	NA	NA	NA	NA	NA	NA	NA	2.02804	1.09121	1.57552	0.930936	0.843514	0.872991	10.6913
O43795	MYO1B	Unconventional myosin-Ib	0.960746	4.68258	0.754292	2.79417	0.933811	1.01283	0.813604	2.27096	0.806134	2.75151	0.646796	1.79985	0.756254	1.05983	0.681837	1.89481	0.850762	2.29647	0.886672	3.29319	0.99296	2.324	1.02049	1.69269	1.03064	1.56266	0.767223	1.6694	0.974923	2.66388	0.996608	2.42445	0.669836	2.57342	0.826161	1.81138	0.925647	0.876127	0.734855	1.16255	0.778214	1.25237	0.655699	1.19145	0.67456	2.34712	0.764714
O43805	SSNA1	Sjoegren syndrome nuclear autoantigen 1	0.828709	1.34878	0.70838	1.86715	0.76023	1.4858	0.718185	1.83482	0.72167	2.93648	0.71733	1.70174	0.582307	1.22217	0.5586	1.43852	0.672774	1.31306	0.786281	1.02408	0.486491	1.51313	0.616717	1.38712	0.680519	1.28859	0.504805	1.43448	0.577655	1.52387	0.947658	1.5963	0.770722	2.67083	0.560876	1.4451	0.829141	1.81272	0.617677	1.2248	NA	NA	NA	NA	NA	NA	NA
O43808	SLC25A17	Peroxisomal membrane protein PMP34	0.114294	0.509331	0.13887	0.585167	0.221469	0.359401	0.191565	0.415925	0.173555	0.548369	0.139928	0.660208	0.20947	0.396653	0.17892	0.48414	0.339079	0.416323	0.192924	0.675339	NA	0.322509	NA	0.506423	0.0964314	0.301222	0.103711	0.30405	0.130743	0.330315	0.305915	0.496503	0.271964	0.564665	0.32335	0.524945	0.366128	0.631304	0.372813	1.04039	0.106439	0.191294	0.113833	0.357693	0.125492	0.201135	0.175007
O43809	NUDT21	Cleavage and polyadenylation specificity factor subunit 5	0.43672	1.00214	0.309458	1.19506	0.494921	0.973289	0.349998	0.615418	0.43013	1.62108	0.230357	0.467457	0.189419	0.455521	0.188951	0.719719	0.216598	0.747818	0.358206	0.734285	0.392289	1.56797	0.407333	0.98313	0.559078	1.0851	0.188558	0.752557	0.319458	1.31045	0.194251	0.70349	0.202671	0.508806	0.132024	0.390925	0.212401	0.585491	0.215635	0.564447	0.267746	0.55938	0.218204	0.604039	0.218612	0.593972	0.255711
O43813	LANCL1	Glutathione S-transferase LANCL1	0.900417	0.365179	0.396445	0.448162	0.730213	0.491386	0.488146	0.553933	0.531806	0.535383	0.861443	0.505078	0.592034	0.502919	0.60904	0.589213	0.611316	0.784391	0.634276	1.11795	0.500284	0.474455	0.513146	0.480394	0.693065	0.49239	0.653118	0.612553	0.783689	0.584436	0.564242	0.526067	0.51106	0.538216	0.587758	0.734274	0.582091	0.742501	0.568081	1.08788	0.481417	0.501079	0.304162	0.551879	0.466105	0.432775	0.349502
O43815	STRN	Striatin	1.12396	1.01282	0.862548	1.0431	0.832915	0.880415	0.754487	1.13961	0.88422	1.11106	0.365202	0.842025	0.397972	0.580622	0.370943	0.874017	0.475753	0.650775	0.463396	0.841461	0.680473	1.03829	0.665018	0.990247	0.695171	0.786764	0.56508	0.867367	0.729446	0.897177	0.605797	0.843375	0.62578	0.903325	0.454483	0.836594	0.638502	1.04063	0.610418	0.926488	0.633178	0.685042	0.501477	0.98509	0.433513	0.761029	0.550298
O43818	RRP9	U3 small nucleolar RNA-interacting protein 2	0.357553	0.841532	0.305346	0.782112	0.372331	0.478878	0.346711	0.459481	0.347635	0.939195	0.339605	0.373014	0.253641	0.365204	0.258157	0.448806	0.356209	0.459188	0.336817	0.364071	0.286683	0.550391	0.319177	0.609133	0.219423	0.340657	0.199832	0.446937	0.267292	0.507406	0.295801	0.518252	0.298545	0.409569	0.266912	0.47828	0.366108	0.583773	0.248022	0.421652	0.309487	0.453603	0.276372	0.621681	0.322188	0.637463	0.373394
O43819	SCO2	Protein SCO2 homolog, mitochondrial	0.469294	0.772616	0.290206	1.07557	0.390596	0.57783	0.472499	0.651913	0.435924	0.754039	0.263117	0.392461	0.251505	0.526704	0.262607	0.623191	0.386421	0.800351	0.300198	0.503377	0.295389	0.307554	0.234818	0.445976	0.287173	0.354063	0.197591	0.326375	0.294065	0.468767	NA	NA	NA	NA	NA	NA	NA	NA	NA	NA	0.451612	0.505546	0.365152	0.782765	0.358818	0.494428	0.425343
O43822	CFAP410	Cilia- and flagella-associated protein 410	1.66095	1.42716	0.927851	0.94755	1.80002	1.23138	1.41765	0.939217	1.38061	1.70117	NA	NA	NA	NA	NA	NA	NA	NA	NA	NA	1.19582	1.37667	1.28992	1.21541	1.72485	1.46105	1.22804	1.60049	1.24338	0.950744	NA	NA	NA	NA	NA	NA	NA	NA	NA	NA	NA	NA	NA	NA	NA	NA	NA
O43823	AKAP8	A-kinase anchor protein 8	0.249896	0.870936	0.161952	0.947017	0.184149	0.478437	0.177106	0.378011	0.181083	0.992405	0.371047	0.797059	0.301864	0.595194	0.281974	0.914357	0.313071	0.771825	0.435384	0.667198	0.385714	0.825159	0.335908	0.751196	0.321601	0.706556	0.253513	0.596384	0.265743	0.832249	0.609188	0.596279	0.539575	1.35318	0.357981	0.876513	0.616052	1.17545	0.420952	1.00006	0.395792	0.783688	0.249407	0.767532	0.251296	0.719166	0.32916
O43824	GTPBP6	Putative GTP-binding protein 6	0.385689	0.602783	0.273289	0.395604	0.418253	0.331896	0.31596	0.296942	0.366671	1.25146	NA	NA	NA	NA	NA	NA	NA	NA	NA	NA	NA	NA	NA	NA	NA	NA	NA	NA	NA	NA	NA	NA	NA	NA	NA	NA	NA	NA	NA	NA	NA	NA	NA	NA	NA	NA	NA
O43826	SLC37A4	Glucose-6-phosphate exchanger SLC37A4	0.40215	0.888848	0.338209	0.69746	0.557653	0.748935	0.557705	0.929071	0.566434	0.881171	0.478893	0.709076	0.418239	1.2919	0.534368	0.868828	0.652377	1.31602	0.786212	1.14398	0.673149	0.676974	0.676174	0.770822	0.686942	0.656789	0.435853	0.946398	0.560207	0.793845	NA	NA	NA	NA	NA	NA	NA	NA	NA	NA	NA	NA	NA	NA	NA	NA	NA
O43837	IDH3B	Isocitrate dehydrogenase [NAD] subunit beta, mitochondrial	0.69916	1.39822	0.332793	1.09009	0.374279	0.667322	0.351258	0.942295	0.516704	0.81845	0.55471	1.0237	0.480233	1.11261	0.5226	1.68576	0.672548	1.5869	0.589688	1.47624	0.713158	1.0397	0.738825	1.12803	0.684214	0.889212	0.542916	1.03858	0.611006	1.08917	0.62876	1.04319	0.648185	0.778457	0.491465	1.04453	0.738397	1.39767	0.536927	1.36644	0.509924	0.854792	0.479661	1.38944	0.501331	0.928665	0.57849
O43847	NRDC	Nardilysin	0.225871	0.492564	0.204132	0.837296	0.198829	0.429228	0.25106	0.534642	0.278587	0.823849	0.254075	0.501198	0.182075	0.448349	0.187726	0.585783	0.296066	0.509226	0.235387	0.405632	0.417653	0.66973	0.410706	0.842109	0.335908	0.668351	0.303466	0.655496	0.33586	0.910944	0.375179	0.864999	0.316601	0.595534	0.226283	0.488615	1.3545	0.907144	0.153807	0.693852	0.339916	0.583299	0.307483	0.856537	0.317773	0.877775	0.37277
O43852	CALU	Calumenin	0.136372	0.591212	0.222753	0.390731	0.103887	0.188708	0.100477	0.373295	0.132481	0.269989	0.153294	0.419134	0.291158	0.434171	0.163889	0.638852	0.207493	0.295298	0.152667	0.446251	0.591327	0.357708	0.273127	0.45926	0.249656	0.442655	0.10419	0.24922	0.106688	0.263083	0.302686	0.25826	0.522985	0.558068	0.084824	0.538211	0.177107	0.447731	0.324837	1.20153	0.268078	0.400162	0.166345	0.399701	0.321494	0.412137	0.343224
O43854	EDIL3	EGF-like repeat and discoidin I-like domain-containing protein 3	0.33211	0.435874	0.263888	0.286472	0.630646	0.231277	0.261493	0.297328	0.255808	0.289897	0.516265	0.324801	0.293342	0.375063	0.362153	0.381575	0.303941	0.365394	0.355162	0.387495	0.246828	0.278407	0.216518	0.343857	0.722166	0.323729	0.26865	0.285021	0.30478	0.305869	0.287003	0.24952	0.217896	0.308113	0.233923	0.324936	0.28633	0.374035	0.260279	0.313564	0.299184	0.190303	0.249449	0.23755	0.25186	0.236168	0.279629
O43861	ATP9B	Probable phospholipid-transporting ATPase IIB	0.691306	0.978055	0.713782	1.04174	0.822694	1.1277	0.791572	1.05784	0.817418	1.01086	1.7933	1.02068	1.3112	1.05713	1.14871	1.15426	1.53109	1.19964	15.6291	1.28369	NA	NA	NA	NA	NA	NA	NA	NA	NA	NA	NA	NA	NA	NA	NA	NA	NA	NA	NA	NA	NA	NA	NA	NA	NA	NA	NA
O43865	AHCYL1	S-adenosylhomocysteine hydrolase-like protein 1	1.01785	1.28449	0.638391	1.00031	1.10299	0.89037	1.0342	1.06265	0.934788	1.26793	0.948846	0.870519	0.676257	1.03975	0.676696	1.11152	0.835167	1.32403	0.870808	1.17882	0.784366	1.04401	0.916021	1.07686	1.01716	1.21123	0.789261	0.987579	1.11873	0.971997	0.913503	0.989627	0.713488	0.812292	0.664603	1.00595	1.03143	1.11164	0.726743	1.82224	0.913878	1.00431	0.820612	1.06126	0.80692	1.06782	0.777565
O43866	CD5L	CD5 antigen-like	6.71161	3.7059	4.82076	3.32457	3.02019	1.78801	4.7503	3.72395	4.34529	4.87485	13.1966	2.18685	7.21499	1.55436	1.93445	1.22351	5.41313	1.52927	3.59398	2.38172	4.03683	2.36734	2.9536	2.04912	2.5373	2.11399	4.48656	2.80148	2.21066	2.43519	3.4633	1.43124	2.87653	2.17561	4.18245	2.17443	5.08417	1.8281	2.88665	2.29936	4.42599	1.84456	5.91324	1.84664	5.69348	2.50938	10.2374
O43895	XPNPEP2	Xaa-Pro aminopeptidase 2	NA	NA	NA	NA	NA	NA	NA	NA	NA	NA	NA	NA	NA	NA	NA	NA	NA	NA	NA	NA	NA	NA	NA	NA	NA	NA	NA	NA	NA	NA	NA	NA	NA	NA	NA	NA	NA	NA	NA	NA	NA	NA	NA	NA	NA	NA	NA
O43896	KIF1C	Kinesin-like protein KIF1C	0.435866	0.769695	0.293093	0.482185	0.26942	0.500786	0.316884	0.475648	0.376782	0.479688	0.448143	0.403628	0.495284	0.52801	0.560701	0.541786	0.374788	0.543773	0.334134	0.630549	0.331552	0.335552	0.240227	0.457866	0.252905	0.469779	0.156441	0.278659	0.15713	0.279999	NA	NA	NA	NA	NA	NA	NA	NA	NA	NA	0.395136	0.498252	0.386294	0.684718	0.331199	0.532241	0.465593
O43909	EXTL3	Exostosin-like 3	NA	NA	NA	NA	NA	NA	NA	NA	NA	NA	NA	NA	NA	NA	NA	NA	NA	NA	NA	NA	0.778378	0.965072	0.69529	1.20611	0.647617	0.816865	0.508437	0.953835	0.638655	0.999625	NA	NA	NA	NA	NA	NA	NA	NA	NA	NA	0.640672	1.12218	0.604595	0.85917	0.517417	1.21549	0.694664
O43913	ORC5	Origin recognition complex subunit 5	0.321287	0.635456	0.240063	0.720697	0.296329	0.405284	0.253094	0.392561	0.279655	0.727086	0.326403	0.758357	0.280771	0.657085	0.239518	0.77395	0.352162	0.817816	0.340604	0.733143	0.258979	0.460401	0.225752	0.645604	0.368264	0.291762	0.227247	0.397405	0.250526	0.484356	0.349267	0.326965	0.292247	0.51162	0.304638	0.461042	0.418008	0.632303	0.28271	0.424877	0.441908	0.383318	0.276789	0.546213	0.310395	0.380903	0.274375
O43920	NDUFS5	NADH dehydrogenase [ubiquinone] iron-sulfur protein 5	0.251104	0.795588	0.182043	1.11245	0.220953	0.29546	0.162453	0.41942	0.231187	0.404132	0.167723	0.220488	0.134816	0.427302	0.155275	0.757921	0.216598	0.581655	0.16434	0.593389	0.449501	0.583773	0.254411	0.816926	0.302363	0.255971	0.259174	0.511007	0.255584	0.587	0.253661	0.287151	0.341298	0.576509	0.251533	0.506833	0.354264	0.675817	0.224929	1.34159	0.329157	0.685169	0.226516	0.712014	0.281243	0.669464	0.330914
O43924	PDE6D	Retinal rod rhodopsin-sensitive cGMP 3',5'-cyclic phosphodiesterase subunit delta	NA	NA	NA	NA	NA	NA	NA	NA	NA	NA	0.804705	0.940213	0.57793	0.907538	0.484248	1.21216	0.554089	1.3196	0.553479	0.952463	NA	NA	NA	NA	NA	NA	NA	NA	NA	NA	1.048	0.964597	0.848696	0.903439	0.724579	1.19626	1.11175	1.16284	0.833326	1.23333	0.666417	0.998318	0.436717	0.754345	0.485003	1.1489	0.563166
O43929	ORC4	Origin recognition complex subunit 4	0.182015	0.764756	0.169878	0.986953	0.278046	0.571845	0.169295	0.422725	0.193241	1.15474	0.249663	0.563721	0.152403	0.494524	0.15289	0.616021	0.194457	0.729114	0.259653	0.611729	0.510777	0.828324	0.587736	0.957397	0.972477	0.691184	0.451529	0.595381	0.688706	0.656701	0.286756	0.54552	0.225307	0.466968	0.253908	0.428952	0.317622	0.59441	0.253752	0.460186	0.417709	0.559743	0.385035	0.847133	0.287719	0.719628	0.293736
O43930	PRKY	Putative serine/threonine-protein kinase PRKY	0.335152	0.680069	0.332707	0.631594	0.306996	0.435396	0.343988	0.541992	0.324542	0.579727	NA	NA	NA	NA	NA	NA	NA	NA	NA	NA	NA	NA	NA	NA	NA	NA	NA	NA	NA	NA	NA	NA	NA	NA	NA	NA	NA	NA	NA	NA	0.356708	0.647781	0.222656	1.09496	0.348207	0.734135	0.333033
O43933	PEX1	Peroxisome biogenesis factor 1	1.0263	1.42136	0.824504	1.2494	1.04538	0.908196	1.04714	1.18313	1.4623	1.63523	0.434823	0.674358	0.286735	0.605887	0.307614	0.806156	0.424694	0.985316	0.474188	0.573503	NA	NA	NA	NA	NA	NA	NA	NA	NA	NA	0.406691	0.831688	0.389581	0.987667	0.298211	0.808172	0.514821	1.24189	0.361538	1.32121	NA	NA	NA	NA	NA	NA	NA
O43934	MFSD11	UNC93-like protein MFSD11	0.889411	1.32639	0.558081	1.49891	1.01995	1.15542	0.936968	1.53053	0.856255	2.29812	0.757139	1.35774	0.448287	1.23621	0.739553	1.37014	0.616575	1.29243	0.728786	1.21467	NA	NA	NA	NA	NA	NA	NA	NA	NA	NA	NA	NA	NA	NA	NA	NA	NA	NA	NA	NA	NA	NA	NA	NA	NA	NA	NA
O60216	RAD21	Double-strand-break repair protein rad21 homolog	0.394864	1.22119	0.389332	0.810709	0.546781	0.592729	0.421275	0.538757	0.432086	0.902217	0.450064	0.94864	0.475423	0.74904	0.432968	1.06761	0.49871	1.13339	0.582347	0.842249	0.429646	1.0939	0.467225	0.772151	0.745531	0.749536	0.306767	0.645397	0.407503	0.604204	0.467388	0.572274	0.373658	0.960759	0.327399	0.764471	0.509491	0.942278	0.501116	0.805539	0.656911	0.650297	0.511171	0.975144	0.502293	0.751852	0.606038
O60218	AKR1B10	Aldo-keto reductase family 1 member B10	0.777094	1.35531	1.87	1.2337	0.643118	1.51111	1.48824	6.05527	3.03875	4.26422	2.16461	4.13471	1.03657	2.77178	1.91543	1.78513	3.88266	1.40228	1.30492	1.96514	2.79906	2.92743	1.92454	5.32385	0.595229	0.868867	0.573953	0.920434	0.694259	5.02389	0.921664	4.11637	1.76893	6.48334	1.62477	7.85828	1.33974	2.06735	0.656623	1.06527	0.818967	1.35521	2.18857	11.1539	2.01076	6.52789	3.1541
O60220	TIMM8A	Mitochondrial import inner membrane translocase subunit Tim8 A	NA	NA	NA	NA	NA	NA	NA	NA	NA	NA	0.383347	0.416049	0.410694	0.573628	0.299498	0.716608	0.553947	0.951979	0.504648	0.601574	NA	NA	NA	NA	NA	NA	NA	NA	NA	NA	NA	NA	NA	NA	NA	NA	NA	NA	NA	NA	NA	NA	NA	NA	NA	NA	NA
O60231	DHX16	Pre-mRNA-splicing factor ATP-dependent RNA helicase DHX16	0.538684	0.609077	0.433323	0.635032	0.470293	0.42616	0.366682	0.416131	0.433313	0.71778	0.329609	0.457207	0.216984	0.452335	0.30865	0.614816	0.302874	0.614195	0.321676	0.325532	0.261595	0.623169	0.264517	0.542831	0.289907	0.533283	0.205728	0.434282	0.215346	0.462581	0.43403	0.821389	0.351255	0.966032	0.337442	0.632488	0.497726	0.927704	0.342434	0.807936	0.413076	0.603873	0.361879	0.785798	0.354756	0.686139	0.443572
O60232	ZNRD2	Protein ZNRD2	0.429814	0.919545	0.326489	0.695036	0.42242	0.519235	0.438469	0.910031	0.372234	1.00052	0.291831	0.558689	0.228712	0.489518	0.469122	0.707345	0.450355	0.415189	0.569329	0.48024	NA	NA	NA	NA	NA	NA	NA	NA	NA	NA	0.196834	0.378252	0.202277	0.407234	0.181045	0.257144	0.276264	0.428281	0.133454	0.49933	0.239545	0.422606	0.238298	0.74027	0.282309	0.3744	0.23157
O60234	GMFG	Glia maturation factor gamma	1.99446	3.06792	2.48652	11.3504	1.31243	3.80865	2.38653	7.57085	2.62316	8.8925	2.2304	2.52226	1.73839	6.18693	1.36682	4.80603	1.92266	3.78843	2.35664	1.66058	2.28981	4.87278	2.81022	3.31086	1.89015	1.81271	2.07092	6.73139	1.41482	3.81055	4.60778	9.69448	5.97737	5.09665	1.92579	6.85903	8.22584	10.0519	2.59642	3.88029	1.46379	4.43998	1.50947	4.81131	1.62831	3.51829	1.91406
O60235	TMPRSS11D	Transmembrane protease serine 11D	NA	NA	NA	NA	NA	NA	NA	NA	NA	NA	2.18656	2.24378	1.02304	1.1402	1.44934	3.82546	1.51513	1.14411	1.20182	5.18665	4.10673	4.18595	2.96863	2.95678	1.31419	1.88927	1.54861	1.2791	1.35717	1.94274	0.978021	2.2967	1.73442	1.52285	2.22409	3.12487	1.34035	4.80615	0.735591	1.17839	0.680436	2.86371	1.627	1.62463	1.75108	6.56397	4.79998
O60237	PPP1R12B	Protein phosphatase 1 regulatory subunit 12B	9.86456	2.06143	2.52465	1.06308	4.01591	1.81928	2.87181	1.05848	3.12553	1.48711	NA	NA	NA	NA	NA	NA	NA	NA	NA	NA	1.6083	1.93686	1.63877	1.83031	4.82903	1.51304	3.36014	2.02092	3.30386	1.98194	NA	NA	NA	NA	NA	NA	NA	NA	NA	NA	NA	NA	NA	NA	NA	NA	NA
O60238	BNIP3L	BCL2/adenovirus E1B 19 kDa protein-interacting protein 3-like	NA	NA	NA	NA	NA	NA	NA	NA	NA	NA	NA	NA	NA	NA	NA	NA	NA	NA	NA	NA	NA	NA	NA	NA	NA	NA	NA	NA	NA	NA	NA	NA	NA	NA	NA	NA	NA	NA	NA	NA	NA	NA	NA	NA	NA	NA	NA
O60240	PLIN1	Perilipin-1	NA	NA	NA	NA	NA	NA	NA	NA	NA	NA	NA	NA	NA	NA	NA	NA	NA	NA	NA	NA	NA	NA	NA	NA	NA	NA	NA	NA	NA	NA	NA	NA	NA	NA	NA	NA	NA	NA	NA	NA	NA	NA	NA	NA	NA	NA	NA
O60244	MED14	Mediator of RNA polymerase II transcription subunit 14	NA	NA	NA	NA	NA	NA	NA	NA	NA	NA	1.08679	0.373487	0.933331	0.399369	0.835887	0.373487	0.958151	0.389937	0.854397	0.328773	1.12367	0.443398	1.13	0.438022	1.16388	0.459851	1.15589	0.381302	1.11448	0.296038	NA	NA	NA	NA	NA	NA	NA	NA	NA	NA	0.327311	0.547074	0.291622	0.904979	0.313877	0.873241	0.33504
O60245	PCDH7	Protocadherin-7	2.00867	4.80134	1.67665	2.45154	2.01389	1.05177	2.50271	1.91002	2.59943	3.80724	NA	NA	NA	NA	NA	NA	NA	NA	NA	NA	2.0473	2.54149	2.3581	1.71418	1.65003	4.04554	1.66632	2.29957	2.0928	2.92547	0.368518	0.574239	0.482256	0.864411	0.238037	0.540277	0.334524	0.611221	0.375337	1.20952	2.38766	2.3706	3.14143	4.07955	2.09851	4.19114	2.99202
O60256	PRPSAP2	Phosphoribosyl pyrophosphate synthase-associated protein 2	0.590547	0.744718	0.410546	0.700385	0.649119	0.557762	0.582936	0.790648	0.552841	0.776891	0.517441	0.506917	0.349516	0.616899	0.36837	0.761331	0.485485	0.663718	0.50956	0.679596	0.50992	0.748578	0.488154	0.913073	0.672892	0.59828	0.335582	0.784048	0.49541	0.635765	0.490362	0.523718	0.392846	0.592765	0.348154	0.560723	0.556957	0.649625	0.392962	0.656347	0.479169	0.617175	0.380834	0.654669	0.369476	0.705909	0.405517
O60264	SMARCA5	SWI/SNF-related matrix-associated actin-dependent regulator of chromatin subfamily A member 5	0.27165	0.884033	0.253186	0.461327	0.269999	0.372206	0.254392	0.423869	0.261413	0.854109	0.244972	0.422593	0.208206	0.492162	0.246453	0.606671	0.272909	0.658654	0.275185	0.50693	0.316857	0.758307	0.293711	0.637049	0.329625	0.513104	0.28047	0.631325	0.270539	0.593718	0.276536	0.515393	0.201057	0.700065	0.21945	0.424971	0.274172	0.618619	0.269309	0.568868	0.258053	0.388993	0.263253	0.64865	0.244354	0.640025	0.302746
O60266	ADCY3	Adenylate cyclase type 3	NA	NA	NA	NA	NA	NA	NA	NA	NA	NA	NA	NA	NA	NA	NA	NA	NA	NA	NA	NA	0.872625	0.879745	0.907898	0.835583	0.842223	0.735137	0.598109	0.952584	0.741755	0.88289	1.31071	1.0908	1.19384	0.993006	0.853354	1.1345	1.15806	1.17173	0.965817	1.12451	1.42958	0.970577	1.3069	1.68611	1.23662	1.23566	0.927526
O60268	KIAA0513	Uncharacterized protein KIAA0513	NA	NA	NA	NA	NA	NA	NA	NA	NA	NA	NA	NA	NA	NA	NA	NA	NA	NA	NA	NA	1.25891	1.23133	1.31314	1.16992	0.982142	1.1157	0.960099	1.6812	1.02546	1.43685	NA	NA	NA	NA	NA	NA	NA	NA	NA	NA	NA	NA	NA	NA	NA	NA	NA
O60271	SPAG9	C-Jun-amino-terminal kinase-interacting protein 4	0.502115	0.501652	0.345316	0.535789	0.357962	0.321369	0.287161	0.478028	0.3638	0.504562	0.339391	0.727216	0.415854	0.522113	0.354791	0.677234	0.431233	0.465438	0.418268	0.681333	0.410904	0.556911	0.462574	0.537041	0.519397	0.586629	0.354988	0.460734	0.370133	0.602889	0.61112	0.531285	0.526497	0.677545	0.497728	0.73709	0.724289	0.723553	0.633884	0.656193	0.510607	0.605167	0.476087	0.709337	0.481738	0.636531	0.51819
O60282	KIF5C	Kinesin heavy chain isoform 5C	NA	NA	NA	NA	NA	NA	NA	NA	NA	NA	NA	NA	NA	NA	NA	NA	NA	NA	NA	NA	NA	NA	NA	NA	NA	NA	NA	NA	NA	NA	NA	NA	NA	NA	NA	NA	NA	NA	NA	NA	NA	NA	NA	NA	NA	NA	NA
O60287	URB1	Nucleolar pre-ribosomal-associated protein 1	0.327839	0.932184	0.246514	0.729402	0.331626	0.446411	0.354595	0.488167	0.419745	0.855307	0.536759	0.726107	0.537717	0.660644	0.625665	0.674859	0.736372	0.802831	0.553261	0.728922	0.558042	0.620252	0.617852	0.681121	0.561744	0.73122	0.504018	0.619284	0.646017	0.770603	0.952128	0.594886	0.482742	0.702543	0.459377	0.713777	0.729689	0.822467	0.568394	0.711465	0.337104	0.43964	0.388218	0.590163	0.283786	0.629027	0.390807
O60292	SIPA1L3	Signal-induced proliferation-associated 1-like protein 3	1.51511	2.77792	1.09226	1.64844	1.46677	1.11823	1.19286	1.82187	1.20645	1.90738	NA	NA	NA	NA	NA	NA	NA	NA	NA	NA	1.02241	1.54217	2.27877	5.55201	1.11866	1.23921	0.911509	1.0981	0.961989	1.42542	NA	NA	NA	NA	NA	NA	NA	NA	NA	NA	NA	NA	NA	NA	NA	NA	NA
O60293	ZFC3H1	Zinc finger C3H1 domain-containing protein	0.437926	0.801804	0.362098	1.03781	0.393667	0.538646	0.332966	0.540421	0.357871	0.556878	NA	NA	NA	NA	NA	NA	NA	NA	NA	NA	0.368839	0.751544	0.308998	0.717204	0.417128	0.531617	0.262321	0.816854	0.356183	0.738257	0.383454	0.38108	0.403287	0.905482	0.199462	0.61476	0.457803	0.829722	0.41513	1.08897	NA	NA	NA	NA	NA	NA	NA
O60306	AQR	RNA helicase aquarius	0.439296	1.01244	0.362167	0.829109	0.552237	0.635915	0.547333	0.568704	0.544867	1.13218	0.418861	0.711291	0.33305	0.683305	0.332351	0.723265	0.449907	1.03291	0.472268	0.744584	0.410239	0.862752	0.484074	0.920797	0.49318	0.660568	0.305888	0.722309	0.42486	0.839631	0.53216	0.747518	0.410059	1.04294	0.386155	0.700031	0.567471	1.1752	0.40358	0.740411	0.392429	0.596688	0.433051	0.850406	0.401875	0.782307	0.357054
O60312	ATP10A	Probable phospholipid-transporting ATPase VA	NA	NA	NA	NA	NA	NA	NA	NA	NA	NA	0.978693	1.51696	0.858576	1.25639	0.832741	1.95055	1.08185	2.87331	1.18359	2.61887	NA	NA	NA	NA	NA	NA	NA	NA	NA	NA	NA	NA	NA	NA	NA	NA	NA	NA	NA	NA	NA	NA	NA	NA	NA	NA	NA
O60313	OPA1	Dynamin-like 120 kDa protein, mitochondrial	0.820519	1.31642	0.541354	1.46722	0.869258	0.757103	0.805722	1.08304	0.865655	2.59303	0.803555	1.81967	0.601872	1.13497	0.630947	1.77946	0.778247	1.68754	0.816884	1.56339	0.908948	1.42391	0.876989	2.03911	1.04084	1.4424	0.877711	1.34155	1.00135	1.30447	0.849643	1.16772	0.75666	1.60073	0.728916	1.523	0.944236	2.12204	0.78529	1.55025	0.817315	1.53658	0.707532	1.17688	0.741539	2.49777	0.792357
O60315	ZEB2	Zinc finger E-box-binding homeobox 2	2.07323	1.48316	1.63993	1.28529	0.891541	1.6544	1.35821	1.16687	1.59618	1.87756	1.20373	1.31477	1.49333	1.58544	1.55963	1.54934	1.22616	1.80601	1.85009	0.854881	NA	NA	NA	NA	NA	NA	NA	NA	NA	NA	NA	NA	NA	NA	NA	NA	NA	NA	NA	NA	NA	NA	NA	NA	NA	NA	NA
O60318	MCM3AP	Germinal-center associated nuclear protein	0.505571	0.922146	0.405381	0.918379	0.613775	0.600577	0.657565	0.619466	0.57557	0.805872	0.573753	0.879295	0.398677	0.819626	0.383616	0.898706	0.559612	0.840762	0.615284	0.785622	1.08746	1.12487	1.90653	1.31633	2.56664	2.57874	6.51096	3.69288	3.93959	0.946957	0.596542	0.694766	0.456619	0.832863	0.472226	0.744189	0.66294	0.853101	0.486746	0.952761	0.793096	0.713136	0.603839	0.852179	0.623761	1.03311	0.69658
O60330	PCDHGA12	Protocadherin gamma-A12	2.51781	2.99451	2.90297	1.4633	2.93463	1.47562	2.87976	3.09925	3.0697	2.49631	0.597571	1.16011	0.505297	0.994055	0.667869	1.12749	0.691319	1.22413	0.755088	1.50352	1.34642	0.863942	1.49175	0.799833	1.23722	0.910673	0.955427	1.15502	1.27422	1.0194	2.36194	1.93999	1.80064	1.30363	1.54914	1.51166	2.23246	1.39593	1.92982	1.29585	NA	NA	NA	NA	NA	NA	NA
O60331	PIP5K1C	Phosphatidylinositol 4-phosphate 5-kinase type-1 gamma	NA	NA	NA	NA	NA	NA	NA	NA	NA	NA	NA	NA	NA	NA	NA	NA	NA	NA	NA	NA	NA	NA	NA	NA	NA	NA	NA	NA	NA	NA	NA	NA	NA	NA	NA	NA	NA	NA	NA	NA	1.4662	1.89486	1.45652	1.78494	1.64237	1.55233	1.26638
O60333	KIF1B	Kinesin-like protein KIF1B	0.337366	0.445336	0.216499	0.38083	0.314427	0.345931	0.267729	0.417525	0.282403	0.484048	0.585362	0.654374	0.400247	0.648823	0.483265	0.708244	0.504095	0.682724	0.497628	0.591335	0.374916	0.428104	0.387237	0.539408	0.412806	0.596538	0.289098	0.502464	0.417971	0.538225	0.378488	0.384927	0.322657	0.521146	0.264116	0.47939	0.347092	0.448654	0.321749	0.484866	0.25635	0.311142	0.208019	0.510153	0.287236	0.591765	0.374654
O60336	MAPKBP1	Mitogen-activated protein kinase-binding protein 1	2.20579	1.47792	0.937495	0.999882	1.51345	1.26088	1.06129	0.873735	1.15822	1.26963	NA	NA	NA	NA	NA	NA	NA	NA	NA	NA	0.352611	0.321809	0.32512	0.359201	0.331464	0.448694	0.289383	0.365545	0.362909	0.44327	NA	NA	NA	NA	NA	NA	NA	NA	NA	NA	NA	NA	NA	NA	NA	NA	NA
O60341	KDM1A	Lysine-specific histone demethylase 1A	0.593889	1.07608	0.432467	1.09908	0.644158	0.712132	0.549797	0.810114	0.608669	1.29242	0.558749	0.878379	0.429581	0.695014	0.405778	0.738997	0.557693	0.99251	0.563029	0.837934	0.461763	0.81775	0.503118	0.811292	0.54733	0.600515	0.360467	0.678418	0.528371	0.7583	0.577783	0.988404	0.490315	0.97541	0.554751	0.717612	0.59099	0.886158	0.633233	0.866108	0.425484	0.596213	0.383005	0.793897	0.368723	0.968864	0.406313
O60343	TBC1D4	TBC1 domain family member 4	0.626034	1.94069	0.680566	0.967544	0.593824	0.887101	0.778936	0.690577	0.901201	1.17419	NA	NA	NA	NA	NA	NA	NA	NA	NA	NA	0.875986	1.78208	0.954839	0.989088	0.855675	1.3855	0.57581	0.906491	0.745114	0.81362	0.845594	0.703599	0.834811	1.07306	0.664407	1.16637	1.03882	1.37097	0.779493	1.7712	0.78105	0.792702	0.805016	0.844182	0.662544	1.00961	1.00408
O60353	FZD6	Frizzled-6	0.809938	3.93263	0.888928	1.89791	0.878021	3.30534	1.03522	1.95958	1.13595	3.29942	NA	NA	NA	NA	NA	NA	NA	NA	NA	NA	NA	NA	NA	NA	NA	NA	NA	NA	NA	NA	0.747226	2.08579	0.679646	1.82643	0.910359	2.09874	0.674862	2.33285	0.793807	2.17735	NA	NA	NA	NA	NA	NA	NA
O60361	NME2P1	Putative nucleoside diphosphate kinase	0.220716	0.255689	0.112333	0.491131	0.148297	0.219262	0.167456	0.359856	0.150666	0.41271	0.227151	0.352746	0.126753	0.240989	0.137891	0.371802	0.19568	0.28096	0.165395	0.33987	0.291526	0.421516	0.200621	0.367725	0.169631	0.17313	0.169873	0.35085	0.170028	0.537287	0.277604	0.487548	0.292817	0.54462	0.217245	0.438011	0.326257	0.651644	0.180375	0.567017	0.147196	0.285034	0.130304	0.41075	0.156679	0.357692	0.218189
O60381	HBP1	HMG box-containing protein 1	NA	NA	NA	NA	NA	NA	NA	NA	NA	NA	NA	NA	NA	NA	NA	NA	NA	NA	NA	NA	NA	NA	NA	NA	NA	NA	NA	NA	NA	NA	NA	NA	NA	NA	NA	NA	NA	NA	NA	NA	NA	NA	NA	NA	NA	NA	NA
O60427	FADS1	Acyl-CoA (8-3)-desaturase	0.192483	0.68666	0.158816	0.33619	0.167152	0.203275	0.222384	0.230496	0.191538	0.642537	NA	NA	NA	NA	NA	NA	NA	NA	NA	NA	0.541652	0.624762	0.536827	0.843724	0.592006	0.588009	0.385932	0.7573	0.596929	0.61438	0.606117	0.89999	0.569451	0.992807	0.357139	0.833954	0.622911	1.04288	0.579232	0.988201	NA	NA	NA	NA	NA	NA	NA
O60437	PPL	Periplakin	0.600217	1.38143	1.15655	0.874823	0.762857	1.85199	1.1365	1.27956	2.15202	1.2362	1.27652	1.25026	0.802339	1.0889	0.698543	1.69919	1.31826	1.9233	1.45969	2.6077	1.29019	1.61658	1.08676	2.13634	0.683082	0.588151	0.650011	1.15924	0.706317	1.55887	1.16627	1.58914	0.894893	1.46013	1.08658	1.46662	1.43644	2.54751	0.959494	1.41491	0.816555	1.1752	0.965822	1.63696	1.7018	1.65142	1.69824
O60443	GSDME	Gasdermin-E	0.612465	0.96862	0.342815	0.898055	0.541147	0.431039	0.442767	0.906098	0.387809	0.820318	0.28261	0.391815	0.287	0.236028	0.219707	0.293373	0.260655	0.208843	0.310181	1.15229	0.510436	0.617279	0.517088	0.371561	0.594521	0.496642	0.43684	0.593152	0.837824	0.848364	0.86619	1.27096	0.607252	1.66422	0.412786	0.570197	0.502322	0.419879	0.506616	0.456011	0.570423	0.588322	0.4163	0.445459	0.517642	0.742664	0.482431
O60449	LY75	Lymphocyte antigen 75	0.794191	1.66605	0.583086	1.65606	0.880125	1.25367	0.742397	1.28244	0.904156	1.31598	1.02088	1.35187	0.818959	1.94485	0.858071	2.05264	1.18382	1.77839	0.972357	1.42048	1.04006	2.0105	1.11795	2.00955	0.782204	1.46721	0.822691	2.32883	0.936995	1.92555	1.44242	2.61041	1.15696	1.81885	0.932185	2.52187	1.43904	2.11419	0.942191	1.37565	0.95571	2.27971	0.892059	3.07162	0.887176	1.75619	1.05483
O60462	NRP2	Neuropilin-2	3.23799	1.66623	1.14455	1.34571	2.66036	1.51674	1.25683	1.3002	0.960366	1.90059	NA	NA	NA	NA	NA	NA	NA	NA	NA	NA	0.671095	1.02294	0.930663	0.918195	1.89949	1.87946	1.08482	1.30274	1.83036	1.45772	1.03432	1.02201	0.872556	1.32794	1.51241	1.40771	1.45105	1.21349	1.02628	1.91253	1.4903	1.50372	1.04097	1.30387	1.37467	1.87143	0.85327
O60476	MAN1A2	Mannosyl-oligosaccharide 1,2-alpha-mannosidase IB	0.703946	1.67903	0.626309	1.37091	0.673923	1.44029	0.853959	1.32257	0.950426	1.67485	0.74183	1.12116	0.516466	1.02927	0.910104	1.46312	0.905364	1.19538	0.56183	0.808274	0.737683	0.986142	0.824203	1.28146	0.702014	1.2145	0.58625	1.24676	0.63548	0.965243	NA	NA	NA	NA	NA	NA	NA	NA	NA	NA	NA	NA	NA	NA	NA	NA	NA
O60486	PLXNC1	Plexin-C1	1.88718	2.77	1.70964	1.96031	1.55039	2.82591	2.75236	2.44209	2.62396	3.09105	1.37117	2.36217	1.56905	2.71008	1.56666	1.88664	1.81845	2.18508	1.65348	0.924054	2.84636	3.09666	4.01038	2.4417	2.39176	3.32337	2.02879	4.82225	1.993	3.82339	2.58044	2.35301	2.32377	2.30877	1.81173	3.47433	3.20438	3.10852	2.13453	2.10363	3.27652	2.66321	2.80493	2.98458	2.32677	2.24497	3.07064
O60487	MPZL2	Myelin protein zero-like protein 2	1.59359	4.3426	1.67576	5.60411	2.17696	4.85679	2.79416	5.59408	4.47281	4.01528	NA	NA	NA	NA	NA	NA	NA	NA	NA	NA	2.61469	3.40261	2.68216	4.10431	1.30664	1.50989	1.66827	2.5704	1.35139	4.67551	3.52751	7.4049	2.54617	4.16841	2.63926	2.45555	2.63342	1.32004	2.02533	9.69081	NA	NA	NA	NA	NA	NA	NA
O60488	ACSL4	Long-chain-fatty-acid--CoA ligase 4	0.323446	0.856346	0.244578	1.16485	0.285323	0.413019	0.38708	0.587239	0.334826	0.715889	0.257544	0.409223	0.24134	0.551786	0.226466	0.68235	0.266447	0.711408	0.281748	0.486087	0.459115	0.538077	0.376369	0.548014	0.28982	0.416159	0.279344	0.790875	0.28494	0.727407	0.347734	0.376418	0.360735	0.58465	0.286833	0.541969	0.442562	0.678873	0.196845	4.40605	0.255961	0.625611	0.265673	0.607022	0.257029	0.492416	0.330319
O60493	SNX3	Sorting nexin-3	0.439235	0.62564	0.410813	0.76693	0.300588	0.615681	0.313623	0.786089	0.367088	0.861366	0.393875	0.585928	0.338704	0.706155	0.406323	0.62735	0.262232	0.710157	0.397657	0.571901	0.63154	0.611395	0.525134	0.625934	0.50497	0.440297	0.40512	0.660332	0.373363	0.644786	0.484684	0.774835	0.71507	0.763204	0.32556	0.669891	0.523223	0.948871	0.505335	0.815139	0.572518	0.762717	0.379016	0.800432	0.526575	0.889136	0.491022
O60496	DOK2	Docking protein 2	0.761869	1.40017	0.479999	1.17703	0.544156	1.24804	0.653339	1.19795	0.656055	1.32172	1.52829	2.75133	1.49035	5.62501	1.34411	3.07173	1.86445	2.80999	1.88121	1.46148	0.772082	1.40443	0.931532	1.13525	0.664009	1.94807	0.700845	2.04593	0.7223	1.36883	NA	NA	NA	NA	NA	NA	NA	NA	NA	NA	0.596718	1.08851	0.580652	1.64308	0.5558	1.20827	0.643731
O60499	STX10	Syntaxin-10	0.467313	0.716512	0.437683	0.85239	0.462585	0.708071	0.444793	0.729646	0.524	1.00625	0.676456	0.621024	0.499276	0.621516	0.506654	0.663119	0.739826	0.663081	0.652052	0.624539	1.05042	0.952531	1.62818	1.1394	1.29961	1.2637	1.30961	1.06828	1.27522	0.913053	2.87304	1.09745	2.65047	1.36914	1.9588	1.58628	2.71025	1.10206	1.8464	0.98902	0.569457	0.728329	0.347212	0.953629	0.323804	0.793001	0.477724
O60502	OGA	Protein O-GlcNAcase	0.378917	0.407299	0.263324	0.351062	0.319111	0.319723	0.264488	0.406926	0.282418	0.429189	0.200144	0.395535	0.190245	0.338758	0.183669	0.514245	0.247458	0.346302	0.231712	0.296101	0.274804	0.393183	0.255992	0.323308	0.242731	0.454466	0.217703	0.389244	0.21147	0.457052	0.34829	0.356481	0.32509	0.366849	0.216645	0.398404	0.37626	0.687029	0.294951	0.373715	0.283348	0.416884	0.263135	0.517743	0.242902	0.464443	0.297677
O60503	ADCY9	Adenylate cyclase type 9	1.06147	0.967505	0.926159	0.959095	1.12457	0.763331	1.30589	0.964158	1.08982	1.09004	NA	NA	NA	NA	NA	NA	NA	NA	NA	NA	NA	NA	NA	NA	NA	NA	NA	NA	NA	NA	NA	NA	NA	NA	NA	NA	NA	NA	NA	NA	NA	NA	NA	NA	NA	NA	NA
O60504	SORBS3	Vinexin	1.87147	1.38547	1.43359	1.06238	1.13517	0.935893	1.01625	0.902817	1.27486	1.1423	1.32712	1.17279	1.24498	0.791537	1.08942	1.06531	0.996135	1.34554	1.15856	0.924977	1.2527	1.00491	1.43735	1.10071	1.98631	0.943356	1.21152	1.12513	1.38305	1.1215	1.8077	1.05477	1.23705	1.24829	1.10592	1.85486	1.51289	1.00448	1.91956	1.50672	1.95086	1.29603	1.34114	1.01084	1.52949	1.23026	1.52806
O60506	SYNCRIP	Heterogeneous nuclear ribonucleoprotein Q	0.410162	0.91377	0.236017	0.856633	0.298273	0.499182	0.261032	0.65099	0.345947	0.847192	0.336638	0.740885	0.28264	0.592481	0.256527	0.721006	0.36286	0.752546	0.373941	0.89598	0.490671	0.778105	0.426154	0.8766	0.436506	0.697365	0.321782	0.684442	0.476757	0.650627	0.499334	0.789994	0.4395	0.680048	0.346702	0.552633	0.489732	0.928545	0.363135	0.974702	0.408991	0.664171	0.347604	0.864017	0.37704	0.892558	0.404076
O60507	TPST1	Protein-tyrosine sulfotransferase 1	0.588751	1.18162	0.532902	1.22609	0.435492	0.827319	0.724804	1.3757	1.21244	1.47586	NA	NA	NA	NA	NA	NA	NA	NA	NA	NA	NA	NA	NA	NA	NA	NA	NA	NA	NA	NA	1.83178	1.1218	1.89115	2.23856	0.852494	2.30386	2.8747	1.70429	1.44066	1.15815	1.47341	1.49048	1.01217	0.939248	1.24269	1.89713	1.62421
O60508	CDC40	Pre-mRNA-processing factor 17	0.44648	1.13652	0.424873	1.04774	0.470645	0.718676	0.530405	0.731971	0.662519	1.19012	1.1976	0.750249	0.487578	0.880915	0.581258	0.809247	0.785741	0.990349	0.637111	0.721108	0.597459	0.751597	0.744547	0.784176	0.518776	0.613356	0.529753	0.773409	0.563449	0.660454	0.716114	0.980804	0.399876	0.678444	0.564607	0.604995	0.649518	1.00647	0.53487	0.733728	0.459228	0.681079	0.413089	0.816964	0.390678	0.916869	0.498515
O60512	B4GALT3	Beta-1,4-galactosyltransferase 3	NA	NA	NA	NA	NA	NA	NA	NA	NA	NA	NA	NA	NA	NA	NA	NA	NA	NA	NA	NA	NA	NA	NA	NA	NA	NA	NA	NA	NA	NA	NA	NA	NA	NA	NA	NA	NA	NA	NA	NA	0.723651	1.04226	0.539922	1.00186	0.511965	1.02435	0.716587
O60518	RANBP6	Ran-binding protein 6	0.49864	0.902856	0.32865	0.720081	0.491404	0.511337	0.397116	0.562688	0.431851	0.825339	0.506715	0.547616	0.364809	0.447382	0.368351	0.543778	0.426192	0.680893	0.478263	0.748561	0.502454	0.525606	0.429864	0.607688	0.570047	0.575784	0.347575	0.744648	0.475517	0.53563	0.478078	0.527854	0.408071	0.795329	0.389598	0.583198	1.01328	0.70405	0.379224	0.649355	0.346943	0.438934	0.281876	0.581916	0.294628	0.509678	0.308384
O60522	TDRD6	Tudor domain-containing protein 6	NA	NA	NA	NA	NA	NA	NA	NA	NA	NA	0.176571	0.469035	0.294055	0.53857	0.259016	0.712939	0.283867	0.481552	0.311018	0.67586	0.577095	1.21267	0.39821	0.898554	0.331139	0.203107	0.379639	0.803028	0.393708	1.3447	0.354333	0.69438	0.308768	0.399525	0.287768	0.497039	0.380176	0.662088	0.290541	0.654846	NA	NA	NA	NA	NA	NA	NA
O60524	NEMF	Nuclear export mediator factor NEMF	0.318721	0.800044	0.265425	0.721085	0.267564	0.543166	0.261426	0.481208	0.293008	0.690719	0.33268	0.568886	0.288233	0.613717	0.326719	0.615371	0.380293	0.699374	0.383554	0.680175	0.404329	0.499313	0.37312	0.665383	0.295636	0.570034	0.232505	0.551178	0.281735	0.560037	0.48706	0.688331	0.446559	0.65295	0.347235	0.59024	0.436411	0.757519	0.459206	0.783429	0.355441	0.541612	0.368259	0.71747	0.313618	0.64157	0.376847
O60547	GMDS	GDP-mannose 4,6 dehydratase	0.712154	1.31697	0.549748	2.40453	0.651945	0.66096	0.670955	0.847469	0.643098	1.62935	0.930413	1.10892	0.737877	1.20407	0.69011	1.76262	0.831793	1.72218	0.868237	2.23418	1.11934	0.906795	0.900795	2.3979	0.669139	1.00091	0.695471	1.06793	0.661458	1.49497	0.971702	1.51734	0.931886	1.23195	0.570803	1.08274	1.0565	1.15205	0.758561	2.91249	0.687345	1.63468	0.573029	1.82103	0.612417	1.03563	0.678465
O60551	NMT2	Glycylpeptide N-tetradecanoyltransferase 2	1.1596	1.42531	0.72779	0.770862	0.823001	0.746838	0.715154	0.741312	0.728282	1.00836	0.461296	0.67004	0.563568	0.772088	0.428378	0.595631	0.758514	1.03333	0.898012	0.635196	0.875397	1.02092	0.859292	0.581603	1.3771	0.631656	0.910133	1.2522	1.09992	0.901669	0.947387	0.527091	0.805746	0.588783	0.525954	0.868164	1.15264	0.684381	0.758506	0.734837	1.02369	0.90234	0.596985	0.778195	0.658047	0.884523	0.632765
O60563	CCNT1	Cyclin-T1	NA	NA	NA	NA	NA	NA	NA	NA	NA	NA	NA	NA	NA	NA	NA	NA	NA	NA	NA	NA	0.331971	0.534053	0.428882	0.673246	0.559445	0.755127	0.38457	0.485572	0.430907	0.43451	0.510691	0.41941	0.466437	0.688211	0.39906	0.513157	0.43454	0.513818	0.385	0.547222	0.411445	0.380643	0.345018	0.586193	0.41606	0.544118	0.386329
O60566	BUB1B	Mitotic checkpoint serine/threonine-protein kinase BUB1 beta	0.126705	0.261725	0.108262	0.249596	0.125716	0.180052	0.093815	0.177884	0.115725	0.219698	0.176723	0.157053	0.149936	0.209378	0.115248	0.220649	0.161727	0.243988	0.171264	0.141537	0.125092	0.187296	0.137146	0.203051	0.159769	0.268629	0.14914	0.168889	0.185083	0.155209	0.123202	0.182592	0.105112	0.240164	0.114278	0.1867	0.113097	0.214787	0.0920827	0.162135	0.213515	0.166911	0.196861	0.2666	0.184326	0.538815	0.207257
O60568	PLOD3	Multifunctional procollagen lysine hydroxylase and glycosyltransferase LH3	0.683335	1.79611	0.520477	1.6431	0.60881	0.841177	0.633232	1.56722	0.719313	1.59362	0.843136	0.769879	0.736839	0.919447	0.688377	0.972773	0.880476	1.00068	0.764837	1.11525	0.632033	0.898	0.663016	1.04521	0.484952	0.809995	0.513248	1.1971	0.546386	1.10205	0.710609	0.96488	0.705019	1.12047	0.432734	0.78946	0.703439	0.855788	0.499161	1.34351	0.597088	0.722922	0.700817	0.972539	0.523112	1.10655	0.667557
O60573	EIF4E2	Eukaryotic translation initiation factor 4E type 2	0.175014	0.333323	0.150841	0.708563	0.184943	0.390226	0.128619	0.464381	0.163739	0.530313	0.280594	0.418661	0.244768	0.431517	0.220878	0.731663	0.263897	0.584142	0.321843	0.523125	0.501025	0.662314	0.382131	0.717576	0.495299	0.29657	0.397246	0.710195	0.476507	1.16031	0.338824	0.786377	0.243266	0.61528	0.337723	0.7089	0.470742	1.01416	0.279296	0.831259	0.22901	0.575585	0.227856	0.711064	0.315873	0.801583	0.32324
O60583	CCNT2	Cyclin-T2	NA	NA	NA	NA	NA	NA	NA	NA	NA	NA	NA	NA	NA	NA	NA	NA	NA	NA	NA	NA	NA	NA	NA	NA	NA	NA	NA	NA	NA	NA	NA	NA	NA	NA	NA	NA	NA	NA	NA	NA	NA	NA	NA	NA	NA	NA	NA
O60603	TLR2	Toll-like receptor 2	0.186257	0.472904	0.110041	0.312892	0.126061	0.352123	0.244734	0.967622	0.202038	0.410224	0.270927	0.64311	0.289998	0.573831	0.267569	0.509509	0.344115	0.605808	0.592508	0.456468	NA	NA	NA	NA	NA	NA	NA	NA	NA	NA	1.92073	3.76023	2.21792	3.95316	1.36142	4.73322	3.61054	2.5784	1.70424	3.56131	NA	NA	NA	NA	NA	NA	NA
O60610	DIAPH1	Protein diaphanous homolog 1	0.354579	0.733775	0.327049	1.45093	0.308501	0.542046	0.368528	0.888685	0.357583	0.824519	0.511339	1.26305	0.438296	0.80215	0.368898	0.914329	0.594912	0.801156	0.504492	0.986378	0.493694	1.01085	0.476579	1.02835	0.450026	0.986917	0.381061	0.762011	0.392433	0.894904	0.493919	0.722936	0.446479	1.20222	0.333589	0.86149	0.645371	1.06679	0.340696	0.748994	0.450619	1.0156	0.410612	1.14513	0.491043	0.996415	0.582002
O60613	SELENOF	Selenoprotein F	0.940299	3.85035	1.32931	2.27929	0.342141	3.51646	0.851006	1.54052	0.949354	1.28941	0.832097	0.917965	0.508116	1.62439	0.575808	1.39367	0.830509	1.66288	0.721348	1.31238	1.30509	2.83132	1.08838	2.28595	0.828001	1.08652	0.815769	2.46237	0.81653	1.76401	0.863634	1.47614	1.09321	2.36886	0.780387	1.78371	1.53407	2.46995	0.682424	2.60696	0.572676	2.17487	0.526814	2.37476	0.512125	1.08553	0.87542
O60635	TSPAN1	Tetraspanin-1	NA	NA	NA	NA	NA	NA	NA	NA	NA	NA	NA	NA	NA	NA	NA	NA	NA	NA	NA	NA	NA	NA	NA	NA	NA	NA	NA	NA	NA	NA	NA	NA	NA	NA	NA	NA	NA	NA	NA	NA	NA	NA	NA	NA	NA	NA	NA
O60636	TSPAN2	Tetraspanin-2	NA	NA	NA	NA	NA	NA	NA	NA	NA	NA	NA	NA	NA	NA	NA	NA	NA	NA	NA	NA	NA	NA	NA	NA	NA	NA	NA	NA	NA	NA	NA	NA	NA	NA	NA	NA	NA	NA	NA	NA	NA	NA	NA	NA	NA	NA	NA
O60637	TSPAN3	Tetraspanin-3	0.210222	0.594604	0.182043	0.368738	0.391415	0.30781	0.216446	0.383463	0.267351	0.312288	0.195676	0.263933	0.158517	0.313892	0.199762	0.435332	0.185306	0.610341	0.269601	0.428044	0.276969	0.296852	0.228337	0.651632	0.351353	0.415327	0.127063	0.288896	0.256568	0.39275	0.213733	0.535118	0.279912	0.425387	0.20791	0.329589	0.279276	0.596204	0.156849	0.584531	0.278465	0.291329	0.160781	0.336029	0.16388	0.358946	0.1446
O60641	SNAP91	Clathrin coat assembly protein AP180	0.685235	1.26321	0.456472	1.25565	0.648398	0.817616	0.799988	1.06738	0.773778	0.96273	0.392613	0.73253	0.329666	0.635507	0.313115	0.621276	0.438865	0.592194	0.460857	0.78068	0.583641	0.75561	0.576661	0.886976	0.546603	0.881015	0.416537	0.77683	0.469572	0.818707	0.693317	0.672849	0.638123	0.97413	0.39638	0.671596	0.634781	0.933723	0.485519	1.03712	0.729094	0.87072	0.698608	0.881848	0.669482	0.918489	0.671736
O60645	EXOC3	Exocyst complex component 3	0.74555	0.968822	0.601187	0.950512	0.774442	0.851461	0.710782	1.00879	0.801935	0.991705	0.626494	0.913661	0.551074	0.717032	0.561574	1.10978	0.675075	0.919162	0.861679	1.11202	0.708486	1.00939	0.689543	1.23662	0.793193	0.989004	0.677345	0.927214	0.744278	0.870722	1.1248	0.684083	0.803314	1.20643	1.19326	1.24014	0.907009	1.19365	1.66826	1.4601	0.6205	0.870921	0.583868	1.12264	0.616693	0.917315	0.821037
O60658	PDE8A	High affinity cAMP-specific and IBMX-insensitive 3',5'-cyclic phosphodiesterase 8A	NA	NA	NA	NA	NA	NA	NA	NA	NA	NA	0.596987	0.661607	0.518639	0.610279	0.524319	1.0869	0.560032	0.89647	0.617891	0.570519	NA	NA	NA	NA	NA	NA	NA	NA	NA	NA	0.833257	0.795483	0.903768	0.891168	0.544146	0.944055	0.612405	0.838386	0.756824	0.752242	NA	NA	NA	NA	NA	NA	NA
O60664	PLIN3	Perilipin-3	0.453109	0.433678	0.440793	0.56342	0.328061	0.578952	0.37935	0.747094	0.648545	0.661055	0.431158	1.09648	0.38463	0.707782	0.491901	1.18614	0.711429	0.741943	0.530074	1.0765	0.633674	0.784345	0.646965	1.00339	0.536422	0.873291	0.380089	0.664601	0.425399	1.12083	0.631759	0.590751	0.769901	1.7106	0.428835	1.0896	0.768253	1.59469	0.570006	1.53339	0.641094	0.94308	0.640881	1.41892	0.637654	1.04628	0.71329
O60669	SLC16A7	Monocarboxylate transporter 2	NA	NA	NA	NA	NA	NA	NA	NA	NA	NA	NA	NA	NA	NA	NA	NA	NA	NA	NA	NA	NA	NA	NA	NA	NA	NA	NA	NA	NA	NA	0.840072	0.616036	0.935974	0.870808	0.81482	1.29569	0.737788	1.17725	0.763203	0.73491	0.190704	0.504552	0.436975	0.27765	0.373248	0.286085	0.301754
O60671	RAD1	Cell cycle checkpoint protein RAD1	NA	NA	NA	NA	NA	NA	NA	NA	NA	NA	0.463152	0.958846	0.328681	0.735388	0.337479	0.798351	0.427686	0.953526	0.338492	0.628552	0.420062	0.841361	0.449799	1.01632	0.381238	0.678051	0.42036	0.799675	0.501007	0.840605	NA	NA	NA	NA	NA	NA	NA	NA	NA	NA	0.483527	0.687084	0.527439	1.10158	0.369365	0.904724	0.558722
O60674	JAK2	Tyrosine-protein kinase JAK2	NA	NA	NA	NA	NA	NA	NA	NA	NA	NA	NA	NA	NA	NA	NA	NA	NA	NA	NA	NA	1.12258	1.43123	1.02988	1.22332	1.05918	1.17445	0.762638	1.67549	1.1002	1.1119	NA	NA	NA	NA	NA	NA	NA	NA	NA	NA	1.16	1.61471	1.13403	1.98645	1.23358	1.52777	1.18947
O60678	PRMT3	Protein arginine N-methyltransferase 3	0.319778	0.737606	0.255138	0.720384	0.279249	0.371191	0.297848	0.734047	0.353372	0.84289	0.283413	0.631257	0.269034	0.49512	0.197375	0.556106	0.384013	0.565329	0.30138	0.616184	0.404796	0.835726	0.283468	0.529849	0.305298	0.61967	0.211693	0.593452	0.20762	0.955353	0.413503	0.496265	0.331205	0.72568	0.274647	0.486997	0.423219	0.871429	0.271351	0.568176	0.273578	0.421978	0.257367	0.563591	0.266712	0.639785	0.33097
O60684	KPNA6	Importin subunit alpha-7	0.344836	0.498897	0.225379	0.522546	0.293065	0.422755	0.274064	0.457027	0.345304	0.519245	0.241069	0.322235	0.200993	0.298656	0.221761	0.399387	0.235826	0.284524	0.217445	0.425844	0.35663	0.493145	0.372269	0.580734	0.335207	0.46579	0.300417	0.470251	0.39567	0.50643	0.461911	0.740654	0.41219	0.665476	0.476898	0.62479	0.475193	0.731131	0.535952	0.664935	0.310147	0.462455	0.287152	0.512915	0.302823	0.693849	0.380729
O60687	SRPX2	Sushi repeat-containing protein SRPX2	NA	NA	NA	NA	NA	NA	NA	NA	NA	NA	NA	NA	NA	NA	NA	NA	NA	NA	NA	NA	NA	NA	NA	NA	NA	NA	NA	NA	NA	NA	NA	NA	NA	NA	NA	NA	NA	NA	NA	NA	NA	NA	NA	NA	NA	NA	NA
O60701	UGDH	UDP-glucose 6-dehydrogenase	0.473927	0.531674	0.309049	0.373821	0.368838	0.337187	0.347064	0.312124	0.46662	1.45046	0.524523	0.455148	0.369552	0.372637	0.381293	0.556907	0.522588	0.778375	0.428532	0.650226	0.913941	0.649122	0.743475	0.652197	0.472364	0.688384	0.508285	0.614824	0.539499	0.863671	0.714532	0.526013	0.809865	0.759087	0.537271	0.636596	0.688391	0.669499	0.568242	1.92691	0.576491	0.582523	0.532932	0.519866	0.635439	0.791178	0.665998
O60704	TPST2	Protein-tyrosine sulfotransferase 2	1.00582	2.65661	0.798873	1.61949	0.862667	1.09463	0.927955	2.57728	0.912409	1.34881	0.915272	1.66222	1.08191	2.0898	1.07873	2.46006	1.45849	1.78379	1.0689	1.46254	0.785773	1.29751	1.1029	0.916531	0.932372	0.895113	0.820002	1.36961	0.762722	0.957377	1.05032	0.923698	0.927856	1.86477	0.517256	1.58555	1.24174	1.95444	0.806071	2.1958	NA	NA	NA	NA	NA	NA	NA
O60706	ABCC9	ATP-binding cassette sub-family C member 9	4.72457	1.23116	1.76513	1.0373	7.08224	1.40852	1.85024	1.31405	2.23862	2.09581	NA	NA	NA	NA	NA	NA	NA	NA	NA	NA	NA	NA	NA	NA	NA	NA	NA	NA	NA	NA	NA	NA	NA	NA	NA	NA	NA	NA	NA	NA	NA	NA	NA	NA	NA	NA	NA
O60711	LPXN	Leupaxin	NA	NA	NA	NA	NA	NA	NA	NA	NA	NA	2.62385	6.8859	2.70762	18.794	2.15671	11.6465	3.34726	8.62633	4.36604	2.65914	2.04406	5.99228	2.34038	3.96191	1.25234	3.62464	1.62555	11.9173	1.37075	6.28867	3.58242	10.6344	3.09805	3.94698	1.75754	10.6073	6.57437	15.1012	1.11376	3.38009	NA	NA	NA	NA	NA	NA	NA
O60716	CTNND1	Catenin delta-1	0.582461	2.08851	0.50674	1.08641	0.477726	0.821036	0.417524	1.04249	0.513022	1.21203	0.632913	1.69963	0.600836	1.04778	0.575251	1.55891	0.693195	1.70171	0.726351	2.00266	2.02349	1.58005	2.17746	2.06502	1.53519	1.45999	1.72772	1.13031	0.944089	1.05574	0.536318	1.39645	0.756292	3.03011	0.46091	1.75917	0.556855	2.29646	0.512565	1.64234	0.487205	1.21259	0.460972	1.82975	0.562937	1.27145	0.543898
O60725	ICMT	Protein-S-isoprenylcysteine O-methyltransferase	0.974458	2.34117	0.339014	2.29551	1.84795	1.69334	0.797061	1.03015	1.02052	1.93596	NA	NA	NA	NA	NA	NA	NA	NA	NA	NA	0.86908	2.08066	0.851742	2.34979	0.995532	1.51535	0.626069	1.33845	1.08093	1.46567	1.12377	1.63353	1.03284	1.23432	0.604747	0.724457	0.972467	1.7128	0.540728	1.22256	1.11277	1.28407	1.17952	0.845696	0.786628	1.20405	0.704133
O60739	EIF1B	Eukaryotic translation initiation factor 1b	0.0644836	0.131252	0.0874204	0.108132	0.0381568	0.058296	0.0373478	0.0649133	0.0545444	0.0364084	NA	NA	NA	NA	NA	NA	NA	NA	NA	NA	NA	NA	NA	NA	NA	NA	NA	NA	NA	NA	NA	NA	NA	NA	NA	NA	NA	NA	NA	NA	NA	NA	NA	NA	NA	NA	NA
O60749	SNX2	Sorting nexin-2	0.686309	0.626151	0.462313	0.651486	0.425656	0.553627	0.388423	0.60439	0.536697	0.644874	0.476972	0.896472	0.522854	0.844429	0.50513	0.929201	0.480189	0.832257	0.621103	0.703577	0.950034	1.34648	0.967619	1.30991	1.06523	0.870416	0.841873	1.31238	0.666632	1.14799	0.741553	0.567388	0.741075	1.19316	0.608994	1.12061	0.894083	1.39695	0.687734	1.37264	0.908311	1.01772	0.768525	1.3121	0.825584	1.04864	0.86194
O60760	HPGDS	Hematopoietic prostaglandin D synthase	1.98946	1.04893	2.5188	1.51278	1.83956	1.75406	3.13779	1.80762	3.05462	1.86535	1.38309	1.15729	0.93456	1.28776	0.888703	1.04593	0.847167	1.90243	1.01296	0.904244	3.50771	3.42084	3.21567	3.27466	2.60693	1.04718	4.22059	3.37874	3.47693	4.79691	4.80321	5.84385	1.31072	0.931754	2.67463	2.3175	3.2508	3.8492	3.2006	1.60423	NA	NA	NA	NA	NA	NA	NA
O60762	DPM1	Dolichol-phosphate mannosyltransferase subunit 1	0.411399	0.839434	0.287815	1.05874	0.466296	0.912143	0.455651	0.785492	0.512371	1.21409	0.40609	0.589076	0.334842	0.862492	0.328007	0.780867	0.466069	1.11177	0.529959	0.830993	0.522304	0.643672	0.470256	1.14146	0.48519	0.662645	0.326035	0.785608	0.402849	0.616603	0.307621	0.697032	0.31352	0.717177	0.266391	0.714572	0.347329	0.808319	0.262594	1.15465	0.246998	0.64077	0.284968	0.887958	0.299523	0.537671	0.316137
O60763	USO1	General vesicular transport factor p115	0.491942	0.667853	0.340045	0.65793	0.347286	0.519419	0.481939	0.736858	0.517715	0.849812	0.439023	0.636364	0.345439	0.738783	0.366924	1.00496	0.532234	0.767558	0.464798	0.708142	0.621325	0.861108	0.542671	0.872572	0.41459	0.79413	0.373315	0.843594	0.404835	0.749443	0.565736	0.578797	0.502542	0.812216	0.345479	0.744619	0.648201	0.937588	0.409237	1.61028	0.42092	0.757153	0.419271	1.02362	0.440092	0.848561	0.520904
O60783	MRPS14	28S ribosomal protein S14, mitochondrial	NA	NA	NA	NA	NA	NA	NA	NA	NA	NA	NA	NA	NA	NA	NA	NA	NA	NA	NA	NA	NA	NA	NA	NA	NA	NA	NA	NA	NA	NA	NA	NA	NA	NA	NA	NA	NA	NA	NA	NA	NA	NA	NA	NA	NA	NA	NA
O60784	TOM1	Target of Myb protein 1	0.972959	2.10632	1.22591	1.1637	0.85591	1.41278	0.876349	1.66294	1.33115	1.38892	0.601312	1.07795	0.468837	1.17373	0.534877	1.21169	0.731683	0.882481	0.68991	0.996286	1.53543	1.55923	1.34707	1.70149	1.17144	1.46948	0.688336	1.40661	0.729733	1.76404	1.11787	1.2847	1.36386	1.94559	0.795273	1.93244	1.15628	2.18004	1.12253	2.76425	0.931448	1.00145	0.966892	1.28508	0.884807	1.26591	1.29861
O60810	PRAMEF4	PRAME family member 4	0.700531	0.756659	2.27399	4.78599	0.593499	1.40662	0.551425	1.28532	0.700611	1.92698	0.971448	1.32752	0.96713	2.31955	0.599166	2.26099	0.693088	1.63088	1.02608	3.09972	1.73931	2.06539	2.21554	3.01169	1.6243	1.99333	1.23394	2.03899	1.52585	1.82125	1.81245	3.63647	1.5512	2.22989	1.09842	1.88385	1.6577	3.12351	1.23495	3.16657	1.34573	1.80856	1.19896	2.57258	1.1865	2.44982	1.37614
O60812	HNRNPCL1	Heterogeneous nuclear ribonucleoprotein C-like 1	NA	NA	NA	NA	NA	NA	NA	NA	NA	NA	NA	NA	NA	NA	NA	NA	NA	NA	NA	NA	NA	NA	NA	NA	NA	NA	NA	NA	NA	NA	NA	NA	NA	NA	NA	NA	NA	NA	NA	NA	NA	NA	NA	NA	NA	NA	NA
O60813	PRAMEF11	PRAME family member 11	0.700531	0.756659	2.27399	4.78599	0.593499	1.40662	0.551425	1.28532	0.700611	1.92698	0.971448	1.32752	0.96713	2.31955	0.599166	2.26099	0.693088	1.63088	1.02608	3.09972	1.73931	2.06539	2.21554	3.01169	1.6243	1.99333	1.23394	2.03899	1.52585	1.82125	1.81245	3.63647	1.5512	2.22989	1.09842	1.88385	1.6577	3.12351	1.23495	3.16657	1.34573	1.80856	1.19896	2.57258	1.1865	2.44982	1.37614
O60825	PFKFB2	6-phosphofructo-2-kinase/fructose-2,6-bisphosphatase 2	0.338415	0.730065	0.252999	0.543698	0.271449	0.852581	0.301137	0.533016	0.312354	0.702157	0.357118	0.568477	0.259937	0.68622	0.292655	0.535777	0.373224	0.630449	0.381441	0.504071	0.693792	0.846896	0.615934	1.11006	0.506672	0.832245	0.487743	0.889687	0.486039	0.913439	0.625846	0.868951	0.621345	0.742897	0.434541	0.773129	0.672807	1.14164	0.505282	3.79904	0.451402	0.651753	0.391773	1.03648	0.375171	0.810932	0.464966
O60826	CCDC22	Coiled-coil domain-containing protein 22	1.17512	1.35862	0.846769	1.29654	0.989615	0.971962	1.10585	1.49027	1.05177	1.37654	1.04767	1.11009	0.881905	1.27779	0.815866	1.24036	1.16082	1.39498	0.999441	1.40875	0.98398	1.50435	0.948369	1.5264	0.917221	1.18609	0.756794	1.5098	0.746798	1.07542	1.07316	1.01298	1.04814	1.69779	0.66629	1.18023	1.11833	1.43464	0.827983	1.75405	0.972679	1.38472	0.835105	1.56087	0.957819	1.12769	1.0719
O60828	PQBP1	Polyglutamine-binding protein 1	NA	NA	NA	NA	NA	NA	NA	NA	NA	NA	0.135879	0.212386	0.12161	0.223507	0.103493	0.383418	0.15262	0.211126	0.16511	0.323447	NA	NA	NA	NA	NA	NA	NA	NA	NA	NA	NA	NA	NA	NA	NA	NA	NA	NA	NA	NA	NA	NA	NA	NA	NA	NA	NA
O60830	TIMM17B	Mitochondrial import inner membrane translocase subunit Tim17-B	0.40185	0.824617	0.249985	0.923861	0.3774	0.531159	0.544543	0.479502	0.667866	0.985673	NA	NA	NA	NA	NA	NA	NA	NA	NA	NA	0.868589	0.833134	0.805372	1.25183	0.698787	0.8487	0.724625	1.03225	0.603466	1.10695	0.673048	0.742837	0.629825	0.647698	0.457247	0.841575	0.790963	1.02292	0.541415	0.809184	0.886957	0.645431	0.665668	0.832983	0.743421	1.38526	0.956406
O60831	PRAF2	PRA1 family protein 2	0.579331	1.16309	0.408248	0.62022	0.695545	0.732475	0.623282	0.586175	0.623964	0.826382	0.673265	0.537622	0.473582	0.57233	0.687671	0.795365	0.520238	0.875997	0.553835	0.566539	0.639198	0.542093	0.512019	0.615068	0.507743	0.551066	0.504496	0.606775	0.634335	0.583306	0.501298	0.57273	0.438294	0.525329	0.326736	0.632312	0.45911	0.46934	0.439502	1.26935	0.519599	0.553927	0.485449	0.555666	0.45812	0.650902	0.549357
O60832	DKC1	H/ACA ribonucleoprotein complex subunit DKC1	0.248051	0.661014	0.22557	0.699306	0.260456	0.352201	0.245503	0.399979	0.243534	0.760508	0.328223	0.388299	0.252554	0.388099	0.279415	0.607608	0.367913	0.591275	0.317685	0.801998	0.377804	0.772411	0.300894	0.651477	0.370595	0.520965	0.262774	0.450989	0.338088	0.556236	0.209545	0.247357	0.186078	0.537587	0.173057	0.294903	0.23285	0.286069	0.178793	0.537749	0.347083	0.474006	0.335905	0.550958	0.24223	0.417547	0.271665
O60841	EIF5B	Eukaryotic translation initiation factor 5B	0.237101	0.531878	0.177975	0.550618	0.222281	0.282249	0.229748	0.393481	0.257185	0.491683	0.203885	0.292504	0.161999	0.268355	0.174778	0.394147	0.224711	0.29775	0.215325	0.38634	0.204691	0.291764	0.194919	0.391291	0.17348	0.5236	0.147437	0.25032	0.16145	0.237884	0.292391	0.338687	0.222907	0.503504	0.184722	0.308718	0.288507	0.436716	0.204624	0.488024	0.183568	0.260173	0.184472	0.368155	0.162837	0.315801	0.189516
O60861	GAS7	Growth arrest-specific protein 7	NA	NA	NA	NA	NA	NA	NA	NA	NA	NA	NA	NA	NA	NA	NA	NA	NA	NA	NA	NA	NA	NA	NA	NA	NA	NA	NA	NA	NA	NA	1.31403	1.31915	1.04118	1.24324	1.27984	1.96768	1.66596	1.6024	1.82951	1.8261	NA	NA	NA	NA	NA	NA	NA
O60869	EDF1	Endothelial differentiation-related factor 1	0.106935	0.159813	0.105331	0.241758	0.161576	0.183729	0.125978	0.217814	0.132122	0.208223	0.142823	0.125932	0.0899671	0.183048	0.116149	0.237064	0.0994942	0.225115	0.115991	0.161701	0.134695	0.124031	0.149699	0.162825	0.125263	0.270514	0.0966082	0.18045	0.124666	0.142756	NA	NA	NA	NA	NA	NA	NA	NA	NA	NA	0.099125	0.149237	0.0660298	0.234931	0.125912	0.210193	0.116086
O60870	KIN	DNA/RNA-binding protein KIN17	NA	NA	NA	NA	NA	NA	NA	NA	NA	NA	0.2539	0.605743	0.282277	0.538446	0.260401	0.472361	0.385252	0.991064	0.40354	0.388889	0.424428	0.651188	0.421745	0.83661	0.479292	0.699161	0.490715	0.900392	0.460121	0.547394	0.651112	0.869723	0.641819	0.811468	0.568092	0.622294	0.746095	0.897281	0.548072	0.614088	NA	NA	NA	NA	NA	NA	NA
O60879	DIAPH2	Protein diaphanous homolog 2	0.683049	0.432097	0.650401	0.441144	0.432502	0.522751	0.512841	0.575221	0.651157	0.543842	0.978195	0.927229	0.933888	0.534533	0.740977	1.00956	0.8616	0.683083	0.935929	0.949356	0.731421	0.916037	0.816268	0.578661	0.730566	0.776416	0.767217	0.642518	0.689121	0.585122	0.702271	0.412326	0.622214	0.450623	0.883494	0.886075	0.713204	0.68735	0.700214	0.862971	0.617541	0.686544	0.574325	0.645377	0.873356	0.728984	0.813804
O60880	SH2D1A	SH2 domain-containing protein 1A	NA	NA	NA	NA	NA	NA	NA	NA	NA	NA	NA	NA	NA	NA	NA	NA	NA	NA	NA	NA	NA	NA	NA	NA	NA	NA	NA	NA	NA	NA	NA	NA	NA	NA	NA	NA	NA	NA	NA	NA	NA	NA	NA	NA	NA	NA	NA
O60884	DNAJA2	DnaJ homolog subfamily A member 2	0.483645	1.17515	0.344306	1.0804	0.596608	0.692661	0.507127	0.588539	0.504663	1.48017	0.378415	0.644903	0.314348	0.675197	0.350477	0.559123	0.389796	0.826835	0.402844	0.740211	0.476292	0.79458	0.461477	0.855695	0.533071	0.952396	0.475522	0.893087	0.611241	0.936214	0.486746	0.857018	0.489826	0.823982	0.424269	0.684572	0.616388	0.864013	0.430479	1.08584	0.542924	0.781861	0.630614	0.943041	0.650098	0.865613	0.558599
O60885	BRD4	Bromodomain-containing protein 4	0.281086	0.91542	0.299913	0.525529	0.271182	0.379305	0.263916	0.313522	0.254173	0.854359	0.5329	1.0654	0.482362	0.857286	0.48273	1.08833	0.564328	1.25889	0.616641	0.952038	0.601611	0.783383	0.643637	0.919447	0.716949	1.05171	0.403813	0.872081	0.57438	0.772401	0.576668	0.638268	0.513479	1.61023	0.378095	0.89677	0.610718	1.34368	0.511971	0.991625	0.475719	0.757513	0.437509	1.0561	0.481769	0.934553	0.473388
O60888	CUTA	Protein CutA	0.638248	0.366707	0.472405	0.638636	0.571907	0.420137	0.570804	0.418007	0.484658	0.791877	0.449473	0.511554	0.297578	0.450076	0.355122	0.584406	0.41108	0.529521	0.447372	0.478993	0.76661	0.724105	0.598544	0.512496	0.698035	0.740441	0.589289	0.584422	0.779316	0.605725	0.581789	0.417818	0.508594	0.713632	0.407528	0.616614	0.55401	0.576165	0.47881	0.917883	0.593955	0.629411	0.425829	0.621116	0.510305	0.767407	0.567926
O60890	OPHN1	Oligophrenin-1	NA	NA	NA	NA	NA	NA	NA	NA	NA	NA	2.5444	1.44154	2.37117	1.54958	2.01539	1.52125	2.04974	2.35418	2.51718	1.59241	1.26677	1.34035	1.40031	1.52495	1.65172	1.42906	1.75406	1.53657	2.26754	1.17666	1.62383	1.04105	0.892024	1.27008	1.3707	1.2929	1.46261	1.10908	1.36916	1.03878	1.17336	1.61694	0.805634	1.68924	0.898951	1.2803	1.08568
O60906	SMPD2	Sphingomyelin phosphodiesterase 2	NA	NA	NA	NA	NA	NA	NA	NA	NA	NA	NA	NA	NA	NA	NA	NA	NA	NA	NA	NA	NA	NA	NA	NA	NA	NA	NA	NA	NA	NA	NA	NA	NA	NA	NA	NA	NA	NA	NA	NA	NA	NA	NA	NA	NA	NA	NA
O60907	TBL1X	F-box-like/WD repeat-containing protein TBL1X	NA	NA	NA	NA	NA	NA	NA	NA	NA	NA	0.487919	0.575034	0.373526	0.550903	0.452106	0.648932	0.40871	1.01619	0.564043	0.383289	0.472649	0.362671	0.50913	0.480313	0.567937	0.423578	0.456852	0.417517	0.686334	0.582639	NA	NA	NA	NA	NA	NA	NA	NA	NA	NA	NA	NA	NA	NA	NA	NA	NA
O60911	CTSV	Cathepsin L2	0.681658	4.41908	0.695845	1.33716	0.580616	1.14653	1.1653	4.3332	1.22675	1.04116	NA	NA	NA	NA	NA	NA	NA	NA	NA	NA	1.38959	1.04553	0.87671	1.14688	0.600409	1.11578	0.603465	0.798988	0.458433	1.00109	NA	NA	NA	NA	NA	NA	NA	NA	NA	NA	NA	NA	NA	NA	NA	NA	NA
O60921	HUS1	Checkpoint protein HUS1	NA	NA	NA	NA	NA	NA	NA	NA	NA	NA	NA	NA	NA	NA	NA	NA	NA	NA	NA	NA	NA	NA	NA	NA	NA	NA	NA	NA	NA	NA	0.353834	0.925125	0.387507	0.942833	0.350084	0.732292	0.321194	1.14828	0.430396	0.82104	0.386722	0.850885	0.276664	1.40454	0.369175	1.07383	0.479433
O60925	PFDN1	Prefoldin subunit 1	NA	NA	NA	NA	NA	NA	NA	NA	NA	NA	NA	NA	NA	NA	NA	NA	NA	NA	NA	NA	NA	NA	NA	NA	NA	NA	NA	NA	NA	NA	NA	NA	NA	NA	NA	NA	NA	NA	NA	NA	0.446619	0.504835	0.372022	0.504543	0.36363	0.594447	0.442989
O60927	PPP1R11	E3 ubiquitin-protein ligase PPP1R11	0.874578	0.795743	0.724747	1.54076	1.30852	0.992543	1.28003	1.2743	1.30514	1.81193	NA	NA	NA	NA	NA	NA	NA	NA	NA	NA	NA	NA	NA	NA	NA	NA	NA	NA	NA	NA	NA	NA	NA	NA	NA	NA	NA	NA	NA	NA	0.892491	1.01422	0.694	1.86123	0.924404	1.82498	0.768809
O60934	NBN	Nibrin	0.963901	1.45941	1.05216	1.21535	0.737841	0.840888	0.886023	0.764664	0.869244	1.16832	0.909367	1.45401	0.7627	1.35949	0.795387	1.40463	0.828852	1.54627	0.907811	1.15318	0.836098	1.39338	0.889176	1.34209	0.978744	1.40509	0.733475	1.28618	0.880299	1.33278	0.560716	0.736594	0.539149	0.882406	0.476089	0.73466	0.567983	1.11311	0.649681	1.19161	0.742452	1.14528	0.614077	1.55441	0.570108	1.22985	0.641185
O60936	NOL3	Nucleolar protein 3	NA	NA	NA	NA	NA	NA	NA	NA	NA	NA	0.937429	1.43111	0.682691	1.19974	0.763652	1.12003	0.783434	1.12363	0.699035	1.93511	0.668271	1.1373	0.567139	1.16016	0.728398	1.24414	0.62332	0.989258	0.810107	1.90342	1.22116	2.18623	1.06227	1.44854	0.979651	1.34004	1.04378	1.19364	1.01785	1.68013	NA	NA	NA	NA	NA	NA	NA
O60941	DTNB	Dystrobrevin beta	NA	NA	NA	NA	NA	NA	NA	NA	NA	NA	0.594642	0.656487	0.640106	0.636238	0.464887	1.11796	0.691946	1.13162	0.852695	1.93861	NA	NA	NA	NA	NA	NA	NA	NA	NA	NA	NA	NA	NA	NA	NA	NA	NA	NA	NA	NA	NA	NA	NA	NA	NA	NA	NA
O60942	RNGTT	mRNA-capping enzyme	0.239672	0.789343	0.149477	0.543028	0.305132	0.445615	0.1924	0.232585	0.190453	0.535104	0.187996	0.532504	0.172351	0.401891	0.180156	0.521629	0.251042	0.544855	0.260385	0.408637	0.229894	0.520892	0.272467	0.512845	0.287955	0.427589	0.190352	0.47522	0.215652	0.400697	0.29066	0.413685	0.236415	0.524124	0.210489	0.356742	0.28152	0.524351	0.157883	0.417312	0.222803	0.430923	0.18741	0.373732	0.18598	0.512172	0.213792
O75015	FCGR3B	Low affinity immunoglobulin gamma Fc region receptor III-B	NA	NA	NA	NA	NA	NA	NA	NA	NA	NA	NA	NA	NA	NA	NA	NA	NA	NA	NA	NA	NA	NA	NA	NA	NA	NA	NA	NA	NA	NA	NA	NA	NA	NA	NA	NA	NA	NA	NA	NA	NA	NA	NA	NA	NA	NA	NA
O75023	LILRB5	Leukocyte immunoglobulin-like receptor subfamily B member 5	NA	NA	NA	NA	NA	NA	NA	NA	NA	NA	NA	NA	NA	NA	NA	NA	NA	NA	NA	NA	NA	NA	NA	NA	NA	NA	NA	NA	NA	NA	NA	NA	NA	NA	NA	NA	NA	NA	NA	NA	NA	NA	NA	NA	NA	NA	NA
O75027	ABCB7	ATP-binding cassette sub-family B member 7, mitochondrial	0.572071	0.967918	0.265169	0.779151	0.620694	0.661229	0.459466	0.851631	0.514223	0.820776	0.742374	0.691684	0.450392	0.773481	0.428802	1.03565	0.596889	1.2861	0.577305	0.692802	0.508035	0.673316	0.484408	0.773115	0.586908	0.635687	0.36832	0.642503	0.445582	0.635578	0.590019	0.816623	0.528561	0.614243	0.444505	0.747175	0.626512	0.958999	0.444191	0.928698	0.492663	0.737974	0.535863	0.766822	0.422763	0.653651	0.432749
O75030	MITF	Microphthalmia-associated transcription factor	0.950335	1.29204	0.410799	0.78353	0.588297	0.920815	0.384329	0.664997	0.72833	0.807817	NA	NA	NA	NA	NA	NA	NA	NA	NA	NA	NA	NA	NA	NA	NA	NA	NA	NA	NA	NA	NA	NA	NA	NA	NA	NA	NA	NA	NA	NA	NA	NA	NA	NA	NA	NA	NA
O75031	HSF2BP	Heat shock factor 2-binding protein	NA	NA	NA	NA	NA	NA	NA	NA	NA	NA	NA	NA	NA	NA	NA	NA	NA	NA	NA	NA	2.05306	1.10994	9.03616	1.35976	4.53801	5.11771	7.04212	7.18118	3.4874	1.01135	NA	NA	NA	NA	NA	NA	NA	NA	NA	NA	NA	NA	NA	NA	NA	NA	NA
O75037	KIF21B	Kinesin-like protein KIF21B	NA	NA	NA	NA	NA	NA	NA	NA	NA	NA	NA	NA	NA	NA	NA	NA	NA	NA	NA	NA	0.135757	0.850178	0.391416	0.927668	0.769964	0.186142	0.113483	0.397445	0.50931	0.665602	NA	NA	NA	NA	NA	NA	NA	NA	NA	NA	NA	NA	NA	NA	NA	NA	NA
O75038	PLCH2	1-phosphatidylinositol 4,5-bisphosphate phosphodiesterase eta-2	NA	NA	NA	NA	NA	NA	NA	NA	NA	NA	1.63326	2.67329	1.48278	1.53808	1.66153	1.96232	2.37027	2.60611	1.96202	5.40895	NA	NA	NA	NA	NA	NA	NA	NA	NA	NA	NA	NA	NA	NA	NA	NA	NA	NA	NA	NA	0.631253	1.19447	0.673874	1.71319	1.26843	1.56628	0.922331
O75044	SRGAP2	SLIT-ROBO Rho GTPase-activating protein 2	0.559322	1.22358	0.390453	0.664002	0.338127	0.679212	0.42308	0.634205	0.446181	0.734809	0.503156	1.01572	0.397682	0.760167	0.40671	0.777191	0.503998	0.912927	0.467921	0.636061	0.689109	0.623682	0.815947	0.757952	0.734998	1.17014	0.54987	0.867239	0.59021	0.808784	0.747127	0.500768	0.657039	0.865844	0.463757	0.845612	0.80712	1.16539	0.53515	1.02524	0.682044	0.721292	0.691497	1.27314	0.546262	0.703533	0.584645
O75051	PLXNA2	Plexin-A2	1.23447	1.5584	0.908517	1.07239	1.73205	1.54858	0.706783	1.1849	1.82169	2.38963	1.3503	2.40338	0.977143	2.85258	1.16466	2.32039	1.07154	2.41749	1.41431	3.48257	1.26478	2.80453	1.82111	2.8853	2.92588	2.15579	1.54204	1.83304	1.96715	2.13288	1.07812	1.58259	1.03581	1.71804	0.980198	1.17402	1.2253	2.40541	2.17921	2.15999	0.720814	0.952854	0.787543	1.53655	0.90473	1.11179	0.699117
O75052	NOS1AP	Carboxyl-terminal PDZ ligand of neuronal nitric oxide synthase protein	NA	NA	NA	NA	NA	NA	NA	NA	NA	NA	NA	NA	NA	NA	NA	NA	NA	NA	NA	NA	NA	NA	NA	NA	NA	NA	NA	NA	NA	NA	NA	NA	NA	NA	NA	NA	NA	NA	NA	NA	NA	NA	NA	NA	NA	NA	NA
O75054	IGSF3	Immunoglobulin superfamily member 3	0.636998	1.33607	0.576742	1.06038	0.701792	1.8453	0.81268	3.07762	1.05282	1.75458	0.823676	1.70477	0.560954	0.890308	0.68475	1.39221	0.84486	1.18213	0.729837	1.27663	0.599287	1.63652	0.58827	1.56701	0.586066	3.05199	0.403693	0.747824	0.446318	0.961639	0.702548	2.04134	0.630888	2.10003	0.632124	1.45503	0.716345	1.63084	0.562214	0.572819	0.650276	0.917311	0.616022	1.2505	0.790018	1.77823	0.66232
O75061	DNAJC6	Putative tyrosine-protein phosphatase auxilin	NA	NA	NA	NA	NA	NA	NA	NA	NA	NA	NA	NA	NA	NA	NA	NA	NA	NA	NA	NA	0.492111	0.466174	0.551978	0.990219	0.412426	1.06282	0.321942	0.88754	0.537134	1.20555	0.395753	0.95119	0.604362	0.536646	0.177287	0.696941	0.56804	1.0377	0.342593	1.06019	0.42002	0.828485	0.46365	0.925967	0.322583	0.775103	0.536128
O75063	FAM20B	Glycosaminoglycan xylosylkinase	0.53765	1.27765	0.35489	1.71234	0.515046	0.830559	0.441276	1.21463	0.456807	1.50249	0.678152	1.10976	0.516509	0.81069	0.599709	0.931831	0.591318	1.31214	0.611982	0.937034	0.55971	1.00059	0.521635	1.23734	0.613912	0.92387	0.564843	0.786221	0.55104	1.0826	0.518569	1.04067	0.592517	1.28235	0.399874	0.817996	0.529633	1.31917	0.447472	2.04774	0.472875	0.907783	0.316504	1.54477	0.379643	0.917545	0.402017
O75071	EFCAB14	EF-hand calcium-binding domain-containing protein 14	NA	NA	NA	NA	NA	NA	NA	NA	NA	NA	NA	NA	NA	NA	NA	NA	NA	NA	NA	NA	NA	NA	NA	NA	NA	NA	NA	NA	NA	NA	NA	NA	NA	NA	NA	NA	NA	NA	NA	NA	NA	NA	NA	NA	NA	NA	NA
O75083	WDR1	WD repeat-containing protein 1	1.69955	0.717853	0.573248	0.698054	1.10716	0.796639	0.625514	0.743162	0.560042	1.12145	1.11918	0.743104	0.812515	0.93704	0.582142	1.08302	0.55726	0.950825	0.616154	1.09711	0.727787	1.29797	0.838531	0.8855	1.3973	1.48509	1.37985	1.17217	1.65984	1.05296	0.905654	0.872183	0.816842	0.957794	0.864449	1.04934	1.04041	0.850247	0.748433	1.11795	1.12507	1.19165	0.644154	1.37348	1.04977	1.62998	0.772946
O75094	SLIT3	Slit homolog 3 protein	NA	NA	NA	NA	NA	NA	NA	NA	NA	NA	NA	NA	NA	NA	NA	NA	NA	NA	NA	NA	NA	NA	NA	NA	NA	NA	NA	NA	NA	NA	1.00555	0.390278	1.429	1.21118	0.504286	0.697879	1.68094	2.48666	0.656754	1.68331	0.894254	0.639735	1.29157	0.986321	0.287761	0.731204	0.365978
O75096	LRP4	Low-density lipoprotein receptor-related protein 4	NA	NA	NA	NA	NA	NA	NA	NA	NA	NA	NA	NA	NA	NA	NA	NA	NA	NA	NA	NA	NA	NA	NA	NA	NA	NA	NA	NA	NA	NA	1.14954	1.06225	1.03938	1.00952	0.796112	1.13365	1.44475	1.49922	0.833876	2.26356	NA	NA	NA	NA	NA	NA	NA
O75110	ATP9A	Probable phospholipid-transporting ATPase IIA	0.539489	0.603976	0.299991	0.754734	0.530931	0.926029	0.394595	0.634768	0.409693	0.778164	0.639197	0.795946	0.405878	0.790474	0.499554	0.565383	0.516214	0.976895	0.54694	0.82724	0.504965	0.667033	0.498999	0.728461	0.513404	0.619461	0.43451	0.565373	0.548338	0.697413	0.518234	0.952399	0.476861	0.911642	0.454376	0.813018	0.57312	0.829595	0.461585	0.922667	0.473224	0.761107	0.450342	0.771999	0.510928	0.799802	0.488917
O75112	LDB3	LIM domain-binding protein 3	5.39142	1.09528	3.64114	1.12757	3.48549	1.35259	1.91643	0.977966	1.70933	1.40791	4.32817	0.971698	2.95783	0.979179	2.44928	1.36097	1.51509	1.10557	1.35166	0.690453	1.2183	1.12179	1.56638	1.32097	2.3883	0.92978	3.05972	1.60742	2.97439	1.47958	NA	NA	NA	NA	NA	NA	NA	NA	NA	NA	2.57629	1.17444	1.66081	1.11508	3.32286	1.41976	1.70839
O75113	N4BP1	NEDD4-binding protein 1	0.471179	0.913749	0.398205	0.767654	0.356059	0.792974	0.406618	0.884619	0.596361	1.04561	0.260448	1.71196	0.360867	0.922759	0.244707	0.901587	0.432653	0.838997	0.433017	1.46705	0.682214	1.99651	0.66025	1.47219	0.752195	1.11468	0.343549	1.10728	0.43629	1.28369	0.63891	1.54532	0.60711	2.1504	0.354386	1.38089	0.778503	1.8092	0.466061	1.08724	0.542161	1.07799	0.461909	1.23546	0.524542	1.17198	0.633282
O75116	ROCK2	Rho-associated protein kinase 2	0.564228	0.542209	0.373943	0.624245	0.852524	0.527626	0.54299	0.710718	0.481699	0.814895	0.570814	0.639975	0.518355	0.497256	0.439251	0.590334	0.567456	0.666999	0.571863	0.740358	0.631985	0.715322	0.662445	0.744303	0.935429	0.712688	0.820938	0.765288	1.03628	0.725584	0.663225	0.596449	0.544426	0.706755	0.485008	0.863482	0.6879	0.711184	0.629141	0.925499	0.643601	0.584341	0.471449	0.745382	0.570089	0.641632	0.527942
O75122	CLASP2	CLIP-associating protein 2	0.555808	0.662183	0.417819	0.610589	0.407007	0.622436	0.336272	0.442374	0.427926	0.553931	0.312736	0.54863	0.458206	0.673182	0.359432	0.792379	0.389661	0.777876	0.496403	0.720694	0.45234	0.619317	0.435632	0.697851	0.501089	0.570741	0.375998	0.659594	0.425189	0.510554	0.451719	0.352571	0.376209	0.591938	0.372924	0.490691	0.410374	0.82665	0.457651	1.0728	0.514853	0.735137	0.609085	0.774682	0.471504	0.855501	0.717843
O75127	PTCD1	Pentatricopeptide repeat-containing protein 1, mitochondrial	NA	NA	NA	NA	NA	NA	NA	NA	NA	NA	NA	NA	NA	NA	NA	NA	NA	NA	NA	NA	0.326564	0.791689	0.411971	0.454291	0.443161	0.607816	0.223641	0.383428	0.373238	0.646822	NA	NA	NA	NA	NA	NA	NA	NA	NA	NA	1.17851	0.674453	2.08083	0.867707	1.09014	1.16637	1.95555
O75131	CPNE3	Copine-3	1.10366	1.45552	0.627552	1.71152	1.13406	1.45934	0.939364	1.36174	1.00091	1.81909	0.891721	1.48092	0.660162	1.13155	0.649861	1.29563	0.988347	1.71726	0.922738	1.53766	0.894701	1.18868	0.957252	2.18716	1.1956	1.24104	0.926897	1.04517	1.15213	1.28675	0.999805	2.09622	0.704135	1.21578	0.758002	1.01206	1.07034	2.18601	0.667487	1.17492	0.769645	0.944439	0.71398	1.23348	0.761938	1.04262	0.733871
O75143	ATG13	Autophagy-related protein 13	0.750953	1.34394	0.547372	1.27951	0.753727	0.989352	0.676487	1.22202	0.737096	1.25222	0.573048	0.711026	0.4817	0.560542	0.536909	0.642426	0.467566	0.695318	0.545506	0.489979	NA	NA	NA	NA	NA	NA	NA	NA	NA	NA	0.738532	1.16574	0.915664	1.10066	0.74811	1.30429	0.944617	1.38532	0.744156	1.45274	0.620112	0.762213	0.67011	1.18477	0.601399	1.08141	0.866109
O75145	PPFIA3	Liprin-alpha-3	NA	NA	NA	NA	NA	NA	NA	NA	NA	NA	NA	NA	NA	NA	NA	NA	NA	NA	NA	NA	NA	NA	NA	NA	NA	NA	NA	NA	NA	NA	NA	NA	NA	NA	NA	NA	NA	NA	NA	NA	NA	NA	NA	NA	NA	NA	NA
O75146	HIP1R	Huntingtin-interacting protein 1-related protein	0.658635	0.827858	0.660127	1.00141	0.739956	1.24968	0.836357	0.926523	1.12109	1.15134	1.09289	1.39605	0.74196	1.03548	0.829178	1.30563	0.814608	1.19924	0.784945	1.20099	0.593114	1.04832	0.56192	1.15258	0.508375	0.793639	0.423753	0.81459	0.510534	0.880537	0.809165	1.40323	0.950294	1.66061	0.723448	1.29816	1.17542	1.80386	0.619319	2.28353	0.576997	0.783088	0.723493	1.19991	0.596038	0.803237	0.728562
O75147	OBSL1	Obscurin-like protein 1	0.950963	1.69548	0.58995	1.06625	1.30946	0.766834	0.950544	0.820938	0.821817	1.24472	1.24126	0.818476	0.925432	0.567639	0.956594	0.987914	1.37475	1.2132	1.27475	2.00963	0.872916	0.669417	1.02888	0.629436	1.20194	1.03684	0.747676	0.930565	1.24556	0.906742	1.56675	0.788887	1.1242	0.879044	0.866362	0.888205	1.55634	0.812542	1.06638	0.678032	1.23749	0.919088	1.01693	0.838176	0.967979	1.00145	0.964599
O75150	RNF40	E3 ubiquitin-protein ligase BRE1B	0.428185	0.68406	0.339556	0.72615	0.397137	0.439195	0.351549	0.531563	0.372102	0.783844	0.263625	0.66563	0.264318	0.575422	0.311482	0.679859	0.322285	0.635322	0.368335	0.606402	0.412289	0.754562	0.467067	0.731069	0.49077	0.608388	0.39386	0.663825	0.525426	0.601241	0.356293	0.504446	0.315654	0.890383	0.214167	0.582391	0.422061	0.89668	0.296638	0.846902	0.392263	0.577294	0.335855	0.761782	0.378971	0.671682	0.372463
O75151	PHF2	Lysine-specific demethylase PHF2	0.660051	1.3248	0.534086	1.2016	0.796591	0.895783	0.723861	0.750896	0.635859	1.41702	0.598792	1.10641	0.611227	0.952491	0.569944	1.0746	0.687609	1.52086	0.8	1.33076	NA	NA	NA	NA	NA	NA	NA	NA	NA	NA	0.703375	1.04485	0.440177	0.600834	0.686878	0.71243	0.71134	0.850289	0.635015	0.685219	NA	NA	NA	NA	NA	NA	NA
O75152	ZC3H11A	Zinc finger CCCH domain-containing protein 11A	0.256417	0.551198	0.219984	0.478091	0.256658	0.363398	0.201895	0.332131	0.234936	0.494913	0.317745	0.419238	0.302006	0.462903	0.297272	0.649729	0.279973	0.658283	0.294155	0.461591	0.258742	0.393252	0.264632	0.382194	0.320176	0.558869	0.214373	0.306582	0.256012	0.300829	0.274567	0.184392	0.274264	0.577818	0.153754	0.320085	0.347478	0.572637	0.234749	0.45525	0.215368	0.421879	0.191955	0.663622	0.21067	0.428831	0.173539
O75153	CLUH	Clustered mitochondria protein homolog	0.292013	0.788946	0.300823	0.764453	0.297597	0.382194	0.358038	0.671299	0.40649	0.61357	0.38321	0.456519	0.268866	0.486505	0.278143	0.543098	0.400187	0.612263	0.34308	0.55776	0.386156	0.482477	0.437531	0.831327	0.304384	0.665421	0.312049	0.496028	0.304346	0.569099	0.28844	0.441985	0.32627	0.591249	0.252836	0.480488	0.370993	0.546805	0.229941	0.455591	0.277553	0.401007	0.269061	0.653799	0.269929	0.554666	0.409119
O75155	CAND2	Cullin-associated NEDD8-dissociated protein 2	NA	NA	NA	NA	NA	NA	NA	NA	NA	NA	NA	NA	NA	NA	NA	NA	NA	NA	NA	NA	0.737425	0.768735	0.714549	0.705041	0.883063	0.726463	0.74963	0.822013	0.955499	0.758733	NA	NA	NA	NA	NA	NA	NA	NA	NA	NA	NA	NA	NA	NA	NA	NA	NA
O75157	TSC22D2	TSC22 domain family protein 2	NA	NA	NA	NA	NA	NA	NA	NA	NA	NA	NA	NA	NA	NA	NA	NA	NA	NA	NA	NA	0.527456	1.11748	0.349923	0.777249	0.705691	0.572562	0.390071	0.511076	0.367806	0.751064	0.539677	0.761581	0.530009	1.05448	0.979801	0.884397	0.737243	0.908289	1.09303	1.08157	NA	NA	NA	NA	NA	NA	NA
O75164	KDM4A	Lysine-specific demethylase 4A	NA	NA	NA	NA	NA	NA	NA	NA	NA	NA	NA	NA	NA	NA	NA	NA	NA	NA	NA	NA	NA	NA	NA	NA	NA	NA	NA	NA	NA	NA	NA	NA	NA	NA	NA	NA	NA	NA	NA	NA	NA	NA	NA	NA	NA	NA	NA
O75165	DNAJC13	DnaJ homolog subfamily C member 13	0.996708	1.63737	0.622055	1.36423	0.96895	1.34706	1.0024	1.47028	1.03043	1.71735	1.01831	1.52711	0.741508	1.48501	0.76217	1.30854	1.00585	1.43707	0.964495	1.3409	0.952522	1.26395	1.04807	1.68583	0.905415	1.59918	0.778042	1.54236	1.00831	1.19451	1.06853	1.32481	0.877284	1.52811	0.746193	1.37709	1.08852	1.81897	0.767322	1.34321	0.831646	1.56252	0.834328	2.11572	0.872746	1.35193	0.969494
O75167	PHACTR2	Phosphatase and actin regulator 2	NA	NA	NA	NA	NA	NA	NA	NA	NA	NA	NA	NA	NA	NA	NA	NA	NA	NA	NA	NA	NA	NA	NA	NA	NA	NA	NA	NA	NA	NA	NA	NA	NA	NA	NA	NA	NA	NA	NA	NA	0.604263	1.09886	0.955772	1.21261	0.908105	0.810982	0.78675
O75170	PPP6R2	Serine/threonine-protein phosphatase 6 regulatory subunit 2	0.728735	0.998733	0.5301	0.904915	0.692209	0.822553	0.60801	0.786351	0.567552	1.1261	0.624416	0.766607	0.590248	0.909646	0.610463	1.0963	0.839346	0.825976	0.798758	1.18548	0.680618	1.01179	0.675944	0.905024	0.782031	0.856079	0.516637	1.02535	0.621615	1.03531	0.415414	0.522624	0.535478	0.655081	0.397369	0.88442	0.529119	1.16751	0.476153	1.39183	0.474591	0.790346	0.461194	0.982152	0.485141	0.827886	0.550705
O75175	CNOT3	CCR4-NOT transcription complex subunit 3	0.296723	0.335204	0.251271	0.362782	0.266474	0.213471	0.183354	0.278417	0.218759	0.293044	NA	NA	NA	NA	NA	NA	NA	NA	NA	NA	0.494502	0.701726	0.507601	0.788491	0.578293	0.895819	0.327865	0.569165	0.480496	0.551277	0.555678	0.494909	0.59878	0.715705	0.565185	0.568307	0.546312	0.679166	0.478981	1.06187	0.326174	0.480901	0.294198	0.639801	0.330405	0.458577	0.358285
O75179	ANKRD17	Ankyrin repeat domain-containing protein 17	0.255462	0.597435	0.230892	0.41566	0.273124	0.285791	0.253099	0.477579	0.303791	0.443649	0.290486	0.405045	0.301416	0.374195	0.330297	0.459679	0.304917	0.47579	0.36907	0.554837	0.391508	0.811995	0.34372	0.684355	0.253338	0.73203	0.231091	0.522338	0.284194	0.553368	0.40859	0.631821	0.393983	0.907416	0.305262	0.609578	0.411354	0.772295	0.310599	0.752168	0.376479	0.541618	0.30861	0.591303	0.303206	0.592225	0.39433
O75182	SIN3B	Paired amphipathic helix protein Sin3b	1.10319	1.85973	0.709206	1.65319	1.63335	1.12577	0.853116	0.988167	1.13068	1.67726	1.18932	0.787375	0.971386	0.92257	1.3505	0.920909	0.72736	1.18915	0.842461	0.900011	0.510738	0.715913	0.629606	0.827709	0.69447	0.757137	0.471492	0.842161	0.936783	0.676813	2.72353	1.18253	1.58092	1.40309	1.36856	1.20239	3.49861	1.47204	1.37568	1.39111	NA	NA	NA	NA	NA	NA	NA
O75190	DNAJB6	DnaJ homolog subfamily B member 6	NA	NA	NA	NA	NA	NA	NA	NA	NA	NA	NA	NA	NA	NA	NA	NA	NA	NA	NA	NA	NA	NA	NA	NA	NA	NA	NA	NA	NA	NA	NA	NA	NA	NA	NA	NA	NA	NA	NA	NA	0.347594	0.618434	0.321663	0.906939	0.403275	1.03431	0.429587
O75191	XYLB	Xylulose kinase	0.567837	1.0348	0.557728	0.873739	0.693676	0.710716	0.753167	0.863903	0.743728	1.17601	0.477316	0.735554	0.457595	0.86616	0.39221	0.796522	0.561731	0.807869	0.512668	0.654833	0.384907	0.406386	0.445335	0.568306	0.328188	0.471002	0.284572	0.581688	0.396474	0.523872	0.821029	0.804592	0.826902	0.70504	0.639883	0.773179	0.908433	1.11776	0.626678	1.13174	0.979495	1.35776	0.790261	1.13021	0.708342	1.09469	0.962183
O75197	LRP5	Low-density lipoprotein receptor-related protein 5	1.73827	1.69872	1.1754	0.915677	1.74982	1.31777	1.85657	1.2952	1.61779	1.60646	1.86296	1.51904	1.27237	1.42041	1.44527	1.20012	1.78261	1.4123	1.72427	1.62136	2.16776	1.30494	2.06013	1.62869	1.83673	1.80687	1.51369	1.60678	1.90635	1.39797	2.53126	1.4236	1.75965	1.42689	1.38542	1.70486	2.00389	1.35887	1.89052	1.72515	2.1286	1.65062	1.75215	1.38342	1.65174	1.82534	1.93799
O75208	COQ9	Ubiquinone biosynthesis protein COQ9, mitochondrial	1.03458	0.80764	0.483854	0.946463	0.844256	0.739502	0.745105	0.749519	0.838596	1.50583	1.0808	0.666775	0.669776	0.740523	0.698233	0.923783	1.24268	1.38493	1.09585	0.765749	0.621398	0.777055	0.691608	1.00664	0.803081	0.502735	0.614341	0.698712	0.656506	0.970057	0.616039	0.752666	0.621293	0.568219	0.519448	0.811564	0.62604	1.09963	0.527234	0.722948	1.63582	1.03981	1.37495	1.26145	1.10715	0.867729	1.44396
O75223	GGCT	Gamma-glutamylcyclotransferase	0.779531	1.0316	0.647249	1.29734	0.662486	1.056	0.541669	1.11362	0.571261	1.85611	0.375848	0.883987	0.265994	0.996835	0.26573	0.827728	0.450468	1.03401	0.424421	0.496127	0.535094	0.914324	0.489063	1.06201	0.435085	0.650909	0.297339	0.677377	0.439131	1.02803	0.454068	1.28764	0.409185	0.965698	0.339744	0.864729	0.50167	2.6784	0.267014	1.88302	0.341228	0.729725	0.357332	1.5159	0.46319	1.16501	0.431522
O75251	NDUFS7	NADH dehydrogenase [ubiquinone] iron-sulfur protein 7, mitochondrial	0.742301	1.16242	0.504217	1.29115	0.714951	0.96268	0.736104	1.02157	0.880026	1.38494	1.26058	1.15131	0.880578	1.47629	1.25961	1.52082	1.53066	2.24254	1.44971	1.78809	0.737988	0.779176	0.811802	1.18873	0.701032	0.903118	0.711153	1.05725	0.752087	1.12304	0.813332	0.904176	0.819015	0.847748	0.520305	0.904527	1.04442	1.61191	0.611931	1.60122	0.698516	1.04593	0.712095	1.05587	0.736044	1.16745	0.795424
O75298	RTN2	Reticulon-2	NA	NA	NA	NA	NA	NA	NA	NA	NA	NA	NA	NA	NA	NA	NA	NA	NA	NA	NA	NA	NA	NA	NA	NA	NA	NA	NA	NA	NA	NA	0.684179	0.672739	0.632635	0.784459	0.828923	0.669113	0.780704	0.877013	0.904036	0.731578	NA	NA	NA	NA	NA	NA	NA
O75306	NDUFS2	NADH dehydrogenase [ubiquinone] iron-sulfur protein 2, mitochondrial	0.908314	1.34315	0.560573	1.69375	0.846586	1.19387	0.737943	1.05263	0.940153	1.6683	0.712544	0.849426	0.526768	1.03625	0.568621	1.35774	0.790737	1.9115	0.707451	1.60215	0.851795	1.12373	0.869642	1.36073	0.808661	0.843865	0.761919	1.24083	0.905681	1.34293	0.71395	1.06843	0.717212	0.78477	0.592795	0.92213	0.895963	1.59139	0.606545	1.66667	0.792252	1.10913	0.658591	1.06704	0.755723	1.13145	0.915933
O75312	ZPR1	Zinc finger protein ZPR1	0.412464	0.490975	0.301589	0.753526	0.369687	0.444253	0.418702	0.823276	0.40728	0.846052	0.287293	0.596798	0.219604	0.468185	0.225408	0.469746	0.293842	0.525219	0.272166	0.663528	0.436999	0.66483	0.39591	0.620226	0.383075	0.527318	0.335651	0.672477	0.413279	0.941007	0.441176	0.508188	0.417507	0.57189	0.320985	0.510018	0.503869	0.61024	0.325614	0.897302	0.415852	0.614165	0.341388	0.704987	0.32397	0.596772	0.413129
O75317	USP12	Ubiquitin carboxyl-terminal hydrolase 12	1.17194	1.81576	0.82206	1.30032	1.27192	1.22617	0.994361	1.09292	0.97857	1.67218	1.27052	1.14426	0.424464	1.44367	0.77002	1.39083	0.802456	1.99873	0.769278	1.67655	0.814488	1.04898	0.95606	1.18735	0.909025	0.924464	0.713617	1.01378	0.878545	0.974018	NA	NA	NA	NA	NA	NA	NA	NA	NA	NA	NA	NA	NA	NA	NA	NA	NA
O75319	DUSP11	RNA/RNP complex-1-interacting phosphatase	0.593125	1.336	0.513887	1.02016	0.607227	0.859452	0.615461	0.770261	0.725913	1.53248	0.342299	0.857042	0.396174	0.82938	0.321205	0.776705	0.37185	1.51056	0.467212	0.871991	0.279265	0.979355	0.286093	1.1459	0.312005	0.754824	0.191409	0.79748	0.295302	0.872308	0.680187	1.68147	0.8891	1.36946	0.478667	0.784361	0.44798	0.936489	0.328382	0.716435	NA	NA	NA	NA	NA	NA	NA
O75323	NIPSNAP2	Protein NipSnap homolog 2	0.953117	0.951775	0.343501	1.01278	0.845914	0.821876	0.607081	1.05244	0.660505	1.319	0.749683	0.813217	0.516102	0.94465	0.553992	1.11484	0.581895	1.41204	0.702619	1.78852	0.799153	1.00204	0.636493	1.19087	1.18717	0.724714	0.992818	1.1409	1.15329	0.828266	0.86369	1.03796	0.814251	0.828106	0.708071	1.22674	0.918364	1.68713	0.738861	2.30033	0.788008	1.08682	0.52039	1.23363	0.744225	1.05583	0.639104
O75339	CILP	Cartilage intermediate layer protein 1	0.946434	1.37651	0.589262	0.903173	1.37005	0.977511	0.520608	0.903664	1.12226	1.08742	5.04674	1.07893	1.22719	1.05628	2.2496	0.911367	0.835851	0.950079	1.28339	0.845469	3.32159	0.986804	1.37609	1.10394	1.21294	2.02416	1.32862	1.13033	1.00746	1.13522	3.07937	0.984624	2.09621	1.14464	1.53789	1.13543	1.75288	1.17408	3.14124	1.16031	NA	NA	NA	NA	NA	NA	NA
O75340	PDCD6	Programmed cell death protein 6	0.629295	0.778988	0.312622	1.01064	0.487192	0.606732	0.370086	1.19404	0.451347	1.10123	0.354923	0.623606	0.266841	0.599057	0.275419	0.671085	0.378759	1.10885	0.468441	0.844688	0.496157	0.728583	0.484314	1.40013	0.710491	0.575686	0.441709	0.751616	0.675854	0.770971	0.468404	0.93346	0.403654	1.02779	0.384242	0.734695	0.49843	0.920146	0.38554	1.08263	0.472257	0.69158	0.402397	0.70929	0.400106	0.684692	0.476705
O75346	ZNF253	Zinc finger protein 253	0.322836	0.849946	0.384646	0.526982	0.316697	0.578435	0.39691	0.248153	0.225639	0.933429	NA	NA	NA	NA	NA	NA	NA	NA	NA	NA	0.286952	0.485054	0.432544	0.496758	0.769984	0.525272	0.402036	0.396374	0.485494	0.485934	NA	NA	NA	NA	NA	NA	NA	NA	NA	NA	NA	NA	NA	NA	NA	NA	NA
O75347	TBCA	Tubulin-specific chaperone A	0.259624	0.187112	0.165006	0.380098	0.208953	0.316902	0.186746	0.406364	0.166676	0.347518	0.220378	0.199201	0.130848	0.215978	0.172471	0.293502	0.151322	0.273919	0.152508	0.228831	0.250082	0.378823	0.217254	0.351918	0.271124	0.476157	0.223631	0.265984	0.259521	0.382214	0.183413	0.313345	0.229372	0.313336	0.201543	0.291403	0.206255	0.368635	0.185507	0.496124	0.206909	0.300334	0.189598	0.31508	0.169866	0.367269	0.200662
O75348	ATP6V1G1	V-type proton ATPase subunit G 1	0.824188	1.34113	0.509038	1.07363	0.583175	0.783746	0.627869	1.08243	0.648514	0.95624	0.52424	0.868744	0.531241	1.395	0.535634	1.3181	0.670651	1.00897	0.656055	1.16026	0.664289	0.870049	0.726494	0.930768	0.725156	0.944927	0.665566	1.11901	0.69669	0.784355	2.02446	1.94099	1.71138	2.10088	0.927913	1.63293	1.82283	1.59831	0.835366	1.71877	0.528643	0.987926	0.546522	1.30408	0.379948	1.02183	0.531411
O75351	VPS4B	Vacuolar protein sorting-associated protein 4B	0.758724	1.29871	0.460514	1.07163	0.495409	1.38214	0.438283	1.2449	0.554545	1.13182	0.503266	1.09732	0.432355	0.717046	0.465492	0.997237	0.563481	0.844994	0.530186	1.34962	0.90403	1.08899	0.903702	1.93688	0.694698	1.03731	0.535002	1.13717	0.702834	1.19335	0.663557	1.01808	0.653898	1.30971	0.405881	1.05744	0.75897	1.35112	0.471333	1.05789	0.648717	1.37512	0.681541	1.71779	0.817911	1.46934	0.792598
O75352	MPDU1	Mannose-P-dolichol utilization defect 1 protein	NA	NA	NA	NA	NA	NA	NA	NA	NA	NA	NA	NA	NA	NA	NA	NA	NA	NA	NA	NA	NA	NA	NA	NA	NA	NA	NA	NA	NA	NA	NA	NA	NA	NA	NA	NA	NA	NA	NA	NA	NA	NA	NA	NA	NA	NA	NA
O75355	ENTPD3	Ectonucleoside triphosphate diphosphohydrolase 3	0.777397	0.917773	0.55583	2.50029	0.945425	0.936159	0.587108	3.15008	0.749891	1.39355	NA	NA	NA	NA	NA	NA	NA	NA	NA	NA	NA	NA	NA	NA	NA	NA	NA	NA	NA	NA	1.4938	1.33184	1.65039	1.61479	0.982026	0.883647	2.61731	1.34695	1.52403	10.5222	2.20676	1.62871	0.748998	1.00408	0.614746	2.12639	0.629918
O75356	ENTPD5	Ectonucleoside triphosphate diphosphohydrolase 5	1.20366	1.29932	0.803699	1.26582	0.815689	1.09264	0.928359	1.13406	0.95574	1.61293	NA	NA	NA	NA	NA	NA	NA	NA	NA	NA	NA	NA	NA	NA	NA	NA	NA	NA	NA	NA	0.941415	0.929998	0.477174	0.635285	0.597474	1.24355	1.04493	1.12391	1.08718	1.32802	0.852891	0.839522	1.3188	0.792172	0.777563	1.44926	0.966887
O75365	PTP4A3	Protein tyrosine phosphatase type IVA 3	NA	NA	NA	NA	NA	NA	NA	NA	NA	NA	NA	NA	NA	NA	NA	NA	NA	NA	NA	NA	NA	NA	NA	NA	NA	NA	NA	NA	NA	NA	NA	NA	NA	NA	NA	NA	NA	NA	NA	NA	NA	NA	NA	NA	NA	NA	NA
O75366	AVIL	Advillin	NA	NA	NA	NA	NA	NA	NA	NA	NA	NA	NA	NA	NA	NA	NA	NA	NA	NA	NA	NA	NA	NA	NA	NA	NA	NA	NA	NA	NA	NA	NA	NA	NA	NA	NA	NA	NA	NA	NA	NA	NA	NA	NA	NA	NA	NA	NA
O75367	H2AFY	Core histone macro-H2A.1	0.730328	1.27563	0.522675	1.37196	1.12971	1.66899	0.807062	1.24296	0.681393	1.65085	0.405396	0.892564	0.314519	1.09259	0.383776	0.854775	0.489861	1.38569	0.563281	1.07201	0.303336	0.728109	0.585099	0.983218	0.457694	0.35339	0.283624	0.477297	0.569015	0.896129	0.349005	1.03233	0.196653	0.363808	0.333404	1.06352	0.341854	0.629469	0.469767	0.703028	0.194313	0.407588	0.25098	0.730168	0.226683	1.04481	0.342605
O75368	SH3BGRL	SH3 domain-binding glutamic acid-rich-like protein	3.29232	0.695602	1.73807	0.795684	2.09972	1.21037	1.69558	1.11317	1.38926	1.29438	2.36837	1.19679	1.69239	1.82383	1.5183	1.48214	1.339	1.12936	1.44172	1.10644	1.66061	1.27394	1.57492	0.899579	2.12173	1.08104	2.48557	1.50289	3.09381	1.24966	2.26237	1.34356	1.56098	1.11633	2.20369	2.17851	2.80681	1.75362	2.04234	1.94901	3.15646	1.98537	1.62847	1.45137	2.75587	1.83996	1.61892
O75369	FLNB	Filamin-B	0.25765	1.17289	0.225317	0.463598	0.267923	0.672001	0.29729	0.722972	0.344731	0.72404	0.321266	0.372999	0.222223	0.372999	0.258262	0.413398	0.328603	0.507705	0.2738	1.24399	0.262087	0.5464	0.297289	0.54638	0.281168	0.476068	0.238687	0.538641	0.274309	0.461247	0.294687	0.520056	0.244164	0.648265	0.219185	0.242894	0.304342	0.564328	0.216786	0.449444	0.229175	0.370607	0.234961	0.406571	0.238888	0.748806	0.279567
O75376	NCOR1	Nuclear receptor corepressor 1	0.355533	0.869218	0.352025	0.782882	0.36242	0.787923	0.574	0.783201	0.58504	0.991977	1.33476	0.595982	0.697753	0.288196	0.775856	0.401612	0.284154	0.456768	0.297212	0.376801	0.325416	0.576472	0.394762	0.504859	0.560277	0.566061	0.228337	0.489512	0.245674	0.2499	0.3815	0.41479	0.340887	0.881916	0.256282	0.531103	0.375602	0.665669	0.291388	0.502955	NA	NA	NA	NA	NA	NA	NA
O75380	NDUFS6	NADH dehydrogenase [ubiquinone] iron-sulfur protein 6, mitochondrial	0.61719	1.60152	0.403142	1.60642	0.47009	0.377463	0.45019	1.08215	0.655502	1.04427	0.539175	0.890023	0.591647	1.35192	0.48549	1.44401	1.08445	1.98001	0.736534	1.84537	0.73806	0.794133	0.714923	1.00332	0.676821	0.759334	0.405332	0.97738	0.448255	0.799283	0.852276	0.655126	0.903138	1.09313	0.271105	1.06486	0.816894	1.43026	0.660933	2.40247	0.898678	1.17474	0.900963	1.17058	0.871839	1.16438	0.967287
O75381	PEX14	Peroxisomal membrane protein PEX14	0.23096	0.492387	0.181512	0.374579	0.171782	0.258898	0.181015	0.316395	0.205857	0.344578	0.228116	0.333871	0.30331	0.301418	0.23326	0.433838	0.259367	0.339931	0.209396	0.472521	0.371053	0.723017	0.326875	1.01242	0.31825	0.475866	0.195886	0.315425	0.15902	0.32977	0.294997	0.277853	0.291934	0.429025	0.16473	0.5224	0.30088	0.570185	0.202327	0.770691	0.377447	0.552609	0.342394	0.566838	0.358476	0.515659	0.408247
O75382	TRIM3	Tripartite motif-containing protein 3	1.08502	0.762939	1.02902	0.757713	1.01626	0.679314	3.16389	0.937078	1.89163	1.01646	0.88295	0.96012	0.792393	0.74909	0.71776	0.931193	0.912042	0.935927	0.96372	0.923613	0.634885	0.676112	0.646183	0.658518	0.759751	0.726007	0.674927	0.72071	0.977775	0.680298	2.79092	0.913545	1.96405	1.20611	1.38395	1.16535	1.9225	1.09133	1.53435	1.56772	1.45448	0.875127	1.12178	0.986641	1.08596	0.940032	1.09864
O75387	SLC43A1	Large neutral amino acids transporter small subunit 3	NA	NA	NA	NA	NA	NA	NA	NA	NA	NA	NA	NA	NA	NA	NA	NA	NA	NA	NA	NA	NA	NA	NA	NA	NA	NA	NA	NA	NA	NA	NA	NA	NA	NA	NA	NA	NA	NA	NA	NA	NA	NA	NA	NA	NA	NA	NA
O75390	CS	Citrate synthase, mitochondrial	0.543297	0.71721	0.331721	0.857609	0.43413	0.779046	0.421196	0.742874	0.531165	1.24076	0.5266	0.801935	0.382068	0.711577	0.329517	0.964936	0.533991	0.917706	0.483375	0.783496	0.574474	0.937865	0.508433	1.07172	0.505982	0.643329	0.45423	0.930649	0.504737	1.12581	0.450865	1.01498	0.434728	0.688796	0.341087	0.793521	0.462985	1.01403	0.348434	1.8831	0.416633	0.749322	0.34099	0.939277	0.41548	0.930407	0.45014
O75391	SPAG7	Sperm-associated antigen 7	NA	NA	NA	NA	NA	NA	NA	NA	NA	NA	0.1555	0.251713	0.147486	0.319903	0.13887	0.356892	0.211067	0.480294	0.217271	0.291139	0.218036	0.272702	0.17051	0.306224	0.256949	0.211156	0.124665	0.300141	0.211533	0.309958	0.333081	0.405849	0.325794	0.503615	0.280201	0.503486	0.403908	0.611216	0.295816	0.380705	0.304913	0.439716	0.292543	0.509508	0.256737	0.659508	0.32568
O75396	SEC22B	Vesicle-trafficking protein SEC22b	0.361154	0.445487	0.362221	0.646184	0.283571	0.523244	0.311813	0.565683	0.314143	0.500664	0.34625	0.382902	0.176762	0.844184	0.403055	0.788999	0.269425	0.588414	0.342184	0.463877	0.467407	0.443372	0.336926	0.664821	0.348498	0.530382	0.316805	0.587626	0.310136	0.521441	0.407067	0.709389	0.38433	0.389157	0.438773	0.539775	0.391556	0.515553	0.421663	1.01631	0.24479	0.437596	0.184641	0.444614	0.188645	0.373702	0.227211
O75400	PRPF40A	Pre-mRNA-processing factor 40 homolog A	0.314642	0.94757	0.264299	0.922355	0.376785	0.591801	0.331371	0.788288	0.399678	1.18703	0.40866	0.764757	0.355631	0.697298	0.31246	0.737648	0.452643	0.95386	0.473308	0.849733	0.295672	0.747027	0.397555	0.944826	0.369894	0.750868	0.21749	0.617815	0.288197	0.744516	0.308311	0.683711	0.238116	0.939477	0.257707	0.548701	0.389799	0.767827	0.265163	0.964237	0.307565	0.575326	0.275609	0.944155	0.314353	0.786751	0.34703
O75410	TACC1	Transforming acidic coiled-coil-containing protein 1	0.881794	1.15897	0.62864	0.851662	0.83216	0.892636	0.626021	0.760912	0.840397	1.06505	0.735631	0.947065	0.706144	1.18067	0.765911	1.36879	0.703456	1.05836	0.776931	0.770011	NA	NA	NA	NA	NA	NA	NA	NA	NA	NA	0.788969	0.890035	0.718756	0.932769	0.63011	0.999853	0.896049	1.21426	0.745697	1.65969	0.950128	1.00263	0.682327	1.04805	0.93993	1.1476	0.909485
O75419	CDC45	Cell division control protein 45 homolog	0.280444	0.717972	0.191653	0.697302	0.215604	0.249494	0.242171	0.380551	0.23805	0.473376	NA	NA	NA	NA	NA	NA	NA	NA	NA	NA	NA	NA	NA	NA	NA	NA	NA	NA	NA	NA	0.163202	0.460746	0.122531	0.653453	0.10413	0.352638	0.142193	0.52822	0.142926	0.433616	NA	NA	NA	NA	NA	NA	NA
O75420	GIGYF1	GRB10-interacting GYF protein 1	NA	NA	NA	NA	NA	NA	NA	NA	NA	NA	NA	NA	NA	NA	NA	NA	NA	NA	NA	NA	NA	NA	NA	NA	NA	NA	NA	NA	NA	NA	0.699387	0.589143	0.534087	0.774881	0.376733	0.420629	0.483954	0.561281	0.642286	0.692203	NA	NA	NA	NA	NA	NA	NA
O75427	LRCH4	Leucine-rich repeat and calponin homology domain-containing protein 4	1.22897	1.02309	0.672998	0.964896	0.907482	1.07619	0.645432	0.953956	0.853082	1.08459	NA	NA	NA	NA	NA	NA	NA	NA	NA	NA	NA	NA	NA	NA	NA	NA	NA	NA	NA	NA	NA	NA	NA	NA	NA	NA	NA	NA	NA	NA	1.62721	2.09747	4.83112	3.33897	1.23643	1.7773	7.8965
O75431	MTX2	Metaxin-2	NA	NA	NA	NA	NA	NA	NA	NA	NA	NA	0.562726	0.688106	0.566782	0.654965	0.533732	0.979464	0.46403	1.09442	0.510432	0.954999	0.480634	0.621099	0.374534	0.793461	0.453311	0.428272	0.349591	0.74825	0.49765	0.724932	0.628439	0.79682	0.654467	0.71356	0.616986	0.784389	0.74634	0.816917	0.645129	0.8632	0.790109	0.785726	0.956309	1.09723	0.808448	0.836935	0.931767
O75436	VPS26A	Vacuolar protein sorting-associated protein 26A	0.808197	1.09655	0.489925	1.55986	0.801867	1.12617	0.81321	1.28969	0.80181	1.57976	0.903149	1.21903	0.565056	1.24826	0.576032	1.08477	0.794329	1.37385	0.77829	1.12288	0.956073	1.3141	0.965353	1.57446	1.02167	0.915221	0.806611	1.24178	1.17007	1.31064	1.00118	1.5151	0.804229	1.51749	0.689678	1.12786	0.993259	1.41912	0.739598	1.64764	0.756264	1.08311	0.681463	1.39543	0.738307	1.31709	0.801607
O75438	NDUFB1	NADH dehydrogenase [ubiquinone] 1 beta subcomplex subunit 1	NA	NA	NA	NA	NA	NA	NA	NA	NA	NA	NA	NA	NA	NA	NA	NA	NA	NA	NA	NA	NA	NA	NA	NA	NA	NA	NA	NA	NA	NA	NA	NA	NA	NA	NA	NA	NA	NA	NA	NA	NA	NA	NA	NA	NA	NA	NA
O75439	PMPCB	Mitochondrial-processing peptidase subunit beta	0.440462	0.7751	0.247584	0.685299	0.377316	0.432228	0.367088	0.564587	0.412786	0.902621	0.392631	0.437027	0.303684	0.443307	0.23219	0.590268	0.328064	0.565028	0.304995	0.556536	0.377177	0.544592	0.347985	0.677115	0.323769	0.519538	0.236815	0.527908	0.266638	0.619569	0.446601	0.501423	0.381135	0.466925	0.318928	0.490761	0.45267	0.668951	0.324259	0.929671	0.348519	0.4849	0.326711	0.61759	0.371466	0.515726	0.394814
O75446	SAP30	Histone deacetylase complex subunit SAP30	0.530317	0.923048	0.63988	0.824179	0.423885	0.721264	0.472742	0.787979	0.602295	0.744855	0.18678	0.358498	0.187495	0.358077	0.204652	0.486724	0.254832	0.510212	0.241505	0.401095	0.230168	0.55992	0.311477	0.491329	0.383061	0.45735	0.219552	0.441911	0.230067	0.352089	0.30597	0.515263	0.265088	0.640162	0.240621	0.379154	0.403953	0.589455	0.248771	0.358739	NA	NA	NA	NA	NA	NA	NA
O75448	MED24	Mediator of RNA polymerase II transcription subunit 24	0.219785	0.541518	0.220032	0.54398	0.296668	0.48701	0.26781	0.392936	0.252139	0.703547	0.254875	0.528243	0.243948	0.404058	0.250269	0.658984	0.261448	0.612652	0.307108	0.621949	0.386432	0.706892	0.392806	0.79358	0.411474	0.543434	0.312654	0.556199	0.372366	0.638269	0.247943	0.588222	0.216535	0.714878	0.230765	0.602055	0.315619	0.82846	0.254147	0.62832	0.234022	0.483317	0.205378	0.755078	0.245371	0.573485	0.312544
O75449	KATNA1	Katanin p60 ATPase-containing subunit A1	0.645088	0.683848	0.316559	0.937077	0.523793	0.819889	0.432433	0.818631	0.440259	1.16364	0.324158	0.559213	0.261576	0.587916	0.298428	0.543172	0.262817	0.533013	0.352732	0.655417	0.823679	0.748098	0.923563	0.928909	1.15439	0.862744	0.753176	0.964098	2.65247	1.10788	0.871096	1.40615	0.824817	0.757238	0.426313	0.882549	0.961287	1.35861	0.525886	1.05067	0.506204	0.881026	0.55575	0.782728	0.402649	0.917194	0.43102
O75452	RDH16	Retinol dehydrogenase 16	3.44495	1.90869	2.88414	1.30215	1.52878	1.71136	1.96786	1.13234	2.80243	2.20868	2.77438	1.14873	1.48763	1.26564	1.88615	1.8244	1.2706	1.11071	1.12605	1.06534	NA	NA	NA	NA	NA	NA	NA	NA	NA	NA	5.06002	0.707978	1.09324	0.841673	3.39832	1.06222	1.51261	1.16359	4.57529	0.53552	1.71338	1.43495	1.34583	1.25788	1.72848	2.74815	0.943887
O75475	PSIP1	PC4 and SFRS1-interacting protein	0.193183	0.399454	0.164926	0.28034	0.246413	0.200892	0.145933	0.182048	0.155882	0.334338	0.236217	0.273758	0.224501	0.336334	0.217561	1.95079	0.237558	0.498314	0.304288	0.309201	0.382137	0.447979	0.35705	0.46063	0.611645	0.5353	0.218885	0.376693	0.259987	0.279814	0.295596	0.203209	0.197577	0.289968	0.152849	0.433123	0.243147	0.520889	0.272631	0.290763	0.294119	0.419004	0.20645	0.386476	0.223615	0.342385	0.18201
O75477	ERLIN1	Erlin-1	0.653174	1.39295	0.547856	1.1526	1.08325	0.688078	0.82743	0.870004	0.839574	1.19922	0.677756	0.847047	0.581788	0.730556	0.651598	1.06203	0.868511	1.55364	1.04046	1.16387	0.756639	0.814264	0.876796	0.757589	1.00218	0.790478	0.616812	0.722049	0.674516	0.913009	0.621146	0.712431	0.483039	0.767516	0.402069	0.857396	0.647565	0.88699	0.614682	1.21568	0.547168	0.734637	0.597209	0.751537	0.556232	0.742901	0.480369
O75486	SUPT3H	Transcription initiation protein SPT3 homolog	NA	NA	NA	NA	NA	NA	NA	NA	NA	NA	0.417163	0.906128	0.398362	0.579071	0.353856	1.05237	0.480809	1.17738	0.60392	1.05726	0.324367	0.939516	0.458534	0.924845	0.372173	0.631936	0.307424	0.681247	0.272492	0.603206	NA	NA	NA	NA	NA	NA	NA	NA	NA	NA	0.354706	0.524773	0.376852	0.841695	0.461621	0.778678	0.447881
O75487	GPC4	Glypican-4	2.5446	1.71123	1.01765	1.1737	3.11647	1.31009	0.690004	1.11699	0.679048	1.63547	1.49592	1.04419	1.20634	0.790096	1.5164	2.16606	1.05695	2.38202	0.985824	0.904336	0.987781	1.49913	0.891983	0.944588	3.0936	1.7791	1.67197	1.16421	1.82478	1.38134	1.31794	0.907957	0.937585	1.46957	0.710206	0.818663	1.02286	0.490582	1.15269	0.743321	NA	NA	NA	NA	NA	NA	NA
O75489	NDUFS3	NADH dehydrogenase [ubiquinone] iron-sulfur protein 3, mitochondrial	0.696614	1.40169	0.37285	1.58333	0.600733	1.05256	0.478177	0.830295	0.530155	1.37169	0.567844	0.777872	0.386037	0.845898	0.347325	1.45701	0.565551	1.9635	0.572656	1.58307	0.790218	1.0385	0.705658	1.19313	0.679558	0.690058	0.586257	1.05858	0.622399	1.09852	0.480827	0.746456	0.53349	0.636839	0.374739	0.829728	0.569351	1.22858	0.355594	1.01827	0.307348	0.842169	0.310637	0.800618	0.486752	0.931427	0.426796
O75494	SRSF10	Serine/arginine-rich splicing factor 10	0.317801	0.858157	0.2519	0.728518	0.282842	0.419704	0.261841	0.660287	0.323742	0.643978	0.377911	0.766276	0.240762	0.575872	0.297705	0.851393	0.365095	0.939296	0.410367	0.862683	0.386008	0.442823	0.325055	0.481107	0.332988	0.67962	0.321421	0.321137	0.278372	0.346508	0.186609	0.361534	0.330523	0.733189	0.108566	0.297892	0.181072	0.412217	0.217944	1.00057	0.204928	0.545107	0.148937	0.561272	0.243176	0.437836	0.208786
O75503	CLN5	Ceroid-lipofuscinosis neuronal protein 5	0.867083	1.36853	0.301038	0.995433	0.515011	0.934515	0.66445	0.950332	0.774767	1.19568	NA	NA	NA	NA	NA	NA	NA	NA	NA	NA	0.683123	0.959576	0.587549	0.814962	0.581224	0.952654	0.759075	0.945512	0.516818	0.752301	0.452671	0.339204	0.293339	0.648629	0.477851	0.339946	0.398515	0.792163	0.300722	0.554403	0.592692	0.841469	0.389971	0.845072	0.527104	1.00928	0.466659
O75521	ECI2	Enoyl-CoA delta isomerase 2, mitochondrial	0.640828	1.05835	0.332909	0.791091	0.579723	0.463312	0.564583	0.965926	0.550395	0.726255	0.322258	0.306214	0.323901	0.492632	0.262431	0.457775	0.413254	0.661349	0.413552	0.253555	0.699273	0.351328	0.517691	0.421332	0.834926	0.279747	0.33651	0.562589	0.486866	0.577263	0.47122	0.471128	0.382364	0.497576	0.351743	0.609843	0.634634	0.722355	0.428817	4.3931	0.504441	0.555092	0.471584	0.600138	0.441487	0.610947	0.463506
O75525	KHDRBS3	KH domain-containing, RNA-binding, signal transduction-associated protein 3	NA	NA	NA	NA	NA	NA	NA	NA	NA	NA	NA	NA	NA	NA	NA	NA	NA	NA	NA	NA	NA	NA	NA	NA	NA	NA	NA	NA	NA	NA	0.34409	0.206097	0.360417	0.27587	0.259461	0.460182	0.53325	0.452013	0.348414	1.35984	0.395323	0.509824	0.359884	0.385483	0.396992	0.454439	0.440006
O75526	RBMXL2	RNA-binding motif protein, X-linked-like-2	0.117768	0.270876	0.0854323	0.283789	0.128522	0.175628	0.0973666	0.215528	0.115297	0.296377	0.116505	0.198956	0.0964829	0.243102	0.0932137	0.285395	0.110026	0.344359	0.153659	0.232828	0.256777	0.50803	0.211681	0.383132	0.280565	0.154512	0.138426	0.434153	0.236605	0.404877	0.211864	0.345741	0.147246	0.324613	0.112076	0.282437	0.214896	0.389049	0.169455	0.453222	0.238417	0.395114	0.214271	0.463977	0.158065	0.420893	0.163713
O75529	TAF5L	TAF5-like RNA polymerase II p300/CBP-associated factor-associated factor 65 kDa subunit 5L	NA	NA	NA	NA	NA	NA	NA	NA	NA	NA	NA	NA	NA	NA	NA	NA	NA	NA	NA	NA	NA	NA	NA	NA	NA	NA	NA	NA	NA	NA	NA	NA	NA	NA	NA	NA	NA	NA	NA	NA	NA	NA	NA	NA	NA	NA	NA
O75530	EED	Polycomb protein EED	0.139885	0.600157	0.155354	0.407114	0.182695	0.315032	0.230222	0.261161	0.190841	0.464447	0.321356	0.778849	0.222576	0.614937	0.227571	0.695932	0.28522	0.825737	0.360663	0.537571	0.457063	0.881967	0.560325	0.925637	0.446089	0.687747	0.366448	0.952249	0.422841	0.97294	0.880496	0.8505	0.71339	0.746591	0.580921	0.679233	0.906616	0.987944	0.557145	0.656748	0.721652	0.634099	0.583691	0.495933	0.367057	0.538693	0.578206
O75531	BANF1	Barrier-to-autointegration factor	1.12186	0.683503	0.437761	0.58482	0.680878	0.417831	0.607972	0.527647	0.4336	0.689069	0.368089	0.356478	0.274556	0.347994	0.334842	0.457617	0.3056	0.615536	0.380625	0.51359	0.425343	0.574755	0.348292	0.65988	0.696704	0.511145	0.446085	0.538389	0.592299	0.594623	0.33649	0.742745	0.25919	0.482802	0.317928	0.751474	0.354493	0.578313	0.381316	0.627231	0.387339	0.433072	0.126265	0.455232	0.356988	0.285023	0.232206
O75533	SF3B1	Splicing factor 3B subunit 1	0.200045	0.823817	0.196576	0.624467	0.209642	0.388597	0.206932	0.370167	0.214707	0.664127	0.250783	0.672633	0.236402	0.465988	0.213546	0.70815	0.305918	0.738986	0.311344	0.731682	0.314687	0.803793	0.347086	0.816188	0.413875	0.65556	0.218809	0.606605	0.280941	0.580061	0.303903	0.40684	0.27144	0.857566	0.330537	0.528447	0.339146	0.760039	0.285007	0.882157	0.241427	0.556116	0.191305	0.776545	0.243071	0.530181	0.281397
O75534	CSDE1	Cold shock domain-containing protein E1	0.261763	0.697206	0.205404	0.573794	0.237405	0.441605	0.292917	0.546139	0.295725	0.753316	0.292674	0.525127	0.245329	0.443877	0.219102	0.562092	0.33596	0.536798	0.295498	0.57724	0.309479	0.488139	0.277146	0.437419	0.278834	0.625012	0.252109	0.482457	0.310248	0.598784	0.344476	0.582396	0.321287	0.610117	0.287677	0.502064	0.394229	0.693687	0.266512	0.600931	0.357664	0.431778	0.295171	0.604523	0.31483	0.632492	0.338685
O75554	WBP4	WW domain-binding protein 4	NA	NA	NA	NA	NA	NA	NA	NA	NA	NA	NA	NA	NA	NA	NA	NA	NA	NA	NA	NA	0.19162	0.582578	0.161786	0.520754	0.183969	0.294775	0.101728	0.2762	0.0855582	0.323631	NA	NA	NA	NA	NA	NA	NA	NA	NA	NA	NA	NA	NA	NA	NA	NA	NA
O75556	SCGB2A1	Mammaglobin-B	NA	NA	NA	NA	NA	NA	NA	NA	NA	NA	NA	NA	NA	NA	NA	NA	NA	NA	NA	NA	NA	NA	NA	NA	NA	NA	NA	NA	NA	NA	0.484244	0.756276	0.504158	0.88166	0.455327	0.739515	0.556728	0.585162	0.400315	3.29205	NA	NA	NA	NA	NA	NA	NA
O75558	STX11	Syntaxin-11	0.388645	0.704286	0.232728	0.44387	0.440643	0.529133	0.381425	0.505159	0.344353	0.684304	1.01878	3.32499	1.19242	8.80462	1.11798	4.27212	1.37909	2.01103	1.30731	1.31797	0.837311	1.79187	1.06062	1.16039	0.860641	1.22011	0.733107	2.34845	0.720563	1.59613	NA	NA	NA	NA	NA	NA	NA	NA	NA	NA	NA	NA	NA	NA	NA	NA	NA
O75563	SKAP2	Src kinase-associated phosphoprotein 2	NA	NA	NA	NA	NA	NA	NA	NA	NA	NA	NA	NA	NA	NA	NA	NA	NA	NA	NA	NA	NA	NA	NA	NA	NA	NA	NA	NA	NA	NA	1.88383	3.81441	1.6886	2.26492	1.18435	3.56552	3.10439	4.15513	1.1461	2.07083	0.963258	1.82107	0.987721	2.70531	0.994534	2.00526	1.02663
O75569	PRKRA	Interferon-inducible double-stranded RNA-dependent protein kinase activator A	0.831856	2.04246	0.624026	1.19038	0.558559	0.665045	0.477941	0.838799	0.51915	1.11066	0.528342	1.11667	0.499155	0.685161	0.511573	1.27515	0.515336	1.10059	0.658405	1.57858	0.764865	0.942248	0.616408	1.03102	0.694956	0.832378	0.440706	0.751816	0.620307	0.919132	0.488426	0.65258	0.45999	0.831056	0.33369	0.680941	0.473635	0.775274	0.444988	1.82993	0.834229	0.998119	0.786456	0.894572	0.698555	1.34913	0.668548
O75581	LRP6	Low-density lipoprotein receptor-related protein 6	1.73827	1.69872	1.1754	0.915677	1.74982	1.31777	1.85657	1.2952	1.61779	1.60646	1.86296	1.51904	1.27237	1.42041	1.44527	1.20012	1.78261	1.4123	1.72427	1.62136	2.16776	1.30494	2.06013	1.62869	1.83673	1.80687	1.51369	1.60678	1.90635	1.39797	2.53126	1.4236	1.75965	1.42689	1.38542	1.70486	2.00389	1.35887	1.89052	1.72515	2.1286	1.65062	1.75215	1.38342	1.65174	1.82534	1.93799
O75582	RPS6KA5	Ribosomal protein S6 kinase alpha-5	1.36444	1.66286	0.769119	3.154	0.763863	2.37457	0.839487	1.13245	1.04479	3.83634	1.09033	1.648	0.994185	1.84534	0.924831	3.61868	1.10771	3.13623	1.1762	2.61411	1.1828	2.0997	1.01326	2.09939	1.75822	1.5009	0.877718	1.16657	0.896797	1.79527	1.54544	3.67192	1.99138	3.52007	1.39554	2.3763	2.00785	5.56185	1.44594	4.50142	1.34687	1.56686	1.1748	2.33409	1.0615	1.39824	0.908598
O75586	MED6	Mediator of RNA polymerase II transcription subunit 6	0.224834	0.650994	0.23694	0.51946	0.269169	0.588645	0.229849	0.262557	0.329985	0.733818	0.472294	0.913659	0.428113	0.738882	0.520705	1.07834	0.662897	1.16321	0.830305	1.12122	0.441132	0.71026	0.456217	0.754222	0.436353	0.582802	0.317237	0.68967	0.437624	0.724402	0.690878	0.305958	0.508241	1.54153	0.448823	1.02586	0.704947	1.46418	0.600953	1.21508	0.379423	0.574611	0.40627	0.785246	0.346221	0.712923	0.42261
O75592	MYCBP2	E3 ubiquitin-protein ligase MYCBP2	1.06149	1.87672	0.861642	1.37139	1.29805	1.88608	1.44844	1.06485	1.35439	2.24399	0.935079	1.81035	0.703066	1.39248	0.762483	1.34437	1.00744	1.44878	1.04421	1.14749	0.852822	1.5528	0.802639	1.56434	0.886862	1.0109	0.674466	1.33785	0.809127	1.06726	0.773945	1.02132	0.67505	1.47402	0.701388	1.17863	0.970878	2.55308	0.822012	1.0099	0.898368	1.14302	0.800347	1.4195	0.842819	1.35224	0.924031
O75594	PGLYRP1	Peptidoglycan recognition protein 1	2.28343	3.52385	2.01935	7.29376	2.24775	1.91604	3.55973	7.51352	1.56469	6.70755	NA	NA	NA	NA	NA	NA	NA	NA	NA	NA	0.863803	0.573595	0.7581	0.995483	0.801562	0.863267	0.897336	0.850635	0.647037	0.979865	NA	NA	NA	NA	NA	NA	NA	NA	NA	NA	NA	NA	NA	NA	NA	NA	NA
O75607	NPM3	Nucleoplasmin-3	0.222273	0.615531	0.252485	0.918376	0.215866	0.296875	0.31027	0.424398	0.316202	0.597082	0.210903	0.362583	0.236821	0.297547	0.206259	0.304056	0.244374	0.362171	0.279613	0.312955	0.284544	0.50214	0.252597	0.37058	0.177847	0.39985	0.208304	0.470196	0.223922	0.629076	0.195757	0.326722	0.212273	0.486428	0.12589	0.262953	0.230559	0.335872	0.126383	0.434191	0.344813	0.411139	0.285363	0.468142	0.230765	0.44685	0.339967
O75608	LYPLA1	Acyl-protein thioesterase 1	0.456465	0.802592	0.378784	1.08712	0.402194	0.605798	0.473137	0.696439	0.605325	0.919954	0.510857	0.859056	0.363806	0.815585	0.380349	1.11589	0.573397	1.28843	0.53101	1.34655	0.656065	0.774886	0.580513	0.971939	0.463783	0.883631	0.409392	0.638783	0.532452	0.938061	0.610416	1.19552	0.716213	1.21803	0.508747	1.01931	0.724005	2.0944	0.482075	2.55954	0.543235	0.989493	0.557594	2.01308	0.625631	1.22607	0.779573
O75616	ERAL1	GTPase Era, mitochondrial	NA	NA	NA	NA	NA	NA	NA	NA	NA	NA	NA	NA	NA	NA	NA	NA	NA	NA	NA	NA	NA	NA	NA	NA	NA	NA	NA	NA	NA	NA	NA	NA	NA	NA	NA	NA	NA	NA	NA	NA	0.322086	0.345129	0.206107	0.498969	0.346069	0.527858	0.319372
O75628	REM1	GTP-binding protein REM 1	NA	NA	NA	NA	NA	NA	NA	NA	NA	NA	NA	NA	NA	NA	NA	NA	NA	NA	NA	NA	6.82885	2.64742	5.89774	2.45079	5.30004	3.12636	5.08446	5.60255	3.94818	4.0736	1.63629	0.643848	0.833644	1.05431	1.03925	1.39416	1.16037	1.24836	1.79678	1.52394	2.68237	1.57265	1.83356	1.29332	1.36914	1.48927	1.57551
O75635	SERPINB7	Serpin B7	1.33516	1.45122	0.267048	0.89162	1.20827	3.01514	1.79777	0.570513	2.88698	2.67997	6.8778	1.35058	0.489533	0.919999	1.7979	0.522173	1.78743	1.27601	1.26053	0.692282	NA	NA	NA	NA	NA	NA	NA	NA	NA	NA	NA	NA	NA	NA	NA	NA	NA	NA	NA	NA	NA	NA	NA	NA	NA	NA	NA
O75636	FCN3	Ficolin-3	NA	NA	NA	NA	NA	NA	NA	NA	NA	NA	1.76604	1.04547	3.19657	1.03664	2.15295	1.12818	3.94304	1.32171	1.86277	1.60768	1.65458	1.76871	3.70476	5.04607	2.87222	3.88682	1.60557	1.12168	1.61112	1.64347	NA	NA	NA	NA	NA	NA	NA	NA	NA	NA	1.92254	1.46003	2.67522	1.53574	3.05156	2.36153	1.24485
O75643	SNRNP200	U5 small nuclear ribonucleoprotein 200 kDa helicase	0.335328	0.944189	0.262075	0.700481	0.435908	0.517396	0.349423	0.496808	0.354343	0.851629	0.293133	0.539192	0.279392	0.584916	0.228425	0.673506	0.325435	0.8312	0.36834	0.714359	0.286141	0.623911	0.335756	0.755529	0.394453	0.599854	0.221238	0.566761	0.297162	0.543729	0.372516	0.60963	0.307632	0.838757	0.233925	0.552426	0.436419	0.745649	0.301494	0.746658	0.271146	0.538362	0.256244	0.720425	0.244392	0.594838	0.267363
O75648	TRMU	Mitochondrial tRNA-specific 2-thiouridylase 1	NA	NA	NA	NA	NA	NA	NA	NA	NA	NA	NA	NA	NA	NA	NA	NA	NA	NA	NA	NA	0.436134	0.692236	0.477381	0.955851	0.355959	0.736483	0.37411	0.658253	0.346987	0.762314	NA	NA	NA	NA	NA	NA	NA	NA	NA	NA	NA	NA	NA	NA	NA	NA	NA
O75663	TIPRL	TIP41-like protein	0.918718	0.741291	0.534071	1.35632	0.624167	0.692926	0.53947	0.911368	0.580159	1.14799	0.48194	0.826836	0.373492	0.712656	0.392046	0.793949	0.487021	0.907113	0.440453	0.726328	0.543783	0.740817	0.5491	0.874335	0.694058	0.814454	0.501	0.8527	0.770111	1.0491	0.575249	0.895452	0.521663	1.48681	0.493899	0.876532	0.630776	1.23728	0.540846	1.75411	0.563016	0.864441	0.479503	1.40972	0.464693	0.846055	0.502024
O75665	OFD1	Oral-facial-digital syndrome 1 protein	NA	NA	NA	NA	NA	NA	NA	NA	NA	NA	NA	NA	NA	NA	NA	NA	NA	NA	NA	NA	NA	NA	NA	NA	NA	NA	NA	NA	NA	NA	NA	NA	NA	NA	NA	NA	NA	NA	NA	NA	NA	NA	NA	NA	NA	NA	NA
O75674	TOM1L1	TOM1-like protein 1	0.378785	0.557436	0.28556	0.491359	0.336186	0.43531	0.304902	0.538696	0.391098	0.61295	NA	NA	NA	NA	NA	NA	NA	NA	NA	NA	NA	NA	NA	NA	NA	NA	NA	NA	NA	NA	NA	NA	NA	NA	NA	NA	NA	NA	NA	NA	0.298491	0.732088	0.306028	0.713017	0.339331	0.881784	0.359905
O75676	RPS6KA4	Ribosomal protein S6 kinase alpha-4	0.8345	2.76138	0.801153	2.27576	0.717239	1.59817	0.78268	1.24123	0.740849	2.4075	0.577819	1.72643	0.519741	1.62172	0.558668	2.22752	0.524136	2.04075	0.753186	1.70554	0.718111	1.66472	0.743172	1.27945	0.750056	1.1359	0.54189	1.21679	0.552708	1.66117	0.654916	1.55169	0.605135	1.68724	0.460511	1.1283	0.699839	1.49328	0.507023	0.645637	0.886972	1.30779	0.629267	1.61297	0.804765	1.38697	0.841809
O75683	SURF6	Surfeit locus protein 6	0.225625	0.438118	0.175083	0.418505	0.21498	0.251112	0.199817	0.269555	0.232402	0.249281	NA	NA	NA	NA	NA	NA	NA	NA	NA	NA	NA	NA	NA	NA	NA	NA	NA	NA	NA	NA	0.208589	0.356618	0.221435	0.466204	0.170269	0.295563	0.239696	0.331534	0.195021	0.648494	NA	NA	NA	NA	NA	NA	NA
O75688	PPM1B	Protein phosphatase 1B	0.772416	0.861857	0.416022	0.929891	0.672827	0.733677	1.19384	0.801896	0.552868	1.1557	0.508119	0.701606	0.379032	0.810488	0.366652	0.914118	0.526909	1.02926	0.521599	0.575666	0.654548	0.807011	1.01538	1.07551	0.806489	0.958366	0.808509	1.24394	1.13885	0.985731	0.0932999	0.102418	0.869575	0.919581	0.639167	0.97787	0.822105	1.08176	0.942872	1.97234	0.588991	0.609534	0.743434	1.30897	0.653727	1.13192	0.688835
O75689	ADAP1	Arf-GAP with dual PH domain-containing protein 1	NA	NA	NA	NA	NA	NA	NA	NA	NA	NA	NA	NA	NA	NA	NA	NA	NA	NA	NA	NA	NA	NA	NA	NA	NA	NA	NA	NA	NA	NA	1.60815	2.59534	1.59818	2.05681	1.04544	2.52817	1.49881	2.55303	1.21625	1.37426	NA	NA	NA	NA	NA	NA	NA
O75691	UTP20	Small subunit processome component 20 homolog	0.297366	0.676619	0.225732	0.770949	0.338305	0.378959	0.336028	0.385955	0.338204	0.62372	0.34118	0.472035	0.265352	0.396208	0.257836	0.552333	0.341793	0.565635	0.363169	0.539482	0.262476	0.360702	0.282277	0.406106	0.298193	0.435892	0.236223	0.43803	0.296928	0.491708	0.215578	0.297541	0.180564	0.411656	0.179006	0.366751	0.263232	0.391595	0.205504	0.363459	0.286858	0.296387	0.212641	0.385703	0.20819	0.427875	0.278163
O75694	NUP155	Nuclear pore complex protein Nup155	0.36191	0.82779	0.260339	0.632994	0.403771	0.529024	0.427169	0.606261	0.425506	0.915773	0.259146	0.582224	0.210664	0.547273	0.183785	0.570233	0.287795	0.695291	0.309679	0.573039	0.227245	0.484967	0.26817	0.593198	0.283059	0.44026	0.184664	0.454966	0.276205	0.499543	0.267905	0.480068	0.244231	0.58614	0.234613	0.487275	0.344972	0.68589	0.236078	0.713788	0.351553	0.516149	0.300999	0.608129	0.321115	0.672139	0.350199
O75695	RP2	Protein XRP2	1.22102	1.37746	0.854884	1.87695	1.0672	1.38183	1.28001	2.00105	1.26062	1.96619	1.17417	1.60579	0.823044	1.82954	0.734824	1.72591	1.20921	1.84953	1.10378	1.63939	1.14112	1.24724	1.14026	1.22507	0.890167	0.962254	0.976476	1.50579	0.873186	1.24517	1.16007	1.81043	0.929426	1.26352	0.782522	1.51983	1.14918	1.46959	0.84293	1.25676	0.788064	1.32455	0.816193	1.1593	0.732401	1.35154	0.949596
O75716	STK16	Serine/threonine-protein kinase 16	NA	NA	NA	NA	NA	NA	NA	NA	NA	NA	0.911601	0.976236	0.854227	0.861048	0.843446	0.852632	1.15375	1.13549	0.985203	0.766544	NA	NA	NA	NA	NA	NA	NA	NA	NA	NA	NA	NA	NA	NA	NA	NA	NA	NA	NA	NA	0.976348	0.545837	0.657115	0.593045	0.558045	0.601906	0.55728
O75717	WDHD1	WD repeat and HMG-box DNA-binding protein 1	0.233483	0.737267	0.188869	0.415972	0.224011	0.458114	0.215394	0.358414	0.23793	0.899615	0.221614	0.570673	0.153109	0.317789	0.1676	0.384644	0.260725	0.501379	0.236245	0.396781	0.189711	0.545854	0.230342	0.517273	0.210375	0.508731	0.159174	0.348946	0.189528	0.555031	0.230354	0.701239	0.212809	0.710102	0.155491	0.447254	0.239287	0.588087	0.163552	0.250597	0.221678	0.375771	0.233581	0.62253	0.214078	0.791328	0.237637
O75718	CRTAP	Cartilage-associated protein	0.5853	1.72413	0.382579	0.677648	0.494442	0.662552	0.416488	0.908318	0.482239	1.03061	0.477267	0.698111	0.281557	0.450734	0.67426	0.659245	0.550245	0.532012	0.328795	0.562905	0.679957	0.703294	0.499773	0.855276	0.423618	0.809673	0.351886	0.733023	0.420608	0.801468	0.629168	0.682593	0.540208	0.86022	0.462055	0.768924	0.645135	0.734946	0.401816	1.14526	0.267998	0.38039	0.335229	0.41738	0.285762	0.862695	0.309225
O75746	SLC25A12	Calcium-binding mitochondrial carrier protein Aralar1	1.17181	1.54225	0.677132	1.2552	1.25849	1.08821	1.00082	1.06017	1.00203	1.56566	1.29515	1.22114	0.823821	1.15052	0.999865	1.41636	1.00444	1.67644	1.01718	0.983349	0.870762	1.14147	0.971283	1.41139	1.25094	1.22685	1.07594	1.19235	1.24188	1.12981	0.945591	1.20728	0.78791	0.909181	0.847374	1.08934	1.08013	1.41925	0.76931	1.77825	0.826242	0.921317	0.735913	1.16404	0.854573	1.03478	0.762588
O75751	SLC22A3	Solute carrier family 22 member 3	1.13092	0.503775	0.683342	0.776524	2.07382	0.708769	0.725359	0.728519	1.25157	0.688064	2.52788	1.13373	1.45346	0.981188	2.06804	0.790108	1.86581	0.985132	1.9136	0.73261	0.812882	1.09641	1.11961	0.768622	0.99669	0.742159	1.02184	0.780352	1.35493	0.700592	NA	NA	NA	NA	NA	NA	NA	NA	NA	NA	NA	NA	NA	NA	NA	NA	NA
O75764	TCEA3	Transcription elongation factor A protein 3	NA	NA	NA	NA	NA	NA	NA	NA	NA	NA	NA	NA	NA	NA	NA	NA	NA	NA	NA	NA	NA	NA	NA	NA	NA	NA	NA	NA	NA	NA	NA	NA	NA	NA	NA	NA	NA	NA	NA	NA	NA	NA	NA	NA	NA	NA	NA
O75781	PALM	Paralemmin-1	0.856804	0.534009	1.10082	0.420337	0.513914	0.584717	0.536817	0.456317	0.827093	0.487572	0.504976	0.579669	0.737969	0.582291	0.733435	0.572896	0.55263	0.583056	0.877697	0.480079	1.30187	0.183352	0.998329	0.325404	0.866267	0.255206	0.469308	0.444746	0.416425	0.300863	0.796207	0.248493	0.961574	0.456762	0.260421	0.618974	0.481756	0.49287	0.984896	0.54543	1.17611	0.874561	0.955506	0.609669	0.654291	0.583633	0.75399
O75787	ATP6AP2	Renin receptor	NA	NA	NA	NA	NA	NA	NA	NA	NA	NA	0.540431	0.617694	0.542905	0.708828	0.576532	0.93522	0.438875	0.740394	0.467254	0.767798	0.779629	1.18311	0.810256	1.15392	0.695067	1.35143	0.602381	0.993273	0.669967	0.99297	NA	NA	NA	NA	NA	NA	NA	NA	NA	NA	0.488567	0.657193	0.435964	1.04779	0.438677	0.640672	0.530906
O75791	GRAP2	GRB2-related adapter protein 2	NA	NA	NA	NA	NA	NA	NA	NA	NA	NA	1.11529	1.73315	1.12343	5.31412	1.20044	2.79468	1.45397	2.77909	1.72537	1.06965	1.23476	3.84141	1.6017	2.03039	0.935753	1.52901	1.15738	5.87387	1.15043	2.28275	NA	NA	NA	NA	NA	NA	NA	NA	NA	NA	2.62455	6.45218	2.77859	6.9963	3.15017	2.99654	3.50397
O75792	RNASEH2A	Ribonuclease H2 subunit A	0.54081	0.822738	0.355033	0.823647	0.404369	0.655172	0.459124	0.65196	0.484825	1.03382	0.428791	0.720711	0.417625	0.690671	0.418706	1.08822	0.41628	0.849033	0.504046	0.729908	0.5439	0.94768	0.560517	0.747732	0.65821	0.668332	0.487419	0.848495	0.53508	0.811818	0.546687	0.7701	0.494675	1.05331	0.316534	0.788629	0.521971	0.937323	0.477	0.727946	0.422529	0.834406	0.328763	0.917282	0.328921	0.729169	0.302552
O75794	CDC123	Cell division cycle protein 123 homolog	0.299016	0.81401	0.21378	0.552669	0.289288	0.287636	0.263324	0.440319	0.266916	0.574136	0.447765	0.375068	0.409634	0.474605	0.387812	0.529273	0.373533	0.496198	0.417465	0.447042	0.271748	0.504488	0.297448	0.47496	0.309733	0.55311	0.29974	0.542082	0.36632	0.554659	0.194396	0.407905	0.237935	0.590036	0.172011	0.268945	0.276322	0.445047	0.138982	0.332004	0.287791	0.331285	0.171838	0.334345	0.193172	0.42022	0.243498
O75795	UGT2B17	UDP-glucuronosyltransferase 2B17	NA	NA	NA	NA	NA	NA	NA	NA	NA	NA	NA	NA	NA	NA	NA	NA	NA	NA	NA	NA	NA	NA	NA	NA	NA	NA	NA	NA	NA	NA	NA	NA	NA	NA	NA	NA	NA	NA	NA	NA	NA	NA	NA	NA	NA	NA	NA
O75808	CAPN15	Calpain-15	NA	NA	NA	NA	NA	NA	NA	NA	NA	NA	NA	NA	NA	NA	NA	NA	NA	NA	NA	NA	NA	NA	NA	NA	NA	NA	NA	NA	NA	NA	NA	NA	NA	NA	NA	NA	NA	NA	NA	NA	NA	NA	NA	NA	NA	NA	NA
O75817	POP7	Ribonuclease P protein subunit p20	0.259541	0.914516	0.238269	0.973748	0.272696	0.224129	0.21746	0.482618	0.195319	0.578892	0.23635	0.508182	0.377869	0.583087	0.233407	0.570884	0.234524	0.603013	0.283945	0.5819	0.318509	0.589048	0.381166	0.706278	0.342872	0.621929	0.236565	0.551567	0.218026	0.548582	0.569578	0.580035	0.607875	1.12481	0.422431	0.5258	0.600937	0.847014	0.370719	0.778031	0.361617	0.753677	0.140156	1.0806	0.298865	0.335308	0.310103
O75818	RPP40	Ribonuclease P protein subunit p40	0.198898	0.684196	0.194833	0.719864	0.259119	0.458477	0.271042	0.77317	0.290476	0.985371	0.217512	0.664423	0.196839	0.472454	0.229081	0.511062	0.283614	0.551577	0.284204	0.588371	0.352999	0.493824	0.420552	0.623825	0.362906	0.623944	0.267363	0.543794	0.334815	0.633524	0.323486	0.604283	0.305935	0.580693	0.195728	0.473812	0.406323	0.764866	0.228671	0.690651	0.1809	0.39271	0.31944	0.570642	0.225759	0.665739	0.254943
O75821	EIF3G	Eukaryotic translation initiation factor 3 subunit G	0.359621	0.566361	0.244023	0.510421	0.333747	0.404286	0.312761	0.365233	0.380535	0.511901	0.317399	0.683347	0.27845	0.43269	0.276896	0.596417	0.431995	0.489262	0.347819	0.530573	0.411858	0.578843	0.401535	0.533995	0.405196	0.49681	0.344174	0.567107	0.467559	0.626928	0.3872	0.346009	0.374558	0.650478	0.242352	0.490683	0.414516	0.736012	0.281488	0.582843	0.338481	0.473783	0.348259	0.644239	0.404241	0.627823	0.430435
O75822	EIF3J	Eukaryotic translation initiation factor 3 subunit J	0.147132	0.640531	0.184606	0.479727	0.121654	0.151552	0.14081	0.306606	0.187901	0.194445	0.14843	0.407727	0.144772	0.294754	0.146086	0.491505	0.16735	0.28644	0.144904	0.525548	0.263952	0.381427	0.19203	0.470028	0.190708	0.56241	0.17342	0.275642	0.177558	0.318873	0.0833705	0.165619	0.238326	0.464058	0.0489967	0.220005	0.0807873	0.452141	0.0988391	0.550588	0.19154	0.313216	0.164868	0.491357	0.163713	0.338848	0.176918
O75828	CBR3	Carbonyl reductase [NADPH] 3	1.70071	1.34841	1.78108	2.63185	1.44437	2.23703	1.45469	3.21508	1.8114	2.58474	1.30525	2.00295	0.867446	1.2424	1.06708	3.62818	1.35714	2.0821	1.14453	1.19014	1.52896	2.71381	1.27441	2.65094	1.51633	1.71319	0.921193	1.2821	1.16075	2.18469	1.44093	1.45189	1.03387	2.19779	1.24961	3.11002	1.7069	3.93821	0.920623	2.26191	1.34394	3.00742	0.954648	4.39117	1.48977	3.23014	1.31859
O75830	SERPINI2	Serpin I2	0.71326	1.3259	0.909812	4.09091	0.890327	1.05733	1.27166	2.72167	1.05594	1.96546	1.70329	4.73582	1.36189	2.34557	1.07857	3.08508	2.12873	2.45375	2.36677	5.53194	1.50144	1.68975	1.64865	1.85035	1.02608	1.67672	1.06013	2.01517	0.987155	2.91675	1.2962	3.01646	1.81324	1.83564	1.2335	1.67984	1.83077	2.08569	0.909464	1.76758	0.378925	1.2458	0.51214	2.02302	0.596918	1.36916	0.731913
O75832	PSMD10	26S proteasome non-ATPase regulatory subunit 10	0.712549	0.753316	0.488976	1.00502	0.640398	0.823873	0.582089	0.825352	0.58685	1.12963	0.642292	0.762836	0.457433	0.865697	0.489942	1.13311	0.605431	1.1419	0.557307	1.03454	0.721181	0.909177	0.633653	1.09544	0.694756	0.805822	0.626826	0.866993	0.784797	0.916378	0.65663	1.02403	0.610424	1.23883	0.497838	0.941476	0.673218	1.04303	0.660708	1.21025	0.481544	0.878168	0.42668	0.921686	0.475128	0.889451	0.482618
O75840	KLF7	Krueppel-like factor 7	0.322836	0.849946	0.384646	0.526982	0.316697	0.578435	0.39691	0.248153	0.225639	0.933429	NA	NA	NA	NA	NA	NA	NA	NA	NA	NA	0.286952	0.485054	0.432544	0.496758	0.769984	0.525272	0.402036	0.396374	0.485494	0.485934	NA	NA	NA	NA	NA	NA	NA	NA	NA	NA	NA	NA	NA	NA	NA	NA	NA
O75843	AP1G2	AP-1 complex subunit gamma-like 2	1.06161	3.43349	1.02319	3.20575	0.96922	1.60127	1.52502	3.37183	1.4868	1.99407	1.8987	1.09153	1.66802	3.23503	1.19928	2.81043	2.15169	2.92805	1.87801	2.82827	1.16952	2.02987	1.30099	2.53786	0.626617	1.39736	0.659817	2.50281	0.70624	2.80437	1.21599	1.12431	1.02629	1.52173	0.640157	1.19176	1.31993	1.70507	0.811208	2.51196	1.20112	1.23571	1.3213	1.34278	0.916189	1.1783	1.13578
O75844	ZMPSTE24	CAAX prenyl protease 1 homolog	0.701872	1.36602	0.411072	1.17076	0.678737	0.980799	0.805044	1.23718	0.80287	1.32085	0.682808	0.818041	0.687905	0.968729	0.591671	1.16941	0.908382	1.30527	0.780786	1.01093	0.570679	0.989613	0.45903	1.2822	0.577433	0.664137	0.365383	0.937165	0.461102	1.11361	0.55922	0.977932	0.496776	0.8246	0.466426	0.947255	0.554752	0.915597	0.448735	1.22017	0.403447	0.69989	0.456216	1.16838	0.452006	0.914054	0.501864
O75864	PPP1R37	Protein phosphatase 1 regulatory subunit 37	1.59591	0.923485	0.670158	0.888122	0.706812	0.485289	0.588691	0.803065	0.837235	0.764967	0.430133	1.17433	0.56139	1.08153	0.444062	1.32784	0.443552	1.24247	0.712176	1.17289	NA	NA	NA	NA	NA	NA	NA	NA	NA	NA	1.52364	1.58412	1.24289	1.30822	0.999883	1.09381	1.09461	1.574	1.19417	1.40687	0.78548	1.35398	0.845392	1.81299	0.778234	1.70093	0.951736
O75874	IDH1	Isocitrate dehydrogenase [NADP] cytoplasmic	0.756031	0.616716	0.552401	0.798242	0.565393	0.800461	0.7162	1.09771	0.826061	1.17979	0.74663	0.88472	0.562824	1.14373	0.606344	1.06538	0.914334	1.39489	0.895347	1.35718	1.2346	0.814769	1.17086	1.17557	0.824143	1.19571	0.913946	1.16422	0.854959	1.18816	1.15742	1.06292	1.02922	0.98047	0.711865	1.00609	1.19486	1.58201	0.919897	6.8058	1.01354	1.22271	0.751613	1.98646	1.03909	1.56131	0.888556
O75879	GATB	Glutamyl-tRNA(Gln) amidotransferase subunit B, mitochondrial	NA	NA	NA	NA	NA	NA	NA	NA	NA	NA	NA	NA	NA	NA	NA	NA	NA	NA	NA	NA	NA	NA	NA	NA	NA	NA	NA	NA	NA	NA	NA	NA	NA	NA	NA	NA	NA	NA	NA	NA	NA	NA	NA	NA	NA	NA	NA
O75880	SCO1	Protein SCO1 homolog, mitochondrial	0.295143	0.766719	0.196566	0.539006	0.328426	0.420152	0.295623	0.416433	0.266947	0.499904	0.307328	0.37228	0.241875	0.544401	0.270278	0.704165	0.344015	0.876263	0.35833	0.901388	0.339959	0.472177	0.302771	0.639937	0.35196	0.339841	0.275236	0.538025	0.339009	0.425884	0.37889	0.428869	0.308231	0.447836	0.218772	0.449725	0.300055	0.568589	0.207224	0.840505	0.309037	0.431678	0.245383	0.877817	0.257082	0.487293	0.30984
O75881	CYP7B1	Cytochrome P450 7B1	1.54581	2.80395	1.68726	2.17862	1.79608	4.8301	3.18497	2.20155	3.4018	4.33086	1.54562	2.38649	1.33189	1.97401	1.37583	2.96242	2.42644	3.24242	1.93051	0.906128	3.58071	6.23983	3.83583	4.94534	1.94419	3.78906	2.32095	3.2974	1.72002	3.21468	3.12524	3.26947	2.86599	2.14054	1.51413	2.57949	4.47916	5.86583	1.40007	1.51279	1.24417	2.0868	1.44794	3.26921	1.55455	2.58504	1.72026
O75882	ATRN	Attractin	NA	NA	NA	NA	NA	NA	NA	NA	NA	NA	1.33367	0.634574	0.818882	0.688079	0.881763	0.848877	1.31619	1.00118	1.04381	0.642928	1.69706	1.03809	1.37339	1.35207	1.93953	1.72943	1.46594	1.46206	1.0628	1.01793	3.13619	1.40529	1.35262	1.01851	1.31868	1.17042	2.28305	1.01613	1.05211	1.09173	1.90125	0.990859	1.38733	1.11217	1.50285	1.23367	1.57879
O75884	RBBP9	Putative hydrolase RBBP9	1.29763	0.75175	0.873078	0.665914	0.96557	0.891106	0.809114	0.900641	1.04457	1.14241	0.689408	0.824045	0.600155	0.771731	0.579712	0.925803	0.720588	0.860973	0.715483	0.863327	1.12881	1.10513	1.00644	0.808529	1.07537	0.916362	0.91201	1.11923	1.2846	1.50801	1.13133	1.30518	1.02117	1.64073	0.748915	2.03003	1.32913	2.58004	0.927914	2.69482	0.716796	0.994389	0.585862	1.12725	0.637589	0.948929	0.666339
O75886	STAM2	Signal transducing adapter molecule 2	0.766135	0.853283	0.446612	0.775949	0.702466	0.735387	0.509435	0.697	0.657743	0.758929	0.708246	1.09654	0.57131	0.71887	0.534278	1.01705	0.662163	1.0693	0.709601	1.43066	0.690787	1.28054	0.679952	1.23963	0.893946	1.09793	0.550199	0.935968	0.733803	1.56424	0.581276	0.622888	0.429398	1.0051	0.252438	0.895149	0.725265	1.20562	0.474476	1.50155	0.754041	0.831531	0.777472	1.24234	0.722445	1.02085	0.753745
O75891	ALDH1L1	Cytosolic 10-formyltetrahydrofolate dehydrogenase	1.49825	3.80506	1.00279	4.76636	1.41532	1.02065	1.39617	1.20117	1.93149	1.71065	2.12855	1.45302	1.4152	1.54295	1.36105	9.58302	1.78745	2.16837	2.31536	13.7583	2.4524	4.7903	1.90854	3.61333	1.88121	1.2481	1.24229	1.41725	1.1722	3.11222	2.15849	2.43347	2.09883	2.63834	1.54304	2.64814	1.99174	5.1871	1.31121	4.24801	1.06751	6.60493	1.18564	7.56969	0.999653	1.21018	1.31531
O75907	DGAT1	Diacylglycerol O-acyltransferase 1	0.908827	2.19655	0.671079	1.84293	0.882752	1.40745	1.35138	1.30345	0.960924	1.78493	0.828897	1.67189	0.793225	1.79065	0.879649	2.32182	1.13089	2.21998	1.09493	2.07651	0.947102	1.5242	0.939537	1.86684	0.842387	1.26495	0.65713	1.25084	0.702406	1.86474	0.641518	1.15077	0.710498	1.37028	0.50124	1.02888	0.746916	1.33084	0.624555	1.50308	0.626531	1.02099	0.663885	1.73734	0.671029	1.12611	0.704975
O75909	CCNK	Cyclin-K	0.276893	0.982091	0.255856	0.930439	0.306054	0.558718	0.305645	0.611855	0.396198	0.898384	0.275144	0.634954	0.23137	0.51405	0.2931	0.497129	0.369745	0.562847	0.38077	0.528023	0.379506	0.72829	0.381918	0.808954	0.386106	0.637958	0.248012	0.646469	0.270938	0.699788	0.271794	0.52768	0.287803	0.840784	0.188156	0.518466	0.274805	0.960369	0.248598	0.828704	0.590919	0.609184	0.451157	0.896768	0.60755	0.810323	0.391888
O75911	DHRS3	Short-chain dehydrogenase/reductase 3	0.98966	1.46178	0.692383	2.72803	0.649269	4.74359	1.27071	2.6846	1.05878	3.90375	1.21028	2.1467	0.886934	3.21952	0.891386	3.75343	1.28449	6.92615	1.49328	1.7633	0.607703	1.86438	1.03872	2.24508	0.600578	1.63271	0.680204	0.830614	0.669559	2.37737	0.671109	1.17957	0.975396	1.24471	0.517803	1.71157	0.739063	1.84305	0.46231	0.637593	0.480054	1.73149	0.424805	2.40514	0.705082	2.90155	0.853439
O75915	ARL6IP5	PRA1 family protein 3	0.418259	0.424821	0.218393	0.523928	0.258538	0.511081	0.28292	0.362566	0.320503	0.41677	0.538272	0.542121	0.363534	0.763764	0.525524	0.830313	0.506708	0.69954	0.508846	0.50759	0.581309	0.866183	0.48399	0.653268	0.467027	0.679369	0.488152	0.904086	0.411254	0.704249	0.607507	0.765319	0.561622	0.562859	0.458063	0.73328	0.629703	0.816625	0.473255	0.944655	0.201021	0.477311	0.206313	0.481547	0.215074	0.353338	0.27147
O75923	DYSF	Dysferlin	1.95672	1.65648	1.16958	2.62836	1.68453	1.63559	1.21853	2.38918	1.29083	2.29943	3.0975	1.80066	1.80359	2.7155	1.95775	2.1942	1.82051	3.5347	1.69188	2.54054	1.51128	1.81425	1.89308	1.75133	2.01907	1.52343	2.57506	1.78771	2.28089	1.85899	2.07443	2.5792	1.64919	1.88521	2.70649	1.48164	2.78801	2.04925	1.39172	2.68078	1.61055	1.69004	1.42668	1.91614	1.85292	2.02297	1.592
O75925	PIAS1	E3 SUMO-protein ligase PIAS1	NA	NA	NA	NA	NA	NA	NA	NA	NA	NA	0.686618	0.806586	0.44066	0.70357	0.53605	0.994178	0.549738	1.08361	0.6455	0.984347	0.395523	0.952793	0.485821	0.927263	0.686291	0.710419	0.452993	0.991174	0.742335	0.798162	3.89844	1.12896	5.08618	0.924003	2.00481	1.42519	5.34644	1.41547	2.51531	0.655439	0.67936	0.758502	0.562686	1.19665	0.577342	1.09941	0.690573
O75928	PIAS2	E3 SUMO-protein ligase PIAS2	NA	NA	NA	NA	NA	NA	NA	NA	NA	NA	0.686618	0.806586	0.44066	0.70357	0.53605	0.994178	0.549738	1.08361	0.6455	0.984347	0.395523	0.952793	0.485821	0.927263	0.686291	0.710419	0.452993	0.991174	0.742335	0.798162	3.89844	1.12896	5.08618	0.924003	2.00481	1.42519	5.34644	1.41547	2.51531	0.655439	0.67936	0.758502	0.562686	1.19665	0.577342	1.09941	0.690573
O75934	BCAS2	Pre-mRNA-splicing factor SPF27	0.334001	1.03039	0.284385	0.834566	0.325991	0.435636	0.343519	0.460444	0.362696	0.872874	0.280755	0.695092	0.248617	0.606095	0.245906	0.807059	0.378242	0.931558	0.375026	0.899888	0.441449	0.890577	0.47844	0.913888	0.540257	0.619981	0.54087	0.790237	0.716369	0.846505	0.494859	0.619775	0.384443	1.01297	0.28919	0.666744	0.542913	1.0074	0.296195	0.966369	0.329481	0.726806	0.274236	0.96569	0.299145	0.794577	0.336629
O75935	DCTN3	Dynactin subunit 3	0.780565	0.839087	0.548608	1.04587	0.663647	0.971324	0.495095	1.0953	0.583295	1.08928	0.587595	0.596732	0.374611	0.549355	0.518744	0.842941	0.472827	0.695394	0.44514	0.563483	0.558079	0.835361	0.550498	0.790334	0.779788	0.70077	0.556918	0.957847	0.719386	0.904903	0.577284	0.878305	0.641698	0.874598	0.549028	0.925234	0.73297	0.849035	0.611764	0.913554	0.814489	0.891048	0.575197	0.837729	0.709085	0.92159	0.744717
O75936	BBOX1	Gamma-butyrobetaine dioxygenase	NA	NA	NA	NA	NA	NA	NA	NA	NA	NA	0.924517	1.28372	0.940417	0.652096	0.601523	1.01188	1.32218	0.653491	1.12218	4.77363	NA	NA	NA	NA	NA	NA	NA	NA	NA	NA	NA	NA	NA	NA	NA	NA	NA	NA	NA	NA	NA	NA	NA	NA	NA	NA	NA
O75937	DNAJC8	DnaJ homolog subfamily C member 8	0.202245	0.220755	0.114622	0.429632	0.303256	0.354873	0.205764	0.317741	0.183586	0.516035	0.200887	0.2801	0.174357	0.340536	0.167846	0.337548	0.201909	0.554287	0.247987	0.273464	0.21082	0.31624	0.194481	0.356849	0.276936	0.236119	0.130086	0.330422	0.186737	0.387113	0.183289	0.402218	0.154062	0.355757	0.133674	0.300538	0.199186	0.415114	0.191894	0.243678	0.162786	0.27868	0.126426	0.3269	0.130759	0.466386	0.145386
O75940	SMNDC1	Survival of motor neuron-related-splicing factor 30	0.165151	0.349391	0.156705	0.564948	0.0882298	0.14968	0.0927376	0.356993	0.114083	0.326052	0.15766	0.253807	0.145512	0.260562	0.137162	0.294828	0.152022	0.235787	0.181901	0.276581	0.281719	0.846247	0.392203	0.815658	0.254411	0.822962	0.165178	0.468442	0.173148	0.778329	0.149375	0.353749	0.235201	0.664071	0.0889943	0.259227	0.121129	0.548471	0.150765	0.678665	0.15118	0.35172	0.177798	0.578747	0.194239	0.599527	0.166017
O75947	ATP5PD	ATP synthase subunit d, mitochondrial	0.272921	0.587787	0.209533	0.624768	0.129767	0.204033	0.154609	0.385713	0.253665	0.794098	0.16614	0.473072	0.201721	0.457818	0.153826	0.951768	0.264227	0.983937	0.278509	0.775501	0.418089	0.970318	0.320465	1.3849	0.467089	0.397108	0.295892	0.783567	0.250414	1.03548	0.497443	0.554122	0.498224	0.622506	0.238665	0.859889	0.475731	1.09631	0.347873	1.45542	0.358322	0.772528	0.265264	0.894507	0.370155	0.622146	0.401269
O75954	TSPAN9	Tetraspanin-9	NA	NA	NA	NA	NA	NA	NA	NA	NA	NA	1.82187	1.37183	1.07016	1.14146	1.49772	1.25666	1.3732	1.62656	1.71696	0.985143	NA	NA	NA	NA	NA	NA	NA	NA	NA	NA	NA	NA	NA	NA	NA	NA	NA	NA	NA	NA	NA	NA	NA	NA	NA	NA	NA
O75955	FLOT1	Flotillin-1	0.692596	1.33267	0.598136	0.972417	0.3988	0.520079	0.407411	0.857656	0.63245	0.714265	0.757269	1.14492	0.700107	0.871977	0.619797	1.26742	0.695109	1.85555	0.73663	1.36369	0.77187	1.42036	0.962893	1.33134	0.997091	1.29957	0.718228	1.23325	0.660095	0.880222	0.733583	0.556503	0.684607	1.56009	0.48544	0.949372	0.801723	1.03073	0.690453	1.43017	0.865231	1.05408	0.617029	1.17942	0.782579	1.08995	0.753911
O75962	TRIO	Triple functional domain protein	0.505209	0.712131	0.365659	0.396689	0.661182	0.483815	0.411708	0.459759	0.392655	0.687601	0.430986	0.513408	0.353661	0.36885	0.344287	0.458879	0.422739	0.702328	0.405604	0.478139	0.284664	0.501263	0.346381	0.415858	0.565861	0.485393	0.288182	0.540808	0.45592	0.505022	0.469644	0.454592	0.447037	0.598713	0.34688	0.500104	0.440961	0.523143	0.359352	0.686056	0.281767	0.323025	0.259309	0.45206	0.265564	0.485321	0.254397
O75964	ATP5MG	ATP synthase subunit g, mitochondrial	0.831047	1.05561	0.41539	0.823024	0.677186	0.888673	0.512482	0.74878	0.583734	1.15571	0.704837	1.01448	0.456736	0.939508	0.530957	1.26595	0.55546	1.52374	0.58015	1.04676	0.705926	0.967311	0.656269	1.30037	0.688085	0.769058	0.574847	1.01953	0.771803	0.958391	1.15127	1.00469	1.08772	1.07036	0.929614	1.07416	1.33175	1.16504	0.763258	1.29513	0.50195	0.763662	0.333137	0.658371	0.421797	0.887937	0.49098
O75970	MPDZ	Multiple PDZ domain protein	0.712185	1.02057	0.389534	0.684611	0.58183	0.599775	0.522313	0.72717	0.472943	0.790163	NA	NA	NA	NA	NA	NA	NA	NA	NA	NA	NA	NA	NA	NA	NA	NA	NA	NA	NA	NA	0.412641	0.652581	0.539049	0.98157	0.34248	0.637613	0.725384	0.881631	0.558293	1.37949	NA	NA	NA	NA	NA	NA	NA
O75976	CPD	Carboxypeptidase D	0.39237	0.707952	0.277335	0.959354	0.334588	0.417848	0.424491	0.601885	0.456697	0.698775	0.438779	0.459281	0.403281	0.485918	0.401578	0.817292	0.484142	0.881493	0.502012	0.785412	0.420894	0.306213	0.409005	0.614886	0.237841	0.360311	0.242257	0.394022	0.284708	0.829973	0.401623	0.49452	0.427363	0.634471	0.320397	0.569633	0.490779	0.766704	0.35557	1.68896	0.279698	0.527503	0.347991	0.625759	0.295007	0.564636	0.330154
O75995	SASH3	SAM and SH3 domain-containing protein 3	1.57291	1.10193	0.917981	1.15702	1.58006	0.956081	2.27208	1.3448	1.61185	1.20284	0.947681	1.30487	0.65218	1.61985	0.965584	1.40135	1.18483	1.13047	1.15135	1.03163	0.785204	1.41086	0.886937	1.21231	0.851968	1.42774	0.704845	1.69147	0.694728	1.34203	1.10311	1.25747	0.892611	1.22417	0.832323	1.27313	1.2406	1.54028	0.84003	1.161	0.914077	1.79211	0.893542	2.10811	0.950162	1.63989	1.24454
O76003	GLRX3	Glutaredoxin-3	0.266496	0.461985	0.215984	0.899901	0.208693	0.479462	0.17721	0.479497	0.259397	1.0274	0.300397	0.754238	0.21807	0.391088	0.191648	0.588811	0.309885	0.5496	0.232414	0.410187	0.373995	0.876636	0.28418	0.59152	0.217021	0.518647	0.276327	0.679887	0.273668	1.16394	0.306324	0.935518	0.358051	0.88181	0.250289	0.597504	0.361338	0.934097	0.219282	0.594431	0.247494	0.42917	0.293567	0.67494	0.282561	0.815608	0.377781
O76011	KRT34	Keratin, type I cuticular Ha4	NA	NA	NA	NA	NA	NA	NA	NA	NA	NA	NA	NA	NA	NA	NA	NA	NA	NA	NA	NA	NA	NA	NA	NA	NA	NA	NA	NA	NA	NA	NA	NA	NA	NA	NA	NA	NA	NA	NA	NA	NA	NA	NA	NA	NA	NA	NA
O76021	RSL1D1	Ribosomal L1 domain-containing protein 1	0.148159	0.327276	0.114097	0.311898	0.141246	0.154628	0.147729	0.251156	0.151096	0.299006	0.231229	0.47155	0.22119	0.358534	0.210574	0.433423	0.273422	0.461007	0.248479	0.600894	0.198337	0.333373	0.204023	0.525991	0.154337	0.364347	0.132547	0.331635	0.184947	0.458108	0.224227	0.225337	0.142738	0.272722	0.10852	0.177622	0.211525	0.186973	0.13159	0.285604	0.0769579	0.119607	0.080582	0.146614	0.0979709	0.16118	0.119056
O76024	WFS1	Wolframin	1.98176	0.995608	0.859297	0.807186	2.13244	1.30948	1.10392	0.942252	1.12075	1.2737	1.25766	0.882673	0.925529	0.957671	1.17467	1.37279	1.01941	1.17213	1.30851	0.708097	2.07054	1.12151	1.79641	0.89656	1.46242	0.891365	1.60309	1.40216	1.6424	0.861983	1.29008	0.709407	1.19176	0.775121	1.14662	0.991833	1.3348	0.935286	1.18177	3.4969	1.67688	1.28933	1.12331	1.0196	1.24188	0.86875	1.04879
O76031	CLPX	ATP-dependent Clp protease ATP-binding subunit clpX-like, mitochondrial	0.293575	0.857123	0.232323	0.520514	0.211745	0.367869	0.218956	0.439258	0.237402	0.546015	0.234115	0.464306	0.208977	0.287599	0.210188	0.584137	0.258708	0.470576	0.233881	0.486623	0.31172	0.461844	0.29481	0.335657	0.248612	0.516976	0.229299	0.411346	0.243824	0.419475	0.239157	0.327753	0.279229	0.45356	0.161566	0.388373	0.23116	0.606852	0.189249	0.541034	0.237859	0.382793	0.242435	0.616854	0.219718	0.461466	0.293867
O76041	NEBL	Nebulette	NA	NA	NA	NA	NA	NA	NA	NA	NA	NA	0.775904	0.502398	0.556654	0.715002	0.666802	0.865002	0.484949	1.08214	0.699079	0.507833	0.678322	0.305176	0.699826	1.11773	0.415254	0.402532	0.365683	0.259192	0.411989	0.306945	0.299618	0.235434	0.364534	0.595356	0.266287	0.380429	0.281013	1.04237	0.226552	0.736845	0.0639889	0.200564	0.106997	1.13822	0.141123	0.250903	0.105774
O76054	SEC14L2	SEC14-like protein 2	NA	NA	NA	NA	NA	NA	NA	NA	NA	NA	NA	NA	NA	NA	NA	NA	NA	NA	NA	NA	NA	NA	NA	NA	NA	NA	NA	NA	NA	NA	0.900602	2.28958	0.957413	1.60014	1.16758	2.57621	0.975172	2.74201	1.06521	2.17733	NA	NA	NA	NA	NA	NA	NA
O76061	STC2	Stanniocalcin-2	NA	NA	NA	NA	NA	NA	NA	NA	NA	NA	NA	NA	NA	NA	NA	NA	NA	NA	NA	NA	NA	NA	NA	NA	NA	NA	NA	NA	NA	NA	NA	NA	NA	NA	NA	NA	NA	NA	NA	NA	NA	NA	NA	NA	NA	NA	NA
O76062	TM7SF2	Delta(14)-sterol reductase TM7SF2	NA	NA	NA	NA	NA	NA	NA	NA	NA	NA	1.09482	0.502038	0.704973	0.848833	1.19694	1.11277	1.15398	1.44232	1.27975	1.82191	0.973462	0.661162	0.813136	1.30178	1.37312	0.640243	0.592103	0.788686	0.91287	0.700456	NA	NA	NA	NA	NA	NA	NA	NA	NA	NA	0.753761	0.803094	0.466184	0.77522	0.796208	1.0066	0.677357
O76070	SNCG	Gamma-synuclein	0.417497	0.409169	0.30019	0.167135	0.249776	0.211674	0.118708	0.631816	0.234518	0.154116	0.243534	0.187202	0.313704	0.183016	0.365184	0.266463	0.184137	0.24729	0.269893	0.321843	0.250109	0.242711	0.398281	0.286659	1.2604	0.340209	0.739561	0.247635	0.338484	0.766866	0.391884	0.191677	0.408343	0.214683	0.308339	0.288532	0.346488	0.912474	0.534184	0.107075	0.880897	0.203201	0.525964	0.191973	0.595622	0.179383	0.411044
O76071	CIAO1	Probable cytosolic iron-sulfur protein assembly protein CIAO1	0.185701	0.537258	0.134075	0.912933	0.168103	0.397467	0.14949	0.633	0.210811	0.753657	0.458454	0.58381	0.349176	0.727087	0.308412	0.63274	0.371012	0.67185	0.41013	0.594559	0.504451	1.23046	0.433295	1.15697	0.387024	0.18005	0.497039	1.37321	0.44179	1.5021	0.495142	1.22642	0.456908	0.973074	0.398367	1.00009	0.667534	1.35125	0.33895	0.935401	0.368548	0.798862	0.291983	1.13789	0.414537	1.0937	0.530063
O76074	PDE5A	cGMP-specific 3',5'-cyclic phosphodiesterase	2.5476	1.4265	1.78842	1.22694	1.75594	1.44842	2.80313	1.05875	1.85124	1.84864	2.2718	1.97153	3.62636	2.59805	2.42859	2.60329	2.39997	2.97771	4.17757	2.06063	2.54271	1.61072	3.12174	1.63204	2.26154	2.16663	2.52781	1.91867	1.53273	1.66458	2.69789	1.35347	1.13306	1.07743	2.0891	2.09993	3.0245	1.85984	1.64265	1.75728	3.04631	2.0403	1.67793	1.4398	2.50709	1.69813	1.64197
O76076	WISP2	WNT1-inducible-signaling pathway protein 2	1.15164	0.857969	2.77312	0.708439	4.87092	1.19308	4.85885	0.475474	4.60132	1.80964	NA	NA	NA	NA	NA	NA	NA	NA	NA	NA	1.8275	1.39496	2.6719	1.41305	1.3277	1.34659	1.44603	1.38757	1.63752	1.29592	1.9502	1.4386	1.4373	1.10636	2.39003	1.37399	1.62976	1.79492	7.59653	2.14859	4.56061	1.79091	2.05818	1.25326	1.80191	1.11627	3.75443
O76081	RGS20	Regulator of G-protein signaling 20	NA	NA	NA	NA	NA	NA	NA	NA	NA	NA	NA	NA	NA	NA	NA	NA	NA	NA	NA	NA	0.780768	1.05612	0.835416	0.783317	0.68436	0.871367	0.75786	1.25641	0.585083	0.719733	NA	NA	NA	NA	NA	NA	NA	NA	NA	NA	NA	NA	NA	NA	NA	NA	NA
O76094	SRP72	Signal recognition particle subunit SRP72	0.275936	0.652545	0.213723	0.502491	0.270442	0.325654	0.236752	0.384636	0.289466	0.420337	0.294529	0.425679	0.242039	0.449506	0.261149	0.927069	0.348247	0.579625	0.35741	0.730629	0.456927	0.633412	0.385009	0.675177	0.345377	0.464774	0.253236	0.676049	0.327089	0.635239	0.376974	0.532795	0.385415	0.604101	0.263965	0.547544	0.455691	0.883861	0.305437	0.922602	0.302391	0.650159	0.244777	0.714289	0.253765	0.592767	0.327452
O76095	JTB	Protein JTB	0.542937	2.15615	0.465708	2.40223	0.512917	1.53714	0.813692	2.97961	0.781284	1.99806	0.611434	1.29445	0.38128	1.25333	0.624966	1.25076	0.674878	1.57824	0.563711	1.09162	0.681939	0.799412	0.519023	1.24835	0.407581	0.960379	0.318656	1.09647	0.376162	1.3446	0.634227	1.80908	0.881321	2.07728	0.446601	1.20853	0.846504	1.06356	0.36709	4.45599	NA	NA	NA	NA	NA	NA	NA
O94760	DDAH1	N(G),N(G)-dimethylarginine dimethylaminohydrolase 1	0.624322	0.238071	0.368332	0.483322	0.420521	0.251431	0.933489	0.239413	0.578403	0.331037	1.49195	0.545386	0.848167	0.678544	0.913437	0.700722	0.884089	1.15053	1.15817	0.659455	1.52522	0.72221	1.14532	0.761392	0.875529	0.669035	1.09333	0.75192	1.10054	0.659096	0.922262	0.400382	0.614742	0.388509	0.795991	0.588163	0.839096	0.466516	0.84533	2.74898	0.818492	0.842486	0.570656	0.553722	0.603811	0.406928	0.578767
O94762	RECQL5	ATP-dependent DNA helicase Q5	0.0415465	0.0528885	0.0314219	0.0615938	0.0279795	0.0217101	0.0279444	0.0527547	0.0334721	0.0367998	0.038549	0.0266717	0.0288238	0.0621186	0.0374001	0.0648423	0.0437605	0.0550581	0.0381024	0.0732832	0.0633242	0.0840564	0.0780707	0.115456	0.0742348	0.104775	0.0684508	0.115191	0.101514	0.0827323	0.260596	0.243842	0.214128	0.437318	0.205002	0.319176	0.31662	0.393215	0.267137	0.34494	0.111464	0.188619	0.0987634	0.149998	0.094045	0.165848	0.0610301
O94763	URI1	Unconventional prefoldin RPB5 interactor 1	NA	NA	NA	NA	NA	NA	NA	NA	NA	NA	NA	NA	NA	NA	NA	NA	NA	NA	NA	NA	NA	NA	NA	NA	NA	NA	NA	NA	NA	NA	NA	NA	NA	NA	NA	NA	NA	NA	NA	NA	0.447921	0.754848	0.365481	0.731682	0.424395	0.705314	0.45626
O94766	B3GAT3	Galactosylgalactosylxylosylprotein 3-beta-glucuronosyltransferase 3	NA	NA	NA	NA	NA	NA	NA	NA	NA	NA	0.447437	0.735022	0.339548	0.702429	0.391424	0.751059	0.457941	0.773753	0.526066	0.579277	NA	NA	NA	NA	NA	NA	NA	NA	NA	NA	NA	NA	NA	NA	NA	NA	NA	NA	NA	NA	NA	NA	NA	NA	NA	NA	NA
O94768	STK17B	Serine/threonine-protein kinase 17B	NA	NA	NA	NA	NA	NA	NA	NA	NA	NA	1.23439	3.7313	1.87424	7.72301	1.29555	4.62235	1.64079	3.93494	2.87012	4.34294	NA	NA	NA	NA	NA	NA	NA	NA	NA	NA	NA	NA	NA	NA	NA	NA	NA	NA	NA	NA	NA	NA	NA	NA	NA	NA	NA
O94776	MTA2	Metastasis-associated protein MTA2	0.379287	0.875053	0.297751	1.00902	0.406195	0.717911	0.399997	0.73133	0.405339	1.07493	0.403862	0.837535	0.357231	0.750506	0.335882	0.909199	0.419605	0.868685	0.452284	0.775715	0.412809	1.06993	0.455664	0.858026	0.493659	0.810193	0.310337	0.803844	0.45033	0.83471	0.458848	0.839876	0.390352	1.17158	0.375074	0.737329	0.53046	0.935913	0.363521	0.972358	0.391329	0.708729	0.356042	1.03634	0.405232	1.05286	0.433582
O94788	ALDH1A2	Retinal dehydrogenase 2	4.76629	1.35064	1.57765	1.08892	6.46321	1.22581	0.957076	1.04477	1.85315	1.46608	5.20052	3.01662	1.70268	1.46751	1.88383	1.6324	2.90561	2.62052	2.39426	0.908647	6.93057	1.32209	5.7087	1.47053	6.22731	1.28649	2.03405	2.41104	6.92281	1.48583	6.96075	1.23146	5.13528	1.03477	2.08158	3.45496	2.37345	1.15837	4.51591	1.393	4.87217	4.3194	2.30501	1.45928	1.69915	1.72037	2.32229
O94804	STK10	Serine/threonine-protein kinase 10	0.535893	1.17426	0.453483	1.19957	0.419641	0.825252	0.531012	1.16088	0.588522	1.01112	0.478478	1.00213	0.666322	2.60591	0.618334	1.97018	0.43501	1.27926	0.795409	1.16867	0.890075	2.38364	0.999147	1.66224	0.653844	1.41084	0.627017	2.10001	0.568499	1.47853	0.818324	0.815615	0.641788	0.912201	0.53895	0.941236	0.854722	1.17456	0.579446	0.612441	0.670442	1.2144	0.575661	1.71411	0.679882	1.19174	0.735212
O94805	ACTL6B	Actin-like protein 6B	0.502263	0.941876	0.359383	0.967342	0.463604	0.57074	0.386151	0.969797	0.419193	1.4257	0.525791	1.14784	0.408484	0.830142	0.418132	0.883487	0.536532	1.02753	0.547608	0.898401	0.456648	1.1058	0.614909	1.06621	0.663315	1.23461	0.449758	0.811647	0.576306	0.769118	0.594914	1.14418	0.396573	1.30144	0.396941	0.830049	0.632097	1.21362	0.436479	0.909558	0.505683	0.948692	0.497259	1.00902	0.445436	1.89129	0.494317
O94808	GFPT2	Glutamine--fructose-6-phosphate aminotransferase [isomerizing] 2	0.836179	1.7819	0.751382	1.23721	0.606856	1.06908	0.88355	1.35856	0.791382	0.857588	NA	NA	NA	NA	NA	NA	NA	NA	NA	NA	NA	NA	NA	NA	NA	NA	NA	NA	NA	NA	NA	NA	NA	NA	NA	NA	NA	NA	NA	NA	NA	NA	NA	NA	NA	NA	NA
O94811	TPPP	Tubulin polymerization-promoting protein	3.84508	0.794827	2.35768	1.38936	1.47798	1.46147	0.935975	2.5797	0.63796	2.27154	2.61467	2.37667	3.30754	1.12926	2.22026	0.646428	0.697542	0.971968	1.02478	0.654682	NA	NA	NA	NA	NA	NA	NA	NA	NA	NA	1.88714	1.69254	1.28647	2.40661	8.47907	1.38494	3.01644	3.51176	1.57363	3.85366	1.5028	1.00637	0.985841	0.830826	3.07802	0.870372	1.44717
O94817	ATG12	Ubiquitin-like protein ATG12	NA	NA	NA	NA	NA	NA	NA	NA	NA	NA	NA	NA	NA	NA	NA	NA	NA	NA	NA	NA	NA	NA	NA	NA	NA	NA	NA	NA	NA	NA	NA	NA	NA	NA	NA	NA	NA	NA	NA	NA	NA	NA	NA	NA	NA	NA	NA
O94819	KBTBD11	Kelch repeat and BTB domain-containing protein 11	1.30391	0.832961	1.02325	1.44065	1.29873	0.825681	2.2179	0.837702	1.52706	1.18985	0.790969	0.745033	0.746388	0.855646	0.801408	0.708964	0.554801	0.954159	0.968969	0.619916	1.00543	0.777989	1.08502	0.804857	1.13862	0.916644	1.03961	1.12775	0.659952	0.986617	1.43746	1.02872	1.23025	0.732503	0.965827	0.667548	1.34347	0.464879	1.03507	0.615937	1.14081	1.22271	1.00392	0.954089	0.841803	1.00727	1.24176
O94822	LTN1	E3 ubiquitin-protein ligase listerin	0.483459	0.930968	0.415569	1.14453	0.516541	0.720209	0.511477	0.740231	0.474752	0.794435	0.475605	0.834279	0.510905	0.708081	0.420953	0.92234	0.64202	0.72882	0.535048	0.56458	0.466208	0.894182	0.449896	0.823032	0.396387	0.856758	0.360682	0.772441	0.31842	0.479796	0.657367	0.594366	0.600081	1.00812	0.40609	0.803456	0.659345	1.04885	0.405262	0.71866	0.522593	0.672531	0.489733	1.11137	0.439108	0.801348	0.394928
O94826	TOMM70	Mitochondrial import receptor subunit TOM70	0.653455	1.02955	0.476432	1.25164	0.566964	0.820019	0.534748	1.10696	0.568448	1.24743	0.526376	1.18169	0.436333	0.819809	0.498508	1.17104	0.613317	1.02322	0.6224	1.1251	0.525843	0.865499	0.493795	1.25512	0.588301	0.735674	0.406328	0.768721	0.509228	0.982485	0.516708	0.824132	0.498922	0.830796	0.411438	1.03796	0.57045	1.13594	0.459654	1.31003	0.483682	0.732994	0.434041	1.38401	0.425998	0.829506	0.511347
O94827	PLEKHG5	Pleckstrin homology domain-containing family G member 5	NA	NA	NA	NA	NA	NA	NA	NA	NA	NA	NA	NA	NA	NA	NA	NA	NA	NA	NA	NA	NA	NA	NA	NA	NA	NA	NA	NA	NA	NA	NA	NA	NA	NA	NA	NA	NA	NA	NA	NA	NA	NA	NA	NA	NA	NA	NA
O94829	IPO13	Importin-13	0.803513	0.836778	0.462037	0.516453	0.815701	0.491406	0.68786	0.721493	0.589306	0.591716	0.590636	0.662875	0.429503	0.608561	0.459451	0.934339	0.639369	0.780683	0.667382	0.885394	0.736481	0.965951	0.823808	0.894613	1.06802	1.14448	0.716432	0.749723	0.964413	0.826206	0.813586	1.15187	0.716588	1.02755	0.621019	1.08313	0.857773	1.34368	0.628233	1.2615	0.967459	1.28655	0.769415	1.20384	0.711994	1.33735	0.914198
O94830	DDHD2	Phospholipase DDHD2	0.824463	0.938518	0.557858	0.871152	0.979996	0.954781	0.719926	0.570234	0.575487	0.844782	0.670216	0.58934	0.437773	0.805401	0.673552	0.698635	0.588806	0.693708	0.57297	0.605389	0.514945	0.474832	0.502035	0.719579	0.620115	0.599572	0.576107	0.593243	0.558505	0.563665	0.603852	0.660561	0.586761	0.619623	0.563457	0.818461	0.703224	0.64852	0.562658	0.872387	0.666628	0.518868	0.554562	0.478288	0.476389	0.693124	0.495194
O94832	MYO1D	Unconventional myosin-Id	1.54231	2.56378	0.912903	2.15161	1.93079	2.50036	1.71252	1.5733	1.84146	2.50268	1.09071	1.65152	0.839948	1.64315	0.899905	2.01489	1.01932	2.04445	1.12982	1.5307	1.4394	2.51076	1.39348	1.89572	1.40143	1.53467	1.0434	1.69422	1.38005	1.79757	1.7985	2.13951	1.31968	2.75074	1.17603	3.85248	1.25636	2.51957	1.66328	2.65376	1.25722	1.65999	1.24085	3.15773	0.953502	2.27463	1.7469
O94842	TOX4	TOX high mobility group box family member 4	NA	NA	NA	NA	NA	NA	NA	NA	NA	NA	NA	NA	NA	NA	NA	NA	NA	NA	NA	NA	0.330676	0.563054	0.323823	0.546138	0.30673	0.619704	0.229444	0.342356	0.292714	0.494669	0.448187	0.258947	0.417454	0.676261	0.232181	0.416845	0.74456	0.839974	0.314047	0.620571	0.399229	0.542397	0.355114	0.773036	0.359777	0.602598	0.400694
O94851	MICAL2	[F-actin]-monooxygenase MICAL2	NA	NA	NA	NA	NA	NA	NA	NA	NA	NA	NA	NA	NA	NA	NA	NA	NA	NA	NA	NA	NA	NA	NA	NA	NA	NA	NA	NA	NA	NA	NA	NA	NA	NA	NA	NA	NA	NA	NA	NA	NA	NA	NA	NA	NA	NA	NA
O94855	SEC24D	Protein transport protein Sec24D	0.831672	2.11543	0.570803	1.12533	0.571515	1.14966	0.882968	1.10343	0.837783	1.78888	0.973975	1.28114	0.561372	1.30577	0.724389	1.63852	1.02367	1.30264	0.797084	0.958569	1.40675	1.12141	1.04455	1.08619	0.756775	1.27461	0.58006	1.3591	0.73331	1.21863	1.04887	1.2773	0.961482	1.12807	0.744307	1.5505	1.19001	1.26073	0.834642	2.87817	0.741104	1.13845	0.850565	1.1712	0.721858	1.45098	0.887201
O94856	NFASC	Neurofascin	NA	NA	NA	NA	NA	NA	NA	NA	NA	NA	1.4387	0.668593	1.25654	0.77664	1.01183	0.800863	1.1575	1.10945	0.874974	0.834192	NA	NA	NA	NA	NA	NA	NA	NA	NA	NA	NA	NA	NA	NA	NA	NA	NA	NA	NA	NA	NA	NA	NA	NA	NA	NA	NA
O94868	FCHSD2	F-BAR and double SH3 domains protein 2	NA	NA	NA	NA	NA	NA	NA	NA	NA	NA	NA	NA	NA	NA	NA	NA	NA	NA	NA	NA	0.525638	0.792598	0.623275	0.796735	0.689626	0.776123	0.432716	0.886557	0.485112	0.762356	NA	NA	NA	NA	NA	NA	NA	NA	NA	NA	0.638161	0.962337	0.551136	0.749226	0.478376	0.729376	0.602649
O94874	UFL1	E3 UFM1-protein ligase 1	0.890073	1.2219	0.614348	1.51857	0.752367	1.43597	0.744408	1.29221	0.935021	1.33983	0.879778	1.38007	0.689569	1.34027	0.6992	1.75535	1.02907	1.58647	1.00795	1.80981	1.09014	1.3042	0.809043	1.59549	0.923982	1.30866	0.725419	1.45612	0.81519	0.958884	0.966114	1.07525	0.817727	0.988213	0.712046	1.14319	0.866067	1.67059	0.800545	2.4018	0.647623	1.1958	0.52607	1.25169	0.719074	1.03143	0.802421
O94875	SORBS2	Sorbin and SH3 domain-containing protein 2	2.05965	1.03721	1.60986	1.06029	3.49553	1.09622	0.913995	0.71055	0.800421	1.50991	2.33047	0.693909	2.50162	0.667367	1.79697	0.938446	0.725139	0.829465	0.946399	0.708878	0.756267	0.617479	1.00606	0.907316	1.61412	1.09606	1.84218	0.78825	1.37329	0.92963	2.13912	0.717117	1.26939	1.00101	1.45097	1.11485	1.57785	0.809928	1.55697	2.39288	2.41484	0.612396	1.39323	0.463094	1.08391	0.593286	0.70146
O94876	TMCC1	Transmembrane and coiled-coil domains protein 1	NA	NA	NA	NA	NA	NA	NA	NA	NA	NA	NA	NA	NA	NA	NA	NA	NA	NA	NA	NA	NA	NA	NA	NA	NA	NA	NA	NA	NA	NA	NA	NA	NA	NA	NA	NA	NA	NA	NA	NA	NA	NA	NA	NA	NA	NA	NA
O94880	PHF14	PHD finger protein 14	0.720621	1.26277	0.519593	1.00604	0.814676	0.754815	0.656433	1.16105	0.69879	1.06211	NA	NA	NA	NA	NA	NA	NA	NA	NA	NA	0.621853	1.23971	0.702883	1.05228	0.753094	0.888111	0.660253	1.20836	0.706187	1.00557	NA	NA	NA	NA	NA	NA	NA	NA	NA	NA	NA	NA	NA	NA	NA	NA	NA
O94885	SASH1	SAM and SH3 domain-containing protein 1	1.22628	0.237203	0.974714	0.348793	1.09558	0.371932	1.22429	0.329707	0.982961	0.357332	1.18357	0.364805	1.24367	0.325012	1.32271	0.217165	1.22983	0.286461	1.22671	0.215015	1.10551	0.70182	1.08075	0.892094	1.10511	0.72134	1.00298	0.702665	1.06981	0.732299	0.784861	0.250775	0.72284	0.48843	0.696384	0.282566	0.819416	0.288213	0.673627	0.392118	1.09119	0.76687	1.09857	0.957321	1.18147	0.882115	1.50164
O94886	TMEM63A	CSC1-like protein 1	NA	NA	NA	NA	NA	NA	NA	NA	NA	NA	NA	NA	NA	NA	NA	NA	NA	NA	NA	NA	NA	NA	NA	NA	NA	NA	NA	NA	NA	NA	1.24487	1.75694	0.93233	1.78195	0.77454	1.15222	1.33605	1.73742	0.875083	6.03859	1.45503	1.78711	1.18012	2.25318	1.55909	1.58826	1.28281
O94887	FARP2	FERM, ARHGEF and pleckstrin domain-containing protein 2	0.2457	0.719217	0.152086	1.09586	0.30048	0.487613	0.180658	0.597652	0.278047	0.787615	0.994877	1.1187	0.845877	1.0161	0.921489	1.10818	1.0181	1.20644	0.922581	1.22211	NA	NA	NA	NA	NA	NA	NA	NA	NA	NA	0.789569	1.52034	0.646979	1.01869	0.685796	0.892055	0.782569	1.26657	0.689716	1.04445	0.540078	1.25699	0.345371	0.809762	0.522644	1.135	0.52442
O94888	UBXN7	UBX domain-containing protein 7	0.790062	0.674637	0.387479	0.724947	0.550566	0.500608	0.553565	0.618384	0.418146	1.29145	0.243814	1.19	0.304307	0.422522	0.261703	0.920579	0.258427	0.517326	0.315274	0.60833	0.471955	0.746058	0.459779	0.783305	0.603178	1.19881	0.286694	0.513434	0.391581	0.505369	0.653477	1.06359	0.602053	1.46769	0.411062	1.01502	0.6669	1.5383	0.520148	1.02237	0.507768	0.958537	0.475144	1.50805	0.479239	1.59797	0.429811
O94900	TOX	Thymocyte selection-associated high mobility group box protein TOX	NA	NA	NA	NA	NA	NA	NA	NA	NA	NA	NA	NA	NA	NA	NA	NA	NA	NA	NA	NA	NA	NA	NA	NA	NA	NA	NA	NA	NA	NA	NA	NA	NA	NA	NA	NA	NA	NA	NA	NA	NA	NA	NA	NA	NA	NA	NA
O94901	SUN1	SUN domain-containing protein 1	1.23533	1.60835	0.92493	1.17092	3.14251	1.14005	1.46309	1.04237	1.18891	1.26476	1.20829	0.955487	0.983893	0.783585	0.836813	1.00953	1.14157	1.18951	1.12257	1.30223	0.768618	1.07477	0.919946	1.15374	2.04852	0.835094	0.745971	1.00727	1.55352	0.889672	0.794617	1.08267	0.557331	0.985619	0.816151	1.10847	0.8532	1.15114	0.956498	1.20227	0.837848	0.756271	0.892551	1.28006	0.808036	1.23112	0.9052
O94903	PLPBP	Pyridoxal phosphate homeostasis protein	0.984038	0.771686	0.511449	1.06686	1.06305	0.878656	1.05411	0.617541	0.725639	1.19104	0.96524	1.11561	0.676472	1.25788	0.670894	1.77782	0.934472	1.66027	0.957372	1.40467	0.737513	0.589211	0.882961	0.812638	1.06471	0.920405	0.573568	0.834344	0.952666	1.04408	0.859875	0.818844	0.600301	0.70952	0.602101	0.925479	0.912917	0.930139	0.67264	1.001	0.91914	1.08965	0.65845	0.934265	0.768357	1.22725	0.643167
O94905	ERLIN2	Erlin-2	1.21799	1.51038	0.85768	1.1027	2.07909	1.08782	1.18556	0.904988	1.16021	1.45581	1.06475	1.2835	0.985484	1.0612	1.02313	1.32434	1.20743	2.23589	1.56095	1.64243	1.17131	0.952599	1.15293	1.33291	2.31895	1.19631	1.17154	1.02895	1.51976	1.06049	1.07938	1.09819	0.697209	0.857316	0.837563	1.3291	1.32474	1.03148	1.06607	2.27717	1.30294	1.36044	0.913697	0.890413	1.18237	1.10456	0.920414
O94906	PRPF6	Pre-mRNA-processing factor 6	0.399547	0.96757	0.2728	0.750171	0.465845	0.622749	0.372474	0.504896	0.403243	0.860107	0.336381	0.590667	0.275531	0.576462	0.293797	0.690946	0.339245	0.876487	0.371488	0.751911	0.362404	0.727947	0.390268	0.879317	0.480701	0.538557	0.288727	0.755529	0.405885	0.681231	0.38167	0.447935	0.32855	0.819958	0.26634	0.548982	0.415679	0.795721	0.310802	0.747919	0.236701	0.461031	0.215796	0.652999	0.208199	0.384044	0.240979
O94911	ABCA8	ATP-binding cassette sub-family A member 8	3.12623	0.944559	1.90776	0.95598	5.13325	1.23013	2.79497	1.12722	2.00206	1.04061	2.5015	0.7736	2.03741	1.1217	1.70048	0.968333	2.45652	3.72987	3.49226	0.772208	1.6292	1.0551	2.92364	1.39941	5.75579	1.82233	3.6519	1.28434	3.50155	1.07956	2.12188	0.752641	1.72279	0.852723	1.511	1.08806	2.00213	0.985031	1.42861	1.30688	NA	NA	NA	NA	NA	NA	NA
O94913	PCF11	Pre-mRNA cleavage complex 2 protein Pcf11	NA	NA	NA	NA	NA	NA	NA	NA	NA	NA	NA	NA	NA	NA	NA	NA	NA	NA	NA	NA	0.453473	0.965061	0.472043	1.02453	0.820042	0.729524	0.424302	0.508424	0.743045	0.67927	NA	NA	NA	NA	NA	NA	NA	NA	NA	NA	NA	NA	NA	NA	NA	NA	NA
O94915	FRYL	Protein furry homolog-like	0.48668	1.2493	0.358112	0.792914	0.534799	0.764241	0.631229	0.831779	0.590522	0.942947	0.738598	0.887337	0.489724	0.795753	0.539379	0.970669	0.583709	0.970914	0.572653	0.945053	0.46305	1.0474	0.515215	0.645907	0.502103	0.863208	0.491569	0.813024	0.49255	0.757318	0.683354	0.808263	0.596563	1.04073	0.491288	0.764155	0.668578	0.893483	0.464805	0.955508	0.396323	0.761787	0.378834	0.896603	0.387297	0.902895	0.432573
O94916	NFAT5	Nuclear factor of activated T-cells 5	0.48743	0.977738	0.372089	0.687756	0.565225	0.44565	0.499962	0.431199	0.431723	0.553026	5.3013	1.98765	3.42471	1.33026	2.79385	1.98141	8.86512	3.03447	4.03141	1.35977	0.718227	0.447215	0.588044	1.05481	0.489547	0.400466	0.2557	0.438238	0.355575	0.555276	0.341429	0.467379	0.324123	0.556429	0.280852	0.461143	0.411226	0.47334	0.392373	0.689355	0.673763	0.566578	0.549231	0.625862	0.490568	0.697812	0.544402
O94919	ENDOD1	Endonuclease domain-containing 1 protein	1.51823	1.89707	1.05729	0.967555	1.60553	1.25083	1.17552	1.3265	1.23241	1.34875	2.22686	2.56695	1.47388	1.42669	1.97382	1.29267	1.684	1.75036	1.58781	3.48421	0.989854	1.37133	1.13989	1.60315	1.43467	1.51614	1.63482	1.24399	1.46363	1.30874	0.898399	1.05023	0.649995	1.00212	0.853892	0.978851	0.89846	0.982542	0.684518	1.07313	2.02622	1.80783	1.92726	1.53293	1.93983	1.60497	1.76371
O94921	CDK14	Cyclin-dependent kinase 14	0.253217	0.583782	0.179162	0.606287	0.22464	0.432553	0.178337	0.448164	0.207776	0.673196	0.213951	0.382309	0.151505	0.350535	0.184823	0.42867	0.129881	0.434862	0.167854	0.328437	0.251022	0.619939	0.25699	0.56114	0.34596	0.417596	0.28243	0.499883	0.322794	0.515351	0.194137	0.467653	0.17842	0.687101	0.146918	0.384521	0.205591	0.566706	0.158859	0.238714	0.200259	0.387181	0.169057	0.64488	0.187917	0.549078	0.205029
O94923	GLCE	D-glucuronyl C5-epimerase	0.585122	1.32823	0.544863	1.85013	0.563417	0.810117	0.593839	1.31301	0.611062	1.03581	NA	NA	NA	NA	NA	NA	NA	NA	NA	NA	NA	NA	NA	NA	NA	NA	NA	NA	NA	NA	0.818977	1.10602	0.756446	1.09417	0.560778	1.12608	1.18941	1.43807	1.09763	3.97466	NA	NA	NA	NA	NA	NA	NA
O94925	GLS	Glutaminase kidney isoform, mitochondrial	0.400058	0.617097	0.187523	0.348637	0.344198	0.349418	0.346674	0.257484	0.289163	0.582742	0.27054	0.351551	0.222426	0.264406	0.187389	0.486511	0.223172	0.356298	0.257302	0.313043	0.326585	0.456218	0.353481	0.294335	0.40051	0.397129	0.383984	0.864886	0.371909	0.634755	0.400982	0.359129	0.29922	0.422244	0.298016	0.448025	0.479934	0.503635	0.236355	0.332567	0.377023	0.361058	0.32675	0.435823	0.288907	0.421684	0.337304
O94927	HAUS5	HAUS augmin-like complex subunit 5	0.599345	0.843529	0.379801	0.659593	0.572593	0.543789	0.556095	0.493331	0.512258	0.959988	NA	NA	NA	NA	NA	NA	NA	NA	NA	NA	0.51337	0.674409	0.512653	0.894602	0.504241	0.667963	0.446774	0.625692	0.580724	0.613094	NA	NA	NA	NA	NA	NA	NA	NA	NA	NA	0.253439	0.426637	0.292881	0.570581	0.220398	0.50594	0.21507
O94929	ABLIM3	Actin-binding LIM protein 3	2.33183	1.27386	1.07655	0.844807	2.45665	0.854315	1.58914	0.828555	2.02571	0.993596	NA	NA	NA	NA	NA	NA	NA	NA	NA	NA	NA	NA	NA	NA	NA	NA	NA	NA	NA	NA	NA	NA	NA	NA	NA	NA	NA	NA	NA	NA	NA	NA	NA	NA	NA	NA	NA
O94952	FBXO21	F-box only protein 21	NA	NA	NA	NA	NA	NA	NA	NA	NA	NA	0.811293	0.865794	0.545671	0.605918	0.622422	0.782402	0.739495	0.913946	0.618021	1.12464	NA	NA	NA	NA	NA	NA	NA	NA	NA	NA	0.412004	0.799372	0.553699	0.797601	0.76262	0.71834	0.543153	1.05595	0.618791	3.22486	NA	NA	NA	NA	NA	NA	NA
O94956	SLCO2B1	Solute carrier organic anion transporter family member 2B1	NA	NA	NA	NA	NA	NA	NA	NA	NA	NA	NA	NA	NA	NA	NA	NA	NA	NA	NA	NA	NA	NA	NA	NA	NA	NA	NA	NA	NA	NA	NA	NA	NA	NA	NA	NA	NA	NA	NA	NA	NA	NA	NA	NA	NA	NA	NA
O94964	SOGA1	Protein SOGA1	NA	NA	NA	NA	NA	NA	NA	NA	NA	NA	NA	NA	NA	NA	NA	NA	NA	NA	NA	NA	NA	NA	NA	NA	NA	NA	NA	NA	NA	NA	0.520962	1.06167	0.426007	0.87282	0.48815	0.665428	0.545014	1.32108	0.484044	0.344427	0.653089	0.878251	0.541867	1.04448	0.489738	0.947822	0.568064
O94966	USP19	Ubiquitin carboxyl-terminal hydrolase 19	NA	NA	NA	NA	NA	NA	NA	NA	NA	NA	NA	NA	NA	NA	NA	NA	NA	NA	NA	NA	0.730274	1.08275	0.875685	1.14257	0.769066	0.988367	0.692266	1.11275	0.70457	0.865327	0.911934	0.878968	0.74186	0.831673	0.514823	0.611334	0.995166	1.29291	0.495218	1.23502	0.4078	0.839857	0.398594	1.04421	0.43699	0.882277	0.366566
O94967	WDR47	WD repeat-containing protein 47	0.704094	0.981525	0.51779	0.876989	0.732404	1.10257	0.623517	0.873652	0.629358	1.31992	NA	NA	NA	NA	NA	NA	NA	NA	NA	NA	NA	NA	NA	NA	NA	NA	NA	NA	NA	NA	NA	NA	NA	NA	NA	NA	NA	NA	NA	NA	0.662059	0.856722	0.747153	1.19336	0.66982	1.38921	0.645572
O94973	AP2A2	AP-2 complex subunit alpha-2	1.06381	1.3749	0.678017	0.973249	1.03989	1.16916	1.16601	1.1225	1.23336	1.51731	1.39209	1.3294	0.854802	1.36389	0.90213	1.11254	1.19766	1.47346	1.08128	1.27903	1.09867	1.0287	1.18596	1.11579	1.00577	1.24197	1.02002	1.33893	1.11178	1.15879	1.22498	1.07587	1.02286	1.08365	0.87891	1.0494	1.0816	1.30304	0.94034	1.44827	0.966993	1.04799	0.900798	1.31357	1.02556	1.20056	1.09588
O94979	SEC31A	Protein transport protein Sec31A	0.507825	0.924086	0.440815	0.863287	0.4493	0.760012	0.413525	0.666553	0.508845	0.964279	0.626571	0.72985	0.422849	0.858824	0.522122	1.2813	0.616589	0.920446	0.584841	0.732992	0.840679	1.03124	0.721724	0.928617	0.720381	0.881264	0.535492	0.965122	0.699629	0.942756	0.715121	0.800752	0.621614	0.901062	0.562812	1.04672	1.01808	1.14829	0.591359	1.61768	0.65557	0.885409	0.620656	1.27262	0.655103	1.19578	0.804449
O94985	CLSTN1	Calsyntenin-1	1.27335	2.42253	1.40563	1.48037	1.48737	1.4752	1.34824	1.60659	1.75269	2.33125	1.22505	2.16386	0.856675	1.00717	1.09611	2.24441	1.43883	1.82626	1.09217	3.30171	1.21798	2.17582	1.38817	1.55073	1.20053	2.59163	0.896735	1.42544	1.38504	2.8026	1.60718	2.25214	1.11861	2.73082	1.33618	1.37184	1.26978	2.31047	0.933903	1.159	1.27172	1.28422	1.13659	1.4392	1.14951	3.37075	1.56347
O94992	HEXIM1	Protein HEXIM1	0.510731	0.844656	0.334694	0.91705	0.499378	0.518895	0.516043	0.91582	0.471192	0.868913	0.367933	0.59505	0.194295	0.543476	0.181978	0.39138	0.288634	0.801795	0.353878	0.43677	0.553647	1.031	0.633531	0.787564	0.539544	0.266144	0.388532	0.812872	0.612632	0.587058	0.446341	0.763112	0.367416	1.55057	0.185026	0.468578	0.339968	0.734761	0.290797	0.842151	0.305869	0.483727	0.290188	0.803758	0.252246	0.655721	0.288993
O95049	TJP3	Tight junction protein ZO-3	NA	NA	NA	NA	NA	NA	NA	NA	NA	NA	1.83098	1.52702	2.4975	1.70576	1.39144	4.54904	2.03051	4.32356	2.4874	1.61885	NA	NA	NA	NA	NA	NA	NA	NA	NA	NA	1.57817	1.41868	1.54954	2.03095	1.12191	2.34049	1.32638	5.57467	1.40163	4.07658	NA	NA	NA	NA	NA	NA	NA
O95059	RPP14	Ribonuclease P protein subunit p14	0.297775	0.819006	0.287142	0.733554	0.309978	0.493451	0.254419	0.677439	0.387926	0.99316	NA	NA	NA	NA	NA	NA	NA	NA	NA	NA	0.348078	0.534854	0.289267	0.59886	0.277313	0.517391	0.181844	0.581349	0.233713	0.659306	0.419286	0.818548	0.40948	0.781	0.322589	0.592097	0.443776	0.964006	0.429067	0.576539	NA	NA	NA	NA	NA	NA	NA
O95070	YIF1A	Protein YIF1A	0.688594	1.45495	0.446781	1.08206	0.644768	0.814694	0.583981	0.909177	0.675147	1.01875	NA	NA	NA	NA	NA	NA	NA	NA	NA	NA	NA	NA	NA	NA	NA	NA	NA	NA	NA	NA	NA	NA	NA	NA	NA	NA	NA	NA	NA	NA	NA	NA	NA	NA	NA	NA	NA
O95071	UBR5	E3 ubiquitin-protein ligase UBR5	0.456859	1.27678	0.354316	0.855908	0.496091	0.706518	0.443388	0.579225	0.48283	1.13457	0.266476	0.491169	0.229074	0.532882	0.236153	0.706808	0.249593	0.833526	0.309887	0.53998	0.34485	0.687422	0.349658	0.68457	0.355774	0.690627	0.245328	0.529795	0.36095	0.556186	0.357675	0.577865	0.32332	0.690117	0.291381	0.459204	0.419383	0.605372	0.316395	0.544388	0.494364	0.594632	0.530578	0.852031	0.418465	0.825407	0.718018
O95081	AGFG2	Arf-GAP domain and FG repeat-containing protein 2	NA	NA	NA	NA	NA	NA	NA	NA	NA	NA	0.646445	0.640373	0.501308	1.9653	0.41021	1.16903	0.546189	1.83959	0.662898	0.624588	0.912789	0.929693	1.01828	0.974212	1.40425	0.974004	0.791901	1.23721	1.21196	1.11577	1.0105	0.828437	0.969191	1.507	0.769454	1.49193	1.18034	2.13368	0.9825	1.10422	0.6827	1.04444	1.13754	2.11224	0.551041	0.683097	0.779762
O95084	PRSS23	Serine protease 23	NA	NA	NA	NA	NA	NA	NA	NA	NA	NA	NA	NA	NA	NA	NA	NA	NA	NA	NA	NA	NA	NA	NA	NA	NA	NA	NA	NA	NA	NA	NA	NA	NA	NA	NA	NA	NA	NA	NA	NA	NA	NA	NA	NA	NA	NA	NA
O95104	SCAF4	SR-related and CTD-associated factor 4	0.342838	0.736127	0.283331	0.900472	0.432125	0.547258	0.342245	0.639132	0.396523	0.83137	0.369038	0.586373	0.303048	0.486999	0.297242	0.663835	0.499977	0.700058	0.43752	0.613175	0.466355	1.08734	0.561123	0.963956	0.623114	0.571436	0.357773	0.83004	0.510053	0.845185	0.376073	0.678134	0.405176	0.651697	0.339935	0.662978	0.466233	1.00592	0.406199	0.84057	0.392509	0.703154	0.374543	0.967238	0.360836	0.775662	0.400372
O95125	ZNF202	Zinc finger protein 202	0.322836	0.849946	0.384646	0.526982	0.316697	0.578435	0.39691	0.248153	0.225639	0.933429	NA	NA	NA	NA	NA	NA	NA	NA	NA	NA	0.286952	0.485054	0.432544	0.496758	0.769984	0.525272	0.402036	0.396374	0.485494	0.485934	NA	NA	NA	NA	NA	NA	NA	NA	NA	NA	NA	NA	NA	NA	NA	NA	NA
O95139	NDUFB6	NADH dehydrogenase [ubiquinone] 1 beta subcomplex subunit 6	0.443944	0.639632	0.280212	1.03669	0.339	0.701568	0.258981	0.724304	0.419443	1.13814	0.78225	0.792256	0.659921	0.892675	0.645861	1.09368	0.741605	1.31858	0.79555	1.03933	0.667574	0.795044	0.718019	0.92681	0.672991	0.895704	0.695815	0.826651	0.670278	0.788051	0.752688	0.796129	0.740573	0.82129	0.683082	0.790609	0.892043	0.942724	0.681118	0.77448	1.10535	0.901678	0.693156	0.945033	1.17401	0.942583	1.52314
O95140	MFN2	Mitofusin-2	0.692626	1.59975	0.544376	1.10479	0.778817	0.82563	0.827314	0.919005	0.828442	1.44824	0.800914	1.04983	0.61655	0.93411	0.706968	1.23903	0.897905	1.60405	0.766179	1.05868	0.725548	1.12353	0.791922	1.25295	0.866498	1.17518	0.747894	1.06668	0.883036	0.920945	0.8586	0.990669	0.773469	0.933359	0.715532	1.07677	0.846605	1.31655	0.480644	0.789729	0.60188	0.823362	0.485099	1.19205	0.577408	1.14213	0.489999
O95149	SNUPN	Snurportin-1	NA	NA	NA	NA	NA	NA	NA	NA	NA	NA	0.294746	0.569317	0.238728	0.43461	0.321524	0.466183	0.259915	0.545614	0.320004	0.51784	0.56815	0.610475	0.581257	0.795524	0.509149	0.58794	0.494555	0.660364	0.554732	0.618505	0.416232	0.528408	0.32831	0.739671	0.268094	0.482265	0.320198	0.742473	0.421988	0.567686	0.426473	0.437813	0.35516	0.597253	0.350501	0.477821	0.433673
O95154	AKR7A3	Aflatoxin B1 aldehyde reductase member 3	NA	NA	NA	NA	NA	NA	NA	NA	NA	NA	NA	NA	NA	NA	NA	NA	NA	NA	NA	NA	NA	NA	NA	NA	NA	NA	NA	NA	NA	NA	NA	NA	NA	NA	NA	NA	NA	NA	NA	NA	NA	NA	NA	NA	NA	NA	NA
O95155	UBE4B	Ubiquitin conjugation factor E4 B	0.527357	0.60412	0.360608	0.672797	0.406751	0.57684	0.370606	0.544098	0.428429	0.69362	0.344185	0.656234	0.272892	0.49697	0.346409	0.690627	0.357594	0.678539	0.32823	0.592251	0.385388	0.566758	0.366555	0.652419	0.34518	0.649443	0.314167	0.459532	0.398411	0.519359	0.410828	0.673778	0.432639	0.57865	0.41004	0.578484	0.449033	0.813584	0.353138	0.866689	0.258337	0.439654	0.268313	0.530929	0.256662	0.556928	0.296382
O95159	ZFPL1	Zinc finger protein-like 1	0.867931	2.05419	0.696926	2.0024	0.605424	1.13343	0.750125	2.36438	0.792457	1.71386	0.635254	1.17104	0.497396	1.04772	0.492023	1.38051	0.600542	0.925415	0.571297	1.05404	0.616025	1.32855	0.742011	1.58694	0.425759	1.24692	0.318809	1.26203	0.297787	1.52427	1.12541	1.84077	1.20686	1.68051	0.677917	1.26532	1.17543	1.55219	0.702336	2.91072	NA	NA	NA	NA	NA	NA	NA
O95163	ELP1	Elongator complex protein 1	0.361543	0.591195	0.282718	0.667198	0.350721	0.455142	0.337634	0.600028	0.383023	0.873867	0.310833	0.432462	0.297313	0.413866	0.287041	0.569451	0.337415	0.58789	0.419327	0.536686	0.389828	0.476567	0.406337	0.551468	0.35274	0.643121	0.295266	0.491169	0.35672	0.491155	0.358095	0.500165	0.280216	0.433644	0.222889	0.383099	0.334173	0.505014	0.242351	0.575491	0.254731	0.529676	0.253973	0.499671	0.267382	0.593204	0.27791
O95164	UBL3	Ubiquitin-like protein 3	1.71188	1.67158	1.17609	1.81777	1.1887	1.87961	1.19623	1.44349	1.90238	2.07543	NA	NA	NA	NA	NA	NA	NA	NA	NA	NA	1.60103	1.50531	1.25677	1.77979	1.0165	1.00057	1.17604	2.09453	1.32141	1.89451	NA	NA	NA	NA	NA	NA	NA	NA	NA	NA	NA	NA	NA	NA	NA	NA	NA
O95167	NDUFA3	NADH dehydrogenase [ubiquinone] 1 alpha subcomplex subunit 3	NA	NA	NA	NA	NA	NA	NA	NA	NA	NA	NA	NA	NA	NA	NA	NA	NA	NA	NA	NA	0.542559	0.62479	0.412638	0.649621	0.489201	0.524814	0.567687	0.661219	0.60061	0.48817	NA	NA	NA	NA	NA	NA	NA	NA	NA	NA	0.491161	0.748901	0.45634	0.805241	0.610308	0.438483	0.648311
O95168	NDUFB4	NADH dehydrogenase [ubiquinone] 1 beta subcomplex subunit 4	1.02305	1.72384	0.606739	1.83338	0.823413	1.48374	0.79949	1.32514	1.11379	1.73734	1.28738	1.21416	0.850737	1.5048	1.0277	1.83687	1.00478	2.88341	1.05296	2.13017	1.00829	1.20856	1.12124	1.66165	1.07728	1.3773	0.965589	1.39491	1.14301	1.662	1.04124	0.843227	0.997858	1.01922	0.888913	1.11422	1.26715	2.00478	0.76311	1.85723	0.838394	1.2779	0.836001	1.47349	0.975387	1.61835	1.00228
O95169	NDUFB8	NADH dehydrogenase [ubiquinone] 1 beta subcomplex subunit 8, mitochondrial	1.06738	1.78229	0.527487	1.75329	0.827438	0.906427	0.928944	1.30902	1.00598	1.78589	1.12039	1.8203	0.72435	0.965234	1.03435	1.93432	0.757809	2.81265	1.03282	1.19872	NA	NA	NA	NA	NA	NA	NA	NA	NA	NA	1.1878	1.14056	1.1091	1.38761	0.887316	1.41303	1.12199	1.55916	0.977933	1.95919	0.74728	1.26793	0.619237	1.07623	0.789248	1.30243	0.844584
O95171	SCEL	Sciellin	0.259033	0.815373	0.212216	1.01777	0.232366	0.284447	0.202715	0.359558	0.291834	0.847019	0.409335	2.20006	0.581657	1.37757	0.505369	1.5214	1.26046	0.698912	0.858948	1.40109	3.81588	2.68179	3.09128	10.8541	0.972858	1.51171	0.497765	0.818041	0.725474	5.18642	1.58281	0.984149	1.3958	1.85354	0.716736	1.06341	0.951366	4.11271	0.75901	0.820335	0.560454	1.22348	1.12388	1.102	1.19413	2.26892	2.29124
O95182	NDUFA7	NADH dehydrogenase [ubiquinone] 1 alpha subcomplex subunit 7	0.709544	1.2412	0.324031	1.05195	0.492744	0.459513	0.586169	0.703067	0.898372	0.729609	0.585436	0.694497	0.476725	0.791453	0.475631	1.23685	0.751791	1.32336	0.608668	1.15693	1.05363	0.837637	0.66933	1.15339	0.900905	1.25712	1.19525	0.971456	1.06945	0.906349	NA	NA	NA	NA	NA	NA	NA	NA	NA	NA	0.384588	0.801982	0.325466	0.676846	0.358629	0.616618	0.341428
O95183	VAMP5	Vesicle-associated membrane protein 5	NA	NA	NA	NA	NA	NA	NA	NA	NA	NA	NA	NA	NA	NA	NA	NA	NA	NA	NA	NA	NA	NA	NA	NA	NA	NA	NA	NA	NA	NA	NA	NA	NA	NA	NA	NA	NA	NA	NA	NA	NA	NA	NA	NA	NA	NA	NA
O95197	RTN3	Reticulon-3	0.665733	0.902495	0.407381	0.744827	0.67072	0.659789	0.436795	0.653963	0.442881	0.858227	0.840157	0.829299	0.598236	1.04076	0.691033	0.741031	0.782683	0.960919	0.753985	0.738756	0.465635	0.70275	0.483809	0.928225	0.55958	0.748517	0.488915	0.68483	0.503251	0.707349	1.00296	0.775672	0.680944	0.70086	0.569262	0.645037	0.79077	0.753471	0.632116	0.682728	0.376367	0.321276	0.24836	0.564091	0.322504	0.420516	0.29755
O95202	LETM1	Mitochondrial proton/calcium exchanger protein	0.184952	0.323736	0.142535	0.331984	0.160429	0.261263	0.142095	0.245908	0.184354	0.385054	0.172291	0.239174	0.154618	0.265234	0.160406	0.46025	0.195297	0.376842	0.187588	0.514471	0.196943	0.374728	0.204779	0.427969	0.21366	0.327486	0.154181	0.321223	0.208925	0.393289	0.241054	0.293616	0.255513	0.420449	0.198552	0.373971	0.322307	0.375885	0.21888	0.659845	0.16024	0.319131	0.147893	0.439281	0.168391	0.330714	0.201377
O95208	EPN2	Epsin-2	0.591732	0.616591	0.423361	0.561659	0.356774	0.541967	0.400938	0.639766	0.46081	0.687094	0.373076	0.679967	0.527834	0.296254	0.42946	0.552783	0.661195	0.438155	0.532832	0.745794	0.626065	0.690539	0.539343	0.649229	0.619405	0.543904	0.434307	0.466231	0.486934	0.562942	NA	NA	NA	NA	NA	NA	NA	NA	NA	NA	NA	NA	NA	NA	NA	NA	NA
O95210	STBD1	Starch-binding domain-containing protein 1	NA	NA	NA	NA	NA	NA	NA	NA	NA	NA	NA	NA	NA	NA	NA	NA	NA	NA	NA	NA	0.43025	0.639715	0.73687	0.472738	0.501576	0.666404	0.570359	0.542774	0.583542	0.551121	0.705576	0.548666	0.667663	0.795144	0.476661	0.839443	0.633069	0.786175	0.503052	0.987493	0.670738	0.621942	0.612407	0.693546	0.680483	0.793268	0.632258
O95214	LEPROTL1	Leptin receptor overlapping transcript-like 1	NA	NA	NA	NA	NA	NA	NA	NA	NA	NA	NA	NA	NA	NA	NA	NA	NA	NA	NA	NA	NA	NA	NA	NA	NA	NA	NA	NA	NA	NA	NA	NA	NA	NA	NA	NA	NA	NA	NA	NA	NA	NA	NA	NA	NA	NA	NA
O95218	ZRANB2	Zinc finger Ran-binding domain-containing protein 2	0.132386	0.228089	0.116381	0.151158	0.077478	0.104611	0.0980258	0.146902	0.0894802	0.10513	0.376215	0.330281	0.282943	0.297485	0.261349	0.439275	0.249541	0.27116	0.336192	0.509892	0.419461	0.317888	0.315338	0.383172	0.362973	0.64844	0.219625	0.321711	0.273758	0.237992	0.209559	0.103954	0.246101	0.610631	0.0848067	0.225569	0.135118	0.231158	0.186855	0.750986	0.226552	0.342251	0.148429	0.376043	0.177036	0.248198	0.219137
[truncated: 8,992 more rows]
[truncated: 175 more columns]

## Sheet: Table S3B
Table S3B. The phosphoproteomic profiling of 111 paired samples.
[truncated: 46,714 more rows]
[truncated: 177 more columns]
