# Supplementary material for: Large language models completely understand molecular characteristics of squamous cervical cancer
Source: Research Square preprint supplement (doi:10.21203/rs.3.rs-2855719/v1), 2023-05-30
Supplement: Supplementary file 3 [file 635dab8ad9d6ee37596f0be5.xlsx]

## Sheet: Summary
Table S4. The DEMs, DEPs, DRPs and DPPs in SCC tumor against NAT samples. Together with DICs of interests
Sheet	Description
Table S4A	The list of 1,394 DEPs.
Table S4B	The list of 1,191 DPPs.
Table S4C	The list of 4,598 DRPs.
Table S4D	The list of 2,424 DEGs.
Table S4E	The list of 2,073 omic DICs.
Table S4F	The list of 288 single-cell DICs.

## Sheet: Table S4A
Table S4A. The list of 1,394 DEPs.
Protein accession	Gene name	Protein description	Tumor	NAT	FC	Log2 FC	P value	Adjust P
Q8TDB6	DTX3L	E3 ubiquitin-protein ligase DTX3L	3.30444	1.73176	1.90814	0.932168	7.04725e-20	3.39129e-18
P12004	PCNA	Proliferating cell nuclear antigen	0.838665	0.446682	1.87755	0.908848	8.29371e-20	3.39129e-18
O95470	SGPL1	Sphingosine-1-phosphate lyase 1	1.47582	0.815657	1.80937	0.855484	6.15144e-20	3.39129e-18
O00148	DDX39A	ATP-dependent RNA helicase DDX39A	0.640312	0.367614	1.7418	0.800582	9.49702e-20	3.39129e-18
P08621	SNRNP70	U1 small nuclear ribonucleoprotein 70 kDa	0.613279	0.375283	1.63418	0.708563	8.29371e-20	3.39129e-18
O75400	PRPF40A	Pre-mRNA-processing factor 40 homolog A	0.778178	0.509352	1.52778	0.611438	5.98628e-20	3.39129e-18
Q6NWY9	PRPF40B	Pre-mRNA-processing factor 40 homolog B	0.778178	0.509352	1.52778	0.611438	5.98628e-20	3.39129e-18
Q9HC35	EML4	Echinoderm microtubule-associated protein-like 4	1.34632	0.886432	1.51881	0.602938	6.49539e-20	3.39129e-18
P11940	PABPC1	Polyadenylate-binding protein 1	0.894365	0.620281	1.44187	0.527941	9.49702e-20	3.39129e-18
Q4VXU2	PABPC1L	Polyadenylate-binding protein 1-like	0.894365	0.620281	1.44187	0.527941	9.49702e-20	3.39129e-18
Q96DU9	PABPC5	Polyadenylate-binding protein 5	0.894365	0.620281	1.44187	0.527941	9.49702e-20	3.39129e-18
Q9H361	PABPC3	Polyadenylate-binding protein 3	0.894365	0.620281	1.44187	0.527941	9.49702e-20	3.39129e-18
Q86WG5	SBF2	Myotubularin-related protein 13	1.14711	1.84726	0.620978	-0.687386	5.98628e-20	3.39129e-18
Q8NEG7	DENND6B	Protein DENND6B	1.14711	1.84726	0.620978	-0.687386	5.98628e-20	3.39129e-18
P46939	UTRN	Utrophin	1.22335	2.06772	0.59164	-0.757208	8.52165e-20	3.39129e-18
Q13474	DRP2	Dystrophin-related protein 2	1.22335	2.06772	0.59164	-0.757208	8.52165e-20	3.39129e-18
O43491	EPB41L2	Band 4.1-like protein 2	0.743583	1.28839	0.577141	-0.793005	8.07179e-20	3.39129e-18
O75197	LRP5	Low-density lipoprotein receptor-related protein 5	1.68829	2.94986	0.57233	-0.805081	7.85574e-20	3.39129e-18
O75581	LRP6	Low-density lipoprotein receptor-related protein 6	1.68829	2.94986	0.57233	-0.805081	7.85574e-20	3.39129e-18
Q07954	LRP1	Prolow-density lipoprotein receptor-related protein 1	1.68829	2.94986	0.57233	-0.805081	7.85574e-20	3.39129e-18
P09619	PDGFRB	Platelet-derived growth factor receptor beta	1.46133	2.66	0.549372	-0.864145	9.49702e-20	3.39129e-18
P61764	STXBP1	Syntaxin-binding protein 1	0.493182	0.90953	0.542238	-0.883002	6.15144e-20	3.39129e-18
P08237	PFKM	ATP-dependent 6-phosphofructokinase, muscle type	0.736622	1.3636	0.540206	-0.888419	7.85574e-20	3.39129e-18
Q5T013	HYI	Putative hydroxypyruvate isomerase	1.23728	2.31128	0.535322	-0.901522	7.24131e-20	3.39129e-18
P00568	AK1	Adenylate kinase isoenzyme 1	0.799794	1.51573	0.527662	-0.922315	9.49702e-20	3.39129e-18
Q9Y6K8	AK5	Adenylate kinase isoenzyme 5	0.799794	1.51573	0.527662	-0.922315	9.49702e-20	3.39129e-18
P23634	ATP2B4	Plasma membrane calcium-transporting ATPase 4	1.71289	3.33964	0.512896	-0.963262	8.99628e-20	3.39129e-18
P06396	GSN	Gelsolin	2.36249	4.76565	0.495734	-1.01236	7.24131e-20	3.39129e-18
O75368	SH3BGRL	SH3 domain-binding glutamic acid-rich-like protein	1.51191	3.07974	0.490922	-1.02643	9.2433e-20	3.39129e-18
Q16555	DPYSL2	Dihydropyrimidinase-related protein 2	1.00099	2.04086	0.490476	-1.02775	8.07179e-20	3.39129e-18
Q99536	VAT1	Synaptic vesicle membrane protein VAT-1 homolog	1	2.04292	0.489495	-1.03064	7.24131e-20	3.39129e-18
Q9BYE2	TMPRSS13	Transmembrane protease serine 13	0.523496	1.07168	0.48848	-1.03363	8.52165e-20	3.39129e-18
O75382	TRIM3	Tripartite motif-containing protein 3	1.04398	2.17782	0.479369	-1.06079	7.64541e-20	3.39129e-18
O00423	EML1	Echinoderm microtubule-associated protein-like 1	0.983787	2.066	0.476181	-1.07042	6.3211e-20	3.39129e-18
P09382	LGALS1	Galectin-1	1.46491	3.10602	0.471637	-1.08425	8.52165e-20	3.39129e-18
P20742	PZP	Pregnancy zone protein	1.44808	3.17605	0.455938	-1.13309	8.29371e-20	3.39129e-18
Q9Y4G6	TLN2	Talin-2	1.35755	2.99081	0.453905	-1.13954	8.52165e-20	3.39129e-18
P40123	CAP2	Adenylyl cyclase-associated protein 2	0.777993	1.71717	0.453067	-1.1422	7.85574e-20	3.39129e-18
O00159	MYO1C	Unconventional myosin-Ic	0.966101	2.13479	0.452551	-1.14385	7.04725e-20	3.39129e-18
Q02153	GUCY1B1	Guanylate cyclase soluble subunit beta-1	1.55997	3.44881	0.45232	-1.14458	8.07179e-20	3.39129e-18
P06681	C2	Complement C2	2.03942	4.54159	0.449055	-1.15504	7.44065e-20	3.39129e-18
P08670	VIM	Vimentin	0.502455	1.13166	0.443998	-1.17137	7.64541e-20	3.39129e-18
P10301	RRAS	Ras-related protein R-Ras	1.1188	2.59186	0.431658	-1.21204	6.67442e-20	3.39129e-18
P22352	GPX3	Glutathione peroxidase 3	1.91562	4.55042	0.420976	-1.24819	6.3211e-20	3.39129e-18
P36269	GGT5	Glutathione hydrolase 5 proenzyme	2.4223	5.78822	0.418487	-1.25675	7.64541e-20	3.39129e-18
Q9BX97	PLVAP	Plasmalemma vesicle-associated protein	2.01762	4.82917	0.417799	-1.25912	8.07179e-20	3.39129e-18
Q63HR2	TNS2	Tensin-2	1.36555	3.33319	0.409683	-1.28742	6.15144e-20	3.39129e-18
P39059	COL15A1	Collagen alpha-1(XV) chain	2.36829	5.84943	0.404876	-1.30445	9.49702e-20	3.39129e-18
Q9NQ79	CRTAC1	Cartilage acidic protein 1	1.68068	4.16506	0.403518	-1.30929	7.44065e-20	3.39129e-18
Q14118	DAG1	Dystroglycan	1.06911	2.6697	0.400459	-1.32027	6.15144e-20	3.39129e-18
Q9UGT4	SUSD2	Sushi domain-containing protein 2	1.76607	4.47092	0.395012	-1.34003	5.98628e-20	3.39129e-18
P0DOX2	nan	Immunoglobulin alpha-2 heavy chain	2.48923	6.35453	0.391725	-1.35209	9.49702e-20	3.39129e-18
Q9BX67	JAM3	Junctional adhesion molecule C	0.678322	1.75807	0.385833	-1.37395	8.29371e-20	3.39129e-18
P02750	LRG1	Leucine-rich alpha-2-glycoprotein	1.61264	4.18094	0.385713	-1.3744	6.3211e-20	3.39129e-18
Q96AC1	FERMT2	Fermitin family homolog 2	0.710456	1.86125	0.381708	-1.38946	7.24131e-20	3.39129e-18
P48740	MASP1	Mannan-binding lectin serine protease 1	1.3032	3.41798	0.381279	-1.39108	6.85833e-20	3.39129e-18
P03952	KLKB1	Plasma kallikrein	1.73939	4.56968	0.380637	-1.39351	7.04725e-20	3.39129e-18
Q96MM6	HSPA12B	Heat shock 70 kDa protein 12B	1.48333	3.8988	0.380457	-1.3942	6.3211e-20	3.39129e-18
Q6EMK4	VASN	Vasorin	0.873977	2.3288	0.37529	-1.41392	7.64541e-20	3.39129e-18
O95865	DDAH2	N(G),N(G)-dimethylarginine dimethylaminohydrolase 2	1.32766	3.54127	0.37491	-1.41538	6.15144e-20	3.39129e-18
Q9HBL0	TNS1	Tensin-1	1.53281	4.10223	0.373652	-1.42023	8.75579e-20	3.39129e-18
P23142	FBLN1	Fibulin-1	2.11956	5.69457	0.372207	-1.42582	6.3211e-20	3.39129e-18
P00746	CFD	Complement factor D	1.58937	4.27904	0.371431	-1.42883	6.3211e-20	3.39129e-18
P35858	IGFALS	Insulin-like growth factor-binding protein complex acid labile subunit	1.98595	5.35701	0.370721	-1.4316	5.98628e-20	3.39129e-18
O95967	EFEMP2	EGF-containing fibulin-like extracellular matrix protein 2	2.25863	6.14893	0.36732	-1.44489	8.75579e-20	3.39129e-18
O43294	TGFB1I1	Transforming growth factor beta-1-induced transcript 1 protein	1.27194	3.5115	0.362222	-1.46506	9.49702e-20	3.39129e-18
P01031	C5	Complement C5	1.83168	5.0802	0.360553	-1.47172	8.99628e-20	3.39129e-18
P05546	SERPIND1	Heparin cofactor 2	1.31751	3.65988	0.359986	-1.47399	7.24131e-20	3.39129e-18
P43652	AFM	Afamin	1.78953	5.00083	0.357847	-1.48258	6.85833e-20	3.39129e-18
P07358	C8B	Complement component C8 beta chain	1.72588	4.85738	0.355311	-1.49284	8.07179e-20	3.39129e-18
P03950	ANG	Angiogenin	2.80001	7.88057	0.355306	-1.49287	6.49539e-20	3.39129e-18
P04275	VWF	von Willebrand factor	1.84752	5.21072	0.354561	-1.49589	6.85833e-20	3.39129e-18
P05156	CFI	Complement factor I	1.90044	5.39655	0.352158	-1.5057	6.49539e-20	3.39129e-18
P05543	SERPINA7	Thyroxine-binding globulin	1.70662	4.84717	0.352085	-1.506	6.3211e-20	3.39129e-18
Q06828	FMOD	Fibromodulin	1.40191	3.98613	0.351698	-1.50759	8.75579e-20	3.39129e-18
P13671	C6	Complement component C6	2.0511	5.87449	0.349153	-1.51807	9.2433e-20	3.39129e-18
P00748	F12	Coagulation factor XII	1.5126	4.38201	0.345184	-1.53456	7.44065e-20	3.39129e-18
P22792	CPN2	Carboxypeptidase N subunit 2	1.53738	4.46545	0.344284	-1.53833	8.29371e-20	3.39129e-18
P01602	IGKV1-5	Immunoglobulin kappa variable 1-5	2.14737	6.24985	0.343587	-1.54125	6.85833e-20	3.39129e-18
P0DOX7	nan	Immunoglobulin kappa light chain	2.14737	6.24985	0.343587	-1.54125	6.85833e-20	3.39129e-18
P04156	PRNP	Major prion protein	2.36984	6.90166	0.343373	-1.54215	5.98628e-20	3.39129e-18
P29622	SERPINA4	Kallistatin	1.72655	5.05191	0.341761	-1.54894	6.15144e-20	3.39129e-18
P01861	IGHG4	Immunoglobulin heavy constant gamma 4	1.78536	5.24106	0.340649	-1.55364	6.85833e-20	3.39129e-18
P36955	SERPINF1	Pigment epithelium-derived factor	2.29623	6.74879	0.340243	-1.55536	7.44065e-20	3.39129e-18
P07360	C8G	Complement component C8 gamma chain	1.54283	4.5395	0.339867	-1.55696	8.29371e-20	3.39129e-18
P01857	IGHG1	Immunoglobulin heavy constant gamma 1	3.37135	9.9671	0.338248	-1.56384	8.52165e-20	3.39129e-18
P0DOX5	nan	Immunoglobulin gamma-1 heavy chain	3.37135	9.9671	0.338248	-1.56384	8.52165e-20	3.39129e-18
P55058	PLTP	Phospholipid transfer protein	1.66195	4.93566	0.336723	-1.57037	6.15144e-20	3.39129e-18
Q01484	ANK2	Ankyrin-2	0.963439	2.86389	0.336409	-1.57171	5.98628e-20	3.39129e-18
Q96PD5	PGLYRP2	N-acetylmuramoyl-L-alanine amidase	1.53978	4.63074	0.332512	-1.58852	5.98628e-20	3.39129e-18
A1L4H1	SSC5D	Soluble scavenger receptor cysteine-rich domain-containing protein SSC5D	1.27786	3.8884	0.328634	-1.60545	9.49702e-20	3.39129e-18
P02766	TTR	Transthyretin	2.19544	6.71761	0.326819	-1.61344	6.15144e-20	3.39129e-18
O95980	RECK	Reversion-inducing cysteine-rich protein with Kazal motifs	1.76081	5.3986	0.32616	-1.61635	5.98628e-20	3.39129e-18
P01009	SERPINA1	Alpha-1-antitrypsin	1.66951	5.13156	0.325342	-1.61997	6.15144e-20	3.39129e-18
P20848	SERPINA2	Putative alpha-1-antitrypsin-related protein	1.66951	5.13156	0.325342	-1.61997	6.15144e-20	3.39129e-18
O43301	HSPA12A	Heat shock 70 kDa protein 12A	1.15479	3.55667	0.324684	-1.62289	5.98628e-20	3.39129e-18
P02647	APOA1	Apolipoprotein A-I	1.86893	5.81779	0.321243	-1.63826	8.75579e-20	3.39129e-18
Q7Z3B1	NEGR1	Neuronal growth regulator 1	0.930486	2.90697	0.320088	-1.64346	6.15144e-20	3.39129e-18
P08648	ITGA5	Integrin alpha-5	0.690162	2.16567	0.318683	-1.64981	7.85574e-20	3.39129e-18
P05090	APOD	Apolipoprotein D	1.72876	5.43043	0.318347	-1.65133	8.52165e-20	3.39129e-18
P05452	CLEC3B	Tetranectin	2.16295	6.81813	0.317236	-1.65637	7.24131e-20	3.39129e-18
P55268	LAMB2	Laminin subunit beta-2	1.43204	4.56161	0.313934	-1.67147	6.85833e-20	3.39129e-18
P20231	TPSB2	Tryptase beta-2	1.78528	5.68682	0.313932	-1.67147	8.75579e-20	3.39129e-18
Q15661	TPSAB1	Tryptase alpha/beta-1	1.78528	5.68682	0.313932	-1.67147	8.75579e-20	3.39129e-18
Q9BZJ3	TPSD1	Tryptase delta	1.78528	5.68682	0.313932	-1.67147	8.75579e-20	3.39129e-18
Q13683	ITGA7	Integrin alpha-7	1.22642	3.90772	0.313845	-1.67188	7.44065e-20	3.39129e-18
Q9NZN4	EHD2	EH domain-containing protein 2	1.43345	4.58248	0.312811	-1.67664	7.04725e-20	3.39129e-18
P25311	AZGP1	Zinc-alpha-2-glycoprotein	1.81351	5.80482	0.312414	-1.67847	6.49539e-20	3.39129e-18
P07357	C8A	Complement component C8 alpha chain	2.19555	7.09071	0.309637	-1.69135	8.52165e-20	3.39129e-18
P09471	GNAO1	Guanine nucleotide-binding protein G(o) subunit alpha	1.4047	4.62551	0.303685	-1.71935	7.64541e-20	3.39129e-18
P11532	DMD	Dystrophin	1.24083	4.09332	0.303134	-1.72197	6.3211e-20	3.39129e-18
P01764	IGHV3-23	Immunoglobulin heavy variable 3-23	3.0654	10.1515	0.301965	-1.72755	8.99628e-20	3.39129e-18
Q9Y281	CFL2	Cofilin-2	0.26668	0.888501	0.300147	-1.73626	9.49702e-20	3.39129e-18
P01019	AGT	Angiotensinogen	1.89944	6.33324	0.299916	-1.73737	6.15144e-20	3.39129e-18
P02774	GC	Vitamin D-binding protein	2.05737	6.89837	0.29824	-1.74546	6.49539e-20	3.39129e-18
B9A064	IGLL5	Immunoglobulin lambda-like polypeptide 5	1.91993	6.45874	0.297261	-1.7502	7.44065e-20	3.39129e-18
P0CG04	IGLC1	Immunoglobulin lambda constant 1	1.91993	6.45874	0.297261	-1.7502	7.44065e-20	3.39129e-18
P0DOX8	nan	Immunoglobulin lambda-1 light chain	1.91993	6.45874	0.297261	-1.7502	7.44065e-20	3.39129e-18
P01024	C3	Complement C3	2.22915	7.54692	0.295372	-1.7594	7.24131e-20	3.39129e-18
P00751	CFB	Complement factor B	2.37	8.04268	0.294678	-1.76279	7.44065e-20	3.39129e-18
P10909	CLU	Clusterin	1.36762	4.66344	0.293265	-1.76973	8.07179e-20	3.39129e-18
P06727	APOA4	Apolipoprotein A-IV	1.48015	5.05527	0.292794	-1.77204	5.98628e-20	3.39129e-18
P18428	LBP	Lipopolysaccharide-binding protein	2.29186	7.85489	0.291775	-1.77707	6.49539e-20	3.39129e-18
O15061	SYNM	Synemin	0.66595	2.2915	0.290617	-1.78281	6.3211e-20	3.39129e-18
P0CF74	IGLC6	Immunoglobulin lambda constant 6	1.81703	6.29129	0.288817	-1.79177	7.85574e-20	3.39129e-18
P0DOY2	IGLC2	Immunoglobulin lambda constant 2	1.81703	6.29129	0.288817	-1.79177	7.85574e-20	3.39129e-18
P0DOY3	IGLC3	Immunoglobulin lambda constant 3	1.81703	6.29129	0.288817	-1.79177	7.85574e-20	3.39129e-18
Q14315	FLNC	Filamin-C	0.833243	2.88877	0.288442	-1.79365	7.04725e-20	3.39129e-18
P08697	SERPINF2	Alpha-2-antiplasmin	1.94315	6.74375	0.288141	-1.79515	8.99628e-20	3.39129e-18
P02790	HPX	Hemopexin	2.04667	7.10785	0.287945	-1.79614	6.15144e-20	3.39129e-18
P04196	HRG	Histidine-rich glycoprotein	2.45315	8.55092	0.286887	-1.80144	8.07179e-20	3.39129e-18
P00734	F2	Prothrombin	1.9156	6.68953	0.286358	-1.80411	7.04725e-20	3.39129e-18
O95810	CAVIN2	Caveolae-associated protein 2	1.30704	4.58882	0.284831	-1.81182	7.44065e-20	3.39129e-18
P51884	LUM	Lumican	1.49964	5.28356	0.283832	-1.81689	7.04725e-20	3.39129e-18
A0A075B6P5	IGKV2-28	Immunoglobulin kappa variable 2-28	2.57176	9.0793	0.283255	-1.81983	8.99628e-20	3.39129e-18
A0A087WW87	IGKV2-40	Immunoglobulin kappa variable 2-40	2.57176	9.0793	0.283255	-1.81983	8.99628e-20	3.39129e-18
P01614	IGKV2D-40	Immunoglobulin kappa variable 2D-40	2.57176	9.0793	0.283255	-1.81983	8.99628e-20	3.39129e-18
P01615	IGKV2D-28	Immunoglobulin kappa variable 2D-28	2.57176	9.0793	0.283255	-1.81983	8.99628e-20	3.39129e-18
P29536	LMOD1	Leiomodin-1	1.77693	6.28204	0.282858	-1.82185	6.85833e-20	3.39129e-18
P12277	CKB	Creatine kinase B-type	0.742446	2.62827	0.282484	-1.82376	6.49539e-20	3.39129e-18
P02749	APOH	Beta-2-glycoprotein 1	3.61682	12.8046	0.282463	-1.82387	7.85574e-20	3.39129e-18
P08294	SOD3	Extracellular superoxide dismutase [Cu-Zn]	0.940909	3.34444	0.281335	-1.82964	5.98628e-20	3.39129e-18
O00339	MATN2	Matrilin-2	1.71711	6.15482	0.278987	-1.84173	6.85833e-20	3.39129e-18
P01008	SERPINC1	Antithrombin-III	2.19329	7.8787	0.278382	-1.84486	5.98628e-20	3.39129e-18
P12111	COL6A3	Collagen alpha-3(VI) chain	1.77216	6.40294	0.276772	-1.85323	8.07179e-20	3.39129e-18
P41219	PRPH	Peripherin	1.23294	4.47221	0.275688	-1.85889	7.24131e-20	3.39129e-18
P00450	CP	Ceruloplasmin	2.20992	8.03697	0.27497	-1.86266	6.49539e-20	3.39129e-18
P01042	KNG1	Kininogen-1	1.93348	7.07263	0.273375	-1.87105	6.3211e-20	3.39129e-18
P21589	NT5E	5'-nucleotidase	1.63895	6.0058	0.272895	-1.87358	6.49539e-20	3.39129e-18
P02748	C9	Complement component C9	2.14071	7.98598	0.268059	-1.89938	7.04725e-20	3.39129e-18
P02765	AHSG	Alpha-2-HS-glycoprotein	1.46255	5.49427	0.266195	-1.90944	6.15144e-20	3.39129e-18
P08185	SERPINA6	Corticosteroid-binding globulin	1.75436	6.59843	0.265875	-1.91118	6.3211e-20	3.39129e-18
P04217	A1BG	Alpha-1B-glycoprotein	2.54413	9.64401	0.263804	-1.92246	6.49539e-20	3.39129e-18
P02787	TF	Serotransferrin	2.01405	7.65149	0.263223	-1.92564	6.3211e-20	3.39129e-18
P01023	A2M	Alpha-2-macroglobulin	1.97672	7.57984	0.260786	-1.93906	6.3211e-20	3.39129e-18
P10643	C7	Complement component C7	1.49635	5.74809	0.260321	-1.94164	5.98628e-20	3.39129e-18
P51888	PRELP	Prolargin	2.32726	8.95135	0.259989	-1.94348	8.29371e-20	3.39129e-18
Q9BW30	TPPP3	Tubulin polymerization-promoting protein family member 3	1.97222	7.6782	0.25686	-1.96095	8.99628e-20	3.39129e-18
P01859	IGHG2	Immunoglobulin heavy constant gamma 2	2.36897	9.353	0.253284	-1.98117	6.15144e-20	3.39129e-18
P56539	CAV3	Caveolin-3	1.57929	6.24657	0.252825	-1.98379	5.98628e-20	3.39129e-18
Q03135	CAV1	Caveolin-1	1.57929	6.24657	0.252825	-1.98379	5.98628e-20	3.39129e-18
P09493	TPM1	Tropomyosin alpha-1 chain	1.22287	4.8806	0.250556	-1.99679	5.98628e-20	3.39129e-18
Q7Z7G0	ABI3BP	Target of Nesh-SH3	1.43145	5.73627	0.249544	-2.00264	6.49539e-20	3.39129e-18
P02760	AMBP	Protein AMBP	1.92521	7.8166	0.246297	-2.02153	5.98628e-20	3.39129e-18
P02768	ALB	Serum albumin	2.35229	9.71878	0.242036	-2.04671	6.49539e-20	3.39129e-18
P12109	COL6A1	Collagen alpha-1(VI) chain	1.57574	6.56869	0.239887	-2.05957	7.85574e-20	3.39129e-18
P68032	ACTC1	Actin, alpha cardiac muscle 1	1.08208	4.54102	0.238291	-2.06921	6.85833e-20	3.39129e-18
P68133	ACTA1	Actin, alpha skeletal muscle	1.08208	4.54102	0.238291	-2.06921	6.85833e-20	3.39129e-18
P20774	OGN	Mimecan	1.32286	5.58092	0.237033	-2.07684	7.24131e-20	3.39129e-18
P07585	DCN	Decorin	1.3589	5.81569	0.233662	-2.09751	5.98628e-20	3.39129e-18
P12110	COL6A2	Collagen alpha-2(VI) chain	1.4598	6.48792	0.225002	-2.15199	6.85833e-20	3.39129e-18
P35749	MYH11	Myosin-11	1.24406	5.81935	0.21378	-2.2258	8.75579e-20	3.39129e-18
Q15124	PGM5	Phosphoglucomutase-like protein 5	1.23402	5.79616	0.212903	-2.23173	6.85833e-20	3.39129e-18
P17661	DES	Desmin	1.2794	6.02748	0.212262	-2.23608	9.49702e-20	3.39129e-18
P22105	TNXB	Tenascin-X	1.29375	6.2457	0.207142	-2.27131	5.98628e-20	3.39129e-18
Q16473	TNXA	Putative tenascin-XA	1.29375	6.2457	0.207142	-2.27131	5.98628e-20	3.39129e-18
Q9NRN5	OLFML3	Olfactomedin-like protein 3	1.46637	7.19887	0.203695	-2.29552	5.98628e-20	3.39129e-18
Q05707	COL14A1	Collagen alpha-1(XIV) chain	1.47023	7.56996	0.19422	-2.36424	5.98628e-20	3.39129e-18
P13591	NCAM1	Neural cell adhesion molecule 1	1.26097	6.51417	0.193574	-2.36904	5.98628e-20	3.39129e-18
Q2UY09	COL28A1	Collagen alpha-1(XXVIII) chain	1.23664	6.46308	0.191339	-2.38579	9.2433e-20	3.39129e-18
Q16853	AOC3	Membrane primary amine oxidase	1.25938	6.59924	0.190837	-2.38959	6.67442e-20	3.39129e-18
Q96AM1	MRGPRF	Mas-related G-protein coupled receptor member F	1.76146	9.48211	0.185767	-2.42844	5.98628e-20	3.39129e-18
Q13642	FHL1	Four and a half LIM domains protein 1	1.17433	7.10917	0.165185	-2.59785	7.24131e-20	3.39129e-18
Q6UWY5	OLFML1	Olfactomedin-like protein 1	1.58785	9.75201	0.162823	-2.61862	6.15144e-20	3.39129e-18
P41222	PTGDS	Prostaglandin-H2 D-isomerase	2.43182	15.0673	0.161397	-2.63131	9.2433e-20	3.39129e-18
Q8WY22	BRI3BP	BRI3-binding protein	1.25532	0.647186	1.93967	0.955808	9.75762e-20	3.42815e-18
Q8IXQ6	PARP9	Protein mono-ADP-ribosyltransferase PARP9	3.09533	1.65823	1.86664	0.900447	1.08726e-19	3.42815e-18
P0DN76	U2AF1L5	Splicing factor U2AF 35 kDa subunit-like protein	0.705937	0.382082	1.84761	0.885659	1.24447e-19	3.42815e-18
Q01081	U2AF1	Splicing factor U2AF 35 kDa subunit	0.705937	0.382082	1.84761	0.885659	1.24447e-19	3.42815e-18
Q8WU68	U2AF1L4	Splicing factor U2AF 26 kDa subunit	0.705937	0.382082	1.84761	0.885659	1.24447e-19	3.42815e-18
Q9Y5S9	RBM8A	RNA-binding protein 8A	0.987967	0.552373	1.78858	0.838819	1.21133e-19	3.42815e-18
P05141	SLC25A5	ADP/ATP translocase 2	1.27748	0.804535	1.58785	0.667077	1.03002e-19	3.42815e-18
Q9H0C2	SLC25A31	ADP/ATP translocase 4	1.27748	0.804535	1.58785	0.667077	1.03002e-19	3.42815e-18
Q15427	SF3B4	Splicing factor 3B subunit 4	0.895884	0.575313	1.55721	0.638964	1.14764e-19	3.42815e-18
O76003	GLRX3	Glutaredoxin-3	0.677973	0.473096	1.43306	0.519094	1.17906e-19	3.42815e-18
Q9BQS8	FYCO1	FYVE and coiled-coil domain-containing protein 1	0.985688	1.44575	0.681781	-0.55262	1.03002e-19	3.42815e-18
Q4KMQ2	ANO6	Anoctamin-6	1.2576	1.90168	0.661307	-0.596608	1.03002e-19	3.42815e-18
Q9BZG1	RAB34	Ras-related protein Rab-34	0.712925	1.11814	0.637597	-0.649284	1.05826e-19	3.42815e-18
Q12765	SCRN1	Secernin-1	1.25996	1.99184	0.632559	-0.660728	1.11705e-19	3.42815e-18
Q9C0E8	LNPK	Endoplasmic reticulum junction formation protein lunapark	1.42392	2.31823	0.614225	-0.703161	1.03002e-19	3.42815e-18
Q9UHG3	PCYOX1	Prenylcysteine oxidase 1	1.61123	2.72284	0.591744	-0.756955	1.14764e-19	3.42815e-18
Q13425	SNTB2	Beta-2-syntrophin	1.41669	2.55132	0.555278	-0.848718	1.24447e-19	3.42815e-18
P16402	HIST1H1D	Histone H1.3	0.1265	0.229068	0.55224	-0.856632	1.14764e-19	3.42815e-18
P18206	VCL	Vinculin	1.02509	1.93267	0.530398	-0.914853	1.17906e-19	3.42815e-18
O00499	BIN1	Myc box-dependent-interacting protein 1	0.76026	1.60799	0.472802	-1.08069	1.05826e-19	3.42815e-18
Q9H497	TOR3A	Torsin-3A	1.25797	2.72929	0.460915	-1.11743	1.11705e-19	3.42815e-18
P00736	C1R	Complement C1r subcomponent	2.81159	6.34176	0.443346	-1.1735	1.03002e-19	3.42815e-18
Q8IUX7	AEBP1	Adipocyte enhancer-binding protein 1	1.77363	4.10951	0.431591	-1.21226	1.17906e-19	3.42815e-18
P54289	CACNA2D1	Voltage-dependent calcium channel subunit alpha-2/delta-1	1.09654	2.54676	0.430562	-1.21571	1.00253e-19	3.42815e-18
O15075	DCLK1	Serine/threonine-protein kinase DCLK1	1.37944	3.42086	0.403244	-1.31028	1.21133e-19	3.42815e-18
O43602	DCX	Neuronal migration protein doublecortin	1.37944	3.42086	0.403244	-1.31028	1.21133e-19	3.42815e-18
Q14624	ITIH4	Inter-alpha-trypsin inhibitor heavy chain H4	1.80792	4.7674	0.379226	-1.39887	1.03002e-19	3.42815e-18
P02655	APOC2	Apolipoprotein C-II	2.09348	5.56771	0.376004	-1.41118	1.03002e-19	3.42815e-18
A0A0C4DH41	IGHV4-61	Immunoglobulin heavy variable 4-61	2.08662	5.56892	0.374691	-1.41623	1.21133e-19	3.42815e-18
P01824	IGHV4-39	Immunoglobulin heavy variable 4-39	2.08662	5.56892	0.374691	-1.41623	1.21133e-19	3.42815e-18
P01825	IGHV4-59	Immunoglobulin heavy variable 4-59	2.08662	5.56892	0.374691	-1.41623	1.21133e-19	3.42815e-18
P06331	IGHV4-34	Immunoglobulin heavy variable 4-34	2.08662	5.56892	0.374691	-1.41623	1.21133e-19	3.42815e-18
P0DP06	IGHV4-30-4	Immunoglobulin heavy variable 4-30-4	2.08662	5.56892	0.374691	-1.41623	1.21133e-19	3.42815e-18
P0DP07	IGHV4-31	Immunoglobulin heavy variable 4-31	2.08662	5.56892	0.374691	-1.41623	1.21133e-19	3.42815e-18
P0DP08	IGHV4-38-2	Immunoglobulin heavy variable 4-38-2	2.08662	5.56892	0.374691	-1.41623	1.21133e-19	3.42815e-18
Q02952	AKAP12	A-kinase anchor protein 12	0.639296	1.74243	0.3669	-1.44654	1.03002e-19	3.42815e-18
A0A0B4J1V1	IGHV3-21	Immunoglobulin heavy variable 3-21	2.29199	6.35513	0.360653	-1.47132	1.24447e-19	3.42815e-18
P01762	IGHV3-11	Immunoglobulin heavy variable 3-11	2.29199	6.35513	0.360653	-1.47132	1.24447e-19	3.42815e-18
P01763	IGHV3-48	Immunoglobulin heavy variable 3-48	2.29199	6.35513	0.360653	-1.47132	1.24447e-19	3.42815e-18
P01780	IGHV3-7	Immunoglobulin heavy variable 3-7	2.29199	6.35513	0.360653	-1.47132	1.24447e-19	3.42815e-18
P11217	PYGM	Glycogen phosphorylase, muscle form	1.0978	3.10628	0.353412	-1.50058	1.24447e-19	3.42815e-18
P01860	IGHG3	Immunoglobulin heavy constant gamma 3	1.89252	5.45399	0.346997	-1.52701	1.05826e-19	3.42815e-18
P35542	SAA4	Serum amyloid A-4 protein	2.00176	5.94402	0.336769	-1.57017	1.14764e-19	3.42815e-18
Q86UX2	ITIH5	Inter-alpha-trypsin inhibitor heavy chain H5	1.20304	3.62576	0.331804	-1.5916	1.21133e-19	3.42815e-18
P05155	SERPING1	Plasma protease C1 inhibitor	1.84929	5.8107	0.318255	-1.65174	1.00253e-19	3.42815e-18
Q15493	RGN	Regucalcin	1.47504	4.67053	0.315818	-1.66283	1.17906e-19	3.42815e-18
A0A0C4DH68	IGKV2-24	Immunoglobulin kappa variable 2-24	2.00896	6.6416	0.30248	-1.72509	1.08726e-19	3.42815e-18
P00747	PLG	Plasminogen	1.92315	6.75516	0.284693	-1.81252	1.11705e-19	3.42815e-18
Q02325	PLGLB1	Plasminogen-like protein B	1.92315	6.75516	0.284693	-1.81252	1.11705e-19	3.42815e-18
Q15195	PLGLA	Plasminogen-like protein A	1.92315	6.75516	0.284693	-1.81252	1.11705e-19	3.42815e-18
P07951	TPM2	Tropomyosin beta chain	1.19456	4.42767	0.269794	-1.89007	1.14764e-19	3.42815e-18
P51911	CNN1	Calponin-1	1.25073	5.01445	0.249426	-2.00332	1.05826e-19	3.42815e-18
Q96Q06	PLIN4	Perilipin-4	1.04709	4.89518	0.213903	-2.22497	1.14764e-19	3.42815e-18
P55083	MFAP4	Microfibril-associated glycoprotein 4	1.73188	8.95846	0.193324	-2.37091	1.11705e-19	3.42815e-18
Q06210	GFPT1	Glutamine--fructose-6-phosphate aminotransferase [isomerizing] 1	1.04303	0.62075	1.68027	0.748696	1.27851e-19	3.43772e-18
P39060	COL18A1	Collagen alpha-1(XVIII) chain	2.19097	5.27567	0.415297	-1.26779	1.27851e-19	3.43772e-18
P0C0L5	C4B	Complement C4-B	2.35354	6.40062	0.367705	-1.44338	1.27851e-19	3.43772e-18
O43866	CD5L	CD5 antigen-like	2.44197	6.8052	0.358839	-1.47859	1.27851e-19	3.43772e-18
P08603	CFH	Complement factor H	2.41124	6.7884	0.3552	-1.4933	1.27851e-19	3.43772e-18
P01011	SERPINA3	Alpha-1-antichymotrypsin	2.49385	8.96137	0.278289	-1.84534	1.27851e-19	3.43772e-18
P35249	RFC4	Replication factor C subunit 4	0.664013	0.389752	1.70368	0.768656	1.31347e-19	3.49001e-18
P46821	MAP1B	Microtubule-associated protein 1B	0.225765	0.538664	0.419121	-1.25456	1.31347e-19	3.49001e-18
Q12860	CNTN1	Contactin-1	1.89925	4.54181	0.418171	-1.25784	1.31347e-19	3.49001e-18
P25205	MCM3	DNA replication licensing factor MCM3	0.863628	0.439628	1.96445	0.974127	1.34938e-19	3.51619e-18
Q01082	SPTBN1	Spectrin beta chain, non-erythrocytic 1	0.786578	1.2732	0.617798	-0.694792	1.34938e-19	3.51619e-18
P07225	PROS1	Vitamin K-dependent protein S	1.63274	4.05467	0.402682	-1.31229	1.34938e-19	3.51619e-18
P04114	APOB	Apolipoprotein B-100	1.99164	5.82578	0.341867	-1.54849	1.34938e-19	3.51619e-18
P22413	ENPP1	Ectonucleotide pyrophosphatase/phosphodiesterase family member 1	1.1902	3.51687	0.338425	-1.56309	1.34938e-19	3.51619e-18
Q13884	SNTB1	Beta-1-syntrophin	1.30219	2.5372	0.513239	-0.962298	1.38625e-19	3.51722e-18
P01876	IGHA1	Immunoglobulin heavy constant alpha 1	2.28718	6.04779	0.378183	-1.40284	1.38625e-19	3.51722e-18
Q9UMS6	SYNPO2	Synaptopodin-2	1.5118	4.00043	0.377911	-1.40388	1.38625e-19	3.51722e-18
Q03591	CFHR1	Complement factor H-related protein 1	2.80958	8.45931	0.332128	-1.59019	1.38625e-19	3.51722e-18
P55899	FCGRT	IgG receptor FcRn large subunit p51	1.40859	4.69545	0.299991	-1.73701	1.38625e-19	3.51722e-18
P01782	IGHV3-9	Immunoglobulin heavy variable 3-9	3.83701	14.871	0.25802	-1.95444	1.38625e-19	3.51722e-18
P33991	MCM4	DNA replication licensing factor MCM4	0.800647	0.418079	1.91506	0.937389	1.46301e-19	3.53428e-18
Q9UBS4	DNAJB11	DnaJ homolog subfamily B member 11	1.71561	0.912242	1.88066	0.911236	1.50295e-19	3.53428e-18
Q6PH85	DCUN1D2	DCN1-like protein 2	1.13338	0.664589	1.70539	0.770103	1.50295e-19	3.53428e-18
Q96GG9	DCUN1D1	DCN1-like protein 1	1.13338	0.664589	1.70539	0.770103	1.50295e-19	3.53428e-18
P40222	TXLNA	Alpha-taxilin	0.842755	0.540414	1.55946	0.641049	1.46301e-19	3.53428e-18
P49915	GMPS	GMP synthase [glutamine-hydrolyzing]	0.699836	0.461576	1.51619	0.600448	1.42412e-19	3.53428e-18
Q00577	PURA	Transcriptional activator protein Pur-alpha	2.06221	3.38114	0.609916	-0.713319	1.46301e-19	3.53428e-18
P35611	ADD1	Alpha-adducin	1.2684	2.5804	0.491551	-1.02459	1.46301e-19	3.53428e-18
O75882	ATRN	Attractin	1.30175	2.65635	0.490053	-1.02899	1.50295e-19	3.53428e-18
Q96F85	CNRIP1	CB1 cannabinoid receptor-interacting protein 1	1.65997	3.55646	0.466748	-1.09928	1.50295e-19	3.53428e-18
P51636	CAV2	Caveolin-2	1.33732	2.95194	0.453033	-1.14231	1.42412e-19	3.53428e-18
P09871	C1S	Complement C1s subcomponent	2.77242	6.37133	0.43514	-1.20045	1.42412e-19	3.53428e-18
P00740	F9	Coagulation factor IX	1.76666	4.81074	0.367232	-1.44524	1.50295e-19	3.53428e-18
O94875	SORBS2	Sorbin and SH3 domain-containing protein 2	0.996866	3.10572	0.320978	-1.63945	1.42412e-19	3.53428e-18
Q9HCB6	SPON1	Spondin-1	1.51801	5.03338	0.301588	-1.72935	1.50295e-19	3.53428e-18
A0A0C4DH31	IGHV1-18	Immunoglobulin heavy variable 1-18	2.90199	10.0473	0.288833	-1.79169	1.46301e-19	3.53428e-18
P00742	F10	Coagulation factor X	1.47736	5.8531	0.252406	-1.98618	1.50295e-19	3.53428e-18
Q13361	MFAP5	Microfibrillar-associated protein 5	1.86955	7.59221	0.246246	-2.02183	1.42412e-19	3.53428e-18
P15088	CPA3	Mast cell carboxypeptidase A	1.62548	6.77976	0.239754	-2.06037	1.46301e-19	3.53428e-18
Q14BN4	SLMAP	Sarcolemmal membrane-associated protein	1.31157	2.5539	0.513554	-0.961414	1.54396e-19	3.61813e-18
Q14520	HABP2	Hyaluronan-binding protein 2	1.17522	2.95238	0.398059	-1.32895	1.58609e-19	3.6912e-18
P02652	APOA2	Apolipoprotein A-II	2.23776	7.48802	0.298845	-1.74253	1.58609e-19	3.6912e-18
Q9Y2S2	CRYL1	Lambda-crystallin homolog	1.58017	3.05233	0.517695	-0.949826	1.62934e-19	3.7659e-18
P17252	PRKCA	Protein kinase C alpha type	0.785263	1.62966	0.481857	-1.05332	1.62934e-19	3.7659e-18
P55769	SNU13	NHP2-like protein 1	0.776317	0.503562	1.54165	0.624476	1.67377e-19	3.8163e-18
A0A0C4DH25	IGKV3D-20	Immunoglobulin kappa variable 3D-20	2.79417	8.01863	0.34846	-1.52094	1.67377e-19	3.8163e-18
P01619	IGKV3-20	Immunoglobulin kappa variable 3-20	2.79417	8.01863	0.34846	-1.52094	1.67377e-19	3.8163e-18
A0M8Q6	IGLC7	Immunoglobulin lambda constant 7	1.90915	6.72272	0.283985	-1.81611	1.67377e-19	3.8163e-18
P55265	ADAR	Double-stranded RNA-specific adenosine deaminase	0.870861	0.586802	1.48408	0.569569	1.71939e-19	3.81715e-18
P31689	DNAJA1	DnaJ homolog subfamily A member 1	0.616676	0.425446	1.44948	0.535537	1.71939e-19	3.81715e-18
P10768	ESD	S-formylglutathione hydrolase	1.45525	2.35409	0.618179	-0.693903	1.71939e-19	3.81715e-18
A0A0C4DH29	IGHV1-3	Immunoglobulin heavy variable 1-3	2.55683	6.22338	0.410843	-1.28334	1.71939e-19	3.81715e-18
Q63ZY3	KANK2	KN motif and ankyrin repeat domain-containing protein 2	1.22322	3.11995	0.392063	-1.35084	1.71939e-19	3.81715e-18
Q9BX66	SORBS1	Sorbin and SH3 domain-containing protein 1	1.62963	4.81789	0.338247	-1.56385	1.71939e-19	3.81715e-18
A0A075B6I9	IGLV7-46	Immunoglobulin lambda variable 7-46	2.29886	7.05309	0.325937	-1.61734	1.71939e-19	3.81715e-18
Q15746	MYLK	Myosin light chain kinase, smooth muscle	1.94303	6.60024	0.294388	-1.76421	1.71939e-19	3.81715e-18
Q9Y3B4	SF3B6	Splicing factor 3B subunit 6	0.798577	0.491931	1.62335	0.698976	1.76623e-19	3.88284e-18
Q9Y5M8	SRPRB	Signal recognition particle receptor subunit beta	1.19935	0.800981	1.49735	0.582409	1.76623e-19	3.88284e-18
P19823	ITIH2	Inter-alpha-trypsin inhibitor heavy chain H2	2.01241	5.1381	0.391664	-1.35231	1.76623e-19	3.88284e-18
Q15811	ITSN1	Intersectin-1	0.763022	1.14843	0.664407	-0.589861	1.81434e-19	3.91214e-18
P00387	CYB5R3	NADH-cytochrome b5 reductase 3	1.3835	2.18076	0.634413	-0.656507	1.81434e-19	3.91214e-18
Q9HCU0	CD248	Endosialin	1.36917	3.64404	0.375728	-1.41224	1.81434e-19	3.91214e-18
P15169	CPN1	Carboxypeptidase N catalytic chain	1.66459	4.84671	0.343448	-1.54184	1.81434e-19	3.91214e-18
P00325	ADH1B	All-trans-retinol dehydrogenase [NAD(+)] ADH1B	1.30918	6.46062	0.20264	-2.30301	1.81434e-19	3.91214e-18
Q8N5K1	CISD2	CDGSH iron-sulfur domain-containing protein 2	1.3077	0.7783	1.6802	0.748634	1.86375e-19	3.94308e-18
Q16576	RBBP7	Histone-binding protein RBBP7	0.548355	0.372841	1.47075	0.55655	1.86375e-19	3.94308e-18
Q9Y383	LUC7L2	Putative RNA-binding protein Luc7-like 2	0.547324	0.377201	1.45101	0.53706	1.86375e-19	3.94308e-18
Q9HAU0	PLEKHA5	Pleckstrin homology domain-containing family A member 5	0.766942	1.32179	0.580232	-0.785299	1.86375e-19	3.94308e-18
Q96P44	COL21A1	Collagen alpha-1(XXI) chain	1.29447	3.53296	0.366399	-1.44851	1.86375e-19	3.94308e-18
O60504	SORBS3	Vinexin	1.23557	2.05232	0.602036	-0.732078	1.91448e-19	4.01267e-18
P63261	ACTG1	Actin, cytoplasmic 2	1.1892	2.35225	0.505558	-0.984051	1.91448e-19	4.01267e-18
Q99707	MTR	Methionine synthase	0.657619	1.04649	0.628404	-0.670235	2.02007e-19	4.13135e-18
Q9Y2J2	EPB41L3	Band 4.1-like protein 3	2.46609	3.97109	0.621012	-0.687307	2.02007e-19	4.13135e-18
Q6ZMZ3	SYNE3	Nesprin-3	1.72088	3.0014	0.573358	-0.802492	2.02007e-19	4.13135e-18
O00391	QSOX1	Sulfhydryl oxidase 1	1.43147	2.99241	0.478365	-1.06382	2.02007e-19	4.13135e-18
Q0ZGT2	NEXN	Nexilin	0.959844	2.20247	0.435803	-1.19825	2.02007e-19	4.13135e-18
P05413	FABP3	Fatty acid-binding protein, heart	1.38014	4.29021	0.321695	-1.63624	2.02007e-19	4.13135e-18
P27169	PON1	Serum paraoxonase/arylesterase 1	1.621	5.47303	0.296179	-1.75546	2.02007e-19	4.13135e-18
O15533	TAPBP	Tapasin	3.97922	1.90445	2.08943	1.06311	2.075e-19	4.21813e-18
P05198	EIF2S1	Eukaryotic translation initiation factor 2 subunit 1	0.640508	0.43337	1.47797	0.563617	2.075e-19	4.21813e-18
P09417	QDPR	Dihydropteridine reductase	1.07508	1.5797	0.680559	-0.555209	2.13141e-19	4.31979e-18
P98194	ATP2C1	Calcium-transporting ATPase type 2C member 1	1.40969	0.930626	1.51477	0.5991	2.24882e-19	4.51704e-18
Q8N2S1	LTBP4	Latent-transforming growth factor beta-binding protein 4	1.66529	4.02328	0.413914	-1.2726	2.24882e-19	4.51704e-18
P43121	MCAM	Cell surface glycoprotein MUC18	1.00483	2.80628	0.358064	-1.48171	2.24882e-19	4.51704e-18
Q9NRY6	PLSCR3	Phospholipid scramblase 3	1.36761	2.15832	0.633644	-0.658255	2.30989e-19	4.59866e-18
P27338	MAOB	Amine oxidase [flavin-containing] B	1.88334	4.44771	0.423439	-1.23977	2.30989e-19	4.59866e-18
Q15113	PCOLCE	Procollagen C-endopeptidase enhancer 1	1.99819	6.28468	0.317946	-1.65315	2.30989e-19	4.59866e-18
O43813	LANCL1	Glutathione S-transferase LANCL1	0.694828	1.0559	0.658044	-0.603744	2.437e-19	4.83745e-18
Q16798	ME3	NADP-dependent malic enzyme, mitochondrial	1.15986	2.03049	0.571222	-0.807876	2.57102e-19	5.08851e-18
P33992	MCM5	DNA replication licensing factor MCM5	0.925594	0.482819	1.91706	0.938896	2.64073e-19	5.16588e-18
Q9HB71	CACYBP	Calcyclin-binding protein	0.595808	0.372675	1.59873	0.676929	2.64073e-19	5.16588e-18
P55290	CDH13	Cadherin-13	1.40992	4.29996	0.327891	-1.60871	2.64073e-19	5.16588e-18
P00738	HP	Haptoglobin	2.07411	7.43906	0.278813	-1.84263	2.64073e-19	5.16588e-18
Q68DU8	KCTD16	BTB/POZ domain-containing protein KCTD16	1.77319	3.00908	0.589279	-0.762977	2.71231e-19	5.21521e-18
Q6ZWB6	KCTD8	BTB/POZ domain-containing protein KCTD8	1.77319	3.00908	0.589279	-0.762977	2.71231e-19	5.21521e-18
Q96CX2	KCTD12	BTB/POZ domain-containing protein KCTD12	1.77319	3.00908	0.589279	-0.762977	2.71231e-19	5.21521e-18
P05154	SERPINA5	Plasma serine protease inhibitor	1.65243	4.40761	0.374903	-1.41541	2.71231e-19	5.21521e-18
Q92629	SGCD	Delta-sarcoglycan	1.57925	5.16762	0.305605	-1.71026	2.71231e-19	5.21521e-18
P23946	CMA1	Chymase	1.71388	6.96264	0.246154	-2.02237	2.71231e-19	5.21521e-18
P11387	TOP1	DNA topoisomerase 1	0.540189	0.321031	1.68267	0.750751	2.86127e-19	5.34923e-18
Q969P6	TOP1MT	DNA topoisomerase I, mitochondrial	0.540189	0.321031	1.68267	0.750751	2.86127e-19	5.34923e-18
P38405	GNAL	Guanine nucleotide-binding protein G(olf) subunit alpha	1.01835	1.55008	0.65697	-0.6061	2.86127e-19	5.34923e-18
P63092	GNAS	Guanine nucleotide-binding protein G(s) subunit alpha isoforms short	1.01835	1.55008	0.65697	-0.6061	2.86127e-19	5.34923e-18
Q5JWF2	GNAS	Guanine nucleotide-binding protein G(s) subunit alpha isoforms XLas	1.01835	1.55008	0.65697	-0.6061	2.86127e-19	5.34923e-18
Q16352	INA	Alpha-internexin	0.100027	0.19275	0.518948	-0.946339	2.86127e-19	5.34923e-18
Q7Z5L7	PODN	Podocan	1.22065	2.68848	0.45403	-1.13914	2.93875e-19	5.43388e-18
Q9Y646	CPQ	Carboxypeptidase Q	1.99427	4.64548	0.429293	-1.21997	2.93875e-19	5.43388e-18
P62847	RPS24	40S ribosomal protein S24	0.468732	0.288702	1.62358	0.699182	3.01831e-19	5.50556e-18
Q8WTS6	SETD7	Histone-lysine N-methyltransferase SETD7	0.946052	1.55614	0.607946	-0.717984	3.01831e-19	5.50556e-18
Q13332	PTPRS	Receptor-type tyrosine-protein phosphatase S	1.36651	2.88889	0.473024	-1.08001	3.01831e-19	5.50556e-18
Q13418	ILK	Integrin-linked protein kinase	1.28239	2.71783	0.471844	-1.08362	3.01831e-19	5.50556e-18
P0DP04	IGHV3-43D	Immunoglobulin heavy variable 3-43D	3.83701	14.871	0.25802	-1.95444	3.01831e-19	5.50556e-18
Q12805	EFEMP1	EGF-containing fibulin-like extracellular matrix protein 1	2.297	6.11885	0.375397	-1.41351	3.09999e-19	5.63931e-18
A6NIZ1	nan	Ras-related protein Rap-1b-like protein	1.02122	1.50034	0.680655	-0.555005	3.18386e-19	5.74542e-18
P61224	RAP1B	Ras-related protein Rap-1b	1.02122	1.50034	0.680655	-0.555005	3.18386e-19	5.74542e-18
P26447	S100A4	Protein S100-A4	1.34974	2.67368	0.504826	-0.986143	3.18386e-19	5.74542e-18
Q14185	DOCK1	Dedicator of cytokinesis protein 1	1.39475	2.01795	0.691174	-0.532879	3.26996e-19	5.85384e-18
P02656	APOC3	Apolipoprotein C-III	3.16074	7.71928	0.409461	-1.2882	3.26996e-19	5.85384e-18
P02671	FGA	Fibrinogen alpha chain	2.34599	7.56678	0.310038	-1.68948	3.26996e-19	5.85384e-18
O95232	LUC7L3	Luc7-like protein 3	0.628113	0.397253	1.58114	0.660968	3.35837e-19	5.93341e-18
Q09028	RBBP4	Histone-binding protein RBBP4	0.705721	0.457607	1.5422	0.624987	3.35837e-19	5.93341e-18
P84090	ERH	Enhancer of rudimentary homolog	0.780515	0.547507	1.42558	0.511548	3.35837e-19	5.93341e-18
P19525	EIF2AK2	Interferon-induced, double-stranded RNA-activated protein kinase	1.06968	0.616356	1.7355	0.795349	3.44914e-19	6.04629e-18
Q93052	LPP	Lipoma-preferred partner	1.34695	3.00599	0.448088	-1.15815	3.44914e-19	6.04629e-18
Q9H7C9	AAMDC	Mth938 domain-containing protein	0.862028	1.339	0.643783	-0.635355	3.54233e-19	6.16164e-18
P48059	LIMS1	LIM and senescent cell antigen-like-containing domain protein 1	1.2897	2.18789	0.589471	-0.762506	3.54233e-19	6.16164e-18
Q9UBI6	GNG12	Guanine nucleotide-binding protein G(I)/G(S)/G(O) subunit gamma-12	0.950349	1.65547	0.574067	-0.80071	3.54233e-19	6.16164e-18
P28906	CD34	Hematopoietic progenitor cell antigen CD34	1.63829	7.0123	0.233631	-2.09769	3.638e-19	6.31179e-18
P42224	STAT1	Signal transducer and activator of transcription 1-alpha/beta	2.55049	1.23516	2.06491	1.04608	3.83708e-19	6.60624e-18
Q14515	SPARCL1	SPARC-like protein 1	1.85049	4.55571	0.40619	-1.29977	3.83708e-19	6.60624e-18
P49736	MCM2	DNA replication licensing factor MCM2	0.881509	0.440837	1.99963	0.999731	3.94062e-19	6.73297e-18
Q16363	LAMA4	Laminin subunit alpha-4	1.90541	4.71235	0.404344	-1.30634	3.94062e-19	6.73297e-18
P53708	ITGA8	Integrin alpha-8	1.49423	3.95753	0.377566	-1.4052	3.94062e-19	6.73297e-18
Q9BTV4	TMEM43	Transmembrane protein 43	1.45964	2.15313	0.677915	-0.560823	4.15604e-19	7.04751e-18
Q9UEY8	ADD3	Gamma-adducin	1.55436	3.13153	0.496359	-1.01055	4.15604e-19	7.04751e-18
O14558	HSPB6	Heat shock protein beta-6	1.3559	3.84438	0.352696	-1.5035	4.15604e-19	7.04751e-18
P35555	FBN1	Fibrillin-1	2.24614	6.17933	0.363492	-1.46	4.26807e-19	7.21935e-18
Q13976	PRKG1	cGMP-dependent protein kinase 1	2.4951	5.95668	0.418875	-1.25541	4.38309e-19	7.39537e-18
Q99615	DNAJC7	DnaJ homolog subfamily C member 7	0.562098	0.391381	1.43619	0.522249	4.50117e-19	7.53806e-18
Q8NF91	SYNE1	Nesprin-1	1.11251	1.75178	0.635077	-0.654997	4.50117e-19	7.53806e-18
Q14435	GALNT3	Polypeptide N-acetylgalactosaminyltransferase 3	2.65073	1.32749	1.9968	0.997693	4.62238e-19	7.68386e-18
P19652	ORM2	Alpha-1-acid glycoprotein 2	1.85618	5.37543	0.345308	-1.53405	4.62238e-19	7.68386e-18
P00352	ALDH1A1	Retinal dehydrogenase 1	2.6296	7.06286	0.372314	-1.42541	4.74683e-19	7.85204e-18
P02763	ORM1	Alpha-1-acid glycoprotein 1	1.98888	7.08965	0.280532	-1.83376	4.74683e-19	7.85204e-18
P61923	COPZ1	Coatomer subunit zeta-1	0.722418	0.457814	1.57797	0.658072	4.87458e-19	8.02403e-18
Q53GG5	PDLIM3	PDZ and LIM domain protein 3	1.2536	4.07667	0.307506	-1.70131	4.87458e-19	8.02403e-18
Q9H2D6	TRIOBP	TRIO and F-actin-binding protein	1.35135	2.18472	0.618545	-0.693049	5.00572e-19	8.1603e-18
Q9NVA2	SEPTIN11	Septin-11	1.09456	1.8158	0.602795	-0.730259	5.00572e-19	8.1603e-18
O76074	PDE5A	cGMP-specific 3',5'-cyclic phosphodiesterase	1.6515	3.89919	0.423549	-1.2394	5.00572e-19	8.1603e-18
P41180	CASR	Extracellular calcium-sensing receptor	1.6515	3.89919	0.423549	-1.2394	5.00572e-19	8.1603e-18
Q9Y3B2	EXOSC1	Exosome complex component CSL4	0.449963	0.252976	1.77867	0.830803	5.14035e-19	8.26006e-18
Q08257	CRYZ	Quinone oxidoreductase	0.981873	1.71825	0.571439	-0.80733	5.14035e-19	8.26006e-18
Q9H4G4	GLIPR2	Golgi-associated plant pathogenesis-related protein 1	1.63175	3.3103	0.492931	-1.02054	5.14035e-19	8.26006e-18
P01772	IGHV3-33	Immunoglobulin heavy variable 3-33	2.23681	6.5499	0.341503	-1.55003	5.14035e-19	8.26006e-18
P0DP02	IGHV3-30-3	Immunoglobulin heavy variable 3-30-3	2.23681	6.5499	0.341503	-1.55003	5.14035e-19	8.26006e-18
Q01995	TAGLN	Transgelin	1.28967	4.40025	0.293089	-1.77059	5.27856e-19	8.42198e-18
Q460N5	PARP14	Protein mono-ADP-ribosyltransferase PARP14	2.82193	1.61418	1.74821	0.805879	5.42043e-19	8.56733e-18
Q9BXW6	OSBPL1A	Oxysterol-binding protein-related protein 1	1.16077	1.90595	0.609022	-0.715433	5.42043e-19	8.56733e-18
P98160	HSPG2	Basement membrane-specific heparan sulfate proteoglycan core protein	1.97585	4.36582	0.452573	-1.14378	5.42043e-19	8.56733e-18
Q7Z304	MAMDC2	MAM domain-containing protein 2	1.28961	3.14743	0.409735	-1.28724	5.86905e-19	9.21168e-18
P53701	HCCS	Cytochrome c-type heme lyase	0.689078	0.415075	1.66013	0.731294	6.02659e-19	9.41516e-18
Q8IW45	NAXD	ATP-dependent (S)-NAD(P)H-hydrate dehydratase	1.54337	2.61926	0.589238	-0.763077	6.02659e-19	9.41516e-18
Q06033	ITIH3	Inter-alpha-trypsin inhibitor heavy chain H3	1.41752	2.93788	0.482497	-1.05141	6.18831e-19	9.64547e-18
Q13247	SRSF6	Serine/arginine-rich splicing factor 6	0.689372	0.436377	1.57976	0.659707	6.35431e-19	9.88139e-18
Q9Y639	NPTN	Neuroplastin	1.73781	3.2276	0.538423	-0.893187	6.52471e-19	1.00998e-17
Q13228	SELENBP1	Methanethiol oxidase	1.53487	4.64536	0.33041	-1.59767	6.52471e-19	1.00998e-17
P43304	GPD2	Glycerol-3-phosphate dehydrogenase, mitochondrial	2.27089	1.38578	1.6387	0.712555	6.69962e-19	1.02763e-17
Q9NR30	DDX21	Nucleolar RNA helicase 2	0.437744	0.306301	1.42913	0.515138	6.69962e-19	1.02763e-17
P05556	ITGB1	Integrin beta-1	0.999424	1.92828	0.518298	-0.948146	6.69962e-19	1.02763e-17
P01591	JCHAIN	Immunoglobulin J chain	2.03486	5.20381	0.391032	-1.35464	6.69962e-19	1.02763e-17
P52701	MSH6	DNA mismatch repair protein Msh6	1.25332	0.77474	1.61773	0.693967	6.87916e-19	1.04566e-17
Q01433	AMPD2	AMP deaminase 2	0.73167	1.07043	0.683526	-0.548932	6.87916e-19	1.04566e-17
P16284	PECAM1	Platelet endothelial cell adhesion molecule	2.74284	5.17371	0.530149	-0.915529	7.06345e-19	1.07126e-17
P11216	PYGB	Glycogen phosphorylase, brain form	1.16542	2.17876	0.534901	-0.902656	7.25262e-19	1.09503e-17
Q6UXB8	PI16	Peptidase inhibitor 16	1.05702	4.65904	0.226875	-2.14003	7.25262e-19	1.09503e-17
Q8TEM1	NUP210	Nuclear pore membrane glycoprotein 210	1.04415	0.631801	1.65265	0.724784	7.44679e-19	1.10946e-17
Q99986	VRK1	Serine/threonine-protein kinase VRK1	0.751226	0.503784	1.49117	0.57644	7.44679e-19	1.10946e-17
P59768	GNG2	Guanine nucleotide-binding protein G(I)/G(S)/G(O) subunit gamma-2	2.44802	3.88607	0.629947	-0.666697	7.44679e-19	1.10946e-17
P27487	DPP4	Dipeptidyl peptidase 4	1.65807	3.57233	0.464142	-1.10736	7.44679e-19	1.10946e-17
P19827	ITIH1	Inter-alpha-trypsin inhibitor heavy chain H1	2.98711	7.84127	0.380947	-1.39234	7.44679e-19	1.10946e-17
Q14643	ITPR1	Inositol 1,4,5-trisphosphate receptor type 1	0.946598	1.47771	0.640584	-0.64254	7.64609e-19	1.13166e-17
P49746	THBS3	Thrombospondin-3	1.15261	2.49316	0.462308	-1.11307	7.64609e-19	1.13166e-17
Q16647	PTGIS	Prostacyclin synthase	1.4598	3.89599	0.374694	-1.41622	7.85066e-19	1.15939e-17
Q6UXV4	APOOL	MICOS complex subunit MIC27	1.096	1.60148	0.684366	-0.54716	8.06063e-19	1.18264e-17
P01880	IGHD	Immunoglobulin heavy constant delta	1.31988	3.05218	0.43244	-1.20943	8.06063e-19	1.18264e-17
Q7Z4I7	LIMS2	LIM and senescent cell antigen-like-containing domain protein 2	0.952903	3.83462	0.2485	-2.00868	8.06063e-19	1.18264e-17
P52630	STAT2	Signal transducer and activator of transcription 2	2.76129	1.55869	1.77155	0.825009	8.27615e-19	1.2012e-17
P45973	CBX5	Chromobox protein homolog 5	0.535652	0.327824	1.63396	0.708374	8.27615e-19	1.2012e-17
P04004	VTN	Vitronectin	1.74609	4.76458	0.366473	-1.44822	8.27615e-19	1.2012e-17
P32004	L1CAM	Neural cell adhesion molecule L1	0.240715	0.692001	0.347854	-1.52345	8.27615e-19	1.2012e-17
Q9BXN1	ASPN	Asporin	1.59565	5.42164	0.294311	-1.76459	8.27615e-19	1.2012e-17
P33993	MCM7	DNA replication licensing factor MCM7	0.870003	0.434455	2.00251	1.00181	8.49736e-19	1.22018e-17
O94921	CDK14	Cyclin-dependent kinase 14	0.552162	0.35696	1.54684	0.629328	8.49736e-19	1.22018e-17
P24941	CDK2	Cyclin-dependent kinase 2	0.552162	0.35696	1.54684	0.629328	8.49736e-19	1.22018e-17
Q96Q40	CDK15	Cyclin-dependent kinase 15	0.552162	0.35696	1.54684	0.629328	8.49736e-19	1.22018e-17
Q99719	SEPTIN5	Septin-5	0.916714	1.91273	0.47927	-1.06109	8.49736e-19	1.22018e-17
P35250	RFC2	Replication factor C subunit 2	0.732722	0.505465	1.4496	0.535654	8.72441e-19	1.24748e-17
O15484	CAPN5	Calpain-5	1.20022	3.0948	0.387819	-1.36655	8.72441e-19	1.24748e-17
Q9Y6K5	OAS3	2'-5'-oligoadenylate synthase 3	2.39707	1.44299	1.66118	0.73221	8.95744e-19	1.2754e-17
O14579	COPE	Coatomer subunit epsilon	0.869916	0.559007	1.55618	0.638009	8.95744e-19	1.2754e-17
Q63HN8	RNF213	E3 ubiquitin-protein ligase RNF213	2.4026	1.41916	1.69297	0.759554	9.19662e-19	1.30122e-17
Q9NR12	PDLIM7	PDZ and LIM domain protein 7	0.878089	2.33112	0.376682	-1.40858	9.19662e-19	1.30122e-17
P02675	FGB	Fibrinogen beta chain	1.91072	5.52995	0.345522	-1.53315	9.19662e-19	1.30122e-17
P22090	RPS4Y1	40S ribosomal protein S4, Y isoform 1	0.621501	0.428977	1.4488	0.534854	9.44211e-19	1.32209e-17
P62701	RPS4X	40S ribosomal protein S4, X isoform	0.621501	0.428977	1.4488	0.534854	9.44211e-19	1.32209e-17
Q8TD47	RPS4Y2	40S ribosomal protein S4, Y isoform 2	0.621501	0.428977	1.4488	0.534854	9.44211e-19	1.32209e-17
P21291	CSRP1	Cysteine and glycine-rich protein 1	0.767172	2.58502	0.296776	-1.75255	9.44211e-19	1.32209e-17
P56282	POLE2	DNA polymerase epsilon subunit 2	0.491721	0.249112	1.9739	0.981049	9.95267e-19	1.38496e-17
P61289	PSME3	Proteasome activator complex subunit 3	0.35488	0.230823	1.53746	0.620545	9.95267e-19	1.38496e-17
O60879	DIAPH2	Protein diaphanous homolog 2	0.796653	1.37021	0.581411	-0.782369	9.95267e-19	1.38496e-17
Q13185	CBX3	Chromobox protein homolog 3	0.848081	0.5982	1.41772	0.503574	1.02181e-18	1.41605e-17
P62070	RRAS2	Ras-related protein R-Ras2	0.798583	1.19839	0.666379	-0.585585	1.04905e-18	1.44786e-17
P62995	TRA2B	Transformer-2 protein homolog beta	1.17793	0.804742	1.46374	0.549659	1.077e-18	1.46842e-17
Q9ULA0	DNPEP	Aspartyl aminopeptidase	1.97521	2.89077	0.683283	-0.549445	1.077e-18	1.46842e-17
P00441	SOD1	Superoxide dismutase [Cu-Zn]	0.870923	1.37097	0.635263	-0.654575	1.077e-18	1.46842e-17
Q15404	RSU1	Ras suppressor protein 1	1.15871	1.83316	0.632083	-0.661815	1.077e-18	1.46842e-17
Q9P258	RCC2	Protein RCC2	0.98572	0.604471	1.63071	0.705505	1.1057e-18	1.48949e-17
O95347	SMC2	Structural maintenance of chromosomes protein 2	0.43124	0.296495	1.45446	0.540486	1.1057e-18	1.48949e-17
P48681	NES	Nestin	1.00335	1.97066	0.509144	-0.973854	1.1057e-18	1.48949e-17
P53814	SMTN	Smoothelin	0.962626	2.6472	0.36364	-1.45942	1.1057e-18	1.48949e-17
P09651	HNRNPA1	Heterogeneous nuclear ribonucleoprotein A1	0.748418	0.512547	1.4602	0.546161	1.13514e-18	1.52005e-17
Q32P51	HNRNPA1L2	Heterogeneous nuclear ribonucleoprotein A1-like 2	0.748418	0.512547	1.4602	0.546161	1.13514e-18	1.52005e-17
P09874	PARP1	Poly [ADP-ribose] polymerase 1	0.676162	0.471225	1.4349	0.520954	1.13514e-18	1.52005e-17
Q15181	PPA1	Inorganic pyrophosphatase	0.968162	0.610132	1.58681	0.666128	1.16536e-18	1.55435e-17
Q15274	QPRT	Nicotinate-nucleotide pyrophosphorylase [carboxylating]	1.45695	2.9323	0.496864	-1.00908	1.16536e-18	1.55435e-17
Q96EM0	L3HYPDH	Trans-3-hydroxy-L-proline dehydratase	1.14807	1.96603	0.583955	-0.776071	1.19638e-18	1.58944e-17
O95758	PTBP3	Polypyrimidine tract-binding protein 3	1.56155	0.841568	1.85553	0.891828	1.22821e-18	1.62852e-17
Q96FV2	SCRN2	Secernin-2	1.20869	1.72588	0.700332	-0.513889	1.26087e-18	1.66204e-17
P06276	BCHE	Cholinesterase	1.32551	4.24932	0.311934	-1.68069	1.26087e-18	1.66204e-17
P51659	HSD17B4	Peroxisomal multifunctional enzyme type 2	1.30295	0.877207	1.48534	0.57079	1.2944e-18	1.68973e-17
Q9UDT6	CLIP2	CAP-Gly domain-containing linker protein 2	1.31842	2.26035	0.58328	-0.77774	1.2944e-18	1.68973e-17
O14786	NRP1	Neuropilin-1	2.06826	3.40071	0.608185	-0.717419	1.3288e-18	1.73129e-17
P37840	SNCA	Alpha-synuclein	0.172434	0.298704	0.577273	-0.792673	1.36411e-18	1.77387e-17
Q9NZN3	EHD3	EH domain-containing protein 3	1.77118	3.25052	0.544892	-0.875959	1.40034e-18	1.81399e-17
P49908	SELENOP	Selenoprotein P	1.40197	3.19107	0.439341	-1.18659	1.40034e-18	1.81399e-17
O15427	SLC16A3	Monocarboxylate transporter 4	0.566543	0.291567	1.9431	0.95836	1.51484e-18	1.9363e-17
Q04864	REL	Proto-oncogene c-Rel	1.73829	1.04363	1.66562	0.736063	1.51484e-18	1.9363e-17
Q12965	MYO1E	Unconventional myosin-Ie	1.08665	0.744571	1.45943	0.545409	1.51484e-18	1.9363e-17
Q02108	GUCY1A1	Guanylate cyclase soluble subunit alpha-1	1.86345	3.68805	0.505268	-0.984878	1.51484e-18	1.9363e-17
Q9BXX0	EMILIN2	EMILIN-2	2.33287	5.6178	0.415264	-1.2679	1.51484e-18	1.9363e-17
O95568	METTL18	Histidine protein methyltransferase 1 homolog	2.16112	7.15269	0.302141	-1.72671	1.51484e-18	1.9363e-17
P18031	PTPN1	Tyrosine-protein phosphatase non-receptor type 1	1.32109	0.920017	1.43594	0.521996	1.59626e-18	2.03267e-17
P60468	SEC61B	Protein transport protein Sec61 subunit beta	1.20275	0.68277	1.76157	0.816861	1.63857e-18	2.08262e-17
P03951	F11	Coagulation factor XI	1.54518	3.4708	0.445193	-1.1675	1.682e-18	2.12183e-17
Q13885	TUBB2A	Tubulin beta-2A chain	0.887435	2.06117	0.43055	-1.21575	1.682e-18	2.12183e-17
P26358	DNMT1	DNA (cytosine-5)-methyltransferase 1	0.785259	0.539993	1.4542	0.540228	1.72655e-18	2.16188e-17
Q14642	INPP5A	Inositol polyphosphate-5-phosphatase A	1.10895	1.98569	0.558471	-0.840446	1.72655e-18	2.16188e-17
O75106	AOC2	Retina-specific copper amine oxidase	1.17945	5.38009	0.219225	-2.18951	1.72655e-18	2.16188e-17
Q9NY12	GAR1	H/ACA ribonucleoprotein complex subunit 1	0.639344	0.409918	1.55969	0.641256	1.77228e-18	2.20685e-17
P43246	MSH2	DNA mismatch repair protein Msh2	1.08126	0.721624	1.49837	0.583393	1.77228e-18	2.20685e-17
P02679	FGG	Fibrinogen gamma chain	1.94634	5.52262	0.352432	-1.50458	1.77228e-18	2.20685e-17
Q14566	MCM6	DNA replication licensing factor MCM6	0.941806	0.469518	2.0059	1.00425	1.8192e-18	2.24047e-17
Q56VL3	OCIAD2	OCIA domain-containing protein 2	1.74273	0.909573	1.91598	0.938083	1.8192e-18	2.24047e-17
Q14126	DSG2	Desmoglein-2	1.49108	0.78597	1.89713	0.923815	1.8192e-18	2.24047e-17
P49961	ENTPD1	Ectonucleoside triphosphate diphosphohydrolase 1	2.58007	5.21709	0.494543	-1.01583	1.8192e-18	2.24047e-17
Q9NVD7	PARVA	Alpha-parvin	0.867572	1.76594	0.491279	-1.02538	1.8192e-18	2.24047e-17
P01871	IGHM	Immunoglobulin heavy constant mu	2.94024	6.88798	0.426865	-1.22815	1.8192e-18	2.24047e-17
P0DME0	SETSIP	Protein SETSIP	0.677428	0.470095	1.44104	0.527114	1.86734e-18	2.28724e-17
Q01105	SET	Protein SET	0.677428	0.470095	1.44104	0.527114	1.86734e-18	2.28724e-17
O14776	TCERG1	Transcription elongation regulator 1	0.539852	0.375807	1.43651	0.522571	1.91674e-18	2.33083e-17
Q03519	TAP2	Antigen peptide transporter 2	3.21456	1.76987	1.81627	0.860981	1.96744e-18	2.37961e-17
P58335	ANTXR2	Anthrax toxin receptor 2	2.10477	4.02663	0.522712	-0.935911	2.07283e-18	2.49813e-17
Q6NZI2	CAVIN1	Caveolae-associated protein 1	0.879395	2.24397	0.391893	-1.35147	2.07283e-18	2.49813e-17
P15311	EZR	Ezrin	1.08452	0.668779	1.62164	0.697454	2.12759e-18	2.54594e-17
Q5VTL8	PRPF38B	Pre-mRNA-splicing factor 38B	0.976839	0.688768	1.41824	0.504104	2.12759e-18	2.54594e-17
Q9UBG0	MRC2	C-type mannose receptor 2	1.81807	2.98753	0.608553	-0.716545	2.12759e-18	2.54594e-17
P84103	SRSF3	Serine/arginine-rich splicing factor 3	0.607203	0.402388	1.509	0.593592	2.18379e-18	2.60856e-17
O75717	WDHD1	WD repeat and HMG-box DNA-binding protein 1	0.503569	0.311481	1.61669	0.693042	2.24145e-18	2.6633e-17
Q9H4M9	EHD1	EH domain-containing protein 1	1.28506	1.82849	0.702797	-0.50882	2.24145e-18	2.6633e-17
O14929	HAT1	Histone acetyltransferase type B catalytic subunit	0.565965	0.333736	1.69584	0.762004	2.36131e-18	2.77639e-17
Q9UII2	ATP5IF1	ATPase inhibitor, mitochondrial	0.485955	0.286725	1.69484	0.761152	2.36131e-18	2.77639e-17
Q15833	STXBP2	Syntaxin-binding protein 2	2.29737	1.38123	1.66328	0.734033	2.36131e-18	2.77639e-17
Q6UVY6	MOXD1	DBH-like monooxygenase protein 1	1.75319	3.43609	0.510227	-0.970788	2.36131e-18	2.77639e-17
A0A0C4DH38	IGHV5-51	Immunoglobulin heavy variable 5-51	3.29742	9.22948	0.35727	-1.48491	2.36131e-18	2.77639e-17
Q16666	IFI16	Gamma-interferon-inducible protein 16	3.53012	2.05039	1.72168	0.783819	2.4236e-18	2.82991e-17
Q15942	ZYX	Zyxin	0.628657	1.01473	0.619529	-0.690756	2.4236e-18	2.82991e-17
Q05193	DNM1	Dynamin-1	1.41215	2.67559	0.527789	-0.921966	2.4236e-18	2.82991e-17
O75781	PALM	Paralemmin-1	0.593769	1.44677	0.410412	-1.28486	2.48751e-18	2.89951e-17
Q96EP5	DAZAP1	DAZ-associated protein 1	0.750513	0.470142	1.59635	0.67478	2.55307e-18	2.9606e-17
P01715	IGLV3-1	Immunoglobulin lambda variable 3-1	1.70554	3.63927	0.468648	-1.09342	2.55307e-18	2.9606e-17
P26927	MST1	Hepatocyte growth factor-like protein	1.62913	3.98649	0.408663	-1.29102	2.62035e-18	3.02303e-17
A0A0B4J1Y9	IGHV3-72	Immunoglobulin heavy variable 3-72	3.41397	11.3828	0.299925	-1.73733	2.62035e-18	3.02303e-17
P61326	MAGOH	Protein mago nashi homolog	0.952308	0.597565	1.59365	0.672332	2.68938e-18	3.08684e-17
Q13449	LSAMP	Limbic system-associated membrane protein	1.89748	6.99285	0.271345	-1.8818	2.68938e-18	3.08684e-17
Q96C19	EFHD2	EF-hand domain-containing protein D2	2.04811	1.25587	1.63083	0.705605	2.7602e-18	3.15738e-17
Q68D91	MBLAC2	Metallo-beta-lactamase domain-containing protein 2	0.974745	1.49535	0.651852	-0.617384	2.83286e-18	3.22955e-17
Q06278	AOX1	Aldehyde oxidase	1.31892	2.73141	0.482872	-1.05029	2.83286e-18	3.22955e-17
O95816	BAG2	BAG family molecular chaperone regulator 2	0.438943	0.862209	0.509091	-0.974004	2.90741e-18	3.29783e-17
Q14766	LTBP1	Latent-transforming growth factor beta-binding protein 1	1.85124	3.65586	0.506377	-0.981717	2.90741e-18	3.29783e-17
P02511	CRYAB	Alpha-crystallin B chain	1.26755	2.94356	0.430617	-1.21552	3.06236e-18	3.4504e-17
P02452	COL1A1	Collagen alpha-1(I) chain	2.22216	6.03877	0.367981	-1.4423	3.06236e-18	3.4504e-17
P29728	OAS2	2'-5'-oligoadenylate synthase 2	3.90443	1.9894	1.96262	0.972782	3.14287e-18	3.5352e-17
P13987	CD59	CD59 glycoprotein	0.715179	1.21544	0.58841	-0.765106	3.22547e-18	3.61606e-17
P32455	GBP1	Guanylate-binding protein 1	2.72372	1.29711	2.09984	1.07028	3.3102e-18	3.67444e-17
P38571	LIPA	Lysosomal acid lipase/cholesteryl ester hydrolase	1.3264	0.847005	1.56599	0.647077	3.3102e-18	3.67444e-17
P41223	BUD31	Protein BUD31 homolog	0.812117	0.522029	1.55569	0.637557	3.3102e-18	3.67444e-17
Q9NWV4	CZIB	CXXC motif containing zinc binding protein	1.24854	1.85643	0.672546	-0.572295	3.3102e-18	3.67444e-17
Q7Z4H8	POGLUT3	Protein O-glucosyltransferase 3	1.10175	1.72221	0.639731	-0.644462	3.3102e-18	3.67444e-17
P16083	NQO2	Ribosyldihydronicotinamide dehydrogenase [quinone]	0.547377	0.933605	0.586305	-0.770277	3.39714e-18	3.76475e-17
P52292	KPNA2	Importin subunit alpha-1	0.246769	0.155088	1.59115	0.670069	3.48633e-18	3.83212e-17
O95881	TXNDC12	Thioredoxin domain-containing protein 12	0.70401	0.46391	1.51756	0.601752	3.48633e-18	3.83212e-17
P62316	SNRPD2	Small nuclear ribonucleoprotein Sm D2	0.600629	0.401272	1.49681	0.581892	3.48633e-18	3.83212e-17
Q9UBX5	FBLN5	Fibulin-5	1.89638	3.97844	0.476665	-1.06895	3.48633e-18	3.83212e-17
P07858	CTSB	Cathepsin B	3.44234	1.98393	1.73511	0.79503	3.6717e-18	4.01626e-17
P35908	KRT2	Keratin, type II cytoskeletal 2 epidermal	1.63072	2.93275	0.556037	-0.846748	3.6717e-18	4.01626e-17
Q9NQ89	C12orf4	Protein C12orf4	1.39186	3.01456	0.461712	-1.11493	3.6717e-18	4.01626e-17
O94919	ENDOD1	Endonuclease domain-containing 1 protein	1.75875	2.90848	0.604698	-0.725714	3.768e-18	4.0819e-17
Q9UN36	NDRG2	Protein NDRG2	1.87478	3.2452	0.577709	-0.791586	3.768e-18	4.0819e-17
P51178	PLCD1	1-phosphatidylinositol 4,5-bisphosphate phosphodiesterase delta-1	1.95834	3.85198	0.508398	-0.97597	3.768e-18	4.0819e-17
P02649	APOE	Apolipoprotein E	1.56808	3.62982	0.431999	-1.2109	3.768e-18	4.0819e-17
Q06323	PSME1	Proteasome activator complex subunit 1	1.23546	0.782896	1.57806	0.658156	3.8668e-18	4.1622e-17
P48729	CSNK1A1	Casein kinase I isoform alpha	1.4312	0.958259	1.49354	0.578738	3.8668e-18	4.1622e-17
Q8N752	CSNK1A1L	Casein kinase I isoform alpha-like	1.4312	0.958259	1.49354	0.578738	3.8668e-18	4.1622e-17
P32969	RPL9	60S ribosomal protein L9	0.515368	0.30958	1.66473	0.735291	3.96815e-18	4.25772e-17
Q92922	SMARCC1	SWI/SNF complex subunit SMARCC1	0.506185	0.350158	1.44559	0.531659	3.96815e-18	4.25772e-17
Q03518	TAP1	Antigen peptide transporter 1	2.7751	1.60883	1.72491	0.786524	4.07212e-18	4.34853e-17
P33151	CDH5	Cadherin-5	1.74581	3.5511	0.491625	-1.02437	4.07212e-18	4.34853e-17
P09936	UCHL1	Ubiquitin carboxyl-terminal hydrolase isozyme L1	0.166008	0.39195	0.423544	-1.23942	4.07212e-18	4.34853e-17
P21810	BGN	Biglycan	1.9726	5.38162	0.366544	-1.44794	4.2882e-18	4.55765e-17
P07327	ADH1A	Alcohol dehydrogenase 1A	1.28843	7.41988	0.173646	-2.52578	4.2882e-18	4.55765e-17
Q2TV78	MST1L	Putative macrophage stimulating 1-like protein	1.62913	3.98649	0.408663	-1.29102	4.40044e-18	4.65495e-17
Q96IY4	CPB2	Carboxypeptidase B2	1.4635	3.69529	0.396044	-1.33627	4.40044e-18	4.65495e-17
Q8WWZ4	ABCA10	ATP-binding cassette sub-family A member 10	1.15626	3.43134	0.336971	-1.5693	4.40044e-18	4.65495e-17
P49321	NASP	Nuclear autoantigenic sperm protein	0.508898	0.316542	1.60768	0.684979	4.51559e-18	4.7544e-17
Q16563	SYPL1	Synaptophysin-like protein 1	1.4733	2.19601	0.670897	-0.575837	4.51559e-18	4.7544e-17
P21333	FLNA	Filamin-A	0.98311	2.2905	0.429212	-1.22024	4.51559e-18	4.7544e-17
P28340	POLD1	DNA polymerase delta catalytic subunit	0.849176	0.561665	1.51189	0.596354	4.63371e-18	4.86359e-17
O14495	PLPP3	Phospholipid phosphatase 3	1.38884	3.59013	0.38685	-1.37015	4.63371e-18	4.86359e-17
Q9Y490	TLN1	Talin-1	1.01907	1.64457	0.619658	-0.690456	5.13745e-18	5.35072e-17
Q14195	DPYSL3	Dihydropyrimidinase-related protein 3	1.33847	2.74883	0.486923	-1.03824	5.13745e-18	5.35072e-17
A0A075B6K4	IGLV3-10	Immunoglobulin lambda variable 3-10	1.70554	3.63927	0.468648	-1.09342	5.13745e-18	5.35072e-17
P14543	NID1	Nidogen-1	2.0563	4.08779	0.503035	-0.991268	5.27161e-18	5.46515e-17
O94911	ABCA8	ATP-binding cassette sub-family A member 8	1.15626	3.43134	0.336971	-1.5693	5.27161e-18	5.46515e-17
Q15599	SLC9A3R2	Na(+)/H(+) exchange regulatory cofactor NHE-RF2	0.777303	1.29867	0.598536	-0.74049	5.40923e-18	5.59922e-17
Q9H330	TMEM245	Transmembrane protein 245	0.767367	1.09421	0.7013	-0.511897	5.69519e-18	5.86822e-17
P28161	GSTM2	Glutathione S-transferase Mu 2	1.18224	2.87999	0.4105	-1.28455	5.69519e-18	5.86822e-17
P02743	APCS	Serum amyloid P-component	1.35416	5.86533	0.230875	-2.11482	5.69519e-18	5.86822e-17
Q9UJS0	SLC25A13	Calcium-binding mitochondrial carrier protein Aralar2	0.962165	0.67282	1.43005	0.516064	5.84371e-18	6.01207e-17
O94901	SUN1	SUN domain-containing protein 1	1.07099	1.51688	0.706046	-0.502167	6.15232e-18	6.31034e-17
Q13601	KRR1	KRR1 small subunit processome component homolog	0.645457	0.407917	1.58233	0.662047	6.31261e-18	6.45512e-17
O14735	CDIPT	CDP-diacylglycerol--inositol 3-phosphatidyltransferase	1.36318	1.94534	0.70074	-0.513049	6.47701e-18	6.60322e-17
P29992	GNA11	Guanine nucleotide-binding protein subunit alpha-11	1.36474	2.10325	0.648874	-0.623991	6.47701e-18	6.60322e-17
P09234	SNRPC	U1 small nuclear ribonucleoprotein C	0.811261	0.45784	1.77193	0.825324	6.64564e-18	6.74457e-17
A0A0J9YXX1	IGHV5-10-1	Immunoglobulin heavy variable 5-10-1	2.66104	7.7204	0.344677	-1.53669	6.64564e-18	6.74457e-17
Q13242	SRSF9	Serine/arginine-rich splicing factor 9	0.557916	0.36839	1.51447	0.598816	6.996e-18	7.06827e-17
P02545	LMNA	Prelamin-A/C	1.20268	1.78503	0.673762	-0.569689	6.996e-18	7.06827e-17
Q8IUA7	ABCA9	ATP-binding cassette sub-family A member 9	1.15626	3.43134	0.336971	-1.5693	6.996e-18	7.06827e-17
P35244	RPA3	Replication protein A 14 kDa subunit	0.878638	0.567805	1.54743	0.629873	7.17796e-18	7.21968e-17
Q15418	RPS6KA1	Ribosomal protein S6 kinase alpha-1	1.00895	0.659598	1.52965	0.613202	7.17796e-18	7.21968e-17
Q14376	GALE	UDP-glucose 4-epimerase	1.14616	0.729981	1.57012	0.650875	7.36458e-18	7.34174e-17
Q92598	HSPH1	Heat shock protein 105 kDa	1.06151	0.715658	1.48327	0.568782	7.36458e-18	7.34174e-17
P20700	LMNB1	Lamin-B1	0.900536	0.611631	1.47235	0.558122	7.36458e-18	7.34174e-17
Q8TDQ7	GNPDA2	Glucosamine-6-phosphate isomerase 2	1.33641	1.99521	0.669809	-0.578179	7.36458e-18	7.34174e-17
P48509	CD151	CD151 antigen	0.968941	1.68729	0.574259	-0.800226	7.36458e-18	7.34174e-17
P43251	BTD	Biotinidase	1.61075	3.30965	0.486685	-1.03894	7.556e-18	7.51037e-17
Q9BYX4	IFIH1	Interferon-induced helicase C domain-containing protein 1	2.52768	1.62714	1.55344	0.635469	7.75232e-18	7.66038e-17
P52597	HNRNPF	Heterogeneous nuclear ribonucleoprotein F	0.946232	0.667342	1.41791	0.503768	7.75232e-18	7.66038e-17
P11047	LAMC1	Laminin subunit gamma-1	2.06389	4.4043	0.468607	-1.09355	7.75232e-18	7.66038e-17
P02786	TFRC	Transferrin receptor protein 1	0.868439	0.588365	1.47602	0.561714	8.16019e-18	7.98161e-17
Q9UP52	TFR2	Transferrin receptor protein 2	0.868439	0.588365	1.47602	0.561714	8.16019e-18	7.98161e-17
P11766	ADH5	Alcohol dehydrogenase class-3	1.12011	1.74533	0.641776	-0.639859	8.16019e-18	7.98161e-17
Q12929	EPS8	Epidermal growth factor receptor kinase substrate 8	1.02727	1.58059	0.64993	-0.621643	8.372e-18	8.16512e-17
P29590	PML	Protein PML	2.83953	1.83094	1.55086	0.633066	8.58923e-18	8.34082e-17
O43847	NRDC	Nardilysin	0.692143	0.482773	1.43368	0.519725	8.81202e-18	8.53262e-17
O75533	SF3B1	Splicing factor 3B subunit 1	0.655733	0.46303	1.41618	0.502003	9.04051e-18	8.74132e-17
P53999	SUB1	Activated RNA polymerase II transcriptional coactivator p15	0.589385	0.369934	1.59322	0.671944	9.27485e-18	8.94228e-17
Q9Y624	F11R	Junctional adhesion molecule A	3.48256	1.97429	1.76395	0.818811	9.76166e-18	9.38482e-17
P30040	ERP29	Endoplasmic reticulum resident protein 29	1.42772	0.975298	1.46388	0.549801	9.76166e-18	9.38482e-17
O43823	AKAP8	A-kinase anchor protein 8	0.825286	0.549252	1.50257	0.587428	1.00144e-17	9.55975e-17
Q8NAV1	PRPF38A	Pre-mRNA-splicing factor 38A	0.745697	0.515674	1.44606	0.532129	1.05395e-17	1.00185e-16
P56199	ITGA1	Integrin alpha-1	1.64424	3.44151	0.477767	-1.06562	1.05395e-17	1.00185e-16
O14933	UBE2L6	Ubiquitin/ISG15-conjugating enzyme E2 L6	3.87445	2.28333	1.69684	0.762851	1.08122e-17	1.02058e-16
Q14194	CRMP1	Dihydropyrimidinase-related protein 1	0.276913	0.498764	0.555197	-0.848927	1.08122e-17	1.02058e-16
P04003	C4BPA	C4b-binding protein alpha chain	1.91197	4.61952	0.413888	-1.27269	1.08122e-17	1.02058e-16
P45381	ASPA	Aspartoacylase	1.64397	8.21243	0.200181	-2.32062	1.08122e-17	1.02058e-16
P78559	MAP1A	Microtubule-associated protein 1A	1.13345	2.09597	0.540774	-0.886902	1.13785e-17	1.07253e-16
P22307	SCP2	Non-specific lipid-transfer protein	1.54001	1.03639	1.48594	0.571375	1.16725e-17	1.09872e-16
Q9NTJ3	SMC4	Structural maintenance of chromosomes protein 4	0.452027	0.309394	1.461	0.54696	1.19741e-17	1.11929e-16
P21266	GSTM3	Glutathione S-transferase Mu 3	0.478592	1.17418	0.407599	-1.29478	1.19741e-17	1.11929e-16
P62736	ACTA2	Actin, aortic smooth muscle	1.06886	3.20483	0.333514	-1.58418	1.19741e-17	1.11929e-16
Q6NYC1	JMJD6	Bifunctional arginine demethylase and lysyl-hydroxylase JMJD6	0.482897	0.316852	1.52405	0.607908	1.22833e-17	1.14503e-16
Q6UVK1	CSPG4	Chondroitin sulfate proteoglycan 4	1.43894	2.87177	0.501063	-0.996935	1.22833e-17	1.14503e-16
Q03167	TGFBR3	Transforming growth factor beta receptor type 3	1.23304	3.92438	0.314199	-1.67025	1.26004e-17	1.16813e-16
Q9UBY9	HSPB7	Heat shock protein beta-7	1.10894	4.04885	0.273889	-1.86833	1.26004e-17	1.16813e-16
P63027	VAMP2	Vesicle-associated membrane protein 2	0.605606	0.921365	0.657292	-0.605393	1.29256e-17	1.19336e-16
Q9Y6B6	SAR1B	GTP-binding protein SAR1b	1.29945	0.779458	1.66711	0.737353	1.3259e-17	1.22248e-16
Q15392	DHCR24	Delta(24)-sterol reductase	1.50344	0.666224	2.25667	1.17419	1.3601e-17	1.24888e-16
O76024	WFS1	Wolframin	0.987726	1.68377	0.586615	-0.769515	1.3601e-17	1.24888e-16
P63267	ACTG2	Actin, gamma-enteric smooth muscle	1.06886	3.20483	0.333514	-1.58418	1.3601e-17	1.24888e-16
Q96CN7	ISOC1	Isochorismatase domain-containing protein 1	1.10387	1.57045	0.702901	-0.508607	1.39516e-17	1.27934e-16
Q9NQG5	RPRD1B	Regulation of nuclear pre-mRNA domain-containing protein 1B	0.946228	0.66098	1.43155	0.517582	1.46799e-17	1.34247e-16
P46952	HAAO	3-hydroxyanthranilate 3,4-dioxygenase	2.00709	3.65528	0.549095	-0.864872	1.46799e-17	1.34247e-16
P04264	KRT1	Keratin, type II cytoskeletal 1	1.25753	2.32811	0.540148	-0.888572	1.5058e-17	1.37518e-16
Q15067	ACOX1	Peroxisomal acyl-coenzyme A oxidase 1	0.801735	0.520648	1.53988	0.622817	1.54456e-17	1.40678e-16
Q96ER9	CCDC51	Coiled-coil domain-containing protein 51	1.03463	5.18341	0.199604	-2.32479	1.54456e-17	1.40678e-16
Q6P474	PDXDC2P	Putative pyridoxal-dependent decarboxylase domain-containing protein 2	0.897414	0.629962	1.42455	0.51051	1.58431e-17	1.43524e-16
Q6P996	PDXDC1	Pyridoxal-dependent decarboxylase domain-containing protein 1	0.897414	0.629962	1.42455	0.51051	1.58431e-17	1.43524e-16
Q9H6R3	ACSS3	Acyl-CoA synthetase short-chain family member 3, mitochondrial	1.61247	3.53394	0.456281	-1.13201	1.58431e-17	1.43524e-16
Q9BQP7	MGME1	Mitochondrial genome maintenance exonuclease 1	0.576104	0.375748	1.53322	0.616562	1.66687e-17	1.50801e-16
Q99729	HNRNPAB	Heterogeneous nuclear ribonucleoprotein A/B	0.780284	0.505482	1.54364	0.626339	1.70973e-17	1.54471e-16
P14866	HNRNPL	Heterogeneous nuclear ribonucleoprotein L	0.655426	0.44991	1.45679	0.542794	1.75367e-17	1.57387e-16
P42785	PRCP	Lysosomal Pro-X carboxypeptidase	0.93003	1.36318	0.682251	-0.551625	1.75367e-17	1.57387e-16
Q8IWS0	PHF6	PHD finger protein 6	0.344433	0.213612	1.61242	0.68923	1.79873e-17	1.61003e-16
P16930	FAH	Fumarylacetoacetase	1.303	1.96963	0.661542	-0.596096	1.84493e-17	1.64484e-16
P04216	THY1	Thy-1 membrane glycoprotein	2.05086	3.72548	0.550495	-0.861198	1.94087e-17	1.71902e-16
P02549	SPTA1	Spectrin alpha chain, erythrocytic 1	1.50455	3.76299	0.399827	-1.32255	1.94087e-17	1.71902e-16
P20851	C4BPB	C4b-binding protein beta chain	1.87775	4.73478	0.396588	-1.33429	1.94087e-17	1.71902e-16
Q9Y2Q3	GSTK1	Glutathione S-transferase kappa 1	2.04598	1.38849	1.47352	0.559271	1.99066e-17	1.75392e-16
P40937	RFC5	Replication factor C subunit 5	0.754243	0.508975	1.48189	0.567435	2.14775e-17	1.87518e-16
P01709	IGLV2-8	Immunoglobulin lambda variable 2-8	1.66165	3.95228	0.420429	-1.25007	2.14775e-17	1.87518e-16
P02730	SLC4A1	Band 3 anion transport protein	1.5271	3.93767	0.387818	-1.36655	2.14775e-17	1.87518e-16
P10619	CTSA	Lysosomal protective protein	1.47973	0.991856	1.49188	0.577132	2.20278e-17	1.92074e-16
Q8N474	SFRP1	Secreted frizzled-related protein 1	1.68334	3.34876	0.502677	-0.992296	2.31705e-17	2.01258e-16
Q96SM3	CPXM1	Probable carboxypeptidase X1	1.92677	5.11159	0.376941	-1.40759	2.37636e-17	2.06145e-16
Q9H939	PSTPIP2	Proline-serine-threonine phosphatase-interacting protein 2	1.36794	0.841969	1.62469	0.700165	2.56342e-17	2.21517e-16
Q13287	NMI	N-myc-interactor	2.66775	1.63605	1.63061	0.70541	2.76499e-17	2.38022e-16
Q86SE5	RALYL	RNA-binding Raly-like protein	0.439764	0.30617	1.43634	0.522398	2.76499e-17	2.38022e-16
O14896	IRF6	Interferon regulatory factor 6	3.34288	1.79033	1.86719	0.900871	2.83559e-17	2.42861e-16
P35527	KRT9	Keratin, type I cytoskeletal 9	1.69653	3.27749	0.517632	-0.950002	2.83559e-17	2.42861e-16
P18858	LIG1	DNA ligase 1	0.644948	0.415948	1.55055	0.632779	2.98218e-17	2.52849e-16
P10412	HIST1H1E	Histone H1.4	0.0706173	0.10395	0.679336	-0.557803	2.98218e-17	2.52849e-16
P22492	HIST1H1T	Histone H1t	0.0706173	0.10395	0.679336	-0.557803	2.98218e-17	2.52849e-16
Q9UK55	SERPINA10	Protein Z-dependent protease inhibitor	2.28576	6.01726	0.379868	-1.39643	2.98218e-17	2.52849e-16
O60921	HUS1	Checkpoint protein HUS1	1.01774	0.694154	1.46616	0.55204	3.13624e-17	2.64581e-16
O94760	DDAH1	N(G),N(G)-dimethylarginine dimethylaminohydrolase 1	0.628839	1.22435	0.513611	-0.961252	3.29814e-17	2.77546e-16
Q9NVI1	FANCI	Fanconi anemia group I protein	0.383204	0.259235	1.47821	0.563851	3.46829e-17	2.90776e-16
Q9ULC3	RAB23	Ras-related protein Rab-23	1.41255	2.41052	0.585993	-0.771046	3.46829e-17	2.90776e-16
P32119	PRDX2	Peroxiredoxin-2	0.900083	1.35287	0.665312	-0.587896	3.55658e-17	2.96704e-16
P05106	ITGB3	Integrin beta-3	1.34922	2.77196	0.486739	-1.03878	3.55658e-17	2.96704e-16
P0DOX3	nan	Immunoglobulin delta heavy chain	1.31988	3.05218	0.43244	-1.20943	3.55658e-17	2.96704e-16
Q9BUT1	BDH2	3-hydroxybutyrate dehydrogenase type 2	1.23557	1.83186	0.674488	-0.568136	3.64708e-17	3.03879e-16
Q9BRX5	GINS3	DNA replication complex GINS protein PSF3	0.667956	0.267481	2.49721	1.32032	3.73986e-17	3.10078e-16
Q96AZ6	ISG20	Interferon-stimulated gene 20 kDa protein	2.66874	1.63827	1.629	0.703985	3.73986e-17	3.10078e-16
Q96A72	MAGOHB	Protein mago nashi homolog 2	0.906922	0.581291	1.56019	0.641718	3.83497e-17	3.17184e-16
Q6PCB0	VWA1	von Willebrand factor A domain-containing protein 1	2.52245	4.88279	0.516599	-0.952882	4.03239e-17	3.31885e-16
P00915	CA1	Carbonic anhydrase 1	1.80309	4.60587	0.391476	-1.35301	4.34747e-17	3.56513e-16
P49005	POLD2	DNA polymerase delta subunit 2	0.818691	0.566063	1.44629	0.532355	4.57088e-17	3.72571e-16
P51688	SGSH	N-sulphoglucosamine sulphohydrolase	1.25168	1.88329	0.664623	-0.589392	4.57088e-17	3.72571e-16
P31937	HIBADH	3-hydroxyisobutyrate dehydrogenase, mitochondrial	1.33874	2.06194	0.649262	-0.623128	4.57088e-17	3.72571e-16
P01593	IGKV1D-33	Immunoglobulin kappa variable 1D-33	2.0843	5.55613	0.375135	-1.41452	4.57088e-17	3.72571e-16
P18564	ITGB6	Integrin beta-6	4.66769	1.72618	2.70406	1.43513	4.6868e-17	3.8064e-16
Q9H492	MAP1LC3A	Microtubule-associated proteins 1A/1B light chain 3A	0.434663	0.705631	0.615992	-0.699016	4.6868e-17	3.8064e-16
Q01130	SRSF2	Serine/arginine-rich splicing factor 2	0.803225	0.551468	1.45652	0.542527	5.05223e-17	4.08354e-16
Q4LDE5	SVEP1	Sushi, von Willebrand factor type A, EGF and pentraxin domain-containing protein 1	1.512	4.25571	0.355287	-1.49294	5.18018e-17	4.18194e-16
Q9BTD8	RBM42	RNA-binding protein 42	0.412448	0.272798	1.51191	0.596377	5.44574e-17	4.38061e-16
Q9BRL6	SRSF8	Serine/arginine-rich splicing factor 8	0.784284	0.551468	1.42218	0.5081	5.44574e-17	4.38061e-16
P14207	FOLR2	Folate receptor beta	2.78017	5.42907	0.51209	-0.965531	5.58351e-17	4.48608e-16
P50148	GNAQ	Guanine nucleotide-binding protein G(q) subunit alpha	1.60818	2.35595	0.682602	-0.550883	6.16981e-17	4.94537e-16
P20042	EIF2S2	Eukaryotic translation initiation factor 2 subunit 2	0.358231	0.208722	1.71631	0.779312	6.32563e-17	5.05227e-16
Q96IU4	ABHD14B	Protein ABHD14B	0.977427	1.48933	0.656285	-0.607605	6.48532e-17	5.15541e-16
P49593	PPM1F	Protein phosphatase 1F	0.971576	1.56805	0.619609	-0.69057	6.48532e-17	5.15541e-16
Q9H900	ZWILCH	Protein zwilch homolog	0.51803	0.300978	1.72116	0.783378	6.649e-17	5.24843e-16
O43556	SGCE	Epsilon-sarcoglycan	1.393	4.3086	0.323307	-1.62902	6.649e-17	5.24843e-16
Q13797	ITGA9	Integrin alpha-9	1.40934	3.22601	0.436869	-1.19473	6.81674e-17	5.37456e-16
Q9NQ88	TIGAR	Fructose-2,6-bisphosphatase TIGAR	0.689657	0.45616	1.51187	0.596338	6.98866e-17	5.49726e-16
Q8IWI9	MGA	MAX gene-associated protein	1.30203	7.21652	0.180424	-2.47054	6.98866e-17	5.49726e-16
Q01658	DR1	Protein Dr1	0.547841	0.376967	1.45329	0.539318	7.34542e-17	5.76445e-16
P99999	CYCS	Cytochrome c	0.571506	0.345479	1.65424	0.726171	7.53048e-17	5.90281e-16
P80217	IFI35	Interferon-induced 35 kDa protein	2.52625	1.47479	1.71295	0.776486	7.72013e-17	6.03745e-16
Q9BUP3	HTATIP2	Oxidoreductase HTATIP2	1.36069	0.92912	1.46449	0.550399	7.72013e-17	6.03745e-16
P27797	CALR	Calreticulin	1.51478	1.01685	1.48967	0.574997	7.9145e-17	6.18228e-16
P55735	SEC13	Protein SEC13 homolog	0.994036	0.681069	1.45952	0.545497	9.65334e-17	7.48855e-16
P08133	ANXA6	Annexin A6	1.82092	2.89497	0.628994	-0.668881	9.89561e-17	7.66768e-16
Q10588	BST1	ADP-ribosyl cyclase/cyclic ADP-ribose hydrolase 2	2.46583	5.5651	0.443087	-1.17434	1.01439e-16	7.85103e-16
P20674	COX5A	Cytochrome c oxidase subunit 5A, mitochondrial	1.20396	0.832127	1.44685	0.532916	1.03983e-16	8.03872e-16
Q00526	CDK3	Cyclin-dependent kinase 3	0.527559	0.34055	1.54914	0.631466	1.0659e-16	8.21204e-16
P14406	COX7A2	Cytochrome c oxidase subunit 7A2, mitochondrial	1.44049	0.963599	1.4949	0.580053	1.0659e-16	8.21204e-16
O43278	SPINT1	Kunitz-type protease inhibitor 1	3.64996	2.38624	1.52958	0.61314	1.11999e-16	8.57977e-16
O75223	GGCT	Gamma-glutamylcyclotransferase	1.14834	0.736366	1.55947	0.641052	1.20623e-16	9.19869e-16
P09972	ALDOC	Fructose-bisphosphate aldolase C	1.58129	2.35423	0.671683	-0.574148	1.20623e-16	9.19869e-16
Q9UDR5	AASS	Alpha-aminoadipic semialdehyde synthase, mitochondrial	1.31206	2.28393	0.574475	-0.799683	1.20623e-16	9.19869e-16
A0A087WSY4	IGHV4-30-2	Immunoglobulin heavy variable 4-30-2	1.80215	4.36453	0.412907	-1.27611	1.23641e-16	9.41818e-16
Q8N1A0	KRT222	Keratin-like protein KRT222	2.70914	1.03898	2.60751	1.38267	1.26733e-16	9.63198e-16
Q9ULH0	KIDINS220	Kinase D-interacting substrate of 220 kDa	0.958705	0.568537	1.68627	0.753831	1.26733e-16	9.63198e-16
P05455	SSB	Lupus La protein	0.378776	0.261122	1.45057	0.536621	1.33148e-16	1.00742e-15
P50748	KNTC1	Kinetochore-associated protein 1	0.613228	0.425798	1.44019	0.526254	1.36474e-16	1.02683e-15
Q01196	RUNX1	Runt-related transcription factor 1	1.76551	0.992858	1.77821	0.830427	1.39883e-16	1.05013e-15
Q16880	UGT8	2-hydroxyacylsphingosine 1-beta-galactosyltransferase	1.60095	5.20252	0.307726	-1.70028	1.39883e-16	1.05013e-15
P49458	SRP9	Signal recognition particle 9 kDa protein	0.648483	0.450715	1.43879	0.524853	1.43375e-16	1.07158e-15
P62834	RAP1A	Ras-related protein Rap-1A	1.84331	2.77751	0.663656	-0.591493	1.43375e-16	1.07158e-15
Q9NYL2	MAP3K20	Mitogen-activated protein kinase kinase kinase 20	0.967701	1.48117	0.653338	-0.614099	1.43375e-16	1.07158e-15
Q01974	ROR2	Tyrosine-protein kinase transmembrane receptor ROR2	1.19569	2.31405	0.51671	-0.952572	1.43375e-16	1.07158e-15
Q9BRR6	ADPGK	ADP-dependent glucokinase	1.45231	0.967695	1.50079	0.585727	1.5062e-16	1.122e-15
Q8IV53	DENND1C	DENN domain-containing protein 1C	2.53901	1.47912	1.71657	0.779529	1.58225e-16	1.17606e-15
Q04637	EIF4G1	Eukaryotic translation initiation factor 4 gamma 1	0.389746	0.269243	1.44757	0.533628	1.58225e-16	1.17606e-15
Q9Y6F6	MRVI1	Protein MRVI1	1.33101	2.76942	0.48061	-1.05706	1.66208e-16	1.22863e-15
A0A0A0MS15	IGHV3-49	Immunoglobulin heavy variable 3-49	3.86623	9.70678	0.398302	-1.32807	1.66208e-16	1.22863e-15
P31350	RRM2	Ribonucleoside-diphosphate reductase subunit M2	0.573026	0.343385	1.66876	0.738774	1.70348e-16	1.25101e-15
P40306	PSMB10	Proteasome subunit beta type-10	3.28154	2.15698	1.52136	0.605361	1.70348e-16	1.25101e-15
A0A0B4J1U7	IGHV6-1	Immunoglobulin heavy variable 6-1	2.66504	10.0225	0.265905	-1.91102	1.92618e-16	1.40235e-15
P25189	MPZ	Myelin protein P0	0.957192	3.79855	0.251989	-1.98857	1.92618e-16	1.40235e-15
Q9BVK8	TMEM147	Transmembrane protein 147	1.08877	0.699353	1.55683	0.638613	1.97405e-16	1.43103e-15
P52298	NCBP2	Nuclear cap-binding protein subunit 2	0.591733	0.320078	1.84871	0.88652	2.02309e-16	1.46344e-15
P24752	ACAT1	Acetyl-CoA acetyltransferase, mitochondrial	0.662965	1.04584	0.633907	-0.657658	2.02309e-16	1.46344e-15
Q9UKX7	NUP50	Nuclear pore complex protein Nup50	0.55951	0.367709	1.52161	0.605601	2.23156e-16	1.60392e-15
Q15758	SLC1A5	Neutral amino acid transporter B(0)	1.14835	0.612019	1.87633	0.907917	2.40168e-16	1.71523e-15
Q9Y6C2	EMILIN1	EMILIN-1	2.14798	4.86556	0.441465	-1.17963	2.46118e-16	1.75401e-15
Q9UDY2	TJP2	Tight junction protein ZO-2	1.36503	0.922787	1.47925	0.564868	2.58457e-16	1.83613e-15
Q96RQ9	IL4I1	L-amino-acid oxidase	2.76046	1.83335	1.5057	0.590431	2.64853e-16	1.87172e-15
P29972	AQP1	Aquaporin-1	1.5447	4.20456	0.367388	-1.44462	2.64853e-16	1.87172e-15
P09661	SNRPA1	U2 small nuclear ribonucleoprotein A'	0.384427	0.260838	1.47381	0.559555	2.71405e-16	1.91201e-15
Q9NY15	STAB1	Stabilin-1	2.19519	3.31797	0.661605	-0.595957	2.71405e-16	1.91201e-15
O15162	PLSCR1	Phospholipid scramblase 1	5.03071	2.97957	1.6884	0.755658	2.78116e-16	1.95522e-15
P28838	LAP3	Cytosol aminopeptidase	2.65386	1.63845	1.61973	0.695756	2.78116e-16	1.95522e-15
Q969Z3	2021-03-02	Mitochondrial amidoxime reducing component 2	1.95735	2.94319	0.665046	-0.588474	2.84992e-16	1.99731e-15
Q07075	ENPEP	Glutamyl aminopeptidase	1.80985	3.65893	0.494638	-1.01556	2.84992e-16	1.99731e-15
P02753	RBP4	Retinol-binding protein 4	1.82577	5.00541	0.364759	-1.45499	2.84992e-16	1.99731e-15
P30086	PEBP1	Phosphatidylethanolamine-binding protein 1	1.07079	1.62973	0.657033	-0.605962	2.92034e-16	2.04243e-15
P11277	SPTB	Spectrin beta chain, erythrocytic	1.33574	2.54186	0.525498	-0.928243	2.92034e-16	2.04243e-15
P07093	SERPINE2	Glia-derived nexin	0.906841	1.78999	0.506619	-0.981028	3.14208e-16	2.18618e-15
P16035	TIMP2	Metalloproteinase inhibitor 2	1.56179	2.76354	0.565141	-0.823316	3.29904e-16	2.29066e-15
P31323	PRKAR2B	cAMP-dependent protein kinase type II-beta regulatory subunit	1.26677	2.47634	0.511549	-0.967055	3.3804e-16	2.34233e-15
P36551	CPOX	Oxygen-dependent coproporphyrinogen-III oxidase, mitochondrial	1.19984	0.838886	1.43027	0.51629	3.46373e-16	2.3927e-15
O43809	NUDT21	Cleavage and polyadenylation specificity factor subunit 5	0.800013	0.533286	1.50016	0.585112	3.54908e-16	2.44416e-15
Q9P1F3	ABRACL	Costars family protein ABRACL	2.01895	0.933377	2.16306	1.11307	3.63651e-16	2.49926e-15
Q9BZL4	PPP1R12C	Protein phosphatase 1 regulatory subunit 12C	0.922921	1.38502	0.666362	-0.585623	3.63651e-16	2.49926e-15
Q9HB40	SCPEP1	Retinoid-inducible serine carboxypeptidase	1.94446	1.22933	1.58172	0.661493	3.91172e-16	2.67479e-15
Q92882	OSTF1	Osteoclast-stimulating factor 1	2.61304	1.8204	1.43542	0.521475	3.91172e-16	2.67479e-15
Q6UWP8	SBSN	Suprabasin	1.213	3.6629	0.331159	-1.5944	3.91172e-16	2.67479e-15
Q5VV41	ARHGEF16	Rho guanine nucleotide exchange factor 16	2.04747	1.33878	1.52935	0.612923	4.00794e-16	2.73504e-15
P14927	UQCRB	Cytochrome b-c1 complex subunit 7	0.717432	0.43722	1.6409	0.714483	4.20744e-16	2.85674e-15
Q9BTX1	NDC1	Nucleoporin NDC1	0.675109	0.460194	1.46701	0.552878	4.20744e-16	2.85674e-15
O43291	SPINT2	Kunitz-type protease inhibitor 2	3.70237	2.05439	1.80218	0.849743	4.52516e-16	3.06322e-15
P67936	TPM4	Tropomyosin alpha-4 chain	1.45217	2.28495	0.635537	-0.653951	4.63624e-16	3.129e-15
Q2TAC2	CCDC57	Coiled-coil domain-containing protein 57	1.45217	2.28495	0.635537	-0.653951	4.63624e-16	3.129e-15
O14498	ISLR	Immunoglobulin superfamily containing leucine-rich repeat protein	1.72276	2.9257	0.588837	-0.764061	4.63624e-16	3.129e-15
O94788	ALDH1A2	Retinal dehydrogenase 2	1.50834	3.71602	0.405903	-1.30079	4.75e-16	3.20257e-15
P98095	FBLN2	Fibulin-2	2.92127	5.58787	0.522788	-0.935701	4.98583e-16	3.35487e-15
P48735	IDH2	Isocitrate dehydrogenase [NADP], mitochondrial	3.17101	2.0858	1.52029	0.604346	5.10804e-16	3.43026e-15
P23141	CES1	Liver carboxylesterase 1	1.75987	4.1808	0.42094	-1.24831	5.2332e-16	3.50385e-15
Q9UKY3	CES1P1	Putative inactive carboxylesterase 4	1.75987	4.1808	0.42094	-1.24831	5.2332e-16	3.50385e-15
Q86UU1	PHLDB1	Pleckstrin homology-like domain family B member 1	1.00975	1.66687	0.605773	-0.723151	5.49265e-16	3.65581e-15
Q13554	CAMK2B	Calcium/calmodulin-dependent protein kinase type II subunit beta	1.44356	2.58491	0.558457	-0.840483	5.49265e-16	3.65581e-15
Q13555	CAMK2G	Calcium/calmodulin-dependent protein kinase type II subunit gamma	1.44356	2.58491	0.558457	-0.840483	5.49265e-16	3.65581e-15
Q16610	ECM1	Extracellular matrix protein 1	1.76345	3.17295	0.555775	-0.847426	5.49265e-16	3.65581e-15
O75319	DUSP11	RNA/RNP complex-1-interacting phosphatase	1.00261	0.540299	1.85566	0.891934	5.76477e-16	3.82561e-15
P46781	RPS9	40S ribosomal protein S9	0.464413	0.301898	1.53831	0.621348	5.76477e-16	3.82561e-15
P11388	TOP2A	DNA topoisomerase 2-alpha	0.345938	0.211694	1.63414	0.708533	6.34946e-16	4.20123e-15
O94905	ERLIN2	Erlin-2	1.33893	1.9252	0.695476	-0.523926	6.66335e-16	4.39169e-15
Q5K651	SAMD9	Sterile alpha motif domain-containing protein 9	1.98318	1.12776	1.75851	0.81435	6.82597e-16	4.48137e-15
P62753	RPS6	40S ribosomal protein S6	0.259546	0.173176	1.49874	0.583754	6.82597e-16	4.48137e-15
Q96JQ0	DCHS1	Protocadherin-16	1.09763	2.23151	0.491877	-1.02363	7.16305e-16	4.68898e-15
P01594	IGKV1-33	Immunoglobulin kappa variable 1-33	2.0843	5.55613	0.375135	-1.41452	7.69963e-16	5.03047e-15
Q8N335	GPD1L	Glycerol-3-phosphate dehydrogenase 1-like protein	0.853301	1.36656	0.624415	-0.679422	7.88714e-16	5.13806e-15
Q08431	MFGE8	Lactadherin	1.96247	3.42949	0.572235	-0.805321	7.88714e-16	5.13806e-15
Q9ULV4	CORO1C	Coronin-1C	1.59575	2.4715	0.64566	-0.631153	8.07915e-16	5.24795e-15
P55287	CDH11	Cadherin-11	1.80362	3.04004	0.593288	-0.753195	8.07915e-16	5.24795e-15
Q6PL18	ATAD2	ATPase family AAA domain-containing protein 2	0.807571	0.544061	1.48434	0.569822	8.47709e-16	5.49586e-15
O95786	DDX58	Probable ATP-dependent RNA helicase DDX58	2.45013	1.65898	1.47689	0.562559	8.47709e-16	5.49586e-15
P54760	EPHB4	Ephrin type-B receptor 4	0.98581	1.49642	0.658777	-0.602139	8.89433e-16	5.75531e-15
Q9P0V9	SEPTIN10	Septin-10	1.12056	1.73299	0.646604	-0.629046	9.11048e-16	5.87265e-15
P24043	LAMA2	Laminin subunit alpha-2	1.80339	3.4029	0.529957	-0.916052	9.11048e-16	5.87265e-15
Q9UGM5	FETUB	Fetuin-B	1.42536	4.52975	0.314667	-1.6681	9.11048e-16	5.87265e-15
Q14914	PTGR1	Prostaglandin reductase 1	0.679076	0.991105	0.685171	-0.545464	9.33179e-16	6.00957e-15
O96017	CHEK2	Serine/threonine-protein kinase Chk2	0.487591	0.331593	1.47045	0.556258	9.5584e-16	6.1321e-15
P08582	MELTF	Melanotransferrin	1.85611	3.36818	0.551072	-0.859687	9.5584e-16	6.1321e-15
Q96A08	HIST1H2BA	Histone H2B type 1-A	0.740144	0.371456	1.99255	0.994613	1.0028e-15	6.39688e-15
Q99880	HIST1H2BL	Histone H2B type 1-L	0.740144	0.371456	1.99255	0.994613	1.0028e-15	6.39688e-15
P01742	IGHV1-69	Immunoglobulin heavy variable 1-69	1.4361	3.41369	0.42069	-1.24917	1.02713e-15	6.53969e-15
P60981	DSTN	Destrin	0.849529	1.26834	0.669795	-0.578209	1.05203e-15	6.69196e-15
P14649	MYL6B	Myosin light chain 6B	0.859849	1.31047	0.656138	-0.607929	1.07753e-15	6.84128e-15
P31949	S100A11	Protein S100-A11	2.34265	1.3715	1.7081	0.772392	1.13038e-15	7.1633e-15
Q86W56	PARG	Poly(ADP-ribose) glycohydrolase	0.754419	0.511251	1.47563	0.561334	1.13038e-15	7.1633e-15
P04040	CAT	Catalase	1.63809	2.79853	0.585341	-0.772651	1.15775e-15	7.32987e-15
A0AV96	RBM47	RNA-binding protein 47	3.08435	2.05466	1.50115	0.586064	1.18577e-15	7.48622e-15
Q8TBY0	RBM46	Probable RNA-binding protein 46	3.08435	2.05466	1.50115	0.586064	1.18577e-15	7.48622e-15
Q9NQ94	A1CF	APOBEC1 complementation factor	3.08435	2.05466	1.50115	0.586064	1.18577e-15	7.48622e-15
Q99538	LGMN	Legumain	3.33308	2.01921	1.65068	0.723064	1.24384e-15	7.83815e-15
Q86VI3	IQGAP3	Ras GTPase-activating-like protein IQGAP3	1.00499	0.672305	1.49484	0.579995	1.24384e-15	7.83815e-15
Q92522	H1FX	Histone H1x	0.119245	0.179665	0.663705	-0.591386	1.27391e-15	8.02017e-15
Q9UK76	JPT1	Jupiter microtubule associated homolog 1	0.101997	0.152618	0.668312	-0.581405	1.3047e-15	8.19873e-15
Q9H7B2	RPF2	Ribosome production factor 2 homolog	0.411744	0.285478	1.44229	0.528366	1.33623e-15	8.38901e-15
Q86TC9	MYPN	Myopalladin	1.01389	1.54923	0.654444	-0.611658	1.3685e-15	8.56771e-15
Q8WX93	PALLD	Palladin	1.01389	1.54923	0.654444	-0.611658	1.3685e-15	8.56771e-15
Q8N126	CADM3	Cell adhesion molecule 3	1.03726	2.75349	0.376707	-1.40849	1.40154e-15	8.74213e-15
Q8NI99	ANGPTL6	Angiopoietin-related protein 6	1.62237	2.88944	0.561484	-0.832684	1.43537e-15	8.94486e-15
O00469	PLOD2	Procollagen-lysine,2-oxoglutarate 5-dioxygenase 2	0.724503	0.448529	1.61529	0.691792	1.47e-15	9.13536e-15
Q9UKU9	ANGPTL2	Angiopoietin-related protein 2	1.62237	2.88944	0.561484	-0.832684	1.47e-15	9.13536e-15
O76095	JTB	Protein JTB	1.64068	0.966526	1.6975	0.763414	1.50545e-15	9.32991e-15
Q5KU26	COLEC12	Collectin-12	1.4132	2.98056	0.474138	-1.07662	1.54174e-15	9.52859e-15
P08123	COL1A2	Collagen alpha-2(I) chain	2.81156	5.93067	0.474072	-1.07682	1.54174e-15	9.52859e-15
P32418	SLC8A1	Sodium/calcium exchanger 1	1.54778	2.71425	0.570241	-0.810356	1.65588e-15	1.02059e-14
P50895	BCAM	Basal cell adhesion molecule	1.71471	3.7607	0.455955	-1.13304	1.73655e-15	1.06837e-14
P09104	ENO2	Gamma-enolase	1.10528	1.71926	0.642879	-0.637381	1.77832e-15	1.09208e-14
Q9Y6N5	SQOR	Sulfide:quinone oxidoreductase, mitochondrial	2.96537	2.06524	1.43585	0.521905	2.00251e-15	1.22307e-14
P35268	RPL22	60S ribosomal protein L22	0.851682	0.449584	1.89438	0.921724	2.05058e-15	1.24904e-14
Q96PP8	GBP5	Guanylate-binding protein 5	2.29214	1.32101	1.73514	0.79505	2.15015e-15	1.30615e-14
P02654	APOC1	Apolipoprotein C-I	1.92098	4.82625	0.398027	-1.32906	2.15015e-15	1.30615e-14
Q14314	FGL2	Fibroleukin	2.29638	3.80448	0.6036	-0.728336	2.42038e-15	1.46635e-14
Q9UM22	EPDR1	Mammalian ependymin-related protein 1	0.814252	1.70011	0.478941	-1.06208	2.42038e-15	1.46635e-14
Q9H008	LHPP	Phospholysine phosphohistidine inorganic pyrophosphate phosphatase	2.66187	3.97168	0.670212	-0.57731	2.5983e-15	1.56292e-14
Q7Z7K6	CENPV	Centromere protein V	0.191117	0.313801	0.609038	-0.715397	2.66042e-15	1.59886e-14
Q8IYM9	TRIM22	E3 ubiquitin-protein ligase TRIM22	3.48211	2.31796	1.50223	0.58711	2.724e-15	1.63561e-14
P16422	EPCAM	Epithelial cell adhesion molecule	3.56093	1.46448	2.43153	1.28187	2.85569e-15	1.7086e-14
Q6PIU2	NCEH1	Neutral cholesterol ester hydrolase 1	1.54109	0.932878	1.65197	0.724191	2.92386e-15	1.74784e-14
Q14978	NOLC1	Nucleolar and coiled-body phosphoprotein 1	0.10766	0.152554	0.705715	-0.502841	2.99364e-15	1.78009e-14
O15230	LAMA5	Laminin subunit alpha-5	1.54879	2.73671	0.565931	-0.821302	2.99364e-15	1.78009e-14
Q9Y547	HSPB11	Intraflagellar transport protein 25 homolog	0.709783	0.420917	1.68628	0.753844	3.21295e-15	1.89879e-14
P52732	KIF11	Kinesin-like protein KIF11	0.447078	0.312166	1.43218	0.518211	3.36787e-15	1.97995e-14
P09038	FGF2	Fibroblast growth factor 2	0.352347	0.657075	0.536236	-0.899061	3.44807e-15	2.02357e-14
P07196	NEFL	Neurofilament light polypeptide	1.01353	2.77223	0.365599	-1.45167	3.61414e-15	2.11551e-14
P06493	CDK1	Cyclin-dependent kinase 1	0.48181	0.336878	1.43022	0.51624	3.70011e-15	2.15834e-14
Q14432	PDE3A	cGMP-inhibited 3',5'-cyclic phosphodiesterase A	0.197168	0.368565	0.534961	-0.902493	3.70011e-15	2.15834e-14
Q969G5	CAVIN3	Caveolae-associated protein 3	1.1259	2.76613	0.407032	-1.29679	3.97026e-15	2.30398e-14
P00488	F13A1	Coagulation factor XIII A chain	2.8251	5.57161	0.507052	-0.979793	4.4643e-15	2.57298e-14
G2XKQ0	SUMO1P1	Small ubiquitin-related modifier 5	0.602609	0.414864	1.45255	0.538583	4.57013e-15	2.63173e-14
Q9UBP9	GULP1	PTB domain-containing engulfment adapter protein 1	0.937025	1.53496	0.610457	-0.712037	4.78927e-15	2.75087e-14
P07339	CTSD	Cathepsin D	3.04136	1.94597	1.5629	0.644228	5.1375e-15	2.92846e-14
P09758	TACSTD2	Tumor-associated calcium signal transducer 2	4.63799	2.04038	2.2731	1.18466	6.19264e-15	3.48285e-14
Q9Y4J8	DTNA	Dystrobrevin alpha	1.18138	2.09223	0.56465	-0.824572	6.19264e-15	3.48285e-14
O14561	NDUFAB1	Acyl carrier protein, mitochondrial	0.53696	0.348786	1.53951	0.622472	6.3387e-15	3.5561e-14
P84157	MXRA7	Matrix-remodeling-associated protein 7	0.89586	1.9301	0.464152	-1.10733	6.3387e-15	3.5561e-14
Q14919	DRAP1	Dr1-associated corepressor	0.542351	0.38346	1.41436	0.50015	7.28896e-15	4.0555e-14
P13645	KRT10	Keratin, type I cytoskeletal 10	2.3985	3.96709	0.604598	-0.725951	7.28896e-15	4.0555e-14
Q7Z3Y7	KRT28	Keratin, type I cytoskeletal 28	2.3985	3.96709	0.604598	-0.725951	7.28896e-15	4.0555e-14
Q7Z3Y8	KRT27	Keratin, type I cytoskeletal 27	2.3985	3.96709	0.604598	-0.725951	7.28896e-15	4.0555e-14
Q7Z3Z0	KRT25	Keratin, type I cytoskeletal 25	2.3985	3.96709	0.604598	-0.725951	7.28896e-15	4.0555e-14
P20591	MX1	Interferon-induced GTP-binding protein Mx1	3.92606	1.94504	2.0185	1.01328	7.46042e-15	4.14406e-14
Q76L83	ASXL2	Putative Polycomb group protein ASXL2	0.701568	0.467673	1.50012	0.585081	7.46042e-15	4.14406e-14
P29350	PTPN6	Tyrosine-protein phosphatase non-receptor type 6	4.56846	2.84501	1.60578	0.683276	7.99899e-15	4.43228e-14
Q5U3C3	TMEM164	Transmembrane protein 164	1.11115	0.594543	1.86892	0.902201	8.18687e-15	4.51415e-14
Q07021	C1QBP	Complement component 1 Q subcomponent-binding protein, mitochondrial	0.520884	0.367808	1.41618	0.502009	8.57577e-15	4.72473e-14
Q6UXH9	PAMR1	Inactive serine protease PAMR1	1.20699	2.75648	0.437873	-1.19142	8.98284e-15	4.9369e-14
Q9UPR3	SMG5	Protein SMG5	1.13541	0.720436	1.57601	0.656273	9.40891e-15	5.15847e-14
P60059	SEC61G	Protein transport protein Sec61 subunit gamma	1.09403	1.63697	0.668328	-0.581372	1.10627e-14	6.03088e-14
Q5JTB6	PLAC9	Placenta-specific protein 9	1.20935	4.03326	0.299844	-1.73772	1.10627e-14	6.03088e-14
Q96T88	UHRF1	E3 ubiquitin-protein ligase UHRF1	0.778403	0.537601	1.44792	0.533981	1.15857e-14	6.31087e-14
Q9UBD5	ORC3	Origin recognition complex subunit 3	0.483397	0.310974	1.55446	0.636413	1.2416e-14	6.73597e-14
O43795	MYO1B	Unconventional myosin-Ib	1.90611	1.32972	1.43346	0.519507	1.2416e-14	6.73597e-14
P05161	ISG15	Ubiquitin-like protein ISG15	1.07378	0.636523	1.68694	0.754412	1.30018e-14	7.03682e-14
Q9UBG3	CRNN	Cornulin	1.39382	6.81558	0.204505	-2.28979	1.33048e-14	7.18928e-14
P01743	IGHV1-46	Immunoglobulin heavy variable 1-46	1.89109	4.6854	0.403613	-1.30895	1.39318e-14	7.51606e-14
Q8IWA5	SLC44A2	Choline transporter-like protein 2	1.90884	2.94886	0.647317	-0.627455	1.42562e-14	7.67876e-14
Q9NZU5	LMCD1	LIM and cysteine-rich domains protein 1	2.11994	3.52313	0.60172	-0.732837	1.45879e-14	7.85118e-14
P55001	MFAP2	Microfibrillar-associated protein 2	2.02684	3.65007	0.555288	-0.848691	1.52744e-14	8.18148e-14
Q9UGI8	TES	Testin	0.930831	1.72302	0.540233	-0.888347	1.52744e-14	8.18148e-14
P19971	TYMP	Thymidine phosphorylase	3.74812	2.16301	1.73283	0.793127	1.56294e-14	8.35839e-14
Q96SW2	CRBN	Protein cereblon	1.36418	2.10904	0.646824	-0.628554	1.59926e-14	8.49873e-14
Q15847	ADIRF	Adipogenesis regulatory factor	1.5996	3.84758	0.415742	-1.26624	1.59926e-14	8.49873e-14
P00973	OAS1	2'-5'-oligoadenylate synthase 1	2.40741	1.47524	1.63188	0.706535	1.6364e-14	8.68246e-14
Q9UKX5	ITGA11	Integrin alpha-11	0.446269	0.695372	0.64177	-0.639872	1.6744e-14	8.86315e-14
P07451	CA3	Carbonic anhydrase 3	1.2853	3.2223	0.398877	-1.32598	1.6744e-14	8.86315e-14
P63165	SUMO1	Small ubiquitin-related modifier 1	0.602609	0.414864	1.45255	0.538583	1.75301e-14	9.26474e-14
P16157	ANK1	Ankyrin-1	1.63955	3.19176	0.513684	-0.961047	1.79367e-14	9.45739e-14
Q9BXR6	CFHR5	Complement factor H-related protein 5	1.59378	3.58065	0.445109	-1.16777	1.87778e-14	9.87775e-14
P29466	CASP1	Caspase-1	3.41355	2.35872	1.44721	0.533273	2.05782e-14	1.07912e-13
Q9Y4D7	PLXND1	Plexin-D1	1.44263	2.42576	0.594711	-0.749739	2.05782e-14	1.07912e-13
Q9UHQ4	BCAP29	B-cell receptor-associated protein 29	1.23768	1.83927	0.672919	-0.571495	2.20389e-14	1.15035e-13
P55327	TPD52	Tumor protein D52	0.653263	0.383352	1.70408	0.768993	2.25481e-14	1.17512e-13
Q9HC16	APOBEC3G	DNA dC->dU-editing enzyme APOBEC-3G	2.86242	1.86468	1.53507	0.618305	2.47033e-14	1.28149e-13
P0DP03	IGHV3-30-5	Immunoglobulin heavy variable 3-30-5	2.49257	6.73288	0.370208	-1.43359	2.47033e-14	1.28149e-13
P09884	POLA1	DNA polymerase alpha catalytic subunit	0.491893	0.281875	1.74508	0.803291	2.5273e-14	1.30703e-13
Q9UHB6	LIMA1	LIM domain and actin-binding protein 1	0.881105	0.577744	1.52508	0.608883	2.5273e-14	1.30703e-13
O00115	DNASE2	Deoxyribonuclease-2-alpha	1.00105	0.666679	1.50155	0.586453	2.5273e-14	1.30703e-13
Q14444	CAPRIN1	Caprin-1	0.38805	0.274167	1.41538	0.501187	2.70607e-14	1.39308e-13
P28074	PSMB5	Proteasome subunit beta type-5	0.319278	0.452234	0.706002	-0.502256	2.70607e-14	1.39308e-13
Q92688	ANP32B	Acidic leucine-rich nuclear phosphoprotein 32 family member B	0.511496	0.329604	1.55185	0.63399	2.76838e-14	1.42082e-13
O15347	HMGB3	High mobility group protein B3	0.278367	0.195352	1.42495	0.510909	2.76838e-14	1.42082e-13
Q16719	KYNU	Kynureninase	0.501816	0.352796	1.4224	0.508323	2.76838e-14	1.42082e-13
Q6P3S1	DENND1B	DENN domain-containing protein 1B	2.43727	1.37242	1.77589	0.828542	2.89727e-14	1.48022e-13
Q12874	SF3A3	Splicing factor 3A subunit 3	0.682441	0.477529	1.42911	0.515116	2.89727e-14	1.48022e-13
P12821	ACE	Angiotensin-converting enzyme	2.0122	3.61253	0.557006	-0.844236	3.03206e-14	1.54324e-13
Q5EG05	CARD16	Caspase recruitment domain-containing protein 16	3.33264	2.30539	1.44559	0.531654	3.32039e-14	1.68364e-13
P43405	SYK	Tyrosine-protein kinase SYK	2.93537	2.07268	1.41622	0.502043	3.32039e-14	1.68364e-13
Q8NFD2	ANKK1	Ankyrin repeat and protein kinase domain-containing protein 1	2.93537	2.07268	1.41622	0.502043	3.32039e-14	1.68364e-13
Q8IY21	DDX60	Probable ATP-dependent RNA helicase DDX60	2.74731	1.90944	1.43881	0.524873	3.55417e-14	1.79544e-13
Q9UNN8	PROCR	Endothelial protein C receptor	0.93446	1.86377	0.501382	-0.996018	3.55417e-14	1.79544e-13
P19784	CSNK2A2	Casein kinase II subunit alpha'	0.722894	0.508602	1.42134	0.507248	3.63564e-14	1.83248e-13
P41567	EIF1	Eukaryotic translation initiation factor 1	0.720856	0.494634	1.45735	0.543348	3.71895e-14	1.87028e-13
Q08345	DDR1	Epithelial discoidin domain-containing receptor 1	2.24721	1.57872	1.42344	0.509377	3.71895e-14	1.87028e-13
P36888	FLT3	Receptor-type tyrosine-protein kinase FLT3	1.28002	2.64799	0.483395	-1.04873	3.98029e-14	1.99576e-13
P62745	RHOB	Rho-related GTP-binding protein RhoB	0.649267	1.12406	0.577608	-0.791836	4.07135e-14	2.03991e-13
Q13753	LAMC2	Laminin subunit gamma-2	3.1564	1.7425	1.81143	0.857125	4.16446e-14	2.08501e-13
P00374	DHFR	Dihydrofolate reductase	0.194355	0.113257	1.71605	0.779093	4.35701e-14	2.17335e-13
Q96SQ9	CYP2S1	Cytochrome P450 2S1	2.56031	1.78321	1.43579	0.521844	4.35701e-14	2.17335e-13
O14791	APOL1	Apolipoprotein L1	2.11951	3.56948	0.593786	-0.751986	4.35701e-14	2.17335e-13
Q6DKI2	LGALS9C	Galectin-9C	1.75734	1.20447	1.45901	0.544994	4.45654e-14	2.21808e-13
P04921	GYPC	Glycophorin-C	1.80233	5.40861	0.333233	-1.5854	4.45654e-14	2.21808e-13
P28676	GCA	Grancalcin	4.91059	2.78162	1.76537	0.819972	4.5583e-14	2.26706e-13
P53634	CTSC	Dipeptidyl peptidase 1	1.83434	1.2407	1.47847	0.564104	5.84009e-14	2.86653e-13
P40261	NNMT	Nicotinamide N-methyltransferase	1.36299	0.819304	1.66359	0.734304	6.10855e-14	2.9896e-13
Q7Z2K6	ERMP1	Endoplasmic reticulum metallopeptidase 1	2.51055	1.71116	1.46716	0.553026	6.2473e-14	3.05529e-13
Q9BW19	KIFC1	Kinesin-like protein KIFC1	0.683081	0.457232	1.49395	0.579131	6.38914e-14	3.11563e-13
O43405	COCH	Cochlin	0.921644	2.06366	0.446606	-1.16293	6.38914e-14	3.11563e-13
P01768	IGHV3-30	Immunoglobulin heavy variable 3-30	2.49257	6.73288	0.370208	-1.43359	6.38914e-14	3.11563e-13
Q9C0D9	SELENOI	Ethanolaminephosphotransferase 1	0.810541	0.460128	1.76156	0.816851	6.53414e-14	3.17945e-13
P62913	RPL11	60S ribosomal protein L11	0.502488	0.349403	1.43813	0.524196	6.53414e-14	3.17945e-13
O75636	FCN3	Ficolin-3	1.51295	3.22506	0.469124	-1.09196	6.68238e-14	3.24923e-13
P00749	PLAU	Urokinase-type plasminogen activator	2.44507	1.46653	1.66724	0.737464	7.14721e-14	3.4603e-13
P10589	NR2F1	COUP transcription factor 1	0.758782	1.14977	0.65994	-0.599593	7.47462e-14	3.60845e-13
P24468	NR2F2	COUP transcription factor 2	0.758782	1.14977	0.65994	-0.599593	7.47462e-14	3.60845e-13
Q13237	PRKG2	cGMP-dependent protein kinase 2	1.93322	4.64718	0.415998	-1.26535	7.99354e-14	3.84248e-13
Q07507	DPT	Dermatopontin	1.27396	3.88466	0.327946	-1.60847	8.359e-14	4.00674e-13
Q96S97	MYADM	Myeloid-associated differentiation marker	0.9806	1.68814	0.580877	-0.783697	8.74086e-14	4.17791e-13
Q9ULI0	ATAD2B	ATPase family AAA domain-containing protein 2B	0.524106	0.301191	1.74011	0.799179	9.34602e-14	4.44199e-13
A0A0C4DH34	IGHV4-28	Immunoglobulin heavy variable 4-28	1.90091	6.67187	0.284914	-1.8114	9.34602e-14	4.44199e-13
Q9H479	FN3K	Fructosamine-3-kinase	0.619024	1.08107	0.572605	-0.804389	9.55675e-14	4.53576e-13
Q3B8N2	LGALS9B	Galectin-9B	1.75734	1.20447	1.45901	0.544994	9.77215e-14	4.62498e-13
Q9H8H3	METTL7A	Methyltransferase-like protein 7A	4.4076	7.13941	0.617362	-0.695811	9.99232e-14	4.71926e-13
P01706	IGLV2-11	Immunoglobulin lambda variable 2-11	1.96645	4.81668	0.408259	-1.29244	9.99232e-14	4.71926e-13
P51608	MECP2	Methyl-CpG-binding protein 2	0.899875	1.37507	0.65442	-0.611712	1.02174e-13	4.81207e-13
P53778	MAPK12	Mitogen-activated protein kinase 12	2.98789	2.04571	1.46056	0.546521	1.09228e-13	5.12642e-13
P14923	JUP	Junction plakoglobin	2.30988	1.44458	1.599	0.677173	1.14194e-13	5.35579e-13
Q9H2X3	CLEC4M	C-type lectin domain family 4 member M	1.93588	3.83868	0.504309	-0.98762	1.19383e-13	5.56049e-13
Q9NNX6	CD209	CD209 antigen	1.93588	3.83868	0.504309	-0.98762	1.19383e-13	5.56049e-13
P14209	CD99	CD99 antigen	1.35353	2.99244	0.452316	-1.1446	1.19383e-13	5.56049e-13
Q13395	TARBP1	Probable methyltransferase TARBP1	1.54777	1.07281	1.44272	0.52879	1.22063e-13	5.67749e-13
P23381	WARS	Tryptophan--tRNA ligase, cytoplasmic	2.53521	1.37488	1.84395	0.882796	1.27602e-13	5.91882e-13
P08572	COL4A2	Collagen alpha-2(IV) chain	1.79291	3.36347	0.533055	-0.907643	1.33389e-13	6.16602e-13
Q9UNS1	TIMELESS	Protein timeless homolog	0.364087	0.234372	1.55346	0.635484	1.36378e-13	6.29127e-13
Q92820	GGH	Gamma-glutamyl hydrolase	1.11099	0.780365	1.42368	0.509626	1.39432e-13	6.42341e-13
P16452	EPB42	Erythrocyte membrane protein band 4.2	1.52598	2.99923	0.508791	-0.974855	1.42554e-13	6.55828e-13
Q13283	G3BP1	Ras GTPase-activating protein-binding protein 1	0.557023	0.375557	1.48319	0.568705	1.45745e-13	6.68683e-13
P17813	ENG	Endoglin	1.4355	2.08549	0.688324	-0.538841	1.49006e-13	6.82716e-13
Q05682	CALD1	Caldesmon	0.521295	1.01584	0.513165	-0.962507	1.49006e-13	6.82716e-13
Q14257	RCN2	Reticulocalbin-2	0.549804	0.341385	1.61051	0.687519	1.52338e-13	6.95153e-13
P60709	ACTB	Actin, cytoplasmic 1	1.1538	1.71491	0.672805	-0.57174	1.52338e-13	6.95153e-13
O00767	SCD	Acyl-CoA desaturase	0.416147	0.253447	1.64195	0.715407	1.59224e-13	7.24616e-13
Q53RD9	FBLN7	Fibulin-7	1.16978	2.88421	0.405579	-1.30194	1.59224e-13	7.24616e-13
Q8N543	OGFOD1	Prolyl 3-hydroxylase OGFOD1	0.369119	0.257894	1.43129	0.517311	1.98514e-13	8.93179e-13
P47914	RPL29	60S ribosomal protein L29	0.0597911	0.138046	0.433126	-1.20714	2.07445e-13	9.3088e-13
O15264	MAPK13	Mitogen-activated protein kinase 13	3.01618	2.11889	1.42347	0.509416	2.31535e-13	1.03417e-12
O60573	EIF4E2	Eukaryotic translation initiation factor 4E type 2	0.725814	0.505387	1.43615	0.52221	2.36673e-13	1.05363e-12
Q9NPY3	CD93	Complement component C1q receptor	1.82589	2.89065	0.631654	-0.662794	2.36673e-13	1.05363e-12
Q9BR39	JPH2	Junctophilin-2	0.737974	1.70645	0.432461	-1.20936	2.36673e-13	1.05363e-12
P22223	CDH3	Cadherin-3	2.7208	1.71997	1.58189	0.661653	2.41923e-13	1.07417e-12
Q8IY34	SLC15A3	Solute carrier family 15 member 3	2.62005	1.68086	1.55875	0.640394	2.52768e-13	1.12085e-12
P33241	LSP1	Lymphocyte-specific protein 1	3.76413	2.10971	1.7842	0.835274	2.58368e-13	1.14343e-12
Q9BSA4	TTYH2	Protein tweety homolog 2	1.16752	2.45432	0.475697	-1.07188	2.82014e-13	1.24481e-12
P60660	MYL6	Myosin light polypeptide 6	1.17612	1.68601	0.69758	-0.51957	3.07782e-13	1.34797e-12
O60551	NMT2	Glycylpeptide N-tetradecanoyltransferase 2	0.863802	1.24879	0.691709	-0.531762	3.14577e-13	1.37505e-12
Q9NZI8	IGF2BP1	Insulin-like growth factor 2 mRNA-binding protein 1	0.0876923	0.125122	0.700854	-0.512815	3.58552e-13	1.56221e-12
P30085	CMPK1	UMP-CMP kinase	1.26001	0.888068	1.41882	0.504692	3.66446e-13	1.5925e-12
A0A0B4J1X8	IGHV3-43	Immunoglobulin heavy variable 3-43	2.10207	6.60427	0.31829	-1.65158	3.66446e-13	1.5925e-12
P31947	SFN	14-3-3 protein sigma	2.85384	1.44276	1.97805	0.984077	3.91167e-13	1.69556e-12
P09211	GSTP1	Glutathione S-transferase P	1.7437	1.20194	1.45073	0.536781	4.08549e-13	1.76637e-12
Q6YHK3	CD109	CD109 antigen	2.45632	3.60832	0.680738	-0.554828	4.08549e-13	1.76637e-12
P48552	NRIP1	Nuclear receptor-interacting protein 1	0.840963	1.25304	0.671141	-0.575313	4.36055e-13	1.87807e-12
Q09666	AHNAK	Neuroblast differentiation-associated protein AHNAK	0.840963	1.25304	0.671141	-0.575313	4.36055e-13	1.87807e-12
P07197	NEFM	Neurofilament medium polypeptide	1.09031	3.09059	0.352782	-1.50315	4.55393e-13	1.95264e-12
Q9NPH2	ISYNA1	Inositol-3-phosphate synthase 1	1.47194	2.35592	0.624783	-0.678573	4.65376e-13	1.99291e-12
A0A0B4J1V0	IGHV3-15	Immunoglobulin heavy variable 3-15	1.94777	5.79693	0.336001	-1.57346	4.65376e-13	1.99291e-12
P16949	STMN1	Stathmin	0.313047	0.19795	1.58144	0.661242	4.8599e-13	2.07198e-12
Q9H169	STMN4	Stathmin-4	0.313047	0.19795	1.58144	0.661242	4.8599e-13	2.07198e-12
O60462	NRP2	Neuropilin-2	1.6691	2.90527	0.574508	-0.799602	4.96631e-13	2.11601e-12
Q76M96	CCDC80	Coiled-coil domain-containing protein 80	1.73711	3.10641	0.559203	-0.838556	5.53362e-13	2.35179e-12
P36222	CHI3L1	Chitinase-3-like protein 1	0.527681	0.357619	1.47554	0.561242	5.90406e-13	2.49978e-12
O75923	DYSF	Dysferlin	2.23509	3.32187	0.672842	-0.57166	6.03286e-13	2.54633e-12
P30711	GSTT1	Glutathione S-transferase theta-1	0.862222	1.39748	0.616985	-0.696694	6.03286e-13	2.54633e-12
P26373	RPL13	60S ribosomal protein L13	0.0894741	0.150395	0.594928	-0.749214	6.16443e-13	2.59699e-12
Q15125	EBP	3-beta-hydroxysteroid-Delta(8),Delta(7)-isomerase	0.844394	0.461237	1.83072	0.872409	6.57625e-13	2.75672e-12
Q9NTJ4	MAN2C1	Alpha-mannosidase 2C1	1.54563	2.41167	0.640896	-0.641838	6.57625e-13	2.75672e-12
A0A0J9YVY3	IGHV7-4-1	Immunoglobulin heavy variable 7-4-1	1.84113	5.23309	0.351825	-1.50707	6.57625e-13	2.75672e-12
P25774	CTSS	Cathepsin S	4.08346	2.28373	1.78807	0.838401	7.32342e-13	3.06042e-12
P05362	ICAM1	Intercellular adhesion molecule 1	3.43309	2.26664	1.51462	0.598955	7.81108e-13	3.24812e-12
O95477	ABCA1	Phospholipid-transporting ATPase ABCA1	1.6523	3.7747	0.437729	-1.19189	7.98061e-13	3.31249e-12
Q13201	MMRN1	Multimerin-1	1.28533	2.83887	0.452762	-1.14318	8.33057e-13	3.45138e-12
P04233	CD74	HLA class II histocompatibility antigen gamma chain	4.82103	3.21997	1.49723	0.582296	8.51116e-13	3.51756e-12
P02746	C1QB	Complement C1q subcomponent subunit B	2.35546	3.83237	0.614622	-0.702229	8.88393e-13	3.66489e-12
A0A0C4DH72	IGKV1-6	Immunoglobulin kappa variable 1-6	2.36073	5.04428	0.468001	-1.09542	9.07628e-13	3.73967e-12
P10316	HLA-A	HLA class I histocompatibility antigen, A-69 alpha chain	1.67244	1.13353	1.47543	0.561132	9.27272e-13	3.80898e-12
Q8WWX9	SELENOM	Selenoprotein M	1.07873	1.68483	0.640257	-0.643278	9.47333e-13	3.88902e-12
P24821	TNC	Tenascin	4.71666	2.62556	1.79644	0.845141	9.67819e-13	3.95867e-12
O60716	CTNND1	Catenin delta-1	1.43262	0.929695	1.54095	0.623823	9.67819e-13	3.95867e-12
A0A0B4J1X5	IGHV3-74	Immunoglobulin heavy variable 3-74	3.85913	11.1335	0.346623	-1.52856	1.0542e-12	4.29898e-12
P02794	FTH1	Ferritin heavy chain	2.34206	3.71972	0.629635	-0.667413	1.10019e-12	4.47839e-12
Q8TCB0	IFI44	Interferon-induced protein 44	1.99466	1.31276	1.51944	0.603541	1.17288e-12	4.75993e-12
P58107	EPPK1	Epiplakin	0.529878	0.372766	1.42147	0.507388	1.19814e-12	4.85661e-12
A0A0C4DH73	IGKV1-12	Immunoglobulin kappa variable 1-12	2.36073	5.04428	0.468001	-1.09542	1.27717e-12	5.16456e-12
Q9UL46	PSME2	Proteasome activator complex subunit 2	1.48515	1.03659	1.43273	0.518768	1.33268e-12	5.36971e-12
P04432	IGKV1D-39	Immunoglobulin kappa variable 1D-39	2.36073	5.04428	0.468001	-1.09542	1.42041e-12	5.69598e-12
P60033	CD81	CD81 antigen	1.28917	3.88136	0.332143	-1.59012	1.45089e-12	5.80787e-12
Q99661	KIF2C	Kinesin-like protein KIF2C	0.289508	0.178635	1.62066	0.696584	1.48202e-12	5.90793e-12
O76070	SNCG	Gamma-synuclein	0.317942	0.662216	0.480119	-1.05854	1.48202e-12	5.90793e-12
Q9H4E7	DEF6	Differentially expressed in FDCP 6 homolog	2.87649	2.03314	1.4148	0.500603	1.51379e-12	6.02039e-12
P69905	HBA1	Hemoglobin subunit alpha	2.32496	4.49612	0.517104	-0.951474	1.57937e-12	6.2701e-12
P16112	ACAN	Aggrecan core protein	1.21569	2.48303	0.4896	-1.03032	1.71899e-12	6.80439e-12
P12532	CKMT1A	Creatine kinase U-type, mitochondrial	3.2536	1.95913	1.66074	0.731822	1.75575e-12	6.93768e-12
P01597	IGKV1-39	Immunoglobulin kappa variable 1-39	2.36073	5.04428	0.468001	-1.09542	1.75575e-12	6.93768e-12
Q9BQL6	FERMT1	Fermitin family homolog 1	2.00059	1.32224	1.51303	0.597443	1.79328e-12	7.07767e-12
P28289	TMOD1	Tropomodulin-1	0.952846	2.25948	0.421711	-1.24568	1.79328e-12	7.07767e-12
P01767	IGHV3-53	Immunoglobulin heavy variable 3-53	3.85913	11.1335	0.346623	-1.52856	1.83159e-12	7.20361e-12
P62805	HIST1H4A	Histone H4	0.603309	0.373266	1.6163	0.692693	1.91064e-12	7.49269e-12
Q8IXQ5	KLHL7	Kelch-like protein 7	0.753598	0.411976	1.82923	0.871235	1.95141e-12	7.64369e-12
Q5SRE7	PHYHD1	Phytanoyl-CoA dioxygenase domain-containing protein 1	2.0256	3.39415	0.596791	-0.744702	1.95141e-12	7.64369e-12
Q8IXM3	MRPL41	39S ribosomal protein L41, mitochondrial	0.59698	0.418253	1.42732	0.513307	2.1232e-12	8.28773e-12
P43358	MAGEA4	Melanoma-associated antigen 4	0.0498493	0.0728001	0.684743	-0.546366	2.1232e-12	8.28773e-12
Q07092	COL16A1	Collagen alpha-1(XVI) chain	1.62891	4.20514	0.387362	-1.36825	2.16842e-12	8.45933e-12
Q9BY43	CHMP4A	Charged multivesicular body protein 4a	0.981002	1.70871	0.574118	-0.800582	2.21458e-12	8.62943e-12
Q9Y3Z3	SAMHD1	Deoxynucleoside triphosphate triphosphohydrolase SAMHD1	3.26575	2.30621	1.41607	0.501893	2.2617e-12	8.79274e-12
P31327	CPS1	Carbamoyl-phosphate synthase [ammonia], mitochondrial	0.0837197	0.119872	0.698412	-0.517851	2.3098e-12	8.96942e-12
Q9UHC6	CNTNAP2	Contactin-associated protein-like 2	1.80233	5.40861	0.333233	-1.5854	2.3098e-12	8.96942e-12
P16234	PDGFRA	Platelet-derived growth factor receptor alpha	1.28002	2.64799	0.483395	-1.04873	2.51246e-12	9.70057e-12
P61956	SUMO2	Small ubiquitin-related modifier 2	0.429569	0.303124	1.41714	0.502983	2.56579e-12	9.88385e-12
P07305	H1F0	Histone H1.0	0.174174	0.251178	0.693429	-0.528179	2.56579e-12	9.88385e-12
P0C0L4	C4A	Complement C4-A	1.77935	4.96861	0.358118	-1.48149	2.56579e-12	9.88385e-12
Q96PP9	GBP4	Guanylate-binding protein 4	3.18568	2.2391	1.42275	0.508682	2.6758e-12	1.02842e-11
P38432	COIL	Coilin	1.07402	0.645099	1.66489	0.735423	2.73253e-12	1.04962e-11
Q9NQZ2	UTP3	Something about silencing protein 10	0.490893	0.330322	1.4861	0.571536	2.90988e-12	1.11584e-11
Q6ZMG9	CERS6	Ceramide synthase 6	0.53197	0.37292	1.4265	0.512478	3.0985e-12	1.18615e-11
P50135	HNMT	Histamine N-methyltransferase	1.62769	2.44127	0.666738	-0.584807	3.36875e-12	1.2845e-11
Q8NCL4	GALNT6	Polypeptide N-acetylgalactosaminyltransferase 6	2.57538	1.7921	1.43708	0.523139	3.43985e-12	1.30939e-11
P62854	RPS26	40S ribosomal protein S26	0.314739	0.200002	1.57368	0.654141	3.66208e-12	1.38851e-11
Q5JNZ5	RPS26P11	Putative 40S ribosomal protein S26-like 1	0.314739	0.200002	1.57368	0.654141	3.66208e-12	1.38851e-11
Q5SYB0	FRMPD1	FERM and PDZ domain-containing protein 1	1.38599	3.94186	0.351609	-1.50796	3.81799e-12	1.44357e-11
Q9UJY1	HSPB8	Heat shock protein beta-8	0.935282	1.47479	0.634182	-0.657032	3.98041e-12	1.50077e-11
Q9Y6Q5	AP1M2	AP-1 complex subunit mu-2	3.41348	2.35322	1.45056	0.536609	4.14959e-12	1.56107e-11
O95445	APOM	Apolipoprotein M	1.11953	2.80996	0.398414	-1.32766	4.14959e-12	1.56107e-11
Q8N884	CGAS	Cyclic GMP-AMP synthase	1.18537	0.832087	1.42458	0.510534	4.604e-12	1.72241e-11
P22897	MRC1	Macrophage mannose receptor 1	2.41356	3.87292	0.623189	-0.682259	4.604e-12	1.72241e-11
P01599	IGKV1-17	Immunoglobulin kappa variable 1-17	2.36073	5.04428	0.468001	-1.09542	4.70056e-12	1.75659e-11
Q9Y2D0	CA5B	Carbonic anhydrase 5B, mitochondrial	1.24576	2.51894	0.494558	-1.01579	4.79911e-12	1.79045e-11
A0A0C4DH42	IGHV3-66	Immunoglobulin heavy variable 3-66	3.85913	11.1335	0.346623	-1.52856	4.89969e-12	1.82696e-11
Q14112	NID2	Nidogen-2	2.20941	3.39823	0.650163	-0.621127	5.32306e-12	1.97936e-11
Q8IVF2	AHNAK2	Protein AHNAK2	0.93218	1.49821	0.622198	-0.684555	5.66392e-12	2.10147e-11
P18621	RPL17	60S ribosomal protein L17	0.260133	0.180724	1.43939	0.525462	5.90296e-12	2.18296e-11
Q14192	FHL2	Four and a half LIM domains protein 2	1.50823	1.01924	1.47976	0.565367	6.41106e-12	2.35923e-11
Q96K17	BTF3L4	Transcription factor BTF3 homolog 4	0.614698	0.402988	1.52535	0.609142	6.68094e-12	2.45586e-11
P61916	NPC2	NPC intracellular cholesterol transporter 2	1.57194	1.10152	1.42706	0.513045	6.68094e-12	2.45586e-11
Q92485	SMPDL3B	Acid sphingomyelinase-like phosphodiesterase 3b	2.08756	1.34716	1.5496	0.631896	6.82003e-12	2.5029e-11
Q9NYL9	TMOD3	Tropomodulin-3	0.544045	0.375445	1.44907	0.535123	7.25453e-12	2.65514e-11
Q9UI15	TAGLN3	Transgelin-3	1.00355	0.575921	1.74251	0.801169	7.55915e-12	2.75766e-11
Q92560	BAP1	Ubiquitin carboxyl-terminal hydrolase BAP1	0.580828	0.406665	1.42827	0.51427	7.71613e-12	2.81189e-11
Q8IW41	MAPKAPK5	MAP kinase-activated protein kinase 5	0.721742	0.462144	1.56172	0.64314	8.7273e-12	3.15651e-11
Q71RC2	LARP4	La-related protein 4	0.425234	0.297266	1.43048	0.516503	9.09237e-12	3.27976e-11
Q9BXD5	NPL	N-acetylneuraminate lyase	4.32382	2.65468	1.62875	0.703764	1.02797e-11	3.68638e-11
P01611	IGKV1D-12	Immunoglobulin kappa variable 1D-12	2.36073	5.04428	0.468001	-1.09542	1.02797e-11	3.68638e-11
P69891	HBG1	Hemoglobin subunit gamma-1	1.73752	3.19326	0.544122	-0.877999	1.07083e-11	3.83395e-11
Q8NAT1	POMGNT2	Protein O-linked-mannose beta-1,4-N-acetylglucosaminyltransferase 2	0.909157	1.41454	0.642724	-0.637729	1.09291e-11	3.90472e-11
P04183	TK1	Thymidine kinase, cytosolic	0.769091	0.464218	1.65674	0.728352	1.13841e-11	4.06085e-11
Q5QNW6	HIST2H2BF	Histone H2B type 2-F	0.620623	0.348225	1.78225	0.833697	1.16185e-11	4.14229e-11
P04278	SHBG	Sex hormone-binding globulin	1.04386	2.7186	0.383971	-1.38093	1.18577e-11	4.22309e-11
Q12791	KCNMA1	Calcium-activated potassium channel subunit alpha-1	1.41759	2.82529	0.501749	-0.994961	1.28635e-11	4.55247e-11
P02461	COL3A1	Collagen alpha-1(III) chain	1.8944	3.53629	0.535702	-0.900497	1.31277e-11	4.64112e-11
P45877	PPIC	Peptidyl-prolyl cis-trans isomerase C	1.20737	0.831391	1.45222	0.538265	1.39527e-11	4.9122e-11
P08473	MME	Neprilysin	1.64723	2.7259	0.604289	-0.726689	1.42388e-11	5.01031e-11
Q99877	HIST1H2BN	Histone H2B type 1-N	0.620623	0.348225	1.78225	0.833697	1.45307e-11	5.10503e-11
Q93045	STMN2	Stathmin-2	0.240643	0.136011	1.76929	0.823173	1.45307e-11	5.10503e-11
Q86XF0	DHFR2	Dihydrofolate reductase 2, mitochondrial	0.232708	0.154716	1.5041	0.588899	1.57579e-11	5.51035e-11
O95456	PSMG1	Proteasome assembly chaperone 1	0.497349	0.351237	1.41599	0.501811	1.57579e-11	5.51035e-11
Q96DG6	CMBL	Carboxymethylenebutenolidase homolog	0.505747	0.768696	0.657929	-0.603997	1.67443e-11	5.84017e-11
Q9Y446	PKP3	Plakophilin-3	2.87928	1.57307	1.83036	0.872127	1.70864e-11	5.95025e-11
P15924	DSP	Desmoplakin	2.73837	1.66306	1.64658	0.719475	1.70864e-11	5.95025e-11
Q8N2K0	ABHD12	Lysophosphatidylserine lipase ABHD12	1.48453	1.0453	1.42019	0.506086	1.70864e-11	5.95025e-11
O75339	CILP	Cartilage intermediate layer protein 1	1.13233	2.33208	0.485544	-1.04233	1.74353e-11	6.06549e-11
P12429	ANXA3	Annexin A3	0.684106	0.422312	1.61991	0.695909	1.8902e-11	6.54537e-11
O43688	PLPP2	Phospholipid phosphatase 2	1.06116	0.704058	1.50721	0.591876	1.8902e-11	6.54537e-11
Q9BQC6	MRPL57	Ribosomal protein 63, mitochondrial	0.342728	0.234724	1.46013	0.546095	2.0906e-11	7.21713e-11
Q6BCY4	CYB5R2	NADH-cytochrome b5 reductase 2	1.94166	2.83791	0.684185	-0.547543	2.17647e-11	7.50586e-11
Q9UM00	TMCO1	Calcium load-activated calcium channel	1.21234	0.849743	1.42672	0.512701	2.35868e-11	8.097e-11
P0DMN0	SULT1A4	Sulfotransferase 1A4	0.756664	1.21612	0.622197	-0.684556	2.35868e-11	8.097e-11
Q9NZP8	C1RL	Complement C1r subcomponent-like protein	1.02942	2.43699	0.422413	-1.24327	2.35868e-11	8.097e-11
P57053	H2BFS	Histone H2B type F-S	0.620623	0.348225	1.78225	0.833697	2.4553e-11	8.40731e-11
O94819	KBTBD11	Kelch repeat and BTB domain-containing protein 11	0.843838	1.561	0.540574	-0.887436	2.4553e-11	8.40731e-11
Q96KN2	CNDP1	Beta-Ala-His dipeptidase	1.23888	2.64306	0.468729	-1.09317	2.50505e-11	8.56898e-11
Q93079	HIST1H2BH	Histone H2B type 1-H	0.620623	0.350226	1.77206	0.825431	2.66031e-11	9.07706e-11
P58876	HIST1H2BD	Histone H2B type 1-D	0.620623	0.348225	1.78225	0.833697	2.76901e-11	9.4384e-11
A5A3E0	POTEF	POTE ankyrin domain family member F	1.09345	1.61938	0.675228	-0.566553	2.76901e-11	9.4384e-11
Q53TN4	CYBRD1	Cytochrome b reductase 1	1.45019	2.98263	0.486212	-1.04034	2.94025e-11	9.98176e-11
Q99879	HIST1H2BM	Histone H2B type 1-M	0.620623	0.350226	1.77206	0.825431	3.24896e-11	1.09581e-10
O75751	SLC22A3	Solute carrier family 22 member 3	0.643539	1.59741	0.402864	-1.31163	3.24896e-11	1.09581e-10
Q04756	HGFAC	Hepatocyte growth factor activator	1.07343	2.70769	0.396439	-1.33483	3.24896e-11	1.09581e-10
Q6P1K2	PMF1	Polyamine-modulated factor 1	1.07345	0.692425	1.55027	0.632521	3.38113e-11	1.13925e-10
Q9Y2I1	NISCH	Nischarin	0.969785	1.4369	0.674915	-0.567222	3.51856e-11	1.1832e-10
Q8WXH2	JPH3	Junctophilin-3	0.737974	1.70645	0.432461	-1.20936	3.66146e-11	1.23002e-10
Q9BRJ6	C7orf50	Uncharacterized protein C7orf50	0.41299	0.605875	0.681642	-0.552915	3.81003e-11	1.27739e-10
Q9Y314	NOSIP	Nitric oxide synthase-interacting protein	0.434708	0.302088	1.43901	0.525079	3.96449e-11	1.32588e-10
P36952	SERPINB5	Serpin B5	1.69653	0.753369	2.25192	1.17116	4.29202e-11	1.42694e-10
Q4V9L6	TMEM119	Transmembrane protein 119	1.89446	4.10699	0.461278	-1.11629	4.29202e-11	1.42694e-10
P62807	HIST1H2BC	Histone H2B type 1-C/E/F/G/I	0.620623	0.350226	1.77206	0.825431	4.83351e-11	1.59909e-10
Q8NCM8	DYNC2H1	Cytoplasmic dynein 2 heavy chain 1	0.43895	0.681079	0.644493	-0.633764	5.12877e-11	1.69345e-10
Q14019	COTL1	Coactosin-like protein	1.46338	1.01101	1.44744	0.533506	5.66053e-11	1.85812e-10
O60814	HIST1H2BK	Histone H2B type 1-K	0.620623	0.350226	1.77206	0.825431	5.88802e-11	1.92623e-10
P01906	HLA-DQA2	HLA class II histocompatibility antigen, DQ alpha 2 chain	2.15517	1.27339	1.69247	0.759129	6.12444e-11	2.00164e-10
O15551	CLDN3	Claudin-3	2.22671	1.36231	1.63451	0.708862	6.49657e-11	2.11609e-10
P15144	ANPEP	Aminopeptidase N	2.06745	3.45916	0.597672	-0.742573	6.62546e-11	2.15599e-10
P25815	S100P	Protein S100-P	2.86778	1.38497	2.07065	1.05008	6.89079e-11	2.23694e-10
P06899	HIST1H2BJ	Histone H2B type 1-J	0.686733	0.43756	1.56946	0.650269	6.89079e-11	2.23694e-10
P23527	HIST1H2BO	Histone H2B type 1-O	0.686733	0.43756	1.56946	0.650269	6.89079e-11	2.23694e-10
P33778	HIST1H2BB	Histone H2B type 1-B	0.686733	0.43756	1.56946	0.650269	6.89079e-11	2.23694e-10
Q16778	HIST2H2BE	Histone H2B type 2-E	0.686733	0.43756	1.56946	0.650269	6.89079e-11	2.23694e-10
Q8NEL9	DDHD1	Phospholipase DDHD1	0.492379	0.329607	1.49384	0.579025	7.02733e-11	2.27907e-10
P09467	FBP1	Fructose-1,6-bisphosphatase 1	3.47248	2.36471	1.46846	0.554306	7.30838e-11	2.36567e-10
P14902	IDO1	Indoleamine 2,3-dioxygenase 1	2.83774	1.63676	1.73375	0.793897	8.21912e-11	2.64904e-10
P29034	S100A2	Protein S100-A2	6.91464	2.63182	2.62733	1.3936	8.71521e-11	2.79957e-10
Q8WW12	PCNP	PEST proteolytic signal-containing nuclear protein	0.094964	0.144179	0.658653	-0.602409	9.24053e-11	2.96127e-10
P50225	SULT1A1	Sulfotransferase 1A1	1.59823	2.3996	0.66604	-0.586319	9.42243e-11	3.0167e-10
P50226	SULT1A2	Sulfotransferase 1A2	1.59823	2.3996	0.66604	-0.586319	9.42243e-11	3.0167e-10
P15941	MUC1	Mucin-1	2.03641	1.20758	1.68636	0.753911	9.98937e-11	3.17861e-10
Q13733	ATP1A4	Sodium/potassium-transporting ATPase subunit alpha-4	1.01449	2.54361	0.39884	-1.32612	9.98937e-11	3.17861e-10
Q5VXH4	PRAMEF6	PRAME family member 6	1.91151	1.21623	1.57166	0.652289	1.28562e-10	4.04696e-10
Q9H3D4	TP63	Tumor protein 63	2.59031	1.74264	1.48643	0.571851	1.31074e-10	4.1241e-10
Q8IZV5	RDH10	Retinol dehydrogenase 10	2.61169	1.47323	1.77276	0.826001	1.33634e-10	4.20072e-10
O60711	LPXN	Leupaxin	4.05885	2.46961	1.64352	0.71679	1.4161e-10	4.43697e-10
O76062	TM7SF2	Delta(14)-sterol reductase TM7SF2	0.865564	1.50243	0.57611	-0.795584	1.52971e-10	4.77744e-10
P02462	COL4A1	Collagen alpha-1(IV) chain	1.206	1.80138	0.669487	-0.578871	1.62073e-10	5.02909e-10
P29400	COL4A5	Collagen alpha-5(IV) chain	1.206	1.80138	0.669487	-0.578871	1.62073e-10	5.02909e-10
P04839	CYBB	Cytochrome b-245 heavy chain	5.54839	3.32159	1.6704	0.740197	1.75034e-10	5.40892e-10
A0A0B4J1V6	IGHV3-73	Immunoglobulin heavy variable 3-73	2.45968	7.27158	0.338259	-1.5638	1.7843e-10	5.5088e-10
Q687X5	STEAP4	Metalloreductase STEAP4	2.03142	4.38232	0.46355	-1.1092	1.85415e-10	5.71661e-10
P08253	MMP2	72 kDa type IV collagenase	3.14046	4.89997	0.640915	-0.641796	1.96397e-10	6.03314e-10
Q9Y623	MYH4	Myosin-4	1.08168	1.75093	0.617775	-0.694846	2.12032e-10	6.49865e-10
C9J798	RASA4B	Ras GTPase-activating protein 4B	1.06921	1.93867	0.551514	-0.85853	2.2455e-10	6.86051e-10
P46937	YAP1	Transcriptional coactivator YAP1	0.696141	0.991934	0.701801	-0.510866	2.51789e-10	7.64771e-10
Q86UL8	MAGI2	Membrane-associated guanylate kinase, WW and PDZ domain-containing protein 2	0.696141	0.991934	0.701801	-0.510866	2.51789e-10	7.64771e-10
Q5VT79	ANXA8L1	Annexin A8-like protein 1	1.79124	0.915225	1.95716	0.96876	2.56632e-10	7.78781e-10
Q29865	HLA-C	HLA class I histocompatibility antigen, Cw-18 alpha chain	1.67182	1.15013	1.4536	0.539629	2.82246e-10	8.51913e-10
Q8TBN0	RAB3IL1	Guanine nucleotide exchange factor for Rab-3A	1.47463	3.82954	0.385066	-1.37682	2.82246e-10	8.51913e-10
Q8WVM0	TFB1M	Dimethyladenosine transferase 1, mitochondrial	0.403092	0.280688	1.43609	0.522141	3.04519e-10	9.17091e-10
Q9H1H9	KIF13A	Kinesin-like protein KIF13A	0.859996	1.27465	0.674695	-0.567693	3.16291e-10	9.50845e-10
Q9BQ75	CMSS1	Protein CMSS1	0.384238	0.255122	1.5061	0.590814	3.22342e-10	9.68174e-10
O60234	GMFG	Glia maturation factor gamma	5.33997	3.64421	1.46533	0.551223	3.28506e-10	9.84497e-10
Q53G44	IFI44L	Interferon-induced protein 44-like	2.04954	1.38894	1.47562	0.561321	3.34785e-10	1.00287e-09
Q13491	GPM6B	Neuronal membrane glycoprotein M6-b	0.427002	1.29066	0.330839	-1.5958	3.47697e-10	1.0397e-09
P62841	RPS15	40S ribosomal protein S15	0.368639	0.221099	1.6673	0.737515	3.67982e-10	1.0989e-09
P34913	EPHX2	Bifunctional epoxide hydrolase 2	2.30441	3.33228	0.691541	-0.532112	4.04384e-10	1.20388e-09
O15394	NCAM2	Neural cell adhesion molecule 2	1.11806	2.9305	0.381523	-1.39016	4.36015e-10	1.29519e-09
P01903	HLA-DRA	HLA class II histocompatibility antigen, DR alpha chain	7.29234	4.24973	1.71596	0.779013	4.44293e-10	1.31804e-09
Q15555	MAPRE2	Microtubule-associated protein RP/EB family member 2	0.6819	0.985463	0.69196	-0.53124	4.78965e-10	1.4184e-09
P01701	IGLV1-51	Immunoglobulin lambda variable 1-51	1.31387	3.95479	0.332221	-1.58978	4.97278e-10	1.4707e-09
Q9UIS9	MBD1	Methyl-CpG-binding domain protein 1	0.658115	0.454046	1.44945	0.535501	5.35976e-10	1.57754e-09
Q14678	KANK1	KN motif and ankyrin repeat domain-containing protein 1	0.932918	1.38954	0.671388	-0.574782	5.46101e-10	1.60594e-09
O43374	RASA4	Ras GTPase-activating protein 4	1.06921	1.93867	0.551514	-0.85853	5.66913e-10	1.6628e-09
P15428	HPGD	15-hydroxyprostaglandin dehydrogenase [NAD(+)]	1.48679	2.78239	0.534357	-0.904124	5.66913e-10	1.6628e-09
P50993	ATP1A2	Sodium/potassium-transporting ATPase subunit alpha-2	1.01449	2.54361	0.39884	-1.32612	5.66913e-10	1.6628e-09
P0C0S5	H2AFZ	Histone H2A.Z	0.310673	0.191765	1.62007	0.696057	5.88499e-10	1.72386e-09
P32456	GBP2	Guanylate-binding protein 2	3.33243	2.09096	1.59373	0.672411	6.5818e-10	1.91881e-09
P49917	LIG4	DNA ligase 4	0.72891	0.500046	1.45769	0.543679	6.95976e-10	2.02463e-09
Q9H6Q3	SLA2	Src-like-adapter 2	4.05335	2.63477	1.53841	0.621438	7.78028e-10	2.2459e-09
Q96PE1	ADGRA2	Adhesion G protein-coupled receptor A2	1.27657	2.24884	0.56766	-0.8169	7.78028e-10	2.2459e-09
Q6DRA6	HIST2H2BD	Putative histone H2B type 2-D	0.67295	0.430746	1.56229	0.643661	8.69488e-10	2.49391e-09
Q96GX5	MASTL	Serine/threonine-protein kinase greatwall	0.369039	0.254867	1.44797	0.534028	9.53643e-10	2.72372e-09
A0A075B6J9	IGLV2-18	Immunoglobulin lambda variable 2-18	1.33812	3.47916	0.384609	-1.37854	9.89485e-10	2.82369e-09
A3QJZ7	PRAMEF27	PRAME family member 27	1.91151	1.21623	1.57166	0.652289	1.0079e-09	2.87259e-09
Q71UI9	H2AFV	Histone H2A.V	0.310673	0.19229	1.61564	0.692109	1.14645e-09	3.25374e-09
P09488	GSTM1	Glutathione S-transferase Mu 1	0.59492	0.980591	0.606695	-0.720956	1.14645e-09	3.25374e-09
Q9UBC9	SPRR3	Small proline-rich protein 3	1.38917	3.74912	0.370531	-1.43233	1.27986e-09	3.6217e-09
O15327	INPP4B	Inositol polyphosphate 4-phosphatase type II	1.56911	2.31609	0.677482	-0.561745	1.48148e-09	4.16605e-09
Q9H159	CDH19	Cadherin-19	0.625084	1.20337	0.519444	-0.944961	1.53654e-09	4.31548e-09
P23470	PTPRG	Receptor-type tyrosine-protein phosphatase gamma	1.30912	2.0521	0.637939	-0.648509	1.6527e-09	4.62058e-09
P02042	HBD	Hemoglobin subunit delta	8.83249	16.1704	0.546214	-0.872461	1.68305e-09	4.70154e-09
P16671	CD36	Platelet glycoprotein 4	1.27228	2.30775	0.551307	-0.859071	1.71395e-09	4.78388e-09
Q9Y680	FKBP7	Peptidyl-prolyl cis-trans isomerase FKBP7	1.4286	2.09796	0.680943	-0.554394	1.80998e-09	5.03319e-09
Q96P11	NSUN5	Probable 28S rRNA (cytosine-C(5))-methyltransferase	0.577446	0.405896	1.42265	0.508577	1.84314e-09	5.12119e-09
P08631	HCK	Tyrosine-protein kinase HCK	4.05335	2.63477	1.53841	0.621438	1.91125e-09	5.3017e-09
O60890	OPHN1	Oligophrenin-1	1.32794	2.24834	0.590631	-0.759671	2.09243e-09	5.78053e-09
P0DP01	IGHV1-8	Immunoglobulin heavy variable 1-8	1.18833	2.6135	0.45469	-1.13704	2.50636e-09	6.86223e-09
Q6ZMP0	THSD4	Thrombospondin type-1 domain-containing protein 4	1.97271	3.46725	0.568956	-0.813612	2.55189e-09	6.97275e-09
Q9BRK3	MXRA8	Matrix remodeling-associated protein 8	1.292	1.94023	0.665898	-0.586626	2.64538e-09	7.20779e-09
Q8TB22	SPATA20	Spermatogenesis-associated protein 20	1.24923	1.80793	0.690975	-0.533295	2.79191e-09	7.58865e-09
Q5VWM5	PRAMEF9	PRAME family member 9/15	1.91151	1.21623	1.57166	0.652289	2.84249e-09	7.72301e-09
Q9UFH2	DNAH17	Dynein heavy chain 17, axonemal	0.983383	0.573584	1.71445	0.777748	2.89396e-09	7.85968e-09
Q86UD1	OAF	Out at first protein homolog	1.08709	1.81667	0.598395	-0.740829	3.28052e-09	8.85963e-09
P13928	ANXA8	Annexin A8	2.75436	1.16897	2.35624	1.23648	3.3999e-09	9.17104e-09
Q8WXF7	ATL1	Atlastin-1	1.35959	2.09838	0.647925	-0.626102	3.58695e-09	9.6294e-09
Q9C0I4	THSD7B	Thrombospondin type-1 domain-containing protein 7B	0.858408	2.51679	0.341072	-1.55185	3.6515e-09	9.78711e-09
Q9NRF9	POLE3	DNA polymerase epsilon subunit 3	1.01989	1.51082	0.675055	-0.566923	3.71717e-09	9.95919e-09
A0A075B6H9	IGLV4-69	Immunoglobulin lambda variable 4-69	1.619	5.99997	0.269835	-1.88985	3.852e-09	1.03e-08
P01700	IGLV1-47	Immunoglobulin lambda variable 1-47	0.940452	1.93074	0.487094	-1.03773	4.13607e-09	1.10203e-08
Q92623	TTC9	Tetratricopeptide repeat protein 9A	1.33644	0.92964	1.43759	0.523649	5.30007e-09	1.39891e-08
A0A075B6K0	IGLV3-16	Immunoglobulin lambda variable 3-16	1.02444	1.92386	0.532493	-0.909166	5.39445e-09	1.42215e-08
P68871	HBB	Hemoglobin subunit beta	2.529	4.07009	0.621361	-0.686496	5.58812e-09	1.47091e-08
Q96J84	KIRREL1	Kin of IRRE-like protein 1	1.0228	1.56823	0.652203	-0.616608	5.68748e-09	1.49415e-08
P00750	PLAT	Tissue-type plasminogen activator	1.40852	2.61701	0.538217	-0.89374	5.68748e-09	1.49415e-08
O00533	CHL1	Neural cell adhesion molecule L1-like protein	1.07967	2.53091	0.426593	-1.22907	6.21062e-09	1.624e-08
P11597	CETP	Cholesteryl ester transfer protein	1.40604	2.26763	0.620048	-0.689549	6.32072e-09	1.65087e-08
Q5T200	ZC3H13	Zinc finger CCCH domain-containing protein 13	0.614471	0.41123	1.49423	0.579401	6.78044e-09	1.76548e-08
Q9HBI1	PARVB	Beta-parvin	0.524771	0.794075	0.660858	-0.597587	7.14641e-09	1.85647e-08
P80297	MT1X	Metallothionein-1X	0.914302	0.552445	1.65501	0.726839	7.79946e-09	2.0199e-08
A6NGN4	PRAMEF25	PRAME family member 25	1.91151	1.21623	1.57166	0.652289	8.21877e-09	2.11873e-08
P26022	PTX3	Pentraxin-related protein PTX3	2.59468	4.97033	0.522034	-0.937786	8.65996e-09	2.22228e-08
Q9Y2W1	THRAP3	Thyroid hormone receptor-associated protein 3	0.357859	0.232145	1.54153	0.624363	8.81208e-09	2.25874e-08
P41218	MNDA	Myeloid cell nuclear differentiation antigen	3.71956	2.42883	1.53142	0.614874	9.12414e-09	2.33784e-08
Q14677	CLINT1	Clathrin interactor 1	0.747099	0.511092	1.46177	0.547717	9.95204e-09	2.54322e-08
Q14191	WRN	Werner syndrome ATP-dependent helicase	2.07911	3.89334	0.534015	-0.905047	1.01262e-08	2.58478e-08
P47895	ALDH1A3	Aldehyde dehydrogenase family 1 member A3	1.57731	2.23128	0.706909	-0.500404	1.03033e-08	2.62601e-08
P30837	ALDH1B1	Aldehyde dehydrogenase X, mitochondrial	0.429752	0.642619	0.668751	-0.580459	1.03033e-08	2.62601e-08
O95428	PAPLN	Papilin	0.838106	1.88512	0.444591	-1.16945	1.03033e-08	2.62601e-08
P0DMM9	SULT1A3	Sulfotransferase 1A3	0.756664	1.21612	0.622197	-0.684556	1.08528e-08	2.75566e-08
Q8TAX9	GSDMB	Gasdermin-B	1.18751	0.685025	1.73352	0.793705	1.10422e-08	2.8006e-08
Q9NQW6	ANLN	Anillin	0.391019	0.26999	1.44827	0.534334	1.10422e-08	2.8006e-08
Q9P291	ARMCX1	Armadillo repeat-containing X-linked protein 1	1.40161	2.22398	0.630228	-0.666054	1.12348e-08	2.84731e-08
Q9NVH6	TMLHE	Trimethyllysine dioxygenase, mitochondrial	0.927362	1.34996	0.686953	-0.541716	1.2898e-08	3.2566e-08
Q6ZMR5	TMPRSS11A	Transmembrane protease serine 11A	1.22565	2.53333	0.48381	-1.04749	1.31221e-08	3.31068e-08
H0Y7S4	PRAMEF26	Putative PRAME family member 26	1.91151	1.21623	1.57166	0.652289	1.33499e-08	3.36313e-08
O60813	PRAMEF11	PRAME family member 11	1.91151	1.21623	1.57166	0.652289	1.33499e-08	3.36313e-08
Q96FZ5	CMTM7	CKLF-like MARVEL transmembrane domain-containing protein 7	0.909986	1.44085	0.631561	-0.663006	1.33499e-08	3.36313e-08
P42773	CDKN2C	Cyclin-dependent kinase 4 inhibitor C	0.447667	0.741246	0.603939	-0.727526	1.35815e-08	3.41765e-08
Q75T13	PGAP1	GPI inositol-deacylase	0.978212	1.4464	0.676306	-0.564252	1.3817e-08	3.47175e-08
P42167	TMPO	Lamina-associated polypeptide 2, isoforms beta/gamma	1.0057	0.687832	1.46213	0.548072	1.45477e-08	3.64584e-08
P28068	HLA-DMB	HLA class II histocompatibility antigen, DM beta chain	3.46787	2.20835	1.57034	0.651079	1.47995e-08	3.70344e-08
Q15582	TGFBI	Transforming growth factor-beta-induced protein ig-h3	2.79631	4.12762	0.677464	-0.561784	1.47995e-08	3.70344e-08
P01699	IGLV1-44	Immunoglobulin lambda variable 1-44	0.940452	1.93074	0.487094	-1.03773	1.55805e-08	3.89456e-08
O60810	PRAMEF4	PRAME family member 4	1.91151	1.21623	1.57166	0.652289	1.58497e-08	3.95743e-08
Q86X29	LSR	Lipolysis-stimulated lipoprotein receptor	0.66939	0.470396	1.42303	0.508971	1.61233e-08	4.02427e-08
Q9Y6Q2	STON1	Stonin-1	1.32903	2.07782	0.639631	-0.644689	1.69721e-08	4.22518e-08
Q6DN03	HIST2H2BC	Putative histone H2B type 2-C	0.67295	0.430746	1.56229	0.643661	1.8484e-08	4.58635e-08
Q9UGJ0	PRKAG2	5'-AMP-activated protein kinase subunit gamma-2	0.939486	1.45416	0.64607	-0.630238	2.04715e-08	5.04794e-08
Q9UL52	TMPRSS11E	Transmembrane protease serine 11E	1.30518	2.42521	0.538172	-0.89386	2.04715e-08	5.04794e-08
O00408	PDE2A	cGMP-dependent 3',5'-cyclic phosphodiesterase	0.639092	1.64142	0.389354	-1.36084	2.15415e-08	5.30211e-08
P43361	MAGEA8	Melanoma-associated antigen 8	0.0551345	0.080387	0.685863	-0.544007	2.19101e-08	5.3889e-08
P60903	S100A10	Protein S100-A10	1.33168	2.01571	0.660651	-0.59804	2.46673e-08	6.03624e-08
P05107	ITGB2	Integrin beta-2	4.34816	2.97011	1.46397	0.549886	2.59494e-08	6.3362e-08
P48061	CXCL12	Stromal cell-derived factor 1	0.783191	1.26172	0.620734	-0.687953	2.68399e-08	6.53943e-08
P25101	EDNRA	Endothelin-1 receptor	2.25832	5.00789	0.450953	-1.14895	2.68399e-08	6.53943e-08
Q9UPZ6	THSD7A	Thrombospondin type-1 domain-containing protein 7A	0.858408	2.51679	0.341072	-1.55185	3.07075e-08	7.43613e-08
P19878	NCF2	Neutrophil cytosol factor 2	2.93496	2.05971	1.42493	0.510894	3.39578e-08	8.17628e-08
P08519	LPA	Apolipoprotein(a)	0.752405	1.44911	0.51922	-0.945582	4.01302e-08	9.594e-08
P33402	GUCY1A2	Guanylate cyclase soluble subunit alpha-2	1.21207	2.11329	0.573546	-0.80202	4.08041e-08	9.75167e-08
O75452	RDH16	Retinol dehydrogenase 16	1.20418	1.76922	0.680625	-0.555068	4.21851e-08	1.00568e-07
Q86TV6	TTC7B	Tetratricopeptide repeat protein 7B	1.21173	1.92973	0.627926	-0.671333	4.21851e-08	1.00568e-07
Q9UI08	EVL	Ena/VASP-like protein	4.61674	3.08226	1.49784	0.582887	4.50844e-08	1.0729e-07
P18827	SDC1	Syndecan-1	3.19957	1.97576	1.61941	0.695469	4.89809e-08	1.16194e-07
Q9BY67	CADM1	Cell adhesion molecule 1	0.989467	1.78011	0.555846	-0.847244	5.06293e-08	1.19894e-07
Q13835	PKP1	Plakophilin-1	3.66636	2.11459	1.73384	0.793969	5.68328e-08	1.336e-07
Q7L311	ARMCX2	Armadillo repeat-containing X-linked protein 2	0.816466	1.35396	0.603021	-0.72972	5.68328e-08	1.336e-07
P18054	ALOX12	Arachidonate 12-lipoxygenase, 12S-type	1.25349	2.26003	0.554636	-0.850386	6.07019e-08	1.42348e-07
O15229	KMO	Kynurenine 3-monooxygenase	1.23708	2.16766	0.570697	-0.809204	6.2731e-08	1.46953e-07
P08311	CTSG	Cathepsin G	1.7481	2.84417	0.614625	-0.702223	7.51208e-08	1.74104e-07
P0DOX4	nan	Immunoglobulin epsilon heavy chain	2.08908	5.59661	0.373276	-1.42169	7.51208e-08	1.74104e-07
P22891	PROZ	Vitamin K-dependent protein Z	1.12452	2.92627	0.384284	-1.37976	7.76149e-08	1.79392e-07
P13647	KRT5	Keratin, type II cytoskeletal 5	4.12134	2.29481	1.79594	0.844737	8.15071e-08	1.87744e-07
P28907	CD38	ADP-ribosyl cyclase/cyclic ADP-ribose hydrolase 1	2.90475	2.02115	1.43717	0.523234	8.84177e-08	2.03039e-07
Q13823	GNL2	Nucleolar GTP-binding protein 2	0.47835	0.335386	1.42627	0.512246	8.98663e-08	2.06295e-07
Q96I76	GPATCH3	G patch domain-containing protein 3	1.17259	1.70369	0.688266	-0.538962	9.28328e-08	2.12527e-07
Q96BF6	NACC2	Nucleus accumbens-associated protein 2	0.397725	0.280531	1.41776	0.503609	9.90528e-08	2.26076e-07
Q6ZW31	SYDE1	Rho GTPase-activating protein SYDE1	0.549404	0.885749	0.620271	-0.68903	1.05675e-07	2.40136e-07
Q8WXI7	MUC16	Mucin-16	0.704697	0.250323	2.81515	1.49321	1.16419e-07	2.63486e-07
Q96DC8	ECHDC3	Enoyl-CoA hydratase domain-containing protein 3, mitochondrial	1.35319	2.1184	0.638778	-0.646613	1.24161e-07	2.80162e-07
Q5U651	RASIP1	Ras-interacting protein 1	0.880765	1.26956	0.693754	-0.527504	1.324e-07	2.98055e-07
Q9ULL4	PLXNB3	Plexin-B3	0.979089	1.38825	0.705266	-0.503761	1.43445e-07	3.21418e-07
Q5T0W9	FAM83B	Protein FAM83B	1.71883	1.11613	1.53999	0.622921	1.52917e-07	3.41735e-07
Q15772	SPEG	Striated muscle preferentially expressed protein kinase	0.699068	2.17806	0.320959	-1.63954	1.55378e-07	3.4712e-07
Q92597	NDRG1	Protein NDRG1	3.18764	2.19404	1.45286	0.538898	1.79321e-07	3.99022e-07
Q8WUD4	CCDC12	Coiled-coil domain-containing protein 12	0.425421	0.29254	1.45423	0.540258	1.82191e-07	4.0501e-07
Q15147	PLCB4	1-phosphatidylinositol 4,5-bisphosphate phosphodiesterase beta-4	0.428225	1.27952	0.334677	-1.57916	1.97224e-07	4.36271e-07
Q5TYX0	PRAMEF5	PRAME family member 5	1.91151	1.21623	1.57166	0.652289	2.30967e-07	5.07916e-07
Q7Z7A4	PXK	PX domain-containing protein kinase-like protein	1.17259	1.70369	0.688266	-0.538962	2.53822e-07	5.56544e-07
O43157	PLXNB1	Plexin-B1	0.979089	1.38825	0.705266	-0.503761	2.83252e-07	6.18062e-07
Q16585	SGCB	Beta-sarcoglycan	0.849103	2.22041	0.382408	-1.38681	3.01521e-07	6.56228e-07
P27635	RPL10	60S ribosomal protein L10	0.252708	0.165125	1.5304	0.613909	3.52309e-07	7.60632e-07
Q96L21	RPL10L	60S ribosomal protein L10-like	0.252708	0.165125	1.5304	0.613909	3.52309e-07	7.60632e-07
P54108	CRISP3	Cysteine-rich secretory protein 3	1.03153	3.13665	0.328863	-1.60444	3.69092e-07	7.94832e-07
P01718	IGLV3-27	Immunoglobulin lambda variable 3-27	1.12163	2.05724	0.545211	-0.875114	3.74856e-07	8.05702e-07
P08514	ITGA2B	Integrin alpha-IIb	1.75847	3.02813	0.58071	-0.78411	3.92674e-07	8.41854e-07
Q6NY19	KANK3	KN motif and ankyrin repeat domain-containing protein 3	1.33426	2.95201	0.451985	-1.14565	3.92674e-07	8.41854e-07
P31146	CORO1A	Coronin-1A	3.99505	2.63201	1.51787	0.602047	4.30793e-07	9.20361e-07
Q13123	IK	Protein Red	0.413556	0.273588	1.5116	0.596074	4.58163e-07	9.75439e-07
P05160	F13B	Coagulation factor XIII B chain	1.09953	2.24099	0.490645	-1.02725	4.79784e-07	1.01826e-06
P80108	GPLD1	Phosphatidylinositol-glycan-specific phospholipase D	1.03277	1.87197	0.551702	-0.858039	5.34127e-07	1.12968e-06
Q14938	NFIX	Nuclear factor 1 X-type	1.29334	2.01025	0.643373	-0.636272	5.42359e-07	1.14638e-06
O75487	GPC4	Glypican-4	1.2208	1.96111	0.622505	-0.683843	6.22164e-07	1.30769e-06
P29373	CRABP2	Cellular retinoic acid-binding protein 2	2.17711	3.50928	0.620388	-0.688758	6.317e-07	1.3269e-06
Q92918	MAP4K1	Mitogen-activated protein kinase kinase kinase kinase 1	0.972381	1.56636	0.620789	-0.687826	6.51196e-07	1.36701e-06
Q15629	TRAM1	Translocating chain-associated membrane protein 1	1.14683	0.787318	1.45662	0.542628	6.61161e-07	1.38663e-06
P49747	COMP	Cartilage oligomeric matrix protein	1.88602	3.00164	0.628329	-0.670408	7.46341e-07	1.55273e-06
P08779	KRT16	Keratin, type I cytoskeletal 16	2.77966	1.82259	1.52512	0.608922	9.9312e-07	2.04846e-06
Q14517	FAT1	Protocadherin Fat 1	0.805788	0.52674	1.52977	0.61331	1.00808e-06	2.07425e-06
Q92633	LPAR1	Lysophosphatidic acid receptor 1	0.421599	0.750014	0.562121	-0.831046	1.1025e-06	2.2582e-06
Q9C040	TRIM2	Tripartite motif-containing protein 2	0.963259	1.56113	0.617028	-0.696592	1.15285e-06	2.35632e-06
P06731	CEACAM5	Carcinoembryonic antigen-related cell adhesion molecule 5	4.87189	2.8106	1.7334	0.793601	1.27907e-06	2.60328e-06
Q14574	DSC3	Desmocollin-3	3.07452	1.92784	1.5948	0.673375	1.61945e-06	3.27431e-06
Q9H977	WDR54	WD repeat-containing protein 54	0.330335	0.233223	1.41639	0.502223	1.61945e-06	3.27431e-06
A0A0A0MT36	IGKV6D-21	Immunoglobulin kappa variable 6D-21	0.745278	2.78783	0.267332	-1.90329	1.84756e-06	3.71881e-06
Q9UKX2	MYH2	Myosin-2	0.914151	1.64993	0.554055	-0.851898	1.98731e-06	3.98466e-06
Q9BQI9	NRIP2	Nuclear receptor-interacting protein 2	1.14587	2.05988	0.556279	-0.846118	2.16845e-06	4.34011e-06
A0A0J9YX35	IGHV3-64D	Immunoglobulin heavy variable 3-64D	1.67021	2.67876	0.623501	-0.681536	2.20014e-06	4.40093e-06
Q3SY84	KRT71	Keratin, type II cytoskeletal 71	1.0686	1.95617	0.546272	-0.872308	2.57942e-06	5.13374e-06
Q8N139	ABCA6	ATP-binding cassette sub-family A member 6	1.27368	2.67843	0.475532	-1.07239	2.85265e-06	5.64591e-06
A1A4S6	ARHGAP10	Rho GTPase-activating protein 10	0.920084	1.46018	0.630116	-0.666311	2.97807e-06	5.8769e-06
P20226	TBP	TATA-box-binding protein	0.630224	0.436545	1.44366	0.529735	3.58534e-06	7.02393e-06
Q14210	LY6D	Lymphocyte antigen 6D	4.77277	3.02937	1.5755	0.655806	3.9041e-06	7.62407e-06
P11166	SLC2A1	Solute carrier family 2, facilitated glucose transporter member 1	1.71296	1.05976	1.61637	0.692754	4.24993e-06	8.26593e-06
P19013	KRT4	Keratin, type II cytoskeletal 4	0.78896	1.3357	0.590673	-0.759568	4.24993e-06	8.26593e-06
Q9H0H5	RACGAP1	Rac GTPase-activating protein 1	0.318359	0.218265	1.45859	0.544573	4.56037e-06	8.83154e-06
O75147	OBSL1	Obscurin-like protein 1	0.90396	1.37028	0.65969	-0.600141	5.03168e-06	9.69421e-06
Q7Z5N4	SDK1	Protein sidekick-1	1.30113	2.29346	0.56732	-0.817766	5.7065e-06	1.09475e-05
P16444	DPEP1	Dipeptidase 1	1.30256	2.05043	0.635262	-0.654576	5.8678e-06	1.12441e-05
Q9Y6R7	FCGBP	IgGFc-binding protein	1.3841	2.19161	0.631544	-0.663045	6.46745e-06	1.23441e-05
Q6ZVM7	TOM1L2	TOM1-like protein 2	0.609632	0.874702	0.696959	-0.520854	6.83598e-06	1.29961e-05
Q9BYX7	POTEKP	Putative beta-actin-like protein 3	1.04766	1.48253	0.706673	-0.500885	7.42666e-06	1.40952e-05
Q6SJ96	TBPL2	TATA box-binding protein-like protein 2	0.630224	0.436545	1.44366	0.529735	7.52974e-06	1.42828e-05
O94885	SASH1	SAM and SH3 domain-containing protein 1	0.381839	1.46796	0.260115	-1.94278	7.95589e-06	1.50573e-05
Q9HCY8	S100A14	Protein S100-A14	4.26974	2.99652	1.4249	0.510861	9.76858e-06	1.83797e-05
Q6SZW1	SARM1	Sterile alpha and TIR motif-containing protein 1	0.912339	1.34467	0.678487	-0.559607	1.03149e-05	1.93591e-05
P47929	LGALS7	Galectin-7	2.85235	1.9678	1.44951	0.53557	1.13419e-05	2.11982e-05
P29762	CRABP1	Cellular retinoic acid-binding protein 1	1.56234	4.39308	0.355636	-1.49153	1.28063e-05	2.38231e-05
Q02161	RHD	Blood group Rh(D) polypeptide	0.882657	1.29258	0.682866	-0.550326	1.50414e-05	2.78122e-05
P29474	NOS3	Nitric oxide synthase, endothelial	1.08128	1.67155	0.646877	-0.628437	1.67331e-05	3.08304e-05
P49789	FHIT	Bis(5'-adenosyl)-triphosphatase	0.823561	1.32835	0.619988	-0.689689	1.74131e-05	3.20133e-05
A0A075B6K5	IGLV3-9	Immunoglobulin lambda variable 3-9	0.958465	1.52417	0.628842	-0.669231	2.17915e-05	3.96097e-05
P35900	KRT20	Keratin, type I cytoskeletal 20	1.96293	3.42194	0.573632	-0.801803	2.26657e-05	4.11322e-05
P08183	ABCB1	ATP-dependent translocase ABCB1	0.703627	1.13767	0.618481	-0.693199	2.35732e-05	4.27102e-05
A8K2U0	A2ML1	Alpha-2-macroglobulin-like protein 1	2.19704	3.49237	0.629098	-0.668643	2.51631e-05	4.54565e-05
Q9H6L2	TMEM231	Transmembrane protein 231	1.04771	1.90002	0.551421	-0.858774	2.58271e-05	4.65937e-05
Q9BXF6	RAB11FIP5	Rab11 family-interacting protein 5	0.765351	1.12104	0.682718	-0.550639	2.86538e-05	5.15006e-05
Q9UGK3	STAP2	Signal-transducing adaptor protein 2	1.52499	1.04859	1.45432	0.540347	2.90272e-05	5.21161e-05
P16403	HIST1H1C	Histone H1.2	0.0827355	0.161199	0.513251	-0.962265	3.17731e-05	5.68797e-05
O95833	CLIC3	Chloride intracellular channel protein 3	1.08095	1.55726	0.694138	-0.526705	3.30239e-05	5.90406e-05
P32926	DSG3	Desmoglein-3	4.37774	2.62054	1.67055	0.740321	3.38836e-05	6.04336e-05
O60760	HPGDS	Hematopoietic prostaglandin D synthase	1.35872	2.51248	0.54079	-0.886859	3.70632e-05	6.58955e-05
Q9GZM7	TINAGL1	Tubulointerstitial nephritis antigen-like	2.26506	3.29676	0.687057	-0.541499	4.05246e-05	7.17284e-05
P80748	IGLV3-21	Immunoglobulin lambda variable 3-21	0.958465	1.52417	0.628842	-0.669231	4.65905e-05	8.19279e-05
Q4L180	FILIP1L	Filamin A-interacting protein 1-like	1.59552	2.26459	0.70455	-0.505226	5.08887e-05	8.92305e-05
P35612	ADD2	Beta-adducin	0.57926	0.97039	0.596935	-0.744353	5.48695e-05	9.60358e-05
P19086	GNAZ	Guanine nucleotide-binding protein G(z) subunit alpha	0.412734	0.682877	0.604404	-0.726416	5.5561e-05	9.72209e-05
Q5VU97	CACHD1	VWFA and cache domain-containing protein 1	1.00045	1.41817	0.705454	-0.503376	6.69768e-05	0.000116442
P48594	SERPINB4	Serpin B4	4.13328	2.43192	1.69959	0.765187	7.1252e-05	0.000123556
P22532	SPRR2D	Small proline-rich protein 2D	2.11437	3.13427	0.674595	-0.567907	0.000107933	0.000183394
P35325	SPRR2B	Small proline-rich protein 2B	2.11437	3.13427	0.674595	-0.567907	0.000107933	0.000183394
P01766	IGHV3-13	Immunoglobulin heavy variable 3-13	0.557639	0.812925	0.685966	-0.543791	0.00011057	0.00018759
P35326	SPRR2A	Small proline-rich protein 2A	1.8639	2.80376	0.664787	-0.589036	0.00011057	0.00018759
P05109	S100A8	Protein S100-A8	4.29815	2.98438	1.44022	0.526285	0.000140493	0.000236279
Q96RU2	USP28	Ubiquitin carboxyl-terminal hydrolase 28	0.824725	0.542112	1.52132	0.605323	0.0001738	0.000289267
Q8WU39	MZB1	Marginal zone B- and B1-cell-specific protein	4.48867	3.07837	1.45813	0.544124	0.0001738	0.000289267
Q6AZY7	SCARA3	Scavenger receptor class A member 3	0.434367	0.65967	0.65846	-0.602831	0.000204699	0.000338523
P01909	HLA-DQA1	HLA class II histocompatibility antigen, DQ alpha 1 chain	4.35403	2.8869	1.50821	0.592833	0.000227212	0.00037383
Q9Y625	GPC6	Glypican-6	1.06163	1.66322	0.638297	-0.6477	0.000237946	0.000390444
A0A087WSX0	IGLV5-45	Immunoglobulin lambda variable 5-45	1.2771	3.40359	0.375221	-1.41419	0.00024349	0.000398959
A0A0G2JS06	IGLV5-39	Immunoglobulin lambda variable 5-39	1.2771	3.40359	0.375221	-1.41419	0.000246307	0.000403477
P06401	PGR	Progesterone receptor	1.02547	2.09595	0.489264	-1.03132	0.00026997	0.000440422
P18577	RHCE	Blood group Rh(CE) polypeptide	0.882657	1.29258	0.682866	-0.550326	0.000292407	0.000475646
Q8N1G0	ZNF687	Zinc finger protein 687	0.739276	0.519388	1.42336	0.509301	0.000320184	0.000519203
Q9BZZ2	SIGLEC1	Sialoadhesin	1.45804	2.07082	0.704086	-0.506176	0.000320184	0.000519203
A8MUU1	FABP5P3	Putative fatty acid-binding protein 5-like protein 3	3.37807	1.97501	1.71041	0.774341	0.000331223	0.000535944
Q01469	FABP5	Fatty acid-binding protein 5	3.37807	1.97501	1.71041	0.774341	0.000331223	0.000535944
Q9UBX7	KLK11	Kallikrein-11	0.701502	1.23788	0.566695	-0.819355	0.000366514	0.000589937
Q96RW7	HMCN1	Hemicentin-1	1.03632	1.73009	0.598998	-0.739377	0.000396362	0.000636461
P07476	IVL	Involucrin	2.04061	3.29402	0.619489	-0.690849	0.000400807	0.000642834
O76076	WISP2	WNT1-inducible-signaling pathway protein 2	0.714896	1.32224	0.540671	-0.887178	0.000409836	0.00065638
O14494	PLPP1	Phospholipid phosphatase 1	1.42827	2.14531	0.665763	-0.586919	0.000551874	0.000874524
Q6ZNL6	FGD5	FYVE, RhoGEF and PH domain-containing protein 5	1.25074	1.93747	0.645552	-0.631395	0.000595556	0.000940212
Q9UBD6	RHCG	Ammonium transporter Rh type C	1.59601	2.97439	0.536583	-0.898127	0.000602052	0.000949358
Q8WUY3	PRUNE2	Protein prune homolog 2	0.602415	0.875464	0.68811	-0.53929	0.000642438	0.00101021
Q6KCM7	SLC25A25	Calcium-binding mitochondrial carrier protein SCaMC-2	0.924799	1.36927	0.675398	-0.566191	0.000678003	0.00106267
Q08188	TGM3	Protein-glutamine gamma-glutamyltransferase E	0.804213	1.26321	0.63664	-0.65145	0.000770959	0.00119972
A0A075B6K2	IGLV3-12	Immunoglobulin lambda variable 3-12	0.958465	1.52417	0.628842	-0.669231	0.000875634	0.00135325
P05129	PRKCG	Protein kinase C gamma type	1.28784	2.39851	0.536932	-0.897188	0.000875634	0.00135325
A0A0C4DH32	IGHV3-20	Immunoglobulin heavy variable 3-20	1.16164	2.09943	0.553312	-0.853834	0.000923019	0.00142128
P02745	C1QA	Complement C1q subcomponent subunit A	1.79501	2.84147	0.631721	-0.662641	0.000993357	0.00152506
O95760	IL33	Interleukin-33	1.38028	2.41835	0.570754	-0.809059	0.00106863	0.00163505
Q8NCF5	NFATC2IP	NFATC2-interacting protein	0.677098	0.477366	1.4184	0.504268	0.00123525	0.00188187
P35080	PFN2	Profilin-2	0.547956	0.911774	0.600978	-0.734615	0.00136861	0.00207847
Q9H8L6	MMRN2	Multimerin-2	0.972973	1.45571	0.668385	-0.581249	0.00138265	0.00209838
Q99969	RARRES2	Retinoic acid receptor responder protein 2	1.22713	1.86837	0.656795	-0.606485	0.00145487	0.00220156
Q9UJC5	SH3BGRL2	SH3 domain-binding glutamic acid-rich-like protein 2	0.406458	1.07001	0.379863	-1.39645	0.00176219	0.00263587
P10415	BCL2	Apoptosis regulator Bcl-2	1.48039	2.30196	0.643099	-0.636887	0.001871	0.00278996
Q96P63	SERPINB12	Serpin B12	1.09767	1.67479	0.655407	-0.609538	0.00192768	0.00287131
P51687	SUOX	Sulfite oxidase, mitochondrial	0.795528	1.12701	0.705872	-0.502521	0.00319676	0.00466082
Q9UKR3	KLK13	Kallikrein-13	0.565567	0.877686	0.644384	-0.634007	0.00386088	0.005563
O60331	PIP5K1C	Phosphatidylinositol 4-phosphate 5-kinase type-1 gamma	0.920646	1.68794	0.545427	-0.874541	0.00386088	0.005563
O95210	STBD1	Starch-binding domain-containing protein 1	0.408212	0.595132	0.68592	-0.543889	0.00400788	0.0057625
P05937	CALB1	Calbindin	0.902365	1.32952	0.678714	-0.559124	0.00464804	0.00662926
P27482	CALML3	Calmodulin-like protein 3	4.67803	3.11454	1.502	0.586883	0.00473426	0.00675079
P04350	TUBB4A	Tubulin beta-4A chain	0.419237	0.667806	0.627783	-0.671661	0.00528265	0.0074869

## Sheet: Table S4B
Table S4B. The list of 1,191 DPPs.
Protein accession	Gene name	Protein description	Tumor	NAT	FC	Log2 FC	P value	Adjust P
Q9UGM5	FETUB	Fetuin-B	2.6869	12.4962	0.215018	-2.21747	4.1e-20	1.17e-17
Q01484	ANK2	Ankyrin-2	1.19875	3.52872	0.339712	-1.55762	4.1e-20	1.17e-17
Q99536	VAT1	Synaptic vesicle membrane protein VAT-1 homolog	0.965471	2.65782	0.363257	-1.46094	4.1e-20	1.17e-17
P25205	MCM3	DNA replication licensing factor MCM3	1.34449	0.499021	2.69425	1.42988	4.1e-20	1.17e-17
P30050	RPL12	60S ribosomal protein L12	1.00292	0.204685	4.89981	2.29272	4.1e-20	1.17e-17
P01042	KNG1	Kininogen-1	2.25235	8.02509	0.280664	-1.83309	4.32e-20	1.17e-17
P08294	SOD3	Extracellular superoxide dismutase [Cu-Zn]	1.11532	9.60438	0.116127	-3.10623	4.44e-20	1.17e-17
P01008	SERPINC1	Antithrombin-III	1.98486	8.17417	0.24282	-2.04204	4.44e-20	1.17e-17
Q9HBL0	TNS1	Tensin-1	1.33599	2.75585	0.484782	-1.04459	4.56e-20	1.17e-17
P22105	TNXB	Tenascin-X	1.15659	3.69712	0.312836	-1.67652	4.69e-20	1.17e-17
P02765	AHSG	Alpha-2-HS-glycoprotein	1.35711	3.28439	0.4132	-1.27509	4.69e-20	1.17e-17
P13591	NCAM1	Neural cell adhesion molecule 1	1.09603	5.74154	0.190895	-2.38915	4.82e-20	1.17e-17
O14610	GNGT2	Guanine nucleotide-binding protein G(I)/G(S)/G(O) subunit gamma-T2	1.19875	3.07531	0.3898	-1.3592	4.82e-20	1.17e-17
Q63HR2	TNS2	Tensin-2	1.37872	3.33037	0.413982	-1.27236	4.95e-20	1.17e-17
Q96MM6	HSPA12B	Heat shock 70 kDa protein 12B	1.38931	3.48712	0.398411	-1.32767	5.08e-20	1.17e-17
Q03135	CAV1	Caveolin-1	1.32503	3.75862	0.35253	-1.50418	5.22e-20	1.17e-17
Q8N3T6	TMEM132C	Transmembrane protein 132C	1.60072	11.5353	0.138767	-2.84926	5.36e-20	1.17e-17
Q9NVM1	EVA1B	Protein eva-1 homolog B	1.46969	5.02268	0.292611	-1.77294	5.36e-20	1.17e-17
O14558	HSPB6	Heat shock protein beta-6	1.18934	4.44557	0.267534	-1.9022	5.51e-20	1.17e-17
Q02952	AKAP12	A-kinase anchor protein 12	0.912305	2.02444	0.450644	-1.14994	5.51e-20	1.17e-17
Q01118	SCN7A	Sodium channel protein type 7 subunit alpha	1.06407	4.05458	0.262436	-1.92997	5.66e-20	1.17e-17
P43121	MCAM	Cell surface glycoprotein MUC18	0.303553	0.714955	0.424577	-1.2359	5.66e-20	1.17e-17
P25189	MPZ	Myelin protein P0	1.33625	8.3411	0.160201	-2.64204	5.81e-20	1.17e-17
Q9UQ16	DNM3	Dynamin-3	1.26123	2.90337	0.434402	-1.2029	5.97e-20	1.17e-17
O75112	LDB3	LIM domain-binding protein 3	1.27506	2.34864	0.542895	-0.881256	6.47e-20	1.17e-17
Q16473	TNXA	Putative tenascin-XA	0.782109	2.01699	0.38776	-1.36676	6.65e-20	1.17e-17
Q00577	PURA	Transcriptional activator protein Pur-alpha	1.39744	3.59631	0.388577	-1.36373	6.65e-20	1.17e-17
Q9C0E8	LNPK	Endoplasmic reticulum junction formation protein lunapark	1.46779	2.35487	0.623302	-0.681997	7.01e-20	1.17e-17
Q07092	COL16A1	Collagen alpha-1(XVI) chain	1.46675	4.29979	0.341122	-1.55164	7.6e-20	1.17e-17
Q9HCU0	CD248	Endosialin	1.63756	4.5928	0.356549	-1.48783	7.81e-20	1.17e-17
Q9NS73	MBIP	MAP3K12-binding inhibitory protein 1	1.18656	0.406622	2.91808	1.54502	7.81e-20	1.17e-17
O43294	TGFB1I1	Transforming growth factor beta-1-induced transcript 1 protein	1.13111	4.11101	0.275142	-1.86175	8.02e-20	1.17e-17
Q96CX2	KCTD12	BTB/POZ domain-containing protein KCTD12	1.25099	2.0326	0.615461	-0.70026	8.02e-20	1.17e-17
O14791	APOL1	Apolipoprotein L1	1.3698	3.11365	0.439933	-1.18464	8.24e-20	1.17e-17
P07197	NEFM	Neurofilament medium polypeptide	1.35279	8.36572	0.161707	-2.62855	8.46e-20	1.17e-17
P19823	ITIH2	Inter-alpha-trypsin inhibitor heavy chain H2	3.29879	12.0427	0.273925	-1.86815	8.46e-20	1.17e-17
Q9H019	MTFR1L	Mitochondrial fission regulator 1-like	0.365845	0.638116	0.573321	-0.802586	8.93e-20	1.17e-17
P78559	MAP1A	Microtubule-associated protein 1A	1.00178	1.80445	0.555174	-0.848989	9.17e-20	1.17e-17
Q96PE1	ADGRA2	Adhesion G protein-coupled receptor A2	1.61516	3.63952	0.443784	-1.17207	9.42e-20	1.17e-17
Q9BZQ8	NIBAN1	Protein Niban 1	1.10911	1.80165	0.615608	-0.699916	9.42e-20	1.17e-17
P17480	UBTF	Nucleolar transcription factor 1	0.62037	0.184741	3.35805	1.74762	9.42e-20	1.17e-17
Q63ZY3	KANK2	KN motif and ankyrin repeat domain-containing protein 2	1.11647	2.58666	0.431627	-1.21214	9.67e-20	1.17e-17
Q969G5	CAVIN3	Caveolae-associated protein 3	1.09512	2.03509	0.538122	-0.893995	9.67e-20	1.17e-17
Q8N5J2	MINDY1	Ubiquitin carboxyl-terminal hydrolase MINDY-1	1.43225	2.53839	0.564236	-0.82563	1.05e-19	1.19e-17
O75400	PRPF40A	Pre-mRNA-processing factor 40 homolog A	1.59037	0.924175	1.72086	0.783126	1.05e-19	1.19e-17
P41252	IARS	Isoleucine--tRNA ligase, cytoplasmic	0.881917	0.458845	1.92203	0.942634	1.05e-19	1.19e-17
O15431	SLC31A1	High affinity copper uptake protein 1	2.26989	9.39243	0.241672	-2.04888	1.08e-19	1.19e-17
P35611	ADD1	Alpha-adducin	1.24848	2.10411	0.593355	-0.753033	1.13e-19	1.23e-17
Q96PX6	CCDC85A	Coiled-coil domain-containing protein 85A	1.37734	4.57139	0.301296	-1.73075	1.17e-19	1.24e-17
Q8WYQ5	DGCR8	Microprocessor complex subunit DGCR8	1.32369	0.900649	1.4697	0.555526	1.3e-19	1.35e-17
P14672	SLC2A4	Solute carrier family 2, facilitated glucose transporter member 4	0.878311	5.51457	0.159271	-2.65045	1.37e-19	1.37e-17
P08648	ITGA5	Integrin alpha-5	1.35524	3.68535	0.367737	-1.44325	1.37e-19	1.37e-17
C9J798	RASA4B	Ras GTPase-activating protein 4B	1.19385	2.69226	0.443437	-1.1732	1.44e-19	1.4e-17
Q8WUY3	PRUNE2	Protein prune homolog 2	0.385729	1.11264	0.346678	-1.52833	1.48e-19	1.4e-17
P29474	NOS3	Nitric oxide synthase, endothelial	1.35968	2.73556	0.497038	-1.00857	1.48e-19	1.4e-17
Q9Y534	CSDC2	Cold shock domain-containing protein C2	0.463517	2.03214	0.228092	-2.13231	1.6e-19	1.44e-17
O43374	RASA4	Ras GTPase-activating protein 4	1.19385	2.69226	0.443437	-1.1732	1.6e-19	1.44e-17
Q01196	RUNX1	Runt-related transcription factor 1	1.88164	1.00896	1.86494	0.899127	1.6e-19	1.44e-17
Q96K83	ZNF521	Zinc finger protein 521	1.6324	4.21461	0.387318	-1.36841	1.65e-19	1.46e-17
A6NCI8	C2orf78	Uncharacterized protein C2orf78	1.52792	8.98796	0.169996	-2.55643	1.69e-19	1.47e-17
P04114	APOB	Apolipoprotein B-100	2.68526	8.84762	0.303501	-1.72023	1.74e-19	1.48e-17
P05060	CHGB	Secretogranin-1	1.30317	4.59652	0.283511	-1.81852	1.78e-19	1.48e-17
P02545	LMNA	Prelamin-A/C	1.14625	1.84958	0.619734	-0.690279	1.78e-19	1.48e-17
P10275	AR	Androgen receptor	1.29509	3.53337	0.366529	-1.448	1.88e-19	1.51e-17
Q8NF91	SYNE1	Nesprin-1	1.06982	1.81434	0.589646	-0.762078	1.93e-19	1.53e-17
Q9H7M9	VSIR	V-type immunoglobulin domain-containing suppressor of T-cell activation	1.13397	2.23088	0.508306	-0.976231	1.98e-19	1.54e-17
P27361	MAPK3	Mitogen-activated protein kinase 3	1.19153	3.1481	0.378491	-1.40167	2.04e-19	1.56e-17
P21291	CSRP1	Cysteine and glycine-rich protein 1	0.832509	2.32204	0.358525	-1.47985	2.09e-19	1.58e-17
O60504	SORBS3	Vinexin	1.194	2.48962	0.47959	-1.06013	2.15e-19	1.6e-17
Q15746	MYLK	Myosin light chain kinase, smooth muscle	1.5138	6.00234	0.252202	-1.98735	2.2e-19	1.62e-17
P17661	DES	Desmin	1.36204	4.88136	0.279028	-1.84152	2.26e-19	1.62e-17
Q99719	SEPTIN5	Septin-5	1.40905	3.66455	0.384507	-1.37892	2.26e-19	1.62e-17
P35749	MYH11	Myosin-11	1.47545	5.89465	0.250303	-1.99825	2.45e-19	1.73e-17
Q6ZWB6	KCTD8	BTB/POZ domain-containing protein KCTD8	1.31479	2.85513	0.4605	-1.11873	2.52e-19	1.75e-17
Q6MZP7	LIN54	Protein lin-54 homolog	0.428045	0.230941	1.85348	0.890239	2.58e-19	1.77e-17
P02652	APOA2	Apolipoprotein A-II	1.35028	3.38002	0.399488	-1.32378	2.65e-19	1.8e-17
Q9UMS6	SYNPO2	Synaptopodin-2	1.36501	2.90877	0.469273	-1.0915	2.72e-19	1.82e-17
Q53TN4	CYBRD1	Cytochrome b reductase 1	1.37038	2.76133	0.496277	-1.01078	2.87e-19	1.9e-17
P56693	SOX10	Transcription factor SOX-10	1.59919	4.83885	0.330489	-1.59733	3.11e-19	1.98e-17
Q93074	MED12	Mediator of RNA polymerase II transcription subunit 12	1.17161	0.824786	1.42051	0.506406	3.11e-19	1.98e-17
Q9H6Y2	WDR55	WD repeat-containing protein 55	0.753633	0.433308	1.73925	0.798468	3.11e-19	1.98e-17
Q9BZD4	NUF2	Kinetochore protein Nuf2	0.803053	0.336907	2.38361	1.25315	3.19e-19	1.98e-17
Q53EZ4	CEP55	Centrosomal protein of 55 kDa	1.01604	0.407502	2.49335	1.31808	3.19e-19	1.98e-17
Q9HB96	FANCE	Fanconi anemia group E protein	0.852637	0.515472	1.65409	0.726036	3.27e-19	1.99e-17
Q16832	DDR2	Discoidin domain-containing receptor 2	1.43114	2.32285	0.616115	-0.698729	3.36e-19	2e-17
Q15124	PGM5	Phosphoglucomutase-like protein 5	1.12785	3.46804	0.325213	-1.62054	3.45e-19	2e-17
Q9BTV4	TMEM43	Transmembrane protein 43	1.45306	3.41542	0.425442	-1.23297	3.45e-19	2e-17
Q9NUP7	TRMT13	tRNA:m(4)X modification enzyme TRM13 homolog	1.24673	0.784208	1.58979	0.668841	3.45e-19	2e-17
P57081	WDR4	tRNA (guanine-N(7)-)-methyltransferase non-catalytic subunit WDR4	0.9016	0.399965	2.2542	1.17261	3.54e-19	2.03e-17
Q9UBI6	GNG12	Guanine nucleotide-binding protein G(I)/G(S)/G(O) subunit gamma-12	1.22324	2.38082	0.513791	-0.960746	3.74e-19	2.08e-17
P00747	PLG	Plasminogen	1.79453	3.98801	0.44998	-1.15207	3.83e-19	2.08e-17
P45985	MAP2K4	Dual specificity mitogen-activated protein kinase kinase 4	1.09267	1.84472	0.592324	-0.755541	3.83e-19	2.08e-17
O43598	DNPH1	2'-deoxynucleoside 5'-phosphate N-hydrolase 1	0.924647	1.46269	0.632155	-0.66165	3.83e-19	2.08e-17
O43583	DENR	Density-regulated protein	1.45526	0.791156	1.83941	0.879246	3.83e-19	2.08e-17
Q9C019	TRIM15	Tripartite motif-containing protein 15	1.56783	5.05995	0.309852	-1.69035	4.04e-19	2.15e-17
Q9BX66	SORBS1	Sorbin and SH3 domain-containing protein 1	1.1858	2.48028	0.478092	-1.06464	4.04e-19	2.15e-17
O75688	PPM1B	Protein phosphatase 1B	1.70104	5.85776	0.290391	-1.78393	4.15e-19	2.19e-17
Q9UN36	NDRG2	Protein NDRG2	1.3006	2.13235	0.609937	-0.713267	4.26e-19	2.22e-17
Q9ULC0	EMCN	Endomucin	1.01384	3.22891	0.313988	-1.67122	4.49e-19	2.3e-17
O15372	EIF3H	Eukaryotic translation initiation factor 3 subunit H	0.921258	0.532374	1.73047	0.791166	4.49e-19	2.3e-17
Q9H0H5	RACGAP1	Rac GTPase-activating protein 1	0.37198	0.18851	1.97326	0.980581	4.86e-19	2.46e-17
P09382	LGALS1	Galectin-1	1.05113	3.07985	0.341293	-1.55092	4.98e-19	2.48e-17
Q9UK55	SERPINA10	Protein Z-dependent protease inhibitor	1.78984	4.58048	0.390754	-1.35567	4.98e-19	2.48e-17
Q15131	CDK10	Cyclin-dependent kinase 10	1.49863	0.883118	1.69698	0.762965	5.12e-19	2.49e-17
Q9Y343	SNX24	Sorting nexin-24	1.56211	0.883859	1.76738	0.821608	5.12e-19	2.49e-17
Q14938	NFIX	Nuclear factor 1 X-type	1.26118	1.9724	0.639415	-0.645175	5.54e-19	2.63e-17
O75764	TCEA3	Transcription elongation factor A protein 3	1.14073	0.689472	1.6545	0.726394	5.54e-19	2.63e-17
Q92674	CENPI	Centromere protein I	1.23675	0.439046	2.8169	1.49411	5.54e-19	2.63e-17
P55285	CDH6	Cadherin-6	1.49045	3.12514	0.476923	-1.06817	5.83e-19	2.74e-17
Q8WVB6	CHTF18	Chromosome transmission fidelity protein 18 homolog	1.16644	0.605978	1.92488	0.94477	6.31e-19	2.94e-17
Q86VW2	ARHGEF25	Rho guanine nucleotide exchange factor 25	1.26497	2.53144	0.499703	-1.00086	6.47e-19	2.96e-17
Q05682	CALD1	Caldesmon	1.16676	3.30264	0.353281	-1.50111	6.65e-19	3.01e-17
Q8N6C5	IGSF1	Immunoglobulin superfamily member 1	0.352985	8.1127	0.0435102	-4.5225	6.82e-19	3.04e-17
P49736	MCM2	DNA replication licensing factor MCM2	0.85415	0.523039	1.63305	0.70757	6.82e-19	3.04e-17
Q15035	TRAM2	Translocating chain-associated membrane protein 2	0.457582	1.04966	0.435933	-1.19782	7e-19	3.07e-17
Q9UKL3	CASP8AP2	CASP8-associated protein 2	0.482853	0.244766	1.97271	0.980182	7e-19	3.07e-17
O15068	MCF2L	Guanine nucleotide exchange factor DBS	1.51601	2.337	0.648699	-0.624378	7.38e-19	3.18e-17
O15042	U2SURP	U2 snRNP-associated SURP motif-containing protein	0.900482	0.427893	2.10445	1.07345	7.38e-19	3.18e-17
Q9NVP2	ASF1B	Histone chaperone ASF1B	0.540397	0.240204	2.24975	1.16976	7.57e-19	3.24e-17
O75449	KATNA1	Katanin p60 ATPase-containing subunit A1	1.25077	0.736717	1.69776	0.763634	7.77e-19	3.3e-17
P50402	EMD	Emerin	0.435989	0.622264	0.70065	-0.513234	8.4e-19	3.54e-17
P49321	NASP	Nuclear autoantigenic sperm protein	1.11097	0.599031	1.85462	0.891123	8.85e-19	3.69e-17
P52630	STAT2	Signal transducer and activator of transcription 2	3.24817	1.52137	2.13503	1.09426	9.09e-19	3.76e-17
Q01105	SET	Protein SET	1.4335	0.854809	1.67698	0.745865	9.32e-19	3.83e-17
Q93052	LPP	Lipoma-preferred partner	1.2112	2.33846	0.517948	-0.94912	9.57e-19	3.88e-17
P08134	RHOC	Rho-related GTP-binding protein RhoC	1.26112	2.93178	0.430155	-1.21707	9.82e-19	3.88e-17
P43250	GRK6	G protein-coupled receptor kinase 6	0.513787	1.14357	0.449282	-1.15431	9.82e-19	3.88e-17
Q13542	EIF4EBP2	Eukaryotic translation initiation factor 4E-binding protein 2	0.489563	0.958265	0.510885	-0.968931	9.82e-19	3.88e-17
Q9NQU5	PAK6	Serine/threonine-protein kinase PAK 6	3.71099	1.41577	2.62118	1.39021	9.82e-19	3.88e-17
Q14515	SPARCL1	SPARC-like protein 1	1.52919	4.04902	0.377669	-1.40481	1.01e-18	3.95e-17
Q9NP66	HMG20A	High mobility group protein 20A	0.827456	0.533454	1.55113	0.633318	1.03e-18	4.03e-17
Q92930	RAB8B	Ras-related protein Rab-8B	1.28212	2.61512	0.490273	-1.02834	1.06e-18	4.1e-17
Q06124	PTPN11	Tyrosine-protein phosphatase non-receptor type 11	1.16756	2.64675	0.441128	-1.18073	1.09e-18	4.12e-17
Q14168	MPP2	MAGUK p55 subfamily member 2	1.16614	1.89627	0.614967	-0.70142	1.09e-18	4.12e-17
Q15013	MAD2L1BP	MAD2L1-binding protein	1.2692	0.752274	1.68715	0.75459	1.09e-18	4.12e-17
Q9Y2J2	EPB41L3	Band 4.1-like protein 3	1.6192	3.54431	0.456844	-1.13023	1.12e-18	4.2e-17
O94762	RECQL5	ATP-dependent DNA helicase Q5	1.04166	0.629598	1.65449	0.726387	1.15e-18	4.28e-17
Q86T65	DAAM2	Disheveled-associated activator of morphogenesis 2	1.57612	3.65056	0.431747	-1.21174	1.18e-18	4.36e-17
Q96CN7	ISOC1	Isochorismatase domain-containing protein 1	1.88454	5.76283	0.327017	-1.61256	1.27e-18	4.68e-17
Q01082	SPTBN1	Spectrin beta chain, non-erythrocytic 1	1.14967	1.85559	0.619569	-0.690664	1.31e-18	4.73e-17
Q13535	ATR	Serine/threonine-protein kinase ATR	0.601913	0.322414	1.86689	0.90064	1.31e-18	4.73e-17
P12111	COL6A3	Collagen alpha-3(VI) chain	1.92824	5.37006	0.359072	-1.47766	1.41e-18	5.04e-17
O15400	STX7	Syntaxin-7	0.921774	1.89836	0.485563	-1.04227	1.41e-18	5.04e-17
Q8N573	OXR1	Oxidation resistance protein 1	1.52877	2.93808	0.520331	-0.942498	1.49e-18	5.28e-17
P00352	ALDH1A1	Retinal dehydrogenase 1	1.36589	7.02978	0.194301	-2.36364	1.53e-18	5.34e-17
Q99575	POP1	Ribonucleases P/MRP protein subunit POP1	0.909244	0.606298	1.49967	0.584642	1.53e-18	5.34e-17
Q5VU97	CACHD1	VWFA and cache domain-containing protein 1	1.88071	4.17962	0.449972	-1.15209	1.57e-18	5.41e-17
P46821	MAP1B	Microtubule-associated protein 1B	0.325763	0.544414	0.598375	-0.740879	1.57e-18	5.41e-17
P37173	TGFBR2	TGF-beta receptor type-2	1.77111	3.58202	0.494444	-1.01612	1.61e-18	5.51e-17
Q14315	FLNC	Filamin-C	0.933979	3.34367	0.279328	-1.83997	1.65e-18	5.51e-17
Q02325	PLGLB1	Plasminogen-like protein B	1.86366	5.24235	0.355501	-1.49208	1.65e-18	5.51e-17
P49915	GMPS	GMP synthase [glutamine-hydrolyzing]	0.947451	0.619394	1.52964	0.613195	1.65e-18	5.51e-17
Q9ULJ3	ZBTB21	Zinc finger and BTB domain-containing protein 21	1.01619	0.699303	1.45314	0.539176	1.69e-18	5.62e-17
P34947	GRK5	G protein-coupled receptor kinase 5	0.510092	1.08225	0.471323	-1.08521	1.74e-18	5.73e-17
O15075	DCLK1	Serine/threonine-protein kinase DCLK1	1.33536	2.30281	0.579882	-0.78617	1.78e-18	5.74e-17
O14950	MYL12B	Myosin regulatory light chain 12B	0.105202	0.172975	0.608191	-0.717404	1.78e-18	5.74e-17
P19105	MYL12A	Myosin regulatory light chain 12A	0.105202	0.172975	0.608191	-0.717404	1.78e-18	5.74e-17
P24844	MYL9	Myosin regulatory light polypeptide 9	0.105202	0.172975	0.608191	-0.717404	1.78e-18	5.74e-17
P02671	FGA	Fibrinogen alpha chain	1.23407	2.35889	0.523158	-0.934681	1.83e-18	5.85e-17
P52701	MSH6	DNA mismatch repair protein Msh6	1.21733	0.564656	2.15589	1.10828	1.88e-18	5.97e-17
Q4KMG0	CDON	Cell adhesion molecule-related/down-regulated by oncogenes	2.64108	12.5645	0.210202	-2.25015	1.92e-18	6.05e-17
P84157	MXRA7	Matrix-remodeling-associated protein 7	0.998159	2.45388	0.406768	-1.29772	1.92e-18	6.05e-17
O94819	KBTBD11	Kelch repeat and BTB domain-containing protein 11	1.10715	2.98741	0.370605	-1.43205	2.03e-18	6.29e-17
Q96DY7	MTBP	Mdm2-binding protein	0.589451	0.232675	2.53336	1.34105	2.03e-18	6.29e-17
P04406	GAPDH	Glyceraldehyde-3-phosphate dehydrogenase	1.84494	3.4462	0.535355	-0.901432	2.13e-18	6.55e-17
P09972	ALDOC	Fructose-bisphosphate aldolase C	1.60278	2.76587	0.579485	-0.787156	2.13e-18	6.55e-17
P28482	MAPK1	Mitogen-activated protein kinase 1	1.37203	3.64949	0.375951	-1.41138	2.19e-18	6.64e-17
Q9NS87	KIF15	Kinesin-like protein KIF15	0.596584	0.384246	1.55261	0.634698	2.19e-18	6.64e-17
P30411	BDKRB2	B2 bradykinin receptor	0.780942	1.74519	0.447481	-1.1601	2.36e-18	7.05e-17
P26678	PLN	Cardiac phospholamban	0.95676	2.07448	0.461204	-1.11652	2.36e-18	7.05e-17
Q6IBW4	NCAPH2	Condensin-2 complex subunit H2	0.911672	0.598575	1.52307	0.606983	2.36e-18	7.05e-17
P37837	TALDO1	Transaldolase	1.53752	2.66088	0.577824	-0.791297	2.43e-18	7.19e-17
Q56NI9	ESCO2	N-acetyltransferase ESCO2	0.507923	0.241948	2.09931	1.06991	2.49e-18	7.34e-17
P04183	TK1	Thymidine kinase, cytosolic	0.978447	0.56105	1.74396	0.802365	2.62e-18	7.68e-17
Q99961	SH3GL1	Endophilin-A2	0.138222	0.308619	0.447873	-1.15884	2.69e-18	7.75e-17
Q14680	MELK	Maternal embryonic leucine zipper kinase	0.485565	0.258508	1.87834	0.909457	2.69e-18	7.75e-17
O96019	ACTL6A	Actin-like protein 6A	1.33052	0.60602	2.19551	1.13456	2.69e-18	7.75e-17
Q99666	RGPD5	RANBP2-like and GRIP domain-containing protein 5/6	0.714577	0.487475	1.46587	0.55176	2.76e-18	7.86e-17
Q12906	ILF3	Interleukin enhancer-binding factor 3	1.121	0.75953	1.47591	0.561602	2.76e-18	7.86e-17
Q8TBN0	RAB3IL1	Guanine nucleotide exchange factor for Rab-3A	1.08006	2.25225	0.479546	-1.06026	2.83e-18	8.02e-17
Q8WYA6	CTNNBL1	Beta-catenin-like protein 1	1.34523	0.909169	1.47963	0.565232	2.98e-18	8.4e-17
Q9NRF9	POLE3	DNA polymerase epsilon subunit 3	0.955408	0.451317	2.11693	1.08198	3.13e-18	8.74e-17
P41587	VIPR2	Vasoactive intestinal polypeptide receptor 2	1.52088	3.385	0.4493	-1.15425	3.22e-18	8.88e-17
O95758	PTBP3	Polypyrimidine tract-binding protein 3	1.66057	0.802625	2.06892	1.04888	3.22e-18	8.88e-17
Q9ULC3	RAB23	Ras-related protein Rab-23	1.3268	3.93985	0.336763	-1.57019	3.3e-18	9.06e-17
Q9P258	RCC2	Protein RCC2	1.95484	1.15119	1.6981	0.763923	3.38e-18	9.24e-17
P40938	RFC3	Replication factor C subunit 3	1.06429	0.541023	1.96717	0.976125	3.56e-18	9.68e-17
Q15195	PLGLA	Plasminogen-like protein A	1.86366	5.24235	0.355501	-1.49208	3.65e-18	9.78e-17
P02724	GYPA	Glycophorin-A	1.28232	2.74928	0.46642	-1.1003	3.65e-18	9.78e-17
Q8TF76	HASPIN	Serine/threonine-protein kinase haspin	0.822492	0.450253	1.82673	0.869265	3.65e-18	9.78e-17
O60229	KALRN	Kalirin	2.49157	9.79108	0.254474	-1.97441	3.75e-18	9.88e-17
P08047	SP1	Transcription factor Sp1	0.904024	1.30488	0.692805	-0.52948	3.75e-18	9.88e-17
Q06330	RBPJ	Recombining binding protein suppressor of hairless	1.22147	0.850864	1.43556	0.521618	3.75e-18	9.88e-17
Q9HAW0	BRF2	Transcription factor IIIB 50 kDa subunit	1.15596	0.709513	1.62924	0.704197	3.85e-18	1.01e-16
P05129	PRKCG	Protein kinase C gamma type	2.41423	7.31518	0.33003	-1.59933	4.05e-18	1.05e-16
O14715	RGPD8	RANBP2-like and GRIP domain-containing protein 8	0.714577	0.487475	1.46587	0.55176	4.05e-18	1.05e-16
Q96T88	UHRF1	E3 ubiquitin-protein ligase UHRF1	1.07224	0.598086	1.79278	0.842201	4.26e-18	1.1e-16
Q99502	EYA1	Eyes absent homolog 1	1.18317	2.58188	0.458259	-1.12577	4.37e-18	1.12e-16
Q13424	SNTA1	Alpha-1-syntrophin	0.815562	1.20984	0.674108	-0.568949	4.37e-18	1.12e-16
Q9BZ23	PANK2	Pantothenate kinase 2, mitochondrial	0.631926	1.00598	0.628171	-0.67077	4.48e-18	1.14e-16
Q03468	ERCC6	DNA excision repair protein ERCC-6	1.55594	0.854394	1.8211	0.86481	4.48e-18	1.14e-16
P29972	AQP1	Aquaporin-1	1.32513	3.41885	0.387596	-1.36737	4.72e-18	1.18e-16
O95997	PTTG1	Securin	0.267816	0.0878516	3.0485	1.6081	4.72e-18	1.18e-16
Q01995	TAGLN	Transgelin	0.55412	1.11197	0.498323	-1.00485	4.84e-18	1.2e-16
Q6UX71	PLXDC2	Plexin domain-containing protein 2	1.27747	2.21222	0.577461	-0.792205	4.84e-18	1.2e-16
Q9Y4G8	RAPGEF2	Rap guanine nucleotide exchange factor 2	0.31062	0.522979	0.593944	-0.751602	4.84e-18	1.2e-16
P06396	GSN	Gelsolin	1.32686	3.89573	0.340594	-1.55387	5.22e-18	1.27e-16
O95398	RAPGEF3	Rap guanine nucleotide exchange factor 3	1.07644	2.35878	0.456355	-1.13177	5.22e-18	1.27e-16
P61956	SUMO2	Small ubiquitin-related modifier 2	1.25951	0.737171	1.70857	0.772787	5.22e-18	1.27e-16
Q15811	ITSN1	Intersectin-1	0.940494	1.53392	0.61313	-0.705735	5.36e-18	1.3e-16
Q96P48	ARAP1	Arf-GAP with Rho-GAP domain, ANK repeat and PH domain-containing protein 1	0.752607	1.40933	0.534019	-0.905037	5.49e-18	1.33e-16
Q562R1	ACTBL2	Beta-actin-like protein 2	1.22496	3.07672	0.39814	-1.32865	5.64e-18	1.35e-16
P55317	FOXA1	Hepatocyte nuclear factor 3-alpha	1.20282	0.663324	1.81332	0.858632	5.78e-18	1.38e-16
Q6ZMP0	THSD4	Thrombospondin type-1 domain-containing protein 4	2.45409	6.64764	0.369167	-1.43765	5.93e-18	1.4e-16
Q8NBV4	PLPP7	Inactive phospholipid phosphatase 7	0.89733	1.77303	0.506101	-0.982503	5.93e-18	1.4e-16
Q8N122	RPTOR	Regulatory-associated protein of mTOR	0.870478	1.24553	0.698879	-0.516885	6.08e-18	1.43e-16
Q96RY7	IFT140	Intraflagellar transport protein 140 homolog	1.02911	2.1895	0.470018	-1.08921	6.56e-18	1.52e-16
P32119	PRDX2	Peroxiredoxin-2	0.671507	1.26794	0.529606	-0.91701	6.56e-18	1.52e-16
Q9Y4G6	TLN2	Talin-2	1.13361	2.45272	0.462183	-1.11346	6.73e-18	1.55e-16
Q9BQS7	HEPH	Hephaestin	2.34417	9.42684	0.24867	-2.0077	6.9e-18	1.57e-16
Q96GV9	C5orf30	UNC119-binding protein C5orf30	0.356644	0.236867	1.50567	0.590409	6.9e-18	1.57e-16
Q8IYD8	FANCM	Fanconi anemia group M protein	0.764867	0.303855	2.51721	1.33182	6.9e-18	1.57e-16
Q96G23	CERS2	Ceramide synthase 2	1.73182	0.964544	1.79548	0.844369	7.08e-18	1.6e-16
P13807	GYS1	Glycogen [starch] synthase, muscle	1.14917	1.6364	0.702253	-0.509937	7.26e-18	1.63e-16
O60861	GAS7	Growth arrest-specific protein 7	2.02331	3.86302	0.523765	-0.933008	7.45e-18	1.64e-16
Q9Y490	TLN1	Talin-1	1.5724	2.87694	0.546554	-0.871565	7.45e-18	1.64e-16
P50895	BCAM	Basal cell adhesion molecule	1.16733	1.90089	0.614096	-0.703464	7.45e-18	1.64e-16
P78345	RPP38	Ribonuclease P protein subunit p38	0.341072	0.0937002	3.64004	1.86395	7.45e-18	1.64e-16
Q8WXF7	ATL1	Atlastin-1	1.80814	3.57543	0.505713	-0.983609	7.64e-18	1.65e-16
Q02447	SP3	Transcription factor Sp3	1.05513	1.73294	0.608867	-0.715801	7.64e-18	1.65e-16
P23634	ATP2B4	Plasma membrane calcium-transporting ATPase 4	1.32145	2.10423	0.627995	-0.671176	7.64e-18	1.65e-16
Q969T4	UBE2E3	Ubiquitin-conjugating enzyme E2 E3	1.35163	0.756565	1.78653	0.837161	7.64e-18	1.65e-16
O75362	ZNF217	Zinc finger protein 217	0.786795	0.533017	1.47612	0.561808	7.84e-18	1.68e-16
P06748	NPM1	Nucleophosmin	0.622635	0.413187	1.50691	0.591593	7.84e-18	1.68e-16
Q9BYX7	POTEKP	Putative beta-actin-like protein 3	1.22496	3.07672	0.39814	-1.32865	8.04e-18	1.72e-16
P23470	PTPRG	Receptor-type tyrosine-protein phosphatase gamma	0.768729	1.78873	0.429762	-1.21839	8.24e-18	1.76e-16
Q9UN70	PCDHGC3	Protocadherin gamma-C3	3.69411	9.84843	0.375096	-1.41467	8.45e-18	1.79e-16
Q96LT9	RNPC3	RNA-binding region-containing protein 3	1.62111	1.13909	1.42315	0.509092	8.45e-18	1.79e-16
Q96QB1	DLC1	Rho GTPase-activating protein 7	1.56585	2.65997	0.588672	-0.764463	8.67e-18	1.82e-16
Q14643	ITPR1	Inositol 1,4,5-trisphosphate receptor type 1	0.61468	1.25176	0.491054	-1.02605	8.89e-18	1.86e-16
Q9UBG0	MRC2	C-type mannose receptor 2	1.24172	2.97931	0.416781	-1.26264	9.12e-18	1.89e-16
Q13425	SNTB2	Beta-2-syntrophin	1.15669	2.3324	0.495925	-1.01181	9.12e-18	1.89e-16
Q9BYB0	SHANK3	SH3 and multiple ankyrin repeat domains protein 3	1.25762	2.0567	0.611475	-0.709635	9.12e-18	1.89e-16
Q9H0D6	XRN2	5'-3' exoribonuclease 2	1.10258	0.765861	1.43967	0.525735	9.35e-18	1.93e-16
Q9NVE7	PANK4	Pantothenate kinase 4	1.36768	3.18553	0.429342	-1.2198	9.59e-18	1.96e-16
Q99504	EYA3	Eyes absent homolog 3	1.24061	0.726876	1.70677	0.771272	9.59e-18	1.96e-16
P31350	RRM2	Ribonucleoside-diphosphate reductase subunit M2	0.419611	0.235524	1.7816	0.833175	9.84e-18	2e-16
Q9UEY8	ADD3	Gamma-adducin	1.05332	1.71084	0.615676	-0.699758	1.01e-17	2.05e-16
Q6S8J3	POTEE	POTE ankyrin domain family member E	1.22496	3.07672	0.39814	-1.32865	1.06e-17	2.15e-16
A5A3E0	POTEF	POTE ankyrin domain family member F	1.22496	3.07672	0.39814	-1.32865	1.09e-17	2.18e-16
Q92777	SYN2	Synapsin-2	0.352144	0.687381	0.512299	-0.964943	1.09e-17	2.18e-16
P02768	ALB	Serum albumin	1.43494	2.83014	0.50702	-0.979885	1.12e-17	2.21e-16
P05412	JUN	Transcription factor AP-1	0.349388	0.614887	0.568214	-0.815493	1.12e-17	2.21e-16
P26045	PTPN3	Tyrosine-protein phosphatase non-receptor type 3	0.995083	0.449216	2.21515	1.14741	1.12e-17	2.21e-16
O94964	SOGA1	Protein SOGA1	1.72682	1.16698	1.47973	0.565338	1.14e-17	2.26e-16
Q14678	KANK1	KN motif and ankyrin repeat domain-containing protein 1	1.12853	2.09257	0.539302	-0.890835	1.17e-17	2.31e-16
O75061	DNAJC6	Putative tyrosine-protein phosphatase auxilin	0.397276	0.765668	0.518862	-0.946577	1.2e-17	2.35e-16
P78545	ELF3	ETS-related transcription factor Elf-3	3.02693	1.16889	2.58958	1.37272	1.23e-17	2.4e-16
P01024	C3	Complement C3	1.98841	6.20413	0.320498	-1.64161	1.27e-17	2.45e-16
Q9NQG5	RPRD1B	Regulation of nuclear pre-mRNA domain-containing protein 1B	1.60139	1.11383	1.43773	0.523792	1.3e-17	2.51e-16
Q9BR39	JPH2	Junctophilin-2	0.9169	1.73289	0.529117	-0.918341	1.33e-17	2.55e-16
P49588	AARS	Alanine--tRNA ligase, cytoplasmic	1.22755	0.622435	1.97217	0.979786	1.33e-17	2.55e-16
Q14432	PDE3A	cGMP-inhibited 3',5'-cyclic phosphodiesterase A	0.276535	0.440976	0.627097	-0.673239	1.36e-17	2.61e-16
O14495	PLPP3	Phospholipid phosphatase 3	1.63286	4.28255	0.381283	-1.39106	1.4e-17	2.65e-16
O15265	ATXN7	Ataxin-7	1.13852	0.755371	1.50723	0.591897	1.4e-17	2.65e-16
Q9UBP9	GULP1	PTB domain-containing engulfment adapter protein 1	0.954134	1.61425	0.591069	-0.758602	1.47e-17	2.74e-16
Q9H7C4	SYNC	Syncoilin	0.627484	0.998147	0.628649	-0.669673	1.47e-17	2.74e-16
P55854	SUMO3	Small ubiquitin-related modifier 3	1.25951	0.737171	1.70857	0.772787	1.47e-17	2.74e-16
Q92556	ELMO1	Engulfment and cell motility protein 1	1.9234	2.94365	0.653405	-0.613951	1.51e-17	2.79e-16
O15083	ERC2	ERC protein 2	0.627026	0.298761	2.09876	1.06953	1.51e-17	2.79e-16
Q99788	CMKLR1	Chemokine-like receptor 1	0.909202	1.32171	0.687898	-0.539734	1.55e-17	2.85e-16
P12277	CKB	Creatine kinase B-type	0.972367	2.17886	0.446273	-1.164	1.59e-17	2.9e-16
O75190	DNAJB6	DnaJ homolog subfamily B member 6	1.06598	1.51463	0.703791	-0.50678	1.59e-17	2.9e-16
Q12946	FOXF1	Forkhead box protein F1	1.63898	3.39057	0.483393	-1.04873	1.63e-17	2.96e-16
P20749	BCL3	B-cell lymphoma 3 protein	1.77594	1.06977	1.66011	0.731282	1.63e-17	2.96e-16
Q9NZH5	PTTG2	Securin-2	0.267816	0.0878516	3.0485	1.6081	1.67e-17	3.02e-16
P02730	SLC4A1	Band 3 anion transport protein	1.63739	5.49465	0.297997	-1.74663	1.71e-17	3.07e-16
P02511	CRYAB	Alpha-crystallin B chain	1.14905	2.90596	0.395412	-1.33857	1.71e-17	3.07e-16
Q9BUZ4	TRAF4	TNF receptor-associated factor 4	1.12453	0.417211	2.69535	1.43047	1.71e-17	3.07e-16
P29536	LMOD1	Leiomodin-1	1.37136	3.88025	0.35342	-1.50054	1.75e-17	3.12e-16
Q8TDS4	HCAR2	Hydroxycarboxylic acid receptor 2	2.64119	1.22593	2.15444	1.10731	1.75e-17	3.12e-16
Q9Y6F6	MRVI1	Protein MRVI1	1.409	2.72059	0.517902	-0.949248	1.8e-17	3.19e-16
Q460N5	PARP14	Protein mono-ADP-ribosyltransferase PARP14	2.63067	0.973554	2.70213	1.4341	1.84e-17	3.26e-16
P24941	CDK2	Cyclin-dependent kinase 2	0.904933	0.427831	2.11516	1.08077	2.04e-17	3.58e-16
Q00526	CDK3	Cyclin-dependent kinase 3	0.904933	0.427831	2.11516	1.08077	2.04e-17	3.58e-16
Q9UH92	MLX	Max-like protein X	1.80183	6.57748	0.27394	-1.86807	2.09e-17	3.62e-16
P51513	NOVA1	RNA-binding protein Nova-1	1.12363	2.46035	0.456695	-1.1307	2.09e-17	3.62e-16
Q9HCL0	PCDH18	Protocadherin-18	1.47794	2.72187	0.542988	-0.881009	2.09e-17	3.62e-16
P14923	JUP	Junction plakoglobin	2.22961	1.15797	1.92544	0.945188	2.09e-17	3.62e-16
P21333	FLNA	Filamin-A	1.25148	2.77101	0.451634	-1.14677	2.14e-17	3.7e-16
Q567U6	CCDC93	Coiled-coil domain-containing protein 93	0.754394	0.360944	2.09006	1.06354	2.2e-17	3.78e-16
Q9UIF9	BAZ2A	Bromodomain adjacent to zinc finger domain protein 2A	0.776636	0.477095	1.62784	0.702962	2.25e-17	3.86e-16
O15061	SYNM	Synemin	0.749451	1.84935	0.405252	-1.30311	2.31e-17	3.95e-16
P35556	FBN2	Fibrillin-2	0.58609	1.81959	0.322101	-1.63442	2.43e-17	4.11e-16
O94782	USP1	Ubiquitin carboxyl-terminal hydrolase 1	0.521599	0.322381	1.61796	0.694172	2.43e-17	4.11e-16
P42226	STAT6	Signal transducer and activator of transcription 6	1.31456	4.27978	0.307155	-1.70296	2.49e-17	4.19e-16
Q15139	PRKD1	Serine/threonine-protein kinase D1	1.00951	1.69153	0.596803	-0.744672	2.49e-17	4.19e-16
Q15700	DLG2	Disks large homolog 2	1.41767	3.13857	0.451691	-1.14659	2.61e-17	4.37e-16
P53814	SMTN	Smoothelin	0.859598	1.66123	0.517447	-0.950516	2.61e-17	4.37e-16
P61160	ACTR2	Actin-related protein 2	2.07005	3.61501	0.572625	-0.804337	2.82e-17	4.65e-16
P48681	NES	Nestin	1.08165	1.75355	0.616834	-0.697046	2.82e-17	4.65e-16
Q9NVU0	POLR3E	DNA-directed RNA polymerase III subunit RPC5	1.08808	0.742704	1.46503	0.550928	2.82e-17	4.65e-16
O15258	RER1	Protein RER1	2.95064	1.94251	1.51898	0.603107	2.82e-17	4.65e-16
P21453	S1PR1	Sphingosine 1-phosphate receptor 1	0.688371	2.58262	0.26654	-1.90758	2.96e-17	4.87e-16
A6QL63	BTBD11	Ankyrin repeat and BTB/POZ domain-containing protein BTBD11	1.87871	6.24746	0.300715	-1.73353	3.11e-17	5.09e-16
O14979	HNRNPDL	Heterogeneous nuclear ribonucleoprotein D-like	1.87627	1.04916	1.78835	0.838628	3.11e-17	5.09e-16
Q9NZJ4	SACS	Sacsin	0.434936	0.942266	0.461586	-1.11533	3.27e-17	5.33e-16
Q86TV6	TTC7B	Tetratricopeptide repeat protein 7B	1.14523	2.107	0.543535	-0.879555	3.44e-17	5.53e-16
Q14147	DHX34	Probable ATP-dependent RNA helicase DHX34	0.901218	0.631529	1.42704	0.513027	3.44e-17	5.53e-16
Q9BRA0	NAA38	N-alpha-acetyltransferase 38, NatC auxiliary subunit	2.48921	1.20221	2.07052	1.04999	3.44e-17	5.53e-16
Q15111	PLCL1	Inactive phospholipase C-like protein 1	1.28376	2.82704	0.454102	-1.13891	3.7e-17	5.89e-16
Q9UNS1	TIMELESS	Protein timeless homolog	0.496501	0.323689	1.53388	0.617189	3.7e-17	5.89e-16
Q92922	SMARCC1	SWI/SNF complex subunit SMARCC1	0.627561	0.403148	1.55665	0.638445	3.7e-17	5.89e-16
Q16555	DPYSL2	Dihydropyrimidinase-related protein 2	0.391724	0.665676	0.58846	-0.764983	3.79e-17	6.02e-16
P17252	PRKCA	Protein kinase C alpha type	1.17104	2.78441	0.420572	-1.24957	3.89e-17	6.15e-16
Q0VF96	CGNL1	Cingulin-like protein 1	1.35747	2.43036	0.558549	-0.840245	4.09e-17	6.44e-16
Q15649	ZNHIT3	Zinc finger HIT domain-containing protein 3	1.00547	0.589521	1.70557	0.770256	4.4e-17	6.9e-16
Q8N5W9	RFLNB	Refilin-B	0.486612	1.33669	0.364042	-1.45782	4.51e-17	7.01e-16
Q9BX63	BRIP1	Fanconi anemia group J protein	0.467789	0.22477	2.08119	1.05741	4.51e-17	7.01e-16
Q9H223	EHD4	EH domain-containing protein 4	1.74105	7.1187	0.244574	-2.03165	4.74e-17	7.23e-16
O00423	EML1	Echinoderm microtubule-associated protein-like 1	1.11222	2.53451	0.438828	-1.18827	4.74e-17	7.23e-16
O96007	MOCS2	Molybdopterin synthase catalytic subunit	0.711722	1.34458	0.529326	-0.917771	4.74e-17	7.23e-16
P30086	PEBP1	Phosphatidylethanolamine-binding protein 1	1.44568	2.58343	0.559598	-0.837538	4.74e-17	7.23e-16
P51911	CNN1	Calponin-1	1.10596	2.42153	0.456721	-1.13062	4.86e-17	7.37e-16
P25098	GRK2	Beta-adrenergic receptor kinase 1	2.74762	1.51132	1.81803	0.862373	4.86e-17	7.37e-16
Q5U651	RASIP1	Ras-interacting protein 1	1.32194	2.40314	0.550088	-0.862266	4.98e-17	7.49e-16
Q96DR7	ARHGEF26	Rho guanine nucleotide exchange factor 26	0.392882	0.661318	0.594089	-0.751249	4.98e-17	7.49e-16
P40306	PSMB10	Proteasome subunit beta type-10	2.29012	1.51377	1.51286	0.597276	5.36e-17	7.95e-16
P49019	HCAR3	Hydroxycarboxylic acid receptor 3	2.6733	1.18417	2.25753	1.17474	5.36e-17	7.95e-16
O14929	HAT1	Histone acetyltransferase type B catalytic subunit	0.818652	0.185577	4.41139	2.14123	5.36e-17	7.95e-16
Q96T51	RUFY1	RUN and FYVE domain-containing protein 1	0.615488	0.967365	0.636252	-0.652331	5.5e-17	8.06e-16
O75526	RBMXL2	RNA-binding motif protein, X-linked-like-2	0.745304	0.434201	1.7165	0.779467	5.5e-17	8.06e-16
Q8N7X1	RBMXL3	RNA-binding motif protein, X-linked-like-3	0.745304	0.434201	1.7165	0.779467	5.5e-17	8.06e-16
Q04721	NOTCH2	Neurogenic locus notch homolog protein 2	0.834712	1.27301	0.655699	-0.608894	5.78e-17	8.42e-16
Q96QE3	ATAD5	ATPase family AAA domain-containing protein 5	0.434107	0.264572	1.64079	0.714388	5.78e-17	8.42e-16
Q8TC92	ENOX1	Ecto-NOX disulfide-thiol exchanger 1	1.30249	2.57132	0.506546	-0.981236	7.03e-17	1.02e-15
Q8IYU2	HACE1	E3 ubiquitin-protein ligase HACE1	1.29578	2.62267	0.49407	-1.01721	7.39e-17	1.06e-15
P29558	RBMS1	RNA-binding motif, single-stranded-interacting protein 1	0.288879	0.151828	1.90268	0.928029	7.39e-17	1.06e-15
Q9H063	MAF1	Repressor of RNA polymerase III transcription MAF1 homolog	0.931607	1.40918	0.661097	-0.597066	7.76e-17	1.11e-15
Q13541	EIF4EBP1	Eukaryotic translation initiation factor 4E-binding protein 1	0.96916	1.41231	0.686224	-0.543248	7.76e-17	1.11e-15
O60238	BNIP3L	BCL2/adenovirus E1B 19 kDa protein-interacting protein 3-like	0.496864	0.761609	0.652387	-0.616199	7.95e-17	1.14e-15
Q03591	CFHR1	Complement factor H-related protein 1	1.38534	3.6262	0.382035	-1.38822	8.15e-17	1.16e-15
O14576	DYNC1I1	Cytoplasmic dynein 1 intermediate chain 1	1.49721	3.51195	0.426318	-1.23	8.15e-17	1.16e-15
P52943	CRIP2	Cysteine-rich protein 2	0.541525	1.05892	0.511393	-0.967495	8.35e-17	1.18e-15
Q9H8Y8	GORASP2	Golgi reassembly-stacking protein 2	0.71145	1.12357	0.633204	-0.659259	8.35e-17	1.18e-15
O60239	SH3BP5	SH3 domain-binding protein 5	0.554373	1.02704	0.539777	-0.889566	8.56e-17	1.2e-15
O00267	SUPT5H	Transcription elongation factor SPT5	0.535034	0.954425	0.560583	-0.835	8.77e-17	1.23e-15
Q14738	PPP2R5D	Serine/threonine-protein phosphatase 2A 56 kDa regulatory subunit delta isoform	0.337169	0.702524	0.47994	-1.05907	8.99e-17	1.25e-15
Q9NZL4	HSPBP1	Hsp70-binding protein 1	0.753833	1.15154	0.654631	-0.611247	8.99e-17	1.25e-15
P09493	TPM1	Tropomyosin alpha-1 chain	1.32758	3.33237	0.39839	-1.32775	9.44e-17	1.31e-15
Q6IQ26	DENND5A	DENN domain-containing protein 5A	0.782336	1.12474	0.695573	-0.523727	9.44e-17	1.31e-15
P16070	CD44	CD44 antigen	1.47699	2.2584	0.654	-0.612638	9.91e-17	1.36e-15
Q6XE24	RBMS3	RNA-binding motif, single-stranded-interacting protein 3	0.29095	0.151007	1.92673	0.946153	9.91e-17	1.36e-15
Q9HB90	RRAGC	Ras-related GTP-binding protein C	0.382364	0.737926	0.51816	-0.948531	1.02e-16	1.39e-15
O94885	SASH1	SAM and SH3 domain-containing protein 1	1.43995	2.14533	0.671202	-0.575182	1.02e-16	1.39e-15
O15119	TBX3	T-box transcription factor TBX3	1.36891	2.03068	0.674115	-0.568933	1.04e-16	1.42e-15
Q9Y5S1	TRPV2	Transient receptor potential cation channel subfamily V member 2	4.37171	9.96115	0.438876	-1.18812	1.07e-16	1.44e-15
Q5VUB5	FAM171A1	Protein FAM171A1	0.615755	1.17163	0.525553	-0.928093	1.07e-16	1.44e-15
Q0ZGT2	NEXN	Nexilin	1.22389	2.61501	0.468024	-1.09535	1.12e-16	1.5e-15
Q96AM1	MRGPRF	Mas-related G-protein coupled receptor member F	1.16794	1.69089	0.690726	-0.533814	1.12e-16	1.5e-15
Q16537	PPP2R5E	Serine/threonine-protein phosphatase 2A 56 kDa regulatory subunit epsilon isoform	0.39919	0.682388	0.584989	-0.773518	1.18e-16	1.56e-15
Q09666	AHNAK	Neuroblast differentiation-associated protein AHNAK	0.644897	0.939855	0.686167	-0.543369	1.18e-16	1.56e-15
P78332	RBM6	RNA-binding protein 6	0.584248	0.383601	1.52306	0.606976	1.18e-16	1.56e-15
Q01813	PFKP	ATP-dependent 6-phosphofructokinase, platelet type	0.269933	0.713502	0.378321	-1.40232	1.23e-16	1.63e-15
Q14677	CLINT1	Clathrin interactor 1	2.05324	1.29006	1.59159	0.670465	1.23e-16	1.63e-15
P08670	VIM	Vimentin	0.373202	0.590728	0.631765	-0.66254	1.27e-16	1.66e-15
P62316	SNRPD2	Small nuclear ribonucleoprotein Sm D2	1.16966	0.82325	1.42078	0.506684	1.27e-16	1.66e-15
Q96TC7	RMDN3	Regulator of microtubule dynamics protein 3	2.58032	1.74788	1.47626	0.561946	1.27e-16	1.66e-15
O14578	CIT	Citron Rho-interacting kinase	0.58218	0.305548	1.90537	0.930068	1.3e-16	1.69e-15
Q9HA65	TBC1D17	TBC1 domain family member 17	1.38187	2.04193	0.676746	-0.563314	1.33e-16	1.72e-15
O94929	ABLIM3	Actin-binding LIM protein 3	0.845745	1.2353	0.684649	-0.546563	1.33e-16	1.72e-15
Q8IWS0	PHF6	PHD finger protein 6	0.610306	0.427093	1.42898	0.514982	1.33e-16	1.72e-15
P63165	SUMO1	Small ubiquitin-related modifier 1	1.21989	0.810544	1.50503	0.58979	1.33e-16	1.72e-15
O75628	REM1	GTP-binding protein REM 1	1.1169	1.71575	0.650972	-0.619334	1.39e-16	1.79e-15
Q08050	FOXM1	Forkhead box protein M1	0.489594	0.315746	1.55059	0.632819	1.39e-16	1.79e-15
Q9BUB5	MKNK1	MAP kinase-interacting serine/threonine-protein kinase 1	1.80481	1.14597	1.57492	0.655275	1.39e-16	1.79e-15
P13521	SCG2	Secretogranin-2	0.951778	3.69841	0.257348	-1.95821	1.46e-16	1.86e-15
P20645	M6PR	Cation-dependent mannose-6-phosphate receptor	1.051	1.50879	0.696586	-0.521627	1.46e-16	1.86e-15
Q6ZRV2	FAM83H	Protein FAM83H	1.86379	1.19679	1.55732	0.639068	1.5e-16	1.9e-15
P82987	ADAMTSL3	ADAMTS-like protein 3	1.70022	3.24416	0.524086	-0.932125	1.54e-16	1.94e-15
Q8IYW5	RNF168	E3 ubiquitin-protein ligase RNF168	1.33138	0.834673	1.5951	0.673644	1.54e-16	1.94e-15
P11532	DMD	Dystrophin	0.754979	1.39443	0.541425	-0.885166	1.57e-16	1.97e-15
A4D2H0	CTAGE15	cTAGE family member 15	0.683238	0.45684	1.49557	0.580699	1.57e-16	1.97e-15
Q9BY12	SCAPER	S phase cyclin A-associated protein in the endoplasmic reticulum	0.584045	0.348834	1.67428	0.74354	1.57e-16	1.97e-15
Q6T4R5	NHS	Nance-Horan syndrome protein	0.895425	1.46345	0.611858	-0.708731	1.61e-16	2e-15
Q53HL2	CDCA8	Borealin	0.576187	0.395259	1.45775	0.543741	1.61e-16	2e-15
Q9NRG9	AAAS	Aladin	1.0669	0.513549	2.07751	1.05485	1.61e-16	2e-15
P06493	CDK1	Cyclin-dependent kinase 1	0.830761	0.452805	1.8347	0.875543	1.69e-16	2.1e-15
Q8N5S9	CAMKK1	Calcium/calmodulin-dependent protein kinase kinase 1	0.560757	0.904471	0.619984	-0.689698	1.78e-16	2.19e-15
Q08493	PDE4C	cAMP-specific 3',5'-cyclic phosphodiesterase 4C	0.230325	0.363842	0.633036	-0.65964	1.87e-16	2.29e-15
Q92499	DDX1	ATP-dependent RNA helicase DDX1	1.76401	1.02564	1.71991	0.782332	1.87e-16	2.29e-15
Q8TAD7	OCC1	Overexpressed in colon carcinoma 1 protein	1.56381	3.24816	0.481445	-1.05456	1.96e-16	2.39e-15
Q9BYX4	IFIH1	Interferon-induced helicase C domain-containing protein 1	2.6123	1.58468	1.64847	0.721132	2.01e-16	2.44e-15
Q9H8U3	ZFAND3	AN1-type zinc finger protein 3	1.32759	0.643039	2.06456	1.04583	2.01e-16	2.44e-15
P15408	FOSL2	Fos-related antigen 2	1.71478	1.01065	1.69671	0.762736	2.06e-16	2.48e-15
Q96GX9	APIP	Methylthioribulose-1-phosphate dehydratase	1.1628	0.575194	2.02158	1.01549	2.06e-16	2.48e-15
P51636	CAV2	Caveolin-2	0.764642	1.79308	0.42644	-1.22959	2.11e-16	2.53e-15
O75909	CCNK	Cyclin-K	1.51965	1.03215	1.47231	0.558085	2.11e-16	2.53e-15
Q9Y448	KNSTRN	Small kinetochore-associated protein	0.466988	0.21348	2.1875	1.12928	2.16e-16	2.59e-15
O60784	TOM1	Target of Myb protein 1	1.00046	1.62001	0.617561	-0.695346	2.21e-16	2.64e-15
A0AVK6	E2F8	Transcription factor E2F8	1.2813	0.545255	2.34991	1.2326	2.21e-16	2.64e-15
Q14766	LTBP1	Latent-transforming growth factor beta-binding protein 1	2.42318	5.71396	0.424081	-1.23759	2.38e-16	2.83e-15
P27694	RPA1	Replication protein A 70 kDa DNA-binding subunit	0.862521	0.397527	2.16971	1.1175	2.38e-16	2.83e-15
Q13103	SPP2	Secreted phosphoprotein 24	1.60602	3.66154	0.438619	-1.18896	2.44e-16	2.88e-15
P11308	ERG	Transcriptional regulator ERG	0.724953	1.06054	0.683572	-0.548834	2.44e-16	2.88e-15
O60565	GREM1	Gremlin-1	1.07368	1.54957	0.692886	-0.52931	2.56e-16	3.01e-15
Q9NZL6	RGL1	Ral guanine nucleotide dissociation stimulator-like 1	1.2516	2.74863	0.455355	-1.13494	2.75e-16	3.21e-15
O60658	PDE8A	High affinity cAMP-specific and IBMX-insensitive 3',5'-cyclic phosphodiesterase 8A	0.51394	0.989632	0.519324	-0.945292	2.75e-16	3.21e-15
Q14156	EFR3A	Protein EFR3 homolog A	1.08791	1.9279	0.564297	-0.825472	2.75e-16	3.21e-15
Q9BRG2	SH2D3A	SH2 domain-containing protein 3A	2.25407	1.33875	1.68372	0.751651	2.88e-16	3.36e-15
Q96PY6	NEK1	Serine/threonine-protein kinase Nek1	1.16807	1.69626	0.688614	-0.538233	2.95e-16	3.42e-15
Q13464	ROCK1	Rho-associated protein kinase 1	0.993278	1.42968	0.694757	-0.525419	2.95e-16	3.42e-15
O60279	SUSD5	Sushi domain-containing protein 5	1.43216	2.65618	0.539181	-0.891159	3.03e-16	3.48e-15
Q8NC44	RETREG2	Reticulophagy regulator 2	1.08911	1.56546	0.695714	-0.523433	3.1e-16	3.54e-15
Q96NB3	ZNF830	Zinc finger protein 830	1.16187	0.706564	1.64439	0.717556	3.1e-16	3.54e-15
Q16659	MAPK6	Mitogen-activated protein kinase 6	1.35453	0.654925	2.06823	1.04839	3.1e-16	3.54e-15
Q8N5V2	NGEF	Ephexin-1	0.103412	0.25122	0.411637	-1.28056	3.17e-16	3.62e-15
Q8TBC5	ZSCAN18	Zinc finger and SCAN domain-containing protein 18	1.24098	1.85555	0.668795	-0.580365	3.5e-16	3.96e-15
Q14566	MCM6	DNA replication licensing factor MCM6	1.2715	0.823748	1.54356	0.62626	3.67e-16	4.13e-15
Q9NZQ7	CD274	Programmed cell death 1 ligand 1	4.27858	1.8513	2.31112	1.20859	3.67e-16	4.13e-15
Q86WC4	OSTM1	Osteopetrosis-associated transmembrane protein 1	0.376276	0.58015	0.648584	-0.624634	3.76e-16	4.22e-15
Q86XP3	DDX42	ATP-dependent RNA helicase DDX42	0.816595	0.54271	1.50466	0.589439	3.85e-16	4.32e-15
Q8TD19	NEK9	Serine/threonine-protein kinase Nek9	1.26622	2.10768	0.600761	-0.735136	3.94e-16	4.41e-15
Q9NXC5	MIOS	GATOR complex protein MIOS	1.29572	0.874336	1.48195	0.567497	4.13e-16	4.62e-15
P61266	STX1B	Syntaxin-1B	0.648131	1.47477	0.439478	-1.18614	4.34e-16	4.82e-15
Q15036	SNX17	Sorting nexin-17	0.488295	0.704047	0.693555	-0.527918	4.34e-16	4.82e-15
Q15772	SPEG	Striated muscle preferentially expressed protein kinase	0.945356	1.67861	0.563178	-0.828337	4.44e-16	4.91e-15
Q9UJX6	ANAPC2	Anaphase-promoting complex subunit 2	1.22048	0.849518	1.43667	0.522728	4.44e-16	4.91e-15
Q8IYH5	ZZZ3	ZZ-type zinc finger-containing protein 3	0.978655	0.677227	1.44509	0.53116	4.77e-16	5.25e-15
Q14966	ZNF638	Zinc finger protein 638	0.922589	0.637682	1.44679	0.532851	5.01e-16	5.5e-15
P35222	CTNNB1	Catenin beta-1	0.874717	1.44194	0.606623	-0.721128	5.38e-16	5.88e-15
A6NIX2	WTIP	Wilms tumor protein 1-interacting protein	1.29922	2.06711	0.628517	-0.669976	5.51e-16	6e-15
Q9BXW9	FANCD2	Fanconi anemia group D2 protein	0.506143	0.334951	1.51109	0.595594	5.64e-16	6.13e-15
P55198	MLLT6	Protein AF-17	0.782327	0.520221	1.50383	0.588646	5.78e-16	6.27e-15
O43395	PRPF3	U4/U6 small nuclear ribonucleoprotein Prp3	1.23348	0.824074	1.4968	0.581886	5.92e-16	6.4e-15
P19971	TYMP	Thymidine phosphorylase	2.98509	1.74799	1.70773	0.772077	6.21e-16	6.68e-15
O14936	CASK	Peripheral plasma membrane protein CASK	2.35744	0.906151	2.60159	1.3794	6.21e-16	6.68e-15
Q12791	KCNMA1	Calcium-activated potassium channel subunit alpha-1	0.807801	1.52095	0.531115	-0.912904	6.36e-16	6.82e-15
Q9BQJ4	TMEM47	Transmembrane protein 47	1.13782	1.96079	0.580286	-0.785164	6.51e-16	6.96e-15
Q9UGL1	KDM5B	Lysine-specific demethylase 5B	1.24469	0.609676	2.04156	1.02967	6.67e-16	7.08e-15
Q9Y467	SALL2	Sal-like protein 2	0.63474	1.35591	0.468127	-1.09503	6.99e-16	7.41e-15
P21796	VDAC1	Voltage-dependent anion-selective channel protein 1	1.27286	0.837368	1.52007	0.60414	7.33e-16	7.74e-15
P23327	HRC	Sarcoplasmic reticulum histidine-rich calcium-binding protein	1.10347	2.31939	0.475761	-1.07169	7.51e-16	7.91e-15
Q9UJQ4	SALL4	Sal-like protein 4	0.183245	0.264927	0.691682	-0.531819	7.69e-16	8.09e-15
Q8IX94	CTAGE4	cTAGE family member 4	0.674705	0.434314	1.55349	0.635517	8.06e-16	8.46e-15
Q9UJY1	HSPB8	Heat shock protein beta-8	1.18342	4.03162	0.293536	-1.76839	8.25e-16	8.6e-15
Q96JC9	EAF1	ELL-associated factor 1	0.813314	0.573179	1.41895	0.504828	8.25e-16	8.6e-15
A4FU28	CTAGE9	cTAGE family member 9	0.632843	0.426919	1.48235	0.567886	8.25e-16	8.6e-15
Q9UHR5	SAP30BP	SAP30-binding protein	1.19451	0.74303	1.60762	0.684928	8.66e-16	8.94e-15
P45880	VDAC2	Voltage-dependent anion-selective channel protein 2	2.02332	1.25259	1.61532	0.691816	8.66e-16	8.94e-15
Q9BUB4	ADAT1	tRNA-specific adenosine deaminase 1	1.03929	0.546119	1.90304	0.928305	8.86e-16	9.12e-15
P08913	ADRA2A	Alpha-2A adrenergic receptor	0.465477	1.3409	0.347137	-1.52642	9.08e-16	9.3e-15
O43182	ARHGAP6	Rho GTPase-activating protein 6	0.588771	0.881348	0.668035	-0.582005	9.08e-16	9.3e-15
Q9C0E4	GRIP2	Glutamate receptor-interacting protein 2	1.13586	2.19381	0.517758	-0.94965	9.74e-16	9.93e-15
Q5HYW2	NHSL2	NHS-like protein 2	1.15673	1.96133	0.589767	-0.761783	9.74e-16	9.93e-15
O75781	PALM	Paralemmin-1	0.518631	0.806379	0.64316	-0.63675	9.74e-16	9.93e-15
Q9BXJ5	C1QTNF2	Complement C1q tumor necrosis factor-related protein 2	1.61192	4.22914	0.381146	-1.39158	1.02e-15	1.04e-14
Q2M1K9	ZNF423	Zinc finger protein 423	0.935964	1.85302	0.505101	-0.985355	1.05e-15	1.06e-14
Q16623	STX1A	Syntaxin-1A	0.484305	1.27275	0.380518	-1.39396	1.15e-15	1.16e-14
P13861	PRKAR2A	cAMP-dependent protein kinase type II-alpha regulatory subunit	0.837871	1.21105	0.691854	-0.531461	1.15e-15	1.16e-14
Q70Z53	FRA10AC1	Protein FRA10AC1	0.758231	0.489871	1.54782	0.630235	1.18e-15	1.18e-14
P0C851	PIRT	Phosphoinositide-interacting protein	1.21317	4.47796	0.27092	-1.88406	1.23e-15	1.23e-14
Q15172	PPP2R5A	Serine/threonine-protein phosphatase 2A 56 kDa regulatory subunit alpha isoform	0.490841	0.854929	0.57413	-0.80055	1.23e-15	1.23e-14
P37802	TAGLN2	Transgelin-2	2.76196	1.52332	1.81313	0.85848	1.36e-15	1.34e-14
Q8NDX1	PSD4	PH and SEC7 domain-containing protein 4	3.87925	2.12022	1.82964	0.871562	1.36e-15	1.34e-14
Q08379	GOLGA2	Golgin subfamily A member 2	2.50034	1.59958	1.56312	0.644426	1.39e-15	1.37e-14
Q8NHJ6	LILRB4	Leukocyte immunoglobulin-like receptor subfamily B member 4	2.21381	1.381	1.60305	0.680819	1.39e-15	1.37e-14
P60981	DSTN	Destrin	1.67713	3.24073	0.517515	-0.950327	1.42e-15	1.4e-14
P68032	ACTC1	Actin, alpha cardiac muscle 1	1.21554	2.00282	0.606915	-0.720433	1.46e-15	1.43e-14
P10588	NR2F6	Nuclear receptor subfamily 2 group F member 6	1.23801	0.835623	1.48154	0.567095	1.49e-15	1.46e-14
Q13112	CHAF1B	Chromatin assembly factor 1 subunit B	0.670321	0.445991	1.50299	0.587837	1.49e-15	1.46e-14
P68133	ACTA1	Actin, alpha skeletal muscle	1.21554	2.00282	0.606915	-0.720433	1.53e-15	1.48e-14
Q8N5A5	ZGPAT	Zinc finger CCCH-type with G patch domain-containing protein	0.63675	0.374328	1.70105	0.766422	1.53e-15	1.48e-14
P63267	ACTG2	Actin, gamma-enteric smooth muscle	1.21554	2.00282	0.606915	-0.720433	1.56e-15	1.51e-14
Q8TBC3	SHKBP1	SH3KBP1-binding protein 1	1.44187	0.965738	1.49303	0.578242	1.56e-15	1.51e-14
Q8TDB6	DTX3L	E3 ubiquitin-protein ligase DTX3L	2.14171	1.45727	1.46968	0.555499	1.64e-15	1.58e-14
P08603	CFH	Complement factor H	1.38534	3.6262	0.382035	-1.38822	1.68e-15	1.62e-14
Q16666	IFI16	Gamma-interferon-inducible protein 16	1.79498	1.25688	1.42812	0.514121	1.72e-15	1.65e-14
P08697	SERPINF2	Alpha-2-antiplasmin	1.2269	2.97796	0.411992	-1.27931	1.84e-15	1.77e-14
P40939	HADHA	Trifunctional enzyme subunit alpha, mitochondrial	0.765183	0.372712	2.05301	1.03774	1.84e-15	1.77e-14
Q9BWH2	FUNDC2	FUN14 domain-containing protein 2	0.75113	1.2669	0.592889	-0.754166	1.88e-15	1.8e-14
Q13823	GNL2	Nucleolar GTP-binding protein 2	0.822895	0.564433	1.45791	0.543905	1.88e-15	1.8e-14
P46939	UTRN	Utrophin	1.38113	3.18319	0.433884	-1.20462	1.93e-15	1.84e-14
Q9Y5B6	PAXBP1	PAX3- and PAX7-binding protein 1	1.1376	0.75726	1.50226	0.58713	1.93e-15	1.84e-14
O95816	BAG2	BAG family molecular chaperone regulator 2	0.301135	0.619297	0.486253	-1.04022	1.97e-15	1.88e-14
Q6UX15	LAYN	Layilin	2.09024	4.70054	0.44468	-1.16916	2.02e-15	1.91e-14
P62736	ACTA2	Actin, aortic smooth muscle	1.21554	2.00282	0.606915	-0.720433	2.07e-15	1.95e-14
O95382	MAP3K6	Mitogen-activated protein kinase kinase kinase 6	4.53325	1.7038	2.66066	1.41179	2.07e-15	1.95e-14
Q9Y2K2	SIK3	Serine/threonine-protein kinase SIK3	0.645804	1.04387	0.618663	-0.692775	2.12e-15	1.99e-14
O75382	TRIM3	Tripartite motif-containing protein 3	1.15877	1.78682	0.64851	-0.624798	2.12e-15	1.99e-14
Q9NQC3	RTN4	Reticulon-4	1.07885	1.55153	0.695342	-0.524206	2.17e-15	2.03e-14
Q13761	RUNX3	Runt-related transcription factor 3	1.70022	0.971532	1.75004	0.807391	2.17e-15	2.03e-14
O43291	SPINT2	Kunitz-type protease inhibitor 2	3.62779	1.34808	2.69107	1.42818	2.22e-15	2.07e-14
Q96AC1	FERMT2	Fermitin family homolog 2	0.628281	1.03596	0.606475	-0.721481	2.27e-15	2.11e-14
Q96AY4	TTC28	Tetratricopeptide repeat protein 28	0.472495	0.703447	0.671685	-0.574143	2.44e-15	2.26e-14
Q9UDY2	TJP2	Tight junction protein ZO-2	1.22346	0.849835	1.43964	0.525709	2.49e-15	2.31e-14
Q14123	PDE1C	Calcium/calmodulin-dependent 3',5'-cyclic nucleotide phosphodiesterase 1C	1.2	3.09477	0.387749	-1.3668	2.87e-15	2.64e-14
P04264	KRT1	Keratin, type II cytoskeletal 1	1.32596	3.09154	0.428898	-1.22129	2.94e-15	2.69e-14
Q9ULT0	TTC7A	Tetratricopeptide repeat protein 7A	2.51092	1.74818	1.43631	0.522364	3e-15	2.75e-14
Q86X53	ERICH1	Glutamate-rich protein 1	0.953217	0.671821	1.41885	0.504727	3.15e-15	2.87e-14
O43684	BUB3	Mitotic checkpoint protein BUB3	1.43487	0.88345	1.62416	0.699695	3.22e-15	2.93e-14
P46020	PHKA1	Phosphorylase b kinase regulatory subunit alpha, skeletal muscle isoform	2.46837	1.24957	1.97537	0.982121	3.3e-15	2.99e-14
P35712	SOX6	Transcription factor SOX-6	0.126931	0.25918	0.489742	-1.02991	3.38e-15	3.05e-14
Q8TAF3	WDR48	WD repeat-containing protein 48	1.24558	2.51884	0.494507	-1.01594	3.38e-15	3.05e-14
Q8IUX7	AEBP1	Adipocyte enhancer-binding protein 1	1.86958	5.3596	0.348828	-1.51941	3.54e-15	3.18e-14
Q5T0W9	FAM83B	Protein FAM83B	0.865131	0.558422	1.54924	0.631563	3.54e-15	3.18e-14
O00470	MEIS1	Homeobox protein Meis1	2.23142	3.65299	0.610848	-0.711114	3.7e-15	3.33e-14
Q8TBZ6	TRMT10A	tRNA methyltransferase 10 homolog A	0.547751	0.36618	1.49585	0.580969	3.79e-15	3.4e-14
P08138	NGFR	Tumor necrosis factor receptor superfamily member 16	1.84212	4.88833	0.376842	-1.40797	3.97e-15	3.54e-14
Q8NB49	ATP11C	Phospholipid-transporting ATPase IG	0.524402	0.784089	0.668804	-0.580344	3.97e-15	3.54e-14
Q9UL26	RAB22A	Ras-related protein Rab-22A	1.46857	2.9255	0.501989	-0.994273	4.16e-15	3.69e-14
Q9HAV4	XPO5	Exportin-5	1.29741	0.818402	1.5853	0.664755	4.16e-15	3.69e-14
Q5T5C0	STXBP5	Syntaxin-binding protein 5	1.30085	1.97577	0.6584	-0.602963	4.26e-15	3.76e-14
Q155Q3	DIXDC1	Dixin	0.619073	0.878054	0.705051	-0.5042	4.26e-15	3.76e-14
Q86UF2	CTAGE6	cTAGE family member 6	0.678499	0.425772	1.59357	0.672266	4.26e-15	3.76e-14
Q9Y4J8	DTNA	Dystrobrevin alpha	1.22576	1.8701	0.655456	-0.60943	4.36e-15	3.84e-14
Q53EU6	GPAT3	Glycerol-3-phosphate acyltransferase 3	0.461596	1.24198	0.371661	-1.42794	4.46e-15	3.92e-14
Q9Y6N5	SQOR	Sulfide:quinone oxidoreductase, mitochondrial	2.13146	1.29565	1.64508	0.71816	4.56e-15	4.01e-14
Q9NR12	PDLIM7	PDZ and LIM domain protein 7	0.532349	0.940217	0.566198	-0.820621	4.89e-15	4.27e-14
Q9Y3E7	CHMP3	Charged multivesicular body protein 3	0.778782	1.18633	0.656466	-0.607207	4.89e-15	4.27e-14
Q9NZN4	EHD2	EH domain-containing protein 2	1.36611	2.99186	0.456609	-1.13097	5e-15	4.34e-14
Q02410	APBA1	Amyloid-beta A4 precursor protein-binding family A member 1	1.70009	2.68821	0.632424	-0.661036	5e-15	4.34e-14
Q9H410	DSN1	Kinetochore-associated protein DSN1 homolog	0.568959	0.35848	1.58714	0.666431	5e-15	4.34e-14
O15350	TP73	Tumor protein p73	2.05704	1.03527	1.98695	0.990559	5.12e-15	4.44e-14
Q92754	TFAP2C	Transcription factor AP-2 gamma	2.38713	1.57201	1.51852	0.602669	5.36e-15	4.64e-14
P13489	RNH1	Ribonuclease inhibitor	1.20163	2.02525	0.593323	-0.753109	5.49e-15	4.72e-14
Q96RY5	CRAMP1	Protein cramped-like	1.30771	0.919293	1.42252	0.508449	5.61e-15	4.83e-14
Q7Z3G6	PRICKLE2	Prickle-like protein 2	1.15888	1.98997	0.58236	-0.780017	5.75e-15	4.92e-14
Q8N6S5	ARL6IP6	ADP-ribosylation factor-like protein 6-interacting protein 6	0.961077	1.50511	0.638541	-0.647148	5.88e-15	5.02e-14
Q7Z417	NUFIP2	Nuclear fragile X mental retardation-interacting protein 2	0.51382	0.356194	1.44253	0.528602	5.88e-15	5.02e-14
Q969U6	FBXW5	F-box/WD repeat-containing protein 5	1.19145	2.57642	0.462445	-1.11265	6.16e-15	5.23e-14
Q8N697	SLC15A4	Solute carrier family 15 member 4	0.652805	1.21735	0.536253	-0.899015	6.16e-15	5.23e-14
O75970	MPDZ	Multiple PDZ domain protein	0.532294	0.879567	0.605178	-0.724568	6.16e-15	5.23e-14
Q9H4Z3	PCIF1	mRNA (2'-O-methyladenosine-N(6)-)-methyltransferase	0.812529	1.19895	0.6777	-0.561282	6.45e-15	5.47e-14
Q7L804	RAB11FIP2	Rab11 family-interacting protein 2	0.265618	0.550418	0.482576	-1.05117	7.07e-15	5.98e-14
Q9P219	CCDC88C	Protein Daple	1.5919	1.01052	1.57533	0.65565	7.4e-15	6.24e-14
P31323	PRKAR2B	cAMP-dependent protein kinase type II-beta regulatory subunit	1.15328	1.77015	0.651516	-0.618128	7.57e-15	6.36e-14
O43683	BUB1	Mitotic checkpoint serine/threonine-protein kinase BUB1	0.369961	0.191862	1.92827	0.947306	7.57e-15	6.36e-14
P63092	GNAS	Guanine nucleotide-binding protein G(s) subunit alpha isoforms short	0.872458	1.33357	0.654228	-0.612134	7.93e-15	6.64e-14
Q96MG7	NSMCE3	Non-structural maintenance of chromosomes element 3 homolog	0.976237	0.669905	1.45728	0.543276	8.3e-15	6.94e-14
P05362	ICAM1	Intercellular adhesion molecule 1	2.5994	1.67276	1.55397	0.635955	8.49e-15	7.09e-14
P14136	GFAP	Glial fibrillary acidic protein	0.991009	2.14138	0.46279	-1.11157	9.09e-15	7.53e-14
Q9NSC7	ST6GALNAC1	Alpha-N-acetylgalactosaminide alpha-2,6-sialyltransferase 1	2.01745	4.4139	0.457068	-1.12952	9.52e-15	7.87e-14
Q9GZY8	MFF	Mitochondrial fission factor	0.437073	0.626326	0.697836	-0.519039	9.96e-15	8.18e-14
P0CG41	CTAGE8	cTAGE family member 8	0.674943	0.432087	1.56205	0.643443	1.02e-14	8.36e-14
Q8NI77	KIF18A	Kinesin-like protein KIF18A	0.24972	0.137614	1.81465	0.859688	1.04e-14	8.51e-14
Q6IQ22	RAB12	Ras-related protein Rab-12	0.509733	0.792524	0.643177	-0.636713	1.07e-14	8.7e-14
Q13557	CAMK2D	Calcium/calmodulin-dependent protein kinase type II subunit delta	1.67727	2.43403	0.689093	-0.537229	1.09e-14	8.87e-14
Q5THK1	PRR14L	Protein PRR14L	0.686519	0.48362	1.41954	0.505425	1.09e-14	8.87e-14
P36021	SLC16A2	Monocarboxylate transporter 8	1.28584	2.04298	0.629393	-0.667966	1.12e-14	9.05e-14
Q7L4P6	BEND5	BEN domain-containing protein 5	0.858781	1.42609	0.602191	-0.731706	1.14e-14	9.24e-14
Q8NEN9	PDZD8	PDZ domain-containing protein 8	0.993639	1.45174	0.684446	-0.546991	1.17e-14	9.41e-14
P12532	CKMT1A	Creatine kinase U-type, mitochondrial	3.85955	1.57783	2.44612	1.29049	1.17e-14	9.41e-14
Q92529	SHC3	SHC-transforming protein 3	1.31856	2.10634	0.625999	-0.675768	1.2e-14	9.6e-14
Q709C8	VPS13C	Vacuolar protein sorting-associated protein 13C	1.51215	0.974649	1.55148	0.633649	1.2e-14	9.6e-14
P12036	NEFH	Neurofilament heavy polypeptide	0.298798	0.639836	0.466991	-1.09853	1.22e-14	9.79e-14
Q8TEY7	USP33	Ubiquitin carboxyl-terminal hydrolase 33	1.39163	0.937627	1.4842	0.569687	1.25e-14	9.97e-14
Q6FI81	CIAPIN1	Anamorsin	0.39643	0.252783	1.56826	0.649166	1.25e-14	9.97e-14
P23381	WARS	Tryptophan--tRNA ligase, cytoplasmic	7.37162	2.61969	2.81393	1.49258	1.25e-14	9.97e-14
Q9BZF9	UACA	Uveal autoantigen with coiled-coil domains and ankyrin repeats	0.780809	1.41631	0.551297	-0.8591	1.37e-14	1.09e-13
B7ZBB8	PPP1R3G	Protein phosphatase 1 regulatory subunit 3G	4.16978	10.7199	0.388974	-1.36225	1.4e-14	1.11e-13
Q9UKV0	HDAC9	Histone deacetylase 9	0.975622	1.73601	0.561992	-0.831379	1.4e-14	1.11e-13
P17302	GJA1	Gap junction alpha-1 protein	0.519223	0.801137	0.648108	-0.625695	1.5e-14	1.18e-13
O95471	CLDN7	Claudin-7	2.44546	1.54631	1.58148	0.661279	1.5e-14	1.18e-13
Q8TE04	PANK1	Pantothenate kinase 1	0.511959	0.292881	1.74801	0.805713	1.5e-14	1.18e-13
Q92530	PSMF1	Proteasome inhibitor PI31 subunit	1.03525	2.09523	0.494098	-1.01713	1.61e-14	1.26e-13
Q9NVM6	DNAJC17	DnaJ homolog subfamily C member 17	0.846085	0.529212	1.59877	0.676958	1.64e-14	1.28e-13
Q99584	S100A13	Protein S100-A13	1.58429	5.31417	0.298125	-1.74601	1.72e-14	1.33e-13
Q13188	STK3	Serine/threonine-protein kinase 3	1.81967	2.67022	0.681468	-0.553282	1.72e-14	1.33e-13
Q9NZ09	UBAP1	Ubiquitin-associated protein 1	0.588173	1.0552	0.557405	-0.843202	1.76e-14	1.36e-13
O95073	FSBP	Fibrinogen silencer-binding protein	0.571591	1.1043	0.517606	-0.950074	1.8e-14	1.39e-13
Q86T03	PIP4P1	Type 1 phosphatidylinositol 4,5-bisphosphate 4-phosphatase	1.74531	3.05044	0.57215	-0.805535	1.88e-14	1.44e-13
Q5JWF2	GNAS	Guanine nucleotide-binding protein G(s) subunit alpha isoforms XLas	0.872458	1.33357	0.654228	-0.612134	1.88e-14	1.44e-13
Q9Y5B9	SUPT16H	FACT complex subunit SPT16	1.29002	0.700245	1.84225	0.881467	1.88e-14	1.44e-13
Q8IXS6	PALM2	Paralemmin-2	0.325271	0.749251	0.434128	-1.20381	1.92e-14	1.47e-13
Q8NI35	PATJ	InaD-like protein	1.89093	1.28095	1.4762	0.561885	1.97e-14	1.5e-13
O75132	ZBED4	Zinc finger BED domain-containing protein 4	0.899775	0.4097	2.19618	1.135	2.01e-14	1.53e-13
Q96JQ0	DCHS1	Protocadherin-16	0.876572	1.27662	0.686638	-0.542379	2.06e-14	1.56e-13
Q14562	DHX8	ATP-dependent RNA helicase DHX8	1.08331	0.765242	1.41564	0.501456	2.06e-14	1.56e-13
Q16363	LAMA4	Laminin subunit alpha-4	4.12155	12.7344	0.323655	-1.62747	2.11e-14	1.59e-13
Q9Y2D5	AKAP2	A-kinase anchor protein 2	0.637072	0.905395	0.70364	-0.507091	2.11e-14	1.59e-13
Q13506	NAB1	NGFI-A-binding protein 1	0.975553	0.685488	1.42315	0.509088	2.11e-14	1.59e-13
P24001	IL32	Interleukin-32	2.84834	1.77355	1.60601	0.683483	2.15e-14	1.62e-13
Q9P266	JCAD	Junctional protein associated with coronary artery disease	0.901153	1.27849	0.704857	-0.504598	2.25e-14	1.68e-13
P78346	RPP30	Ribonuclease P protein subunit p30	0.596851	0.418304	1.42684	0.512821	2.25e-14	1.68e-13
Q6ZU35	CRAD	Cancer-related regulator of actin dynamics	0.467935	0.921088	0.508024	-0.977032	2.31e-14	1.72e-13
Q5VY43	PEAR1	Platelet endothelial aggregation receptor 1	0.937396	1.84264	0.508724	-0.975044	2.36e-14	1.75e-13
Q9UPR5	SLC8A2	Sodium/calcium exchanger 2	0.823617	2.27861	0.361456	-1.46811	2.41e-14	1.78e-13
Q03701	CEBPZ	CCAAT/enhancer-binding protein zeta	0.619988	0.432876	1.43225	0.518288	2.41e-14	1.78e-13
O76024	WFS1	Wolframin	0.739043	1.21469	0.608421	-0.716857	2.47e-14	1.82e-13
Q8N111	CEND1	Cell cycle exit and neuronal differentiation protein 1	1.03583	2.57986	0.401506	-1.31651	2.52e-14	1.86e-13
Q9HCM1	RESF1	Retroelement silencing factor 1	2.25561	1.08027	2.08801	1.06213	2.64e-14	1.94e-13
P31689	DNAJA1	DnaJ homolog subfamily A member 1	0.733285	0.490677	1.49443	0.5796	2.76e-14	2.02e-13
Q96B18	DACT3	Dapper homolog 3	1.16364	1.80405	0.645018	-0.632588	2.82e-14	2.07e-13
P52565	ARHGDIA	Rho GDP-dissociation inhibitor 1	2.1623	3.27312	0.660625	-0.598097	2.89e-14	2.11e-13
Q9H3H3	C11orf68	UPF0696 protein C11orf68	0.845326	1.34348	0.629207	-0.668395	2.95e-14	2.15e-13
Q9NZN5	ARHGEF12	Rho guanine nucleotide exchange factor 12	1.18812	1.72535	0.688625	-0.538209	2.95e-14	2.15e-13
P10451	SPP1	Osteopontin	1.44805	0.976281	1.48323	0.568745	2.95e-14	2.15e-13
Q9NRW1	RAB6B	Ras-related protein Rab-6B	2.01067	1.05844	1.89965	0.925733	2.95e-14	2.15e-13
Q6ZW31	SYDE1	Rho GTPase-activating protein SYDE1	0.513502	0.842811	0.609272	-0.714841	3.02e-14	2.18e-13
O14980	XPO1	Exportin-1	0.757843	1.08373	0.699294	-0.51603	3.02e-14	2.18e-13
P39880	CUX1	Homeobox protein cut-like 1	0.706929	0.414648	1.70489	0.769679	3.02e-14	2.18e-13
Q9Y4F1	FARP1	FERM, ARHGEF and pleckstrin domain-containing protein 1	1.00674	1.50081	0.670803	-0.576039	3.09e-14	2.23e-13
Q03112	MECOM	Histone-lysine N-methyltransferase MECOM	0.736053	0.421228	1.7474	0.805209	3.09e-14	2.23e-13
P55265	ADAR	Double-stranded RNA-specific adenosine deaminase	1.5782	1.02157	1.54488	0.627496	3.16e-14	2.28e-13
Q86UU1	PHLDB1	Pleckstrin homology-like domain family B member 1	0.492979	0.73985	0.666323	-0.585707	3.23e-14	2.31e-13
O75182	SIN3B	Paired amphipathic helix protein Sin3b	1.37033	0.959139	1.4287	0.514708	3.23e-14	2.31e-13
Q9BQ67	GRWD1	Glutamate-rich WD repeat-containing protein 1	0.69816	0.485229	1.43882	0.524891	3.23e-14	2.31e-13
Q8IZT6	ASPM	Abnormal spindle-like microcephaly-associated protein	0.60975	0.383459	1.59013	0.669147	3.23e-14	2.31e-13
Q8IYJ0	PIANP	PILR alpha-associated neural protein	0.508587	1.14775	0.443118	-1.17424	3.38e-14	2.41e-13
P18858	LIG1	DNA ligase 1	0.585215	0.41319	1.41633	0.502162	3.45e-14	2.46e-13
Q9BZ68	FRMD8P1	Putative FERM domain-containing protein FRMD8P1	0.654859	1.23868	0.528673	-0.919552	3.53e-14	2.51e-13
B0I1T2	MYO1G	Unconventional myosin-Ig	4.51737	2.1441	2.10688	1.07511	3.53e-14	2.51e-13
P38936	CDKN1A	Cyclin-dependent kinase inhibitor 1	1.11806	0.50562	2.21127	1.14488	3.61e-14	2.56e-13
Q14644	RASA3	Ras GTPase-activating protein 3	1.43535	2.3818	0.602634	-0.730646	3.69e-14	2.6e-13
Q9UQL6	HDAC5	Histone deacetylase 5	1.24389	1.80438	0.689371	-0.536648	3.69e-14	2.6e-13
Q96PU5	NEDD4L	E3 ubiquitin-protein ligase NEDD4-like	0.472476	0.333018	1.41877	0.504639	3.69e-14	2.6e-13
Q14651	PLS1	Plastin-1	1.7823	1.0012	1.78017	0.832019	3.69e-14	2.6e-13
Q4L180	FILIP1L	Filamin A-interacting protein 1-like	1.60216	2.31235	0.69287	-0.529344	3.78e-14	2.65e-13
Q9HB58	SP110	Sp110 nuclear body protein	1.75342	1.21433	1.44393	0.530005	3.78e-14	2.65e-13
P78352	DLG4	Disks large homolog 4	1.35692	3.04053	0.446279	-1.16398	3.95e-14	2.77e-13
Q9UJ14	GGT7	Glutathione hydrolase 7	1.001	1.49789	0.668274	-0.581488	4.04e-14	2.83e-13
O95810	CAVIN2	Caveolae-associated protein 2	0.964618	2.12321	0.454321	-1.13822	4.13e-14	2.89e-13
O95049	TJP3	Tight junction protein ZO-3	2.23873	1.29752	1.72539	0.786924	4.32e-14	3.02e-13
Q9H0C5	BTBD1	BTB/POZ domain-containing protein 1	1.09403	1.83053	0.597654	-0.742617	4.42e-14	3.08e-13
O94986	CEP152	Centrosomal protein of 152 kDa	0.585989	0.374043	1.56664	0.64767	4.42e-14	3.08e-13
Q9Y2Z0	SUGT1	Protein SGT1 homolog	1.13448	2.97585	0.38123	-1.39127	4.72e-14	3.27e-13
Q96A49	SYAP1	Synapse-associated protein 1	0.744499	0.4245	1.75383	0.810505	4.72e-14	3.27e-13
O60292	SIPA1L3	Signal-induced proliferation-associated 1-like protein 3	1.08152	0.731719	1.47806	0.563706	4.94e-14	3.41e-13
P24864	CCNE1	G1/S-specific cyclin-E1	0.393642	0.259925	1.51445	0.598792	5.52e-14	3.8e-13
P09619	PDGFRB	Platelet-derived growth factor receptor beta	2.31226	4.86964	0.474832	-1.07451	5.64e-14	3.86e-13
Q12913	PTPRJ	Receptor-type tyrosine-protein phosphatase eta	0.0841831	0.119741	0.703044	-0.508313	5.64e-14	3.86e-13
Q8IVF2	AHNAK2	Protein AHNAK2	0.63961	1.08863	0.587536	-0.76725	5.9e-14	4.02e-13
Q9Y6R0	NUMBL	Numb-like protein	0.547178	0.79362	0.689471	-0.536438	6.16e-14	4.19e-13
Q9UBC9	SPRR3	Small proline-rich protein 3	1.21602	2.47282	0.491754	-1.02399	6.44e-14	4.36e-13
Q96QT4	TRPM7	Transient receptor potential cation channel subfamily M member 7	0.715239	1.03903	0.688374	-0.538736	6.59e-14	4.45e-13
P28906	CD34	Hematopoietic progenitor cell antigen CD34	1.17235	2.26835	0.51683	-0.95224	6.73e-14	4.54e-13
P05538	HLA-DQB2	HLA class II histocompatibility antigen, DQ beta 2 chain	0.872185	1.25401	0.695515	-0.523846	6.73e-14	4.54e-13
P07951	TPM2	Tropomyosin beta chain	1.24087	2.52253	0.491915	-1.02352	6.88e-14	4.63e-13
O14618	CCS	Copper chaperone for superoxide dismutase	0.232437	0.462856	0.50218	-0.993724	7.04e-14	4.72e-13
Q6PL18	ATAD2	ATPase family AAA domain-containing protein 2	0.504806	0.354733	1.42306	0.508997	7.36e-14	4.92e-13
Q9H7J1	PPP1R3E	Protein phosphatase 1 regulatory subunit 3E	1.73504	3.57062	0.485922	-1.0412	7.52e-14	4.99e-13
P00367	GLUD1	Glutamate dehydrogenase 1, mitochondrial	0.992554	1.44134	0.688632	-0.538195	7.52e-14	4.99e-13
Q5T1R4	HIVEP3	Transcription factor HIVEP3	1.44716	0.784858	1.84385	0.882719	7.69e-14	5.1e-13
Q6GPH4	XAF1	XIAP-associated factor 1	2.60998	1.63837	1.59303	0.671774	7.86e-14	5.2e-13
O14908	GIPC1	PDZ domain-containing protein GIPC1	1.4807	0.97856	1.51314	0.597544	8.21e-14	5.41e-13
P33981	TTK	Dual specificity protein kinase TTK	0.403475	0.215072	1.876	0.907661	8.21e-14	5.41e-13
P49908	SELENOP	Selenoprotein P	0.473915	1.25854	0.37656	-1.40905	8.4e-14	5.52e-13
Q07954	LRP1	Prolow-density lipoprotein receptor-related protein 1	1.10449	2.80689	0.393491	-1.3456	8.4e-14	5.52e-13
Q96ER3	SAAL1	Protein SAAL1	0.904212	0.553744	1.6329	0.707441	8.58e-14	5.63e-13
P61026	RAB10	Ras-related protein Rab-10	1.01467	1.52479	0.665448	-0.587602	8.97e-14	5.86e-13
Q9Y4L5	RNF115	E3 ubiquitin-protein ligase RNF115	1.266	4.37504	0.289368	-1.78902	9.58e-14	6.25e-13
Q969X0	RILPL2	RILP-like protein 2	1.83212	2.74187	0.668202	-0.581643	9.8e-14	6.37e-13
P98171	ARHGAP4	Rho GTPase-activating protein 4	4.27683	2.38802	1.79095	0.840723	9.8e-14	6.37e-13
A4D2B0	MBLAC1	Metallo-beta-lactamase domain-containing protein 1	2.14774	4.57331	0.469625	-1.09042	1.02e-13	6.62e-13
Q14693	LPIN1	Phosphatidate phosphatase LPIN1	0.551295	0.981543	0.561662	-0.832225	1.02e-13	6.62e-13
O95674	CDS2	Phosphatidate cytidylyltransferase 2	1.31209	1.93771	0.677135	-0.562485	1.05e-13	6.75e-13
Q76N32	CEP68	Centrosomal protein of 68 kDa	0.827671	1.30261	0.635394	-0.654277	1.17e-13	7.51e-13
O94769	ECM2	Extracellular matrix protein 2	1.32296	2.8841	0.458709	-1.12435	1.19e-13	7.66e-13
P48556	PSMD8	26S proteasome non-ATPase regulatory subunit 8	0.524377	0.252709	2.07502	1.05313	1.22e-13	7.82e-13
Q14847	LASP1	LIM and SH3 domain protein 1	0.517609	0.846585	0.611408	-0.709792	1.27e-13	8.16e-13
Q9BWN1	PRR14	Proline-rich protein 14	1.20761	1.77815	0.67914	-0.558218	1.3e-13	8.33e-13
Q14209	E2F2	Transcription factor E2F2	1.0641	0.695816	1.52928	0.612853	1.39e-13	8.84e-13
P78411	IRX5	Iroquois-class homeodomain protein IRX-5	1.40384	0.820391	1.71118	0.774991	1.39e-13	8.84e-13
Q68D06	SLFN13	Schlafen family member 13	1.9083	1.03818	1.83811	0.878224	1.39e-13	8.84e-13
Q8WY22	BRI3BP	BRI3-binding protein	2.69834	1.0212	2.64232	1.40181	1.39e-13	8.84e-13
O95391	SLU7	Pre-mRNA-splicing factor SLU7	0.746341	0.526183	1.41841	0.504271	1.49e-13	9.42e-13
Q99607	ELF4	ETS-related transcription factor Elf-4	1.25138	0.843204	1.48408	0.569565	1.49e-13	9.42e-13
O00167	EYA2	Eyes absent homolog 2	2.43965	1.42804	1.70838	0.772633	1.52e-13	9.61e-13
Q9Y2Q0	ATP8A1	Phospholipid-transporting ATPase IA	1.41396	2.71537	0.520725	-0.941407	1.59e-13	1e-12
Q63ZY6	NSUN5P2	Putative methyltransferase NSUN5C	1.05499	0.65822	1.60279	0.680583	1.62e-13	1.02e-12
A2A3N6	PIPSL	Putative PIP5K1A and PSMD4-like protein	0.268866	0.152438	1.76378	0.818671	1.62e-13	1.02e-12
Q9NZU5	LMCD1	LIM and cysteine-rich domains protein 1	1.15087	3.60713	0.319056	-1.64812	1.66e-13	1.04e-12
P60660	MYL6	Myosin light polypeptide 6	1.9264	3.13149	0.615171	-0.70094	1.66e-13	1.04e-12
P42229	STAT5A	Signal transducer and activator of transcription 5A	2.14354	3.51793	0.609317	-0.714736	1.73e-13	1.08e-12
O76064	RNF8	E3 ubiquitin-protein ligase RNF8	0.686365	0.462141	1.48519	0.570645	1.77e-13	1.1e-12
Q99755	PIP5K1A	Phosphatidylinositol 4-phosphate 5-kinase type-1 alpha	0.263308	0.150912	1.74478	0.803045	1.77e-13	1.1e-12
P13984	GTF2F2	General transcription factor IIF subunit 2	0.537713	0.261249	2.05824	1.04141	1.81e-13	1.13e-12
Q9BZH6	WDR11	WD repeat-containing protein 11	1.02464	1.4967	0.684601	-0.546666	1.85e-13	1.15e-12
P58340	MLF1	Myeloid leukemia factor 1	1.08086	0.598598	1.80566	0.852527	1.89e-13	1.17e-12
Q13287	NMI	N-myc-interactor	3.72011	2.04911	1.81548	0.860347	2.06e-13	1.27e-12
Q01954	BNC1	Zinc finger protein basonuclin-1	2.16371	1.12271	1.92722	0.946521	2.06e-13	1.27e-12
P78406	RAE1	mRNA export factor	0.384207	0.195821	1.96203	0.972347	2.06e-13	1.27e-12
Q8NFZ4	NLGN2	Neuroligin-2	0.915693	1.37629	0.665333	-0.587852	2.29e-13	1.41e-12
Q9Y6R9	CCDC61	Coiled-coil domain-containing protein 61	0.99587	0.687581	1.44837	0.534427	2.4e-13	1.47e-12
Q9H6K1	ILRUN	Protein ILRUN	0.429723	0.280767	1.53053	0.614032	2.45e-13	1.5e-12
Q15067	ACOX1	Peroxisomal acyl-coenzyme A oxidase 1	0.748764	0.432871	1.72976	0.790575	2.5e-13	1.53e-12
Q03188	CENPC	Centromere protein C	0.568506	0.398379	1.42705	0.513034	2.56e-13	1.57e-12
A8MVW0	FAM171A2	Protein FAM171A2	0.358798	0.542342	0.661571	-0.596033	2.61e-13	1.6e-12
P36871	PGM1	Phosphoglucomutase-1	0.623074	0.979919	0.635842	-0.653259	2.67e-13	1.63e-12
O15488	GYG2	Glycogenin-2	0.933993	1.78863	0.522183	-0.937372	2.79e-13	1.7e-12
Q9Y5E9	PCDHB14	Protocadherin beta-14	1.24993	2.39901	0.521019	-0.940591	2.85e-13	1.73e-12
P32418	SLC8A1	Sodium/calcium exchanger 1	1.89306	2.89347	0.654251	-0.612083	2.85e-13	1.73e-12
P60709	ACTB	Actin, cytoplasmic 1	1.38193	1.97678	0.69908	-0.516471	2.85e-13	1.73e-12
P63261	ACTG1	Actin, cytoplasmic 2	1.38193	1.97678	0.69908	-0.516471	2.85e-13	1.73e-12
Q9BZG1	RAB34	Ras-related protein Rab-34	0.967846	1.96572	0.492362	-1.02221	2.91e-13	1.77e-12
O43768	ENSA	Alpha-endosulfine	1.29798	0.840554	1.5442	0.626858	2.97e-13	1.8e-12
Q16630	CPSF6	Cleavage and polyadenylation specificity factor subunit 6	1.08191	4.00875	0.269886	-1.88958	3.24e-13	1.95e-12
P55040	GEM	GTP-binding protein GEM	1.19125	2.7707	0.429946	-1.21777	3.24e-13	1.95e-12
O14879	IFIT3	Interferon-induced protein with tetratricopeptide repeats 3	1.89019	0.878244	2.15224	1.10584	3.24e-13	1.95e-12
O15484	CAPN5	Calpain-5	1.50185	4.42772	0.339194	-1.55982	3.31e-13	1.99e-12
Q8TBB6	SLC7A14	Probable cationic amino acid transporter	0.91191	1.85098	0.492664	-1.02132	3.46e-13	2.07e-12
P15311	EZR	Ezrin	1.11202	0.728711	1.526	0.609759	3.46e-13	2.07e-12
Q13131	PRKAA1	5'-AMP-activated protein kinase catalytic subunit alpha-1	1.15546	1.72303	0.670598	-0.576479	3.53e-13	2.11e-12
Q8TE76	MORC4	MORC family CW-type zinc finger protein 4	0.976499	0.407943	2.39371	1.25925	3.61e-13	2.15e-12
Q8NAX2	KDF1	Keratinocyte differentiation factor 1	2.50753	1.57361	1.5935	0.672195	3.69e-13	2.2e-12
P51812	RPS6KA3	Ribosomal protein S6 kinase alpha-3	0.919117	1.38341	0.664386	-0.589905	3.77e-13	2.24e-12
Q15434	RBMS2	RNA-binding motif, single-stranded-interacting protein 2	0.22361	0.10687	2.09235	1.06513	3.85e-13	2.29e-12
P42858	HTT	Huntingtin	0.847537	1.20974	0.700592	-0.513354	4.11e-13	2.43e-12
P00387	CYB5R3	NADH-cytochrome b5 reductase 3	1.86569	3.04596	0.612511	-0.707193	4.29e-13	2.53e-12
Q8NBR6	MINDY2	Ubiquitin carboxyl-terminal hydrolase MINDY-2	1.28404	1.87208	0.685888	-0.543956	4.57e-13	2.69e-12
Q69YH5	CDCA2	Cell division cycle-associated protein 2	0.394075	0.200201	1.9684	0.977022	4.57e-13	2.69e-12
Q8NC54	KCT2	Keratinocyte-associated transmembrane protein 2	0.345943	0.201572	1.71622	0.779238	4.67e-13	2.74e-12
O75626	PRDM1	PR domain zinc finger protein 1	0.684747	0.440818	1.55336	0.635389	4.98e-13	2.91e-12
Q9ULP9	TBC1D24	TBC1 domain family member 24	1.2499	0.645886	1.93518	0.952464	5.09e-13	2.97e-12
Q9Y570	PPME1	Protein phosphatase methylesterase 1	0.937821	2.02855	0.462312	-1.11306	5.2e-13	3.03e-12
Q8NF99	ZNF397	Zinc finger protein 397	1.4851	0.857912	1.73106	0.791657	5.42e-13	3.15e-12
Q96KP1	EXOC2	Exocyst complex component 2	0.591149	1.09933	0.537737	-0.895028	5.66e-13	3.28e-12
Q9UBG3	CRNN	Cornulin	0.947822	2.19557	0.431698	-1.21191	5.78e-13	3.33e-12
A5YKK6	CNOT1	CCR4-NOT transcription complex subunit 1	0.195564	0.289959	0.674452	-0.568211	5.78e-13	3.33e-12
P69905	HBA1	Hemoglobin subunit alpha	2.63568	6.85227	0.384643	-1.37841	6.03e-13	3.47e-12
Q13601	KRR1	KRR1 small subunit processome component homolog	0.857045	0.584006	1.46753	0.553387	6.43e-13	3.69e-12
O14896	IRF6	Interferon regulatory factor 6	3.2549	1.94756	1.67127	0.740946	6.57e-13	3.76e-12
P27987	ITPKB	Inositol-trisphosphate 3-kinase B	1.32669	1.96567	0.674929	-0.567192	8.12e-13	4.62e-12
P16157	ANK1	Ankyrin-1	1.25714	2.12275	0.592222	-0.755791	8.47e-13	4.81e-12
Q53RY4	KRTCAP3	Keratinocyte-associated protein 3	2.30787	1.60038	1.44207	0.528144	8.47e-13	4.81e-12
Q05513	PRKCZ	Protein kinase C zeta type	2.36138	1.33343	1.77091	0.824488	8.47e-13	4.81e-12
Q969X1	TMBIM1	Protein lifeguard 3	0.863445	1.23379	0.699834	-0.514915	8.65e-13	4.9e-12
P05771	PRKCB	Protein kinase C beta type	2.35576	3.50886	0.671374	-0.574811	9.03e-13	5.09e-12
P45973	CBX5	Chromobox protein homolog 5	1.21416	0.84812	1.43159	0.517615	9.03e-13	5.09e-12
P32004	L1CAM	Neural cell adhesion molecule L1	0.482615	0.753588	0.640423	-0.642903	9.42e-13	5.3e-12
O60486	PLXNC1	Plexin-C1	6.11538	12.8556	0.475696	-1.07189	9.62e-13	5.39e-12
Q5T8D3	ACBD5	Acyl-CoA-binding domain-containing protein 5	1.11595	0.751975	1.48402	0.569512	9.62e-13	5.39e-12
Q9P2R7	SUCLA2	Succinate--CoA ligase [ADP-forming] subunit beta, mitochondrial	1.32432	2.0205	0.655438	-0.609468	9.82e-13	5.5e-12
Q9H165	BCL11A	B-cell lymphoma/leukemia 11A	2.6556	1.57627	1.68474	0.752523	1.05e-12	5.84e-12
O76070	SNCG	Gamma-synuclein	0.950587	1.87721	0.506382	-0.981701	1.11e-12	6.19e-12
P07101	TH	Tyrosine 3-monooxygenase	0.717426	1.78479	0.401967	-1.31485	1.14e-12	6.32e-12
Q8N1S5	SLC39A11	Zinc transporter ZIP11	4.27759	2.58757	1.65313	0.725202	1.21e-12	6.72e-12
Q9BX67	JAM3	Junctional adhesion molecule C	0.359691	1.34102	0.268223	-1.8985	1.26e-12	6.99e-12
P98160	HSPG2	Basement membrane-specific heparan sulfate proteoglycan core protein	1.59538	3.24803	0.491184	-1.02567	1.29e-12	7.12e-12
Q53EP0	FNDC3B	Fibronectin type III domain-containing protein 3B	1.38612	0.949744	1.45947	0.545441	1.29e-12	7.12e-12
Q969T3	SNX21	Sorting nexin-21	1.00647	1.82196	0.552409	-0.85619	1.35e-12	7.39e-12
Q8NFP9	NBEA	Neurobeachin	0.390499	0.641534	0.608696	-0.716206	1.35e-12	7.39e-12
Q8NC56	LEMD2	LEM domain-containing protein 2	0.724699	1.12208	0.645852	-0.630724	1.4e-12	7.68e-12
P51692	STAT5B	Signal transducer and activator of transcription 5B	1.78919	2.5398	0.704462	-0.505407	1.4e-12	7.68e-12
Q9BXA9	SALL3	Sal-like protein 3	1.26777	4.3715	0.290009	-1.78583	1.46e-12	7.98e-12
P08473	MME	Neprilysin	1.78142	3.31401	0.537542	-0.895552	1.46e-12	7.98e-12
Q8IZD0	SAMD14	Sterile alpha motif domain-containing protein 14	1.21582	2.02347	0.600856	-0.734908	1.46e-12	7.98e-12
Q16637	SMN1	Survival motor neuron protein	0.619046	0.428646	1.44419	0.530259	1.5e-12	8.14e-12
P49756	RBM25	RNA-binding protein 25	0.855748	0.599506	1.42742	0.513412	1.53e-12	8.31e-12
O94956	SLCO2B1	Solute carrier organic anion transporter family member 2B1	1.36978	2.1424	0.639365	-0.645288	1.63e-12	8.83e-12
Q96GX5	MASTL	Serine/threonine-protein kinase greatwall	0.44679	0.308809	1.44682	0.532881	1.63e-12	8.83e-12
P61619	SEC61A1	Protein transport protein Sec61 subunit alpha isoform 1	0.476061	0.695206	0.684777	-0.546294	1.7e-12	9.15e-12
Q16585	SGCB	Beta-sarcoglycan	0.898333	1.53324	0.585904	-0.771264	1.73e-12	9.31e-12
P30305	CDC25B	M-phase inducer phosphatase 2	0.708213	0.397537	1.7815	0.833094	1.73e-12	9.31e-12
Q12996	CSTF3	Cleavage stimulation factor subunit 3	1.64188	1.11252	1.47581	0.561511	1.77e-12	9.5e-12
P56962	STX17	Syntaxin-17	2.16437	1.456	1.48651	0.571934	1.8e-12	9.69e-12
O76041	NEBL	Nebulette	1.2256	2.11751	0.578794	-0.788878	1.84e-12	9.88e-12
P53621	COPA	Coatomer subunit alpha	2.28809	1.52154	1.50379	0.588607	1.88e-12	1e-11
Q96EP0	RNF31	E3 ubiquitin-protein ligase RNF31	2.17859	1.34918	1.61475	0.691312	1.88e-12	1e-11
Q9NXV2	KCTD5	BTB/POZ domain-containing protein KCTD5	1.45941	2.54542	0.573349	-0.802516	1.96e-12	1.04e-11
Q15758	SLC1A5	Neutral amino acid transporter B(0)	1.24075	0.783116	1.58437	0.663912	2e-12	1.06e-11
Q00688	FKBP3	Peptidyl-prolyl cis-trans isomerase FKBP3	1.49193	1.04141	1.43262	0.518652	2.05e-12	1.08e-11
Q01130	SRSF2	Serine/arginine-rich splicing factor 2	1.07389	0.686595	1.56408	0.645319	2.09e-12	1.11e-11
P18084	ITGB5	Integrin beta-5	0.1369	0.202461	0.676178	-0.564525	2.18e-12	1.15e-11
Q9ULP0	NDRG4	Protein NDRG4	0.916799	1.66778	0.549712	-0.863253	2.27e-12	1.2e-11
P02751	FN1	Fibronectin	2.42422	4.4119	0.549473	-0.86388	2.41e-12	1.27e-11
Q96SK2	TMEM209	Transmembrane protein 209	0.495933	0.279511	1.77429	0.827241	2.47e-12	1.29e-11
Q9H3H9	TCEAL2	Transcription elongation factor A protein-like 2	1.20246	3.54904	0.338812	-1.56144	2.52e-12	1.32e-11
P27105	STOM	Erythrocyte band 7 integral membrane protein	0.577077	1.61074	0.358267	-1.48089	2.52e-12	1.32e-11
O94875	SORBS2	Sorbin and SH3 domain-containing protein 2	0.775117	1.13562	0.682552	-0.550989	2.57e-12	1.34e-11
Q8WX93	PALLD	Palladin	1.68712	2.80033	0.602472	-0.731033	2.73e-12	1.42e-11
Q96EN8	MOCOS	Molybdenum cofactor sulfurase	0.668922	0.466849	1.43284	0.518882	3.03e-12	1.57e-11
P07741	APRT	Adenine phosphoribosyltransferase	4.40772	7.04905	0.625293	-0.677395	3.1e-12	1.6e-11
Q9HBI5	C3orf14	Uncharacterized protein C3orf14	0.148794	0.322321	0.461632	-1.11518	3.16e-12	1.63e-11
O43463	SUV39H1	Histone-lysine N-methyltransferase SUV39H1	0.4812	0.3398	1.41613	0.501949	3.16e-12	1.63e-11
Q9NPH3	IL1RAP	Interleukin-1 receptor accessory protein	1.46474	0.856346	1.71046	0.774381	3.23e-12	1.66e-11
P35321	SPRR1A	Cornifin-A	1.45556	2.39543	0.60764	-0.718712	3.29e-12	1.69e-11
Q04724	TLE1	Transducin-like enhancer protein 1	1.65196	2.52797	0.653474	-0.613798	3.29e-12	1.69e-11
Q8NFI4	ST13P5	Putative protein FAM10A5	0.383101	3.37652	0.11346	-3.13974	3.36e-12	1.72e-11
Q9BU64	CENPO	Centromere protein O	0.898231	0.609656	1.47334	0.55909	3.36e-12	1.72e-11
P98095	FBLN2	Fibulin-2	2.63726	3.89303	0.67743	-0.561857	3.43e-12	1.76e-11
Q9UM21	MGAT4A	Alpha-1,3-mannosyl-glycoprotein 4-beta-N-acetylglucosaminyltransferase A	2.80575	1.43473	1.9556	0.96761	3.43e-12	1.76e-11
Q9UKI2	CDC42EP3	Cdc42 effector protein 3	0.427775	0.661005	0.647159	-0.627809	3.8e-12	1.94e-11
Q9H3D4	TP63	Tumor protein 63	2.19645	1.49471	1.46948	0.555308	3.8e-12	1.94e-11
P52569	SLC7A2	Cationic amino acid transporter 2	0.103531	0.185948	0.556775	-0.844833	3.96e-12	2.02e-11
P13646	KRT13	Keratin, type I cytoskeletal 13	1.31996	2.34192	0.563624	-0.827195	4.05e-12	2.05e-11
Q9C0H2	TTYH3	Protein tweety homolog 3	0.297723	0.463459	0.642394	-0.638469	4.13e-12	2.09e-11
P16234	PDGFRA	Platelet-derived growth factor receptor alpha	1.77177	3.6662	0.483271	-1.0491	4.39e-12	2.22e-11
Q15393	SF3B3	Splicing factor 3B subunit 3	0.884691	0.589871	1.49981	0.584776	4.39e-12	2.22e-11
Q13946	PDE7A	High affinity cAMP-specific 3',5'-cyclic phosphodiesterase 7A	1.77153	1.09973	1.61087	0.687842	4.39e-12	2.22e-11
Q15390	MTFR1	Mitochondrial fission regulator 1	0.686499	0.383365	1.79072	0.840541	4.39e-12	2.22e-11
P35367	HRH1	Histamine H1 receptor	0.82173	1.55145	0.529653	-0.916882	4.48e-12	2.26e-11
O95210	STBD1	Starch-binding domain-containing protein 1	0.345232	0.505422	0.683056	-0.549924	4.67e-12	2.35e-11
Q14571	ITPR2	Inositol 1,4,5-trisphosphate receptor type 2	1.17406	2.27242	0.516658	-0.952719	5.17e-12	2.59e-11
Q9HDC5	JPH1	Junctophilin-1	0.719066	0.478002	1.50432	0.589108	5.17e-12	2.59e-11
P48637	GSS	Glutathione synthetase	1.88874	1.23071	1.53468	0.617938	5.17e-12	2.59e-11
Q5T5X7	BEND3	BEN domain-containing protein 3	0.883635	0.618476	1.42873	0.514732	5.39e-12	2.69e-11
P35555	FBN1	Fibrillin-1	1.58604	2.76814	0.572963	-0.803487	5.73e-12	2.85e-11
P45974	USP5	Ubiquitin carboxyl-terminal hydrolase 5	0.83953	1.25115	0.671008	-0.575598	6.09e-12	3.02e-11
Q6ZSR9	nan	Uncharacterized protein FLJ45252	0.719379	0.494045	1.4561	0.54211	6.09e-12	3.02e-11
O00327	ARNTL	Aryl hydrocarbon receptor nuclear translocator-like protein 1	0.928281	0.543683	1.70739	0.771795	6.22e-12	3.08e-11
Q9P0K1	ADAM22	Disintegrin and metalloproteinase domain-containing protein 22	0.724651	1.34676	0.538071	-0.894131	6.34e-12	3.14e-11
Q4ZG55	GREB1	Protein GREB1	1.29033	2.36854	0.54478	-0.876256	6.88e-12	3.39e-11
Q14118	DAG1	Dystroglycan	0.686637	2.43808	0.28163	-1.82813	7.31e-12	3.59e-11
Q495A1	TIGIT	T-cell immunoreceptor with Ig and ITIM domains	2.2325	1.42662	1.56489	0.646062	7.46e-12	3.66e-11
Q7Z4Q2	HEATR3	HEAT repeat-containing protein 3	0.660443	0.455868	1.44876	0.534819	8.43e-12	4.11e-11
Q13144	EIF2B5	Translation initiation factor eIF-2B subunit epsilon	1.94775	1.14705	1.69805	0.763876	8.43e-12	4.11e-11
Q8N196	SIX5	Homeobox protein SIX5	1.66318	1.10975	1.4987	0.583711	8.96e-12	4.35e-11
Q9BZL6	PRKD2	Serine/threonine-protein kinase D2	0.89099	1.30104	0.684827	-0.546188	9.14e-12	4.42e-11
Q9NSI8	SAMSN1	SAM domain-containing protein SAMSN-1	3.02027	1.83979	1.64164	0.715133	9.14e-12	4.42e-11
P34741	SDC2	Syndecan-2	0.236399	0.689845	0.342685	-1.54505	9.52e-12	4.59e-11
P55042	RRAD	GTP-binding protein RAD	1.41795	2.85763	0.496197	-1.01102	9.52e-12	4.59e-11
O95625	ZBTB11	Zinc finger and BTB domain-containing protein 11	0.804903	0.381081	2.11215	1.07872	9.71e-12	4.68e-11
Q9BUQ8	DDX23	Probable ATP-dependent RNA helicase DDX23	0.287338	0.193168	1.4875	0.57289	9.91e-12	4.77e-11
Q96HE7	ERO1A	ERO1-like protein alpha	3.07834	1.96007	1.57053	0.651249	1.05e-11	5.06e-11
Q9NYL2	MAP3K20	Mitogen-activated protein kinase kinase kinase 20	1.32265	2.59624	0.509448	-0.972992	1.07e-11	5.15e-11
Q86VZ5	SGMS1	Phosphatidylcholine:ceramide cholinephosphotransferase 1	0.494934	0.338589	1.46175	0.547701	1.07e-11	5.15e-11
P78415	IRX3	Iroquois-class homeodomain protein IRX-3	1.05563	0.647781	1.62962	0.704534	1.1e-11	5.25e-11
P42224	STAT1	Signal transducer and activator of transcription 1-alpha/beta	2.89734	1.74221	1.66302	0.733805	1.12e-11	5.35e-11
Q5HYJ3	FAM76B	Protein FAM76B	0.405997	0.240512	1.68805	0.755361	1.14e-11	5.44e-11
P06401	PGR	Progesterone receptor	0.986991	1.50028	0.657871	-0.604123	1.16e-11	5.54e-11
P08235	NR3C2	Mineralocorticoid receptor	1.37652	2.03482	0.676481	-0.563878	1.16e-11	5.54e-11
Q9H7S9	ZNF703	Zinc finger protein 703	1.822	3.78789	0.481007	-1.05587	1.24e-11	5.85e-11
Q9NR34	MAN1C1	Mannosyl-oligosaccharide 1,2-alpha-mannosidase IC	1.83974	3.52736	0.521563	-0.939087	1.24e-11	5.85e-11
Q16649	NFIL3	Nuclear factor interleukin-3-regulated protein	0.941873	0.58477	1.61067	0.687663	1.24e-11	5.85e-11
Q15287	RNPS1	RNA-binding protein with serine-rich domain 1	0.928801	0.556108	1.67018	0.740006	1.24e-11	5.85e-11
P51168	SCNN1B	Amiloride-sensitive sodium channel subunit beta	1.21989	1.77351	0.687841	-0.539853	1.29e-11	6.09e-11
P52907	CAPZA1	F-actin-capping protein subunit alpha-1	1.47776	0.973839	1.51746	0.60166	1.31e-11	6.2e-11
Q08117	TLE5	TLE family member 5	1.94215	3.34739	0.580199	-0.78538	1.37e-11	6.44e-11
Q6N021	TET2	Methylcytosine dioxygenase TET2	0.751644	0.487521	1.54177	0.624586	1.37e-11	6.44e-11
Q16891	IMMT	MICOS complex subunit MIC60	0.944202	1.55224	0.608282	-0.717187	1.42e-11	6.69e-11
Q9BQ39	DDX50	ATP-dependent RNA helicase DDX50	0.330228	0.188024	1.75631	0.812551	1.42e-11	6.69e-11
Q9UPQ4	TRIM35	Tripartite motif-containing protein 35	1.77144	1.21602	1.45675	0.542751	1.45e-11	6.82e-11
Q08495	DMTN	Dematin	1.68866	2.86088	0.590261	-0.760576	1.48e-11	6.93e-11
Q96FC7	PHYHIPL	Phytanoyl-CoA hydroxylase-interacting protein-like	1.1636	1.89919	0.612681	-0.706792	1.51e-11	7.07e-11
Q6ZUT9	DENND5B	DENN domain-containing protein 5B	0.383912	0.592196	0.648286	-0.625298	1.57e-11	7.34e-11
P35612	ADD2	Beta-adducin	0.515013	0.733	0.702609	-0.509206	1.6e-11	7.47e-11
Q6PCE3	PGM2L1	Glucose 1,6-bisphosphate synthase	1.24051	1.89296	0.655329	-0.609708	1.64e-11	7.62e-11
O94811	TPPP	Tubulin polymerization-promoting protein	1.1396	2.58255	0.44127	-1.18027	1.67e-11	7.76e-11
Q8NEF9	SRFBP1	Serum response factor-binding protein 1	0.296364	0.208731	1.41984	0.505727	1.7e-11	7.88e-11
P0DME0	SETSIP	Protein SETSIP	1.21544	0.715897	1.69778	0.763651	1.7e-11	7.88e-11
Q9P2E5	CHPF2	Chondroitin sulfate glucuronyltransferase	4.65635	2.79179	1.66788	0.738012	1.81e-11	8.35e-11
Q6ZN30	BNC2	Zinc finger protein basonuclin-2	0.555901	0.787274	0.706108	-0.502039	1.92e-11	8.84e-11
O15231	ZNF185	Zinc finger protein 185	1.39002	1.99575	0.696492	-0.521822	2.04e-11	9.36e-11
Q5QJE6	DNTTIP2	Deoxynucleotidyltransferase terminal-interacting protein 2	0.716131	0.491246	1.45778	0.543778	2.04e-11	9.36e-11
P56524	HDAC4	Histone deacetylase 4	1.5493	2.22615	0.695956	-0.522932	2.08e-11	9.5e-11
O95544	NADK	NAD kinase	0.941765	0.656853	1.43375	0.519797	2.08e-11	9.5e-11
P22466	GAL	Galanin peptides	1.03901	2.49606	0.41626	-1.26444	2.12e-11	9.67e-11
Q96QF0	RAB3IP	Rab-3A-interacting protein	2.16628	1.34676	1.60851	0.685725	2.12e-11	9.67e-11
Q9UGP8	SEC63	Translocation protein SEC63 homolog	3.32631	1.66949	1.99241	0.994513	2.25e-11	1.02e-10
O95219	SNX4	Sorting nexin-4	1.40479	2.3641	0.594216	-0.750942	2.34e-11	1.06e-10
Q53GG5	PDLIM3	PDZ and LIM domain protein 3	1.15434	2.0844	0.553799	-0.852566	2.39e-11	1.08e-10
Q14186	TFDP1	Transcription factor Dp-1	0.32875	0.202856	1.6206	0.69653	2.48e-11	1.12e-10
P33241	LSP1	Lymphocyte-specific protein 1	2.76656	1.94782	1.42033	0.506228	2.69e-11	1.21e-10
Q92729	PTPRU	Receptor-type tyrosine-protein phosphatase U	1.26205	1.85951	0.678703	-0.559149	3.34e-11	1.49e-10
O75022	LILRB3	Leukocyte immunoglobulin-like receptor subfamily B member 3	3.23312	1.79862	1.79756	0.846037	3.34e-11	1.49e-10
Q9H2M9	RAB3GAP2	Rab3 GTPase-activating protein non-catalytic subunit	0.995648	1.422	0.700172	-0.514218	3.54e-11	1.57e-10
Q15349	RPS6KA2	Ribosomal protein S6 kinase alpha-2	0.904007	1.70044	0.531632	-0.9115	3.83e-11	1.69e-10
P10586	PTPRF	Receptor-type tyrosine-protein phosphatase F	1.35	0.814172	1.65813	0.729553	3.99e-11	1.76e-10
Q9NUC0	SERTAD4	SERTA domain-containing protein 4	2.52181	4.92438	0.512108	-0.965481	4.57e-11	2e-10
Q15942	ZYX	Zyxin	0.474919	0.704672	0.673958	-0.56927	4.57e-11	2e-10
Q7Z4I7	LIMS2	LIM and senescent cell antigen-like-containing domain protein 2	0.635009	1.75716	0.361383	-1.4684	4.66e-11	2.04e-10
O95394	PGM3	Phosphoacetylglucosamine mutase	0.745726	1.07298	0.695003	-0.524909	5.24e-11	2.29e-10
Q9P2N2	ARHGAP28	Rho GTPase-activating protein 28	1.05868	1.52381	0.694759	-0.525415	5.34e-11	2.32e-10
O00501	CLDN5	Claudin-5	0.955102	2.16736	0.440675	-1.18221	5.77e-11	2.5e-10
Q9ULX6	AKAP8L	A-kinase anchor protein 8-like	1.18765	0.806835	1.47198	0.557762	5.89e-11	2.55e-10
Q9H4Z2	ZNF335	Zinc finger protein 335	1.17435	0.7972	1.4731	0.558854	5.89e-11	2.55e-10
Q01974	ROR2	Tyrosine-protein kinase transmembrane receptor ROR2	0.798177	1.80539	0.442109	-1.17753	6.36e-11	2.75e-10
Q9H9D4	ZNF408	Zinc finger protein 408	1.05844	0.720135	1.46978	0.555601	6.49e-11	2.8e-10
Q9HCU9	BRMS1	Breast cancer metastasis-suppressor 1	0.574849	0.305754	1.8801	0.91081	6.49e-11	2.8e-10
Q9NVZ3	NECAP2	Adaptin ear-binding coat-associated protein 2	0.453053	0.755595	0.599598	-0.737933	7.15e-11	3.07e-10
Q9Y4R8	TELO2	Telomere length regulation protein TEL2 homolog	1.05672	0.675593	1.56414	0.645371	7.29e-11	3.12e-10
P10809	HSPD1	60 kDa heat shock protein, mitochondrial	0.381452	0.259449	1.47024	0.556047	7.87e-11	3.37e-10
Q15326	ZMYND11	Zinc finger MYND domain-containing protein 11	1.84126	0.968725	1.9007	0.926532	8.03e-11	3.43e-10
O94888	UBXN7	UBX domain-containing protein 7	0.534085	0.853244	0.625947	-0.675889	8.18e-11	3.49e-10
Q86YR5	GPSM1	G-protein-signaling modulator 1	0.435005	0.64533	0.674081	-0.569006	8.5e-11	3.62e-10
Q86TL0	ATG4D	Cysteine protease ATG4D	0.74645	0.480035	1.55499	0.636905	9.01e-11	3.83e-10
Q9NZ20	PLA2G3	Group 3 secretory phospholipase A2	1.1118	0.660284	1.68383	0.751743	9.19e-11	3.9e-10
Q96PP8	GBP5	Guanylate-binding protein 5	2.16348	1.43622	1.50637	0.591074	9.36e-11	3.97e-10
A6NHR9	SMCHD1	Structural maintenance of chromosomes flexible hinge domain-containing protein 1	0.648392	0.37133	1.74614	0.804165	9.73e-11	4.11e-10
Q8IWF6	DENND6A	Protein DENND6A	1.69115	1.1957	1.41435	0.500144	9.92e-11	4.18e-10
Q8N2R0	OSR2	Protein odd-skipped-related 2	0.711782	1.56057	0.456104	-1.13256	1.03e-10	4.34e-10
Q9NXR1	NDE1	Nuclear distribution protein nudE homolog 1	0.223301	0.326624	0.683663	-0.548644	1.07e-10	4.5e-10
Q52LA3	LIN52	Protein lin-52 homolog	0.607995	0.308991	1.96768	0.976493	1.11e-10	4.67e-10
Q92539	LPIN2	Phosphatidate phosphatase LPIN2	0.495554	0.729922	0.678915	-0.558698	1.18e-10	4.92e-10
Q9H9A5	CNOT10	CCR4-NOT transcription complex subunit 10	0.781461	0.457892	1.70665	0.771168	1.18e-10	4.92e-10
Q99832	CCT7	T-complex protein 1 subunit eta	0.770092	1.45287	0.53005	-0.915801	1.22e-10	5.09e-10
P41214	EIF2D	Eukaryotic translation initiation factor 2D	1.03869	0.660897	1.57163	0.652266	1.25e-10	5.18e-10
P01860	IGHG3	Immunoglobulin heavy constant gamma 3	1.66902	2.73572	0.610085	-0.712918	1.27e-10	5.27e-10
P30291	WEE1	Wee1-like protein kinase	0.470055	0.331085	1.41974	0.505625	1.35e-10	5.57e-10
O15054	KDM6B	Lysine-specific demethylase 6B	0.768996	0.222219	3.46053	1.79099	1.37e-10	5.68e-10
Q92956	TNFRSF14	Tumor necrosis factor receptor superfamily member 14	0.463062	1.77027	0.261577	-1.93469	1.4e-10	5.78e-10
Q9Y210	TRPC6	Short transient receptor potential channel 6	3.45528	6.08071	0.568236	-0.815437	1.43e-10	5.88e-10
Q05193	DNM1	Dynamin-1	1.54545	2.48024	0.623107	-0.682448	1.45e-10	5.99e-10
Q8NDX6	ZNF740	Zinc finger protein 740	0.738141	0.498144	1.48178	0.567331	1.54e-10	6.32e-10
Q99623	PHB2	Prohibitin-2	2.9318	1.65521	1.77125	0.82477	1.57e-10	6.44e-10
Q01518	CAP1	Adenylyl cyclase-associated protein 1	0.443674	0.305046	1.45445	0.540476	1.6e-10	6.55e-10
Q53GA4	PHLDA2	Pleckstrin homology-like domain family A member 2	0.814284	0.548826	1.48368	0.569183	1.63e-10	6.67e-10
Q9UPY3	DICER1	Endoribonuclease Dicer	1.79552	1.13662	1.5797	0.659655	1.76e-10	7.15e-10
Q96NG3	TTC25	Tetratricopeptide repeat protein 25	0.330642	0.483986	0.683164	-0.549697	1.79e-10	7.27e-10
Q13950	RUNX2	Runt-related transcription factor 2	1.64791	1.07212	1.53705	0.620164	1.86e-10	7.54e-10
Q9NQX5	NPDC1	Neural proliferation differentiation and control protein 1	0.778204	1.12255	0.693247	-0.528558	2.05e-10	8.24e-10
Q9ULQ0	STRIP2	Striatin-interacting protein 2	0.755779	0.459235	1.64573	0.718732	2.05e-10	8.24e-10
Q8NHP6	MOSPD2	Motile sperm domain-containing protein 2	1.67476	2.72925	0.613634	-0.704549	2.08e-10	8.38e-10
P31947	SFN	14-3-3 protein sigma	2.63052	1.83815	1.43107	0.517094	2.12e-10	8.53e-10
Q5TAQ9	DCAF8	DDB1- and CUL4-associated factor 8	2.2964	3.88125	0.591666	-0.757144	2.25e-10	9.02e-10
P51608	MECP2	Methyl-CpG-binding protein 2	0.771441	1.14971	0.670987	-0.575644	2.29e-10	9.17e-10
Q9Y3A5	SBDS	Ribosome maturation protein SBDS	0.64215	2.77492	0.231412	-2.11147	2.42e-10	9.63e-10
Q9UQM7	CAMK2A	Calcium/calmodulin-dependent protein kinase type II subunit alpha	1.22489	2.30216	0.532061	-0.910337	2.42e-10	9.63e-10
Q9NRN7	AASDHPPT	L-aminoadipate-semialdehyde dehydrogenase-phosphopantetheinyl transferase	0.621394	0.421821	1.47312	0.55888	2.42e-10	9.63e-10
P08727	KRT19	Keratin, type I cytoskeletal 19	0.893025	0.534885	1.66956	0.739472	2.42e-10	9.63e-10
O00629	KPNA4	Importin subunit alpha-3	0.739476	1.10143	0.671378	-0.574803	2.57e-10	1.01e-09
P11277	SPTB	Spectrin beta chain, erythrocytic	1.39671	2.36402	0.590822	-0.759205	2.61e-10	1.03e-09
P35613	BSG	Basigin	0.293331	0.425999	0.688572	-0.538321	2.71e-10	1.07e-09
Q13243	SRSF5	Serine/arginine-rich splicing factor 5	1.80657	1.22743	1.47182	0.557606	2.77e-10	1.09e-09
Q9HC78	ZBTB20	Zinc finger and BTB domain-containing protein 20	1.26866	1.84846	0.686335	-0.543015	2.82e-10	1.11e-09
O95400	CD2BP2	CD2 antigen cytoplasmic tail-binding protein 2	0.774287	0.474833	1.63065	0.705446	2.93e-10	1.15e-09
P40123	CAP2	Adenylyl cyclase-associated protein 2	0.895084	1.50071	0.59644	-0.745552	3.04e-10	1.19e-09
P16930	FAH	Fumarylacetoacetase	1.68907	2.83286	0.59624	-0.746034	3.15e-10	1.23e-09
Q09028	RBBP4	Histone-binding protein RBBP4	2.11566	1.44603	1.46308	0.549008	3.15e-10	1.23e-09
Q9BW85	YJU2	Splicing factor YJU2	1.10458	0.770785	1.43306	0.519098	3.21e-10	1.25e-09
Q6ZRI6	C15orf39	Uncharacterized protein C15orf39	0.570163	0.361943	1.57528	0.655613	3.33e-10	1.29e-09
Q14012	CAMK1	Calcium/calmodulin-dependent protein kinase type 1	0.30939	0.612697	0.504964	-0.985747	3.46e-10	1.34e-09
O60930	RNASEH1	Ribonuclease H1	0.67468	0.471956	1.42954	0.515552	3.53e-10	1.37e-09
O00533	CHL1	Neural cell adhesion molecule L1-like protein	1.90444	3.92872	0.484747	-1.04469	3.59e-10	1.39e-09
Q05707	COL14A1	Collagen alpha-1(XIV) chain	0.463249	1.30571	0.354786	-1.49498	4.02e-10	1.55e-09
O00159	MYO1C	Unconventional myosin-Ic	0.547919	0.796446	0.687955	-0.539613	4.02e-10	1.55e-09
Q9BXY0	MAK16	Protein MAK16 homolog	0.330913	0.209522	1.57937	0.65935	4.02e-10	1.55e-09
Q9Y5P4	COL4A3BP	Collagen type IV alpha-3-binding protein	1.1158	1.64238	0.679378	-0.557713	4.17e-10	1.6e-09
Q9NV29	TMEM100	Transmembrane protein 100	1.18811	2.50498	0.474297	-1.07614	4.25e-10	1.63e-09
Q08431	MFGE8	Lactadherin	1.62331	2.40424	0.675189	-0.566637	4.25e-10	1.63e-09
Q9H1Z4	WDR13	WD repeat-containing protein 13	0.259793	0.37007	0.702009	-0.510439	4.41e-10	1.68e-09
Q5SW96	LDLRAP1	Low density lipoprotein receptor adapter protein 1	1.01646	0.648045	1.5685	0.649385	4.49e-10	1.71e-09
Q9UHX1	PUF60	Poly(U)-binding-splicing factor PUF60	1.05112	1.62203	0.648028	-0.625872	4.66e-10	1.77e-09
P26651	ZFP36	mRNA decay activator protein ZFP36	1.09802	1.64981	0.665542	-0.587397	4.66e-10	1.77e-09
Q99956	DUSP9	Dual specificity protein phosphatase 9	0.949634	0.479347	1.9811	0.9863	4.75e-10	1.8e-09
Q9H8V3	ECT2	Protein ECT2	0.510554	0.352221	1.44953	0.535582	5.02e-10	1.89e-09
Q96SN8	CDK5RAP2	CDK5 regulatory subunit-associated protein 2	0.733767	0.460449	1.59359	0.672282	6.04e-10	2.27e-09
Q92903	CDS1	Phosphatidate cytidylyltransferase 1	2.29956	1.45102	1.58479	0.664296	6.5e-10	2.42e-09
Q14195	DPYSL3	Dihydropyrimidinase-related protein 3	0.431007	0.706789	0.609809	-0.71357	6.62e-10	2.46e-09
Q5VVW2	GARNL3	GTPase-activating Rap/Ran-GAP domain-like protein 3	1.25623	2.04131	0.615405	-0.700393	6.87e-10	2.55e-09
Q9HD26	GOPC	Golgi-associated PDZ and coiled-coil motif-containing protein	1.06887	0.751351	1.42259	0.508525	6.87e-10	2.55e-09
Q86TP1	PRUNE1	Exopolyphosphatase PRUNE1	2.88909	1.84713	1.5641	0.645335	6.99e-10	2.59e-09
A1A4G5	LNP1	Leukemia NUP98 fusion partner 1	1.70915	2.99517	0.570637	-0.809356	7.25e-10	2.68e-09
O94851	MICAL2	[F-actin]-monooxygenase MICAL2	0.241901	0.630301	0.383787	-1.38162	7.81e-10	2.87e-09
P13224	GP1BB	Platelet glycoprotein Ib beta chain	2.01455	5.77133	0.349062	-1.51844	8.1e-10	2.97e-09
Q86W50	METTL16	RNA N6-adenosine-methyltransferase METTL16	0.969062	0.651495	1.48745	0.572836	8.25e-10	3.03e-09
Q68BL7	OLFML2A	Olfactomedin-like protein 2A	1.72764	2.94317	0.587001	-0.768565	9.03e-10	3.31e-09
Q9H9C1	VIPAS39	Spermatogenesis-defective protein 39 homolog	0.540392	0.367833	1.46912	0.554955	9.72e-10	3.54e-09
Q9ULL8	SHROOM4	Protein Shroom4	1.69926	3.18289	0.533873	-0.905433	1.03e-09	3.73e-09
Q9UPQ7	PDZRN3	E3 ubiquitin-protein ligase PDZRN3	1.59976	2.30984	0.692584	-0.529938	1.1e-09	3.99e-09
A2A2V5	SERTM1	Serine-rich and transmembrane domain-containing protein 1	0.744223	1.30189	0.571651	-0.806795	1.12e-09	4.06e-09
Q8TDN4	CABLES1	CDK5 and ABL1 enzyme substrate 1	0.579117	0.971101	0.59635	-0.745768	1.37e-09	4.9e-09
Q6U841	SLC4A10	Sodium-driven chloride bicarbonate exchanger	0.65641	0.452197	1.4516	0.537647	1.53e-09	5.44e-09
Q8IZH2	XRN1	5'-3' exoribonuclease 1	1.86704	1.23355	1.51355	0.597938	1.61e-09	5.73e-09
O75528	TADA3	Transcriptional adapter 3	0.678033	0.343073	1.97635	0.982837	1.61e-09	5.73e-09
Q5VXU3	CHIC1	Cysteine-rich hydrophobic domain-containing protein 1	1.04237	1.54512	0.674619	-0.567855	1.7e-09	6.02e-09
Q93045	STMN2	Stathmin-2	0.34148	0.21258	1.60636	0.683792	1.8e-09	6.33e-09
Q7Z5R6	APBB1IP	Amyloid beta A4 precursor protein-binding family B member 1-interacting protein	3.64059	2.05409	1.77236	0.825671	1.8e-09	6.33e-09
Q7L591	DOK3	Docking protein 3	5.55645	3.29251	1.6876	0.754974	1.89e-09	6.67e-09
Q15418	RPS6KA1	Ribosomal protein S6 kinase alpha-1	0.367491	0.540144	0.680358	-0.555634	2.04e-09	7.13e-09
O60669	SLC16A7	Monocarboxylate transporter 2	0.291023	0.699571	0.416002	-1.26534	2.07e-09	7.25e-09
Q5JTB6	PLAC9	Placenta-specific protein 9	1.31193	4.8206	0.27215	-1.87753	2.19e-09	7.63e-09
Q96BP3	PPWD1	Peptidylprolyl isomerase domain and WD repeat-containing protein 1	0.652271	0.439875	1.48285	0.568377	2.27e-09	7.88e-09
Q96S15	WDR24	GATOR complex protein WDR24	0.944494	1.46069	0.646607	-0.629038	2.39e-09	8.31e-09
Q86YZ3	HRNR	Hornerin	2.20147	3.98992	0.551759	-0.857889	2.61e-09	9.05e-09
P46019	PHKA2	Phosphorylase b kinase regulatory subunit alpha, liver isoform	0.964594	1.51115	0.638316	-0.647657	2.61e-09	9.05e-09
Q5TBA9	FRY	Protein furry homolog	0.857531	1.51796	0.564925	-0.823869	2.66e-09	9.2e-09
P53778	MAPK12	Mitogen-activated protein kinase 12	0.619258	0.955257	0.648264	-0.625348	2.71e-09	9.36e-09
P54219	SLC18A1	Chromaffin granule amine transporter	0.788037	1.31874	0.597569	-0.742824	2.8e-09	9.67e-09
Q5XPI4	RNF123	E3 ubiquitin-protein ligase RNF123	1.31743	1.9225	0.685269	-0.545257	3.01e-09	1.03e-08
Q9UJX5	ANAPC4	Anaphase-promoting complex subunit 4	0.649009	1.02537	0.632954	-0.659829	3.23e-09	1.1e-08
Q9NR16	CD163L1	Scavenger receptor cysteine-rich type 1 protein M160	1.86702	2.73049	0.683769	-0.548418	3.35e-09	1.14e-08
P29728	OAS2	2'-5'-oligoadenylate synthase 2	0.816845	0.355786	2.29589	1.19905	3.41e-09	1.16e-08
Q96J01	THOC3	THO complex subunit 3	0.913782	0.596744	1.53128	0.614738	3.59e-09	1.22e-08
Q9NT99	LRRC4B	Leucine-rich repeat-containing protein 4B	1.15371	1.82471	0.632272	-0.661383	3.85e-09	1.3e-08
O95999	BCL10	B-cell lymphoma/leukemia 10	1.47864	0.963382	1.53485	0.618093	3.99e-09	1.34e-08
G2XKQ0	SUMO1P1	Small ubiquitin-related modifier 5	1.65853	0.980031	1.69233	0.75901	4.06e-09	1.36e-08
Q13496	MTM1	Myotubularin	1.52332	0.972519	1.56637	0.647424	4.28e-09	1.43e-08
Q12933	TRAF2	TNF receptor-associated factor 2	2.8461	1.62258	1.75406	0.8107	5.1e-09	1.7e-08
Q14739	LBR	Delta(14)-sterol reductase LBR	0.707816	1.09055	0.649046	-0.623608	5.46e-09	1.81e-08
Q9HBD1	RC3H2	Roquin-2	0.743583	0.51071	1.45598	0.541987	5.66e-09	1.87e-08
Q14722	KCNAB1	Voltage-gated potassium channel subunit beta-1	2.97031	2.03671	1.45839	0.544376	6.39e-09	2.1e-08
Q96HS1	PGAM5	Serine/threonine-protein phosphatase PGAM5, mitochondrial	1.28612	0.83238	1.54511	0.627708	6.61e-09	2.17e-08
Q99459	CDC5L	Cell division cycle 5-like protein	0.387305	0.575545	0.672935	-0.57146	7.34e-09	2.4e-08
Q12929	EPS8	Epidermal growth factor receptor kinase substrate 8	0.676235	1.05736	0.639548	-0.644876	7.46e-09	2.44e-08
P36404	ARL2	ADP-ribosylation factor-like protein 2	0.879626	1.42768	0.616122	-0.698712	7.59e-09	2.48e-08
Q14674	ESPL1	Separin	0.71409	0.464866	1.53612	0.619291	7.59e-09	2.48e-08
Q86XA9	HEATR5A	HEAT repeat-containing protein 5A	1.923	8.24872	0.233127	-2.10081	7.73e-09	2.52e-08
P16284	PECAM1	Platelet endothelial cell adhesion molecule	1.42504	2.05351	0.693956	-0.527085	7.86e-09	2.56e-08
Q8IX90	SKA3	Spindle and kinetochore-associated protein 3	0.460699	0.293089	1.57187	0.652484	8.57e-09	2.78e-08
Q9BZC7	ABCA2	ATP-binding cassette sub-family A member 2	1.14996	1.62948	0.705723	-0.502826	8.72e-09	2.82e-08
P11166	SLC2A1	Solute carrier family 2, facilitated glucose transporter member 1	0.737092	1.4455	0.50992	-0.971656	8.87e-09	2.87e-08
Q96Q83	ALKBH3	Alpha-ketoglutarate-dependent dioxygenase alkB homolog 3	0.216705	0.318935	0.679465	-0.55753	9.02e-09	2.92e-08
Q9NTI2	ATP8A2	Phospholipid-transporting ATPase IB	0.378842	0.598015	0.6335	-0.658583	1e-08	3.21e-08
O00559	EBAG9	Receptor-binding cancer antigen expressed on SiSo cells	2.21703	1.3422	1.65179	0.724027	1.05e-08	3.38e-08
Q8IWE2	FAM114A1	Protein NOXP20	0.345661	0.639538	0.540485	-0.887673	1.19e-08	3.79e-08
Q7LDG7	RASGRP2	RAS guanyl-releasing protein 2	1.60192	2.91747	0.549078	-0.864916	1.23e-08	3.9e-08
Q2TBE0	CWF19L2	CWF19-like protein 2	0.529647	0.335178	1.5802	0.660106	1.25e-08	3.97e-08
O95678	KRT75	Keratin, type II cytoskeletal 75	3.74541	1.81031	2.06893	1.04889	1.29e-08	4.1e-08
Q14573	ITPR3	Inositol 1,4,5-trisphosphate receptor type 3	0.485695	0.734311	0.66143	-0.596339	1.36e-08	4.31e-08
P63279	UBE2I	SUMO-conjugating enzyme UBC9	0.90504	0.539199	1.67849	0.747164	1.41e-08	4.45e-08
Q76M96	CCDC80	Coiled-coil domain-containing protein 80	1.99129	3.57506	0.556995	-0.844263	1.48e-08	4.67e-08
O95263	PDE8B	High affinity cAMP-specific and IBMX-insensitive 3',5'-cyclic phosphodiesterase 8B	0.449131	0.732227	0.613377	-0.705155	1.72e-08	5.39e-08
O00231	PSMD11	26S proteasome non-ATPase regulatory subunit 11	0.319307	0.538227	0.593256	-0.753274	1.78e-08	5.56e-08
O15117	FYB1	FYN-binding protein 1	6.66916	3.61824	1.8432	0.882216	1.81e-08	5.65e-08
Q03519	TAP2	Antigen peptide transporter 2	2.79602	1.89188	1.4779	0.56355	2.04e-08	6.34e-08
Q7Z478	DHX29	ATP-dependent RNA helicase DHX29	0.584218	0.320746	1.82144	0.865076	2.04e-08	6.34e-08
P14209	CD99	CD99 antigen	0.430296	0.670638	0.641622	-0.640206	2.07e-08	6.44e-08
Q5MCW4	ZNF569	Zinc finger protein 569	0.815582	0.539628	1.51138	0.595863	2.21e-08	6.87e-08
O15553	MEFV	Pyrin	1.48344	2.36961	0.626027	-0.675703	2.25e-08	6.97e-08
Q49MG5	MAP9	Microtubule-associated protein 9	0.429354	0.672519	0.638427	-0.647406	2.25e-08	6.97e-08
Q9NXD2	MTMR10	Myotubularin-related protein 10	0.258923	0.39566	0.654406	-0.611742	2.37e-08	7.31e-08
Q9BYV9	BACH2	Transcription regulator protein BACH2	0.549647	0.378165	1.45346	0.539489	2.37e-08	7.31e-08
Q8IVI9	NOSTRIN	Nostrin	0.8358	1.33588	0.625654	-0.676563	2.49e-08	7.65e-08
Q9NTX5	ECHDC1	Ethylmalonyl-CoA decarboxylase	0.433758	0.684362	0.633813	-0.657871	2.57e-08	7.9e-08
P63000	RAC1	Ras-related C3 botulinum toxin substrate 1	0.83639	1.23707	0.676108	-0.564675	3.14e-08	9.55e-08
O95136	S1PR2	Sphingosine 1-phosphate receptor 2	0.849747	1.21697	0.698246	-0.518193	3.14e-08	9.55e-08
Q13426	XRCC4	DNA repair protein XRCC4	0.822375	0.530628	1.54981	0.632095	3.25e-08	9.85e-08
P02042	HBD	Hemoglobin subunit delta	2.13114	3.89821	0.546697	-0.871186	3.41e-08	1.03e-07
P47756	CAPZB	F-actin-capping protein subunit beta	0.66434	0.996859	0.666433	-0.585468	3.65e-08	1.1e-07
O95622	ADCY5	Adenylate cyclase type 5	0.571044	1.11021	0.514359	-0.959153	3.89e-08	1.17e-07
Q9H2S9	IKZF4	Zinc finger protein Eos	2.74603	1.74957	1.56955	0.650347	4.09e-08	1.22e-07
P51798	CLCN7	H(+)/Cl(-) exchange transporter 7	0.360046	0.204687	1.75901	0.814765	4.09e-08	1.22e-07
Q5XKE5	KRT79	Keratin, type II cytoskeletal 79	1.79026	0.968679	1.84814	0.886076	4.09e-08	1.22e-07
Q7Z3U7	MON2	Protein MON2 homolog	0.622657	1.06523	0.584526	-0.774662	4.23e-08	1.26e-07
Q86W42	THOC6	THO complex subunit 6 homolog	1.12954	0.76905	1.46874	0.554583	4.51e-08	1.34e-07
P19878	NCF2	Neutrophil cytosol factor 2	3.30868	2.02857	1.63104	0.705788	5.31e-08	1.57e-07
Q8IZR5	CMTM4	CKLF-like MARVEL transmembrane domain-containing protein 4	0.271405	0.410176	0.661679	-0.595796	5.4e-08	1.59e-07
P68871	HBB	Hemoglobin subunit beta	3.15287	6.23754	0.505467	-0.984312	5.58e-08	1.64e-07
Q702N8	XIRP1	Xin actin-binding repeat-containing protein 1	1.92766	1.29932	1.4836	0.569098	5.58e-08	1.64e-07
Q9NX55	HYPK	Huntingtin-interacting protein K	0.786687	0.463055	1.69891	0.764605	5.96e-08	1.74e-07
Q9UNY5	ZNF232	Zinc finger protein 232	0.815582	0.539628	1.51138	0.595863	6.05e-08	1.77e-07
P48552	NRIP1	Nuclear receptor-interacting protein 1	0.991971	0.65936	1.50445	0.589232	6.56e-08	1.91e-07
Q9BQL6	FERMT1	Fermitin family homolog 1	1.07789	0.494993	2.17759	1.12273	7e-08	2.02e-07
P98082	DAB2	Disabled homolog 2	0.457728	0.681663	0.671487	-0.574569	7.71e-08	2.21e-07
P00450	CP	Ceruloplasmin	0.684893	1.12959	0.606319	-0.721851	7.84e-08	2.25e-07
Q9UBS0	RPS6KB2	Ribosomal protein S6 kinase beta-2	1.10924	0.670838	1.65352	0.725538	8.23e-08	2.35e-07
Q92565	RAPGEF5	Rap guanine nucleotide exchange factor 5	1.52118	2.30928	0.658724	-0.602254	8.77e-08	2.5e-07
Q86XN7	PROSER1	Proline and serine-rich protein 1	1.0983	0.759068	1.4469	0.532969	9.06e-08	2.57e-07
P42336	PIK3CA	Phosphatidylinositol 4,5-bisphosphate 3-kinase catalytic subunit alpha isoform	0.858497	1.42932	0.600635	-0.735441	9.97e-08	2.81e-07
Q2TAZ0	ATG2A	Autophagy-related protein 2 homolog A	0.296952	0.613524	0.484011	-1.04689	1.03e-07	2.89e-07
Q9UFB7	ZBTB47	Zinc finger and BTB domain-containing protein 47	0.548764	0.798377	0.68735	-0.540884	1.05e-07	2.94e-07
Q96G03	PGM2	Phosphoglucomutase-2	1.15646	1.72484	0.670472	-0.57675	1.08e-07	3.03e-07
Q8TCB7	METTL6	Methyltransferase-like protein 6	0.506578	0.317016	1.59796	0.676228	1.08e-07	3.03e-07
Q9UGI8	TES	Testin	1.41734	2.1571	0.657056	-0.605911	1.21e-07	3.37e-07
Q86SF2	GALNT7	N-acetylgalactosaminyltransferase 7	1.27123	0.761936	1.66842	0.738482	1.29e-07	3.58e-07
P36405	ARL3	ADP-ribosylation factor-like protein 3	1.21248	2.47256	0.490375	-1.02804	1.46e-07	4.03e-07
Q6AI39	BICRAL	BRD4-interacting chromatin-remodeling complex-associated protein-like	1.12242	0.73584	1.52536	0.609149	1.51e-07	4.15e-07
P51523	ZNF84	Zinc finger protein 84	0.522168	0.367224	1.42193	0.507852	1.6e-07	4.41e-07
O15211	RGL2	Ral guanine nucleotide dissociation stimulator-like 2	0.787079	1.20164	0.655003	-0.610427	1.68e-07	4.61e-07
P48960	CD97	CD97 antigen	0.556231	0.820445	0.677962	-0.560724	1.71e-07	4.68e-07
P68371	TUBB4B	Tubulin beta-4B chain	1.67896	2.55035	0.658327	-0.603124	1.74e-07	4.75e-07
Q92633	LPAR1	Lysophosphatidic acid receptor 1	2.20495	3.53111	0.624436	-0.679375	1.91e-07	5.2e-07
Q15464	SHB	SH2 domain-containing adapter protein B	0.279645	0.427642	0.653925	-0.612804	1.94e-07	5.27e-07
Q13422	IKZF1	DNA-binding protein Ikaros	2.35609	1.65057	1.42744	0.51343	1.97e-07	5.35e-07
P54727	RAD23B	UV excision repair protein RAD23 homolog B	1.40148	2.22622	0.629534	-0.667644	2e-07	5.43e-07
P20930	FLG	Filaggrin	1.07641	1.82515	0.589767	-0.761783	2.16e-07	5.84e-07
O60516	EIF4EBP3	Eukaryotic translation initiation factor 4E-binding protein 3	1.10249	1.93246	0.570511	-0.809674	2.23e-07	6.01e-07
Q5T0F9	CC2D1B	Coiled-coil and C2 domain-containing protein 1B	1.28183	0.882087	1.45318	0.53921	2.3e-07	6.19e-07
Q9BSF0	C2orf88	Small membrane A-kinase anchor protein	1.17287	2.45812	0.477141	-1.06751	2.45e-07	6.55e-07
O15247	CLIC2	Chloride intracellular channel protein 2	2.52025	4.45999	0.56508	-0.823474	2.45e-07	6.55e-07
O76061	STC2	Stanniocalcin-2	0.710042	1.73026	0.410368	-1.28501	2.68e-07	7.15e-07
Q0D2K0	NIPAL4	Magnesium transporter NIPA4	1.54954	2.19375	0.706342	-0.50156	2.86e-07	7.56e-07
Q8NBH2	KY	Kyphoscoliosis peptidase	0.578529	0.333983	1.73221	0.792615	2.99e-07	7.91e-07
P20339	RAB5A	Ras-related protein Rab-5A	0.250514	0.406489	0.616287	-0.698326	3.04e-07	8.03e-07
Q9BYG4	PARD6G	Partitioning defective 6 homolog gamma	0.588489	1.11426	0.528143	-0.921	3.65e-07	9.53e-07
Q9BZ72	PITPNM2	Membrane-associated phosphatidylinositol transfer protein 2	0.715561	1.28169	0.558294	-0.840904	3.65e-07	9.53e-07
Q14574	DSC3	Desmocollin-3	4.37786	2.53409	1.72758	0.788756	3.65e-07	9.53e-07
Q6SZW1	SARM1	Sterile alpha and TIR motif-containing protein 1	1.90653	4.20163	0.453761	-1.14	4.13e-07	1.07e-06
Q96A00	PPP1R14A	Protein phosphatase 1 regulatory subunit 14A	0.944564	1.50175	0.628977	-0.668921	4.59e-07	1.19e-06
P07332	FES	Tyrosine-protein kinase Fes/Fps	3.31993	4.93567	0.672641	-0.572092	4.73e-07	1.22e-06
Q13336	SLC14A1	Urea transporter 1	0.749418	1.13939	0.657735	-0.604421	4.88e-07	1.25e-06
Q9H1K0	RBSN	Rabenosyn-5	0.513087	0.738098	0.695148	-0.524609	4.88e-07	1.25e-06
Q9H201	EPN3	Epsin-3	2.6149	1.25319	2.08659	1.06115	5.03e-07	1.29e-06
Q8IXM2	BAP18	Chromatin complexes subunit BAP18	0.843423	0.421117	2.00282	1.00204	5.18e-07	1.32e-06
P53671	LIMK2	LIM domain kinase 2	1.4665	0.831449	1.76379	0.818676	5.5e-07	1.4e-06
Q9NTJ4	MAN2C1	Alpha-mannosidase 2C1	1.22132	1.91135	0.638981	-0.646154	5.67e-07	1.44e-06
Q9UIV1	CNOT7	CCR4-NOT transcription complex subunit 7	0.887366	0.519003	1.70975	0.773785	5.67e-07	1.44e-06
P29350	PTPN6	Tyrosine-protein phosphatase non-receptor type 6	5.0279	3.37825	1.48832	0.57368	6.02e-07	1.53e-06
Q9NQ38	SPINK5	Serine protease inhibitor Kazal-type 5	0.686448	1.64692	0.416806	-1.26255	6.21e-07	1.57e-06
P12314	FCGR1A	High affinity immunoglobulin gamma Fc receptor I	1.25279	2.14232	0.584783	-0.774028	6.21e-07	1.57e-06
Q07912	TNK2	Activated CDC42 kinase 1	1.61491	0.88395	1.82693	0.869418	6.21e-07	1.57e-06
P48147	PREP	Prolyl endopeptidase	1.30046	1.95671	0.664613	-0.589413	6.49e-07	1.64e-06
P51648	ALDH3A2	Aldehyde dehydrogenase family 3 member A2	1.78165	1.19964	1.48516	0.570614	7.77e-07	1.94e-06
Q86V15	CASZ1	Zinc finger protein castor homolog 1	2.01152	1.31846	1.52566	0.609438	7.77e-07	1.94e-06
Q5T7B8	KIF24	Kinesin-like protein KIF24	0.552122	0.368993	1.4963	0.581395	8e-07	1.99e-06
Q9Y6X5	ENPP4	Bis(5'-adenosyl)-triphosphatase ENPP4	0.230678	0.367583	0.627553	-0.672191	8.62e-07	2.14e-06
P30626	SRI	Sorcin	0.298556	0.569985	0.523797	-0.93292	8.75e-07	2.16e-06
Q7Z4T8	GALNTL5	Inactive polypeptide N-acetylgalactosaminyltransferase-like protein 5	0.438592	0.633816	0.691986	-0.531186	9.01e-07	2.23e-06
Q7RTZ1	OVCH2	Ovochymase-2	1.07757	0.583858	1.84561	0.884097	9.15e-07	2.26e-06
Q9HCE6	ARHGEF10L	Rho guanine nucleotide exchange factor 10-like protein	0.105506	0.153139	0.688953	-0.537523	9.7e-07	2.39e-06
O75038	PLCH2	1-phosphatidylinositol 4,5-bisphosphate phosphodiesterase eta-2	3.23251	2.28033	1.41756	0.503413	1.03e-06	2.53e-06
P21731	TBXA2R	Thromboxane A2 receptor	0.456415	0.820017	0.556592	-0.845307	1.11e-06	2.71e-06
P60763	RAC3	Ras-related C3 botulinum toxin substrate 3	0.83639	1.23707	0.676108	-0.564675	1.16e-06	2.82e-06
Q8WWW8	GAB3	GRB2-associated-binding protein 3	1.86018	2.735	0.68014	-0.556097	1.16e-06	2.82e-06
Q92637	FCGR1B	High affinity immunoglobulin gamma Fc receptor IB	1.25279	2.14232	0.584783	-0.774028	1.23e-06	2.97e-06
O60759	CYTIP	Cytohesin-interacting protein	1.98157	1.34716	1.47093	0.556726	1.28e-06	3.1e-06
Q12983	BNIP3	BCL2/adenovirus E1B 19 kDa protein-interacting protein 3	0.547005	0.837677	0.653003	-0.614839	1.3e-06	3.15e-06
P15153	RAC2	Ras-related C3 botulinum toxin substrate 2	0.83639	1.23707	0.676108	-0.564675	1.4e-06	3.37e-06
Q6ZSZ6	TSHZ1	Teashirt homolog 1	1.67694	2.48794	0.674026	-0.569124	1.53e-06	3.66e-06
Q9Y624	F11R	Junctional adhesion molecule A	0.429139	0.682846	0.628456	-0.670116	1.57e-06	3.76e-06
P04843	RPN1	Dolichyl-diphosphooligosaccharide--protein glycosyltransferase subunit 1	1.53331	1.066	1.43838	0.524444	1.6e-06	3.81e-06
O75023	LILRB5	Leukocyte immunoglobulin-like receptor subfamily B member 5	1.24247	2.21915	0.559885	-0.836798	1.93e-06	4.55e-06
Q05469	LIPE	Hormone-sensitive lipase	0.490691	0.829268	0.591716	-0.757024	2.04e-06	4.8e-06
O75907	DGAT1	Diacylglycerol O-acyltransferase 1	0.971244	1.55621	0.624107	-0.680136	2.19e-06	5.14e-06
Q8N183	NDUFAF2	NADH dehydrogenase [ubiquinone] 1 alpha subcomplex assembly factor 2	0.13866	0.197724	0.701281	-0.511935	2.19e-06	5.14e-06
Q9C0J8	WDR33	pre-mRNA 3' end processing protein WDR33	0.700307	0.470035	1.4899	0.575219	2.32e-06	5.41e-06
O00566	MPHOSPH10	U3 small nucleolar ribonucleoprotein protein MPP10	0.530881	0.374367	1.41808	0.503936	2.56e-06	5.95e-06
Q9BRK3	MXRA8	Matrix remodeling-associated protein 8	1.0607	1.62292	0.653574	-0.613578	2.64e-06	6.11e-06
Q15040	JOSD1	Josephin-1	0.788453	1.14442	0.688956	-0.537515	2.71e-06	6.27e-06
P01833	PIGR	Polymeric immunoglobulin receptor	1.35566	0.913685	1.48373	0.569224	2.87e-06	6.61e-06
Q13367	AP3B2	AP-3 complex subunit beta-2	1.10407	1.68922	0.6536	-0.613521	3.04e-06	6.98e-06
Q9P241	ATP10D	Probable phospholipid-transporting ATPase VD	2.49606	3.96734	0.629153	-0.668516	3.45e-06	7.86e-06
P07359	GP1BA	Platelet glycoprotein Ib alpha chain	1.26346	2.20253	0.57364	-0.801781	3.55e-06	8.07e-06
O95786	DDX58	Probable ATP-dependent RNA helicase DDX58	1.35005	0.948837	1.42285	0.508783	3.65e-06	8.28e-06
Q9H9L4	KANSL2	KAT8 regulatory NSL complex subunit 2	0.654892	0.429036	1.52643	0.610161	3.65e-06	8.28e-06
Q96RQ1	ERGIC2	Endoplasmic reticulum-Golgi intermediate compartment protein 2	0.452157	0.746534	0.605675	-0.723383	4.02e-06	9.11e-06
Q6NY19	KANK3	KN motif and ankyrin repeat domain-containing protein 3	1.05751	1.54068	0.686393	-0.542894	4.14e-06	9.34e-06
Q1HG44	DUOXA2	Dual oxidase maturation factor 2	3.21366	1.7128	1.87626	0.907862	4.56e-06	1.03e-05
Q9BXF3	CECR2	Cat eye syndrome critical region protein 2	0.963348	0.549422	1.75338	0.810142	4.75e-06	1.07e-05
Q9BZD3	GCOM2	Putative GRINL1B complex locus protein 2	0.545769	0.800429	0.681846	-0.552483	4.89e-06	1.1e-05
P09104	ENO2	Gamma-enolase	1.11096	1.60254	0.693252	-0.528547	5.03e-06	1.13e-05
Q9NWC5	TMEM45A	Transmembrane protein 45A	2.31687	1.55479	1.49016	0.575463	5.54e-06	1.24e-05
O43175	PHGDH	D-3-phosphoglycerate dehydrogenase	1.11518	1.84831	0.603349	-0.728936	5.77e-06	1.28e-05
Q8N283	ANKRD35	Ankyrin repeat domain-containing protein 35	1.504	2.25841	0.665954	-0.586505	5.77e-06	1.28e-05
Q08881	ITK	Tyrosine-protein kinase ITK/TSK	1.83539	1.29602	1.41617	0.501997	5.77e-06	1.28e-05
O95873	C6orf47	Uncharacterized protein C6orf47	1.67396	2.7755	0.603122	-0.729479	6.09e-06	1.35e-05
P55008	AIF1	Allograft inflammatory factor 1	1.79372	1.26174	1.42162	0.507541	6.26e-06	1.39e-05
O00194	RAB27B	Ras-related protein Rab-27B	4.54123	3.18573	1.42549	0.51146	6.8e-06	1.5e-05
Q96AJ1	CLUAP1	Clusterin-associated protein 1	0.516651	0.753656	0.685526	-0.544716	6.89e-06	1.52e-05
Q8IWV1	LAX1	Lymphocyte transmembrane adapter 1	2.57092	1.75184	1.46756	0.553415	7.58e-06	1.66e-05
P53801	PTTG1IP	Pituitary tumor-transforming gene 1 protein-interacting protein	2.80555	1.91727	1.4633	0.549229	7.69e-06	1.68e-05
Q9HBR0	SLC38A10	Putative sodium-coupled neutral amino acid transporter 10	1.33848	1.90788	0.701551	-0.51138	8.23e-06	1.79e-05
P24394	IL4R	Interleukin-4 receptor subunit alpha	1.36612	1.9594	0.697215	-0.520324	8.68e-06	1.88e-05
Q9H8M2	BRD9	Bromodomain-containing protein 9	0.611493	0.880986	0.6941	-0.526784	9.42e-06	2.03e-05
P12694	BCKDHA	2-oxoisovalerate dehydrogenase subunit alpha, mitochondrial	0.77241	1.16817	0.661215	-0.596808	1.02e-05	2.2e-05
P80723	BASP1	Brain acid soluble protein 1	1.04505	1.51932	0.687836	-0.539864	1.12e-05	2.4e-05
P17152	TMEM11	Transmembrane protein 11, mitochondrial	0.733117	1.05097	0.69756	-0.519611	1.12e-05	2.4e-05
P21730	C5AR1	C5a anaphylatoxin chemotactic receptor 1	1.72385	2.56006	0.673365	-0.57054	1.2e-05	2.56e-05
O75901	RASSF9	Ras association domain-containing protein 9	0.53362	0.286857	1.86023	0.895483	1.39e-05	2.93e-05
Q9BXI6	TBC1D10A	TBC1 domain family member 10A	1.38295	0.822519	1.68136	0.749632	1.44e-05	3.05e-05
Q4VNC0	ATP13A5	Probable cation-transporting ATPase 13A5	2.80473	1.82773	1.53454	0.617807	1.5e-05	3.17e-05
Q6ZNC4	ZNF704	Zinc finger protein 704	0.593075	0.935712	0.633822	-0.657851	1.65e-05	3.45e-05
P22102	GART	Trifunctional purine biosynthetic protein adenosine-3	2.18207	1.44098	1.5143	0.598655	2.16e-05	4.48e-05
Q6ZWJ1	STXBP4	Syntaxin-binding protein 4	0.485464	0.69721	0.696295	-0.522229	2.91e-05	5.93e-05
Q9UI47	CTNNA3	Catenin alpha-3	0.859277	1.24547	0.689924	-0.535491	3.26e-05	6.61e-05
P00915	CA1	Carbonic anhydrase 1	0.61004	0.936523	0.651389	-0.61841	3.75e-05	7.52e-05
Q8TCU6	PREX1	Phosphatidylinositol 3,4,5-trisphosphate-dependent Rac exchanger 1 protein	1.27158	1.87814	0.677043	-0.562681	3.8e-05	7.61e-05
O00255	MEN1	Menin	0.714099	1.09584	0.651644	-0.617844	3.84e-05	7.7e-05
P22735	TGM1	Protein-glutamine gamma-glutamyltransferase K	1.58974	2.35815	0.674147	-0.568864	4.7e-05	9.33e-05
A6NI28	ARHGAP42	Rho GTPase-activating protein 42	2.82888	4.76821	0.59328	-0.753215	5e-05	9.91e-05
Q9BZI1	IRX2	Iroquois-class homeodomain protein IRX-2	2.96386	1.68983	1.75394	0.810597	5.66e-05	0.00011143
O14829	PPEF1	Serine/threonine-protein phosphatase with EF-hands 1	0.635764	0.384562	1.65322	0.725276	6.24e-05	0.000122177
Q9UNH7	SNX6	Sorting nexin-6	0.573443	0.983846	0.582858	-0.778783	6.64e-05	0.000129365
P34972	CNR2	Cannabinoid receptor 2	0.741042	0.497335	1.49003	0.575338	6.97e-05	0.000135391
P11387	TOP1	DNA topoisomerase 1	0.799537	0.557958	1.43297	0.519007	7.97e-05	0.000153966
Q96F46	IL17RA	Interleukin-17 receptor A	0.739322	1.06238	0.695909	-0.523029	8.57e-05	0.000165124
Q9H6S1	AZI2	5-azacytidine-induced protein 2	1.19668	0.829335	1.44294	0.529012	9.43e-05	0.000180812
Q9ULS5	TMCC3	Transmembrane and coiled-coil domain protein 3	2.31869	1.57024	1.47664	0.56232	0.000160608	0.000299569
Q9NTX7	RNF146	E3 ubiquitin-protein ligase RNF146	1.31977	2.01917	0.653622	-0.613473	0.000168255	0.000312824
Q5TEJ8	THEMIS2	Protein THEMIS2	3.49041	2.4545	1.42205	0.507969	0.000168255	0.000312824
Q5T749	KPRP	Keratinocyte proline-rich protein	1.44186	2.29194	0.6291	-0.668638	0.000172205	0.000319486
Q6P996	PDXDC1	Pyridoxal-dependent decarboxylase domain-containing protein 1	1.4611	0.920739	1.58688	0.666192	0.000172205	0.000319486
Q8WVV4	POF1B	Protein POF1B	2.75337	1.89424	1.45355	0.539581	0.000178294	0.000329845
Q8N726	CDKN2A	Tumor suppressor ARF	0.380769	0.251643	1.51313	0.597537	0.000178294	0.000329845
Q96IY1	NSL1	Kinetochore-associated protein NSL1 homolog	1.02239	0.708017	1.44402	0.530092	0.000221817	0.000405473
Q96M34	TEX55	Testis-specific expressed protein 55	2.39518	1.6497	1.45188	0.537926	0.000237515	0.000432652
P51149	RAB7A	Ras-related protein Rab-7a	0.942362	1.77923	0.529646	-0.916899	0.00027517	0.000496734
Q92688	ANP32B	Acidic leucine-rich nuclear phosphoprotein 32 family member B	0.168244	0.308912	0.544634	-0.876641	0.000287838	0.000517276
Q15651	HMGN3	High mobility group nucleosome-binding domain-containing protein 3	0.863164	1.31603	0.655886	-0.608484	0.000294375	0.000528659
Q6UXH1	CRELD2	Cysteine-rich with EGF-like domain protein 2	0.867946	0.579191	1.49855	0.583567	0.000359794	0.000640848
Q9Y597	KCTD3	BTB/POZ domain-containing protein KCTD3	0.648044	0.444651	1.45742	0.543418	0.000388726	0.000690259
Q9Y446	PKP3	Plakophilin-3	1.44878	0.9567	1.51435	0.598701	0.000443437	0.000781822
P47929	LGALS7	Galectin-7	1.26835	0.884345	1.43423	0.520276	0.000468289	0.000823412
Q9Y2I1	NISCH	Nischarin	1.99184	1.30731	1.52361	0.607493	0.000682138	0.00118112
O14531	DPYSL4	Dihydropyrimidinase-related protein 4	0.43635	0.63684	0.68518	-0.545444	0.000790741	0.00135522
O75069	TMCC2	Transmembrane and coiled-coil domains protein 2	2.31869	1.58581	1.46215	0.548088	0.00083327	0.00142437
Q9UGL9	CRCT1	Cysteine-rich C-terminal protein 1	2.83857	5.22667	0.543093	-0.880728	0.000877913	0.00149774
Q6XPR3	RPTN	Repetin	1.14163	1.84786	0.617811	-0.694764	0.000984042	0.00167223
Q12772	SREBF2	Sterol regulatory element-binding protein 2	0.79764	0.479467	1.6636	0.734305	0.00102549	0.00173927
Q6NXT1	ANKRD54	Ankyrin repeat domain-containing protein 54	0.452483	0.301028	1.50312	0.587965	0.0014931	0.00248627
O43194	GPR39	G-protein coupled receptor 39	0.33533	0.555287	0.603886	-0.727652	0.00180322	0.0029611
P31151	S100A7	Protein S100-A7	2.35271	1.44972	1.62287	0.698544	0.00180322	0.0029611
Q8N412	STPG2	Sperm-tail PG-rich repeat-containing protein 2	0.973958	1.38084	0.705335	-0.50362	0.00236913	0.00381591
Q6PJI9	WDR59	GATOR complex protein WDR59	1.12606	0.777812	1.44773	0.53379	0.00263285	0.00422243
Q7Z465	BNIPL	Bcl-2/adenovirus E1B 19 kDa-interacting protein 2-like protein	2.06207	3.26606	0.631364	-0.663456	0.00315232	0.00499715
Q8WWL2	SPIRE2	Protein spire homolog 2	0.950847	1.56815	0.606349	-0.721779	0.00390533	0.00610186
Q9H4X1	RGCC	Regulator of cell cycle RGCC	1.25092	0.834314	1.49934	0.584325	0.00390533	0.00610186
O14828	SCAMP3	Secretory carrier-associated membrane protein 3	1.23506	0.669345	1.84518	0.883765	0.00499549	0.00771278

## Sheet: Table S4C
Table S4C. The list of 4,598 DRPs.
Protein accession	Gene name	Protein description	Position	aa	Tumor	NAT	FC	Log2 FC	P value	Adjust P
P30050	RPL12	60S ribosomal protein L12	38	S	1.0135	0.202092	5.01504	2.32626	5.98628e-20	1.80209e-17
Q14566	MCM6	DNA replication licensing factor MCM6	762	S	3.45304	0.783153	4.40915	2.1405	8.07179e-20	1.80209e-17
P25205	MCM3	DNA replication licensing factor MCM3	681	S	1.76399	0.451564	3.90639	1.96584	6.49539e-20	1.80209e-17
Q96JM3	CHAMP1	Chromosome alignment-maintaining phosphoprotein 1	87	S	0.750183	0.203025	3.69502	1.88558	8.75579e-20	1.80209e-17
P25205	MCM3	DNA replication licensing factor MCM3	668	S	2.07534	0.582108	3.56522	1.83399	6.15144e-20	1.80209e-17
P17480	UBTF	Nucleolar transcription factor 1	484	S	0.624321	0.182968	3.41219	1.7707	1.21133e-19	1.80209e-17
P25205	MCM3	DNA replication licensing factor MCM3	674	T	1.29392	0.393859	3.28523	1.716	6.15144e-20	1.80209e-17
Q5VZK9	CARMIL1	F-actin-uncapping protein LRRC16A	122	S	1.24143	0.383456	3.23748	1.69487	6.15144e-20	1.80209e-17
Q6MZP7	LIN54	Protein lin-54 homolog	310	S	0.390331	0.12258	3.18428	1.67097	1.21133e-19	1.80209e-17
P25205	MCM3	DNA replication licensing factor MCM3	672	S	1.39018	0.444949	3.12435	1.64355	6.49539e-20	1.80209e-17
Q9NS73	MBIP	MAP3K12-binding inhibitory protein 1	91	S	1.18524	0.401705	2.95052	1.56097	1.14764e-19	1.80209e-17
Q9H8V3	ECT2	Protein ECT2	359	T	1.95214	0.664455	2.93796	1.55481	1.08726e-19	1.80209e-17
P49736	MCM2	DNA replication licensing factor MCM2	139	S	1.1944	0.40784	2.9286	1.55021	1.21133e-19	1.80209e-17
Q8TDB6	DTX3L	E3 ubiquitin-protein ligase DTX3L	539	S	5.68602	1.95854	2.90319	1.53764	1.17906e-19	1.80209e-17
Q8IXM2	BAP18	Chromatin complexes subunit BAP18	96	S	0.91282	0.326038	2.79973	1.48529	5.98628e-20	1.80209e-17
Q12906	ILF3	Interleukin enhancer-binding factor 3	382	S	0.816843	0.291865	2.7987	1.48476	5.98628e-20	1.80209e-17
Q53EZ4	CEP55	Centrosomal protein of 55 kDa	425	S	1.03142	0.389911	2.64526	1.40341	1.27851e-19	1.80209e-17
P49454	CENPF	Centromere protein F	2900	S	0.692046	0.265154	2.60998	1.38404	1.27851e-19	1.80209e-17
Q14839	CHD4	Chromodomain-helicase-DNA-binding protein 4	105	S	2.85714	1.16734	2.44757	1.29135	8.07179e-20	1.80209e-17
Q9NS87	KIF15	Kinesin-like protein KIF15	568	S	0.57022	0.240512	2.37085	1.24541	1.03002e-19	1.80209e-17
O75764	TCEA3	Transcription elongation factor A protein 3	115	S	2.83048	1.21825	2.32341	1.21624	9.75762e-20	1.80209e-17
O95696	BRD1	Bromodomain-containing protein 1	814	S	1.00464	0.443817	2.26365	1.17865	1.05826e-19	1.80209e-17
P49756	RBM25	RNA-binding protein 25	583	S	1.60966	0.715038	2.25114	1.17066	5.98628e-20	1.80209e-17
Q8IWS0	PHF6	PHD finger protein 6	199	S	0.982389	0.444765	2.20878	1.14325	9.75762e-20	1.80209e-17
O75400	PRPF40A	Pre-mRNA-processing factor 40 homolog A	883	S	1.8252	0.923698	1.97597	0.982564	1.05826e-19	1.80209e-17
P41229	KDM5C	Lysine-specific demethylase 5C	301	S	1.03926	0.530918	1.95747	0.968992	8.52165e-20	1.80209e-17
P41252	IARS	Isoleucine--tRNA ligase, cytoplasmic	1047	S	0.887161	0.4592	1.93197	0.950073	6.15144e-20	1.80209e-17
Q9UFC0	LRWD1	Leucine-rich repeat and WD repeat-containing protein 1	212	S	0.686353	0.370912	1.85044	0.887871	8.29371e-20	1.80209e-17
Q13547	HDAC1	Histone deacetylase 1	421	S	2.2959	1.25285	1.83255	0.873855	9.49702e-20	1.80209e-17
P21127	CDK11B	Cyclin-dependent kinase 11B	589	S	1.2154	0.720021	1.688	0.755316	1.11705e-19	1.80209e-17
Q9UQ88	CDK11A	Cyclin-dependent kinase 11A	577	S	1.2154	0.720021	1.688	0.755316	1.11705e-19	1.80209e-17
Q07157	TJP1	Tight junction protein ZO-1	297	S	1.21587	1.79727	0.676511	-0.563816	8.75579e-20	1.80209e-17
Q07157	TJP1	Tight junction protein ZO-1	300	S	1.18933	1.79179	0.663767	-0.591251	8.52165e-20	1.80209e-17
Q9HA65	TBC1D17	TBC1 domain family member 17	620	T	1.46573	2.26353	0.647541	-0.626957	9.49702e-20	1.80209e-17
P02765	AHSG	Alpha-2-HS-glycoprotein	330	S	1.10493	1.75608	0.629201	-0.668407	1.17906e-19	1.80209e-17
O75112	LDB3	LIM domain-binding protein 3	121	S	1.19636	2.07714	0.575965	-0.795947	8.99628e-20	1.80209e-17
Q01082	SPTBN1	Spectrin beta chain, non-erythrocytic 1	2195	T	1.47067	2.56125	0.574199	-0.800376	9.75762e-20	1.80209e-17
Q8NF91	SYNE1	Nesprin-1	8223	S	1.03465	1.90491	0.54315	-0.880578	1.27851e-19	1.80209e-17
Q9UMS6	SYNPO2	Synaptopodin-2	626	T	1.431	2.77229	0.516181	-0.954052	8.52165e-20	1.80209e-17
P35611	ADD1	Alpha-adducin	614	T	0.900032	1.76877	0.508845	-0.974701	1.24447e-19	1.80209e-17
P46821	MAP1B	Microtubule-associated protein 1B	992	S	0.370806	0.753291	0.492248	-1.02254	1.08726e-19	1.80209e-17
P23588	EIF4B	Eukaryotic translation initiation factor 4B	597	S	0.568593	1.17189	0.485194	-1.04337	5.98628e-20	1.80209e-17
Q01082	SPTBN1	Spectrin beta chain, non-erythrocytic 1	2128	S	1.28683	2.6632	0.48319	-1.04934	7.85574e-20	1.80209e-17
Q63HR2	TNS2	Tensin-2	1000	S	1.28885	2.67988	0.480936	-1.05608	8.52165e-20	1.80209e-17
O75112	LDB3	LIM domain-binding protein 3	123	S	1.31094	2.85252	0.459572	-1.12164	6.49539e-20	1.80209e-17
Q9UQ16	DNM3	Dynamin-3	769	S	1.33918	3.04588	0.439669	-1.18551	5.98628e-20	1.80209e-17
C9J798	RASA4B	Ras GTPase-activating protein 4B	760	S	1.18301	2.69279	0.439325	-1.18664	8.75579e-20	1.80209e-17
O43374	RASA4	Ras GTPase-activating protein 4	760	S	1.18301	2.69279	0.439325	-1.18664	8.75579e-20	1.80209e-17
O15075	DCLK1	Serine/threonine-protein kinase DCLK1	364	S	1.37715	3.184	0.432522	-1.20915	6.49539e-20	1.80209e-17
Q63HR2	TNS2	Tensin-2	825	S	1.34396	3.21496	0.418035	-1.25831	1.00253e-19	1.80209e-17
P26678	PLN	Cardiac phospholamban	16	S	1.14219	2.93745	0.388837	-1.36276	1.00253e-19	1.80209e-17
O14610	GNGT2	Guanine nucleotide-binding protein G(I)/G(S)/G(O) subunit gamma-T2	6	S	1.20508	3.11705	0.386608	-1.37106	6.85833e-20	1.80209e-17
Q63HR2	TNS2	Tensin-2	811	S	1.71721	4.47558	0.383685	-1.382	6.3211e-20	1.80209e-17
P78559	MAP1A	Microtubule-associated protein 1A	909	S	1.15772	3.03045	0.38203	-1.38824	1.14764e-19	1.80209e-17
Q01484	ANK2	Ankyrin-2	31	S	0.962019	2.59604	0.370572	-1.43218	1.27851e-19	1.80209e-17
Q01484	ANK2	Ankyrin-2	3845	S	1.34501	3.64954	0.368543	-1.44009	6.15144e-20	1.80209e-17
Q02952	AKAP12	A-kinase anchor protein 12	1116	T	0.98809	2.69744	0.366307	-1.44888	9.2433e-20	1.80209e-17
Q99536	VAT1	Synaptic vesicle membrane protein VAT-1 homolog	18	S	0.971797	2.65465	0.366074	-1.44979	5.98628e-20	1.80209e-17
Q53TN4	CYBRD1	Cytochrome b reductase 1	248	S	1.18038	3.22687	0.365798	-1.45088	8.52165e-20	1.80209e-17
Q9HBL0	TNS1	Tensin-1	912	S	1.41775	3.89629	0.363872	-1.4585	7.04725e-20	1.80209e-17
Q01484	ANK2	Ankyrin-2	34	S	1.32122	3.63697	0.363275	-1.46087	9.2433e-20	1.80209e-17
Q96MM6	HSPA12B	Heat shock 70 kDa protein 12B	42	T	1.44454	4.0009	0.361054	-1.46971	7.44065e-20	1.80209e-17
Q9HCU0	CD248	Endosialin	746	S	1.63932	4.62846	0.354183	-1.49743	9.49702e-20	1.80209e-17
P46821	MAP1B	Microtubule-associated protein 1B	1016	S	0.336931	0.960399	0.350824	-1.51118	8.99628e-20	1.80209e-17
Q96MM6	HSPA12B	Heat shock 70 kDa protein 12B	276	S	1.42333	4.12206	0.345296	-1.53409	7.44065e-20	1.80209e-17
Q01484	ANK2	Ankyrin-2	3793	S	1.16819	3.3852	0.345087	-1.53497	6.3211e-20	1.80209e-17
Q9BX66	SORBS1	Sorbin and SH3 domain-containing protein 1	242	S	1.28458	3.73377	0.344044	-1.53933	6.49539e-20	1.80209e-17
P22105	TNXB	Tenascin-X	3651	S	1.18546	3.48495	0.340166	-1.55569	9.49702e-20	1.80209e-17
P78559	MAP1A	Microtubule-associated protein 1A	1069	S	1.01082	2.98876	0.338207	-1.56402	1.24447e-19	1.80209e-17
Q07092	COL16A1	Collagen alpha-1(XVI) chain	260	S	1.45799	4.32177	0.337361	-1.56764	1.05826e-19	1.80209e-17
Q96MM6	HSPA12B	Heat shock 70 kDa protein 12B	46	S	1.8806	5.61224	0.335088	-1.57739	8.52165e-20	1.80209e-17
Q9HBL0	TNS1	Tensin-1	899	S	1.64048	4.94438	0.331788	-1.59167	9.49702e-20	1.80209e-17
Q63ZY3	KANK2	KN motif and ankyrin repeat domain-containing protein 2	19	S	1.01672	3.08094	0.330004	-1.59944	7.04725e-20	1.80209e-17
Q02952	AKAP12	A-kinase anchor protein 12	598	S	0.664856	2.02102	0.32897	-1.60397	1.03002e-19	1.80209e-17
Q63HR2	TNS2	Tensin-2	941	S	1.38462	4.36232	0.317403	-1.65561	7.04725e-20	1.80209e-17
Q9UK55	SERPINA10	Protein Z-dependent protease inhibitor	56	S	2.09928	6.62306	0.316966	-1.6576	1.24447e-19	1.80209e-17
P21333	FLNA	Filamin-A	1734	S	1.46983	4.67651	0.314301	-1.66978	1.21133e-19	1.80209e-17
P01042	KNG1	Kininogen-1	339	S	1.8885	6.05041	0.312128	-1.67979	7.44065e-20	1.80209e-17
P43121	MCAM	Cell surface glycoprotein MUC18	606	S	0.267501	0.875704	0.305469	-1.7109	1.11705e-19	1.80209e-17
Q01484	ANK2	Ankyrin-2	3947	S	1.17824	3.86312	0.304997	-1.71313	6.67442e-20	1.80209e-17
Q03135	CAV1	Caveolin-1	37	S	1.32896	4.43456	0.299682	-1.7385	5.98628e-20	1.80209e-17
Q02952	AKAP12	A-kinase anchor protein 12	283	S	1.13866	3.80494	0.299259	-1.74053	7.44065e-20	1.80209e-17
Q09666	AHNAK	Neuroblast differentiation-associated protein AHNAK	570	S	1.32274	4.42544	0.298894	-1.74229	9.75762e-20	1.80209e-17
Q63HR2	TNS2	Tensin-2	33	S	1.8491	6.2211	0.297231	-1.75035	8.99628e-20	1.80209e-17
Q63HR2	TNS2	Tensin-2	845	S	1.51788	5.10996	0.297043	-1.75126	5.98628e-20	1.80209e-17
P01042	KNG1	Kininogen-1	329	S	2.39397	8.41649	0.284438	-1.81381	9.75762e-20	1.80209e-17
Q9UBI6	GNG12	Guanine nucleotide-binding protein G(I)/G(S)/G(O) subunit gamma-12	49	S	2.40222	8.4922	0.282874	-1.82177	5.98628e-20	1.80209e-17
P01042	KNG1	Kininogen-1	275	S	2.92691	10.4781	0.279335	-1.83993	7.04725e-20	1.80209e-17
P19823	ITIH2	Inter-alpha-trypsin inhibitor heavy chain H2	60	S	3.28283	12.0681	0.272026	-1.87819	1.21133e-19	1.80209e-17
Q02952	AKAP12	A-kinase anchor protein 12	286	S	0.901527	3.3164	0.271839	-1.87918	6.49539e-20	1.80209e-17
Q01484	ANK2	Ankyrin-2	3803	T	1.09861	4.06543	0.270233	-1.88773	5.98628e-20	1.80209e-17
P02765	AHSG	Alpha-2-HS-glycoprotein	138	S	1.74293	6.4759	0.269141	-1.89356	6.85833e-20	1.80209e-17
O14558	HSPB6	Heat shock protein beta-6	16	S	1.19658	4.4533	0.268696	-1.89596	6.85833e-20	1.80209e-17
Q01484	ANK2	Ankyrin-2	3909	S	1.87091	7.04593	0.26553	-1.91305	8.29371e-20	1.80209e-17
Q01484	ANK2	Ankyrin-2	1461	S	1.36194	5.21882	0.260966	-1.93807	6.67442e-20	1.80209e-17
O43294	TGFB1I1	Transforming growth factor beta-1-induced transcript 1 protein	143	S	1.28597	5.08687	0.252802	-1.98392	8.75579e-20	1.80209e-17
P02768	ALB	Serum albumin	82	S	2.38064	9.42825	0.252501	-1.98564	7.24131e-20	1.80209e-17
Q01118	SCN7A	Sodium channel protein type 7 subunit alpha	906	S	1.0467	4.21772	0.248168	-2.01061	7.24131e-20	1.80209e-17
P01042	KNG1	Kininogen-1	332	S	2.40026	9.82664	0.244261	-2.03351	6.49539e-20	1.80209e-17
P01008	SERPINC1	Antithrombin-III	68	S	1.99212	8.25857	0.241218	-2.05159	6.49539e-20	1.80209e-17
O43294	TGFB1I1	Transforming growth factor beta-1-induced transcript 1 protein	140	S	0.84064	3.58783	0.234303	-2.09355	7.04725e-20	1.80209e-17
O43294	TGFB1I1	Transforming growth factor beta-1-induced transcript 1 protein	141	S	1.07101	4.71889	0.226962	-2.13948	1.27851e-19	1.80209e-17
Q01118	SCN7A	Sodium channel protein type 7 subunit alpha	905	S	1.09728	4.88883	0.224447	-2.15556	5.98628e-20	1.80209e-17
Q15746	MYLK	Myosin light chain kinase, smooth muscle	1852	S	1.43273	6.70945	0.213539	-2.22743	1.08726e-19	1.80209e-17
Q9NVM1	EVA1B	Protein eva-1 homolog B	71	S	1.87682	8.84232	0.212254	-2.23614	8.07179e-20	1.80209e-17
Q9UGM5	FETUB	Fetuin-B	315	S	2.68533	12.6848	0.211696	-2.23993	5.98628e-20	1.80209e-17
P21333	FLNA	Filamin-A	2336	T	0.823469	3.98525	0.206629	-2.27488	7.24131e-20	1.80209e-17
O43294	TGFB1I1	Transforming growth factor beta-1-induced transcript 1 protein	137	S	0.985086	4.88512	0.201651	-2.31007	6.49539e-20	1.80209e-17
Q06124	PTPN11	Tyrosine-protein phosphatase non-receptor type 11	546	Y	1.10092	5.58401	0.197155	-2.3426	7.64541e-20	1.80209e-17
P29536	LMOD1	Leiomodin-1	119	S	1.96943	10.0439	0.196082	-2.35047	9.49702e-20	1.80209e-17
P08648	ITGA5	Integrin alpha-5	127	S	2.90788	15.0155	0.193659	-2.36841	1.24447e-19	1.80209e-17
P13591	NCAM1	Neural cell adhesion molecule 1	798	T	1.3301	7.00025	0.190007	-2.39587	5.98628e-20	1.80209e-17
P13591	NCAM1	Neural cell adhesion molecule 1	784	S	1.1767	6.39639	0.183963	-2.44251	6.67442e-20	1.80209e-17
P13591	NCAM1	Neural cell adhesion molecule 1	780	S	1.06383	5.85998	0.181541	-2.46163	1.17906e-19	1.80209e-17
P07197	NEFM	Neurofilament medium polypeptide	837	S	1.37879	7.67086	0.179744	-2.47598	1.17906e-19	1.80209e-17
P07197	NEFM	Neurofilament medium polypeptide	615	S	1.42213	8.37622	0.169782	-2.55825	1.21133e-19	1.80209e-17
P09382	LGALS1	Galectin-1	30	S	1.02018	6.12046	0.166683	-2.58482	7.24131e-20	1.80209e-17
A6NCI8	C2orf78	Uncharacterized protein C2orf78	615	S	1.52231	9.34074	0.162975	-2.61727	5.98628e-20	1.80209e-17
P25189	MPZ	Myelin protein P0	195	S	1.32584	8.37452	0.158318	-2.6591	8.52165e-20	1.80209e-17
P07197	NEFM	Neurofilament medium polypeptide	620	S	1.39921	8.84646	0.158166	-2.66049	1.17906e-19	1.80209e-17
P14672	SLC2A4	Solute carrier family 2, facilitated glucose transporter member 4	486	T	0.873819	5.56348	0.157064	-2.67058	1.08726e-19	1.80209e-17
P22105	TNXB	Tenascin-X	581	S	1.52177	10.2995	0.147751	-2.75876	6.3211e-20	1.80209e-17
Q8N3T6	TMEM132C	Transmembrane protein 132C	557	S	1.60003	11.6133	0.137776	-2.85961	1.21133e-19	1.80209e-17
P07197	NEFM	Neurofilament medium polypeptide	628	S	1.43149	11.1915	0.127909	-2.96682	1.11705e-19	1.80209e-17
P08294	SOD3	Extracellular superoxide dismutase [Cu-Zn]	195	S	1.11619	9.57401	0.116585	-3.10054	6.49539e-20	1.80209e-17
Q15124	PGM5	Phosphoglucomutase-like protein 5	122	S	1.87761	19.7266	0.0951814	-3.39318	1.14764e-19	1.80209e-17
O14791	APOL1	Apolipoprotein L1	311	S	1.54053	3.45075	0.446433	-1.16348	1.34938e-19	1.82938e-17
P78559	MAP1A	Microtubule-associated protein 1A	896	S	1.41201	3.87989	0.363929	-1.45827	1.34938e-19	1.82938e-17
P12111	COL6A3	Collagen alpha-3(VI) chain	1783	S	1.92026	7.4492	0.25778	-1.95579	1.34938e-19	1.82938e-17
P14672	SLC2A4	Solute carrier family 2, facilitated glucose transporter member 4	488	S	0.873819	5.56348	0.157064	-2.67058	1.34938e-19	1.82938e-17
P07197	NEFM	Neurofilament medium polypeptide	633	S	1.3699	10.411	0.131581	-2.92597	1.31347e-19	1.82938e-17
Q9NQU5	PAK6	Serine/threonine-protein kinase PAK 6	616	S	3.78847	1.41553	2.67636	1.42027	1.42412e-19	1.83278e-17
Q96T37	RBM15	RNA-binding protein 15	741	S	0.953537	0.389768	2.44642	1.29067	1.42412e-19	1.83278e-17
Q8WVB6	CHTF18	Chromosome transmission fidelity protein 18 homolog	871	S	1.2593	0.581024	2.16738	1.11595	1.42412e-19	1.83278e-17
O75400	PRPF40A	Pre-mRNA-processing factor 40 homolog A	888	S	1.5611	0.847216	1.84263	0.881765	1.38625e-19	1.83278e-17
Q96CX2	KCTD12	BTB/POZ domain-containing protein KCTD12	200	S	1.32677	2.28324	0.58109	-0.783166	1.38625e-19	1.83278e-17
Q13884	SNTB1	Beta-1-syntrophin	87	S	1.42826	3.31597	0.43072	-1.21518	1.42412e-19	1.83278e-17
P07197	NEFM	Neurofilament medium polypeptide	685	S	1.476	8.17405	0.180572	-2.46935	1.42412e-19	1.83278e-17
Q12888	TP53BP1	TP53-binding protein 1	1678	S	0.553768	0.256388	2.15988	1.11095	1.54396e-19	1.86549e-17
Q969G5	CAVIN3	Caveolae-associated protein 3	166	S	1.21178	1.90091	0.637477	-0.649554	1.58609e-19	1.86549e-17
Q8N5J2	MINDY1	Ubiquitin carboxyl-terminal hydrolase MINDY-1	103	S	1.43909	2.55155	0.564006	-0.826219	1.46301e-19	1.86549e-17
Q14432	PDE3A	cGMP-inhibited 3',5'-cyclic phosphodiesterase A	408	S	0.366906	0.721095	0.508817	-0.97478	1.50295e-19	1.86549e-17
Q9BX66	SORBS1	Sorbin and SH3 domain-containing protein 1	89	S	1.60344	3.55862	0.450579	-1.15015	1.58609e-19	1.86549e-17
Q9H019	MTFR1L	Mitochondrial fission regulator 1-like	238	S	0.312212	0.707168	0.441497	-1.17953	1.50295e-19	1.86549e-17
Q05682	CALD1	Caldesmon	248	S	1.30393	4.44697	0.293219	-1.76995	1.58609e-19	1.86549e-17
Q63HR2	TNS2	Tensin-2	102	S	1.64486	5.86478	0.280465	-1.83411	1.50295e-19	1.86549e-17
P17661	DES	Desmin	28	S	1.40318	5.05656	0.277497	-1.84946	1.54396e-19	1.86549e-17
O15431	SLC31A1	High affinity copper uptake protein 1	114	T	2.30688	9.41171	0.245108	-2.02851	1.58609e-19	1.86549e-17
O15431	SLC31A1	High affinity copper uptake protein 1	119	T	2.30688	9.41171	0.245108	-2.02851	1.58609e-19	1.86549e-17
Q05682	CALD1	Caldesmon	202	S	1.31895	5.46173	0.241489	-2.04997	1.58609e-19	1.86549e-17
Q05682	CALD1	Caldesmon	219	S	1.57085	10.6863	0.146996	-2.76615	1.58609e-19	1.86549e-17
Q8WYQ5	DGCR8	Microprocessor complex subunit DGCR8	377	S	1.35434	0.894868	1.51345	0.59784	1.67377e-19	1.86957e-17
O14791	APOL1	Apolipoprotein L1	314	S	1.32	2.89867	0.45538	-1.13486	1.67377e-19	1.86957e-17
Q96PE1	ADGRA2	Adhesion G protein-coupled receptor A2	966	S	1.91193	4.65083	0.411095	-1.28246	1.67377e-19	1.86957e-17
O43294	TGFB1I1	Transforming growth factor beta-1-induced transcript 1 protein	194	S	1.23188	3.12949	0.393637	-1.34506	1.62934e-19	1.86957e-17
Q63ZY3	KANK2	KN motif and ankyrin repeat domain-containing protein 2	428	S	1.35222	4.18005	0.323495	-1.62819	1.62934e-19	1.86957e-17
P21291	CSRP1	Cysteine and glycine-rich protein 1	81	S	0.827995	2.84929	0.290597	-1.78291	1.62934e-19	1.86957e-17
Q63ZY3	KANK2	KN motif and ankyrin repeat domain-containing protein 2	540	S	0.784508	2.97705	0.263519	-1.92402	1.67377e-19	1.86957e-17
P07197	NEFM	Neurofilament medium polypeptide	680	S	1.6432	9.87756	0.166357	-2.58765	1.67377e-19	1.86957e-17
Q969G5	CAVIN3	Caveolae-associated protein 3	62	S	1.15904	2.96128	0.391398	-1.35329	1.71939e-19	1.89666e-17
Q02952	AKAP12	A-kinase anchor protein 12	483	S	1.13544	4.15851	0.27304	-1.87281	1.71939e-19	1.89666e-17
P52701	MSH6	DNA mismatch repair protein Msh6	830	S	1.45624	0.389426	3.73944	1.90282	1.86375e-19	1.90854e-17
Q01196	RUNX1	Runt-related transcription factor 1	14	T	2.25311	1.15097	1.95756	0.96906	1.96657e-19	1.90854e-17
Q13547	HDAC1	Histone deacetylase 1	423	S	2.31523	1.24336	1.86208	0.896912	1.81434e-19	1.90854e-17
O75400	PRPF40A	Pre-mRNA-processing factor 40 homolog A	885	S	1.69164	0.915073	1.84864	0.886467	1.76623e-19	1.90854e-17
Q6VMQ6	ATF7IP	Activating transcription factor 7-interacting protein 1	559	S	2.22711	1.21017	1.84032	0.879957	1.91448e-19	1.90854e-17
P49915	GMPS	GMP synthase [glutamine-hydrolyzing]	332	S	1.25921	0.760481	1.65581	0.727534	1.91448e-19	1.90854e-17
Q68E01	INTS3	Integrator complex subunit 3	502	S	1.92913	1.2112	1.59274	0.671515	1.96657e-19	1.90854e-17
Q9UHR5	SAP30BP	SAP30-binding protein	113	S	1.00974	0.63929	1.57947	0.659445	1.76623e-19	1.90854e-17
P46821	MAP1B	Microtubule-associated protein 1B	831	S	0.595383	1.3284	0.448195	-1.1578	1.96657e-19	1.90854e-17
P78559	MAP1A	Microtubule-associated protein 1A	2449	S	1.35726	3.09574	0.438428	-1.18959	1.81434e-19	1.90854e-17
P78559	MAP1A	Microtubule-associated protein 1A	644	S	1.07689	2.51269	0.42858	-1.22236	1.91448e-19	1.90854e-17
Q8NBV4	PLPP7	Inactive phospholipid phosphatase 7	62	S	0.905964	2.15279	0.420833	-1.24868	1.86375e-19	1.90854e-17
O60504	SORBS3	Vinexin	530	S	1.33742	3.23836	0.412993	-1.27581	1.91448e-19	1.90854e-17
Q9Y4G6	TLN2	Talin-2	1843	T	1.6984	4.13996	0.410244	-1.28544	1.96657e-19	1.90854e-17
Q02952	AKAP12	A-kinase anchor protein 12	696	S	1.16948	2.87867	0.406256	-1.29954	1.91448e-19	1.90854e-17
Q9H7M9	VSIR	V-type immunoglobulin domain-containing suppressor of T-cell activation	235	S	0.488605	1.34868	0.362285	-1.4648	1.96657e-19	1.90854e-17
P46821	MAP1B	Microtubule-associated protein 1B	891	S	0.763757	2.16338	0.353039	-1.5021	1.91448e-19	1.90854e-17
Q16473	TNXA	Putative tenascin-XA	139	S	1.18546	3.48495	0.340166	-1.55569	1.96657e-19	1.90854e-17
Q99708	RBBP8	DNA endonuclease RBBP8	506	S	2.10746	7.53277	0.279772	-1.83767	1.96657e-19	1.90854e-17
Q99708	RBBP8	DNA endonuclease RBBP8	512	S	2.10746	7.53277	0.279772	-1.83767	1.96657e-19	1.90854e-17
P07197	NEFM	Neurofilament medium polypeptide	667	S	1.37928	8.06475	0.171026	-2.54771	1.81434e-19	1.90854e-17
Q14315	FLNC	Filamin-C	2233	S	0.786513	5.31018	0.148114	-2.75522	1.91448e-19	1.90854e-17
Q9HBL0	TNS1	Tensin-1	860	T	1.49895	3.30299	0.453817	-1.13982	2.02007e-19	1.92884e-17
Q9HBL0	TNS1	Tensin-1	907	S	1.90129	4.29258	0.442924	-1.17487	2.02007e-19	1.92884e-17
Q63HR2	TNS2	Tensin-2	120	S	1.61641	7.2978	0.221493	-2.17467	2.02007e-19	1.92884e-17
Q5SNT2	TMEM201	Transmembrane protein 201	441	S	2.55269	1.39978	1.82364	0.86682	2.075e-19	1.93958e-17
Q09666	AHNAK	Neuroblast differentiation-associated protein AHNAK	210	S	1.25105	1.84044	0.679756	-0.556911	2.075e-19	1.93958e-17
Q96AY4	TTC28	Tetratricopeptide repeat protein 28	28	S	0.61199	1.09585	0.55846	-0.840474	2.075e-19	1.93958e-17
P27361	MAPK3	Mitogen-activated protein kinase 3	202	T	1.16608	3.29139	0.354283	-1.49703	2.075e-19	1.93958e-17
Q9H0H5	RACGAP1	Rac GTPase-activating protein 1	342	T	0.515097	0.175243	2.93933	1.55549	2.18934e-19	1.98701e-17
O14578	CIT	Citron Rho-interacting kinase	440	S	0.763554	0.411632	1.85495	0.891377	2.24882e-19	1.98701e-17
Q9NR30	DDX21	Nucleolar RNA helicase 2	121	S	0.469913	0.283696	1.65639	0.728046	2.24882e-19	1.98701e-17
P02671	FGA	Fibrinogen alpha chain	485	S	1.14763	2.13548	0.537409	-0.895906	2.24882e-19	1.98701e-17
Q9HBL0	TNS1	Tensin-1	963	S	1.28434	2.455	0.523152	-0.934697	2.18934e-19	1.98701e-17
Q96MM6	HSPA12B	Heat shock 70 kDa protein 12B	25	S	1.46171	2.92967	0.498933	-1.00308	2.18934e-19	1.98701e-17
O14950	MYL12B	Myosin regulatory light chain 12B	20	S	0.0724422	0.150118	0.482568	-1.0512	2.24882e-19	1.98701e-17
P19105	MYL12A	Myosin regulatory light chain 12A	19	S	0.0724422	0.150118	0.482568	-1.0512	2.24882e-19	1.98701e-17
P24844	MYL9	Myosin regulatory light polypeptide 9	20	S	0.0724422	0.150118	0.482568	-1.0512	2.24882e-19	1.98701e-17
P37173	TGFBR2	TGF-beta receptor type-2	553	S	1.86837	3.89824	0.479286	-1.06104	2.24882e-19	1.98701e-17
P46821	MAP1B	Microtubule-associated protein 1B	995	S	0.479708	1.00839	0.475716	-1.07183	2.18934e-19	1.98701e-17
Q9NQX5	NPDC1	Neural proliferation differentiation and control protein 1	229	S	1.04686	3.23687	0.323419	-1.62852	2.30989e-19	2.03088e-17
O43395	PRPF3	U4/U6 small nuclear ribonucleoprotein Prp3	619	S	1.56091	0.888066	1.75765	0.813651	2.37261e-19	2.03563e-17
Q09666	AHNAK	Neuroblast differentiation-associated protein AHNAK	216	S	1.42017	2.0209	0.702739	-0.50894	2.37261e-19	2.03563e-17
O43491	EPB41L2	Band 4.1-like protein 2	499	S	1.59664	3.33275	0.479076	-1.06167	2.37261e-19	2.03563e-17
Q63HR2	TNS2	Tensin-2	931	S	1.6112	5.45954	0.295116	-1.76064	2.37261e-19	2.03563e-17
P35749	MYH11	Myosin-11	1954	S	1.48519	5.53621	0.268269	-1.89825	2.37261e-19	2.03563e-17
Q9UMS6	SYNPO2	Synaptopodin-2	611	S	1.25751	2.40587	0.522682	-0.935996	2.437e-19	2.08082e-17
Q9Y4F1	FARP1	FERM, ARHGEF and pleckstrin domain-containing protein 1	24	T	0.881334	1.53896	0.572681	-0.804197	2.50312e-19	2.1069e-17
Q9NZN4	EHD2	EH domain-containing protein 2	438	S	1.60122	3.65713	0.437837	-1.19154	2.50312e-19	2.1069e-17
P21333	FLNA	Filamin-A	2152	S	0.75691	3.62638	0.208723	-2.26034	2.50312e-19	2.1069e-17
Q7Z3J3	RGPD4	RanBP2-like and GRIP domain-containing protein 4	797	S	0.482048	0.21062	2.28871	1.19453	2.57102e-19	2.14372e-17
P04114	APOB	Apolipoprotein B-100	4048	S	2.67051	8.95321	0.298274	-1.74529	2.57102e-19	2.14372e-17
Q14515	SPARCL1	SPARC-like protein 1	414	S	2.27271	6.91636	0.328598	-1.6056	2.64073e-19	2.16126e-17
Q01484	ANK2	Ankyrin-2	3797	T	1.42497	5.13375	0.277569	-1.84908	2.64073e-19	2.16126e-17
P29536	LMOD1	Leiomodin-1	85	S	1.44536	5.55243	0.260311	-1.94169	2.64073e-19	2.16126e-17
Q15746	MYLK	Myosin light chain kinase, smooth muscle	1773	S	1.71703	7.75389	0.221442	-2.175	2.64073e-19	2.16126e-17
P49454	CENPF	Centromere protein F	2911	S	0.450172	0.177243	2.53986	1.34475	2.78581e-19	2.17956e-17
P04183	TK1	Thymidine kinase, cytosolic	13	S	1.0991	0.462326	2.37733	1.24934	2.71231e-19	2.17956e-17
P85037	FOXK1	Forkhead box protein K1	223	S	0.633046	0.316935	1.9974	0.998126	2.78581e-19	2.17956e-17
Q14839	CHD4	Chromodomain-helicase-DNA-binding protein 4	1570	S	1.29424	0.788315	1.64178	0.715259	2.78581e-19	2.17956e-17
Q9BZQ8	NIBAN1	Protein Niban 1	646	S	1.03867	1.86627	0.556548	-0.845422	2.71231e-19	2.17956e-17
Q9C0E8	LNPK	Endoplasmic reticulum junction formation protein lunapark	194	S	1.47202	2.8157	0.522789	-0.935699	2.78581e-19	2.17956e-17
P09972	ALDOC	Fructose-bisphosphate aldolase C	39	S	1.97268	4.42908	0.445393	-1.16685	2.78581e-19	2.17956e-17
P46821	MAP1B	Microtubule-associated protein 1B	1797	S	0.269872	0.643161	0.419602	-1.25291	2.71231e-19	2.17956e-17
Q02952	AKAP12	A-kinase anchor protein 12	629	S	1.11135	2.7924	0.397992	-1.32919	2.71231e-19	2.17956e-17
Q9H8Y8	GORASP2	Golgi reassembly-stacking protein 2	222	T	0.440017	1.50902	0.291592	-1.77798	2.78581e-19	2.17956e-17
Q6MZP7	LIN54	Protein lin-54 homolog	635	S	0.829596	0.441292	1.87993	0.910675	2.86127e-19	2.21905e-17
O95425	SVIL	Supervillin	547	S	0.979346	3.79643	0.257965	-1.95475	2.86127e-19	2.21905e-17
Q5THJ4	VPS13D	Vacuolar protein sorting-associated protein 13D	2692	S	1.04094	0.305841	3.40352	1.76703	2.93875e-19	2.26923e-17
Q02952	AKAP12	A-kinase anchor protein 12	627	S	1.08478	2.79389	0.388268	-1.36488	3.01831e-19	2.32057e-17
Q8WXE0	CASKIN2	Caskin-2	700	S	0.901201	1.7503	0.514885	-0.957678	3.09999e-19	2.3731e-17
Q9HBL0	TNS1	Tensin-1	1269	S	1.42507	3.67748	0.387513	-1.36769	3.18386e-19	2.42684e-17
Q5UIP0	RIF1	Telomere-associated protein RIF1	782	S	0.76084	0.384669	1.97791	0.983976	3.26996e-19	2.48182e-17
Q12906	ILF3	Interleukin enhancer-binding factor 3	384	S	0.938292	0.261344	3.59025	1.84409	3.35837e-19	2.49559e-17
P29590	PML	Protein PML	8	S	1.93497	1.20511	1.60564	0.68315	3.35837e-19	2.49559e-17
Q63HR2	TNS2	Tensin-2	1003	S	1.04035	2.4255	0.42892	-1.22122	3.35837e-19	2.49559e-17
Q9Y534	CSDC2	Cold shock domain-containing protein C2	58	S	0.500068	2.87351	0.174027	-2.52262	3.35837e-19	2.49559e-17
P23327	HRC	Sarcoplasmic reticulum histidine-rich calcium-binding protein	358	S	2.27241	13.598	0.167113	-2.5811	3.35837e-19	2.49559e-17
Q96K76	USP47	Ubiquitin carboxyl-terminal hydrolase 47	910	S	0.821601	1.31224	0.626108	-0.675516	3.44914e-19	2.53127e-17
Q63HR2	TNS2	Tensin-2	991	S	1.34325	2.89796	0.463518	-1.1093	3.44914e-19	2.53127e-17
Q96CV9	OPTN	Optineurin	342	S	0.496465	1.54104	0.322163	-1.63414	3.44914e-19	2.53127e-17
P14618	PKM	Pyruvate kinase PKM	37	S	1.34234	0.753412	1.78168	0.83324	3.638e-19	2.63718e-17
P27361	MAPK3	Mitogen-activated protein kinase 3	204	Y	1.243	3.05804	0.406468	-1.29879	3.638e-19	2.63718e-17
P02724	GYPA	Glycophorin-A	139	S	1.61066	4.54898	0.354071	-1.49789	3.638e-19	2.63718e-17
Q6ZWB6	KCTD8	BTB/POZ domain-containing protein KCTD8	255	S	1.31922	2.89183	0.45619	-1.13229	3.73623e-19	2.68646e-17
Q96CX2	KCTD12	BTB/POZ domain-containing protein KCTD12	256	S	1.31922	2.89183	0.45619	-1.13229	3.73623e-19	2.68646e-17
O15446	CD3EAP	DNA-directed RNA polymerase I subunit RPA34	27	S	0.563838	0.338426	1.66606	0.736439	3.83708e-19	2.72586e-17
Q02952	AKAP12	A-kinase anchor protein 12	660	S	1.50508	3.4672	0.434091	-1.20393	3.83708e-19	2.72586e-17
P10275	AR	Androgen receptor	651	S	1.28271	4.14688	0.30932	-1.69283	3.83708e-19	2.72586e-17
O43719	HTATSF1	HIV Tat-specific factor 1	494	S	0.745655	0.357139	2.08785	1.06202	3.94062e-19	2.76622e-17
O60565	GREM1	Gremlin-1	77	S	1.18211	1.82594	0.647399	-0.627273	3.94062e-19	2.76622e-17
Q15746	MYLK	Myosin light chain kinase, smooth muscle	1772	S	1.47283	4.65716	0.31625	-1.66086	3.94062e-19	2.76622e-17
Q8IYB3	SRRM1	Serine/arginine repetitive matrix protein 1	220	T	0.889275	0.464605	1.91405	0.936625	4.04691e-19	2.82965e-17
Q92922	SMARCC1	SWI/SNF complex subunit SMARCC1	816	S	0.758752	0.344028	2.2055	1.1411	4.15604e-19	2.87203e-17
P98175	RBM10	RNA-binding protein 10	89	S	1.25425	0.852112	1.47193	0.557708	4.15604e-19	2.87203e-17
Q14515	SPARCL1	SPARC-like protein 1	420	S	2.16928	5.19551	0.417529	-1.26005	4.15604e-19	2.87203e-17
O15042	U2SURP	U2 snRNP-associated SURP motif-containing protein	485	S	1.12776	0.41955	2.68803	1.42655	4.26807e-19	2.91542e-17
Q14938	NFIX	Nuclear factor 1 X-type	265	S	0.883914	1.68924	0.523262	-0.934393	4.26807e-19	2.91542e-17
Q8N699	MYCT1	Myc target protein 1	149	S	1.52642	3.41025	0.447598	-1.15973	4.26807e-19	2.91542e-17
Q709C8	VPS13C	Vacuolar protein sorting-associated protein 13C	3641	S	1.75236	0.75564	2.31904	1.21352	4.38309e-19	2.97113e-17
Q9NUP7	TRMT13	tRNA:m(4)X modification enzyme TRM13 homolog	397	S	1.246	0.782138	1.59307	0.671806	4.38309e-19	2.97113e-17
Q6PJT7	ZC3H14	Zinc finger CCCH domain-containing protein 14	620	S	0.872081	0.546568	1.59556	0.67406	4.50117e-19	3.01663e-17
P46821	MAP1B	Microtubule-associated protein 1B	1312	S	0.26206	0.50195	0.522084	-0.937647	4.50117e-19	3.01663e-17
O43294	TGFB1I1	Transforming growth factor beta-1-induced transcript 1 protein	192	S	1.23228	3.39045	0.363456	-1.46015	4.50117e-19	3.01663e-17
Q8IY17	PNPLA6	Neuropathy target esterase	420	S	0.844337	1.55062	0.544515	-0.876957	4.74683e-19	3.11084e-17
P18433	PTPRA	Receptor-type tyrosine-protein phosphatase alpha	189	S	1.78656	3.5121	0.508685	-0.975155	4.74683e-19	3.11084e-17
Q86T65	DAAM2	Disheveled-associated activator of morphogenesis 2	656	S	1.83206	3.74246	0.489532	-1.03052	4.74683e-19	3.11084e-17
Q00577	PURA	Transcriptional activator protein Pur-alpha	183	T	1.40638	3.4493	0.407731	-1.29431	4.74683e-19	3.11084e-17
Q15746	MYLK	Myosin light chain kinase, smooth muscle	1776	S	1.7009	6.29236	0.270311	-1.88731	4.74683e-19	3.11084e-17
Q9BTV4	TMEM43	Transmembrane protein 43	194	S	3.00791	13.6231	0.220795	-2.17922	4.74683e-19	3.11084e-17
Q9BZD4	NUF2	Kinetochore protein Nuf2	247	S	0.811287	0.338843	2.39428	1.25959	4.87458e-19	3.15958e-17
Q96QB1	DLC1	Rho GTPase-activating protein 7	986	S	1.12239	2.18288	0.514177	-0.959664	4.87458e-19	3.15958e-17
Q02952	AKAP12	A-kinase anchor protein 12	1587	S	1.12895	3.00101	0.376189	-1.41047	4.87458e-19	3.15958e-17
O14715	RGPD8	RANBP2-like and GRIP domain-containing protein 8	788	S	0.719489	0.311426	2.31031	1.20808	5.00572e-19	3.18644e-17
Q99666	RGPD5	RANBP2-like and GRIP domain-containing protein 5/6	788	S	0.719489	0.311426	2.31031	1.20808	5.00572e-19	3.18644e-17
O43719	HTATSF1	HIV Tat-specific factor 1	498	S	0.697662	0.324372	2.15081	1.10488	5.00572e-19	3.18644e-17
P18858	LIG1	DNA ligase 1	183	T	0.570638	0.300685	1.8978	0.924324	5.00572e-19	3.18644e-17
Q9C019	TRIM15	Tripartite motif-containing protein 15	4	T	1.56098	5.05397	0.308862	-1.69497	5.00572e-19	3.18644e-17
Q7Z3J3	RGPD4	RanBP2-like and GRIP domain-containing protein 4	789	S	0.719489	0.311426	2.31031	1.20808	5.14035e-19	3.21453e-17
P57081	WDR4	tRNA (guanine-N(7)-)-methyltransferase non-catalytic subunit WDR4	391	S	0.897239	0.395852	2.2666	1.18053	5.14035e-19	3.21453e-17
O43598	DNPH1	2'-deoxynucleoside 5'-phosphate N-hydrolase 1	169	S	0.931235	1.46875	0.634033	-0.65737	5.14035e-19	3.21453e-17
Q86VW2	ARHGEF25	Rho guanine nucleotide exchange factor 25	560	S	1.23243	2.66786	0.461957	-1.11417	5.14035e-19	3.21453e-17
P02652	APOA2	Apolipoprotein A-II	68	S	2.5945	17.1004	0.151721	-2.72051	5.14035e-19	3.21453e-17
O43583	DENR	Density-regulated protein	73	S	1.47665	0.789769	1.86972	0.902822	5.27856e-19	3.24385e-17
Q02952	AKAP12	A-kinase anchor protein 12	1395	S	0.752408	1.2294	0.612014	-0.708363	5.27856e-19	3.24385e-17
P55285	CDH6	Cadherin-6	786	S	1.49566	3.13635	0.476878	-1.06831	5.27856e-19	3.24385e-17
P46821	MAP1B	Microtubule-associated protein 1B	832	S	0.710105	1.50295	0.472474	-1.08169	5.27856e-19	3.24385e-17
Q15746	MYLK	Myosin light chain kinase, smooth muscle	1779	S	1.51592	5.50609	0.275317	-1.86083	5.27856e-19	3.24385e-17
Q96CX2	KCTD12	BTB/POZ domain-containing protein KCTD12	196	T	1.26226	2.09607	0.602202	-0.731681	5.42043e-19	3.28556e-17
P45985	MAP2K4	Dual specificity mitogen-activated protein kinase kinase 4	394	S	1.09846	1.85839	0.591079	-0.758577	5.42043e-19	3.28556e-17
Q01484	ANK2	Ankyrin-2	890	S	0.826709	1.99009	0.415413	-1.26738	5.42043e-19	3.28556e-17
Q9BX66	SORBS1	Sorbin and SH3 domain-containing protein 1	350	S	1.29481	4.22604	0.306388	-1.70657	5.42043e-19	3.28556e-17
Q15910	EZH2	Histone-lysine N-methyltransferase EZH2	380	S	0.587765	0.210229	2.79584	1.48328	5.56608e-19	3.30614e-17
Q9Y490	TLN1	Talin-1	1021	S	1.65634	3.59893	0.460231	-1.11957	5.56608e-19	3.30614e-17
Q9Y490	TLN1	Talin-1	2040	S	1.54832	3.6642	0.422553	-1.2428	5.56608e-19	3.30614e-17
P46821	MAP1B	Microtubule-associated protein 1B	908	T	0.639142	1.70172	0.375586	-1.41278	5.56608e-19	3.30614e-17
Q8TBN0	RAB3IL1	Guanine nucleotide exchange factor for Rab-3A	179	S	0.65124	2.36156	0.275767	-1.85848	5.56608e-19	3.30614e-17
Q86VW2	ARHGEF25	Rho guanine nucleotide exchange factor 25	556	S	1.29189	2.5027	0.516198	-0.954005	5.71558e-19	3.38362e-17
Q9BWF3	RBM4	RNA-binding protein 4	86	S	1.0571	0.704268	1.501	0.585919	5.86905e-19	3.44008e-17
Q9BZQ8	NIBAN1	Protein Niban 1	582	S	1.36043	2.41295	0.563804	-0.826735	5.86905e-19	3.44008e-17
P17661	DES	Desmin	32	S	1.83945	11.5178	0.159705	-2.64652	5.86905e-19	3.44008e-17
O14896	IRF6	Interferon regulatory factor 6	47	S	6.54024	2.12241	3.08152	1.62364	6.02659e-19	3.46383e-17
O94782	USP1	Ubiquitin carboxyl-terminal hydrolase 1	475	S	0.693543	0.273444	2.53633	1.34274	6.02659e-19	3.46383e-17
Q16832	DDR2	Discoidin domain-containing receptor 2	461	S	2.40912	4.97823	0.48393	-1.04713	6.02659e-19	3.46383e-17
Q8WUY3	PRUNE2	Protein prune homolog 2	699	S	0.404131	1.15247	0.350664	-1.51184	6.02659e-19	3.46383e-17
Q14643	ITPR1	Inositol 1,4,5-trisphosphate receptor type 1	1598	S	0.430443	1.28416	0.335193	-1.57693	6.02659e-19	3.46383e-17
Q9BX66	SORBS1	Sorbin and SH3 domain-containing protein 1	556	S	2.06708	10.2013	0.202629	-2.30309	6.02659e-19	3.46383e-17
Q63ZY3	KANK2	KN motif and ankyrin repeat domain-containing protein 2	375	S	1.51253	2.93297	0.515698	-0.955401	6.18831e-19	3.5453e-17
O15372	EIF3H	Eukaryotic translation initiation factor 3 subunit H	183	S	0.907569	0.533356	1.70162	0.766909	6.35431e-19	3.58262e-17
P35611	ADD1	Alpha-adducin	358	S	1.62693	3.03052	0.536849	-0.897411	6.35431e-19	3.58262e-17
P84157	MXRA7	Matrix-remodeling-associated protein 7	128	S	1.01788	2.9334	0.346997	-1.527	6.35431e-19	3.58262e-17
P35749	MYH11	Myosin-11	1971	S	1.40266	5.04118	0.27824	-1.8456	6.35431e-19	3.58262e-17
P49792	RANBP2	E3 SUMO-protein ligase RanBP2	788	S	0.719489	0.314718	2.28614	1.19291	6.52471e-19	3.63257e-17
Q6VMQ6	ATF7IP	Activating transcription factor 7-interacting protein 1	557	S	2.12781	1.26033	1.6883	0.755569	6.52471e-19	3.63257e-17
Q02447	SP3	Transcription factor Sp3	73	S	1.05735	1.74653	0.605398	-0.724045	6.52471e-19	3.63257e-17
O75688	PPM1B	Protein phosphatase 1B	386	S	1.69822	5.88974	0.288334	-1.79419	6.52471e-19	3.63257e-17
Q9NYV4	CDK12	Cyclin-dependent kinase 12	692	T	1.13306	0.695827	1.62836	0.703423	6.69962e-19	3.66108e-17
Q96K83	ZNF521	Zinc finger protein 521	273	S	2.36691	4.08092	0.579994	-0.78589	6.69962e-19	3.66108e-17
O43294	TGFB1I1	Transforming growth factor beta-1-induced transcript 1 protein	403	S	1.22568	3.25751	0.376263	-1.41019	6.69962e-19	3.66108e-17
Q8WUY3	PRUNE2	Protein prune homolog 2	2866	S	0.939947	2.68294	0.350343	-1.51316	6.69962e-19	3.66108e-17
Q96CN7	ISOC1	Isochorismatase domain-containing protein 1	160	Y	1.86068	5.785	0.32164	-1.63648	6.69962e-19	3.66108e-17
Q15746	MYLK	Myosin light chain kinase, smooth muscle	1778	T	1.75061	7.23827	0.241854	-2.04779	6.69962e-19	3.66108e-17
Q969T4	UBE2E3	Ubiquitin-conjugating enzyme E2 E3	8	S	1.12276	0.638132	1.75945	0.815123	6.87916e-19	3.71349e-17
Q15149	PLEC	Plectin	4389	S	0.97277	1.6557	0.587527	-0.767273	6.87916e-19	3.71349e-17
Q4L180	FILIP1L	Filamin A-interacting protein 1-like	1049	S	1.94172	6.94291	0.279669	-1.83821	6.87916e-19	3.71349e-17
P35749	MYH11	Myosin-11	8	S	2.06176	12.3977	0.166302	-2.58812	6.87916e-19	3.71349e-17
P49454	CENPF	Centromere protein F	1726	S	0.895877	0.399217	2.24409	1.16613	7.06345e-19	3.76717e-17
P25205	MCM3	DNA replication licensing factor MCM3	711	S	1.34971	0.74642	1.80825	0.854593	7.06345e-19	3.76717e-17
Q15131	CDK10	Cyclin-dependent kinase 10	196	T	1.49203	0.87968	1.6961	0.762223	7.06345e-19	3.76717e-17
Q9Y2J2	EPB41L3	Band 4.1-like protein 3	88	S	1.41583	3.83904	0.368798	-1.4391	7.06345e-19	3.76717e-17
Q93052	LPP	Lipoma-preferred partner	333	T	1.21554	2.34968	0.517321	-0.950868	7.25262e-19	3.83353e-17
Q99719	SEPTIN5	Septin-5	225	S	1.80688	3.99497	0.452289	-1.14468	7.25262e-19	3.83353e-17
O75781	PALM	Paralemmin-1	152	S	1.1787	2.9856	0.394796	-1.34082	7.25262e-19	3.83353e-17
Q13506	NAB1	NGFI-A-binding protein 1	328	S	1.45352	0.704041	2.06454	1.04582	7.44679e-19	3.88985e-17
P49321	NASP	Nuclear autoantigenic sperm protein	480	S	1.16626	0.609161	1.91453	0.936991	7.44679e-19	3.88985e-17
P78559	MAP1A	Microtubule-associated protein 1A	667	S	0.864849	2.02927	0.426186	-1.23044	7.44679e-19	3.88985e-17
O15400	STX7	Syntaxin-7	129	S	0.921352	2.24808	0.409839	-1.28687	7.44679e-19	3.88985e-17
Q9UPN3	MACF1	Microtubule-actin cross-linking factor 1, isoforms 1/2/3/5	4521	S	1.01172	0.463968	2.18058	1.12471	7.64609e-19	3.9247e-17
Q99961	SH3GL1	Endophilin-A2	288	S	0.137243	0.310011	0.442702	-1.17559	7.64609e-19	3.9247e-17
Q9HBL0	TNS1	Tensin-1	915	S	1.32979	3.12096	0.426085	-1.23079	7.64609e-19	3.9247e-17
P28482	MAPK1	Mitogen-activated protein kinase 1	185	T	1.34865	4.28365	0.314836	-1.66733	7.64609e-19	3.9247e-17
P53814	SMTN	Smoothelin	792	S	1.17673	4.18078	0.281462	-1.82899	7.64609e-19	3.9247e-17
P17661	DES	Desmin	31	S	1.46653	6.30705	0.232523	-2.10456	7.64609e-19	3.9247e-17
P49792	RANBP2	E3 SUMO-protein ligase RanBP2	799	T	0.464405	0.214897	2.16106	1.11174	7.85066e-19	3.99506e-17
P23193	TCEA1	Transcription elongation factor A protein 1	100	S	0.840544	0.537901	1.56264	0.643981	7.85066e-19	3.99506e-17
Q96MM6	HSPA12B	Heat shock 70 kDa protein 12B	29	S	1.19522	2.11536	0.56502	-0.823627	7.85066e-19	3.99506e-17
Q9UN36	NDRG2	Protein NDRG2	332	S	1.18489	1.98952	0.595567	-0.747665	8.06063e-19	4.06696e-17
Q02952	AKAP12	A-kinase anchor protein 12	698	S	1.43305	3.0691	0.466928	-1.09873	8.06063e-19	4.06696e-17
Q01118	SCN7A	Sodium channel protein type 7 subunit alpha	1511	S	1.15298	4.72134	0.244207	-2.03382	8.06063e-19	4.06696e-17
Q9BPX3	NCAPG	Condensin complex subunit 3	674	S	0.627646	0.379971	1.65183	0.724062	8.27615e-19	4.14041e-17
Q6VMQ6	ATF7IP	Activating transcription factor 7-interacting protein 1	673	S	1.53525	0.995562	1.54209	0.624888	8.27615e-19	4.14041e-17
Q96B18	DACT3	Dapper homolog 3	165	S	1.31146	3.03965	0.431449	-1.21274	8.27615e-19	4.14041e-17
Q9NVP2	ASF1B	Histone chaperone ASF1B	179	T	0.539573	0.240904	2.23978	1.16336	8.49736e-19	4.19203e-17
Q9BZF1	OSBPL8	Oxysterol-binding protein-related protein 8	342	S	2.81505	1.34795	2.08839	1.06239	8.49736e-19	4.19203e-17
Q15111	PLCL1	Inactive phospholipase C-like protein 1	556	T	1.44658	2.56413	0.564162	-0.825818	8.49736e-19	4.19203e-17
P78559	MAP1A	Microtubule-associated protein 1A	2022	S	0.933373	2.25231	0.414407	-1.27088	8.49736e-19	4.19203e-17
P56693	SOX10	Transcription factor SOX-10	45	S	1.59123	4.88916	0.32546	-1.61945	8.49736e-19	4.19203e-17
Q13535	ATR	Serine/threonine-protein kinase ATR	1989	T	0.961139	0.308367	3.11687	1.6401	8.72441e-19	4.23348e-17
Q92674	CENPI	Centromere protein I	284	S	1.24412	0.434031	2.86644	1.51926	8.72441e-19	4.23348e-17
Q9C0C2	TNKS1BP1	182 kDa tankyrase-1-binding protein	494	S	1.56134	2.22059	0.703119	-0.508159	8.72441e-19	4.23348e-17
P13861	PRKAR2A	cAMP-dependent protein kinase type II-alpha regulatory subunit	80	S	1.3942	2.08723	0.667967	-0.582151	8.72441e-19	4.23348e-17
Q09666	AHNAK	Neuroblast differentiation-associated protein AHNAK	511	S	0.904862	1.98456	0.455952	-1.13305	8.72441e-19	4.23348e-17
Q9BX66	SORBS1	Sorbin and SH3 domain-containing protein 1	85	S	1.4941	3.92393	0.380766	-1.39302	8.72441e-19	4.23348e-17
Q9UHB6	LIMA1	LIM domain and actin-binding protein 1	362	S	1.63517	0.789477	2.0712	1.05047	8.95744e-19	4.32294e-17
Q6PJG2	ELMSAN1	ELM2 and SANT domain-containing protein 1	700	S	1.26925	1.89688	0.669125	-0.579652	8.95744e-19	4.32294e-17
Q16555	DPYSL2	Dihydropyrimidinase-related protein 2	509	T	0.526845	1.07869	0.488411	-1.03383	9.19662e-19	4.42634e-17
Q9BZZ5	API5	Apoptosis inhibitor 5	464	S	0.751833	0.413124	1.81987	0.863836	9.44211e-19	4.52e-17
O15061	SYNM	Synemin	1049	S	1.10782	2.87817	0.384906	-1.37742	9.44211e-19	4.52e-17
Q15035	TRAM2	Translocating chain-associated membrane protein 2	346	S	0.453451	1.04981	0.431938	-1.2111	9.69407e-19	4.62814e-17
O75449	KATNA1	Katanin p60 ATPase-containing subunit A1	170	S	1.25445	0.734788	1.70722	0.771652	9.95267e-19	4.68858e-17
Q9UIG0	BAZ1B	Tyrosine-protein kinase BAZ1B	158	S	0.602463	0.378174	1.59308	0.671821	9.95267e-19	4.68858e-17
Q66K14	TBC1D9B	TBC1 domain family member 9B	435	S	0.836136	1.20793	0.692208	-0.530723	9.95267e-19	4.68858e-17
Q96PX6	CCDC85A	Coiled-coil domain-containing protein 85A	255	S	1.35406	4.57897	0.295712	-1.75774	9.95267e-19	4.68858e-17
O15061	SYNM	Synemin	653	S	0.795417	3.12183	0.254792	-1.97261	9.95267e-19	4.68858e-17
A0FGR8	ESYT2	Extended synaptotagmin-2	758	S	0.814928	1.29538	0.629103	-0.668632	1.02181e-18	4.76307e-17
P46821	MAP1B	Microtubule-associated protein 1B	1779	S	0.18793	0.363477	0.517035	-0.951667	1.02181e-18	4.76307e-17
Q4KMG0	CDON	Cell adhesion molecule-related/down-regulated by oncogenes	1122	T	2.62283	12.7137	0.2063	-2.27719	1.02181e-18	4.76307e-17
Q66K14	TBC1D9B	TBC1 domain family member 9B	411	S	0.426735	0.668149	0.638683	-0.646829	1.04905e-18	4.83924e-17
Q969G5	CAVIN3	Caveolae-associated protein 3	165	S	1.37885	2.3427	0.588572	-0.764709	1.04905e-18	4.83924e-17
Q9UMS6	SYNPO2	Synaptopodin-2	604	S	1.44338	4.36831	0.33042	-1.59763	1.04905e-18	4.83924e-17
P46821	MAP1B	Microtubule-associated protein 1B	970	S	0.479892	2.53969	0.188957	-2.40387	1.04905e-18	4.83924e-17
Q9BZQ8	NIBAN1	Protein Niban 1	579	S	0.920319	2.49913	0.368255	-1.44122	1.077e-18	4.95533e-17
O95758	PTBP3	Polypyrimidine tract-binding protein 3	56	S	3.52811	1.25825	2.80399	1.48748	1.1057e-18	4.98405e-17
Q969H4	CNKSR1	Connector enhancer of kinase suppressor of ras 1	305	S	3.36893	1.2791	2.63382	1.39716	1.1057e-18	4.98405e-17
P25205	MCM3	DNA replication licensing factor MCM3	722	T	1.64904	0.818817	2.01393	1.01001	1.1057e-18	4.98405e-17
Q9UMS6	SYNPO2	Synaptopodin-2	610	T	1.34524	2.31964	0.579934	-0.786041	1.1057e-18	4.98405e-17
P21291	CSRP1	Cysteine and glycine-rich protein 1	192	S	1.06599	2.87601	0.370648	-1.43188	1.1057e-18	4.98405e-17
Q09666	AHNAK	Neuroblast differentiation-associated protein AHNAK	572	S	0.892692	2.49294	0.358088	-1.48162	1.1057e-18	4.98405e-17
P98095	FBLN2	Fibulin-2	277	S	2.4552	7.5079	0.327016	-1.61257	1.1057e-18	4.98405e-17
Q63HR2	TNS2	Tensin-2	1247	S	1.34973	3.37901	0.399445	-1.32393	1.13514e-18	5.10383e-17
Q14680	MELK	Maternal embryonic leucine zipper kinase	529	S	0.417921	0.187097	2.23371	1.15944	1.16536e-18	5.21331e-17
Q13425	SNTB2	Beta-2-syntrophin	208	S	0.900265	4.32302	0.208249	-2.26362	1.16536e-18	5.21331e-17
P20749	BCL3	B-cell lymphoma 3 protein	41	S	1.49015	0.923931	1.61284	0.6896	1.19638e-18	5.31192e-17
Q9UGU5	HMGXB4	HMG domain-containing protein 4	512	S	0.882404	0.568091	1.55328	0.635318	1.19638e-18	5.31192e-17
P09382	LGALS1	Galectin-1	39	S	1.11398	2.64649	0.420929	-1.24835	1.19638e-18	5.31192e-17
P13807	GYS1	Glycogen [starch] synthase, muscle	727	S	1.12213	1.63144	0.687812	-0.539914	1.22821e-18	5.39925e-17
P05060	CHGB	Secretogranin-1	405	S	1.35483	3.83757	0.353044	-1.50208	1.22821e-18	5.39925e-17
O60229	KALRN	Kalirin	1714	S	2.44746	9.59096	0.255184	-1.97039	1.22821e-18	5.39925e-17
P35749	MYH11	Myosin-11	23	S	1.65613	14.0435	0.117929	-3.08401	1.22821e-18	5.39925e-17
P51532	SMARCA4	Transcription activator BRG1	1452	S	1.77767	0.904	1.96645	0.975592	1.26087e-18	5.48851e-17
P50895	BCAM	Basal cell adhesion molecule	598	S	1.26588	2.01552	0.628068	-0.671008	1.26087e-18	5.48851e-17
Q8N6S5	ARL6IP6	ADP-ribosylation factor-like protein 6-interacting protein 6	71	S	0.619142	1.58004	0.391852	-1.35162	1.26087e-18	5.48851e-17
P02545	LMNA	Prelamin-A/C	404	S	0.507738	2.08777	0.243196	-2.03981	1.26087e-18	5.48851e-17
Q16204	CCDC6	Coiled-coil domain-containing protein 6	52	S	1.42771	0.745631	1.91477	0.937172	1.2944e-18	5.57974e-17
Q63HR2	TNS2	Tensin-2	832	S	1.27209	2.1415	0.594019	-0.751418	1.2944e-18	5.57974e-17
P12277	CKB	Creatine kinase B-type	322	T	1.23961	2.1462	0.577584	-0.791898	1.2944e-18	5.57974e-17
Q9UKI2	CDC42EP3	Cdc42 effector protein 3	144	S	0.73891	1.34705	0.548539	-0.866333	1.2944e-18	5.57974e-17
Q9Y6D6	ARFGEF1	Brefeldin A-inhibited guanine nucleotide-exchange protein 1	52	S	1.87371	0.947869	1.97676	0.983141	1.3288e-18	5.67296e-17
P49588	AARS	Alanine--tRNA ligase, cytoplasmic	554	S	1.64443	0.847709	1.93985	0.955948	1.3288e-18	5.67296e-17
Q9HB90	RRAGC	Ras-related GTP-binding protein C	95	S	0.190178	0.356676	0.533196	-0.907262	1.3288e-18	5.67296e-17
Q9NQL2	RRAGD	Ras-related GTP-binding protein D	96	S	0.190178	0.356676	0.533196	-0.907262	1.3288e-18	5.67296e-17
P49792	RANBP2	E3 SUMO-protein ligase RanBP2	3207	S	0.816047	0.403341	2.02322	1.01665	1.36411e-18	5.75453e-17
Q5VUA4	ZNF318	Zinc finger protein 318	1037	S	1.72172	0.922061	1.86725	0.900917	1.36411e-18	5.75453e-17
Q14168	MPP2	MAGUK p55 subfamily member 2	141	T	1.17215	1.90959	0.613822	-0.704108	1.36411e-18	5.75453e-17
Q99719	SEPTIN5	Septin-5	336	T	0.956991	2.21075	0.432881	-1.20796	1.36411e-18	5.75453e-17
O43294	TGFB1I1	Transforming growth factor beta-1-induced transcript 1 protein	68	S	2.06983	8.08562	0.255989	-1.96585	1.36411e-18	5.75453e-17
P17706	PTPN2	Tyrosine-protein phosphatase non-receptor type 2	304	S	0.734448	0.408556	1.79767	0.846126	1.40034e-18	5.83804e-17
Q96RT1	ERBIN	Erbin	841	S	1.6093	0.987628	1.62946	0.704395	1.40034e-18	5.83804e-17
Q8NF91	SYNE1	Nesprin-1	8305	S	0.693628	1.9143	0.36234	-1.46458	1.40034e-18	5.83804e-17
Q15746	MYLK	Myosin light chain kinase, smooth muscle	1209	S	1.81696	8.18939	0.221867	-2.17223	1.40034e-18	5.83804e-17
Q96MM6	HSPA12B	Heat shock 70 kDa protein 12B	433	S	1.79236	8.27277	0.216658	-2.20651	1.40034e-18	5.83804e-17
Q92922	SMARCC1	SWI/SNF complex subunit SMARCC1	830	S	0.866684	0.389642	2.22431	1.15336	1.43752e-18	5.96505e-17
Q8WYQ5	DGCR8	Microprocessor complex subunit DGCR8	373	S	1.30676	0.821407	1.59088	0.669823	1.43752e-18	5.96505e-17
P49321	NASP	Nuclear autoantigenic sperm protein	726	S	0.595676	0.313852	1.89795	0.924444	1.47568e-18	6.08077e-17
Q15527	SURF2	Surfeit locus protein 2	195	T	0.141816	0.202341	0.700874	-0.512773	1.47568e-18	6.08077e-17
Q9UN36	NDRG2	Protein NDRG2	330	T	1.27203	2.08911	0.608885	-0.715758	1.47568e-18	6.08077e-17
Q92930	RAB8B	Ras-related protein Rab-8B	182	S	1.2965	2.63718	0.491625	-1.02437	1.51484e-18	6.21329e-17
P02545	LMNA	Prelamin-A/C	407	S	0.625283	2.19985	0.284238	-1.81483	1.51484e-18	6.21329e-17
Q8IYB3	SRRM1	Serine/arginine repetitive matrix protein 1	292	S	1.57082	0.449242	3.49661	1.80596	1.55502e-18	6.33422e-17
Q15013	MAD2L1BP	MAD2L1-binding protein	102	S	1.27546	0.749401	1.70197	0.767208	1.55502e-18	6.33422e-17
P78559	MAP1A	Microtubule-associated protein 1A	2019	S	1.15396	2.65324	0.434926	-1.20116	1.55502e-18	6.33422e-17
Q14839	CHD4	Chromodomain-helicase-DNA-binding protein 4	108	S	2.4484	1.01529	2.41152	1.26994	1.59626e-18	6.45776e-17
P52630	STAT2	Signal transducer and activator of transcription 2	595	S	3.22738	1.51283	2.13334	1.09311	1.59626e-18	6.45776e-17
P00352	ALDH1A1	Retinal dehydrogenase 1	337	T	1.38834	7.2281	0.192076	-2.38025	1.59626e-18	6.45776e-17
P21796	VDAC1	Voltage-dependent anion-selective channel protein 1	104	S	1.58325	0.777571	2.03615	1.02584	1.63857e-18	6.56909e-17
Q92769	HDAC2	Histone deacetylase 2	424	S	1.43207	0.79541	1.80042	0.848335	1.63857e-18	6.56909e-17
Q03135	CAV1	Caveolin-1	9	S	1.38832	3.09205	0.448998	-1.15522	1.63857e-18	6.56909e-17
P17252	PRKCA	Protein kinase C alpha type	234	S	1.50755	6.35577	0.237194	-2.07586	1.63857e-18	6.56909e-17
P55317	FOXA1	Hepatocyte nuclear factor 3-alpha	307	S	1.14838	0.685096	1.67623	0.745223	1.682e-18	6.68283e-17
Q9H7L9	SUDS3	Sin3 histone deacetylase corepressor complex component SDS3	45	S	1.33447	0.804212	1.65936	0.730624	1.682e-18	6.68283e-17
Q9NS56	TOPORS	E3 ubiquitin-protein ligase Topors	98	S	0.774795	0.544479	1.423	0.508938	1.682e-18	6.68283e-17
Q6NY19	KANK3	KN motif and ankyrin repeat domain-containing protein 3	271	S	1.36655	2.15115	0.635263	-0.654573	1.682e-18	6.68283e-17
Q8N4S9	MARVELD2	MARVEL domain-containing protein 2	161	S	2.15878	1.132	1.90705	0.93134	1.72655e-18	6.7541e-17
Q96T37	RBM15	RNA-binding protein 15	656	S	0.801621	0.431895	1.85606	0.89224	1.72655e-18	6.7541e-17
O94762	RECQL5	ATP-dependent DNA helicase Q5	491	S	1.08809	0.629625	1.72815	0.789228	1.72655e-18	6.7541e-17
Q14168	MPP2	MAGUK p55 subfamily member 2	145	S	1.13396	1.89271	0.599118	-0.739088	1.72655e-18	6.7541e-17
Q8WUY3	PRUNE2	Protein prune homolog 2	1842	S	0.322466	1.22996	0.262177	-1.93139	1.72655e-18	6.7541e-17
A6NKT7	RGPD3	RanBP2-like and GRIP domain-containing protein 3	789	S	0.700423	0.318035	2.20234	1.13904	1.77228e-18	6.87241e-17
Q9Y343	SNX24	Sorting nexin-24	116	S	1.4877	0.871162	1.70772	0.772072	1.77228e-18	6.87241e-17
Q7Z3K3	POGZ	Pogo transposable element with ZNF domain	425	S	1.21388	0.842683	1.4405	0.526567	1.77228e-18	6.87241e-17
Q99719	SEPTIN5	Septin-5	327	S	1.44029	4.26403	0.337776	-1.56586	1.77228e-18	6.87241e-17
Q93074	MED12	Mediator of RNA polymerase II transcription subunit 12	698	S	1.18376	0.73496	1.61065	0.687641	1.8192e-18	6.99327e-17
Q92614	MYO18A	Unconventional myosin-XVIIIa	1970	S	0.819729	1.50603	0.544297	-0.877535	1.8192e-18	6.99327e-17
Q9H4Z3	PCIF1	mRNA (2'-O-methyladenosine-N(6)-)-methyltransferase	150	T	0.620001	1.14892	0.53964	-0.889931	1.8192e-18	6.99327e-17
P11388	TOP2A	DNA topoisomerase 2-alpha	1106	S	0.680717	0.293722	2.31755	1.2126	1.86734e-18	7.16285e-17
P46821	MAP1B	Microtubule-associated protein 1B	1265	S	0.445091	0.680205	0.654349	-0.611869	1.91674e-18	7.32073e-17
Q5VT52	RPRD2	Regulation of nuclear pre-mRNA domain-containing protein 2	614	S	0.534299	0.963141	0.554746	-0.850101	1.91674e-18	7.32073e-17
Q6PKG0	LARP1	La-related protein 1	526	T	0.985749	0.517156	1.9061	0.93062	1.96744e-18	7.41862e-17
Q9BTX1	NDC1	Nucleoporin NDC1	406	S	0.713499	0.423145	1.68618	0.753759	1.96744e-18	7.41862e-17
Q5U651	RASIP1	Ras-interacting protein 1	419	S	2.55142	5.38554	0.473754	-1.07779	1.96744e-18	7.41862e-17
Q02952	AKAP12	A-kinase anchor protein 12	1760	T	1.14539	3.12907	0.366048	-1.4499	1.96744e-18	7.41862e-17
P07197	NEFM	Neurofilament medium polypeptide	672	S	1.6391	8.11332	0.202025	-2.30739	1.96744e-18	7.41862e-17
Q9BRA0	NAA38	N-alpha-acetyltransferase 38, NatC auxiliary subunit	25	S	3.25457	1.40299	2.31974	1.21396	2.01945e-18	7.51897e-17
Q14126	DSG2	Desmoglein-2	782	S	1.20711	0.559832	2.1562	1.10849	2.01945e-18	7.51897e-17
Q8NI35	PATJ	InaD-like protein	1212	S	2.41605	1.325	1.82344	0.866666	2.01945e-18	7.51897e-17
Q9UPN9	TRIM33	E3 ubiquitin-protein ligase TRIM33	862	S	1.59342	0.961034	1.65802	0.729465	2.01945e-18	7.51897e-17
P35611	ADD1	Alpha-adducin	355	S	1.68534	3.16351	0.532744	-0.908485	2.01945e-18	7.51897e-17
Q14515	SPARCL1	SPARC-like protein 1	198	S	1.6442	5.41146	0.303836	-1.71863	2.01945e-18	7.51897e-17
Q9NVM9	INTS13	Integrator complex subunit 13	626	S	1.14698	0.68494	1.67457	0.743795	2.07283e-18	7.65352e-17
Q96ST3	SIN3A	Paired amphipathic helix protein Sin3a	860	S	1.59919	1.05289	1.51886	0.602988	2.07283e-18	7.65352e-17
P00747	PLG	Plasminogen	68	S	1.86395	5.29104	0.352284	-1.50519	2.07283e-18	7.65352e-17
Q99708	RBBP8	DNA endonuclease RBBP8	511	T	1.87023	6.8191	0.274263	-1.86637	2.07283e-18	7.65352e-17
Q96T88	UHRF1	E3 ubiquitin-protein ligase UHRF1	91	S	0.935173	0.423776	2.20676	1.14193	2.12759e-18	7.75894e-17
Q7Z3J3	RGPD4	RanBP2-like and GRIP domain-containing protein 4	800	T	0.464405	0.227868	2.03804	1.02718	2.12759e-18	7.75894e-17
Q9UN36	NDRG2	Protein NDRG2	334	T	1.50734	2.73484	0.551161	-0.859454	2.12759e-18	7.75894e-17
O15068	MCF2L	Guanine nucleotide exchange factor DBS	589	S	1.58212	3.2005	0.494337	-1.01643	2.12759e-18	7.75894e-17
Q5VU97	CACHD1	VWFA and cache domain-containing protein 1	1155	S	1.86249	4.20524	0.442898	-1.17495	2.12759e-18	7.75894e-17
P41587	VIPR2	Vasoactive intestinal polypeptide receptor 2	409	S	1.64659	4.57085	0.360238	-1.47298	2.12759e-18	7.75894e-17
Q9NQW6	ANLN	Anillin	323	S	0.366809	0.123948	2.95938	1.5653	2.18379e-18	7.9313e-17
Q96K83	ZNF521	Zinc finger protein 521	546	S	1.96389	6.09343	0.322296	-1.63354	2.18379e-18	7.9313e-17
Q9P258	RCC2	Protein RCC2	51	S	2.0414	1.13918	1.79198	0.841558	2.24145e-18	8.05832e-17
Q01105	SET	Protein SET	7	S	1.81807	1.06525	1.70671	0.771218	2.24145e-18	8.05832e-17
P37837	TALDO1	Transaldolase	237	S	1.54337	2.68132	0.5756	-0.796861	2.24145e-18	8.05832e-17
P78559	MAP1A	Microtubule-associated protein 1A	900	S	1.2689	2.73829	0.463391	-1.1097	2.24145e-18	8.05832e-17
P45974	USP5	Ubiquitin carboxyl-terminal hydrolase 5	623	T	1.5322	4.28287	0.357752	-1.48297	2.24145e-18	8.05832e-17
Q6ZRV2	FAM83H	Protein FAM83H	523	S	2.30097	1.11375	2.06596	1.04681	2.30061e-18	8.23767e-17
Q9Y2W1	THRAP3	Thyroid hormone receptor-associated protein 3	682	S	1.41531	0.864808	1.63656	0.710663	2.30061e-18	8.23767e-17
Q8IZ21	PHACTR4	Phosphatase and actin regulator 4	464	S	2.31379	1.06294	2.17678	1.12219	2.36131e-18	8.37065e-17
Q9NRF9	POLE3	DNA polymerase epsilon subunit 3	122	S	0.966278	0.448638	2.1538	1.10689	2.36131e-18	8.37065e-17
Q5TKA1	LIN9	Protein lin-9 homolog	96	T	0.473365	0.221729	2.13488	1.09415	2.36131e-18	8.37065e-17
Q15139	PRKD1	Serine/threonine-protein kinase D1	205	S	1.18306	2.07424	0.570359	-0.810057	2.36131e-18	8.37065e-17
Q93074	MED12	Mediator of RNA polymerase II transcription subunit 12	700	S	0.952201	0.555677	1.71359	0.777019	2.4236e-18	8.5403e-17
Q96T88	UHRF1	E3 ubiquitin-protein ligase UHRF1	287	S	1.44799	0.890087	1.6268	0.702035	2.4236e-18	8.5403e-17
Q9ULC3	RAB23	Ras-related protein Rab-23	187	S	1.32293	3.95253	0.334705	-1.57904	2.4236e-18	8.5403e-17
O60504	SORBS3	Vinexin	348	S	1.30853	3.05703	0.428041	-1.22418	2.48751e-18	8.71363e-17
Q8N6C5	IGSF1	Immunoglobulin superfamily member 1	1329	S	0.33599	8.14308	0.0412608	-4.59908	2.48751e-18	8.71363e-17
P42166	TMPO	Lamina-associated polypeptide 2, isoform alpha	160	T	0.574882	0.833556	0.689674	-0.536013	2.55307e-18	8.89071e-17
P42167	TMPO	Lamina-associated polypeptide 2, isoforms beta/gamma	160	T	0.574882	0.833556	0.689674	-0.536013	2.55307e-18	8.89071e-17
Q02952	AKAP12	A-kinase anchor protein 12	1331	S	1.50609	3.49299	0.431174	-1.21366	2.55307e-18	8.89071e-17
Q53EZ4	CEP55	Centrosomal protein of 55 kDa	428	S	0.961214	0.519665	1.84968	0.887274	2.62035e-18	9.08934e-17
P08670	VIM	Vimentin	325	S	4.22782	9.68962	0.436324	-1.19653	2.62035e-18	9.08934e-17
Q96PE1	ADGRA2	Adhesion G protein-coupled receptor A2	1107	S	2.24215	7.7047	0.291011	-1.78086	2.68938e-18	9.29247e-17
P17252	PRKCA	Protein kinase C alpha type	226	S	1.3993	4.91192	0.284877	-1.81159	2.68938e-18	9.29247e-17
O14936	CASK	Peripheral plasma membrane protein CASK	582	S	4.37047	1.25675	3.4776	1.79809	2.7602e-18	9.42713e-17
Q01196	RUNX1	Runt-related transcription factor 1	21	S	1.51956	0.861818	1.76321	0.818202	2.7602e-18	9.42713e-17
Q9UEY8	ADD3	Gamma-adducin	12	T	1.32227	1.98651	0.665624	-0.587221	2.7602e-18	9.42713e-17
Q9HBL0	TNS1	Tensin-1	621	S	1.29237	2.2294	0.579693	-0.786639	2.7602e-18	9.42713e-17
Q01995	TAGLN	Transgelin	166	S	0.787373	1.92131	0.40981	-1.28697	2.7602e-18	9.42713e-17
Q9Y490	TLN1	Talin-1	883	S	1.30577	3.81438	0.34233	-1.54654	2.7602e-18	9.42713e-17
Q9UIF9	BAZ2A	Bromodomain adjacent to zinc finger domain protein 2A	1770	S	0.908288	0.373248	2.43347	1.28301	2.83286e-18	9.6198e-17
O14681	EI24	Etoposide-induced protein 2.4 homolog	46	S	0.396096	0.611185	0.648079	-0.625759	2.83286e-18	9.6198e-17
Q15195	PLGLA	Plasminogen-like protein A	68	S	1.86395	5.29104	0.352284	-1.50519	2.83286e-18	9.6198e-17
Q8IWS0	PHF6	PHD finger protein 6	203	S	0.952831	0.486207	1.95972	0.970651	2.90741e-18	9.77946e-17
O60437	PPL	Periplakin	1657	S	0.953174	1.84141	0.517632	-0.950002	2.90741e-18	9.77946e-17
Q9UIG0	BAZ1B	Tyrosine-protein kinase BAZ1B	189	S	0.20179	0.462829	0.435992	-1.19763	2.90741e-18	9.77946e-17
P21333	FLNA	Filamin-A	2158	S	1.44341	4.74961	0.303901	-1.71833	2.90741e-18	9.77946e-17
P21333	FLNA	Filamin-A	2180	S	1.76149	6.47007	0.272251	-1.87699	2.90741e-18	9.77946e-17
Q14938	NFIX	Nuclear factor 1 X-type	288	S	1.35941	2.21228	0.614481	-0.70256	2.98389e-18	9.99885e-17
P09493	TPM1	Tropomyosin alpha-1 chain	174	S	1.75768	7.73024	0.227377	-2.13684	2.98389e-18	9.99885e-17
P61956	SUMO2	Small ubiquitin-related modifier 2	38	T	1.0409	0.386209	2.69518	1.43038	3.06236e-18	1.02232e-16
P19971	TYMP	Thymidine phosphorylase	50	S	2.97781	1.37366	2.1678	1.11623	3.06236e-18	1.02232e-16
Q92844	TANK	TRAF family member-associated NF-kappa-B activator	225	S	2.28793	1.22261	1.87134	0.904074	3.14287e-18	1.04137e-16
P42166	TMPO	Lamina-associated polypeptide 2, isoform alpha	67	S	0.863901	1.40135	0.616478	-0.697878	3.14287e-18	1.04137e-16
P42167	TMPO	Lamina-associated polypeptide 2, isoforms beta/gamma	67	S	0.863901	1.40135	0.616478	-0.697878	3.14287e-18	1.04137e-16
Q9P266	JCAD	Junctional protein associated with coronary artery disease	1044	S	0.761287	1.8392	0.413922	-1.27257	3.14287e-18	1.04137e-16
O15265	ATXN7	Ataxin-7	491	S	1.37552	0.77796	1.76812	0.822213	3.22547e-18	1.06675e-16
Q15424	SAFB	Scaffold attachment factor B1	24	S	1.0177	1.63452	0.62263	-0.683553	3.3102e-18	1.09071e-16
Q00577	PURA	Transcriptional activator protein Pur-alpha	182	S	1.33094	2.89237	0.460157	-1.1198	3.3102e-18	1.09071e-16
Q15633	TARBP2	RISC-loading complex subunit TARBP2	152	S	2.19431	1.34214	1.63494	0.709235	3.39714e-18	1.11728e-16
Q96GV9	C5orf30	UNC119-binding protein C5orf30	25	S	0.476378	0.242751	1.96241	0.97263	3.48633e-18	1.13818e-16
Q6IBW4	NCAPH2	Condensin-2 complex subunit H2	284	S	0.90692	0.599286	1.51333	0.59773	3.48633e-18	1.13818e-16
O15119	TBX3	T-box transcription factor TBX3	707	S	1.32302	2.14032	0.618142	-0.693989	3.48633e-18	1.13818e-16
Q63HR2	TNS2	Tensin-2	820	S	1.37713	3.1539	0.436643	-1.19547	3.48633e-18	1.13818e-16
O95471	CLDN7	Claudin-7	207	S	5.47719	2.26586	2.41727	1.27338	3.57783e-18	1.15953e-16
Q9Y6M7	SLC4A7	Sodium bicarbonate cotransporter 3	1176	S	0.114139	0.20059	0.569015	-0.813461	3.57783e-18	1.15953e-16
Q09666	AHNAK	Neuroblast differentiation-associated protein AHNAK	3716	T	0.314441	0.713791	0.440523	-1.18271	3.57783e-18	1.15953e-16
O15061	SYNM	Synemin	598	T	0.44381	5.07304	0.0874841	-3.51484	3.57783e-18	1.15953e-16
O60239	SH3BP5	SH3 domain-binding protein 5	376	S	0.74422	1.49698	0.497149	-1.00825	3.6717e-18	1.18563e-16
P46821	MAP1B	Microtubule-associated protein 1B	1298	S	0.22594	0.367107	0.615461	-0.700261	3.768e-18	1.21231e-16
P27816	MAP4	Microtubule-associated protein 4	510	S	0.667032	1.11955	0.595804	-0.747091	3.768e-18	1.21231e-16
Q63ZY3	KANK2	KN motif and ankyrin repeat domain-containing protein 2	323	S	1.46687	2.72991	0.537332	-0.896114	3.8668e-18	1.23961e-16
P28482	MAPK1	Mitogen-activated protein kinase 1	187	Y	1.41626	3.70109	0.382661	-1.38586	3.8668e-18	1.23961e-16
Q6ZNJ1	NBEAL2	Neurobeachin-like protein 2	2739	S	0.524206	1.01233	0.517821	-0.949473	4.07212e-18	1.30073e-16
Q8IYB3	SRRM1	Serine/arginine repetitive matrix protein 1	207	S	2.26248	1.10969	2.03884	1.02775	4.17878e-18	1.32055e-16
P40938	RFC3	Replication factor C subunit 3	12	S	1.06996	0.543086	1.97015	0.978302	4.17878e-18	1.32055e-16
P41227	NAA10	N-alpha-acetyltransferase 10	186	S	1.19198	0.733894	1.62419	0.69972	4.17878e-18	1.32055e-16
P42166	TMPO	Lamina-associated polypeptide 2, isoform alpha	66	S	0.900258	1.42916	0.629921	-0.666758	4.17878e-18	1.32055e-16
P42167	TMPO	Lamina-associated polypeptide 2, isoforms beta/gamma	66	S	0.900258	1.42916	0.629921	-0.666758	4.17878e-18	1.32055e-16
Q14315	FLNC	Filamin-C	2624	S	0.722252	2.69413	0.268084	-1.89925	4.17878e-18	1.32055e-16
Q460N5	PARP14	Protein mono-ADP-ribosyltransferase PARP14	33	S	2.66221	0.969972	2.74463	1.45661	4.2882e-18	1.34794e-16
Q96DY7	MTBP	Mdm2-binding protein	639	S	0.589333	0.225649	2.61172	1.385	4.2882e-18	1.34794e-16
P00747	PLG	Plasminogen	477	S	1.74497	4.96679	0.351327	-1.50911	4.2882e-18	1.34794e-16
P55854	SUMO3	Small ubiquitin-related modifier 3	37	T	1.0409	0.386209	2.69518	1.43038	4.40044e-18	1.37109e-16
Q14195	DPYSL3	Dihydropyrimidinase-related protein 3	522	S	1.31783	2.37173	0.555642	-0.847774	4.40044e-18	1.37109e-16
Q14C86	GAPVD1	GTPase-activating protein and VPS9 domain-containing protein 1	762	T	0.203937	0.40038	0.509359	-0.973246	4.40044e-18	1.37109e-16
P46821	MAP1B	Microtubule-associated protein 1B	1881	S	0.243212	0.528208	0.460448	-1.11889	4.40044e-18	1.37109e-16
Q0ZGT2	NEXN	Nexilin	80	S	1.07348	2.46782	0.43499	-1.20095	4.40044e-18	1.37109e-16
Q8IYB3	SRRM1	Serine/arginine repetitive matrix protein 1	209	S	2.21714	1.19926	1.84875	0.886552	4.51559e-18	1.39473e-16
Q5VUA4	ZNF318	Zinc finger protein 318	1243	S	0.932733	0.627756	1.48582	0.57126	4.51559e-18	1.39473e-16
Q07157	TJP1	Tight junction protein ZO-1	275	S	1.0812	1.83803	0.588238	-0.765528	4.51559e-18	1.39473e-16
Q8WXF7	ATL1	Atlastin-1	23	S	1.89335	3.56217	0.531516	-0.911814	4.51559e-18	1.39473e-16
Q02325	PLGLB1	Plasminogen-like protein B	68	S	1.86395	5.29104	0.352284	-1.50519	4.51559e-18	1.39473e-16
P49792	RANBP2	E3 SUMO-protein ligase RanBP2	796	S	0.482048	0.221654	2.17477	1.12086	4.63371e-18	1.41887e-16
Q8WYA6	CTNNBL1	Beta-catenin-like protein 1	545	S	1.35545	0.909309	1.49064	0.57593	4.63371e-18	1.41887e-16
O60504	SORBS3	Vinexin	544	S	0.900791	2.1268	0.423543	-1.23942	4.63371e-18	1.41887e-16
Q09666	AHNAK	Neuroblast differentiation-associated protein AHNAK	135	S	1.41767	3.45961	0.409778	-1.28709	4.63371e-18	1.41887e-16
Q8WUY3	PRUNE2	Protein prune homolog 2	1613	S	0.226657	1.30856	0.173211	-2.5294	4.63371e-18	1.41887e-16
P15408	FOSL2	Fos-related antigen 2	120	S	1.3928	0.658058	2.11653	1.0817	4.75487e-18	1.43373e-16
P08047	SP1	Transcription factor Sp1	59	S	0.906722	1.31367	0.690222	-0.534867	4.75487e-18	1.43373e-16
P21333	FLNA	Filamin-A	2053	S	0.922305	1.73755	0.530807	-0.91374	4.75487e-18	1.43373e-16
Q5VUB5	FAM171A1	Protein FAM171A1	855	S	0.770429	1.56049	0.49371	-1.01826	4.75487e-18	1.43373e-16
Q86UU1	PHLDB1	Pleckstrin homology-like domain family B member 1	223	S	1.09714	2.32982	0.470911	-1.08647	4.75487e-18	1.43373e-16
O60238	BNIP3L	BCL2/adenovirus E1B 19 kDa protein-interacting protein 3-like	166	S	0.251708	0.572417	0.439729	-1.18531	4.75487e-18	1.43373e-16
Q14432	PDE3A	cGMP-inhibited 3',5'-cyclic phosphodiesterase A	428	S	0.327658	0.755762	0.433547	-1.20574	4.75487e-18	1.43373e-16
P29474	NOS3	Nitric oxide synthase, endothelial	633	S	2.16721	6.2671	0.345807	-1.53196	4.75487e-18	1.43373e-16
Q0VF96	CGNL1	Cingulin-like protein 1	283	S	1.37007	2.43406	0.562873	-0.829118	4.87917e-18	1.46623e-16
P29474	NOS3	Nitric oxide synthase, endothelial	53	S	1.48817	3.07449	0.48404	-1.0468	4.87917e-18	1.46623e-16
Q03468	ERCC6	DNA excision repair protein ERCC-6	489	S	1.56514	0.860932	1.81796	0.86232	5.00667e-18	1.49694e-16
Q05682	CALD1	Caldesmon	252	S	1.13604	5.47623	0.207449	-2.26917	5.00667e-18	1.49694e-16
P05060	CHGB	Secretogranin-1	367	S	1.13411	6.63574	0.17091	-2.54869	5.00667e-18	1.49694e-16
P41227	NAA10	N-alpha-acetyltransferase 10	182	S	0.794797	0.425283	1.86886	0.902162	5.13745e-18	1.52577e-16
Q92922	SMARCC1	SWI/SNF complex subunit SMARCC1	328	S	0.457998	0.318553	1.43774	0.523806	5.13745e-18	1.52577e-16
P08670	VIM	Vimentin	299	S	1.37303	2.47936	0.553784	-0.852605	5.13745e-18	1.52577e-16
O60229	KALRN	Kalirin	1713	S	2.50225	10.4858	0.238632	-2.06714	5.13745e-18	1.52577e-16
Q8N573	OXR1	Oxidation resistance protein 1	201	S	1.50323	2.82092	0.532888	-0.908097	5.40923e-18	1.6038e-16
Q9Y2H0	DLGAP4	Disks large-associated protein 4	915	T	0.631426	0.341338	1.84986	0.887413	5.55039e-18	1.64018e-16
Q09666	AHNAK	Neuroblast differentiation-associated protein AHNAK	2397	S	1.1342	4.35202	0.260614	-1.94001	5.55039e-18	1.64018e-16
O94762	RECQL5	ATP-dependent DNA helicase Q5	488	S	1.03897	0.619627	1.67676	0.745674	5.69519e-18	1.67461e-16
Q06330	RBPJ	Recombining binding protein suppressor of hairless	18	S	1.21897	0.821555	1.48373	0.56923	5.69519e-18	1.67461e-16
Q9UMS6	SYNPO2	Synaptopodin-2	902	S	1.51411	3.66991	0.412575	-1.27727	5.69519e-18	1.67461e-16
Q9H6Y2	WDR55	WD repeat-containing protein 55	14	S	0.949107	0.604731	1.56947	0.650277	5.84371e-18	1.6986e-16
P02545	LMNA	Prelamin-A/C	22	S	0.97033	1.5768	0.61538	-0.70045	5.84371e-18	1.6986e-16
Q9C0C2	TNKS1BP1	182 kDa tankyrase-1-binding protein	1473	S	0.948401	1.61614	0.586831	-0.768982	5.84371e-18	1.6986e-16
P48681	NES	Nestin	768	S	1.22183	2.43736	0.501291	-0.99628	5.84371e-18	1.6986e-16
Q9HBL0	TNS1	Tensin-1	1588	S	1.12336	3.44761	0.325836	-1.61778	5.84371e-18	1.6986e-16
Q09666	AHNAK	Neuroblast differentiation-associated protein AHNAK	177	S	0.733332	2.25564	0.325111	-1.621	5.84371e-18	1.6986e-16
P02730	SLC4A1	Band 3 anion transport protein	357	S	1.62874	6.52333	0.24968	-2.00185	5.84371e-18	1.6986e-16
O75179	ANKRD17	Ankyrin repeat domain-containing protein 17	1709	S	0.366868	0.178639	2.05368	1.03821	6.15232e-18	1.77667e-16
P14923	JUP	Junction plakoglobin	182	S	2.23499	1.16465	1.91902	0.940371	6.15232e-18	1.77667e-16
Q96G23	CERS2	Ceramide synthase 2	348	S	1.7659	0.926724	1.90553	0.930189	6.15232e-18	1.77667e-16
Q8WXF7	ATL1	Atlastin-1	22	S	1.64274	3.47443	0.472808	-1.08067	6.15232e-18	1.77667e-16
O75400	PRPF40A	Pre-mRNA-processing factor 40 homolog A	938	S	1.91021	1.10933	1.72195	0.784043	6.31261e-18	1.81411e-16
Q86UU1	PHLDB1	Pleckstrin homology-like domain family B member 1	583	S	0.754291	1.3856	0.544377	-0.877321	6.31261e-18	1.81411e-16
Q99502	EYA1	Eyes absent homolog 1	314	S	1.16887	2.60982	0.447873	-1.15884	6.31261e-18	1.81411e-16
Q14C86	GAPVD1	GTPase-activating protein and VPS9 domain-containing protein 1	761	S	0.18266	0.309869	0.589475	-0.762497	6.47701e-18	1.84938e-16
Q8NC56	LEMD2	LEM domain-containing protein 2	134	S	0.352124	0.729482	0.482703	-1.05079	6.47701e-18	1.84938e-16
Q14738	PPP2R5D	Serine/threonine-protein phosphatase 2A 56 kDa regulatory subunit delta isoform	573	S	0.144715	0.414333	0.349272	-1.51758	6.47701e-18	1.84938e-16
P46821	MAP1B	Microtubule-associated protein 1B	561	S	0.719506	2.6905	0.267425	-1.90279	6.47701e-18	1.84938e-16
Q9NP66	HMG20A	High mobility group protein 20A	105	S	0.834254	0.531798	1.56874	0.649608	6.64564e-18	1.88842e-16
P46821	MAP1B	Microtubule-associated protein 1B	1899	S	0.229556	0.38815	0.591411	-0.757768	6.64564e-18	1.88842e-16
Q9BVG9	PTDSS2	Phosphatidylserine synthase 2	16	S	0.533177	0.961793	0.554358	-0.851111	6.64564e-18	1.88842e-16
Q5T200	ZC3H13	Zinc finger CCCH domain-containing protein 13	845	S	1.40452	0.623825	2.25146	1.17086	6.8186e-18	1.92525e-16
P34947	GRK5	G protein-coupled receptor kinase 5	484	S	0.71475	2.08067	0.343519	-1.54154	6.8186e-18	1.92525e-16
Q9UH92	MLX	Max-like protein X	42	S	1.80145	6.62643	0.271859	-1.87907	6.8186e-18	1.92525e-16
Q9BQS7	HEPH	Hephaestin	1150	S	2.542	10.0728	0.252363	-1.98643	6.8186e-18	1.92525e-16
Q5T200	ZC3H13	Zinc finger CCCH domain-containing protein 13	853	S	1.29209	0.581813	2.22079	1.15107	6.996e-18	1.95976e-16
P02724	GYPA	Glycophorin-A	147	T	1.26294	2.75794	0.457928	-1.12681	6.996e-18	1.95976e-16
Q9UMS6	SYNPO2	Synaptopodin-2	777	S	1.57561	3.69158	0.42681	-1.22833	6.996e-18	1.95976e-16
Q9BYX7	POTEKP	Putative beta-actin-like protein 3	239	S	1.23914	3.10247	0.399406	-1.32407	6.996e-18	1.95976e-16
Q02952	AKAP12	A-kinase anchor protein 12	120	S	2.08735	6.63595	0.314552	-1.66863	6.996e-18	1.95976e-16
P39880	CUX1	Homeobox protein cut-like 1	1270	S	0.757863	0.352685	2.14884	1.10356	7.17796e-18	1.99188e-16
Q9NQW6	ANLN	Anillin	792	S	0.713864	0.389274	1.83383	0.874861	7.17796e-18	1.99188e-16
Q8WVC0	LEO1	RNA polymerase-associated protein LEO1	279	S	1.38385	0.890714	1.55365	0.635657	7.17796e-18	1.99188e-16
Q07157	TJP1	Tight junction protein ZO-1	277	S	0.858347	1.69286	0.50704	-0.979829	7.17796e-18	1.99188e-16
P05412	JUN	Transcription factor AP-1	63	S	0.234351	0.539558	0.434338	-1.20311	7.17796e-18	1.99188e-16
O96019	ACTL6A	Actin-like protein 6A	233	S	1.33032	0.600669	2.21473	1.14713	7.36458e-18	2.02156e-16
O95453	PARN	Poly(A)-specific ribonuclease PARN	619	S	0.869415	0.539215	1.61237	0.689184	7.36458e-18	2.02156e-16
Q9UIG0	BAZ1B	Tyrosine-protein kinase BAZ1B	161	S	0.572989	0.361577	1.58469	0.664204	7.36458e-18	2.02156e-16
Q96P48	ARAP1	Arf-GAP with Rho-GAP domain, ANK repeat and PH domain-containing protein 1	229	S	0.749165	1.41401	0.529817	-0.916433	7.36458e-18	2.02156e-16
Q02952	AKAP12	A-kinase anchor protein 12	697	S	1.34024	2.69783	0.496787	-1.0093	7.36458e-18	2.02156e-16
Q6S8J3	POTEE	POTE ankyrin domain family member E	939	S	1.23914	3.10247	0.399406	-1.32407	7.36458e-18	2.02156e-16
Q9UHD8	SEPTIN9	Septin-9	327	S	1.5619	3.977	0.392733	-1.34838	7.36458e-18	2.02156e-16
O95997	PTTG1	Securin	165	S	0.270518	0.0874731	3.09258	1.62881	7.556e-18	2.05505e-16
Q68DK7	MSL1	Male-specific lethal 1 homolog	362	S	0.621797	0.328224	1.89443	0.921764	7.556e-18	2.05505e-16
Q01130	SRSF2	Serine/arginine-rich splicing factor 2	29	T	2.69644	1.42404	1.89352	0.921067	7.556e-18	2.05505e-16
Q92922	SMARCC1	SWI/SNF complex subunit SMARCC1	330	S	0.523936	0.369415	1.41829	0.504148	7.556e-18	2.05505e-16
Q96PE1	ADGRA2	Adhesion G protein-coupled receptor A2	991	S	1.28273	3.14555	0.407792	-1.29409	7.556e-18	2.05505e-16
Q02952	AKAP12	A-kinase anchor protein 12	371	S	0.843624	2.1621	0.390187	-1.35776	7.556e-18	2.05505e-16
P35251	RFC1	Replication factor C subunit 1	368	S	0.786749	0.380204	2.06928	1.04913	7.75232e-18	2.0988e-16
Q8TF76	HASPIN	Serine/threonine-protein kinase haspin	147	S	0.829747	0.45065	1.84122	0.880663	7.75232e-18	2.0988e-16
Q8N573	OXR1	Oxidation resistance protein 1	202	S	1.87521	3.10714	0.603514	-0.72854	7.75232e-18	2.0988e-16
P08240	SRPRA	Signal recognition particle receptor subunit alpha	298	S	1.75518	1.15017	1.52601	0.609769	7.95368e-18	2.14677e-16
Q15746	MYLK	Myosin light chain kinase, smooth muscle	1774	T	1.53512	4.55701	0.336869	-1.56974	7.95368e-18	2.14677e-16
P49736	MCM2	DNA replication licensing factor MCM2	41	S	0.901394	0.539332	1.67132	0.740984	8.16019e-18	2.17932e-16
Q9H0D6	XRN2	5'-3' exoribonuclease 2	499	S	1.28586	0.810468	1.58656	0.665901	8.16019e-18	2.17932e-16
Q6KC79	NIPBL	Nipped-B-like protein	2672	S	1.29483	0.818485	1.58198	0.661733	8.16019e-18	2.17932e-16
P42166	TMPO	Lamina-associated polypeptide 2, isoform alpha	156	S	0.638172	1.06454	0.599481	-0.738215	8.16019e-18	2.17932e-16
P42167	TMPO	Lamina-associated polypeptide 2, isoforms beta/gamma	156	S	0.638172	1.06454	0.599481	-0.738215	8.16019e-18	2.17932e-16
O15068	MCF2L	Guanine nucleotide exchange factor DBS	965	S	1.43383	2.61093	0.549163	-0.864695	8.16019e-18	2.17932e-16
Q02952	AKAP12	A-kinase anchor protein 12	248	S	0.561223	1.56002	0.359753	-1.47492	8.16019e-18	2.17932e-16
P49790	NUP153	Nuclear pore complex protein Nup153	588	T	0.519208	0.249229	2.08326	1.05884	8.372e-18	2.22585e-16
P46821	MAP1B	Microtubule-associated protein 1B	828	S	0.560735	1.04504	0.536566	-0.898173	8.372e-18	2.22585e-16
Q96PY6	NEK1	Serine/threonine-protein kinase Nek1	1126	S	0.913656	1.77949	0.513437	-0.96174	8.372e-18	2.22585e-16
Q86XP3	DDX42	ATP-dependent RNA helicase DDX42	185	S	0.901585	0.542078	1.6632	0.733961	8.58923e-18	2.27001e-16
Q99575	POP1	Ribonucleases P/MRP protein subunit POP1	730	S	0.901922	0.608022	1.48337	0.56888	8.58923e-18	2.27001e-16
P35222	CTNNB1	Catenin beta-1	551	T	0.709124	1.43607	0.493796	-1.01801	8.58923e-18	2.27001e-16
O94819	KBTBD11	Kelch repeat and BTB domain-containing protein 11	310	S	1.02384	3.01345	0.339756	-1.55743	8.58923e-18	2.27001e-16
Q9C0E8	LNPK	Endoplasmic reticulum junction formation protein lunapark	384	S	1.91254	3.64102	0.525274	-0.928857	8.81202e-18	2.31854e-16
Q9UN70	PCDHGC3	Protocadherin gamma-C3	769	S	3.68321	9.78602	0.376375	-1.40976	8.81202e-18	2.31854e-16
P42226	STAT6	Signal transducer and activator of transcription 6	641	Y	1.29745	4.348	0.298401	-1.74468	8.81202e-18	2.31854e-16
Q9BUB4	ADAT1	tRNA-specific adenosine deaminase 1	191	S	1.04134	0.546748	1.9046	0.929489	9.04051e-18	2.36465e-16
Q9UQ35	SRRM2	Serine/arginine repetitive matrix protein 2	983	T	0.705515	0.453597	1.55538	0.637267	9.04051e-18	2.36465e-16
Q6NYC8	PPP1R18	Phostensin	432	S	0.938338	1.34449	0.697912	-0.518883	9.04051e-18	2.36465e-16
Q01082	SPTBN1	Spectrin beta chain, non-erythrocytic 1	2102	S	1.86353	3.54309	0.525962	-0.926969	9.04051e-18	2.36465e-16
P78345	RPP38	Ribonuclease P protein subunit p38	235	S	0.340979	0.092878	3.67126	1.87627	9.27485e-18	2.40821e-16
Q8IZL8	PELP1	Proline-, glutamic acid- and leucine-rich protein 1	481	S	1.152	0.803302	1.43408	0.520128	9.27485e-18	2.40821e-16
Q9HBL0	TNS1	Tensin-1	911	T	1.44801	3.01753	0.479866	-1.0593	9.27485e-18	2.40821e-16
Q9UMS6	SYNPO2	Synaptopodin-2	781	S	1.3409	3.40157	0.394202	-1.34299	9.27485e-18	2.40821e-16
P43250	GRK6	G protein-coupled receptor kinase 6	484	S	0.71475	2.08067	0.343519	-1.54154	9.27485e-18	2.40821e-16
Q8N3X1	FNBP4	Formin-binding protein 4	508	S	0.692535	0.436192	1.58768	0.666922	9.51518e-18	2.45268e-16
P78559	MAP1A	Microtubule-associated protein 1A	1654	S	0.740647	1.38577	0.534468	-0.903825	9.51518e-18	2.45268e-16
P16070	CD44	CD44 antigen	697	S	1.73719	4.29941	0.404054	-1.30738	9.51518e-18	2.45268e-16
Q6ZMP0	THSD4	Thrombospondin type-1 domain-containing protein 4	557	S	2.53585	6.68562	0.379299	-1.39859	9.51518e-18	2.45268e-16
Q9HBL0	TNS1	Tensin-1	1381	S	1.16017	3.44911	0.336368	-1.57189	9.51518e-18	2.45268e-16
Q92615	LARP4B	La-related protein 4B	664	S	0.694677	0.411714	1.68728	0.754701	9.76166e-18	2.5053e-16
Q96RY7	IFT140	Intraflagellar transport protein 140 homolog	1443	S	1.01606	2.17209	0.467779	-1.0961	9.76166e-18	2.5053e-16
O95398	RAPGEF3	Rap guanine nucleotide exchange factor 3	864	S	1.07425	2.36996	0.453281	-1.14152	9.76166e-18	2.5053e-16
Q9BZ23	PANK2	Pantothenate kinase 2, mitochondrial	168	S	0.528522	0.880563	0.600209	-0.736462	1.00144e-17	2.55908e-16
Q9BX66	SORBS1	Sorbin and SH3 domain-containing protein 1	237	T	1.11588	2.20191	0.506778	-0.980574	1.00144e-17	2.55908e-16
Q9Y243	AKT3	RAC-gamma serine/threonine-protein kinase	34	S	1.25352	2.57263	0.487253	-1.03726	1.00144e-17	2.55908e-16
Q9P1Y6	PHRF1	PHD and RING finger domain-containing protein 1	814	S	1.88094	0.574068	3.27651	1.71216	1.02737e-17	2.61404e-16
P46821	MAP1B	Microtubule-associated protein 1B	1915	S	0.290574	0.56636	0.513055	-0.962814	1.02737e-17	2.61404e-16
P63267	ACTG2	Actin, gamma-enteric smooth muscle	240	S	1.23914	3.10247	0.399406	-1.32407	1.02737e-17	2.61404e-16
Q02952	AKAP12	A-kinase anchor protein 12	544	S	1.20809	2.12829	0.567635	-0.816965	1.05395e-17	2.67403e-16
O94875	SORBS2	Sorbin and SH3 domain-containing protein 2	259	S	0.657764	1.72461	0.381399	-1.39063	1.05395e-17	2.67403e-16
Q9NUY8	TBC1D23	TBC1 domain family member 23	571	S	1.78507	0.864574	2.06469	1.04592	1.08122e-17	2.72761e-16
P32519	ELF1	ETS-related transcription factor Elf-1	187	S	3.65665	1.79952	2.03201	1.02291	1.08122e-17	2.72761e-16
O15075	DCLK1	Serine/threonine-protein kinase DCLK1	337	S	1.17405	2.3526	0.499041	-1.00277	1.08122e-17	2.72761e-16
Q9BQS7	HEPH	Hephaestin	1145	S	2.2863	10.1482	0.225291	-2.15014	1.08122e-17	2.72761e-16
Q16666	IFI16	Gamma-interferon-inducible protein 16	153	S	2.23695	1.40162	1.59597	0.674433	1.10918e-17	2.78627e-16
P20020	ATP2B1	Plasma membrane calcium-transporting ATPase 1	1155	S	0.313181	0.60618	0.516648	-0.952748	1.10918e-17	2.78627e-16
P51513	NOVA1	RNA-binding protein Nova-1	154	S	1.11585	2.46218	0.453195	-1.14179	1.10918e-17	2.78627e-16
Q14C86	GAPVD1	GTPase-activating protein and VPS9 domain-containing protein 1	758	S	0.187266	0.336317	0.556814	-0.844733	1.13785e-17	2.84622e-16
P62736	ACTA2	Actin, aortic smooth muscle	241	S	1.23914	3.10247	0.399406	-1.32407	1.13785e-17	2.84622e-16
Q9NZH5	PTTG2	Securin-2	165	S	0.270518	0.0874731	3.09258	1.62881	1.16725e-17	2.91158e-16
Q9HCD5	NCOA5	Nuclear receptor coactivator 5	151	S	0.410201	1.00301	0.408968	-1.28994	1.16725e-17	2.91158e-16
Q15772	SPEG	Striated muscle preferentially expressed protein kinase	1172	S	1.20777	2.05644	0.587311	-0.767804	1.19741e-17	2.97426e-16
Q6UX71	PLXDC2	Plexin domain-containing protein 2	506	S	0.80734	1.71123	0.471788	-1.08379	1.19741e-17	2.97426e-16
P23142	FBLN1	Fibulin-1	147	S	2.4532	5.73188	0.427993	-1.22434	1.19741e-17	2.97426e-16
Q9Y490	TLN1	Talin-1	1641	S	0.848231	2.80434	0.302471	-1.72513	1.22833e-17	3.04681e-16
Q4LE39	ARID4B	AT-rich interactive domain-containing protein 4B	793	T	0.443766	0.764289	0.580626	-0.784318	1.26004e-17	3.11676e-16
Q562R1	ACTBL2	Beta-actin-like protein 2	240	S	1.23914	3.10247	0.399406	-1.32407	1.26004e-17	3.11676e-16
P29474	NOS3	Nitric oxide synthase, endothelial	114	S	1.88442	3.37	0.559174	-0.838631	1.29256e-17	3.18831e-16
Q15700	DLG2	Disks large homolog 2	414	S	1.20803	2.37302	0.509068	-0.974069	1.29256e-17	3.18831e-16
P63165	SUMO1	Small ubiquitin-related modifier 1	2	S	1.0177	0.679271	1.49823	0.583255	1.3259e-17	3.2615e-16
Q8TBN0	RAB3IL1	Guanine nucleotide exchange factor for Rab-3A	68	S	1.56982	3.1175	0.503551	-0.98979	1.3259e-17	3.2615e-16
Q8IZW8	TNS4	Tensin-4	350	S	1.17103	0.485554	2.41174	1.27008	1.3601e-17	3.31804e-16
P00367	GLUD1	Glutamate dehydrogenase 1, mitochondrial	450	S	2.46281	4.12034	0.59772	-0.742459	1.3601e-17	3.31804e-16
P49448	GLUD2	Glutamate dehydrogenase 2, mitochondrial	450	S	2.46281	4.12034	0.59772	-0.742459	1.3601e-17	3.31804e-16
P23528	CFL1	Cofilin-1	3	S	0.26262	0.445761	0.58915	-0.763294	1.3601e-17	3.31804e-16
O43741	PRKAB2	5'-AMP-activated protein kinase subunit beta-2	184	S	2.06885	3.64735	0.567221	-0.818017	1.3601e-17	3.31804e-16
P78332	RBM6	RNA-binding protein 6	746	S	0.83197	0.450217	1.84793	0.885912	1.43112e-17	3.45805e-16
P46821	MAP1B	Microtubule-associated protein 1B	1782	S	0.173136	0.310418	0.557751	-0.842308	1.43112e-17	3.45805e-16
Q01995	TAGLN	Transgelin	181	S	0.334552	0.622499	0.537434	-0.89584	1.43112e-17	3.45805e-16
O75061	DNAJC6	Putative tyrosine-protein phosphatase auxilin	570	S	0.399843	0.771408	0.518329	-0.94806	1.43112e-17	3.45805e-16
P02545	LMNA	Prelamin-A/C	423	S	1.4931	4.56815	0.326851	-1.6133	1.43112e-17	3.45805e-16
Q9Y534	CSDC2	Cold shock domain-containing protein C2	47	S	0.429571	1.49433	0.287467	-1.79853	1.43112e-17	3.45805e-16
Q6ZRV2	FAM83H	Protein FAM83H	785	S	4.45073	1.4788	3.00969	1.58961	1.46799e-17	3.51367e-16
Q15811	ITSN1	Intersectin-1	902	S	0.979225	1.59504	0.613919	-0.703879	1.46799e-17	3.51367e-16
Q16181	SEPTIN7	Septin-7	228	T	2.10577	3.68306	0.571745	-0.806557	1.46799e-17	3.51367e-16
Q92870	APBB2	Amyloid-beta A4 precursor protein-binding family B member 2	123	S	0.218448	0.444184	0.491797	-1.02387	1.46799e-17	3.51367e-16
O15431	SLC31A1	High affinity copper uptake protein 1	105	S	1.99263	8.44969	0.235823	-2.08422	1.46799e-17	3.51367e-16
Q92556	ELMO1	Engulfment and cell motility protein 1	344	S	1.94322	2.95185	0.658305	-0.603172	1.5058e-17	3.58484e-16
P46821	MAP1B	Microtubule-associated protein 1B	1154	S	0.433018	0.864084	0.50113	-0.996743	1.5058e-17	3.58484e-16
Q9NVE7	PANK4	Pantothenate kinase 4	63	S	1.37448	3.1662	0.434111	-1.20386	1.5058e-17	3.58484e-16
P60709	ACTB	Actin, cytoplasmic 1	239	S	1.23914	3.10247	0.399406	-1.32407	1.5058e-17	3.58484e-16
Q14694	USP10	Ubiquitin carboxyl-terminal hydrolase 10	365	S	0.651959	0.351405	1.85529	0.891648	1.54456e-17	3.64295e-16
Q13435	SF3B2	Splicing factor 3B subunit 2	780	T	0.0846018	0.127903	0.661455	-0.596285	1.54456e-17	3.64295e-16
Q9Y2D5	AKAP2	A-kinase anchor protein 2	152	S	0.788144	1.26882	0.621163	-0.686956	1.54456e-17	3.64295e-16
P02545	LMNA	Prelamin-A/C	632	S	0.785921	1.46015	0.538245	-0.893665	1.54456e-17	3.64295e-16
P51911	CNN1	Calponin-1	296	S	1.1078	2.42718	0.456415	-1.13158	1.54456e-17	3.64295e-16
Q96B36	AKT1S1	Proline-rich AKT1 substrate 1	183	S	0.0911303	0.285451	0.31925	-1.64724	1.54456e-17	3.64295e-16
Q96QE3	ATAD5	ATPase family AAA domain-containing protein 5	388	S	0.424367	0.215504	1.96919	0.9776	1.58431e-17	3.72681e-16
P55198	MLLT6	Protein AF-17	258	S	0.968131	0.520536	1.85987	0.895204	1.58431e-17	3.72681e-16
Q92777	SYN2	Synapsin-2	425	S	0.618752	1.53454	0.403216	-1.31037	1.62508e-17	3.81764e-16
Q9NQG5	RPRD1B	Regulation of nuclear pre-mRNA domain-containing protein 1B	134	S	1.61264	1.1195	1.4405	0.526573	1.66687e-17	3.90035e-16
Q9UEY8	ADD3	Gamma-adducin	673	S	0.780461	1.3213	0.590677	-0.759559	1.66687e-17	3.90035e-16
Q92614	MYO18A	Unconventional myosin-XVIIIa	1974	S	0.651649	1.15028	0.566512	-0.819821	1.66687e-17	3.90035e-16
Q9BUZ4	TRAF4	TNF receptor-associated factor 4	426	S	1.13727	0.419492	2.71107	1.43886	1.70973e-17	3.97445e-16
P16144	ITGB4	Integrin beta-4	1530	T	1.29883	0.694976	1.86888	0.902174	1.70973e-17	3.97445e-16
Q5VUA4	ZNF318	Zinc finger protein 318	1971	S	0.472109	0.270871	1.74293	0.801514	1.70973e-17	3.97445e-16
Q9H0D6	XRN2	5'-3' exoribonuclease 2	501	S	1.26693	0.831382	1.52389	0.607755	1.70973e-17	3.97445e-16
O60279	SUSD5	Sushi domain-containing protein 5	105	S	1.93049	4.65832	0.414418	-1.27084	1.70973e-17	3.97445e-16
P45880	VDAC2	Voltage-dependent anion-selective channel protein 2	115	S	2.00119	1.00987	1.98163	0.986684	1.75367e-17	4.06065e-16
P46821	MAP1B	Microtubule-associated protein 1B	1793	S	0.227048	0.421553	0.538599	-0.892716	1.75367e-17	4.06065e-16
A5A3E0	POTEF	POTE ankyrin domain family member F	939	S	1.23914	3.10247	0.399406	-1.32407	1.75367e-17	4.06065e-16
Q6ZRV2	FAM83H	Protein FAM83H	1068	S	1.92773	1.03217	1.86765	0.901223	1.79873e-17	4.14876e-16
P52943	CRIP2	Cysteine-rich protein 2	115	S	0.292171	0.480778	0.607704	-0.718559	1.79873e-17	4.14876e-16
Q9NZN4	EHD2	EH domain-containing protein 2	373	S	1.74255	7.13749	0.244141	-2.03421	1.79873e-17	4.14876e-16
P49761	CLK3	Dual specificity protein kinase CLK3	283	S	0.958443	0.602405	1.59103	0.669959	1.84493e-17	4.24979e-16
Q13541	EIF4EBP1	Eukaryotic translation initiation factor 4E-binding protein 1	37	T	0.982068	1.60155	0.613199	-0.705574	1.8923e-17	4.34201e-16
O15083	ERC2	ERC protein 2	187	S	0.630087	0.29838	2.11169	1.0784	1.94087e-17	4.42487e-16
Q8IUD2	ERC1	ELKS/Rab6-interacting/CAST family member 1	191	S	0.630087	0.29838	2.11169	1.0784	1.94087e-17	4.42487e-16
O75367	H2AFY	Core histone macro-H2A.1	129	T	0.658563	0.317814	2.07216	1.05114	1.94087e-17	4.42487e-16
Q14678	KANK1	KN motif and ankyrin repeat domain-containing protein 1	325	S	1.17961	1.86872	0.631243	-0.663733	1.94087e-17	4.42487e-16
P53814	SMTN	Smoothelin	251	S	0.956534	1.70324	0.561598	-0.83239	1.94087e-17	4.42487e-16
P0DJD1	RGPD2	RANBP2-like and GRIP domain-containing protein 2	787	S	0.685694	0.316692	2.16518	1.11449	1.99066e-17	4.521e-16
Q5JSH3	WDR44	WD repeat-containing protein 44	561	S	1.86773	1.16243	1.60674	0.684137	1.99066e-17	4.521e-16
Q14515	SPARCL1	SPARC-like protein 1	419	T	1.89414	5.53523	0.342196	-1.5471	1.99066e-17	4.521e-16
Q01804	OTUD4	OTU domain-containing protein 4	546	S	1.16421	0.699205	1.66505	0.735565	2.04172e-17	4.59582e-16
Q9Y343	SNX24	Sorting nexin-24	113	S	1.64333	0.99073	1.65871	0.730059	2.04172e-17	4.59582e-16
Q9UBP9	GULP1	PTB domain-containing engulfment adapter protein 1	208	T	0.955541	1.68695	0.566431	-0.820028	2.04172e-17	4.59582e-16
Q12946	FOXF1	Forkhead box protein F1	335	S	1.6395	3.4051	0.481485	-1.05444	2.04172e-17	4.59582e-16
Q09666	AHNAK	Neuroblast differentiation-associated protein AHNAK	379	S	1.06313	2.29048	0.464152	-1.10733	2.04172e-17	4.59582e-16
P48681	NES	Nestin	680	S	1.15401	2.5348	0.455265	-1.13522	2.04172e-17	4.59582e-16
P63261	ACTG1	Actin, cytoplasmic 2	239	S	1.23914	3.10247	0.399406	-1.32407	2.09407e-17	4.70769e-16
P06748	NPM1	Nucleophosmin	70	S	0.739135	0.428231	1.72602	0.78745	2.14775e-17	4.80403e-16
Q15149	PLEC	Plectin	4386	S	0.893256	1.49118	0.599028	-0.739305	2.14775e-17	4.80403e-16
Q96AM1	MRGPRF	Mas-related G-protein coupled receptor member F	327	T	1.26392	2.11993	0.596205	-0.74612	2.14775e-17	4.80403e-16
P35556	FBN2	Fibrillin-2	885	S	0.586068	1.84241	0.318098	-1.65246	2.14775e-17	4.80403e-16
P35658	NUP214	Nuclear pore complex protein Nup214	940	S	0.355582	0.150724	2.35916	1.23827	2.20278e-17	4.89629e-16
Q9NZN5	ARHGEF12	Rho guanine nucleotide exchange factor 12	341	S	1.41153	2.71367	0.520154	-0.94299	2.20278e-17	4.89629e-16
Q12791	KCNMA1	Calcium-activated potassium channel subunit alpha-1	978	S	1.06908	2.28503	0.467862	-1.09584	2.20278e-17	4.89629e-16
Q9Y2J2	EPB41L3	Band 4.1-like protein 3	708	S	1.12744	3.88827	0.289959	-1.78608	2.20278e-17	4.89629e-16
P06493	CDK1	Cyclin-dependent kinase 1	15	Y	0.686109	0.332234	2.06514	1.04624	2.2592e-17	4.97809e-16
P24941	CDK2	Cyclin-dependent kinase 2	15	Y	0.686109	0.332234	2.06514	1.04624	2.2592e-17	4.97809e-16
Q00526	CDK3	Cyclin-dependent kinase 3	15	Y	0.686109	0.332234	2.06514	1.04624	2.2592e-17	4.97809e-16
Q9HB96	FANCE	Fanconi anemia group E protein	204	S	1.14222	0.624267	1.8297	0.871609	2.2592e-17	4.97809e-16
Q9Y2K7	KDM2A	Lysine-specific demethylase 2A	28	S	0.844321	0.534028	1.58104	0.660877	2.2592e-17	4.97809e-16
Q13425	SNTB2	Beta-2-syntrophin	95	S	1.23305	2.57431	0.478985	-1.06195	2.2592e-17	4.97809e-16
Q93100	PHKB	Phosphorylase b kinase regulatory subunit beta	27	S	0.406139	0.897087	0.452731	-1.14327	2.2592e-17	4.97809e-16
P52701	MSH6	DNA mismatch repair protein Msh6	252	S	1.70291	0.621738	2.73895	1.45362	2.31705e-17	5.08663e-16
P0DJD0	RGPD1	RANBP2-like and GRIP domain-containing protein 1	779	S	0.685694	0.316692	2.16518	1.11449	2.31705e-17	5.08663e-16
Q5HYW2	NHSL2	NHS-like protein 2	342	S	1.02542	3.17342	0.323128	-1.62982	2.31705e-17	5.08663e-16
O75190	DNAJB6	DnaJ homolog subfamily B member 6	277	S	1.0703	1.52471	0.701969	-0.510522	2.37636e-17	5.21039e-16
Q6XE24	RBMS3	RNA-binding motif, single-stranded-interacting protein 3	111	S	0.290678	0.149072	1.94991	0.96341	2.43716e-17	5.32399e-16
Q9ULT0	TTC7A	Tetratricopeptide repeat protein 7A	51	S	2.85414	1.85404	1.53942	0.622384	2.43716e-17	5.32399e-16
Q9BZ23	PANK2	Pantothenate kinase 2, mitochondrial	189	S	0.716702	1.16804	0.613594	-0.704643	2.43716e-17	5.32399e-16
P48651	PTDSS1	Phosphatidylserine synthase 1	442	S	1.00728	0.641563	1.57003	0.650796	2.4995e-17	5.42017e-16
Q9NYV4	CDK12	Cyclin-dependent kinase 12	681	S	1.45836	0.943612	1.54551	0.628084	2.4995e-17	5.42017e-16
O14974	PPP1R12A	Protein phosphatase 1 regulatory subunit 12A	299	S	0.989085	1.80292	0.548601	-0.866172	2.4995e-17	5.42017e-16
Q01082	SPTBN1	Spectrin beta chain, non-erythrocytic 1	2169	S	1.04324	1.94022	0.537691	-0.895151	2.4995e-17	5.42017e-16
Q15811	ITSN1	Intersectin-1	1144	T	1.24962	2.73196	0.457405	-1.12845	2.4995e-17	5.42017e-16
Q9BR39	JPH2	Junctophilin-2	162	S	1.11664	2.82783	0.394877	-1.34053	2.4995e-17	5.42017e-16
P52701	MSH6	DNA mismatch repair protein Msh6	227	S	1.20999	0.552194	2.19124	1.13175	2.56342e-17	5.53175e-16
Q96TC7	RMDN3	Regulator of microtubule dynamics protein 3	193	S	4.06434	1.94013	2.09488	1.06687	2.56342e-17	5.53175e-16
Q9NZT2	OGFR	Opioid growth factor receptor	315	S	0.892709	0.630124	1.41672	0.502554	2.56342e-17	5.53175e-16
Q9BYB0	SHANK3	SH3 and multiple ankyrin repeat domains protein 3	395	S	1.34534	2.55391	0.526778	-0.924733	2.56342e-17	5.53175e-16
Q8TDS4	HCAR2	Hydroxycarboxylic acid receptor 2	328	S	2.61729	1.22477	2.13696	1.09556	2.62894e-17	5.63889e-16
Q8IWA0	WDR75	WD repeat-containing protein 75	796	S	0.313026	0.159537	1.96209	0.972391	2.62894e-17	5.63889e-16
P46939	UTRN	Utrophin	295	S	1.4391	2.27719	0.631961	-0.662092	2.62894e-17	5.63889e-16
Q09666	AHNAK	Neuroblast differentiation-associated protein AHNAK	5031	S	0.167256	0.272697	0.613337	-0.705247	2.62894e-17	5.63889e-16
Q63HR2	TNS2	Tensin-2	483	Y	1.50589	3.51475	0.42845	-1.2228	2.62894e-17	5.63889e-16
P68366	TUBA4A	Tubulin alpha-4A chain	48	S	0.346631	0.171389	2.02249	1.01613	2.69612e-17	5.7621e-16
Q13769	THOC5	THO complex subunit 5 homolog	314	S	1.44864	0.931286	1.55553	0.637403	2.69612e-17	5.7621e-16
Q15811	ITSN1	Intersectin-1	904	S	1.03183	1.84529	0.559167	-0.838649	2.69612e-17	5.7621e-16
Q6PJF5	RHBDF2	Inactive rhomboid protein 2	90	S	2.14106	1.01673	2.10583	1.07439	2.76499e-17	5.8951e-16
Q96G23	CERS2	Ceramide synthase 2	349	S	1.72631	0.890375	1.93886	0.95521	2.76499e-17	5.8951e-16
P39880	CUX1	Homeobox protein cut-like 1	1069	S	2.33274	0.962137	2.42453	1.27771	2.83559e-17	6.03115e-16
O60841	EIF5B	Eukaryotic translation initiation factor 5B	595	S	2.48368	1.21981	2.03612	1.02582	2.83559e-17	6.03115e-16
P35611	ADD1	Alpha-adducin	12	S	1.14468	2.49543	0.458708	-1.12435	2.90798e-17	6.17771e-16
Q92769	HDAC2	Histone deacetylase 2	422	S	1.90342	1.07619	1.76866	0.822655	2.98218e-17	6.30518e-16
P26045	PTPN3	Tyrosine-protein phosphatase non-receptor type 3	425	S	0.838709	0.494091	1.69748	0.763393	2.98218e-17	6.30518e-16
P15408	FOSL2	Fos-related antigen 2	200	S	2.04114	1.26411	1.61469	0.691253	2.98218e-17	6.30518e-16
Q9P2N5	RBM27	RNA-binding protein 27	120	S	0.669188	0.350299	1.91033	0.933824	3.05825e-17	6.45066e-16
Q01813	PFKP	ATP-dependent 6-phosphofructokinase, platelet type	386	S	0.271511	0.724257	0.374882	-1.41549	3.05825e-17	6.45066e-16
Q13112	CHAF1B	Chromatin assembly factor 1 subunit B	410	S	0.688187	0.275704	2.49611	1.31968	3.13624e-17	6.58388e-16
Q5VUA4	ZNF318	Zinc finger protein 318	136	S	0.839002	0.529121	1.58565	0.665075	3.13624e-17	6.58388e-16
O43491	EPB41L2	Band 4.1-like protein 2	87	S	0.145617	0.24297	0.599321	-0.7386	3.13624e-17	6.58388e-16
Q63ZY3	KANK2	KN motif and ankyrin repeat domain-containing protein 2	101	S	1.40783	3.16989	0.444126	-1.17096	3.13624e-17	6.58388e-16
Q9BW71	HIRIP3	HIRA-interacting protein 3	125	S	0.630387	0.401145	1.57147	0.652115	3.21619e-17	6.73579e-16
Q9NVM1	EVA1B	Protein eva-1 homolog B	85	T	1.2316	2.72087	0.45265	-1.14353	3.21619e-17	6.73579e-16
Q9P258	RCC2	Protein RCC2	50	S	2.11957	1.26513	1.67538	0.744489	3.29814e-17	6.875e-16
Q01167	FOXK2	Forkhead box protein K2	30	S	1.15183	1.62898	0.707089	-0.500036	3.29814e-17	6.875e-16
Q6PKG0	LARP1	La-related protein 1	847	S	0.337985	0.622289	0.543132	-0.880626	3.29814e-17	6.875e-16
Q14195	DPYSL3	Dihydropyrimidinase-related protein 3	509	T	0.716779	1.60883	0.445528	-1.16641	3.29814e-17	6.875e-16
O94964	SOGA1	Protein SOGA1	1303	S	2.47149	1.379	1.79224	0.84176	3.38216e-17	7.03363e-16
Q9H8M2	BRD9	Bromodomain-containing protein 9	103	T	0.516931	0.926418	0.557988	-0.841693	3.38216e-17	7.03363e-16
P35556	FBN2	Fibrillin-2	886	T	0.586068	1.84241	0.318098	-1.65246	3.46829e-17	7.19589e-16
Q9ULC0	EMCN	Endomucin	237	S	1.31018	6.22706	0.210401	-2.24879	3.46829e-17	7.19589e-16
Q01082	SPTBN1	Spectrin beta chain, non-erythrocytic 1	2138	S	0.938442	1.44478	0.649541	-0.622506	3.55658e-17	7.34475e-16
Q01082	SPTBN1	Spectrin beta chain, non-erythrocytic 1	2328	T	0.218176	0.447301	0.487762	-1.03575	3.55658e-17	7.34475e-16
Q8IVF2	AHNAK2	Protein AHNAK2	842	S	0.529296	1.30419	0.405844	-1.301	3.55658e-17	7.34475e-16
Q14515	SPARCL1	SPARC-like protein 1	84	S	1.43982	4.616	0.31192	-1.68075	3.55658e-17	7.34475e-16
Q8IYB3	SRRM1	Serine/arginine repetitive matrix protein 1	205	T	2.05995	1.08326	1.90163	0.927236	3.64708e-17	7.48812e-16
P61160	ACTR2	Actin-related protein 2	117	T	2.09926	3.62247	0.57951	-0.787094	3.64708e-17	7.48812e-16
Q9Y2U5	MAP3K2	Mitogen-activated protein kinase kinase kinase 2	153	S	0.216611	0.405712	0.533903	-0.90535	3.64708e-17	7.48812e-16
Q9BR39	JPH2	Junctophilin-2	469	S	0.971239	1.87134	0.519008	-0.946171	3.64708e-17	7.48812e-16
Q13542	EIF4EBP2	Eukaryotic translation initiation factor 4E-binding protein 2	37	T	0.498936	1.01337	0.492354	-1.02223	3.64708e-17	7.48812e-16
Q9H4L5	OSBPL3	Oxysterol-binding protein-related protein 3	304	S	1.81866	0.946671	1.92112	0.941944	3.73986e-17	7.62571e-16
P78364	PHC1	Polyhomeotic-like protein 1	862	S	0.252515	0.391819	0.644469	-0.633817	3.73986e-17	7.62571e-16
P46821	MAP1B	Microtubule-associated protein 1B	1389	S	0.546523	0.864785	0.631976	-0.662059	3.73986e-17	7.62571e-16
Q96T51	RUFY1	RUN and FYVE domain-containing protein 1	618	S	1.36436	2.7156	0.502417	-0.993043	3.73986e-17	7.62571e-16
Q01484	ANK2	Ankyrin-2	3814	T	0.994417	2.4015	0.414082	-1.27201	3.73986e-17	7.62571e-16
P31350	RRM2	Ribonucleoside-diphosphate reductase subunit M2	20	S	0.479514	0.217282	2.20688	1.14201	3.83497e-17	7.775e-16
O75362	ZNF217	Zinc finger protein 217	445	S	0.844994	0.564457	1.497	0.582078	3.83497e-17	7.775e-16
Q9NVU0	POLR3E	DNA-directed RNA polymerase III subunit RPC5	162	S	1.07821	0.729302	1.47842	0.564056	3.83497e-17	7.775e-16
Q96CX2	KCTD12	BTB/POZ domain-containing protein KCTD12	185	S	1.31927	2.01123	0.65595	-0.608342	3.83497e-17	7.775e-16
Q9UQ16	DNM3	Dynamin-3	773	S	1.33896	3.06032	0.437522	-1.19257	3.83497e-17	7.775e-16
O95400	CD2BP2	CD2 antigen cytoplasmic tail-binding protein 2	195	S	1.4822	0.878302	1.68757	0.754947	3.93246e-17	7.95449e-16
Q8N5W9	RFLNB	Refilin-B	6	S	0.484122	1.34538	0.359839	-1.47457	3.93246e-17	7.95449e-16
Q9Y3R5	DOP1B	Protein dopey-2	1021	S	2.2415	1.02527	2.18626	1.12846	4.03239e-17	8.06478e-16
Q9Y388	RBMX2	RNA-binding motif protein, X-linked 2	188	S	1.01011	0.583235	1.73191	0.792367	4.03239e-17	8.06478e-16
O15258	RER1	Protein RER1	95	S	2.98126	1.94725	1.53101	0.614486	4.03239e-17	8.06478e-16
P78559	MAP1A	Microtubule-associated protein 1A	1797	S	1.05991	1.6034	0.66104	-0.59719	4.03239e-17	8.06478e-16
Q96PE2	ARHGEF17	Rho guanine nucleotide exchange factor 17	961	S	0.923782	1.73991	0.530938	-0.913385	4.03239e-17	8.06478e-16
P23470	PTPRG	Receptor-type tyrosine-protein phosphatase gamma	1182	S	0.766714	1.80163	0.425566	-1.23254	4.03239e-17	8.06478e-16
P68032	ACTC1	Actin, alpha cardiac muscle 1	241	S	1.23914	3.10247	0.399406	-1.32407	4.03239e-17	8.06478e-16
P05129	PRKCG	Protein kinase C gamma type	514	T	3.80507	13.3514	0.284994	-1.811	4.03239e-17	8.06478e-16
P05771	PRKCB	Protein kinase C beta type	500	T	3.80507	13.3514	0.284994	-1.811	4.03239e-17	8.06478e-16
P17252	PRKCA	Protein kinase C alpha type	497	T	3.80507	13.3514	0.284994	-1.811	4.03239e-17	8.06478e-16
Q96EV8	DTNBP1	Dysbindin	321	S	1.23045	1.75878	0.699602	-0.515394	4.13483e-17	8.24181e-16
P27816	MAP4	Microtubule-associated protein 4	507	S	0.676976	1.19066	0.568573	-0.814582	4.13483e-17	8.24181e-16
P02730	SLC4A1	Band 3 anion transport protein	356	S	1.48921	5.59119	0.26635	-1.90861	4.13483e-17	8.24181e-16
Q13111	CHAF1A	Chromatin assembly factor 1 subunit A	775	S	0.596395	0.348221	1.71269	0.776268	4.23983e-17	8.42275e-16
Q9UNS1	TIMELESS	Protein timeless homolog	1173	S	0.61313	0.409831	1.49606	0.581166	4.23983e-17	8.42275e-16
Q9UDT6	CLIP2	CAP-Gly domain-containing linker protein 2	923	S	1.13463	1.64687	0.688962	-0.537505	4.23983e-17	8.42275e-16
Q8IYB3	SRRM1	Serine/arginine repetitive matrix protein 1	211	S	1.96176	1.09889	1.78522	0.8361	4.34747e-17	8.58854e-16
P49321	NASP	Nuclear autoantigenic sperm protein	477	T	0.954772	0.578539	1.65032	0.722742	4.34747e-17	8.58854e-16
P11532	DMD	Dystrophin	3623	S	0.6703	1.21772	0.550456	-0.861302	4.34747e-17	8.58854e-16
Q9H063	MAF1	Repressor of RNA polymerase III transcription MAF1 homolog	75	S	0.784557	1.55239	0.505386	-0.984543	4.34747e-17	8.58854e-16
Q63ZY3	KANK2	KN motif and ankyrin repeat domain-containing protein 2	406	S	1.44932	9.26125	0.156493	-2.67583	4.34747e-17	8.58854e-16
Q5THJ4	VPS13D	Vacuolar protein sorting-associated protein 13D	2671	S	5.81735	1.71114	3.39969	1.7654	4.45779e-17	8.76749e-16
O14979	HNRNPDL	Heterogeneous nuclear ribonucleoprotein D-like	241	S	1.87553	1.02969	1.82145	0.865091	4.45779e-17	8.76749e-16
Q8N3D4	EHBP1L1	EH domain-binding protein 1-like protein 1	1257	S	0.842692	1.21019	0.696333	-0.522151	4.45779e-17	8.76749e-16
P46821	MAP1B	Microtubule-associated protein 1B	1785	S	0.231879	0.463444	0.50034	-0.99902	4.45779e-17	8.76749e-16
Q9ULH1	ASAP1	Arf-GAP with SH3 domain, ANK repeat and PH domain-containing protein 1	1041	S	1.15986	1.94867	0.595207	-0.748537	4.57088e-17	8.94041e-16
Q9BXF6	RAB11FIP5	Rab11 family-interacting protein 5	357	S	0.359438	0.658763	0.545626	-0.874015	4.57088e-17	8.94041e-16
P02511	CRYAB	Alpha-crystallin B chain	19	S	1.10081	3.15805	0.348574	-1.52046	4.57088e-17	8.94041e-16
Q9HCL0	PCDH18	Protocadherin-18	781	S	1.59229	5.38358	0.295767	-1.75747	4.57088e-17	8.94041e-16
Q14677	CLINT1	Clathrin interactor 1	227	S	1.69708	1.06077	1.59986	0.677945	4.6868e-17	9.12693e-16
O75909	CCNK	Cyclin-K	329	S	1.52912	0.962036	1.58947	0.668542	4.6868e-17	9.12693e-16
Q16537	PPP2R5E	Serine/threonine-protein phosphatase 2A 56 kDa regulatory subunit epsilon isoform	33	S	0.473973	0.77511	0.611491	-0.709597	4.6868e-17	9.12693e-16
Q53TN4	CYBRD1	Cytochrome b reductase 1	260	S	1.65279	3.57907	0.461793	-1.11468	4.6868e-17	9.12693e-16
Q96QE3	ATAD5	ATPase family AAA domain-containing protein 5	369	S	0.424367	0.217339	1.95256	0.965369	4.80562e-17	9.27693e-16
P15822	HIVEP1	Zinc finger protein 40	866	S	1.5179	0.817661	1.85639	0.892502	4.80562e-17	9.27693e-16
Q15649	ZNHIT3	Zinc finger HIT domain-containing protein 3	80	S	1.01004	0.585027	1.72648	0.787836	4.80562e-17	9.27693e-16
Q9BXP5	SRRT	Serrate RNA effector molecule homolog	493	S	0.844031	0.576721	1.4635	0.549423	4.80562e-17	9.27693e-16
P78559	MAP1A	Microtubule-associated protein 1A	1675	S	0.904483	1.43395	0.630765	-0.664825	4.80562e-17	9.27693e-16
O15075	DCLK1	Serine/threonine-protein kinase DCLK1	307	S	1.1997	2.23934	0.535739	-0.900397	4.80562e-17	9.27693e-16
Q13542	EIF4EBP2	Eukaryotic translation initiation factor 4E-binding protein 2	46	T	0.507909	0.963705	0.527038	-0.924021	4.80562e-17	9.27693e-16
Q9H019	MTFR1L	Mitochondrial fission regulator 1-like	237	S	0.317717	0.800874	0.396712	-1.33384	4.80562e-17	9.27693e-16
O00418	EEF2K	Eukaryotic elongation factor 2 kinase	438	S	4.32879	1.85993	2.32739	1.21872	4.9274e-17	9.48111e-16
Q9H6U6	BCAS3	Breast carcinoma-amplified sequence 3	570	S	0.99982	0.504611	1.98137	0.986497	4.9274e-17	9.48111e-16
Q8N5S9	CAMKK1	Calcium/calmodulin-dependent protein kinase kinase 1	458	S	1.31006	2.95379	0.44352	-1.17293	4.9274e-17	9.48111e-16
Q03468	ERCC6	DNA excision repair protein ERCC-6	486	S	1.56325	0.854148	1.83019	0.871991	5.05223e-17	9.64813e-16
Q12888	TP53BP1	TP53-binding protein 1	1758	S	1.41105	0.79781	1.76865	0.822651	5.05223e-17	9.64813e-16
P52701	MSH6	DNA mismatch repair protein Msh6	137	S	1.17995	0.768076	1.53624	0.619399	5.05223e-17	9.64813e-16
Q9UJQ4	SALL4	Sal-like protein 4	776	S	0.169681	0.24069	0.704976	-0.504354	5.05223e-17	9.64813e-16
P50895	BCAM	Basal cell adhesion molecule	600	S	1.10414	1.75218	0.630153	-0.666227	5.05223e-17	9.64813e-16
P47712	PLA2G4A	Cytosolic phospholipase A2	729	S	0.524846	1.08672	0.482962	-1.05002	5.05223e-17	9.64813e-16
Q9Y4R8	TELO2	Telomere length regulation protein TEL2 homolog	836	S	0.898613	0.513747	1.74914	0.806643	5.18018e-17	9.83957e-16
Q9BR39	JPH2	Junctophilin-2	490	T	0.93122	1.66902	0.557943	-0.84181	5.18018e-17	9.83957e-16
Q8WX93	PALLD	Palladin	641	S	0.368866	1.01549	0.36324	-1.461	5.18018e-17	9.83957e-16
P68032	ACTC1	Actin, alpha cardiac muscle 1	205	T	0.846736	3.06999	0.275811	-1.85825	5.18018e-17	9.83957e-16
P25098	GRK2	Beta-adrenergic receptor kinase 1	670	S	2.74869	1.51704	1.81188	0.857486	5.31132e-17	1.0035e-15
Q14677	CLINT1	Clathrin interactor 1	232	S	2.067	1.35081	1.5302	0.61372	5.31132e-17	1.0035e-15
A6QL63	BTBD11	Ankyrin repeat and BTB/POZ domain-containing protein BTBD11	523	S	1.91673	6.47818	0.295875	-1.75694	5.31132e-17	1.0035e-15
Q14839	CHD4	Chromodomain-helicase-DNA-binding protein 4	1535	S	1.41127	0.989631	1.42606	0.512032	5.44574e-17	1.02237e-15
Q07157	TJP1	Tight junction protein ZO-1	280	S	0.919607	1.60886	0.571588	-0.806952	5.44574e-17	1.02237e-15
Q9HBL0	TNS1	Tensin-1	433	S	1.28887	2.88984	0.446	-1.16488	5.44574e-17	1.02237e-15
Q5VY43	PEAR1	Platelet endothelial aggregation receptor 1	1029	S	1.47135	4.01985	0.366022	-1.45	5.44574e-17	1.02237e-15
Q9NZJ4	SACS	Sacsin	1779	S	0.464169	1.32226	0.351043	-1.51028	5.44574e-17	1.02237e-15
Q14515	SPARCL1	SPARC-like protein 1	80	S	1.37091	4.36193	0.31429	-1.66983	5.44574e-17	1.02237e-15
Q12923	PTPN13	Tyrosine-protein phosphatase non-receptor type 13	437	S	1.08288	0.300228	3.60686	1.85074	5.58351e-17	1.04163e-15
P06493	CDK1	Cyclin-dependent kinase 1	14	T	1.16171	0.537371	2.16183	1.11226	5.58351e-17	1.04163e-15
P24941	CDK2	Cyclin-dependent kinase 2	14	T	1.16171	0.537371	2.16183	1.11226	5.58351e-17	1.04163e-15
Q00526	CDK3	Cyclin-dependent kinase 3	14	T	1.16171	0.537371	2.16183	1.11226	5.58351e-17	1.04163e-15
Q8IVF2	AHNAK2	Protein AHNAK2	1172	S	0.393916	1.01491	0.388128	-1.36539	5.58351e-17	1.04163e-15
Q15746	MYLK	Myosin light chain kinase, smooth muscle	1617	S	1.96542	7.81677	0.251437	-1.99173	5.58351e-17	1.04163e-15
Q8TC92	ENOX1	Ecto-NOX disulfide-thiol exchanger 1	403	S	1.30721	2.57367	0.507918	-0.977333	5.72472e-17	1.06685e-15
P49321	NASP	Nuclear autoantigenic sperm protein	421	S	1.53894	0.54433	2.82721	1.49938	5.86944e-17	1.09039e-15
Q9HBL0	TNS1	Tensin-1	1177	S	1.1456	1.80377	0.635112	-0.654918	5.86944e-17	1.09039e-15
Q9NR12	PDLIM7	PDZ and LIM domain protein 7	274	S	1.22744	2.06355	0.594818	-0.74948	5.86944e-17	1.09039e-15
Q96T37	RBM15	RNA-binding protein 15	670	S	0.943761	0.624289	1.51174	0.596208	6.01778e-17	1.11213e-15
P42677	RPS27	40S ribosomal protein S27	11	S	0.674817	0.452719	1.49059	0.57588	6.01778e-17	1.11213e-15
Q9UJK0	TSR3	Ribosome biogenesis protein TSR3 homolog	259	S	1.4986	1.04565	1.43317	0.519214	6.01778e-17	1.11213e-15
Q8NC44	RETREG2	Reticulophagy regulator 2	385	S	0.773977	1.49642	0.517218	-0.951157	6.01778e-17	1.11213e-15
Q9H3H1	TRIT1	tRNA dimethylallyltransferase	455	S	0.530946	0.297892	1.78235	0.833777	6.16981e-17	1.13668e-15
P30411	BDKRB2	B2 bradykinin receptor	373	S	0.777885	1.73835	0.447484	-1.16009	6.16981e-17	1.13668e-15
Q9Y5S1	TRPV2	Transient receptor potential cation channel subfamily V member 2	751	S	4.36405	10.0627	0.433685	-1.20528	6.16981e-17	1.13668e-15
Q8TDB6	DTX3L	E3 ubiquitin-protein ligase DTX3L	221	S	4.9736	1.87503	2.65254	1.40738	6.32563e-17	1.15698e-15
Q9Y2F5	ICE1	Little elongation complex subunit 1	1712	S	1.3476	0.619723	2.17451	1.12069	6.32563e-17	1.15698e-15
Q14839	CHD4	Chromodomain-helicase-DNA-binding protein 4	1576	S	1.42009	0.908754	1.56268	0.644022	6.32563e-17	1.15698e-15
O60271	SPAG9	C-Jun-amino-terminal kinase-interacting protein 4	203	S	0.318385	0.59621	0.534014	-0.90505	6.32563e-17	1.15698e-15
P68133	ACTA1	Actin, alpha skeletal muscle	241	S	1.23914	3.10247	0.399406	-1.32407	6.32563e-17	1.15698e-15
Q14315	FLNC	Filamin-C	954	S	2.77837	11.0196	0.252129	-1.98777	6.32563e-17	1.15698e-15
Q96MM6	HSPA12B	Heat shock 70 kDa protein 12B	434	S	1.67829	6.72617	0.249516	-2.00279	6.32563e-17	1.15698e-15
O00499	BIN1	Myc box-dependent-interacting protein 1	298	S	1.13915	1.74732	0.651941	-0.617187	6.48532e-17	1.17891e-15
P02545	LMNA	Prelamin-A/C	66	S	1.65542	2.65969	0.622412	-0.684058	6.48532e-17	1.17891e-15
A6QL63	BTBD11	Ankyrin repeat and BTB/POZ domain-containing protein BTBD11	526	S	1.91673	6.47818	0.295875	-1.75694	6.48532e-17	1.17891e-15
Q8IXT5	RBM12B	RNA-binding protein 12B	278	S	1.45401	0.787247	1.84696	0.885152	6.649e-17	1.20373e-15
Q12888	TP53BP1	TP53-binding protein 1	1068	S	1.46944	0.940948	1.56166	0.643081	6.649e-17	1.20373e-15
P18887	XRCC1	DNA repair protein XRCC1	453	T	1.29836	0.873965	1.48559	0.571039	6.649e-17	1.20373e-15
O96007	MOCS2	Molybdopterin synthase catalytic subunit	20	S	0.717275	1.35088	0.530968	-0.913304	6.649e-17	1.20373e-15
O14929	HAT1	Histone acetyltransferase type B catalytic subunit	361	S	0.828362	0.188696	4.38994	2.1342	6.81674e-17	1.2266e-15
Q8IXT5	RBM12B	RNA-binding protein 12B	280	S	1.46125	0.822362	1.7769	0.829361	6.81674e-17	1.2266e-15
Q04721	NOTCH2	Neurogenic locus notch homolog protein 2	1778	S	0.833001	1.2708	0.655496	-0.609341	6.81674e-17	1.2266e-15
Q86TV6	TTC7B	Tetratricopeptide repeat protein 7B	678	S	1.62966	3.51331	0.463854	-1.10826	6.81674e-17	1.2266e-15
O60504	SORBS3	Vinexin	545	S	1.22721	3.09956	0.39593	-1.33668	6.81674e-17	1.2266e-15
Q9UMS6	SYNPO2	Synaptopodin-2	363	S	1.01501	3.59542	0.282307	-1.82466	6.81674e-17	1.2266e-15
O43182	ARHGAP6	Rho GTPase-activating protein 6	37	S	1.27035	2.06149	0.616232	-0.698454	6.98866e-17	1.25372e-15
Q9Y2D5	AKAP2	A-kinase anchor protein 2	720	S	0.344709	0.70472	0.489144	-1.03167	6.98866e-17	1.25372e-15
Q9UN36	NDRG2	Protein NDRG2	328	S	1.26494	2.61739	0.483284	-1.04906	6.98866e-17	1.25372e-15
O75526	RBMXL2	RNA-binding motif protein, X-linked-like-2	58	S	0.749275	0.432347	1.73304	0.793306	7.16485e-17	1.27631e-15
P38159	RBMX	RNA-binding motif protein, X chromosome	58	S	0.749275	0.432347	1.73304	0.793306	7.16485e-17	1.27631e-15
Q8N7X1	RBMXL3	RNA-binding motif protein, X-linked-like-3	58	S	0.749275	0.432347	1.73304	0.793306	7.16485e-17	1.27631e-15
Q96E39	RBMXL1	RNA binding motif protein, X-linked-like-1	58	S	0.749275	0.432347	1.73304	0.793306	7.16485e-17	1.27631e-15
Q6PJT7	ZC3H14	Zinc finger CCCH domain-containing protein 14	515	S	0.924536	0.63503	1.45589	0.541905	7.16485e-17	1.27631e-15
Q15746	MYLK	Myosin light chain kinase, smooth muscle	1438	S	1.49068	3.07742	0.484392	-1.04575	7.16485e-17	1.27631e-15
P07197	NEFM	Neurofilament medium polypeptide	736	S	1.26603	11.6625	0.108556	-3.20349	7.16485e-17	1.27631e-15
Q9NZQ7	CD274	Programmed cell death 1 ligand 1	283	S	4.2949	1.83637	2.3388	1.22577	7.53048e-17	1.32812e-15
P50613	CDK7	Cyclin-dependent kinase 7	164	S	1.1725	0.689054	1.70161	0.766904	7.53048e-17	1.32812e-15
Q86WC4	OSTM1	Osteopetrosis-associated transmembrane protein 1	325	S	0.406609	0.635048	0.640281	-0.643223	7.53048e-17	1.32812e-15
Q96N67	DOCK7	Dedicator of cytokinesis protein 7	439	S	0.224861	0.403725	0.556967	-0.844337	7.53048e-17	1.32812e-15
Q9NQC3	RTN4	Reticulon-4	181	S	1.29771	2.35067	0.552062	-0.857099	7.53048e-17	1.32812e-15
Q9BW61	DDA1	DET1- and DDB1-associated protein 1	33	S	0.559734	1.06529	0.525426	-0.92844	7.53048e-17	1.32812e-15
Q8IYU2	HACE1	E3 ubiquitin-protein ligase HACE1	385	S	1.29591	2.62751	0.493208	-1.01973	7.53048e-17	1.32812e-15
Q8TD19	NEK9	Serine/threonine-protein kinase Nek9	254	T	1.78942	4.78315	0.374109	-1.41847	7.53048e-17	1.32812e-15
Q01118	SCN7A	Sodium channel protein type 7 subunit alpha	911	S	0.927988	2.89712	0.320314	-1.64244	7.53048e-17	1.32812e-15
P49321	NASP	Nuclear autoantigenic sperm protein	451	S	1.55388	0.812128	1.91334	0.936093	7.72013e-17	1.35484e-15
O75400	PRPF40A	Pre-mRNA-processing factor 40 homolog A	933	S	1.6227	0.965617	1.68048	0.748874	7.72013e-17	1.35484e-15
Q9HAW0	BRF2	Transcription factor IIIB 50 kDa subunit	353	S	1.15238	0.70395	1.63702	0.711076	7.72013e-17	1.35484e-15
P46821	MAP1B	Microtubule-associated protein 1B	1788	T	0.211245	0.312632	0.675701	-0.565543	7.72013e-17	1.35484e-15
Q9NR12	PDLIM7	PDZ and LIM domain protein 7	260	S	0.317827	0.510016	0.62317	-0.682302	7.72013e-17	1.35484e-15
P40306	PSMB10	Proteasome subunit beta type-10	230	S	3.39344	1.81161	1.87316	0.905476	7.9145e-17	1.37941e-15
Q5T8D3	ACBD5	Acyl-CoA-binding domain-containing protein 5	200	S	1.34407	0.765865	1.75498	0.811452	7.9145e-17	1.37941e-15
Q8WVC0	LEO1	RNA polymerase-associated protein LEO1	277	S	1.4181	0.951393	1.49056	0.57585	7.9145e-17	1.37941e-15
Q14643	ITPR1	Inositol 1,4,5-trisphosphate receptor type 1	1764	S	1.07014	2.03296	0.526395	-0.925781	7.9145e-17	1.37941e-15
Q96K83	ZNF521	Zinc finger protein 521	608	S	1.65298	3.94612	0.418889	-1.25536	7.9145e-17	1.37941e-15
Q13425	SNTB2	Beta-2-syntrophin	222	S	1.17123	3.02935	0.386628	-1.37098	7.9145e-17	1.37941e-15
P21333	FLNA	Filamin-A	189	S	1.78684	7.8995	0.226197	-2.14435	7.9145e-17	1.37941e-15
Q02543	RPL18A	60S ribosomal protein L18a	71	S	1.64074	0.9725	1.68713	0.754574	8.11368e-17	1.41135e-15
Q9NVU0	POLR3E	DNA-directed RNA polymerase III subunit RPC5	161	S	1.1006	0.759887	1.44837	0.534427	8.11368e-17	1.41135e-15
P49019	HCAR3	Hydroxycarboxylic acid receptor 3	328	S	2.66957	1.18587	2.25114	1.17065	8.31781e-17	1.43841e-15
Q7L2J0	MEPCE	7SK snRNA methylphosphate capping enzyme	330	S	0.49308	0.856807	0.575485	-0.79715	8.31781e-17	1.43841e-15
P46821	MAP1B	Microtubule-associated protein 1B	1262	S	0.525072	0.957772	0.548223	-0.867166	8.31781e-17	1.43841e-15
P27987	ITPKB	Inositol-trisphosphate 3-kinase B	65	S	0.953581	1.74639	0.546029	-0.87295	8.31781e-17	1.43841e-15
Q8TAD7	OCC1	Overexpressed in colon carcinoma 1 protein	28	S	1.55193	3.25884	0.476223	-1.07029	8.31781e-17	1.43841e-15
P12277	CKB	Creatine kinase B-type	4	S	0.699086	2.22177	0.314652	-1.66817	8.31781e-17	1.43841e-15
P02671	FGA	Fibrinogen alpha chain	524	S	1.2546	3.55342	0.353067	-1.50198	8.527e-17	1.47315e-15
Q8IVF2	AHNAK2	Protein AHNAK2	5175	S	0.988841	1.88633	0.524214	-0.931773	8.74138e-17	1.50433e-15
Q14515	SPARCL1	SPARC-like protein 1	92	S	1.51106	4.09324	0.369159	-1.43769	8.74138e-17	1.50433e-15
P07197	NEFM	Neurofilament medium polypeptide	783	S	1.61318	4.7154	0.34211	-1.54747	8.74138e-17	1.50433e-15
P09651	HNRNPA1	Heterogeneous nuclear ribonucleoprotein A1	6	S	1.33899	0.882579	1.51713	0.601349	8.96107e-17	1.53322e-15
Q9BZF1	OSBPL8	Oxysterol-binding protein-related protein 8	807	S	2.29038	1.59772	1.43353	0.51957	8.96107e-17	1.53322e-15
Q9BR39	JPH2	Junctophilin-2	486	S	0.93838	1.55667	0.602811	-0.730222	8.96107e-17	1.53322e-15
O94885	SASH1	SAM and SH3 domain-containing protein 1	387	S	1.61879	2.83013	0.571985	-0.80595	8.96107e-17	1.53322e-15
Q01082	SPTBN1	Spectrin beta chain, non-erythrocytic 1	257	S	1.67306	4.14802	0.403339	-1.30994	8.96107e-17	1.53322e-15
Q01484	ANK2	Ankyrin-2	2315	S	0.773932	3.28251	0.235774	-2.08452	8.96107e-17	1.53322e-15
Q9NZM1	MYOF	Myoferlin	1915	S	1.03092	0.611819	1.68501	0.752756	9.18621e-17	1.57023e-15
Q8IYB3	SRRM1	Serine/arginine repetitive matrix protein 1	290	S	1.94481	0.369683	5.26077	2.39527	9.41692e-17	1.59889e-15
Q9UKL3	CASP8AP2	CASP8-associated protein 2	1537	S	1.05337	0.34545	3.04928	1.60847	9.41692e-17	1.59889e-15
P13051	UNG	Uracil-DNA glycosylase	23	S	0.804674	0.46109	1.74515	0.803355	9.41692e-17	1.59889e-15
Q12789	GTF3C1	General transcription factor 3C polypeptide 1	1068	S	1.90814	1.26889	1.50378	0.588598	9.41692e-17	1.59889e-15
Q96LT9	RNPC3	RNA-binding region-containing protein 3	108	S	2.33519	1.57527	1.48241	0.56794	9.41692e-17	1.59889e-15
Q09472	EP300	Histone acetyltransferase p300	1038	S	1.64388	1.12662	1.45912	0.545095	9.41692e-17	1.59889e-15
Q0JRZ9	FCHO2	F-BAR domain only protein 2	488	S	1.31137	1.92378	0.681664	-0.552867	9.41692e-17	1.59889e-15
Q9UIG0	BAZ1B	Tyrosine-protein kinase BAZ1B	160	S	0.507884	0.312105	1.62729	0.70247	9.65334e-17	1.63747e-15
Q96T23	RSF1	Remodeling and spacing factor 1	397	S	0.352527	0.204221	1.7262	0.787602	9.89561e-17	1.67377e-15
Q14693	LPIN1	Phosphatidate phosphatase LPIN1	162	S	0.37686	0.945298	0.398668	-1.32674	9.89561e-17	1.67377e-15
P78559	MAP1A	Microtubule-associated protein 1A	1146	S	1.23397	3.35536	0.367762	-1.44316	9.89561e-17	1.67377e-15
Q9Y448	KNSTRN	Small kinetochore-associated protein	171	S	0.469644	0.206366	2.27578	1.18636	1.01439e-16	1.70925e-15
Q9Y6X9	MORC2	ATPase MORC2	725	S	0.598919	0.387659	1.54496	0.627573	1.01439e-16	1.70925e-15
O00267	SUPT5H	Transcription elongation factor SPT5	666	S	0.537244	0.95792	0.560844	-0.834329	1.01439e-16	1.70925e-15
P78559	MAP1A	Microtubule-associated protein 1A	1172	S	1.28739	3.12859	0.411491	-1.28107	1.01439e-16	1.70925e-15
Q01196	RUNX1	Runt-related transcription factor 1	212	S	2.05592	1.05591	1.94705	0.96129	1.03983e-16	1.7455e-15
Q15036	SNX17	Sorting nexin-17	437	S	0.180188	0.37314	0.482896	-1.05022	1.03983e-16	1.7455e-15
Q96CX2	KCTD12	BTB/POZ domain-containing protein KCTD12	217	S	1.17595	2.55499	0.460255	-1.11949	1.03983e-16	1.7455e-15
A6QL63	BTBD11	Ankyrin repeat and BTB/POZ domain-containing protein BTBD11	521	S	1.91673	6.47818	0.295875	-1.75694	1.03983e-16	1.7455e-15
Q92922	SMARCC1	SWI/SNF complex subunit SMARCC1	310	S	0.837478	0.525392	1.59401	0.672656	1.0659e-16	1.78252e-15
Q8TEQ6	GEMIN5	Gem-associated protein 5	1311	S	0.730154	1.08923	0.670339	-0.577038	1.0659e-16	1.78252e-15
Q14938	NFIX	Nuclear factor 1 X-type	267	T	0.952681	2.02382	0.470734	-1.08701	1.0659e-16	1.78252e-15
Q01082	SPTBN1	Spectrin beta chain, non-erythrocytic 1	999	T	0.567621	1.35274	0.419607	-1.25289	1.0659e-16	1.78252e-15
P26358	DNMT1	DNA (cytosine-5)-methyltransferase 1	714	S	0.907087	0.597095	1.51917	0.603281	1.09261e-16	1.82034e-15
P40189	IL6ST	Interleukin-6 receptor subunit beta	667	S	0.874083	1.37545	0.635488	-0.654062	1.09261e-16	1.82034e-15
Q0ZGT2	NEXN	Nexilin	569	S	1.6322	3.33587	0.489289	-1.03124	1.09261e-16	1.82034e-15
P51636	CAV2	Caveolin-2	23	S	0.801084	2.215	0.361663	-1.46728	1.09261e-16	1.82034e-15
Q9NZL4	HSPBP1	Hsp70-binding protein 1	351	S	0.749815	1.16281	0.644832	-0.633005	1.11999e-16	1.86245e-15
Q9HBL0	TNS1	Tensin-1	366	Y	1.54252	2.57498	0.599043	-0.739269	1.11999e-16	1.86245e-15
Q96GX9	APIP	Methylthioribulose-1-phosphate dehydratase	87	S	1.16633	0.573041	2.03534	1.02527	1.14803e-16	1.90374e-15
Q96N67	DOCK7	Dedicator of cytokinesis protein 7	910	S	0.932623	1.36166	0.684914	-0.546005	1.14803e-16	1.90374e-15
Q9BX66	SORBS1	Sorbin and SH3 domain-containing protein 1	465	S	0.947659	2.45259	0.386392	-1.37186	1.14803e-16	1.90374e-15
P09874	PARP1	Poly [ADP-ribose] polymerase 1	782	S	1.48681	0.688082	2.1608	1.11157	1.17678e-16	1.94053e-15
Q68DK7	MSL1	Male-specific lethal 1 homolog	205	S	2.31275	1.49332	1.54873	0.631088	1.17678e-16	1.94053e-15
P35712	SOX6	Transcription factor SOX-6	126	S	0.127644	0.2624	0.486448	-1.03964	1.17678e-16	1.94053e-15
Q9Y490	TLN1	Talin-1	979	S	2.44458	6.22526	0.392688	-1.34855	1.17678e-16	1.94053e-15
P01024	C3	Complement C3	1321	S	1.99659	6.2114	0.32144	-1.63738	1.17678e-16	1.94053e-15
Q8IYD8	FANCM	Fanconi anemia group M protein	34	S	0.767764	0.298859	2.56898	1.3612	1.20623e-16	1.98358e-15
Q13464	ROCK1	Rho-associated protein kinase 1	1105	S	0.940784	1.36346	0.689996	-0.535341	1.20623e-16	1.98358e-15
P62736	ACTA2	Actin, aortic smooth muscle	205	T	0.846736	3.06999	0.275811	-1.85825	1.20623e-16	1.98358e-15
Q7Z417	NUFIP2	Nuclear fragile X mental retardation-interacting protein 2	652	S	0.909083	0.536771	1.69361	0.760105	1.23641e-16	2.02383e-15
Q5BKX5	C19orf54	UPF0692 protein C19orf54	14	S	0.633769	0.444941	1.42439	0.510343	1.23641e-16	2.02383e-15
Q01082	SPTBN1	Spectrin beta chain, non-erythrocytic 1	2165	S	1.31843	2.09702	0.628713	-0.669527	1.23641e-16	2.02383e-15
Q9Y467	SALL2	Sal-like protein 2	806	S	0.622868	1.27198	0.489686	-1.03007	1.23641e-16	2.02383e-15
Q9Y467	SALL2	Sal-like protein 2	802	S	0.750106	1.58804	0.472346	-1.08208	1.23641e-16	2.02383e-15
Q9H6Y2	WDR55	WD repeat-containing protein 55	382	S	0.656145	0.30507	2.15081	1.10488	1.26733e-16	2.06493e-15
Q92890	UFD1	Ubiquitin recognition factor in ER-associated degradation protein 1	247	S	0.640551	0.32385	1.97793	0.983989	1.26733e-16	2.06493e-15
Q15696	ZRSR2	U2 small nuclear ribonucleoprotein auxiliary factor 35 kDa subunit-related protein 2	384	S	0.531113	0.316772	1.67664	0.745576	1.26733e-16	2.06493e-15
Q9BXW9	FANCD2	Fanconi anemia group D2 protein	592	S	0.656715	0.416337	1.57736	0.657516	1.26733e-16	2.06493e-15
Q02952	AKAP12	A-kinase anchor protein 12	1674	S	1.02177	1.81837	0.561917	-0.831572	1.26733e-16	2.06493e-15
Q9H8Y5	ANKZF1	Ankyrin repeat and zinc finger domain-containing protein 1	361	S	0.515822	0.245833	2.09826	1.06919	1.29901e-16	2.11268e-15
Q13103	SPP2	Secreted phosphoprotein 24	96	S	1.59426	3.67026	0.434371	-1.203	1.29901e-16	2.11268e-15
Q9NR12	PDLIM7	PDZ and LIM domain protein 7	259	T	0.310813	0.485927	0.63963	-0.644691	1.36474e-16	2.21755e-15
P20645	M6PR	Cation-dependent mannose-6-phosphate receptor	267	S	1.04954	1.51244	0.693937	-0.527123	1.39883e-16	2.26878e-15
Q9Y5K6	CD2AP	CD2-associated protein	514	S	0.878837	0.508734	1.7275	0.788684	1.43375e-16	2.32119e-15
P18031	PTPN1	Tyrosine-protein phosphatase non-receptor type 1	295	S	1.61792	1.04896	1.54241	0.625184	1.43375e-16	2.32119e-15
O43823	AKAP8	A-kinase anchor protein 8	339	S	0.899017	0.623435	1.44204	0.528109	1.46953e-16	2.37047e-15
Q8IWZ3	ANKHD1	Ankyrin repeat and KH domain-containing protein 1	2281	S	1.5448	2.19424	0.704025	-0.506302	1.46953e-16	2.37047e-15
Q8IY67	RAVER1	Ribonucleoprotein PTB-binding 1	463	T	0.429399	0.650288	0.660321	-0.59876	1.46953e-16	2.37047e-15
Q8NB49	ATP11C	Phospholipid-transporting ATPase IG	445	S	0.276786	0.566836	0.4883	-1.03416	1.46953e-16	2.37047e-15
Q96RK0	CIC	Protein capicua homolog	1418	S	5.09675	2.24781	2.26743	1.18106	1.5062e-16	2.42521e-15
Q9UQ35	SRRM2	Serine/arginine repetitive matrix protein 2	778	S	1.33615	0.906036	1.47472	0.560446	1.5062e-16	2.42521e-15
Q6ZV73	FGD6	FYVE, RhoGEF and PH domain-containing protein 6	1197	S	1.20129	0.786864	1.52668	0.610402	1.54376e-16	2.47671e-15
Q9NQC3	RTN4	Reticulon-4	184	S	1.28773	1.98579	0.64847	-0.624889	1.54376e-16	2.47671e-15
O94929	ABLIM3	Actin-binding LIM protein 3	503	S	0.878079	1.41628	0.61999	-0.689684	1.54376e-16	2.47671e-15
Q14938	NFIX	Nuclear factor 1 X-type	280	S	2.01523	3.49257	0.577003	-0.793348	1.54376e-16	2.47671e-15
Q03188	CENPC	Centromere protein C	225	S	0.874814	0.517458	1.6906	0.757534	1.58225e-16	2.52932e-15
P42858	HTT	Huntingtin	419	S	1.19894	1.82243	0.657883	-0.604098	1.58225e-16	2.52932e-15
Q15149	PLEC	Plectin	4385	S	0.941054	1.57753	0.596535	-0.745321	1.58225e-16	2.52932e-15
Q15111	PLCL1	Inactive phospholipase C-like protein 1	569	S	1.53444	3.6402	0.421525	-1.24631	1.58225e-16	2.52932e-15
Q6UB99	ANKRD11	Ankyrin repeat domain-containing protein 11	276	S	0.672497	0.393199	1.71032	0.774269	1.62168e-16	2.58074e-15
P51532	SMARCA4	Transcription activator BRG1	613	S	2.25524	1.4749	1.52908	0.612663	1.62168e-16	2.58074e-15
Q9BQJ4	TMEM47	Transmembrane protein 47	6	S	1.11289	2.10954	0.527552	-0.922615	1.62168e-16	2.58074e-15
Q14152	EIF3A	Eukaryotic translation initiation factor 3 subunit A	584	S	0.427535	1.07934	0.396109	-1.33603	1.62168e-16	2.58074e-15
Q8NHJ6	LILRB4	Leukocyte immunoglobulin-like receptor subfamily B member 4	318	S	2.65636	1.42113	1.86918	0.902407	1.66208e-16	2.63559e-15
O75909	CCNK	Cyclin-K	324	S	1.59637	1.06153	1.50384	0.58865	1.66208e-16	2.63559e-15
P41212	ETV6	Transcription factor ETV6	203	S	1.70179	1.14154	1.49079	0.576077	1.66208e-16	2.63559e-15
Q8N4C8	MINK1	Misshapen-like kinase 1	993	S	0.150877	0.258071	0.584634	-0.774395	1.66208e-16	2.63559e-15
Q9BY12	SCAPER	S phase cyclin A-associated protein in the endoplasmic reticulum	86	S	0.682917	0.246831	2.76673	1.46818	1.70348e-16	2.68207e-15
P16144	ITGB4	Integrin beta-4	1696	S	2.72742	1.44939	1.88178	0.912096	1.70348e-16	2.68207e-15
P42166	TMPO	Lamina-associated polypeptide 2, isoform alpha	74	T	0.970511	1.40866	0.688962	-0.537504	1.70348e-16	2.68207e-15
P42167	TMPO	Lamina-associated polypeptide 2, isoforms beta/gamma	74	T	0.970511	1.40866	0.688962	-0.537504	1.70348e-16	2.68207e-15
Q8WX93	PALLD	Palladin	1118	S	1.89222	4.72404	0.400552	-1.31994	1.70348e-16	2.68207e-15
Q9Y6F6	MRVI1	Protein MRVI1	481	S	3.58161	10.0255	0.357248	-1.485	1.70348e-16	2.68207e-15
Q9BRG2	SH2D3A	SH2 domain-containing protein 3A	180	S	3.91617	1.50936	2.59459	1.37551	1.74588e-16	2.73671e-15
P49761	CLK3	Dual specificity protein kinase CLK3	224	S	1.03564	0.731592	1.41559	0.501406	1.74588e-16	2.73671e-15
Q9UJV9	DDX41	Probable ATP-dependent RNA helicase DDX41	23	S	0.287338	0.412723	0.696201	-0.522424	1.74588e-16	2.73671e-15
Q9HBL0	TNS1	Tensin-1	1446	S	1.44378	2.98866	0.483087	-1.04965	1.74588e-16	2.73671e-15
P78559	MAP1A	Microtubule-associated protein 1A	612	S	0.891212	1.81704	0.490474	-1.02775	1.78933e-16	2.79741e-15
Q9UHB6	LIMA1	LIM domain and actin-binding protein 1	490	S	1.97748	0.934083	2.11703	1.08204	1.83385e-16	2.84696e-15
Q9UDY2	TJP2	Tight junction protein ZO-2	294	S	3.20491	1.89524	1.69103	0.757901	1.83385e-16	2.84696e-15
O14647	CHD2	Chromodomain-helicase-DNA-binding protein 2	1369	S	0.838127	0.545178	1.53735	0.620442	1.83385e-16	2.84696e-15
P16383	GCFC2	GC-rich sequence DNA-binding factor 2	214	S	1.04336	0.715559	1.4581	0.544088	1.83385e-16	2.84696e-15
Q6T4R5	NHS	Nance-Horan syndrome protein	415	S	1.10085	1.65452	0.66536	-0.587792	1.83385e-16	2.84696e-15
Q13425	SNTB2	Beta-2-syntrophin	110	S	1.52237	2.38003	0.639643	-0.644661	1.83385e-16	2.84696e-15
O60271	SPAG9	C-Jun-amino-terminal kinase-interacting protein 4	217	T	0.384777	0.63246	0.608382	-0.716951	1.83385e-16	2.84696e-15
P78559	MAP1A	Microtubule-associated protein 1A	616	T	0.651986	1.51817	0.429455	-1.21942	1.83385e-16	2.84696e-15
P08670	VIM	Vimentin	214	S	1.52188	2.45235	0.620582	-0.688306	1.87946e-16	2.90759e-15
Q9P0K7	RAI14	Ankycorbin	293	S	0.509605	0.873437	0.583448	-0.777324	1.87946e-16	2.90759e-15
P00519	ABL1	Tyrosine-protein kinase ABL1	185	Y	1.75122	3.65035	0.47974	-1.05967	1.87946e-16	2.90759e-15
Q53EZ4	CEP55	Centrosomal protein of 55 kDa	430	T	0.962831	0.381003	2.52709	1.33748	1.92618e-16	2.96696e-15
Q9Y618	NCOR2	Nuclear receptor corepressor 2	956	S	0.396618	0.218086	1.81863	0.862852	1.92618e-16	2.96696e-15
P98082	DAB2	Disabled homolog 2	316	S	0.358115	0.865236	0.413893	-1.27267	1.92618e-16	2.96696e-15
P12036	NEFH	Neurofilament heavy polypeptide	782	S	0.482964	1.18817	0.406478	-1.29875	1.92618e-16	2.96696e-15
O95810	CAVIN2	Caveolae-associated protein 2	293	S	1.22058	5.79796	0.210518	-2.24798	1.92618e-16	2.96696e-15
P62316	SNRPD2	Small nuclear ribonucleoprotein Sm D2	12	T	1.17392	0.825916	1.42135	0.507267	1.97405e-16	3.02495e-15
Q6H8Q1	ABLIM2	Actin-binding LIM protein 2	279	S	1.899	2.82988	0.671054	-0.5755	1.97405e-16	3.02495e-15
P27815	PDE4A	cAMP-specific 3',5'-cyclic phosphodiesterase 4A	145	S	0.230837	0.366234	0.630299	-0.665892	1.97405e-16	3.02495e-15
Q07343	PDE4B	cAMP-specific 3',5'-cyclic phosphodiesterase 4B	133	S	0.230837	0.366234	0.630299	-0.665892	1.97405e-16	3.02495e-15
Q08493	PDE4C	cAMP-specific 3',5'-cyclic phosphodiesterase 4C	119	S	0.230837	0.366234	0.630299	-0.665892	1.97405e-16	3.02495e-15
Q08499	PDE4D	cAMP-specific 3',5'-cyclic phosphodiesterase 4D	190	S	0.230837	0.366234	0.630299	-0.665892	1.97405e-16	3.02495e-15
P29558	RBMS1	RNA-binding motif, single-stranded-interacting protein 1	112	S	0.287584	0.153958	1.86794	0.901447	2.02309e-16	3.08678e-15
Q07157	TJP1	Tight junction protein ZO-1	175	S	0.761562	1.5513	0.49092	-1.02644	2.02309e-16	3.08678e-15
Q9UK55	SERPINA10	Protein Z-dependent protease inhibitor	61	S	1.6011	3.9554	0.404788	-1.30476	2.02309e-16	3.08678e-15
Q13595	TRA2A	Transformer-2 protein homolog alpha	236	S	0.186773	0.473048	0.394829	-1.3407	2.02309e-16	3.08678e-15
Q53GG5	PDLIM3	PDZ and LIM domain protein 3	18	S	1.66472	4.96621	0.33521	-1.57686	2.07334e-16	3.16073e-15
Q86XP3	DDX42	ATP-dependent RNA helicase DDX42	183	Y	0.79298	0.508766	1.55863	0.640282	2.12481e-16	3.23088e-15
O14647	CHD2	Chromodomain-helicase-DNA-binding protein 2	1373	S	0.852482	0.557941	1.52791	0.611558	2.12481e-16	3.23088e-15
Q92610	ZNF592	Zinc finger protein 592	348	S	1.53846	1.07322	1.43349	0.519535	2.12481e-16	3.23088e-15
Q9NRG9	AAAS	Aladin	495	S	1.05711	0.512486	2.06272	1.04455	2.17754e-16	3.29694e-15
Q6ZRV2	FAM83H	Protein FAM83H	914	S	1.47486	0.837119	1.76183	0.817073	2.17754e-16	3.29694e-15
Q14147	DHX34	Probable ATP-dependent RNA helicase DHX34	750	S	0.95943	0.623675	1.53835	0.621383	2.17754e-16	3.29694e-15
Q9H7L9	SUDS3	Sin3 histone deacetylase corepressor complex component SDS3	53	S	1.14534	0.790804	1.44832	0.534381	2.17754e-16	3.29694e-15
Q96B97	SH3KBP1	SH3 domain-containing kinase-binding protein 1	230	S	2.32219	4.99465	0.464935	-1.1049	2.17754e-16	3.29694e-15
Q9H7F0	ATP13A3	Probable cation-transporting ATPase 13A3	817	S	1.84846	1.21818	1.5174	0.601599	2.23156e-16	3.36725e-15
Q5VUA4	ZNF318	Zinc finger protein 318	1238	S	0.866852	0.612038	1.41634	0.502163	2.23156e-16	3.36725e-15
Q9BSJ8	ESYT1	Extended synaptotagmin-1	1009	Y	4.28864	8.43957	0.508158	-0.97665	2.23156e-16	3.36725e-15
Q9Y4J8	DTNA	Dystrobrevin alpha	641	S	1.16795	1.88228	0.620496	-0.688505	2.28691e-16	3.43907e-15
P46821	MAP1B	Microtubule-associated protein 1B	1067	T	0.27489	0.489633	0.561421	-0.832846	2.28691e-16	3.43907e-15
P16070	CD44	CD44 antigen	704	S	1.64166	3.00757	0.545843	-0.873442	2.28691e-16	3.43907e-15
P46821	MAP1B	Microtubule-associated protein 1B	1949	T	0.376956	0.741322	0.508491	-0.975705	2.28691e-16	3.43907e-15
P27694	RPA1	Replication protein A 70 kDa DNA-binding subunit	384	S	0.868298	0.401213	2.16418	1.11382	2.3436e-16	3.51837e-15
Q86UU1	PHLDB1	Pleckstrin homology-like domain family B member 1	563	S	0.595666	1.14526	0.520116	-0.943096	2.3436e-16	3.51837e-15
Q8NHJ6	LILRB4	Leukocyte immunoglobulin-like receptor subfamily B member 4	319	S	2.22307	1.34346	1.65473	0.7266	2.40168e-16	3.59039e-15
Q6KC79	NIPBL	Nipped-B-like protein	2490	S	1.74581	1.10692	1.57718	0.657343	2.40168e-16	3.59039e-15
Q9UDY2	TJP2	Tight junction protein ZO-2	174	S	1.14584	0.729805	1.57006	0.65082	2.40168e-16	3.59039e-15
O94819	KBTBD11	Kelch repeat and BTB domain-containing protein 11	314	S	1.48435	3.92427	0.378248	-1.4026	2.40168e-16	3.59039e-15
Q14315	FLNC	Filamin-C	2236	S	0.484094	1.79205	0.270134	-1.88825	2.40168e-16	3.59039e-15
Q53HL2	CDCA8	Borealin	219	S	0.57529	0.393291	1.46276	0.548692	2.46118e-16	3.67315e-15
P30086	PEBP1	Phosphatidylethanolamine-binding protein 1	52	S	1.60606	2.92659	0.548782	-0.865694	2.46118e-16	3.67315e-15
Q13247	SRSF6	Serine/arginine-rich splicing factor 6	316	S	1.41579	0.950555	1.48944	0.574769	2.52213e-16	3.75465e-15
P78559	MAP1A	Microtubule-associated protein 1A	1818	S	1.26123	1.90015	0.663752	-0.591284	2.52213e-16	3.75465e-15
Q96K83	ZNF521	Zinc finger protein 521	1016	S	0.817265	3.21174	0.254462	-1.97448	2.52213e-16	3.75465e-15
Q13761	RUNX3	Runt-related transcription factor 3	14	T	2.53734	1.31255	1.93314	0.950949	2.58457e-16	3.83474e-15
Q9UGL1	KDM5B	Lysine-specific demethylase 5B	1456	S	0.996602	0.609212	1.63589	0.710072	2.58457e-16	3.83474e-15
Q96BT3	CENPT	Centromere protein T	397	S	0.887744	0.563873	1.57437	0.654774	2.58457e-16	3.83474e-15
Q9H223	EHD4	EH domain-containing protein 4	376	S	1.74255	7.13749	0.244141	-2.03421	2.58457e-16	3.83474e-15
Q92598	HSPH1	Heat shock protein 105 kDa	809	S	2.78723	1.59725	1.74502	0.80324	2.64853e-16	3.90355e-15
Q9UGU5	HMGXB4	HMG domain-containing protein 4	502	S	0.94536	0.613492	1.54095	0.623821	2.64853e-16	3.90355e-15
A8MVW0	FAM171A2	Protein FAM171A2	789	S	0.439983	0.642142	0.685181	-0.545443	2.64853e-16	3.90355e-15
Q14432	PDE3A	cGMP-inhibited 3',5'-cyclic phosphodiesterase A	311	T	0.2872	0.494491	0.580799	-0.78389	2.64853e-16	3.90355e-15
O95674	CDS2	Phosphatidate cytidylyltransferase 2	33	S	1.35989	2.82914	0.480674	-1.05687	2.64853e-16	3.90355e-15
Q15772	SPEG	Striated muscle preferentially expressed protein kinase	419	S	0.922491	2.53553	0.363826	-1.45868	2.64853e-16	3.90355e-15
Q92499	DDX1	ATP-dependent RNA helicase DDX1	481	S	1.76033	1.02327	1.72031	0.782666	2.71405e-16	3.9968e-15
Q96QE3	ATAD5	ATPase family AAA domain-containing protein 5	387	S	0.424367	0.220758	1.92232	0.94285	2.78116e-16	4.0821e-15
Q9UN36	NDRG2	Protein NDRG2	338	S	1.35308	2.01212	0.672467	-0.572464	2.78116e-16	4.0821e-15
Q9Y4G8	RAPGEF2	Rap guanine nucleotide exchange factor 2	960	S	0.374918	0.809195	0.463322	-1.10991	2.78116e-16	4.0821e-15
P13521	SCG2	Secretogranin-2	268	S	0.96039	3.7083	0.258984	-1.94907	2.78116e-16	4.0821e-15
Q9UBF8	PI4KB	Phosphatidylinositol 4-kinase beta	266	S	0.641125	0.360707	1.77741	0.829776	2.84992e-16	4.17267e-15
O14576	DYNC1I1	Cytoplasmic dynein 1 intermediate chain 1	179	S	1.49115	3.56503	0.41827	-1.25749	2.84992e-16	4.17267e-15
O60504	SORBS3	Vinexin	368	S	1.25017	3.2022	0.390412	-1.35693	2.84992e-16	4.17267e-15
Q6PD62	CTR9	RNA polymerase-associated protein CTR9 homolog	1097	S	1.02646	0.589615	1.74089	0.799829	2.92034e-16	4.27227e-15
Q9UDY2	TJP2	Tight junction protein ZO-2	296	S	3.20695	1.85262	1.73104	0.791636	2.99249e-16	4.35271e-15
Q00839	HNRNPU	Heterogeneous nuclear ribonucleoprotein U	271	S	1.08522	0.755461	1.43649	0.522552	2.99249e-16	4.35271e-15
Q9HB19	PLEKHA2	Pleckstrin homology domain-containing family A member 2	194	S	0.694159	1.28077	0.541987	-0.88367	2.99249e-16	4.35271e-15
Q9BR39	JPH2	Junctophilin-2	164	S	1.21419	2.54815	0.4765	-1.06945	2.99249e-16	4.35271e-15
Q9UBG0	MRC2	C-type mannose receptor 2	1457	S	1.51839	3.84039	0.395373	-1.33871	2.99249e-16	4.35271e-15
Q8IUX7	AEBP1	Adipocyte enhancer-binding protein 1	347	S	1.8724	5.36504	0.349	-1.5187	2.99249e-16	4.35271e-15
P29972	AQP1	Aquaporin-1	247	S	2.0295	6.26513	0.323936	-1.62622	2.99249e-16	4.35271e-15
Q9BX66	SORBS1	Sorbin and SH3 domain-containing protein 1	665	S	1.46828	2.19127	0.67006	-0.577637	3.06639e-16	4.44563e-15
P35222	CTNNB1	Catenin beta-1	552	S	0.866347	1.43051	0.605623	-0.723508	3.06639e-16	4.44563e-15
P02724	GYPA	Glycophorin-A	130	S	1.26887	2.76422	0.459033	-1.12333	3.06639e-16	4.44563e-15
P29536	LMOD1	Leiomodin-1	133	S	1.55049	4.95803	0.312722	-1.67705	3.06639e-16	4.44563e-15
P46013	MKI67	Proliferation marker protein Ki-67	2466	S	0.553175	0.324013	1.70726	0.771683	3.14208e-16	4.53686e-15
P46821	MAP1B	Microtubule-associated protein 1B	1438	S	0.462003	0.742354	0.622349	-0.684205	3.14208e-16	4.53686e-15
P61266	STX1B	Syntaxin-1B	14	S	0.644653	1.49141	0.432243	-1.21008	3.14208e-16	4.53686e-15
Q9Y490	TLN1	Talin-1	1878	S	1.37785	3.39136	0.406283	-1.29944	3.14208e-16	4.53686e-15
Q9UBG3	CRNN	Cornulin	180	S	1.21959	3.57032	0.341591	-1.54966	3.14208e-16	4.53686e-15
P78411	IRX5	Iroquois-class homeodomain protein IRX-5	185	S	1.37497	0.666971	2.06152	1.04371	3.21962e-16	4.61878e-15
Q99504	EYA3	Eyes absent homolog 3	269	T	0.763966	0.453468	1.68472	0.752506	3.21962e-16	4.61878e-15
P49792	RANBP2	E3 SUMO-protein ligase RanBP2	2280	S	1.14962	0.750358	1.53209	0.615502	3.21962e-16	4.61878e-15
Q7Z3J3	RGPD4	RanBP2-like and GRIP domain-containing protein 4	1305	S	1.14962	0.750358	1.53209	0.615502	3.21962e-16	4.61878e-15
P49792	RANBP2	E3 SUMO-protein ligase RanBP2	2276	S	0.717323	0.478884	1.49791	0.582948	3.21962e-16	4.61878e-15
Q7Z3J3	RGPD4	RanBP2-like and GRIP domain-containing protein 4	1301	S	0.717323	0.478884	1.49791	0.582948	3.21962e-16	4.61878e-15
Q8N3E9	PLCD3	1-phosphatidylinositol 4,5-bisphosphate phosphodiesterase delta-3	496	S	1.04963	1.73443	0.605176	-0.724574	3.21962e-16	4.61878e-15
Q9NZL6	RGL1	Ral guanine nucleotide dissociation stimulator-like 1	747	S	1.2481	2.77722	0.449407	-1.1539	3.21962e-16	4.61878e-15
Q9UDY2	TJP2	Tight junction protein ZO-2	986	S	1.2496	0.718368	1.73949	0.798668	3.29904e-16	4.71368e-15
P02545	LMNA	Prelamin-A/C	636	S	0.831069	1.27509	0.651774	-0.617557	3.29904e-16	4.71368e-15
Q96B36	AKT1S1	Proline-rich AKT1 substrate 1	246	T	0.0907065	0.173701	0.5222	-0.937326	3.29904e-16	4.71368e-15
Q07157	TJP1	Tight junction protein ZO-1	179	S	1.04181	2.2991	0.453139	-1.14197	3.29904e-16	4.71368e-15
Q03252	LMNB2	Lamin-B2	37	S	1.31235	2.03391	0.645234	-0.632105	3.3804e-16	4.82215e-15
P07951	TPM2	Tropomyosin beta chain	87	S	1.24733	2.5419	0.490709	-1.02706	3.46373e-16	4.9252e-15
P29536	LMOD1	Leiomodin-1	555	S	0.956284	2.16038	0.442646	-1.17577	3.46373e-16	4.9252e-15
Q567U6	CCDC93	Coiled-coil domain-containing protein 93	305	S	0.778587	0.353485	2.2026	1.13921	3.54908e-16	5.02244e-15
Q96T37	RBM15	RNA-binding protein 15	700	S	0.68525	0.434943	1.57549	0.655803	3.54908e-16	5.02244e-15
P04075	ALDOA	Fructose-bisphosphate aldolase A	36	S	3.06389	5.56643	0.550423	-0.861388	3.54908e-16	5.02244e-15
P35611	ADD1	Alpha-adducin	586	S	1.99288	4.68917	0.424996	-1.23448	3.54908e-16	5.02244e-15
P21333	FLNA	Filamin-A	310	S	1.62159	3.96009	0.409484	-1.28812	3.54908e-16	5.02244e-15
Q8IYH5	ZZZ3	ZZ-type zinc finger-containing protein 3	135	S	1.22465	0.587587	2.0842	1.05949	3.63651e-16	5.13797e-15
A6NKT7	RGPD3	RanBP2-like and GRIP domain-containing protein 3	797	S	0.47624	0.242754	1.96182	0.972191	3.63651e-16	5.13797e-15
P46821	MAP1B	Microtubule-associated protein 1B	1378	S	0.493701	0.749918	0.65834	-0.603095	3.72605e-16	5.26031e-15
P36021	SLC16A2	Monocarboxylate transporter 8	80	T	1.19242	2.16414	0.55099	-0.859901	3.81777e-16	5.38124e-15
P26358	DNMT1	DNA (cytosine-5)-methyltransferase 1	143	S	0.266404	0.183224	1.45398	0.54001	3.91172e-16	5.50492e-15
O60784	TOM1	Target of Myb protein 1	462	S	1.60589	2.88189	0.557235	-0.843642	3.91172e-16	5.50492e-15
Q9Y3Z3	SAMHD1	Deoxynucleoside triphosphate triphosphohydrolase SAMHD1	33	S	2.49958	1.38686	1.80233	0.849866	4.00794e-16	5.61808e-15
Q5JSH3	WDR44	WD repeat-containing protein 44	574	S	3.07838	1.89854	1.62145	0.697284	4.00794e-16	5.61808e-15
Q12888	TP53BP1	TP53-binding protein 1	1094	S	1.08284	0.74032	1.46266	0.548598	4.00794e-16	5.61808e-15
P62491	RAB11A	Ras-related protein Rab-11A	190	S	1.05607	1.67119	0.63193	-0.662163	4.00794e-16	5.61808e-15
P52701	MSH6	DNA mismatch repair protein Msh6	261	S	1.3139	0.624788	2.10295	1.07242	4.10649e-16	5.74715e-15
Q9HBL0	TNS1	Tensin-1	783	S	1.43862	2.12803	0.676035	-0.56483	4.10649e-16	5.74715e-15
Q5T200	ZC3H13	Zinc finger CCCH domain-containing protein 13	848	S	1.06673	0.560437	1.90339	0.928572	4.20744e-16	5.87453e-15
Q12888	TP53BP1	TP53-binding protein 1	1067	S	1.5451	0.907833	1.70196	0.7672	4.20744e-16	5.87453e-15
Q14680	MELK	Maternal embryonic leucine zipper kinase	505	S	0.582606	0.389414	1.49611	0.581218	4.20744e-16	5.87453e-15
Q96GM8	TOE1	Target of EGR1 protein 1	5	S	0.837593	0.580059	1.44398	0.53005	4.31082e-16	6.00002e-15
Q02040	AKAP17A	A-kinase anchor protein 17A	537	S	1.08734	0.764495	1.4223	0.508222	4.31082e-16	6.00002e-15
Q63HR2	TNS2	Tensin-2	835	S	1.26557	2.00258	0.63197	-0.662071	4.31082e-16	6.00002e-15
Q9BZH6	WDR11	WD repeat-containing protein 11	219	T	1.51097	3.17713	0.475576	-1.07225	4.31082e-16	6.00002e-15
Q9UMS6	SYNPO2	Synaptopodin-2	226	S	2.08499	4.91648	0.424081	-1.23759	4.41671e-16	6.14258e-15
Q9UIF9	BAZ2A	Bromodomain adjacent to zinc finger domain protein 2A	1783	S	0.587212	0.305	1.92529	0.945073	4.52516e-16	6.26398e-15
Q3KQU3	MAP7D1	MAP7 domain-containing protein 1	313	S	1.8087	1.01368	1.78428	0.835346	4.52516e-16	6.26398e-15
Q9NXC5	MIOS	GATOR complex protein MIOS	766	S	1.30091	0.871298	1.49307	0.578277	4.52516e-16	6.26398e-15
O14686	KMT2D	Histone-lysine N-methyltransferase 2D	1671	S	1.86099	1.26127	1.47548	0.561188	4.52516e-16	6.26398e-15
P08670	VIM	Vimentin	430	S	0.737777	1.81546	0.406386	-1.29908	4.52516e-16	6.26398e-15
Q2M1K9	ZNF423	Zinc finger protein 423	1016	S	0.817265	3.21174	0.254462	-1.97448	4.52516e-16	6.26398e-15
Q9BYB0	SHANK3	SH3 and multiple ankyrin repeat domains protein 3	375	S	1.56799	5.13386	0.305422	-1.71113	4.63624e-16	6.40775e-15
P35749	MYH11	Myosin-11	1367	S	2.32184	13.3981	0.173296	-2.52869	4.63624e-16	6.40775e-15
P40222	TXLNA	Alpha-taxilin	515	S	1.4901	0.907446	1.64208	0.715525	4.75e-16	6.53446e-15
O75362	ZNF217	Zinc finger protein 217	441	S	0.735423	0.490222	1.50018	0.58514	4.75e-16	6.53446e-15
Q9P1Y6	PHRF1	PHD and RING finger domain-containing protein 1	915	S	1.65982	1.16751	1.42168	0.507596	4.75e-16	6.53446e-15
O95671	ASMTL	Probable bifunctional dTTP/UTP pyrophosphatase/methyltransferase protein	239	S	0.884873	1.28244	0.68999	-0.535353	4.75e-16	6.53446e-15
P63267	ACTG2	Actin, gamma-enteric smooth muscle	204	T	0.846736	3.06999	0.275811	-1.85825	4.75e-16	6.53446e-15
P49736	MCM2	DNA replication licensing factor MCM2	27	S	0.7878	0.547901	1.43785	0.523913	4.86651e-16	6.67922e-15
P17252	PRKCA	Protein kinase C alpha type	319	S	0.62852	1.37678	0.456515	-1.13127	4.86651e-16	6.67922e-15
P08670	VIM	Vimentin	339	S	0.939588	2.14252	0.438543	-1.18921	4.98583e-16	6.83771e-15
P35749	MYH11	Myosin-11	1121	S	1.2316	2.27734	0.540806	-0.886817	5.10804e-16	6.99991e-15
P46821	MAP1B	Microtubule-associated protein 1B	1898	T	0.258231	0.415455	0.621562	-0.68603	5.2332e-16	7.15486e-15
O75628	REM1	GTP-binding protein REM 1	291	S	0.914068	1.57916	0.578831	-0.788785	5.2332e-16	7.15486e-15
P51636	CAV2	Caveolin-2	20	S	0.806166	2.34962	0.343105	-1.54328	5.2332e-16	7.15486e-15
P35555	FBN1	Fibrillin-1	2702	S	1.80387	4.18352	0.431184	-1.21362	5.36138e-16	7.32447e-15
Q9HB58	SP110	Sp110 nuclear body protein	244	S	1.77436	1.19534	1.4844	0.569884	5.49265e-16	7.49228e-15
O14647	CHD2	Chromodomain-helicase-DNA-binding protein 2	1560	S	2.41174	6.81321	0.35398	-1.49826	5.49265e-16	7.49228e-15
P50502	ST13	Hsc70-interacting protein	75	S	1.1264	1.65115	0.682193	-0.551749	5.62709e-16	7.65801e-15
Q8IZP2	ST13P4	Putative protein FAM10A4	71	S	1.1264	1.65115	0.682193	-0.551749	5.62709e-16	7.65801e-15
Q15172	PPP2R5A	Serine/threonine-protein phosphatase 2A 56 kDa regulatory subunit alpha isoform	41	S	0.711742	1.32931	0.535422	-0.901251	5.62709e-16	7.65801e-15
Q9BW85	YJU2	Splicing factor YJU2	179	S	2.22879	1.16841	1.90754	0.931717	5.76477e-16	7.83338e-15
Q9UBI6	GNG12	Guanine nucleotide-binding protein G(I)/G(S)/G(O) subunit gamma-12	7	S	1.4388	2.94512	0.488538	-1.03346	5.76477e-16	7.83338e-15
Q92538	GBF1	Golgi-specific brefeldin A-resistance guanine nucleotide exchange factor 1	1773	S	1.08332	1.70187	0.636546	-0.651663	5.90576e-16	8.00049e-15
O60861	GAS7	Growth arrest-specific protein 7	376	S	1.18404	2.2911	0.516799	-0.952326	5.90576e-16	8.00049e-15
Q5UIP0	RIF1	Telomere-associated protein RIF1	402	S	1.35679	0.828154	1.63833	0.712226	6.05016e-16	8.17117e-15
O94885	SASH1	SAM and SH3 domain-containing protein 1	837	S	1.6431	2.57568	0.637929	-0.648532	6.05016e-16	8.17117e-15
Q8TD19	NEK9	Serine/threonine-protein kinase Nek9	944	S	1.38192	2.86554	0.482254	-1.05213	6.05016e-16	8.17117e-15
P98175	RBM10	RNA-binding protein 10	723	S	0.883822	0.559775	1.57889	0.658909	6.19803e-16	8.36452e-15
Q14966	ZNF638	Zinc finger protein 638	1100	S	1.50124	0.902231	1.66392	0.734588	6.34946e-16	8.51068e-15
P18887	XRCC1	DNA repair protein XRCC1	447	S	1.12555	0.785889	1.4322	0.518236	6.34946e-16	8.51068e-15
[truncated: 3,342 more rows]

## Sheet: Table S4D
Table S4D. The list of 2,424 DEGs.
[truncated: 2,425 more rows]

## Sheet: Table S4E
Table S4E. The list of 2073 omics DICs.
[truncated: 2,074 more rows]

[truncated: 1 more sheets: Table S4F]
