# Supplementary material for: Large language models completely understand molecular characteristics of squamous cervical cancer
Source: Research Square preprint supplement (doi:10.21203/rs.3.rs-2855719/v1), 2023-05-30
Supplement: Supplementary file 4 [file 799af78f4e460ca00e2ad940.xlsx]

## Sheet: Table S6
Table S6. The siRNAs for candidate protein biomarkers and candidate PKs, as well as 14 kinase inhibitors with corresponding doses for 8 PKs.
Sheet	Description
Table S6A	The list of siRNAs for protein biomarkers.
Table S6B	The list of siRNAs for candidate PKs.
Table S6C	The 14 kinase inhibitors for 8 PKs.

## Sheet: Table S6A
Table S6A. The list of siRNAs for protein biomarkers.
Species	Gene name	Serial number	siRNA ID
Human	ITGB6	#1	SASI_Hs01_00120413
Human	ITGB6	#2	SASI_Hs02_00303437
Human	KRT222	#1	SASI_Hs02_00365974
Human	KRT222	#2	SASI_Hs01_00153306
Human	GINS3	#1	SASI_Hs02_00328307
Human	GINS3	#2	SASI_Hs02_00328317
Human	EPCAM	#1	SASI_Hs01_00213583
Human	EPCAM	#2	SASI_Hs02_00333689
Human	DHCR24	#1	SASI_Hs01_00054135
Human	DHCR24	#2	SASI_Hs01_00054136
Human	SERPINB5	#1	SASI_Hs02_00334167
Human	SERPINB5	#2	SASI_Hs01_00153084
Human	ABRACL	#1	SASI_Hs02_00354894
Human	ABRACL	#2	SASI_Hs01_00268274
Human	GBP1	#1	SASI_Hs01_00045489
Human	GBP1	#2	SASI_Hs01_00045490
Human	TAPBP	#1	SASI_Hs01_00118378
Human	TAPBP	#2	SASI_Hs01_00028828
Human	STAT1	#1	SASI_Hs02_00343387
Human	STAT1	#2	SASI_Hs02_00364253
Human	MCM6	#1	SASI_Hs01_00215127
Human	MCM6	#2	SASI_Hs01_00215129
Human	MCM2	#1	SASI_Hs01_00013911
Human	MCM2	#2	SASI_Hs01_00013912
Human	GALNT3	#1	SASI_Hs01_00175326
Human	GALNT3	#2	SASI_Hs02_00337704
Human	HIST1H2BL	#1	SASI_Hs01_00107040
Human	HIST1H2BL	#2	SASI_Hs01_00107041
Human	MCM3	#1	SASI_Hs01_00230231
Human	MCM3	#2	SASI_Hs01_00195876
Human	SLC16A3	#1	SASI_Hs02_00309658
Human	SLC16A3	#2	SASI_Hs02_00309668
Human	BRI3BP	#1	SASI_Hs01_00033099
Human	BRI3BP	#2	SASI_Hs01_00033100
Human	MCM5	#1	SASI_Hs01_00075532
Human	MCM5	#2	SASI_Hs01_00075533
Human	OCIAD2	#1	SASI_Hs01_00161225
Human	OCIAD2	#2	SASI_Hs01_00140278
Human	DTX3L	#1	SASI_Hs01_00027837
Human	DTX3L	#2	SASI_Hs01_00027838
Human	DSG2	#1	SASI_Hs02_00332853
Human	DSG2	#2	SASI_Hs01_00098887
Human	DNAJB11	#1	SASI_Hs01_00050785
Human	DNAJB11	#2	SASI_Hs01_00050786
Human	PCNA	#1	SASI_Hs01_00174440
Human	PCNA	#2	SASI_Hs01_00214948
Human	SLC1A5	#1	SASI_Hs01_00162267
Human	SLC1A5	#2	SASI_Hs01_00162268
Human	TMEM164	#1	SASI_Hs01_00043859
Human	TMEM164	#2	SASI_Hs01_00043861
Human	PARP9	#1	SASI_Hs01_00089429
Human	PARP9	#2	SASI_Hs01_00089430
Human	TAP2	#1	SASI_Hs01_00151065
Human	TAP2	#2	SASI_Hs01_00063213
Human	TNC	#1	SASI_Hs01_00029548
Human	TNC	#2	SASI_Hs01_00029549
Human	RBM8A	#1	SASI_Hs01_00093088
Human	RBM8A	#2	SASI_Hs01_00093096
Human	EXOSC1	#1	SASI_Hs01_00022981
Human	EXOSC1	#2	SASI_Hs01_00183400
Human	HIST1H2BK	#1	SASI_Hs01_00053628
Human	HIST1H2BK	#2	SASI_Hs01_00053629
Human	DCUN1D1	#1	SASI_Hs01_00237580
Human	DCUN1D1	#2	SASI_Hs01_00237582

## Sheet: Table S6B
Table S6B. The list of siRNAs for candidate PKs.
Species	Gene	Serial number	siRNA ID
Human	CDK14	#1	SASI_Hs01_00050762
Human	CDK14	#2	SASI_Hs01_00050764
Human	CDK14	#3	SASI_Hs01_00050766
Human	CDK6	#1	SASI_Hs01_00048790
Human	CDK6	#2	SASI_Hs01_00048791
Human	CDK6	#3	SASI_Hs01_00048792
Human	ICK	#1	SASI_WI_00000055
Human	ICK	#2	SASI_WI_00000056
Human	ICK	#3	SASI_WI_00000057
Human	PLK2	#1	SASI_Hs01_00179875
Human	PLK2	#2	SASI_Hs01_00179877
Human	PLK2	#3	SASI_Hs01_00179878
Human	CDK2	#1	SASI_Hs01_00060175
Human	CDK2	#2	SASI_Hs01_00060174
Human	CDK2	#3	SASI_Hs01_00023683
Human	CDK16	#1	SASI_Hs01_00197967
Human	CDK16	#2	SASI_Hs01_00197968
Human	CDK16	#3	SASI_Hs01_00197969
Human	CDK17	#1	SASI_WI_00000031
Human	CDK17	#2	SASI_WI_00000032
Human	CDK17	#3	SASI_Hs01_00154221
Human	CDK4	#1	SASI_Hs01_00122489
Human	CDK4	#2	SASI_Hs01_00122488
Human	CDK4	#3	SASI_Hs01_00122490
Human	PLK1	#1	SASI_Hs01_00194343
Human	PLK1	#2	SASI_Hs01_00194345
Human	PLK1	#3	SASI_Hs01_00194346
Human	MAK	#1	SASI_Hs01_00113718
Human	MAK	#2	SASI_Hs01_00113719
Human	MAK	#3	SASI_Hs01_00113720
Human	CLK4	#1	SASI_Hs02_00353658
Human	CLK4	#2	SASI_Hs01_00012421
Human	CLK4	#3	SASI_Hs01_00012422
Human	CLK1	#1	SASI_Hs01_00011838
Human	CLK1	#2	SASI_Hs01_00011839
Human	CLK1	#3	SASI_Hs01_00011840
Human	CDKL4	#1	SASI_Hs01_00187017
Human	CDKL4	#2	SASI_Hs01_00187018
Human	CDKL4	#3	SASI_Hs01_00187019
Human	SRPK3	#1	SASI_Hs01_00184830
Human	SRPK3	#2	SASI_Hs01_00184831
Human	SRPK3	#3	SASI_Hs01_00184832
Human	CDKL1	#1	SASI_Hs02_00337092
Human	CDKL1	#2	SASI_Hs01_00236012
Human	CDKL1	#3	SASI_Hs01_00236013
Human	CLK2	#1	SASI_Hs01_0022021
Human	CLK2	#2	SASI_Hs02_00336705
Human	CLK2	#3	SASI_Hs01_00011858
Human	CLK3	#1	SASI_Hs01_00075104
Human	CLK3	#2	SASI_Hs02_00336698
Human	CLK3	#3	SASI_Hs01_00149785
Human	SRPK2	#1	SASI_Hs01_00057789
Human	SRPK2	#2	SASI_Hs01_00205431
Human	SRPK2	#3	SASI_Hs01_00205432
Human	MTOR	#1	SASI_Hs01_00203145
Human	MTOR	#2	SASI_Hs01_00203144
Human	MTOR	#3	SASI_Hs01_00203146
Human	CHEK1	#1	SASI_Hs01_00027316
Human	CHEK1	#2	SASI_Hs01_00027317
Human	CHEK1	#3	SASI_Hs02_00326314
Human	CDKL5	#1	SASI_Hs01_00037689
Human	CDKL5	#2	SASI_Hs01_00037694
Human	CDKL5	#3	SASI_Hs01_00246971
Human	CDKL2	#1	SASI_Hs01_00129338
Human	CDKL2	#2	SASI_Hs02_00336609
Human	CDKL2	#3	SASI_Hs01_00129339
Human	DYRK1A	#1	SASI_Hs01_00123259
Human	DYRK1A	#2	SASI_Hs01_00048110
Human	DYRK1A	#3	SASI_Hs01_00157429
Human	DYRK1B	#1	SASI_Hs01_00215157
Human	DYRK1B	#2	SASI_Hs01_00181381
Human	DYRK1B	#3	SASI_Hs01_00234736
Human	CHEK2	#1	SASI_Hs01_00066347
Human	CHEK2	#2	SASI_Hs01_00012101
Human	CHEK2	#3	SASI_Hs01_00013930
Human	DYRK3	#1	SASI_Hs01_00165903
Human	DYRK3	#2	SASI_Hs01_00165904
Human	DYRK3	#3	SASI_Hs01_00144739
Human	HIPK2	#1	SASI_Hs01_00042453
Human	HIPK2	#2	SASI_Hs01_00042452
Human	HIPK2	#3	SASI_Hs02_00325681
Human	HIPK1	#1	SASI_Hs01_00245412
Human	HIPK1	#2	SASI_Hs01_00147452
Human	HIPK1	#3	SASI_Hs01_00036426
Human	HIPK4	#1	SASI_Hs01_00052908
Human	HIPK4	#2	SASI_Hs01_00052909
Human	HIPK4	#3	SASI_Hs01_00052910
Human	CDK13	#1	SASI_Hs01_00186727
Human	CDK13	#2	SASI_Hs01_00186728
Human	CDK13	#3	SASI_Hs01_00122908
Human	CDK15	#1	SASI_Hs01_00021704
Human	CDK15	#2	SASI_Hs01_00021705
Human	CDK15	#3	SASI_Hs01_00021706
Human	CDK12	#1	SASI_Hs02_00346951
Human	CDK12	#2	SASI_Hs02_00346952
Human	CDK12	#3	SASI_Hs02_00349578
Human	CDK7	#1	SASI_Hs01_00214780
Human	CDK7	#2	SASI_Hs01_00214782
Human	CDK7	#3	SASI_Hs01_00214781
Human	CDK8	#1	SASI_WI_00000018
Human	CDK8	#2	SASI_WI_00000017
Human	CDK8	#3	SASI_WI_00000016
Human	CDK9	#1	SASI_Hs01_00112403
Human	CDK9	#2	SASI_Hs01_00112404
Human	CDK9	#3	SASI_Hs01_00112405
Human	CDK20	#1	SASI_Hs02_00308677
Human	CDK20	#2	SASI_Hs02_00343661
Human	CDK20	#3	SASI_Hs02_00369665
Human	CDK18	#1	SASI_Hs02_00334101
Human	CDK18	#2	SASI_Hs02_00374212
Human	CDK18	#3	SASI_Hs02_00374213

## Sheet: Table S6C
Table S6C. The 14 kinase inhibitors for 8 PKs.
PK	Drug/Inhibitor	Cat. No.	Source
CDK12	CDK12-IN-3	HY-112261	MedChemExpress
CDK2	SNS-032	S1145	Selleck Chemicals
CDK2	Ro-3306	S7747	Selleck Chemicals
CDK4	Lerociclib	S8568	Selleck Chemicals
CDK4	Palbociclib	S4482	Selleck Chemicals
CDK9	AZD4573	S8981	Selleck Chemicals
CDK9	NVP-2	S8981	Selleck Chemicals
DYRK1B	INDY	HY-108476	MedChemExpress
DYRK1B	AZ191	S7338	Selleck Chemicals
DYRK3	GSK-626616	HY-105309	MedChemExpress
MTOR	KU-0063794	S1226	Selleck Chemicals
MTOR	Rapamycin	S1039	Selleck Chemicals
PLK1	GSK461364	S2193	Selleck Chemicals
PLK1	BI6727	S2235	Selleck Chemicals
