# Supplementary material for: Large language models completely understand molecular characteristics of squamous cervical cancer
Source: Research Square preprint supplement (doi:10.21203/rs.3.rs-2855719/v1), 2023-05-30
Supplement: Supplementary file 5 [file b31b29eee643a742ea842b53.xlsx]

## Sheet: Summary
Table S1 The total ChatGPT questioning and answering pairs of interpretation, reasoning and new insights.
Sheet	Description
Table S1A	First question in interpretation module of querying DEPs, DPPs, DEGs, FMGs and single-cell markers.
Table S1B	Second question in interpretation module of querying DEPs, DPPs, DEGs, FMGs and single-cell markers.
Table S1C	Third question in interpretation module of querying DEPs, DPPs, DEGs, FMGs and single-cell markers.
Table S1D	First question in reasoning module of querying image characteristics.
Table S1E	Second question in interpretation module of querying image characteristic changing.
Table S1F	Third question in interpretation module of querying molecular alteration with imaging characteristic changing.
Table S1G	First question in new insight module of querying experimental verified moleclues.
Table S1H	Second question in new insight module of querying experimental results of molecules.
Table S1I	Third question in new insight module of querying reasoning confidence of molecule involvement in cervical cancer.
Table S1J	Questions within signal webs.

## Sheet: Table S1A
Table S1A. First question in interpretation module of querying DEPs, DPPs, DEGs, FMGs and single-cell markers.
Gene	Question	Answer	Source
RRAS	Can you tell me the function of the protein "RRAS" (Ras-related protein R-Ras) of human?	RRAS is a member of the Ras family of small GTPases that regulates various cellular processes such as cell growth, differentiation, adhesion, and migration. RRAS acts as a switch that turns on or off signaling pathways, such as the MAPK/ERK or PI3K/Akt pathways, by binding and activating downstream effectors. RRAS has been shown to play important roles in angiogenesis, cancer progression, and neu…	DEP
GPX3	Can you tell me the function of the protein "GPX3" (Glutathione peroxidase 3) of human?	The function of the protein GPX3 (Glutathione peroxidase 3) in humans is to catalyze the reduction of hydrogen peroxide and organic hydroperoxides in biological tissues using glutathione as a cofactor. This antioxidant enzyme protects the body against the damaging effects of reactive oxygen species (ROS) and thereby promotes healthy cellular function. GPX3 has also been implicated in a variety of…	DEP
GGT5	Can you tell me the function of the protein "GGT5" (Glutathione hydrolase 5 proenzyme) of human?	The protein GGT5 (Glutathione hydrolase 5 proenzyme) of human is an enzyme that helps to break down glutathione, an antioxidant found in cells, into its components of amino acids. It is primarily expressed in the kidneys and liver and may play a role in processing and eliminating toxic substances in the body. The exact function of GGT5 is not fully understood, but it is thought to be involved in …	DEP
PLVAP	Can you tell me the function of the protein "PLVAP" (Plasmalemma vesicle-associated protein) of human?	The PLVAP protein is involved in forming a structure called the diaphragm in endothelial cells. The diaphragm is important in controlling the passage of molecules between the blood vessel and the surrounding tissues. The protein is also involved in inflammation and immune response. It has been found to be upregulated in various pathological conditions such as cancer and inflammation, suggesting a…	DEP
TNS2	Can you tell me the function of the protein "TNS2" (Tensin-2) of human?	The protein TNS2 (Tensin-2) in humans plays a role in cell adhesion and migration, regulating the assembly and disassembly of focal adhesions. It is also involved in the regulation of cell proliferation and apoptosis. TNS2 acts as a tumor suppressor and has been implicated in various cancers, including breast and lung cancer.	DEP
COL15A1	Can you tell me the function of the protein "COL15A1" (Collagen alpha-1(XV) chain) of human?	The protein COL15A1 is a component of type XV collagen, which is a fibril-associated collagen and a major component of extracellular matrix (ECM) in various tissues including skin, tendon, cartilage, and blood vessels. It plays a role in the regulation of cell adhesion, migration, and signaling, as well as in maintaining tissue integrity and stability. Mutations in the COL15A1 gene have been asso…	DEP
CRTAC1	Can you tell me the function of the protein "CRTAC1" (Cartilage acidic protein 1) of human?	The function of the protein CRTAC1 (Cartilage acidic protein 1) of human includes its role in the development and maintenance of cartilage, including the regulation of chondrocyte differentiation, proliferation, and apoptosis. It also plays a role in the repair and regeneration of damaged cartilage, influencing extracellular matrix synthesis and tissue remodeling. Additionally, CRTAC1 has been im…	DEP
DAG1	Can you tell me the function of the protein "DAG1" (Dystroglycan) of human?	Dystroglycan (DAG1) is a protein that plays a critical role in maintaining the stability of muscle fibers, especially in skeletal and cardiac muscles, by linking the extracellular matrix to the cytoskeleton. It is also important for the normal development of the brain, eyes, and other organs. DAG1 has been found to act as a receptor for various extracellular matrix proteins and to participate in …	DEP
SUSD2	Can you tell me the function of the protein "SUSD2" (Sushi domain-containing protein 2) of human?	SUSD2 is a type I transmembrane protein found in various human tissues, including the brain, heart, kidney, and lung. It contains several sushi domains, which are involved in protein-protein interactions.The function of SUSD2 is not fully understood, but studies suggest that it may have roles in various cellular processes, including cell adhesion, migration, and survival. It has also been implica…	DEP
JAM3	Can you tell me the function of the protein "JAM3" (Junctional adhesion molecule C) of human?	JAM3 (Junctional adhesion molecule C) is a transmembrane protein involved in cell-cell adhesion and the regulation of leukocyte trafficking. JAM3 is expressed in endothelial cells and plays a crucial role in the organization of endothelial cell junctions, which are essential for maintaining the integrity of the blood vessel barrier. JAM3 has also been shown to play a role in leukocyte transmigrat…	DEP
LRG1	Can you tell me the function of the protein "LRG1" (Leucine-rich alpha-2-glycoprotein) of human?	LRG1 is involved in various biological processes such as immune response, cell differentiation, and cancer development. It has been shown to bind to extracellular matrix components and regulate angiogenesis, inflammation, and wound healing. LRG1 has also been associated with cardiovascular diseases and is considered a potential biomarker for the early diagnosis of various cancers.	DEP
FERMT2	Can you tell me the function of the protein "FERMT2" (Fermitin family homolog 2) of human?	FERMT2 is a protein that plays a crucial role in cell adhesion and migration. Specifically, it is involved in the formation of focal adhesions, which are important structures that attach cells to their extracellular matrix and allow them to move and respond to external stimuli. FERMT2 also interacts with other proteins involved in cell signaling pathways and has been implicated in various cellula…	DEP
MASP1	Can you tell me the function of the protein "MASP1" (Mannan-binding lectin serine protease 1) of human?	MASP1 is a serine protease that plays a crucial role in the complement system of the immune system. Specifically, MASP1 is involved in the activation of the lectin pathway of the complement system. It cleaves and activates downstream proteins in the pathway, ultimately leading to the destruction of foreign invaders such as bacteria and viruses. Dysfunction or deficiency of MASP1 has been associat…	DEP
KLKB1	Can you tell me the function of the protein "KLKB1" (Plasma kallikrein) of human?	The protein KLKB1 (Plasma kallikrein) functions as a serine protease involved in the activation of the kinin-kallikrein system. It cleaves high molecular weight kininogen to release bradykinin, a potent vasodilator and mediator of inflammation. KLKB1 also cleaves coagulation factor XII leading to its activation into active factor XIIa, which initiates the intrinsic pathway of coagulation. Additio…	DEP
HSPA12B	Can you tell me the function of the protein "HSPA12B" (Heat shock 70 kDa protein 12B) of human?	The exact function of HSPA12B is not fully understood, but it is believed to play a role in response to stress and inflammation in cells. Some studies have suggested that it may be involved in protein folding and preventing protein aggregation, as well as regulating cellular metabolism and protecting against oxidative stress. It has also been implicated in various diseases, including cancer, neur…	DEP
VASN	Can you tell me the function of the protein "VASN" (Vasorin) of human?	VASN, also known as vasorin, is a type I transmembrane protein that is abundantly expressed in the cardiovascular system. Its function is not yet fully understood, but research suggests that it may play a role in cardiovascular development, angiogenesis, and the regulation of blood pressure. VASN is also believed to act as a tumor suppressor in certain types of cancer, suggesting that it may have…	DEP
DDAH2	Can you tell me the function of the protein "DDAH2" (N(G),N(G)-dimethylarginine dimethylaminohydrolase 2) of human?	The protein DDAH2, also known as N(G),N(G)-dimethylarginine dimethylaminohydrolase 2, is an enzyme that plays a critical role in the metabolism of the amino acid arginine. Specifically, DDAH2 catalyzes the breakdown of asymmetric dimethylarginine (ADMA), preventing its accumulation in the body. ADMA is an inhibitor of nitric oxide synthase (NOS), an enzyme that produces nitric oxide, a molecule w…	DEP
TNS1	Can you tell me the function of the protein "TNS1" (Tensin-1) of human?	Tensin-1 (TNS1) is a cytoskeletal scaffold protein. It plays a vital role in cell adhesion, migration, and proliferation processes. TNS1 mediates cell attachment to the extracellular matrix by interacting with different proteins that link the cytoskeleton to the membrane. It also contributes to the regulation of the actin cytoskeleton by controlling the assembly and organization of actin filament…	DEP
FBLN1	Can you tell me the function of the protein "FBLN1" (Fibulin-1) of human?	The protein FBLN1 (Fibulin-1) of human plays a role in the extracellular matrix (ECM) and is involved in various biological processes, including cell adhesion, migration, and differentiation. It also binds to other ECM proteins, such as elastin, collagen, and proteoglycans, and helps to maintain the structural integrity of tissues. FBLN1 has been implicated in the development of several diseases,…	DEP
CFD	Can you tell me the function of the protein "CFD" (Complement factor D) of human?	The protein CFD (Complement Factor D) is a serine protease that plays a key role in the alternative pathway of the complement system, which is part of the immune system. CFD cleaves factor B in the presence of properdin, resulting in the formation of the C3 convertase, which ultimately leads to opsonization and/or lysis of target cells. Thus, CFD is important for the host defense against invading…	DEP
IGFALS	Can you tell me the function of the protein "IGFALS" (Insulin-like growth factor-binding protein complex acid labile subunit) of human?	The IGFALS protein serves as the acid-labile subunit of the insulin-like growth factor-binding protein complex. This protein is responsible for binding to insulin-like growth factors (IGFs), which regulate cell growth and metabolism. By binding to IGFs, the IGFALS protein helps to increase the half-life and stability of IGFs in the bloodstream, thereby enhancing their ability to promote cell grow…	DEP
EFEMP2	Can you tell me the function of the protein "EFEMP2" (EGF-containing fibulin-like extracellular matrix protein 2) of human?	The protein EFEMP2 (EGF-containing fibulin-like extracellular matrix protein 2) of human is involved in cell adhesion, signaling, and extracellular matrix organization. It plays a role in cell migration, tumor invasion, and angiogenesis. EFEMP2 also interacts with other proteins in the extracellular matrix, such as fibulins and integrins. Dysfunction or abnormal expression of EFEMP2 has been impl…	DEP
TGFB1I1	Can you tell me the function of the protein "TGFB1I1" (Transforming growth factor beta-1-induced transcript 1 protein) of human?	TGFB1I1 (Transforming growth factor beta-1-induced transcript 1 protein) is involved in multiple biological processes, including regulation of cell differentiation, proliferation, and migration. It is also involved in regulation of the extracellular matrix and has been implicated in cancer development and progression. TGFB1I1 is a component of the transforming growth factor beta (TGF-β) signaling…	DEP
C5	Can you tell me the function of the protein "C5" (Complement C5) of human?	The protein Complement C5 is a part of the complement system, which is a group of proteins that plays an important role in the immune response. C5 acts to stimulate inflammation and helps in the destruction of invading pathogens, such as bacteria, viruses, and fungi. It does so by contributing to the formation of a membrane attack complex which damages the cell membrane of the pathogen, thereby l…	DEP
SERPIND1	Can you tell me the function of the protein "SERPIND1" (Heparin cofactor 2) of human?	The protein SERPIND1, also known as Heparin cofactor 2, is a serine protease inhibitor that plays a critical role in regulating blood coagulation. It functions as a cofactor for heparin and helps to inhibit factors Xa and thrombin, which are key enzymes involved in the coagulation cascade. This protein is primarily produced in the liver and circulates in the bloodstream. SERPIND1 deficiency or dy…	DEP
AFM	Can you tell me the function of the protein "AFM" (Afamin) of human?	Afamin (also known as alpha-1-microglobulin/bikunin precursor) is a protein found in human plasma and belongs to the albumin superfamily. Its function is not yet completely understood, but it has been suggested to have multiple roles, including antioxidant and anti-inflammatory properties. Additionally, it has been shown to bind to vitamin E, retinol, and other hydrophobic molecules, suggesting a…	DEP
C8B	Can you tell me the function of the protein "C8B" (Complement component C8 beta chain) of human?	The protein C8B is a part of the complement system, which is a group of proteins that help the immune system fight off infections. Specifically, C8B is the beta chain of the complement component C8, which is involved in the formation of membrane attack complex (MAC) that can lyse bacterial cell membranes. C8B forms a complex with other proteins called C8 alpha and C8 gamma chains, and together th…	DEP
ANG	Can you tell me the function of the protein "ANG" (Angiogenin) of human?	As an AI language model, I cannot provide an opinion on this matter. However, I can provide the factual information that Angiogenin (ANG) is a protein present in humans that has been found to promote the formation of new blood vessels, help in the growth and survival of neurons, and play a role in the immune response. ANG has also been implicated in various diseases, including cancer and neurolog…	DEP
VWF	Can you tell me the function of the protein "VWF" (von Willebrand factor) of human?	The main function of von Willebrand Factor (VWF) in humans is to facilitate the adhesion of platelets to damaged blood vessel walls, which is a critical step in the formation of blood clots (hemostasis). VWF also serves as a carrier protein for clotting factor VIII, which is essential for the formation of blood clots. Additionally, VWF plays a role in angiogenesis and wound healing.	DEP
CFI	Can you tell me the function of the protein "CFI" (Complement factor I) of human?	Yes, as an AI language model, I can tell the function of the protein "CFI" or Complement Factor I of human that It is a serine protease that plays a role in the regulation of the complement system, which is a group of proteins that work together to defend against infections. CFI helps to regulate the complement system by breaking down complement proteins to prevent excessive activation and damage…	DEP
SERPINA7	Can you tell me the function of the protein "SERPINA7" (Thyroxine-binding globulin) of human?	The function of the protein SERPINA7, also known as thyroxine-binding globulin, is to transport the thyroid hormone thyroxine (T4) in the blood. It binds to T4 and carries it to various organs and tissues that require it for proper metabolism and growth. It also plays a role in regulating the levels of T4 in the body, as it can release the hormone when levels are low or bind more T4 when levels a…	DEP
FMOD	Can you tell me the function of the protein "FMOD" (Fibromodulin) of human?	Fibromodulin (FMOD) is a protein that is primarily found in connective tissues. It acts as a regulator of collagen fibril formation and organization, contributing to the structural integrity and function of tissues such as cartilage, tendons, and skin. FMOD also has anti-inflammatory properties and is involved in wound healing and tissue repair. Mutations in the FMOD gene have been linked to vari…	DEP
C6	Can you tell me the function of the protein "C6" (Complement component C6) of human?	The function of Complement component C6 is to act as a component of the complement system that helps to destroy foreign invaders such as bacteria and viruses. C6 is involved in the formation of the membrane attack complex (MAC), which is a group of proteins that work together to create pores in the membranes of invading cells, leading to their destruction. In addition, C6 also plays a role in imm…	DEP
F12	Can you tell me the function of the protein "F12" (Coagulation factor XII) of human?	The protein "F12" (Coagulation factor XII) of human is involved in the initiation of blood coagulation, which is a complex process that leads to the formation of a blood clot to prevent excessive bleeding. Specifically, F12 activates the coagulation cascade by activating a series of enzymes, ultimately leading to the production of thrombin, which converts fibrinogen into fibrin, the main componen…	DEP
CPN2	Can you tell me the function of the protein "CPN2" (Carboxypeptidase N subunit 2) of human?	The protein CPN2, also known as carboxypeptidase N subunit 2, is involved in the processing and degradation of proteins. Specifically, it cleaves off the C-terminal amino acid residues from protein substrates, which is important in regulating the activity and function of these proteins. CPN2 is expressed in a variety of tissues and is involved in many physiological processes such as blood coagula…	DEP
IGKV1-5	Can you tell me the function of the protein "IGKV1-5" (Immunoglobulin kappa variable 1-5) of human?	The protein IGKV1-5 (Immunoglobulin kappa variable 1-5) is a type of antibody protein that is involved in the immune response of humans. It is specifically a variable region of the kappa chain of the immunoglobulin protein, which enables it to bind to specific antigens or foreign particles in the body. Once bound, the IGKV1-5 antibody can neutralize or eliminate the antigen, thereby helping the b…	DEP
PRNP	Can you tell me the function of the protein "PRNP" (Major prion protein) of human?	The major function of the PRNP (Major prion protein) protein in humans is not fully understood. However, it is known that this protein is involved in the pathogenesis of prion diseases, such as Creutzfeldt-Jakob disease (CJD). The PRNP protein conformational changes from its normal alpha-helical structure to a beta-sheet structure give rise to the formation of prion aggregates which cause neurona…	DEP
SERPINA4	Can you tell me the function of the protein "SERPINA4" (Kallistatin) of human?	The protein SERPINA4 (Kallistatin) is known to have multiple functions in the human body, including	DEP
IGHG4	Can you tell me the function of the protein "IGHG4" (Immunoglobulin heavy constant gamma 4) of human?	The protein IGHG4 is a subtype of the immunoglobulin heavy constant gamma protein that is involved in the immune system's response to foreign substances such as pathogens. The function of IGHG4 is to bind to antigens, marking them for destruction by other immune cells or neutralizing them directly. It is also involved in activating immune cells and regulating inflammation in response to infection…	DEP
SERPINF1	Can you tell me the function of the protein "SERPINF1" (Pigment epithelium-derived factor) of human?	The protein SERPINF1, also known as Pigment epithelium-derived factor (PEDF), has multiple functions in the human body. Some of the known functions are	DEP
C8G	Can you tell me the function of the protein "C8G" (Complement component C8 gamma chain) of human?	The protein C8G is a component of the complement system, specifically part of the C8 complex. The C8 complex is involved in the membrane attack pathway, which is responsible for destroying bacterial and viral membranes, as well as damaged host cells. As the gamma chain of C8, C8G is essential for the assembly and stability of the C8 complex, which plays a critical role in the immune defense again…	DEP
IGHG1	Can you tell me the function of the protein "IGHG1" (Immunoglobulin heavy constant gamma 1) of human?	The function of the protein IGHG1 is to serve as a component of immunoglobulin G (IgG), which is an important class of antibodies in the immune system. IgG antibodies circulate in the blood and help to neutralize and eliminate harmful pathogens, such as bacteria and viruses. The constant region of IgG, which is made up of the IGHG1 protein, plays a crucial role in binding to host immune cells and…	DEP
PLTP	Can you tell me the function of the protein "PLTP" (Phospholipid transfer protein) of human?	The function of PLTP (Phospholipid transfer protein) in humans is to transfer phospholipids and other lipids between lipoproteins, as well as to modulate lipoprotein metabolism and transport in plasma. It can also influence inflammation, immunity, and atherogenesis. It is involved in the regulation of the size and composition of high-density lipoprotein (HDL) particles and their ability to remove…	DEP
ANK2	Can you tell me the function of the protein "ANK2" (Ankyrin-2) of human?	The protein ANK2 (Ankyrin-2) of human is a cytoskeletal protein that plays a crucial role in linking integral membrane proteins to the underlying cytoskeleton. It is involved in the maintenance of cellular integrity and electrical signaling in many different cell types, including cardiomyocytes, neurons, and epithelial cells. Mutations in the ANK2 gene have been associated with various human dise…	DEP
PGLYRP2	Can you tell me the function of the protein "PGLYRP2" (N-acetylmuramoyl-L-alanine amidase) of human?	The function of PGLYRP2 (N-acetylmuramoyl-L-alanine amidase) protein in humans is to act as an enzyme that participates in the innate immune response to bacterial infections by breaking down the peptidoglycan layer present on the bacterial cell walls. This protein binds to the peptidoglycan layer of bacteria and cleaves the N-acetylmuramic acid and L-alanine bond, which leads to the degradation o…	DEP
SSC5D	Can you tell me the function of the protein "SSC5D" (Soluble scavenger receptor cysteine-rich domain-containing protein SSC5D) of human?	The function of the protein SSC5D in humans is not fully understood. However, it has been suggested to play a role in the regulation of immune responses and inflammation. It may also have a role in the regulation of cell growth and differentiation.	DEP
TTR	Can you tell me the function of the protein "TTR" (Transthyretin) of human?	Transthyretin (TTR) is a protein that transports thyroid hormone and retinol (vitamin A) in the blood. It is primarily produced in the liver, but can also be synthesized in other organs such as the choroid plexus in the brain. TTR is believed to play a role in the regulation of thyroid hormone levels and vitamin A metabolism. Mutations in the TTR gene have been linked to several diseases, includi…	DEP
RECK	Can you tell me the function of the protein "RECK" (Reversion-inducing cysteine-rich protein with Kazal motifs) of human?	The RECK protein is a tumor suppressor protein that plays a crucial role in controlling the growth and invasion of cancer cells. It regulates the activity of matrix metalloproteinases (MMPs), which are enzymes that break down the extracellular matrix in tissues. By inhibiting MMP activity, RECK prevents the degradation of the extracellular matrix and maintains the integrity of the tissue structur…	DEP
SERPINA1	Can you tell me the function of the protein "SERPINA1" (Alpha-1-antitrypsin) of human?	The function of SERPINA1 (Alpha-1-antitrypsin) in humans is to prevent the breakdown of tissues by inhibiting enzymes such as neutrophil elastase, which can cause tissue damage. It is primarily produced in the liver and secreted into the blood, where it acts as a protease inhibitor. It is also involved in regulating the immune response and inflammation. Mutations in the SERPINA1 gene can lead to …	DEP
SERPINA2	Can you tell me the function of the protein "SERPINA2" (Putative alpha-1-antitrypsin-related protein) of human?	SERPINA2 is a putative alpha-1-antitrypsin-related protein that is expressed in various tissues, including the liver, heart, lung, and kidney. Its function is not yet fully understood, but it is suggested to have a role in protecting tissues from proteolytic damage by inhibiting proteases such as trypsin and chymotrypsin. It may also play a role in regulating inflammation and immune responses. Mo…	DEP
HSPA12A	Can you tell me the function of the protein "HSPA12A" (Heat shock 70 kDa protein 12A) of human?	The function of HSPA12A is not yet fully understood, but it is believed to play a role in cellular stress response and protein folding. It has also been implicated in various diseases, including cancer and neurodegenerative disorders.	DEP
APOA1	Can you tell me the function of the protein "APOA1" (Apolipoprotein A-I) of human?	The protein APOA1 functions as a major component of high-density lipoprotein (HDL), which is commonly known as "good cholesterol." It plays a key role in the transportation of excess cholesterol from the peripheral cells and tissues to the liver, where it can be processed and removed from the body. Additionally, APOA1 has anti-inflammatory and antioxidant properties that may help prevent the deve…	DEP
NEGR1	Can you tell me the function of the protein "NEGR1" (Neuronal growth regulator 1) of human?	The NEGR1 protein plays a role in the regulation of neuronal growth and development, specifically in the formation and maturation of dendrites and synapses. It is also involved in the regulation of insulin signaling and glucose metabolism, as well as adipose tissue formation and function. There is also evidence suggesting a potential role in obesity and cardiovascular disease.	DEP
ITGA5	Can you tell me the function of the protein "ITGA5" (Integrin alpha-5) of human?	The protein ITGA5 (Integrin alpha-5) of human is a transmembrane receptor protein that plays an important role in cellular adhesion and signaling. Specifically, it forms a heterodimer with the beta-1 subunit to create the alpha5beta1 integrin, which interacts with various extracellular matrix proteins, such as fibronectin and laminin, to mediate cell adhesion, migration, and survival. ITGA5 also …	DEP
APOD	Can you tell me the function of the protein "APOD" (Apolipoprotein D) of human?	The function of the protein APOD (Apolipoprotein D) in humans is not fully understood. However, it is known to be involved in lipid metabolism and transport, as well as in stress response, inflammation, and neuroprotection. It is thought to play a role in maintaining the stability of neuronal membrane structures and protecting against oxidative stress. It has also been implicated in various disea…	DEP
CLEC3B	Can you tell me the function of the protein "CLEC3B" (Tetranectin) of human?	The protein CLEC3B (Tetranectin) is involved in the regulation of many biological processes, including bone metabolism, blood coagulation, and immune response. CLEC3B acts as a calcium-dependent lectin, which means it binds to specific carbohydrate structures on other molecules. It is thought to contribute to the formation of the extracellular matrix and the adhesion of cells to surfaces. Additio…	DEP
LAMB2	Can you tell me the function of the protein "LAMB2" (Laminin subunit beta-2) of human?	The protein LAMB2 (Laminin subunit beta-2) is an essential component of the basement membrane, which is a specialized layer of extracellular matrix that separates different tissues in the body. LAMB2 plays a critical role in maintaining the structural integrity of basement membranes and promoting cell adhesion and migration. Mutations in the LAMB2 gene are associated with certain genetic disorder…	DEP
TPSB2	Can you tell me the function of the protein "TPSB2" (Tryptase beta-2) of human?	The protein TPSB2, also known as Tryptase beta-2, is a member of the tryptase family of serine proteases. It is primarily expressed in mast cells and is involved in allergic reactions and inflammation. TPSB2 is thought to play a role in regulating the immune response, as well as in tissue remodeling and repair. Specifically, TPSB2 is known to cleave protease-activated receptor 2 (PAR-2), a cell s…	DEP
TPSAB1	Can you tell me the function of the protein "TPSAB1" (Tryptase alpha/beta-1) of human?	TPSAB1 (Tryptase alpha/beta-1) is a protein that belongs to the family of tryptases. It is primarily expressed in mast cells, which are involved in the immune response and inflammation. TPSAB1 functions as a protease, meaning it can cleave other proteins into smaller fragments. Its primary role is thought to be in the regulation of immune responses by cleaving or activating other proteins involve…	DEP
TPSD1	Can you tell me the function of the protein "TPSD1" (Tryptase delta) of human?	The protein TPSD1 (Tryptase delta) is a member of the tryptase family of proteases and is primarily expressed in mast cells. Its exact function is not completely understood, but studies have suggested a role in regulating mast cell function and inflammatory responses. TPSD1 has also been implicated in tissue remodeling and wound healing. Additionally, mutations in the TPSD1 gene have been associa…	DEP
ITGA7	Can you tell me the function of the protein "ITGA7" (Integrin alpha-7) of human?	The protein ITGA7 (Integrin alpha-7) is a transmembrane glycoprotein that functions as a cell adhesion receptor. It is primarily expressed in skeletal and cardiac muscle fibers, where it plays a critical role in maintenance of muscle integrity and function. ITGA7 has also been implicated in various diseases such as muscular dystrophies, heart failure, and cancer.	DEP
EHD2	Can you tell me the function of the protein "EHD2" (EH domain-containing protein 2) of human?	The EH domain-containing protein 2 (EHD2) is a protein present in humans that functions as an endosomal protein. It is involved in the regulation of the endocytic pathway, where it plays a vital role in intracellular trafficking of membrane-associated proteins. EHD2 is also implicated in the recycling of cargoes from endosomes to the plasma membrane, as well as the formation of the topologically …	DEP
AZGP1	Can you tell me the function of the protein "AZGP1" (Zinc-alpha-2-glycoprotein) of human?	AZGP1 (Zinc-alpha-2-glycoprotein) is a protein found in human serum, prostate, and other tissues. The function of AZGP1 is not entirely clear, but it is suggested to be involved in regulating lipid metabolism, insulin sensitivity, and glucose homeostasis. AZGP1 has also been implicated in cancer biology, serving as a tumor suppressor in some cancers and promoting metastasis in others. Additionall…	DEP
C8A	Can you tell me the function of the protein "C8A" (Complement component C8 alpha chain) of human?	The protein C8A is a subunit of the complement system's C8 protein, which is responsible for forming the membrane attack complex (MAC) that helps protect against pathogens. Specifically, the C8A subunit binds to the C8B and C8G subunits to create the C8 protein complex, which forms part of the MAC.	DEP
GNAO1	Can you tell me the function of the protein "GNAO1" (Guanine nucleotide-binding protein G(o) subunit alpha) of human?	GNAO1 is a protein that binds to guanine nucleotides and is involved in the regulation of various cellular processes, including neuronal signaling, neurotransmitter release, and ion channel activity. In humans, mutations in the GNAO1 gene have been associated with a rare neurological disorder called early infantile epileptic encephalopathy (EIEE17), which is characterized by seizures, development…	DEP
DMD	Can you tell me the function of the protein "DMD" (Dystrophin) of human?	The DMD gene provides instructions for making the protein dystrophin, which is essential for normal muscle function. Dystrophin helps to strengthen and protect muscle fibers, ensuring that they can withstand the force of each contraction. Mutations in the DMD gene can lead to a lack of dystrophin, causing a group of disorders collectively known as muscular dystrophy.	DEP
IGHV3-23	Can you tell me the function of the protein "IGHV3-23" (Immunoglobulin heavy variable 3-23) of human?	The function of IGHV3-23 is to encode a part of the variable region of the heavy chain of immunoglobulin M (IgM) and immunoglobulin G (IgG) antibodies in humans. This protein plays an important role in recognizing and binding to specific antigens, which trigger an immune response to protect the body from infections and other harmful substances. Furthermore, IGHV3-23 may also contribute to the div…	DEP
CFL2	Can you tell me the function of the protein "CFL2" (Cofilin-2) of human?	CFL2 (Cofilin-2) is a protein involved in the regulation of actin filament assembly and disassembly. It helps to regulate the dynamics of actin filaments, which are critical for various cellular processes including cell motility, cytokinesis, and muscle contraction. Additionally, CFL2 has been shown to play a role in neuronal function and synaptic plasticity. Dysfunction of CFL2 has been implicat…	DEP
AGT	Can you tell me the function of the protein "AGT" (Angiotensinogen) of human?	The protein AGT (Angiotensinogen) is a precursor of the vasoactive hormone angiotensin II, which plays an important role in regulating blood pressure, sodium and water balance, and cardiovascular function. AGT is synthesized and secreted principally by the liver, and is cleaved by renin released from the kidneys to form angiotensin I. Angiotensin I is further processed by angiotensin-converting e…	DEP
GC	Can you tell me the function of the protein "GC" (Vitamin D-binding protein) of human?	The main function of Vitamin D-binding protein, also known as "GC," is to bind and transport vitamin D and its metabolites in the blood. Additionally, GC plays a role in regulating the immune system and has been linked to various diseases such as cancer, diabetes, and cardiovascular diseases.	DEP
IGLL5	Can you tell me the function of the protein "IGLL5" (Immunoglobulin lambda-like polypeptide 5) of human?	As an AI language model, I do not have access to the latest research. However, based on existing literature, the function of IGLL5 (Immunoglobulin lambda-like polypeptide 5) protein is not fully understood. It is a member of the immunoglobulin superfamily and is primarily expressed in the B cells of the immune system. Some studies have suggested that IGLL5 may play a role in B cell receptor signa…	DEP
IGLC1	Can you tell me the function of the protein "IGLC1" (Immunoglobulin lambda constant 1) of human?	The function of the protein IGLC1, also known as immunoglobulin lambda constant 1, is to encode a constant region of immunoglobulin light chain. It plays a crucial role in the immune system by recognizing and binding to foreign substances, such as viruses and bacteria, and stimulating an immune response. The protein is found in plasma cells and is involved in the production of antibodies, which a…	DEP
C3	Can you tell me the function of the protein "C3" (Complement C3) of human?	The protein "C3" (Complement C3) of humans is an important component of the complement system, which is a part of the immune system. C3 is involved in the activation of the complement system and plays a key role in the innate immune response. It is a precursor protein that can be cleaved into several fragments, including C3a and C3b. C3b can bind to the surface of pathogens and mark them for dest…	DEP
CFB	Can you tell me the function of the protein "CFB" (Complement factor B) of human?	CFB (Complement factor B) is a serine protease that is a component of the alternative pathway of the complement system, which is a part of the body's immune system. CFB is activated by C3b, a protein fragment that is generated during the immune response, and cleaves C3 into C3a and C3b. This process helps in the opsonization of pathogens and activates the complement cascade, which leads to the el…	DEP
CLU	Can you tell me the function of the protein "CLU" (Clusterin) of human?	The protein Clusterin (CLU) plays a multifunctional role in human physiology. It is involved in various biological processes such as apoptosis, cell proliferation, lipid transport, inflammation, and tissue remodeling. CLU has been shown to have a protective effect against neurodegeneration and other cellular stressors. It is also involved in the immune response as well as in the regulation of the…	DEP
APOA4	Can you tell me the function of the protein "APOA4" (Apolipoprotein A-IV) of human?	APOA4 is a protein that plays a role in lipid metabolism, specifically in the transport and metabolism of triglyceride-rich lipoproteins. It is predominantly produced by the small intestine and is found in chylomicrons, very low-density lipoproteins (VLDL), and high-density lipoproteins (HDL). APOA4 also regulates food intake and influences satiety by acting on the brain's hypothalamus. Additiona…	DEP
LBP	Can you tell me the function of the protein "LBP" (Lipopolysaccharide-binding protein) of human?	The primary function of the Lipopolysaccharide-binding protein (LBP) in humans is to recognize and bind to lipopolysaccharides (LPS), which are found in the outer membrane of gram-negative bacteria. LBP acts as an opsonin, promoting the phagocytosis and killing of pathogens by immune cells. It also plays a role in innate immunity by promoting the activation of Toll-like receptors, which trigger t…	DEP
SYNM	Can you tell me the function of the protein "SYNM" (Synemin) of human?	The protein SYNM (synemin) is involved in providing structural support to cells and tissues, particularly in muscle cells. It is a type of intermediate filament protein that interacts with other cytoskeletal proteins to form a network that gives cells their shape and helps maintain their mechanical integrity. SYNM also plays a role in regulating cell division and differentiation, as well as in si…	DEP
IGLC6	Can you tell me the function of the protein "IGLC6" (Immunoglobulin lambda constant 6) of human?	The function of the protein IGLC6 is to act as a component of immunoglobulin lambda (Igλ) chains, which are part of the antibody molecules that play a crucial role in immune defense. Igλ chains, including IGLC6, combine with another type of chain (Ig heavy chain) to form complete antibody molecules capable of recognizing and binding to foreign substances (antigens). IGLC6 contributes to the struc…	DEP
IGLC2	Can you tell me the function of the protein "IGLC2" (Immunoglobulin lambda constant 2) of human?	The function of the protein IGLC2 (Immunoglobulin lambda constant 2) in humans is to be a component of the immunoglobulin lambda (IgL) chain. It is involved in the production of antibodies by B cells and is a critical component of the humoral immune response. The IgL chain is composed of two types of constant segments (CL) and two types of variable segments (VL). IGLC2 is one of the two constant …	DEP
IGLC3	Can you tell me the function of the protein "IGLC3" (Immunoglobulin lambda constant 3) of human?	The protein IGLC3 is a component of the immunoglobulin lambda light chain, which is involved in the recognition and neutralization of antigens in the immune system. It is known to be involved in the production of immunoglobulin classes like IgG, IgM, and IgA. It plays a crucial role in antibody-mediated immunity against pathogens, antigens, and toxins.	DEP
FLNC	Can you tell me the function of the protein "FLNC" (Filamin-C) of human?	Filamin-C (FLNC) is a protein that plays a major role in maintaining the structural integrity of cells. It is part of a family of proteins called filamins, which crosslink actin filaments and other components of the cytoskeleton, thereby providing cells with mechanical strength and stability. FLNC is especially important in muscle cells, where it is critical for proper contraction and movement. M…	DEP
SERPINF2	Can you tell me the function of the protein "SERPINF2" (Alpha-2-antiplasmin) of human?	The protein SERPINF2, also known as Alpha-2-antiplasmin, is an important regulator of the blood clotting system. It functions as a serine protease inhibitor, specifically inhibiting plasmin, which is an enzyme that promotes the breakdown of blood clots. SERPINF2 helps to prevent excessive fibrinolysis, the process by which blood clots are broken down, thereby maintaining normal blood clot formati…	DEP
HPX	Can you tell me the function of the protein "HPX" (Hemopexin) of human?	Yes, the function of the protein HPX or hemopexin in humans is to bind and transport heme molecules. Heme is a molecule that is part of hemoglobin, a protein found in red blood cells that is responsible for carrying oxygen in the blood. When heme is released, for example during hemolysis (breakdown of red blood cells), it can be toxic and cause damage to tissues. Hemopexin binds to heme and trans…	DEP
HRG	Can you tell me the function of the protein "HRG" (Histidine-rich glycoprotein) of human?	The exact function of HRG is not fully understood, but it is believed to play a role in several physiological processes, including blood coagulation, angiogenesis, and tumor progression. It is also known to interact with several other proteins, including fibrinogen, thrombospondin-1, and vascular endothelial growth factor (VEGF). HRG has been implicated in both pro- and anti-tumor effects, depend…	DEP
F2	Can you tell me the function of the protein "F2" (Prothrombin) of human?	Prothrombin (F2) is a protein that is involved in blood clotting. Specifically, prothrombin is converted into its active form (thrombin) during the coagulation cascade, which leads to the formation of a fibrin clot that helps to stop bleeding. F2 is synthesized in the liver and is an essential component of the clotting system. Mutations in the F2 gene can lead to various bleeding disorders or thr…	DEP
CAVIN2	Can you tell me the function of the protein "CAVIN2" (Caveolae-associated protein 2) of human?	CAVIN2 is a protein that is believed to play a role in the formation and maintenance of caveolae, which are small invaginations of the plasma membrane that are involved in endocytosis and signal transduction. Specifically, CAVIN2 is thought to interact with the protein caveolin to promote the formation of caveolae and to regulate their size and number. In addition, CAVIN2 has been found to be inv…	DEP
LUM	Can you tell me the function of the protein "LUM" (Lumican) of human?	Lumican is a small leucine-rich proteoglycan protein encoded by the LUM gene in humans. It is primarily expressed in the cornea, sclera, and skin. Lumican plays an essential role in the regulation of collagen fibril assembly and organization, as well as in the maintenance of corneal transparency, tensile strength, and wound healing. Lumican has also been shown to regulate inflammatory and immune …	DEP
IGKV2-28	Can you tell me the function of the protein "IGKV2-28" (Immunoglobulin kappa variable 2-28) of human?	The function of the protein IGKV2-28 (Immunoglobulin kappa variable 2-28) of human is that it encodes a variable region of an antibody that is involved in recognizing and binding to specific antigens. This protein is a member of the immunoglobulin superfamily, which plays a critical role in the immune response by recognizing and eliminating foreign substances such as bacteria, viruses, and other …	DEP
IGKV2-40	Can you tell me the function of the protein "IGKV2-40" (Immunoglobulin kappa variable 2-40) of human?	The protein IGKV2-40 is a component of the immunoglobulin kappa chain, which is involved in the production of antibodies in the human immune system. As a variable region of the immunoglobulin kappa chain, IGKV2-40 plays a role in determining the specificity of the antibody, allowing it to bind to a specific antigen. The specific function of IGKV2-40 may depend on the context of its expression, su…	DEP
IGKV2D-40	Can you tell me the function of the protein "IGKV2D-40" (Immunoglobulin kappa variable 2D-40) of human?	As an AI language model, I cannot scan internet and database searches like humans but from available resources, IGKV2D-40 is a variant of immunoglobulin kappa chains which is being expressed in B lymphocytes. Immunoglobulin kappa chains make up part of the B-cell receptor that plays a vital role in recognizing and targeting specific pathogens for destruction by the immune system. The precise func…	DEP
IGKV2D-28	Can you tell me the function of the protein "IGKV2D-28" (Immunoglobulin kappa variable 2D-28) of human?	As an AI language model, I don't have access to current scientific research and databases to provide the latest information on the protein "IGKV2D-28" function. However, as a general rule, Immunoglobulin kappa variable (IGKV) proteins play a crucial role in the immune system's function. Specifically, IGKV2D-28 is one of the subtypes of Ig kappa chains, which are building blocks of antibodies, and…	DEP
LMOD1	Can you tell me the function of the protein "LMOD1" (Leiomodin-1) of human?	Leiomodin-1 (LMOD1) is a protein that belongs to the actin-binding protein family. It serves as an important regulator of actin dynamics and plays a critical role in the assembly of thin filaments in smooth and cardiac muscles by binding to actin and promoting the elongation of actin filaments. LMOD1 is also involved in the regulation of actin cytoskeleton in non-muscle cells and is believed to p…	DEP
CKB	Can you tell me the function of the protein "CKB" (Creatine kinase B-type) of human?	The protein CKB (Creatine kinase B-type) is an enzyme that is primarily found in muscle tissue and brain tissue. Its function is to catalyze the transfer of high-energy phosphate from creatine phosphate to ADP, generating ATP, which is the primary energy source for cellular processes. In muscle tissue, CKB helps to maintain adequate ATP levels during periods of high energy demand, while in brain …	DEP
APOH	Can you tell me the function of the protein "APOH" (Beta-2-glycoprotein 1) of human?	The main function of the protein APOH (Beta-2-glycoprotein 1) in humans is to act as a cofactor for the activation of blood clotting factors, especially for the coagulation pathway. It also plays a role in regulating immune responses and helps in the clearance of apoptotic cells. Additionally, APOH has been implicated in various disorders, including thrombosis, autoimmune diseases, and cardiovasc…	DEP
SOD3	Can you tell me the function of the protein "SOD3" (Extracellular superoxide dismutase [Cu-Zn]) of human?	The protein SOD3 (Extracellular superoxide dismutase [Cu-Zn]) of human functions as an antioxidant enzyme that helps in removing the harmful molecules of superoxide radicals from the extracellular environment. It protects against oxidative damage by converting superoxide radicals into oxygen and hydrogen peroxide. SOD3 is primarily expressed in the lungs, and its deficiency can lead to various pu…	DEP
MATN2	Can you tell me the function of the protein "MATN2" (Matrilin-2) of human?	The protein MATN2 (Matrilin-2) is primarily expressed in cartilage and plays a role in the formation and maintenance of extracellular matrix (ECM) in various tissues including cartilage, intervertebral disc, and skeletal muscle. It is involved in the regulation of chondrocyte differentiation and hypertrophy, as well as the maintenance of joint homeostasis. MATN2 also interacts with other ECM prot…	DEP
SERPINC1	Can you tell me the function of the protein "SERPINC1" (Antithrombin-III) of human?	The main function of the protein SERPINC1 (Antithrombin-III) in humans is to inhibit blood clotting by inactivating thrombin and several coagulation factors (such as factors IXa, Xa, XIa and XIIa) involved in the blood clotting cascade. This prevents the formation of blood clots in the blood vessels and reduces the risk of thrombosis (formation of abnormal blood clots). In addition to its anticoa…	DEP
COL6A3	Can you tell me the function of the protein "COL6A3" (Collagen alpha-3(VI) chain) of human?	The protein COL6A3 (Collagen alpha-3(VI) chain) is a component of type VI collagen, a type of fibrous protein that is found in many tissues throughout the body, including the skin, muscles, and connective tissue. Type VI collagen plays a role in supporting the structure and strength of these tissues. In particular, COL6A3 is involved in the formation or maintenance of the extracellular matrix, wh…	DEP
PRPH	Can you tell me the function of the protein "PRPH" (Peripherin) of human?	The protein PRPH (Peripherin) plays a role in the formation and maintenance of neuronal structures, particularly in sensory and autonomic neurons. It interacts with other cytoskeletal proteins to form intermediate filaments that provide structural support for neurons. Mutations in the PRPH gene have been associated with various neurological disorders, including Charcot-Marie-Tooth disease and amy…	DEP
CP	Can you tell me the function of the protein "CP" (Ceruloplasmin) of human?	Ceruloplasmin is a multifunctional protein that plays several roles in the body, including	DEP
KNG1	Can you tell me the function of the protein "KNG1" (Kininogen-1) of human?	The protein KNG1 (Kininogen-1) is a precursor protein that plays a role in the regulation of blood coagulation and fibrinolysis. It is also involved in the generation of bradykinin, which is a vasodilator that mediates inflammation and pain. Additionally, KNG1 has been implicated in modulating angiogenesis and wound healing.	DEP
NT5E	Can you tell me the function of the protein "NT5E" (5'-nucleotidase) of human?	The protein NT5E (5'-nucleotidase) in humans functions as an enzyme that catalyzes the hydrolysis of the phosphate group from nucleotides, producing a corresponding nucleoside and inorganic phosphate. It is involved in purine metabolism and plays a role in regulating extracellular ATP levels. Additionally, mutations in the NT5E gene have been linked to various diseases including calcification of …	DEP
C9	Can you tell me the function of the protein "C9" (Complement component C9) of human?	The protein "C9" (Complement component C9) is a component of the complement system, which is a part of the immune system. This protein functions by forming a transmembrane channel in the membranes of cells targeted for destruction by the complement system. This channel, known as the membrane attack complex or MAC, can cause cell lysis and death. C9 is the ninth component in a sequence of reaction…	DEP
AHSG	Can you tell me the function of the protein "AHSG" (Alpha-2-HS-glycoprotein) of human?	The AHSG protein (Alpha-2-HS-glycoprotein) in humans has multi-functional properties. It primarily acts as a transport protein in the circulation, binding to and transporting calcium ions and heavy metals such as nickel, copper, and zinc. It also has been found to play a role in various physiological processes such as regulation of bone mineralization, modulation of insulin sensitivity and glucos…	DEP
SERPINA6	Can you tell me the function of the protein "SERPINA6" (Corticosteroid-binding globulin) of human?	The primary function of SERPINA6, also known as corticosteroid-binding globulin (CBG), is the binding and transport of glucocorticoid hormones, such as cortisol, in the bloodstream. It acts as a carrier protein for cortisol, which is a steroid hormone involved in the body's stress response, metabolism, and immune function. CBG regulates the amount of cortisol available to tissues by controlling i…	DEP
A1BG	Can you tell me the function of the protein "A1BG" (Alpha-1B-glycoprotein) of human?	The function of the protein A1BG (Alpha-1B-glycoprotein) is not fully understood yet but it is believed to play a role in regulating the immune system, lipid metabolism, and protection against oxidative stress. It is also involved in the transport of heme, copper, and fatty acids. Additionally, A1BG can bind to different molecules including hormones, lipids, and drugs, suggesting a possible role …	DEP
TF	Can you tell me the function of the protein "TF" (Serotransferrin) of human?	Serotransferrin (TF) is a glycoprotein that serves as the primary carrier of iron in the bloodstream. It binds to iron ions and transports them throughout the body, delivering them to cells and tissues that require iron for various biological functions. Additionally, TF plays an important role in regulating the level of iron in the body, helping to prevent iron deficiency and iron overload. It is…	DEP
A2M	Can you tell me the function of the protein "A2M" (Alpha-2-macroglobulin) of human?	The main function of A2M is to inhibit proteases (enzymes that break down proteins) by trapping and forming a complex with them. It is involved in the clearance of proteases and growth factors, regulation of inflammatory processes, and modulating the immune response. A2M also has anti-viral and anti-bacterial properties.	DEP
C7	Can you tell me the function of the protein "C7" (Complement component C7) of human?	The protein C7 (complement component C7) is a component of the complement system, which is part of the immune system. Specifically, C7 is involved in the formation of the membrane attack complex (MAC), which is a group of complement proteins that can cause damage to bacterial and fungal membranes. C7 binds to C5b-6, another complement protein, to form the C5b-7 complex, which then recruits additi…	DEP
PRELP	Can you tell me the function of the protein "PRELP" (Prolargin) of human?	PRELP (Prolargin) is a protein that is primarily found in connective tissues like cartilage and bone. It is thought to play a role in the formation and maintenance of these tissues. Specifically, PRELP has been shown to interact with other extracellular matrix proteins, helping to stabilize and organize them. Additionally, PRELP may have anti-inflammatory properties and may also be involved in ce…	DEP
TPPP3	Can you tell me the function of the protein "TPPP3" (Tubulin polymerization-promoting protein family member 3) of human?	The function of the protein TPPP3 is not fully understood, but it is suggested to play a role in regulating the assembly and disassembly of microtubules, which are important structures for cell division, intracellular transport, and cell shape maintenance. Additionally, TPPP3 may be involved in neuronal development and function, as it is highly expressed in the brain and has been linked to certai…	DEP
IGHG2	Can you tell me the function of the protein "IGHG2" (Immunoglobulin heavy constant gamma 2) of human?	IGHG2 is a protein that is a component of immunoglobulin G (IgG) antibodies, which are the most abundant type of antibody in human serum. The main function of IgG antibodies is to recognize and bind to pathogens, such as bacteria and viruses, in order to promote their destruction by other components of the immune system, such as phagocytes and complement proteins. The constant gamma 2 region of t…	DEP
CAV3	Can you tell me the function of the protein "CAV3" (Caveolin-3) of human?	CAV3 (Caveolin-3) is a protein that is primarily found in muscle tissue. It plays a critical role in the formation of membrane structures called caveolae, which are involved in various cellular processes such as cell signaling, endocytosis, and cholesterol homeostasis. Additionally, CAV3 is necessary for the proper functioning of muscle cells, as mutations in the gene that codes for CAV3 can lead…	DEP
CAV1	Can you tell me the function of the protein "CAV1" (Caveolin-1) of human?	CAV1 (Caveolin-1) is a protein that plays a crucial role in the formation and function of caveolae, which are small invaginations in the plasma membrane of cells. Caveolae are involved in various cellular processes, such as signal transduction, endocytosis, and cholesterol homeostasis. CAV1 is also involved in regulating lipid metabolism and cell signaling pathways, including those involved in ce…	DEP
TPM1	Can you tell me the function of the protein "TPM1" (Tropomyosin alpha-1 chain) of human?	The protein TPM1 (Tropomyosin alpha-1 chain) of human is a type of muscle protein that is involved in regulating the contraction and relaxation of muscles. It forms a complex with other proteins to create actin filaments, which play a role in the structure and function of muscle cells. TPM1 helps to stabilize these actin filaments, ensuring their proper alignment and interaction with other muscle…	DEP
ABI3BP	Can you tell me the function of the protein "ABI3BP" (Target of Nesh-SH3) of human?	The protein ABI3BP, also known as ABI1BP, is a tumor suppressor protein that plays a role in regulating cell growth and proliferation. It has been shown to inhibit the growth and migration of cancer cells and is downregulated in many types of cancer. The protein also plays a role in angiogenesis, the formation of blood vessels, and can promote the regeneration of damaged tissues. It interacts wit…	DEP
AMBP	Can you tell me the function of the protein "AMBP" (Protein AMBP) of human?	The protein AMBP (Alpha-1-microglobulin/bikunin precursor) is a multifunctional protein that has several roles in the human body. It is synthesized and secreted by the liver and can be found in various bodily fluids such as blood, urine, and cerebrospinal fluid.The main functions of AMBP include	DEP
ALB	Can you tell me the function of the protein "ALB" (Serum albumin) of human?	The protein "ALB" (Serum albumin) of humans serves as a transporter for various substances, such as hormones, fatty acids, and drugs, in the blood. It also helps to maintain the oncotic pressure of the blood, which is necessary for fluid balance within the body. Additionally, ALB plays a role in regulating the pH of the blood and acts as an antioxidant.	DEP
COL6A1	Can you tell me the function of the protein "COL6A1" (Collagen alpha-1(VI) chain) of human?	Collagen alpha-1(VI) chain is a protein encoded by the COL6A1 gene. It is a major constituent of the extracellular matrix in various tissues, including skin, tendons, and cartilage. The primary function of COL6A1 is to provide structural support and stability to these tissues. Additionally, it plays a crucial role in cell adhesion, differentiation, and proliferation. Mutations in the COL6A1 gene …	DEP
ACTC1	Can you tell me the function of the protein "ACTC1" (Actin, alpha cardiac muscle 1) of human?	The protein ACTC1 is a member of the actin protein family and is specifically expressed in cardiac muscle tissue. It plays an important role in the contraction of the heart muscle, which enables the heart to pump blood throughout the body. The ACTC1 protein forms the structural backbone of the sarcomere, the basic contractile unit of the heart muscle, and works with other proteins to generate for…	DEP
ACTA1	Can you tell me the function of the protein "ACTA1" (Actin, alpha skeletal muscle) of human?	The protein ACTA1 is a major component of muscle fibers and is responsible for their contraction. It is specifically found in skeletal muscle and plays a crucial role in muscle movement and maintenance of muscle structure. Mutations in the ACTA1 gene can lead to various muscle disorders, such as congenital myopathy and nemaline myopathy.	DEP
OGN	Can you tell me the function of the protein "OGN" (Mimecan) of human?	The OGN (Mimecan) protein is a member of the small leucine-rich proteoglycan (SLRP) family, primarily found in extracellular matrix (ECM) of connective tissues. It interacts with various ECM components such as collagens, fibronectin, and other SLRPs and regulates ECM assembly and organization, cell adhesion, proliferation, and differentiation. Additionally, OGN is reported to modulate signaling p…	DEP
DCN	Can you tell me the function of the protein "DCN" (Decorin) of human?	DCN (Decorin) is a protein found in human skin, tendons, cartilage, and other connective tissues. It plays a crucial role in regulating the growth and development of these tissues, as well as in wound healing and tissue repair. Specifically, DCN binds to and regulates the activity of various growth factors and signaling molecules, such as TGF-β and the insulin-like growth factor receptor, by prev…	DEP
COL6A2	Can you tell me the function of the protein "COL6A2" (Collagen alpha-2(VI) chain) of human?	The protein COL6A2 (Collagen alpha-2(VI) chain) is a component of collagen VI, a microfibrillar protein that is an important component of the extracellular matrix in many tissues including skin, muscle, and blood vessels. It has been shown to be involved in various biological processes including cell adhesion, migration, and differentiation. Mutations in the gene encoding COL6A2 have been linked …	DEP
MYH11	Can you tell me the function of the protein "MYH11" (Myosin-11) of human?	The protein MYH11, also known as smooth muscle myosin heavy chain, is a motor protein that is predominantly expressed in smooth muscle cells. It functions in muscle contraction by using ATP to convert chemical energy into mechanical force, enabling the contraction and relaxation of smooth muscle cells. Specifically, MYH11 plays a critical role in regulating vascular smooth muscle tone and blood p…	DEP
PGM5	Can you tell me the function of the protein "PGM5" (Phosphoglucomutase-like protein 5) of human?	The function of the protein PGM5 in humans is still not fully understood. However, some studies suggest that it may play a role in regulating calcium signaling in cells and may be involved in the development of certain diseases, such as diabetes and cancer. Additionally, some research suggests that PGM5 may be involved in the regulation of mitochondrial function and apoptosis (programmed cell dea…	DEP
DES	Can you tell me the function of the protein "DES" (Desmin) of human?	Desmin (DES) is a protein that is primarily found in muscle cells, including both cardiac and skeletal muscle. It plays an important role in the structural integrity of these muscles by linking individual muscle fibers together and helping them to contract and relax in a coordinated manner. In addition to its structural functions, DES has also been implicated in various cellular signaling pathway…	DEP
TNXB	Can you tell me the function of the protein "TNXB" (Tenascin-X) of human?	The protein TNXB (Tenascin-X) in humans is a component of the extracellular matrix, which provides structural support to tissues and organs. TNXB is involved in the organization and stabilization of collagen fibers, which help to maintain the strength and elasticity of tissues such as skin, bone, and cartilage. Mutations in the TNXB gene have been associated with various connective tissue disorde…	DEP
TNXA	Can you tell me the function of the protein "TNXA" (Putative tenascin-XA) of human?	The function of the protein TNXA (Putative tenascin-XA) of humans is believed to be involved in the extracellular matrix (ECM) organization, cell adhesion, and tissue development. Tenascin-XA is a member of the tenascin family of extracellular matrix glycoproteins that are known to play important roles in cell adhesion, migration, proliferation, and tissue morphogenesis. However, the exact functi…	DEP
OLFML3	Can you tell me the function of the protein "OLFML3" (Olfactomedin-like protein 3) of human?	OLFML3 is a protein that is found in various tissues in the human body, including the eyes, brain, and heart. Its exact function is not well understood but it is believed to play a role in cell adhesion and signaling pathways. Additionally, studies have suggested that OLFML3 may be involved in the regulation of angiogenesis, which is the formation of new blood vessels. It has also been linked to …	DEP
COL14A1	Can you tell me the function of the protein "COL14A1" (Collagen alpha-1(XIV) chain) of human?	The protein COL14A1 is a component of collagen, which is the main structural protein in various connective tissues such as skin, bone, cartilage, and tendons. Specifically, the alpha-1(XIV) chain is involved in the formation of fibrils in the extracellular matrix of connective tissues. This protein is also thought to play a role in regulating cell growth and differentiation. Mutations in the COL1…	DEP
NCAM1	Can you tell me the function of the protein "NCAM1" (Neural cell adhesion molecule 1) of human?	The protein NCAM1 (Neural cell adhesion molecule 1) in humans is mainly involved in cell-cell adhesion, signaling, and neural development. It is a glycoprotein expressed on the surface of various cells, including neurons and other cells of the nervous system, as well as cells in other tissues.NCAM1 acts as a mediator of cell adhesion and migration during the development of the nervous system. It …	DEP
COL28A1	Can you tell me the function of the protein "COL28A1" (Collagen alpha-1(XXVIII) chain) of human?	COL28A1 (Collagen alpha-1(XXVIII) chain) is a protein that belongs to the collagen family and plays a role in the extracellular matrix (ECM). It is found in various tissues, including cartilage, skin, and spinal cord. The exact function of COL28A1 is not well understood, but it is thought to be involved in the regulation of cell adhesion and migration, tissue development, and wound healing. Some …	DEP
AOC3	Can you tell me the function of the protein "AOC3" (Membrane primary amine oxidase) of human?	The AOC3 protein is also known as the membrane primary amine oxidase (MAO) or vascular adhesion protein-1 (VAP-1). AOC3 is a flavin-containing enzyme that is mainly expressed on vascular endothelial cells and has been implicated in various physiological processes such as leukocyte rolling, immune cell infiltration, and regulation of vascular permeability. The primary function of AOC3 is to cataly…	DEP
MRGPRF	Can you tell me the function of the protein "MRGPRF" (Mas-related G-protein coupled receptor member F) of human?	The protein MRGPRF (Mas-related G-protein coupled receptor member F) is involved in the regulation of pain and inflammation in humans. This receptor is specifically activated by peptides derived from the immune system and contributes to the sensation of pain and the initiation of inflammation in response to tissue damage or infection. It is mainly expressed in sensory neurons, including those tha…	DEP
FHL1	Can you tell me the function of the protein "FHL1" (Four and a half LIM domains protein 1) of human?	The protein FHL1 (Four and a half LIM domains protein 1) in humans is a multifunctional protein that plays a role in diverse cellular processes including muscle development, gene transcription, and cell signaling. It is primarily found in skeletal and cardiac muscle cells and helps to regulate muscle cell growth and differentiation. FHL1 has also been implicated in the development of certain canc…	DEP
OLFML1	Can you tell me the function of the protein "OLFML1" (Olfactomedin-like protein 1) of human?	OLFML1 is a secreted glycoprotein that is involved in various biological processes such as cell adhesion, neuronal development, and angiogenesis. It plays a crucial role in maintaining the structural and functional integrity of the extracellular matrix by interacting with extracellular matrix proteins and regulating their organization. OLFML1 has also been shown to have a role in the regulation o…	DEP
PTGDS	Can you tell me the function of the protein "PTGDS" (Prostaglandin-H2 D-isomerase) of human?	The protein PTGDS (Prostaglandin-H2 D-isomerase) in humans is responsible for the conversion of prostaglandin H2 (PGH2) to prostaglandin D2 (PGD2). PGD2 is a mediator of inflammation and is involved in the regulation of various physiological processes, including sleep-wake cycles, smooth muscle contractility, and immune responses. PTGDS is primarily expressed in the brain, but is also present in …	DEP
BRI3BP	Can you tell me the function of the protein "BRI3BP" (BRI3-binding protein) of human?	The exact function of BRI3BP is not well understood, but it has been suggested to play a role in immune response and signaling. Specifically, it has been observed to interact with BRI3, a protein known to regulate the production of beta-amyloid peptides that play a role in Alzheimer's disease. BRI3BP has also been identified as a potential biomarker for certain cancers, including gastric and colo…	DEP
PARP9	Can you tell me the function of the protein "PARP9" (Protein mono-ADP-ribosyltransferase PARP9) of human?	PARP9 is a member of the PARP (Poly(ADP-ribose) polymerase) family of proteins that catalyze the transfer of ADP-ribose moieties to target proteins, thereby regulating a wide range of cellular processes. Specifically, PARP9 functions as a mono-ADP-ribosyltransferase, meaning it transfers one ADP-ribose moiety onto target proteins. PARP9 has been shown to play a role in DNA damage repair, inflamma…	DEP
U2AF1L5	Can you tell me the function of the protein "U2AF1L5" (Splicing factor U2AF 35 kDa subunit-like protein) of human?	U2AF1L5 is a splicing factor protein that plays a critical role in mRNA splicing by recognizing and binding to specific RNA sequence elements at splice junctions. U2AF1L5 is involved in the selection of 3' splice sites during the splicing process, and its activity is essential for the accurate and efficient production of properly spliced mRNA transcripts. Mutations in the U2AF1L5 gene have been l…	DEP
U2AF1	Can you tell me the function of the protein "U2AF1" (Splicing factor U2AF 35 kDa subunit) of human?	The U2AF1 protein, also known as the splicing factor U2AF 35 kDa subunit, plays a crucial role in pre-mRNA splicing. Specifically, it binds to the polypyrimidine tract near the 3' splice site of the pre-mRNA, allowing the recruitment of other splicing factors and components of the spliceosome machinery to assemble and execute the splice. Without U2AF1, proper splicing cannot occur, leading to err…	DEP
U2AF1L4	Can you tell me the function of the protein "U2AF1L4" (Splicing factor U2AF 26 kDa subunit) of human?	The U2AF1L4 protein is involved in pre-mRNA splicing, which is the process of removing introns (non-coding regions) from pre-mRNA and joining the remaining exons (coding regions) together to form mature mRNA. U2AF1L4 is a subunit of the U2 small nuclear ribonucleoprotein auxiliary factor (U2AF), which binds to the 3' splice site of the pre-mRNA and recruits the spliceosome to carry out splicing. …	DEP
RBM8A	Can you tell me the function of the protein "RBM8A" (RNA-binding protein 8A) of human?	RBM8A is a protein that functions as a RNA-binding protein, which plays an important role in post-transcriptional regulation of gene expression by binding to RNA and modulating its stability, transport, processing, and translation. It is also involved in the regulation of alternative splicing and nonsense-mediated mRNA decay (NMD), which are essential mechanisms for generating protein diversity a…	DEP
SLC25A5	Can you tell me the function of the protein "SLC25A5" (ADP/ATP translocase 2) of human?	The SLC25A5 protein, also known as ADP/ATP translocase 2, is responsible for catalyzing the exchange of adenosine triphosphate (ATP) and adenosine diphosphate (ADP) across the inner mitochondrial membrane. This protein plays a critical role in energy metabolism by facilitating the transport of ATP, which is produced in the mitochondrial matrix, to the cytosol of cells where it can be used as a so…	DEP
SLC25A31	Can you tell me the function of the protein "SLC25A31" (ADP/ATP translocase 4) of human?	The protein SLC25A31 (ADP/ATP translocase 4) is responsible for transporting ATP (adenosine triphosphate) and ADP (adenosine diphosphate) across the mitochondrial inner membrane, which is crucial for many energy-dependent processes in the cell. Specifically, SLC25A31 catalyzes the exchange of cytosolic ATP for mitochondrial ADP, allowing for the replenishment of ATP levels in the mitochondria, wh…	DEP
SF3B4	Can you tell me the function of the protein "SF3B4" (Splicing factor 3B subunit 4) of human?	The SF3B4 protein is a component of the spliceosome, a complex of RNA and protein that removes introns from pre-mRNA during mRNA splicing. Specifically, SF3B4 is a subunit of the SF3B complex, which binds to the branch site sequence of introns and participates in the catalytic step of splicing. Mutations in SF3B4 have been associated with various cancers and genetic disorders.	DEP
GLRX3	Can you tell me the function of the protein "GLRX3" (Glutaredoxin-3) of human?	The protein GLRX3 (Glutaredoxin-3) of human plays a role in redox regulation, which involves maintaining a balance between oxidizing and reducing agents in the cell. It is involved in the regulation of gene expression, cell proliferation, differentiation, and signaling pathways. GLRX3 is also involved in the maintenance of mitochondrial function and resistance to oxidative stress. Additionally, i…	DEP
FYCO1	Can you tell me the function of the protein "FYCO1" (FYVE and coiled-coil domain-containing protein 1) of human?	The protein FYCO1 plays a crucial role in autophagy, which is a process where cells break down and recycle damaged or unnecessary cellular components. FYCO1 specifically helps in the formation of autophagosomes, which are vesicles that enclose cellular components to be broken down by lysosomes. This process is essential for maintaining cellular homeostasis and preventing the accumulation of damag…	DEP
ANO6	Can you tell me the function of the protein "ANO6" (Anoctamin-6) of human?	ANO6, also known as Anoctamin-6, is a protein that functions as a calcium-activated chloride channel. It plays a critical role in many physiological processes, including chloride secretion, fluid secretion, and electrolyte balance. Additionally, ANO6 is involved in calcium signaling, membrane fusion, and exocytosis. Dysfunction of ANO6 has been linked to several diseases, including cystic fibrosi…	DEP
RAB34	Can you tell me the function of the protein "RAB34" (Ras-related protein Rab-34) of human?	The function of RAB34 (Ras-related protein Rab-34) is not well characterized, but it is believed to be involved in intracellular vesicular trafficking, specifically in the regulation of endocytic transport from the plasma membrane to endosomes. It may also play a role in the regulation of autophagy and phagocytosis. Additionally, there is some evidence that RAB34 may be involved in the proliferat…	DEP
SCRN1	Can you tell me the function of the protein "SCRN1" (Secernin-1) of human?	SCRN1 is a protein that is involved in vesicle trafficking, secretion, and exocytosis. It works by regulating the release of vesicles containing neurotransmitters, hormones, and other signaling molecules from the cell. It is also believed to be involved in regulating the growth and differentiation of neurons in the brain. Additionally, recent studies have suggested that SCRN1 is involved in the i…	DEP
LNPK	Can you tell me the function of the protein "LNPK" (Endoplasmic reticulum junction formation protein lunapark) of human?	The protein LNPK, also known as Endoplasmic reticulum junction formation protein lunapark, is involved in the formation of endoplasmic reticulum (ER) junctions with other organelles such as the mitochondria and plasma membrane. It helps in the regulation of intracellular Ca2+ concentration, lipid metabolism, and cell signaling. The precise function of LNPK is not yet fully understood, but studies…	DEP
PCYOX1	Can you tell me the function of the protein "PCYOX1" (Prenylcysteine oxidase 1) of human?	The protein PCYOX1 (Prenylcysteine oxidase 1) of human functions as an enzyme that catalyzes the oxidative cleavage of prenylated cysteine residues in proteins. This process is crucial for the regulation of protein signaling and trafficking pathways in cells. PCYOX1 plays a role in the mevalonate pathway, which is involved in the biosynthesis of isoprenoid compounds, including cholesterol and ste…	DEP
SNTB2	Can you tell me the function of the protein "SNTB2" (Beta-2-syntrophin) of human?	Beta-2-syntrophin (SNTB2) is a cytoplasmic protein that plays a crucial role in the organization and stabilization of the plasma membrane in human cells. It forms a complex with other proteins, including dystrophin, to anchor the cytoskeleton to the extracellular matrix, thereby preventing cellular damage and maintaining cellular integrity. Additionally, SNTB2 interacts with ion channels and sign…	DEP
HIST1H1D	Can you tell me the function of the protein "HIST1H1D" (Histone H1.3) of human?	The protein HIST1H1D (Histone H1.3) is a member of the histone H1 family of proteins, which are important components of chromatin, the structural material that packages DNA into chromosomes. Histone H1.3 is specifically involved in regulating gene expression and chromatin structure. It functions to compact DNA and stabilize nucleosomes, preventing the unwinding of DNA and allowing for efficient p…	DEP
VCL	Can you tell me the function of the protein "VCL" (Vinculin) of human?	The protein VCL, also known as Vinculin, is involved in the process of cell adhesion and motility. It acts as a molecular linker between the actin cytoskeleton and the extracellular matrix, and plays a key role in the formation of focal adhesions, which are necessary for the cell to adhere to its surroundings and move within its environment. Vinculin also regulates the tension and stiffness of ce…	DEP
BIN1	Can you tell me the function of the protein "BIN1" (Myc box-dependent-interacting protein 1) of human?	BIN1 protein (Myc box-dependent-interacting protein 1) of human is involved in multiple cellular processes such as endocytosis, membrane trafficking, and cytoskeletal organization. It plays a crucial role in the formation of invaginations or tubules in the plasma membrane, which are necessary for endocytosis. BIN1 also interacts with Myc protein, modulating its activity and promoting its degradat…	DEP
TOR3A	Can you tell me the function of the protein "TOR3A" (Torsin-3A) of human?	As an AI language model, I do not have the most recent information about the topic. However, based on the information available on scientific literature, the function of the protein "TOR3A" (Torsin-3A) is not yet fully understood. Torsins are members of the AAA+ (ATPases associated with various cellular activities) superfamily of proteins that are predominantly localized to the endoplasmic reticu…	DEP
C1R	Can you tell me the function of the protein "C1R" (Complement C1r subcomponent) of human?	The protein "C1R" (Complement C1r subcomponent) of human is a serine protease that plays a crucial role in the complement pathway. It is a component of the C1 complex, which initiates the classical complement pathway. Upon activation, C1R cleaves C4 and C2 to form C3 convertase, which cleaves C3 to form C5 convertase, leading to the production of membrane attack complex (MAC) and subsequent destr…	DEP
AEBP1	Can you tell me the function of the protein "AEBP1" (Adipocyte enhancer-binding protein 1) of human?	AEBP1 is a protein that plays a role in adipogenesis, the process of adipocyte (fat cell) differentiation and maturation. It is also involved in regulating gene expression, cell proliferation, and apoptosis. In addition, AEBP1 has been shown to play a role in inflammation and cancer progression.	DEP
CACNA2D1	Can you tell me the function of the protein "CACNA2D1" (Voltage-dependent calcium channel subunit alpha-2/delta-1) of human?	The protein CACNA2D1 is a subunit of the voltage-dependent calcium channel, which regulates the flow of calcium ions into cells. It is primarily expressed in brain and skeletal muscle tissue and plays a role in neurotransmitter release, synaptic plasticity, and muscle contraction. CACNA2D1 has also been linked to several neurological and neuropsychiatric disorders including epilepsy, autism spect…	DEP
DCLK1	Can you tell me the function of the protein "DCLK1" (Serine/threonine-protein kinase DCLK1) of human?	The protein DCLK1 (Serine/threonine-protein kinase DCLK1) is primarily involved in the regulation of cell differentiation and proliferation in various tissues, including the brain, lungs, and digestive system. It is a member of the CAMK (calcium/calmodulin-dependent protein kinase) superfamily and acts as a key regulator of the Wnt signaling pathway, which plays crucial roles in tissue developmen…	DEP
DCX	Can you tell me the function of the protein "DCX" (Neuronal migration protein doublecortin) of human?	DCX (Neuronal migration protein doublecortin) is a protein that plays a critical role in neuronal migration during brain development. It is involved in the formation and organization of the cortex and is essential for the proper migration of neurons to their appropriate locations in the brain. DCX is also important for the development of the nervous system, and mutations in the gene that encodes …	DEP
ITIH4	Can you tell me the function of the protein "ITIH4" (Inter-alpha-trypsin inhibitor heavy chain H4) of human?	The protein ITIH4 (Inter-alpha-trypsin inhibitor heavy chain H4) of human is involved in the inhibition of protease activity, regulation of recognition and clearance of apoptotic cells, and modulation of immune responses. It also plays a role in the regulation of inflammation and blood coagulation. Additionally, ITIH4 has been implicated in the development and progression of certain cancers.	DEP
APOC2	Can you tell me the function of the protein "APOC2" (Apolipoprotein C-II) of human?	APOC2 (Apolipoprotein C-II) is a protein found in human blood plasma and it plays a crucial role in lipid metabolism. It is primarily synthesized in the liver and is initially found in the outer surface of very low-density lipoprotein (VLDL) that is secreted by the liver.The main function of APOC2 is to activate lipoprotein lipase (LPL), an enzyme that breaks down triglycerides, a type of fat, in…	DEP
IGHV4-61	Can you tell me the function of the protein "IGHV4-61" (Immunoglobulin heavy variable 4-61) of human?	IGHV4-61 is a specific gene that encodes for the variable region of the heavy chain of an antibody protein (immunoglobulin). The function of immunoglobulins is to recognize and bind to foreign molecules or pathogens, such as viruses or bacteria, in order to promote their neutralization, removal, or destruction by the immune system. Therefore, the function of the protein encoded by the IGHV4-61 ge…	DEP
IGHV4-39	Can you tell me the function of the protein "IGHV4-39" (Immunoglobulin heavy variable 4-39) of human?	The function of the protein IGHV4-39 is to encode a variable domain of the antibody gene, which is a key component of the immune system. It is specifically involved in the generation of the heavy chain of immunoglobulin molecules, which are responsible for recognizing and binding to specific antigens in order to initiate an immune response. The precise role of IGHV4-39 may vary depending on the p…	DEP
IGHV4-59	Can you tell me the function of the protein "IGHV4-59" (Immunoglobulin heavy variable 4-59) of human?	IGHV4-59 is a specific gene that encodes a variable region of the heavy chain of human immunoglobulin. Its function is to produce a specific antibody that is able to recognize and bind to a certain antigen or pathogen, thereby initiating an immune response. The exact target of this specific antibody is not known without additional information about what it is binding to in a specific context.	DEP
IGHV4-34	Can you tell me the function of the protein "IGHV4-34" (Immunoglobulin heavy variable 4-34) of human?	The function of the protein IGHV4-34 (Immunoglobulin heavy variable 4-34) in humans is to encode a variable region of the immunoglobulin heavy chain. It is involved in the creation of antibodies, which are critical components of the human immune system that help to identify and neutralize foreign invaders, such as viruses or bacteria. Specifically, IGHV4-34 is known to play a role in the producti…	DEP
IGHV4-30-4	Can you tell me the function of the protein "IGHV4-30-4" (Immunoglobulin heavy variable 4-30-4) of human?	As an AI language model, I do not have access to the specific function of IGHV4-30-4 in humans. However, generally speaking, immunoglobulins are also known as antibodies and are essential components of the immune system. They recognize and bind to specific pathogens or foreign substances, facilitating their elimination by other immune cells. Each antibody has a unique antigen-binding site that is…	DEP
IGHV4-31	Can you tell me the function of the protein "IGHV4-31" (Immunoglobulin heavy variable 4-31) of human?	IGHV4-31 is a protein that belongs to the immunoglobulin superfamily and plays a key role in the generation of the diverse repertoire of antibodies produced by the human immune system. Specifically, IGHV4-31 is a variable region of the heavy chain of the antibody molecule, which is responsible for binding to specific antigens. It is involved in the recognition and neutralization of a wide variety…	DEP
IGHV4-38-2	Can you tell me the function of the protein "IGHV4-38-2" (Immunoglobulin heavy variable 4-38-2) of human?	IGVH4-38-2 is a subtype of the immunoglobulin heavy variable chain that is a component of the antibody produced by B cells in the immune system. The function of the specific protein is to recognize and bind to foreign substances, called antigens, to initiate the immune response and trigger the production of antibodies. The IGHV4-38-2 variant is a specific sequence that confers binding specificity…	DEP
AKAP12	Can you tell me the function of the protein "AKAP12" (A-kinase anchor protein 12) of human?	AKAP12 is a cytoskeletal protein that acts as a scaffold protein, interacting with multiple signaling molecules and anchoring them to the actin cytoskeleton. It plays a role in various signaling pathways, including regulation of cell adhesion, migration, and proliferation. AKAP12 is also involved in the regulation of gene expression and tumor suppression.	DEP
IGHV3-21	Can you tell me the function of the protein "IGHV3-21" (Immunoglobulin heavy variable 3-21) of human?	The protein IGHV3-21 is a type of immunoglobulin heavy variable chain that is involved in the production of antibodies. Specifically, it is a component of B-cell receptors that recognize and bind to foreign antigens, such as those from bacteria, viruses, and other pathogens. The IGHV3-21 protein plays a critical role in the adaptive immune response by allowing B-cells to produce highly specific a…	DEP
IGHV3-11	Can you tell me the function of the protein "IGHV3-11" (Immunoglobulin heavy variable 3-11) of human?	The function of the protein IGHV3-11 (Immunoglobulin heavy variable 3-11) in humans is to encode a specific variable region of the heavy chain of an antibody (immunoglobulin) called the B-cell receptor. This variable region is important in recognizing and binding to specific antigens (foreign particles or molecules) in order to initiate an immune response. Different variable regions are responsib…	DEP
IGHV3-48	Can you tell me the function of the protein "IGHV3-48" (Immunoglobulin heavy variable 3-48) of human?	The IGHV3-48 protein is part of the immunoglobulin heavy chain variable region, which is an essential component of the antibody molecule. Antibodies are proteins produced by the immune system that target and bind to specific foreign molecules (antigens) present in the body. The IGHV3-48 protein, along with other immunoglobulin heavy chain variable region proteins, helps confer antigen specificity…	DEP
IGHV3-7	Can you tell me the function of the protein "IGHV3-7" (Immunoglobulin heavy variable 3-7) of human?	The function of the protein IGHV3-7 is to code for the variable region of the heavy chain of immunoglobulin, which is a crucial component of the immune system. This variable region recognizes and binds to specific foreign antigens, triggering the production of antibodies to help fight infection and disease. Therefore, IGHV3-7 plays an essential role in the adaptive immune response of humans.	DEP
PYGM	Can you tell me the function of the protein "PYGM" (Glycogen phosphorylase, muscle form) of human?	The protein PYGM (Glycogen phosphorylase, muscle form) is responsible for catalyzing the breakdown of glycogen to glucose-1-phosphate in muscle tissues. This process is essential for providing energy to the muscle cells during periods of high activity or exercise. PYGM plays a crucial role in maintaining blood glucose levels and ensuring proper muscle function. Mutations in the PYGM gene can lead…	DEP
IGHG3	Can you tell me the function of the protein "IGHG3" (Immunoglobulin heavy constant gamma 3) of human?	The protein IGHG3 is a part of the immunoglobulin gamma chain, which is a type of antibody produced by the human immune system to fight against pathogens such as bacteria and viruses. It serves as the constant region of the heavy chain of immunoglobulin G (IgG) and has four different subclasses (IGHG1-4). The function of IGHG3 is to provide structural stability to IgG and to facilitate its bindin…	DEP
SAA4	Can you tell me the function of the protein "SAA4" (Serum amyloid A-4 protein) of human?	The primary function of the protein SAA4 (Serum amyloid A-4 protein) in humans is to regulate immune function and inflammatory response. It is an acute-phase protein that is produced in response to inflammation and infection. SAA4 works as a signaling molecule that activates immune cells and promotes the expression of inflammatory cytokines. It is also involved in the transport of cholesterol and…	DEP
ITIH5	Can you tell me the function of the protein "ITIH5" (Inter-alpha-trypsin inhibitor heavy chain H5) of human?	The protein ITIH5 (Inter-alpha-trypsin inhibitor heavy chain H5) of human is involved in the regulation of various biological processes such as inflammation, tissue repair, and immune response. It acts as an inhibitor of proteases, which are enzymes that break down other proteins. ITIH5 is also involved in the formation of extracellular matrix, which is important for maintaining the structure and…	DEP
SERPING1	Can you tell me the function of the protein "SERPING1" (Plasma protease C1 inhibitor) of human?	The function of the protein SERPING1 (Plasma protease C1 inhibitor) in humans is to inhibit the activity of several enzymes involved in the complement cascade, which is part of the immune system. It also regulates the activity of the coagulation system by inhibiting the activation of the protein C pathway. Additionally, SERPING1 plays a role in preventing excessive inflammation and tissue damage,…	DEP
RGN	Can you tell me the function of the protein "RGN" (Regucalcin) of human?	Yes, RGN (Regucalcin) is a protein found in humans that is involved in regulating calcium homeostasis, reducing oxidative stress, and modulating cell growth and differentiation. It acts as a suppressor of inflammation and has been implicated in various cellular processes such as glucose metabolism, lipid metabolism, and hormone signaling. Its exact function is still being researched.	DEP
IGKV2-24	Can you tell me the function of the protein "IGKV2-24" (Immunoglobulin kappa variable 2-24) of human?	The IGKV2-24 protein is a subtype of immunoglobulin kappa variable protein, which is a type of antibody produced by the immune system. Its functionality lies in recognizing and binding to specific antigens (foreign substances) and triggering an immune response to clear them from the body. IGKV2-24 is involved in the specific recognition and binding of antigens in the context of adaptive immune re…	DEP
PLG	Can you tell me the function of the protein "PLG" (Plasminogen) of human?	The protein PLG (Plasminogen) is a precursor of the enzyme plasmin, which helps to break down blood clots. It is an important component of the body's natural clotting and fibrinolysis (clot breakdown) systems, and is involved in many physiological processes, including wound healing and tissue remodeling. PLG also plays a role in inflammation, immunity, and cancer metastasis.	DEP
PLGLB1	Can you tell me the function of the protein "PLGLB1" (Plasminogen-like protein B) of human?	The function of PLGLB1 protein (Plasminogen-like protein B) in humans is not well characterized, but it is believed to be involved in the regulation of fibrinolysis (the breakdown of blood clots). It has also been suggested to play a role in extracellular matrix organization, cell migration, and tumor invasion. More research is needed to fully understand the function of PLGLB1 in humans.	DEP
PLGLA	Can you tell me the function of the protein "PLGLA" (Plasminogen-like protein A) of human?	As an AI language model, I do not have access to the most recent research data to provide you with an accurate answer. However, based on the limited information available, PLGLA (Plasminogen-like protein A) is believed to have a role in regulating immune responses and inflammation. It may also have a role in tissue repair and wound healing. More research is needed to fully understand the function…	DEP
TPM2	Can you tell me the function of the protein "TPM2" (Tropomyosin beta chain) of human?	TPM2 is a cytoskeletal protein that plays a crucial role in muscle contraction by regulating the interaction between actin and myosin. Specifically, tropomyosin binds to actin filaments and regulates the access of myosin to the actin, thus providing structural stability to the sarcomere and controlling the force generation during muscle contraction. In addition to its role in muscle function, TPM…	DEP
CNN1	Can you tell me the function of the protein "CNN1" (Calponin-1) of human?	The protein Calponin-1 (CNN1) is involved in regulating contraction of smooth muscle cells, which are found in organs such as the blood vessels, digestive tract, and uterus. CNN1 binds to actin filaments within smooth muscle cells, which allows for the regulation of muscle relaxation and contraction. Dysregulation of CNN1 expression or function has been linked to various diseases, including hyper…	DEP
PLIN4	Can you tell me the function of the protein "PLIN4" (Perilipin-4) of human?	The protein PLIN4 (Perilipin-4) plays a role in regulating the storage and release of lipids (fats) in cells. Specifically, it is involved in the formation of lipid droplets, which are storage compartments for lipids in cells. PLIN4 has also been implicated in the development of obesity and insulin resistance, as well as in the regulation of energy metabolism.	DEP
MFAP4	Can you tell me the function of the protein "MFAP4" (Microfibril-associated glycoprotein 4) of human?	The protein MFAP4 (Microfibril-associated glycoprotein 4) of human is involved in the formation and maintenance of extracellular matrix (ECM) structures. Specifically, it is a glycoprotein that associates with microfibrils, a type of ECM structure that plays a role in tissue elasticity and stability. MFAP4 has been shown to regulate the assembly and cross-linking of microfibrils and to modulate t…	DEP
GFPT1	Can you tell me the function of the protein "GFPT1" (Glutamine--fructose-6-phosphate aminotransferase [isomerizing] 1) of human?	The protein GFPT1 is an enzyme that is involved in the first and rate-limiting step of hexosamine biosynthesis pathway (HBP). The HBP is responsible for the generation of a few key metabolites, including UDP-GlcNAc, which are required for various cellular processes including protein glycosylation, inflammation, and insulin signaling. Therefore, GFPT1 plays a critical role in cellular homeostasis …	DEP
COL18A1	Can you tell me the function of the protein "COL18A1" (Collagen alpha-1(XVIII) chain) of human?	The protein COL18A1 is involved in the formation and maintenance of basement membranes, which are important structures that separate tissues and provide support to cells. It also plays a role in angiogenesis, the process of forming new blood vessels.	DEP
C4B	Can you tell me the function of the protein "C4B" (Complement C4-B) of human?	The protein C4B is part of the complement system, which is a group of proteins that work together to identify and destroy foreign invaders such as bacteria and viruses in the body. Specifically, C4B is involved in the activation of the complement system through cleavage and formation of C4b2b complex, which leads to the formation of the membrane attack complex (MAC) that destroys bacterial cell w…	DEP
CD5L	Can you tell me the function of the protein "CD5L" (CD5 antigen-like) of human?	CD5L (CD5 antigen-like) is a protein that plays a role in the regulation of the immune system. It is produced by a variety of immune cells, including T cells, B cells, and dendritic cells. CD5L helps to regulate the activation and proliferation of immune cells, and has been implicated in the control of inflammation and in the prevention of autoimmune diseases. It has also been shown to have anti-…	DEP
CFH	Can you tell me the function of the protein "CFH" (Complement factor H) of human?	CFH is a regulatory protein that plays a key role in reducing excessive activation of the complement system, which is an important part of the immune system involved in recognizing and destroying foreign pathogens. CFH helps to control complement-mediated inflammation and prevent damage to host cells and tissues by binding to C3b and inhibiting the formation of the C3 convertase enzyme that initi…	DEP
SERPINA3	Can you tell me the function of the protein "SERPINA3" (Alpha-1-antichymotrypsin) of human?	The protein SERPINA3 (Alpha-1-antichymotrypsin) of human is a protease inhibitor that regulates the activity of chymotrypsin-like proteases in various biological processes such as inflammation, coagulation, and tissue repairing. It is a member of the serine protease inhibitor (serpin) superfamily and is mainly synthesized in the liver. SERPINA3 binds and inhibits proteases, particularly chymotryp…	DEP
RFC4	Can you tell me the function of the protein "RFC4" (Replication factor C subunit 4) of human?	RFC4 is a subunit of Replication Factor C, which plays a vital role in DNA replication process by loading the sliding clamp protein PCNA (Proliferating Cell Nuclear Antigen) onto DNA. RFC4 specifically interacts with PCNA and helps to stabilize its binding to DNA, which is necessary for efficient DNA synthesis. Additionally, RFC4 has been implicated in DNA damage response and repair pathways, as …	DEP
MAP1B	Can you tell me the function of the protein "MAP1B" (Microtubule-associated protein 1B) of human?	MAP1B is a microtubule-associated protein that plays an important role in regulating the dynamics and stability of microtubules in neuronal cells. It is involved in the development and maintenance of neurites, including dendrites and axons, and is necessary for proper axonal transport of organelles and vesicles. MAP1B also plays a role in axon guidance, neuronal migration, and synaptic plasticity…	DEP
CNTN1	Can you tell me the function of the protein "CNTN1" (Contactin-1) of human?	The protein CNTN1 (Contactin-1) is a neural cell adhesion molecule that plays a crucial role in the development and maintenance of the nervous system. It facilitates the formation and maintenance of neuronal networks by promoting neural cell adhesion, neurite outgrowth, and myelination. CNTN1 is also involved in synaptic differentiation and plasticity during neuronal development and plays a criti…	DEP
MCM3	Can you tell me the function of the protein "MCM3" (DNA replication licensing factor MCM3) of human?	The protein "MCM3" (DNA replication licensing factor MCM3) of human is a component of the MCM2-7 hexameric helicase complex which plays a crucial role in DNA replication. MCM3 functions as a licensing factor, assisting in the initiation of DNA replication by unwinding the double helix in a controlled manner to create a replication fork. If MCM3 is absent or not functioning properly, it can result…	DEP
SPTBN1	Can you tell me the function of the protein "SPTBN1" (Spectrin beta chain, non-erythrocytic 1) of human?	SPTBN1 is a protein that is involved in the organization and maintenance of the cytoskeleton, which is the structural framework of cells. Specifically, SPTBN1 is a beta subunit of spectrin, which forms a network of filaments that contributes to the stability and elasticity of cell membranes. SPTBN1 also plays a role in the regulation of ion channels and receptors, as well as in cell migration and…	DEP
PROS1	Can you tell me the function of the protein "PROS1" (Vitamin K-dependent protein S) of human?	The protein PROS1 (Vitamin K-dependent protein S) of human is a cofactor that works with Protein C to regulate the coagulation process by inhibiting blood clot formation. It also has an anti-inflammatory function, helps in the clearance of apoptotic cells, and promotes the production of nitric oxide, which helps in the dilation of blood vessels. PROS1 deficiency can lead to a variety of condition…	DEP
APOB	Can you tell me the function of the protein "APOB" (Apolipoprotein B-100) of human?	The main function of the protein APOB (Apolipoprotein B-100) in humans is to transport lipids (fats) in the blood. It is a structural component of very low-density lipoprotein (VLDL) and low-density lipoprotein (LDL) particles. These lipoprotein particles carry cholesterol and triglycerides to different parts of the body where they are needed for various cellular functions. However, a high level …	DEP
ENPP1	Can you tell me the function of the protein "ENPP1" (Ectonucleotide pyrophosphatase/phosphodiesterase family member 1) of human?	ENPP1 is a glycoprotein that functions as a plasma membrane enzyme that catalyzes the hydrolysis of pyrophosphate and phosphodiester bonds. ENPP1 plays a crucial role in the regulation of extracellular ATP, which is involved in many physiological processes, including bone mineralization, insulin signaling, and energy metabolism. ENPP1 also contributes to the development of insulin resistance and …	DEP
SNTB1	Can you tell me the function of the protein "SNTB1" (Beta-1-syntrophin) of human?	The protein SNTB1 (Beta-1-syntrophin) is involved in the organization of signaling complexes at the cell membrane through interactions with multiple other proteins, including ion channels, receptors, and cytoskeletal components. It plays a crucial role in the regulation of various cellular processes, including the control of ion channel localization and activity, the maintenance of structural int…	DEP
IGHA1	Can you tell me the function of the protein "IGHA1" (Immunoglobulin heavy constant alpha 1) of human?	IGHA1 is a protein that is a component of the immunoglobulin A (IgA) antibody. IgA antibodies are produced by B-cells in the immune system and are found in body secretions such as saliva, tears, and breast milk, as well as in blood. The function of IgA antibodies is to provide protection against infections by binding to and neutralizing pathogens such as bacteria and viruses. IGHA1 is a crucial c…	DEP
SYNPO2	Can you tell me the function of the protein "SYNPO2" (Synaptopodin-2) of human?	The protein SYNPO2 (Synaptopodin-2) plays a crucial role in maintaining the structure and function of the kidney glomerulus, which is responsible for filtering blood and maintaining fluid balance in the body. SYNPO2 is specifically expressed in the podocytes, the specialized cells in the glomerulus that are responsible for regulating the filtration process. SYNPO2 helps to anchor the podocyte foo…	DEP
CFHR1	Can you tell me the function of the protein "CFHR1" (Complement factor H-related protein 1) of human?	The CFHR1 protein is a member of the complement factor H-related protein family that is involved in the regulation of the alternative pathway of the complement system. CFHR1 competes with complement factor H (CFH) in binding to C3b, a key component of the complement system, to regulate complement activation and prevent excessive inflammation and tissue destruction. Dysfunction of CFHR1 has been a…	DEP
FCGRT	Can you tell me the function of the protein "FCGRT" (IgG receptor FcRn large subunit p51) of human?	The protein FCGRT, also known as IgG receptor FcRn large subunit p51, functions as a neonatal Fc receptor that helps to maintain the half-life and transport of IgG antibodies in the body. FCGRT binds to IgG antibodies and protects them from degradation in the acidic environment of the endosome, allowing them to be recycled and reused. This protein plays a crucial role in the immune system by ensu…	DEP
IGHV3-9	Can you tell me the function of the protein "IGHV3-9" (Immunoglobulin heavy variable 3-9) of human?	The protein "IGHV3-9" is a component of the immunoglobulin heavy chain, which, along with the light chain, forms the structure of antibodies in humans. The specific function of "IGHV3-9" is to contribute to the variable region of the heavy chain, which plays a crucial role in determining the specificity of the antibody's antigen-binding site. In other words, "IGHV3-9" is involved in recognizing a…	DEP
MCM4	Can you tell me the function of the protein "MCM4" (DNA replication licensing factor MCM4) of human?	The protein MCM4, also called DNA replication licensing factor MCM4, is a component of the mini-chromosome maintenance (MCM) protein complex, which is involved in DNA replication. MCM4 helps to initiate DNA replication by unwinding the double helix structure of DNA at the replication initiation site. It is essential for the accurate and timely duplication of the genome during cell division. Mutat…	DEP
DNAJB11	Can you tell me the function of the protein "DNAJB11" (DnaJ homolog subfamily B member 11) of human?	DNAJB11 (DnaJ homolog subfamily B member 11) is a type of molecular chaperone that assists in the folding, assembly, and disassembly of protein complexes. It plays an important role in regulating the activity of the tumor suppressor protein p53, which is involved in preventing the development of cancer. Additionally, DNAJB11 has been shown to play a role in autophagy, the process by which cells b…	DEP
DCUN1D2	Can you tell me the function of the protein "DCUN1D2" (DCN1-like protein 2) of human?	DCUN1D2 is a protein involved in the regulation of protein degradation through the assembly and activation of cullin-RING E3 ligases. Specifically, it functions as an adaptor protein required for the neddylation of cullins, which is necessary for their activation and subsequent recruitment of specific substrate proteins for degradation. Neddylation is a post-translational modification process tha…	DEP
DCUN1D1	Can you tell me the function of the protein "DCUN1D1" (DCN1-like protein 1) of human?	The protein DCUN1D1 (DCN1-like protein 1) of human is involved in the process of protein ubiquitination, specifically in the regulation of the activity and stability of the cullin-RING E3 ubiquitin ligase (CRL) complex. It is believed to aid in the binding of NEDD8, a ubiquitin-like molecule, to the cullin protein, which is necessary for the proper function of CRL. DCUN1D1 is also thought to play…	DEP
TXLNA	Can you tell me the function of the protein "TXLNA" (Alpha-taxilin) of human?	TXLNA (Alpha-taxilin) is a protein found in humans that is involved in cellular processes such as cell motility, vesicle trafficking, and organelle positioning. It is primarily located in the cytoplasm and interacts with other proteins such as myosin, actin, and syntaxin. TXLNA is thought to play a role in maintaining the structure and function of the cytoskeleton, particularly in the transport a…	DEP
GMPS	Can you tell me the function of the protein "GMPS" (GMP synthase [glutamine-hydrolyzing]) of human?	The protein GMPS, also known as GMP synthase [glutamine-hydrolyzing], is responsible for catalyzing the final step in the synthesis of guanosine monophosphate (GMP), which is a nucleotide that plays a critical role in DNA and RNA synthesis as well as in energy metabolism. Specifically, GMPS is involved in converting xanthosine monophosphate (XMP) to GMP by adding an amino group from glutamine to …	DEP
PURA	Can you tell me the function of the protein "PURA" (Transcriptional activator protein Pur-alpha) of human?	The protein PURA, also known as transcriptional activator protein Pur-alpha, plays multiple roles in the regulation of gene expression, DNA replication, and DNA repair. It binds to single-stranded DNA and RNA, and functions as a transcriptional activator of some genes and a repressor of others. It also interacts with other proteins to form complexes that help maintain the structure and integrity …	DEP
ADD1	Can you tell me the function of the protein "ADD1" (Alpha-adducin) of human?	The protein ADD1 (Alpha-adducin) is responsible for regulating cell structure and function. It promotes the assembly and organization of actin filaments, which are essential components of the cell cytoskeleton. Additionally, ADD1 is involved in blood pressure regulation, as it interacts with proteins that control the movement of sodium and potassium ions across cell membranes in the kidneys and b…	DEP
ATRN	Can you tell me the function of the protein "ATRN" (Attractin) of human?	The protein ATRN (Attractin) of human has been found to play an important role in the immune response. It is involved in regulating the activity of T cells, which are key players in the immune system. ATRN also plays a role in the development and maintenance of multiple organs, including the brain, heart and kidneys. Additionally, it has been suggested that ATRN may be involved in the regulation …	DEP
CNRIP1	Can you tell me the function of the protein "CNRIP1" (CB1 cannabinoid receptor-interacting protein 1) of human?	The CB1 cannabinoid receptor-interacting protein 1 (CNRIP1) of humans is primarily involved in interacting with the CB1 cannabinoid receptor in the brain and nervous system. This protein helps regulate the cannabinoid signaling pathway, which is involved in various physiological processes like pain perception, cognition, and appetite regulation. CNRIP1 also plays a crucial role in intracellular t…	DEP
CAV2	Can you tell me the function of the protein "CAV2" (Caveolin-2) of human?	The protein CAV2, also known as Caveolin-2, is a critical structural protein that functions as a scaffold within the caveolae membranes of cells. It is involved in various cellular processes, including signal transduction, vesicular transport, endocytosis, and lipid metabolism. CAV2 interacts with several signaling molecules, such as G proteins, receptor tyrosine kinases, and integrins, to modula…	DEP
C1S	Can you tell me the function of the protein "C1S" (Complement C1s subcomponent) of human?	The protein C1S (Complement C1s subcomponent) is a serine protease component of the complement cascade. It plays a crucial role in the activation of the complement system, which is part of the body's immune defense against pathogens. Specifically, C1S cleaves and activates C4 and C2 components of the complement system, leading to the formation of C3 convertase and ultimately the destruction of fo…	DEP
F9	Can you tell me the function of the protein "F9" (Coagulation factor IX) of human?	The protein F9 (Coagulation factor IX) is a clotting factor that is essential for blood clotting. It is involved in the formation of the tenase complex, which activates the conversion of prothrombin to thrombin in the coagulation cascade. A deficiency in F9 results in hemophilia B, a bleeding disorder characterized by a deficiency in clotting factor IX activity.	DEP
SORBS2	Can you tell me the function of the protein "SORBS2" (Sorbin and SH3 domain-containing protein 2) of human?	The protein SORBS2 is believed to play a role in several cellular processes, including cell adhesion, migration, cytoskeleton organization, and signal transduction. It interacts with other proteins such as actin, integrins, and signaling molecules, and has been shown to modulate cell adhesion and migration in certain cell types. SORBS2 also shows potential as a tumor suppressor gene and has been …	DEP
SPON1	Can you tell me the function of the protein "SPON1" (Spondin-1) of human?	The function of the protein SPON1 (Spondin-1) of humans is to promote neuronal differentiation and survival during development. It also plays a role in the formation and maintenance of synapses in the central nervous system. Additionally, SPON1 has been implicated in inhibiting angiogenesis and tumor growth.	DEP
IGHV1-18	Can you tell me the function of the protein "IGHV1-18" (Immunoglobulin heavy variable 1-18) of human?	The protein "IGHV1-18" is a component of Immunoglobulin heavy chain, which is a protein found on B cells that plays a role in the body's immune system. The specific function of IGHV1-18 is to help recognize and bind to antigens, which are substances that the body identifies as foreign or harmful, and trigger an immune response to protect the body against infection or disease. As a variable region…	DEP
F10	Can you tell me the function of the protein "F10" (Coagulation factor X) of human?	Coagulation factor X, also known as F10, is a protein that plays a crucial role in the blood coagulation process known as the intrinsic pathway. Factor X is activated into factor Xa by either the intrinsic pathway or the extrinsic pathway. When activated, factor Xa serves as a crucial component of the prothrombinase complex, which ultimately leads to the conversion of prothrombin to thrombin. Thr…	DEP
MFAP5	Can you tell me the function of the protein "MFAP5" (Microfibrillar-associated protein 5) of human?	The protein MFAP5 (Microfibrillar-associated protein 5) is known to play a role in regulating the elasticity and integrity of extracellular matrix microfibrils. It is involved in the assembly and stabilization of microfibers, which provide support and structure to various tissues in the body, including the skin, lungs, and tendons. MFAP5 is also thought to contribute to the regulation of cell pro…	DEP
CPA3	Can you tell me the function of the protein "CPA3" (Mast cell carboxypeptidase A) of human?	The Mast cell carboxypeptidase A (CPA3) protein is an enzyme that is primarily expressed in mast cells, which are involved in the immune system's response to allergens and parasites. The function of CPA3 is to cleave the carboxyl-terminal amino acid residues from other proteins, which can modify the biological activity of those proteins. CPA3 may play a role in regulating inflammation, wound heal…	DEP
SLMAP	Can you tell me the function of the protein "SLMAP" (Sarcolemmal membrane-associated protein) of human?	The Sarcolemmal membrane-associated protein (SLMAP) is a protein that is localized to the sarcoplasmic reticulum (SR) and sarcolemma of muscle cells, where it functions as a regulator of calcium homeostasis. It acts as a regulator of muscle growth and differentiation, as well as a regulator of muscle contraction and relaxation. SLMAP is also involved in vesicular trafficking and endocytosis in no…	DEP
HABP2	Can you tell me the function of the protein "HABP2" (Hyaluronan-binding protein 2) of human?	Yes, HABP2 (Hyaluronan-binding protein 2) is a protein in humans that has various functions, including	DEP
APOA2	Can you tell me the function of the protein "APOA2" (Apolipoprotein A-II) of human?	The main function of Apolipoprotein A-II (APOA2) is to control the levels of lipids (fats) in the blood, particularly high-density lipoprotein (HDL) cholesterol, also known as "good" cholesterol. It is a component of HDL particles and helps to transport and remove excess cholesterol from the body. APOA2 also plays a role in immune function and inflammation. Mutations in the APOA2 gene are associa…	DEP
CRYL1	Can you tell me the function of the protein "CRYL1" (Lambda-crystallin homolog) of human?	The protein CRYL1 (Lambda-crystallin homolog) of human is primarily involved in the regulation of metabolism and cellular respiration in various tissues and organs. It acts as a NAD(P)H	DEP
PRKCA	Can you tell me the function of the protein "PRKCA" (Protein kinase C alpha type) of human?	The protein "PRKCA" (Protein kinase C alpha type) is a member of the protein kinase C family, which plays a critical role in various cellular processes, including signal transduction, gene expression, and cell metabolism. It functions by phosphorylating specific target proteins in response to various signals, such as hormones, growth factors, and neurotransmitters. PRKCA also regulates various ce…	DEP
SNU13	Can you tell me the function of the protein "SNU13" (NHP2-like protein 1) of human?	The protein SNU13 (also known as NHP2-like protein 1) is a ubiquitous nucleolar protein that plays a crucial role in ribosome biogenesis, a process that is essential for protein synthesis in all living cells. SNU13 serves as a core component of the small ribonucleoprotein (sRNP) complex that is involved in the modification and maturation of the precursor ribosomal RNA (pre-rRNA) molecules. Specif…	DEP
IGKV3D-20	Can you tell me the function of the protein "IGKV3D-20" (Immunoglobulin kappa variable 3D-20) of human?	As an AI language model, I do not have access to the latest scientific research related to protein IgKV3D-20. However, from my understanding, immunoglobulins are proteins that play a crucial role in the human immune system. They are produced by B cells and recognize and bind to specific foreign substances called antigens, leading to their destruction or removal from the body. IgKV3D-20 is a membe…	DEP
IGKV3-20	Can you tell me the function of the protein "IGKV3-20" (Immunoglobulin kappa variable 3-20) of human?	The protein IGKV3-20 (Immunoglobulin kappa variable 3-20) is a variable region of the light chain of immunoglobulin (antibody) molecules. It is a component of the human immune system that recognizes and neutralizes foreign substances such as viruses and bacteria. The specific function of IGKV3-20 is to bind to a specific antigen, triggering an immune response to eliminate the invading pathogen.	DEP
IGLC7	Can you tell me the function of the protein "IGLC7" (Immunoglobulin lambda constant 7) of human?	The protein IGLC7 is a component of the immunoglobulin complex, specifically the immunoglobulin lambda (Igλ) light chain. It is involved in the recognition and binding of antigens, which is a critical step in the immune response. The Igλ proteins are also important for determining the specificity and diversity of the antibody response. Overall, IGLC7 plays a crucial role in the function of the hu…	DEP
ADAR	Can you tell me the function of the protein "ADAR" (Double-stranded RNA-specific adenosine deaminase) of human?	The function of ADAR (Double-stranded RNA-specific adenosine deaminase) protein in humans is to catalyze the conversion of adenosine (A) to inosine (I) in double-stranded RNA (dsRNA). This process is known as RNA editing and it alters the nucleotide sequence of RNA molecules, which affects the mRNA translation, gene expression, and protein function. ADAR protein also plays a crucial role in sever…	DEP
DNAJA1	Can you tell me the function of the protein "DNAJA1" (DnaJ homolog subfamily A member 1) of human?	DNAJA1 is a molecular chaperone protein that plays a role in protein folding and quality control. Specifically, it is involved in the ATP-dependent binding and release of polypeptides to prevent their misfolding and aggregation. DNAJA1 is also involved in the regulation of cellular stress responses, such as the heat shock response, and has been implicated in various diseases, including cancer and…	DEP
ESD	Can you tell me the function of the protein "ESD" (S-formylglutathione hydrolase) of human?	The protein ESD is also known as S-formylglutathione hydrolase. Its function is to catalyze the hydrolysis of S-formylglutathione, which is a metabolite of formaldehyde and is involved in the detoxification of this toxic substance. ESD is mainly expressed in the liver, and its activity is important for the maintenance of cellular redox homeostasis and the protection of liver cells against oxidati…	DEP
IGHV1-3	Can you tell me the function of the protein "IGHV1-3" (Immunoglobulin heavy variable 1-3) of human?	The protein IGHV1-3 is a specific type of immunoglobulin heavy variable protein, which is a component of antibodies produced by the immune system in response to pathogens or foreign substances. The function of IGHV1-3 is to provide structural diversity to the antibody molecule, allowing it to recognize and bind to a wide range of antigens. It is involved in the immune response to infectious disea…	DEP
KANK2	Can you tell me the function of the protein "KANK2" (KN motif and ankyrin repeat domain-containing protein 2) of human?	KANK2 (KN motif and ankyrin repeat domain-containing protein 2) is a protein found in humans, which is involved in various biological processes. It is primarily expressed in tissues such as the brain, heart, and skeletal muscles.The function of KANK2 is not fully understood, but studies suggest that it plays a role in many cellular processes, including actin cytoskeleton organization, cell adhesi…	DEP
SORBS1	Can you tell me the function of the protein "SORBS1" (Sorbin and SH3 domain-containing protein 1) of human?	SORBS1 is a protein that plays a role in regulating the organization of the cytoskeleton and cell adhesion, which are important for maintaining cell shape and motility. It also acts as a scaffold protein, bringing together other signaling molecules and regulating their activity. SORBS1 has been implicated in a variety of cellular processes, including cell migration, differentiation, and prolifera…	DEP
IGLV7-46	Can you tell me the function of the protein "IGLV7-46" (Immunoglobulin lambda variable 7-46) of human?	Sorry, as an AI language model, I do not have access to the most up-to-date research on the specific functions of proteins like IGLV7-46. It is important to note that proteins can have various functions depending on their context and interactions with other molecules in the body. This protein is a member of the immunoglobulin superfamily and is involved in the function of the immune system as a c…	DEP
MYLK	Can you tell me the function of the protein "MYLK" (Myosin light chain kinase, smooth muscle) of human?	The function of the protein MYLK (Myosin light chain kinase, smooth muscle) of humans is to regulate the interaction between myosin and actin in smooth muscle cells, leading to contraction of smooth muscles. MYLK phosphorylates myosin light chains, activating the interaction between myosin and actin, resulting in the contraction of smooth muscle cells. MYLK plays an essential role in various phys…	DEP
SF3B6	Can you tell me the function of the protein "SF3B6" (Splicing factor 3B subunit 6) of human?	The SF3B6 protein, also known as splicing factor 3B subunit 6, is a component of the splicing factor SF3B complex that is involved in pre-mRNA splicing. Specifically, SF3B6 plays a role in the recognition of the 3' splice site during spliceosome assembly, which is necessary for the removal of introns from pre-mRNA molecules. Mutations in SF3B6 have been associated with various diseases, including…	DEP
SRPRB	Can you tell me the function of the protein "SRPRB" (Signal recognition particle receptor subunit beta) of human?	The protein SRPRB is a subunit of the signal recognition particle (SRP) receptor, which is involved in protein targeting and transport within cells. SRP initiates the targeting of secretory and membrane proteins to the endoplasmic reticulum (ER) by recognizing and binding to their signal sequences. SRPRB is specifically responsible for binding the SRP and initiating the transfer of the protein to…	DEP
ITIH2	Can you tell me the function of the protein "ITIH2" (Inter-alpha-trypsin inhibitor heavy chain H2) of human?	ITIH2 (Inter-alpha-trypsin inhibitor heavy chain H2) is a protein that belongs to the inter-alpha-trypsin inhibitor (ITI) family. It is involved in several biological processes, including inflammation, coagulation, and wound healing. Recent studies have shown that ITIH2 plays a crucial role in cancer development and progression.ITIH2 is one of the heavy chains of the ITI family, which consists of…	DEP
ITSN1	Can you tell me the function of the protein "ITSN1" (Intersectin-1) of human?	Intersectin-1 (ITSN1) is a protein that plays a role in the regulation of clathrin-mediated endocytosis, which is the process by which cells internalize extracellular molecules such as nutrients, signaling molecules, pathogens, and other proteins. ITSN1 interacts with the proteins involved in endocytosis, including clathrin, dynamin, and epsin, and helps to coordinate their activities to facilita…	DEP
CYB5R3	Can you tell me the function of the protein "CYB5R3" (NADH-cytochrome b5 reductase 3) of human?	The protein CYB5R3 (NADH-cytochrome b5 reductase 3) of humans is involved in the metabolism of drugs and other xenobiotics, as well as in the biosynthesis of steroids and fatty acids. It acts as an electron donor to cytochrome P450 enzymes, which are essential for the metabolism of a wide range of substances including drugs, toxins, and endogenous compounds. CYB5R3 is also important for the regul…	DEP
CD248	Can you tell me the function of the protein "CD248" (Endosialin) of human?	The protein CD248, also known as Endosialin, plays a role in angiogenesis (the formation of new blood vessels) and tumor growth. It is expressed on the surface of certain cells, including endothelial cells (the cells that line blood vessels), pericytes (supporting cells around blood vessels), and certain cancer cells. CD248 has been shown to be involved in promoting the growth and migration of th…	DEP
CPN1	Can you tell me the function of the protein "CPN1" (Carboxypeptidase N catalytic chain) of human?	The function of the protein CPN1 is to act as a carboxypeptidase (enzymes that catalyze the removal of amino acids from the carboxy-terminus of peptides and proteins) in the bloodstream, helping to regulate blood pressure by cleaving carboxy-terminal arginine or lysine residues from biologically active peptides such as bradykinin and anaphylatoxins.	DEP
ADH1B	Can you tell me the function of the protein "ADH1B" (All-trans-retinol dehydrogenase [NAD(+)] ADH1B) of human?	The protein ADH1B (All-trans-retinol dehydrogenase [NAD(+)] ADH1B) of human functions as an alcohol dehydrogenase that helps in the metabolism of ethanol in the liver. It converts ethanol to acetaldehyde, which is further processed to acetate and then excreted from the body. The ADH1B gene variant is also associated with differences in alcohol metabolism and tolerance among populations. Additiona…	DEP
CISD2	Can you tell me the function of the protein "CISD2" (CDGSH iron-sulfur domain-containing protein 2) of human?	The protein CISD2 (CDGSH iron-sulfur domain-containing protein 2) is believed to play a role in mitochondrial iron homeostasis and regulation of reactive oxygen species (ROS) production. It is also implicated in the regulation of autophagy, insulin secretion, and glucose-stimulated insulin secretion. Additionally, mutations in the CISD2 gene have been associated with Wolfram-like syndrome, a rare…	DEP
RBBP7	Can you tell me the function of the protein "RBBP7" (Histone-binding protein RBBP7) of human?	The protein RBBP7 (also known as Retinoblastoma-binding protein 7 or Histone-binding protein RBBP7) plays a crucial role in gene regulation and chromatin remodeling. It is a key component of several different protein complexes, including the chromatin-remodeling SWI/SNF complex, the histone deacetylase (HDAC) complex, and the E2F-Rb pathway.In particular, RBBP7 is involved in regulating gene expr…	DEP
LUC7L2	Can you tell me the function of the protein "LUC7L2" (Putative RNA-binding protein Luc7-like 2) of human?	The protein LUC7L2 is a Putative RNA-binding protein that plays a role in mRNA splicing, the process by which introns (non-coding sequences) are removed from pre-mRNA to produce mature mRNA transcripts. LUC7L2 is specifically involved in the regulation of alternative splicing, influencing which exons are included or excluded from the final mRNA transcript. Mutations in the LUC7L2 gene have been a…	DEP
PLEKHA5	Can you tell me the function of the protein "PLEKHA5" (Pleckstrin homology domain-containing family A member 5) of human?	PLEKHA5 (Pleckstrin homology domain-containing family A member 5) is a protein in humans that plays a key role in regulating cell adhesion and migration by interacting with various signaling molecules. It contains a pleckstrin homology domain, which binds to phospholipids and helps to target the protein to the plasma membrane. PLEKHA5 also interacts with other proteins, such as integrins and grow…	DEP
COL21A1	Can you tell me the function of the protein "COL21A1" (Collagen alpha-1(XXI) chain) of human?	The protein COL21A1 (Collagen alpha-1(XXI) chain) is involved in the formation of collagen fibrils, which provide structural support to various tissues and organs, including skin, bone, and cartilage. Specifically, COL21A1 is thought to play a role in the development and maintenance of skeletal muscles, as well as in the regulation of neuronal function. Defects in this protein have been linked to…	DEP
SORBS3	Can you tell me the function of the protein "SORBS3" (Vinexin) of human?	SORBS3 (Vinexin) is a cytoplasmic protein that plays a role in regulating cell adhesion, migration, and signaling pathways. Specifically, it is involved in the organization and maintenance of intercellular contacts, the formation of focal adhesions, and the activation of signaling molecules such as Rho GTPases and protein kinases. It has also been shown to function as a tumor suppressor in certai…	DEP
ACTG1	Can you tell me the function of the protein "ACTG1" (Actin, cytoplasmic 2) of human?	The primary function of the protein ACTG1 (actin, cytoplasmic 2) in humans is to provide structural support to cells and enable movement. It is a major component of the cellular cytoskeleton and plays a crucial role in cell motility, including muscle contraction, cell division, and the formation of cell protrusions such as filopodia and lamellipodia. It interacts with a variety of other proteins,…	DEP
MTR	Can you tell me the function of the protein "MTR" (Methionine synthase) of human?	Yes, Methionine synthase (MTR) is an enzyme that plays a crucial role in the conversion of homocysteine to methionine, which is an essential amino acid for humans. Methionine is required for many important biological processes, including protein synthesis, DNA methylation, and the production of the antioxidant glutathione. Methionine synthase also requires vitamin B12 as a cofactor for its functi…	DEP
EPB41L3	Can you tell me the function of the protein "EPB41L3" (Band 4.1-like protein 3) of human?	The EPB41L3 (Band 4.1-like protein 3) is a membrane-associated protein that is involved in the organization and maintenance of the cytoskeleton. It plays a crucial role in regulating cell adhesion, motility, and polarity by linking the actin cytoskeleton to the plasma membrane. EPB41L3 is also involved in the development of neuronal and epithelial tissues, and its dysregulation has been associate…	DEP
SYNE3	Can you tell me the function of the protein "SYNE3" (Nesprin-3) of human?	The protein SYNE3 (Nesprin-3) is known to be involved in anchoring the nucleus to the cytoskeleton in cells. It is a member of the Nesprin family of proteins that aid in the positioning and movement of the nucleus within cells. SYNE3 has also been shown to play a role in muscle development and function, as well as in the maintenance of the skin barrier through its involvement in the formation and…	DEP
QSOX1	Can you tell me the function of the protein "QSOX1" (Sulfhydryl oxidase 1) of human?	The protein QSOX1 (Sulfhydryl oxidase 1) plays a role in the formation of disulfide bonds within proteins. Disulfide bonds contribute to the structural stability and functional activity of many proteins, including enzymes, hormones, and antibodies. QSOX1 is also involved in the regulation of redox signaling and may influence the progression of certain types of cancer.	DEP
NEXN	Can you tell me the function of the protein "NEXN" (Nexilin) of human?	NEXN (Nexilin) is believed to play a role in the organization of the actin cytoskeleton, which is responsible for maintaining the shape of cells and facilitating movement. Specifically, NEXN appears to regulate actin dynamics and the assembly of actin structures in muscle cells, including those in the heart. Mutations in the NEXN gene have been associated with dilated cardiomyopathy, a condition …	DEP
FABP3	Can you tell me the function of the protein "FABP3" (Fatty acid-binding protein, heart) of human?	The function of FABP3 is to bind and transport fatty acids in cardiac muscles. It serves as a facilitator of fatty acid uptake and metabolism in the heart, allowing it to generate energy to meet the high energy demands of this muscle type. FABP3 is also involved in lipid signaling and regulation of gene expression in the heart. Dysregulation of FABP3 has been implicated in various cardiovascular …	DEP
PON1	Can you tell me the function of the protein "PON1" (Serum paraoxonase/arylesterase 1) of human?	The function of the protein PON1 is to act as an antioxidant and to protect against the oxidation of lipoproteins, which are important for cardiovascular health. Specifically, PON1 is an esterase that can hydrolyze and detoxify a variety of organophosphate compounds, such as pesticides and nerve agents. This activity is believed to be important for the innate immune system and the detoxification …	DEP
TAPBP	Can you tell me the function of the protein "TAPBP" (Tapasin) of human?	TAPBP (Tapasin) is a protein that plays a crucial role in the major histocompatibility complex (MHC) class I antigen presentation pathway. It serves as an essential chaperone protein for the transporters associated with antigen processing (TAP), which are responsible for transferring peptides from the cytosol to the endoplasmic reticulum (ER) for loading onto MHC class I molecules. TAPBP helps to…	DEP
EIF2S1	Can you tell me the function of the protein "EIF2S1" (Eukaryotic translation initiation factor 2 subunit 1) of human?	EIF2S1 is a subunit of the eukaryotic initiation factor 2 (EIF2) complex, which plays a crucial role in protein synthesis or translation. EIF2S1 regulates the initiation of protein synthesis by binding to GTP and helping to recruit the initiator methionine-tRNA to the ribosome. It is involved in the regulation of translation initiation in response to various cellular stresses, including nutrient …	DEP
QDPR	Can you tell me the function of the protein "QDPR" (Dihydropteridine reductase) of human?	The protein QDPR (Dihydropteridine reductase) of human is an enzyme that plays a critical role in the biosynthesis of tetrahydrobiopterin (BH4), a co-factor of enzymes involved in neurotransmitter synthesis and nitric oxide production. It catalyzes the conversion of dihydrobiopterin (BH2) to BH4, a process that is essential for the production of neurotransmitters such as dopamine, serotonin, and …	DEP
ATP2C1	Can you tell me the function of the protein "ATP2C1" (Calcium-transporting ATPase type 2C member 1) of human?	The protein ATP2C1 (Calcium-transporting ATPase type 2C member 1) is a transmembrane protein that is found in the plasma membrane and in the membranes of intracellular organelles. Its primary function is to pump calcium ions across the plasma membrane and into the Golgi apparatus, where they are involved in protein modification and sorting. ATP2C1 is also involved in the regulation of calcium lev…	DEP
LTBP4	Can you tell me the function of the protein "LTBP4" (Latent-transforming growth factor beta-binding protein 4) of human?	LTBP4 is a protein that binds to and regulates the activity of a family of proteins called transforming growth factor-beta (TGF-beta), which are involved in processes such as cell growth and differentiation, immune function, and wound healing. Specifically, LTBP4 helps to control the activation and release of TGF-beta from its latent form, meaning it is not yet active and needs to be activated by…	DEP
MCAM	Can you tell me the function of the protein "MCAM" (Cell surface glycoprotein MUC18) of human?	The protein MCAM, also known as Cell surface glycoprotein MUC18, plays a role in various biological processes, such as cell adhesion, migration, and invasion. It is a transmembrane protein that belongs to the immunoglobulin superfamily and is expressed in various tissues, including endothelial cells, melanocytes, and leukocytes. MCAM is involved in inflammation and angiogenesis and is implicated …	DEP
PLSCR3	Can you tell me the function of the protein "PLSCR3" (Phospholipid scramblase 3) of human?	The exact function of PLSCR3 protein is not fully understood yet, but it is known to be involved in the regulation of various cellular processes, including apoptosis (programmed cell death), lipid metabolism, inflammation, and immune response. PLSCR3 promotes the translocation of phospholipids between cell membranes, which may be important for cell signaling and membrane repair. Some studies also…	DEP
MAOB	Can you tell me the function of the protein "MAOB" (Amine oxidase [flavin-containing] B) of human?	The protein MAOB is responsible for catalyzing the oxidation of biogenic and xenobiotic amines, including dopamine and serotonin, in the central nervous system. It is primarily found in the outer membrane of mitochondria in neurons and astrocytes. Dysfunction of MAOB has been implicated in a variety of neurological disorders, including Parkinson's disease and depression.	DEP
PCOLCE	Can you tell me the function of the protein "PCOLCE" (Procollagen C-endopeptidase enhancer 1) of human?	The protein PCOLCE, also known as Procollagen C-endopeptidase enhancer 1, is involved in the formation of collagen, which is a key component of connective tissues in humans. Specifically, PCOLCE enhances the activity of an enzyme that is responsible for processing collagen during its biosynthesis. In addition, it also plays a role in regulating the activity of enzymes involved in collagen degrada…	DEP
LANCL1	Can you tell me the function of the protein "LANCL1" (Glutathione S-transferase LANCL1) of human?	The function of the protein LANCL1 (Glutathione S-transferase LANCL1) of human is not completely understood, but it is believed to have a role in the cellular response to oxidative stress and in the regulation of energy metabolism. It has also been suggested to play a role in the development and progression of cancer.	DEP
ME3	Can you tell me the function of the protein "ME3" (NADP-dependent malic enzyme, mitochondrial) of human?	The protein "ME3" is an enzyme called NADP-dependent malic enzyme, which is located in the mitochondria of human cells. Its main function is to play a critical role in energy metabolism by catalyzing the conversion of malate to pyruvate, which can then be used for energy production through the process of cellular respiration. Additionally, ME3 is involved in certain biosynthetic pathways, such as…	DEP
MCM5	Can you tell me the function of the protein "MCM5" (DNA replication licensing factor MCM5) of human?	The protein MCM5 (DNA replication licensing factor MCM5) of human is a component of the MCM complex (minichromosome maintenance complex) that plays a crucial role in DNA replication. MCM5 functions as a DNA helicase, which unwinds the DNA double helix to allow replication to occur. It is essential for the initial licensing of DNA replication origins and the subsequent initiation of DNA synthesis.…	DEP
CACYBP	Can you tell me the function of the protein "CACYBP" (Calcyclin-binding protein) of human?	CACYBP (Calcyclin-binding protein) is a multifunctional protein that plays a role in various cellular processes, including protein degradation, RNA processing, and cell migration. It acts as a component of the E3 ubiquitin-protein ligase complex, facilitating the ubiquitination and subsequent degradation of target proteins. Additionally, CACYBP interacts with and regulates the activity of various…	DEP
CDH13	Can you tell me the function of the protein "CDH13" (Cadherin-13) of human?	The protein CDH13 (cadherin-13) functions as a cell adhesion molecule, which is involved in the formation and maintenance of intercellular junctions between cells, particularly in the central nervous system. It is also believed to play a role in regulating cell growth, differentiation, and migration, as well as synaptic plasticity and neurotransmission. CDH13 has been implicated in various diseas…	DEP
HP	Can you tell me the function of the protein "HP" (Haptoglobin) of human?	Haptoglobin (HP) is a protein in the blood that binds to free hemoglobin released from damaged red blood cells to prevent its harmful effects on tissues and organs. The HP-hemoglobin complex is then taken up by cells in the liver and spleen where it is broken down and the iron and amino acids are recycled. HP also plays a role in modulating inflammation and immune response.	DEP
KCTD16	Can you tell me the function of the protein "KCTD16" (BTB/POZ domain-containing protein KCTD16) of human?	The exact function of KCTD16 is not yet fully understood, as it has been relatively unstudied. However, some studies suggest that it plays a role in cell proliferation, differentiation and apoptosis, and may also be involved in the regulation of neuronal development and synaptic transmission. It has also been linked to certain diseases such as cancer, neurodegenerative disorders, and epilepsy, th…	DEP
KCTD8	Can you tell me the function of the protein "KCTD8" (BTB/POZ domain-containing protein KCTD8) of human?	The protein KCTD8 is involved in various cellular processes such as cell cycle regulation, protein modification and degradation. It acts as a substrate-specific adapter of E3 ubiquitin-protein ligase complexes and is involved in the degradation of several proteins, including CUL3, STRA8, and HNF1A. Additionally, KCTD8 is known to interact with several signaling proteins, modulating their activity…	DEP
KCTD12	Can you tell me the function of the protein "KCTD12" (BTB/POZ domain-containing protein KCTD12) of human?	The BTB/POZ domain-containing protein KCTD12 of human is thought to be involved in the regulation of ion channels or ion transport. It may also play a role in neuronal development and synaptic plasticity. Additionally, KCTD12 has been implicated in the regulation of cell proliferation and apoptosis. Further research is needed to fully understand the function of this protein.	DEP
SERPINA5	Can you tell me the function of the protein "SERPINA5" (Plasma serine protease inhibitor) of human?	The protein SERPINA5, also known as protein C inhibitor, is a plasma serine protease inhibitor that serves several functions in humans. Its main function is to inhibit the activity of various proteases in the blood, including thrombin, plasmin, and activated protein C, which are involved in the regulation of blood clotting and fibrinolysis. SERPINA5 also plays a role in modulating inflammation an…	DEP
SGCD	Can you tell me the function of the protein "SGCD" (Delta-sarcoglycan) of human?	The protein SGCD (Delta-sarcoglycan) is a component of the dystrophin-glycoprotein complex, which plays a critical role in the proper function and maintenance of muscle fibers. It specifically helps to anchor the complex to the muscle membrane and helps to maintain the structural integrity of muscle fibers. Mutations in the SGCD gene have been linked to muscular dystrophy and other neuromuscular …	DEP
CMA1	Can you tell me the function of the protein "CMA1" (Chymase) of human?	The protein CMA1, also known as Chymase, is a serine protease primarily produced by mast cells. Its function is to cleave and activate a variety of substrates, including extracellular matrix proteins, cytokines, and chemokines, which play vital roles in tissue remodeling, inflammation, and immune response. Moreover, CMA1 has been associated with several pathological conditions, such as asthma, ca…	DEP
TOP1	Can you tell me the function of the protein "TOP1" (DNA topoisomerase 1) of human?	The protein TOP1 (DNA topoisomerase 1) is an enzyme that plays a crucial role in DNA replication and transcription processes. TOP1 functions by cutting the phosphodiester backbone of DNA, allowing the double helix to unwind and relieve torsional stress. This enables the DNA to be efficiently replicated, transcribed and repaired. Additionally, TOP1 is also involved in other cellular processes such…	DEP
TOP1MT	Can you tell me the function of the protein "TOP1MT" (DNA topoisomerase I, mitochondrial) of human?	The function of the protein TOP1MT (DNA topoisomerase I, mitochondrial) in humans is to regulate the topology of mitochondrial DNA (mtDNA) by relaxing the supercoiling generated during replication and transcription. It is also involved in the repair of DNA damage caused by reactive oxygen species (ROS) produced by mitochondrial respiration. Dysfunction of TOP1MT has been linked to various human d…	DEP
GNAL	Can you tell me the function of the protein "GNAL" (Guanine nucleotide-binding protein G(olf) subunit alpha) of human?	Yes, the protein GNAL is involved in the signaling pathways of the nervous system. It belongs to the G protein family, which modulates different signaling pathways by mediating the exchange of guanosine diphosphate (GDP) to guanosine triphosphate (GTP) and activation of downstream effectors. Specifically, GNAL is the alpha subunit of the G(olf) protein that plays a crucial role in the regulation …	DEP
GNAS	Can you tell me the function of the protein "GNAS" (Guanine nucleotide-binding protein G(s) subunit alpha isoforms short) of human?	The protein GNAS plays a role as a signal transducer in the regulation of adenylate cyclase activity. It is involved in various cellular signaling pathways, particularly those that are mediated by G protein-coupled receptors. GNAS also plays a critical role in the development and maintenance of bone and may have a role in glucose and energy metabolism. Additionally, mutations in GNAS have been as…	DEP
GNAS	Can you tell me the function of the protein "GNAS" (Guanine nucleotide-binding protein G(s) subunit alpha isoforms XLas) of human?	The protein GNAS (Guanine nucleotide-binding protein G(s) subunit alpha isoforms XLas) of human is responsible for regulating the production of cyclic adenosine monophosphate (cAMP) within cells. It acts as a signal transducer in the intracellular signaling pathways mediated by G protein-coupled receptors, which are involved in a wide range of physiological processes such as hormone signaling, ce…	DEP
INA	Can you tell me the function of the protein "INA" (Alpha-internexin) of human?	INA (Alpha-internexin) is a type IV intermediate filament protein that is expressed primarily in developing and mature neurons of the central and peripheral nervous systems. It plays an important role in maintaining the structural integrity of neuronal cells and supporting axonal growth during nervous system development. INA is also involved in the regulation of synaptic plasticity and neurotrans…	DEP
PODN	Can you tell me the function of the protein "PODN" (Podocan) of human?	PODN (Podocan) is a protein that is primarily found in the extracellular matrix (ECM) of various tissues, including cartilage, skeletal muscle, and heart valves. It is also expressed in the kidney, particularly in cells called podocytes that play a crucial role in maintaining the filtering functions of the kidney.Research suggests that PODN may play a role in modulating cell adhesion, migration, …	DEP
CPQ	Can you tell me the function of the protein "CPQ" (Carboxypeptidase Q) of human?	The function of the protein CPQ in humans is to cleave the C-terminal arginine and lysine residues from various bioactive peptides and proteins, including kinins, anaphylatoxins, and chemokines. It is primarily expressed in the brain and is thought to play a role in the regulation of neuronal activity and neuroinflammation.	DEP
RPS24	Can you tell me the function of the protein "RPS24" (40S ribosomal protein S24) of human?	RPS24 (40S ribosomal protein S24) is a component of the small ribosomal subunit of eukaryotic cells. This protein is essential for ribosomal activity, playing a role in the translation of messenger RNA (mRNA) into protein. Specifically, RPS24 helps to maintain the overall structure and stability of the small ribosomal subunit, and is thought to be involved in the binding of transfer RNA (tRNA) to…	DEP
SETD7	Can you tell me the function of the protein "SETD7" (Histone-lysine N-methyltransferase SETD7) of human?	SETD7 is a histone-lysine N-methyltransferase protein that plays a crucial role in the regulation of gene expression by modifying histone proteins. It specifically targets lysine 4 of histone 3 (H3K4), which is associated with transcriptional activation. SETD7 can also methylate non-histone proteins, such as p53 and tubulin, and thereby affect their functions in various cellular processes, includ…	DEP
PTPRS	Can you tell me the function of the protein "PTPRS" (Receptor-type tyrosine-protein phosphatase S) of human?	The protein PTPRS (receptor-type tyrosine-protein phosphatase S) of human is a receptor protein that belongs to the protein tyrosine phosphatase (PTP) family. Its function is to regulate cellular processes by dephosphorylation of tyrosine residues on target proteins, including growth factors, cell adhesion molecules, and receptors. PTPRS has been implicated in the development of the brain, the im…	DEP
ILK	Can you tell me the function of the protein "ILK" (Integrin-linked protein kinase) of human?	The ILK protein is involved in a variety of cellular processes such as cell adhesion, cell migration, cell proliferation, and cell differentiation. It plays a critical role in the interaction between integrin receptors and the extracellular matrix, which is essential for the maintenance of tissue integrity and the regulation of signaling pathways. ILK also functions as a signaling hub that integr…	DEP
IGHV3-43D	Can you tell me the function of the protein "IGHV3-43D" (Immunoglobulin heavy variable 3-43D) of human?	The protein IGHV3-43D is a variable domain of an immunoglobulin heavy chain. Its function is to contribute to the diversity of antigen-binding sites of B cell receptors, which are membrane-bound immunoglobulins that recognize and bind to specific antigens. This protein, along with other variable domains, determines the specificity of the B cell receptor and therefore plays a critical role in the …	DEP
EFEMP1	Can you tell me the function of the protein "EFEMP1" (EGF-containing fibulin-like extracellular matrix protein 1) of human?	EFEMP1 is a glycoprotein that is known to be involved in the regulation of cell adhesion, migration, and proliferation. It is a component of the extracellular matrix and is expressed in a variety of tissues, including skeletal muscle, lung, kidney, and heart. EFEMP1 has been shown to play a crucial role in different biological processes, such as structure formation of tissues, wound healing, vasc…	DEP
RAP1B	Can you tell me the function of the protein "RAP1B" (Ras-related protein Rap-1b) of human?	The protein RAP1B is a member of the Ras-related protein family and plays a role in signal transduction pathways by regulating various cellular processes such as cell adhesion, proliferation, and migration. Specifically, RAP1B has been found to regulate integrin-mediated cell adhesion and signaling, which is crucial for cell-extracellular matrix interactions and cell-cell communication. Additiona…	DEP
S100A4	Can you tell me the function of the protein "S100A4" (Protein S100-A4) of human?	The protein S100A4 (Protein S100-A4) is involved in various cellular processes such as regulation of cell growth, cell motility, and invasion. Specifically, it has been shown to play a role in metastasis, the spread of cancer cells from one part of the body to another. S100A4 has been found to be overexpressed in several types of cancer, including breast, colon, stomach, and lung cancer. It is be…	DEP
DOCK1	Can you tell me the function of the protein "DOCK1" (Dedicator of cytokinesis protein 1) of human?	The protein DOCK1 (Dedicator of cytokinesis protein 1) is involved in a variety of cellular processes, including cell migration, adhesion, and phagocytosis. It acts as a guanine nucleotide exchange factor (GEF) for the activation of Rho GTPases, which play a key role in controlling the cytoskeleton and cell shape. By facilitating the activation of Rho GTPases, DOCK1 regulates cell migration, inva…	DEP
APOC3	Can you tell me the function of the protein "APOC3" (Apolipoprotein C-III) of human?	The protein APOC3 (Apolipoprotein C-III) in humans is primarily involved in the regulation of lipids (fats) in the bloodstream. The protein is a component of several classes of lipoprotein particles, including very-low-density lipoprotein (VLDL) and high-density lipoprotein (HDL), which are involved in transporting cholesterol and triglycerides throughout the body.APOC3 helps to inhibit the break…	DEP
FGA	Can you tell me the function of the protein "FGA" (Fibrinogen alpha chain) of human?	The function of Fibrinogen alpha chain, or FGA, is to participate in the blood clotting process. Fibrinogen, which is a complex protein made up of three different chains (alpha, beta, and gamma), is converted to fibrin by the enzyme thrombin during blood clotting. The resulting fibrin forms a mesh that helps to stabilize and reinforce the blood clot. Thus, the FGA protein plays an important role …	DEP
LUC7L3	Can you tell me the function of the protein "LUC7L3" (Luc7-like protein 3) of human?	The protein LUC7L3 (Luc7-like protein 3) is a spliceosome-associated protein that is involved in pre-mRNA splicing, which is the process that produces mature mRNA molecules from pre-mRNA by removing introns and joining exons. LUC7L3 is specifically involved in the splicing of alternative exons and alternative 3' splice sites. It has also been shown to play a role in the regulation of alternative …	DEP
RBBP4	Can you tell me the function of the protein "RBBP4" (Histone-binding protein RBBP4) of human?	The protein RBBP4 (Retinoblastoma-binding protein 4), also known as Chromatin Assembly Factor 1 or Histone-binding protein RBBP4, is involved in chromatin remodeling and transcriptional regulation. It binds to histones and plays a role in the assembly of nucleosomes, a structural unit of chromatin. It is also involved in DNA replication and repair, cell cycle progression, and cellular differentia…	DEP
ERH	Can you tell me the function of the protein "ERH" (Enhancer of rudimentary homolog) of human?	The exact function of ERH protein is not fully known, but it is believed to be involved in several cellular processes including DNA repair, transcriptional regulation, cell proliferation, and apoptosis. ERH interacts with various proteins and plays a role in maintaining genomic stability. It has also been implicated in the pathogenesis of some cancers.	DEP
EIF2AK2	Can you tell me the function of the protein "EIF2AK2" (Interferon-induced, double-stranded RNA-activated protein kinase) of human?	EIF2AK2, also known as PKR (protein kinase R), is an intracellular serine/threonine kinase that is activated by double-stranded RNA (dsRNA). It plays a crucial role in the innate immune response against viral infections by sensing the presence of viral dsRNA and inducing a translational arrest in infected cells. The activation of EIF2AK2 results in the phosphorylation of the translation initiatio…	DEP
LPP	Can you tell me the function of the protein "LPP" (Lipoma-preferred partner) of human?	The protein LPP has been found to be involved in cell adhesion, migration, and signaling processes. It is thought to play a role in maintaining the stability of the actin cytoskeleton and promoting the formation of focal adhesions between cells and the extracellular matrix. It has also been linked to the regulation of cancer cell growth and metastasis.	DEP
AAMDC	Can you tell me the function of the protein "AAMDC" (Mth938 domain-containing protein) of human?	As an AI language model, I do not have access to the latest scientific research, therefore I do not possess an answer to this question. However, you may find information on the UniProt or NCBI websites, or consult a scientific article database to find the relevant information.	DEP
LIMS1	Can you tell me the function of the protein "LIMS1" (LIM and senescent cell antigen-like-containing domain protein 1) of human?	LIMS1 (LIM and senescent cell antigen-like-containing domain protein 1) is a multifunctional protein that plays important roles in a variety of cellular processes including cell adhesion, migration, proliferation, and differentiation. LIMS1 is involved in regulating cytoskeletal organization and cell shape by interacting with several actin-binding proteins such as vinculin, zyxin, and integrin-li…	DEP
GNG12	Can you tell me the function of the protein "GNG12" (Guanine nucleotide-binding protein G(I)/G(S)/G(O) subunit gamma-12) of human?	The function of the GNG12 protein is in the regulation of intracellular signaling pathways. Specifically, it is a subunit of the G protein-coupled receptor complex, which is involved in cellular responses to external stimuli such as hormones, neurotransmitters, and drugs. GNG12 helps to activate downstream signaling pathways that control various physiological processes including neurotransmission…	DEP
CD34	Can you tell me the function of the protein "CD34" (Hematopoietic progenitor cell antigen CD34) of human?	CD34 is a protein that is present on the surface of hematopoietic stem cells and progenitor cells, which are cells that give rise to different blood cells such as red blood cells, white blood cells, and platelets. The function of CD34 is to regulate stem cell proliferation and differentiation, as well as to maintain the stem cell pool. It is also involved in cell adhesion, migration, and signalin…	DEP
STAT1	Can you tell me the function of the protein "STAT1" (Signal transducer and activator of transcription 1-alpha/beta) of human?	STAT1 (Signal transducer and activator of transcription 1-alpha/beta) is a protein that plays an important role in regulating the immune response and anti-viral defense mechanisms of the human body. It acts as a transcription factor that translocates to the nucleus of cells and activates the expression of genes involved in cell proliferation, differentiation, and immune defense responses. STAT1 i…	DEP
SPARCL1	Can you tell me the function of the protein "SPARCL1" (SPARC-like protein 1) of human?	Yes, SPARCL1 (also known as Hevin) is a multidomain extracellular matrix protein that has been shown to have a variety of functions in human biology. Some of the known functions of SPARCL1 include	DEP
MCM2	Can you tell me the function of the protein "MCM2" (DNA replication licensing factor MCM2) of human?	The function of the protein MCM2 is to act as a DNA replication licensing factor. It is one of the six subunits of the MCM complex which is essential for DNA replication. MCM2 helps in the unwinding and separation of DNA strands during DNA replication, allowing the replication machinery to access the DNA template and replicate the DNA. It plays a crucial role in the initiation of DNA replication …	DEP
LAMA4	Can you tell me the function of the protein "LAMA4" (Laminin subunit alpha-4) of human?	LAMA4 is a protein that plays a role in the formation and maintenance of tissues in the human body. Specifically, it is a subunit of the laminin protein family, which is a major component of the extracellular matrix that surrounds cells and provides support and structure to tissues. LAMA4 is involved in cell adhesion, migration, and differentiation, and is important for the development and functi…	DEP
ITGA8	Can you tell me the function of the protein "ITGA8" (Integrin alpha-8) of human?	The protein ITGA8 (Integrin alpha-8) is involved in cell adhesion and plays a key role in the development and regulation of various tissues and organs, including the kidney, lungs, and nervous system. It forms a complex with the beta-1 subunit of integrin and plays a role in cell-matrix interactions, mediating cell migration, proliferation, and differentiation. Dysfunction of ITGA8 has been linke…	DEP
TMEM43	Can you tell me the function of the protein "TMEM43" (Transmembrane protein 43) of human?	The TMEM43 protein is involved in maintaining the structural integrity of the heart muscle cells. Mutations in the TMEM43 gene can lead to arrhythmogenic right ventricular cardiomyopathy (ARVC), a rare but potentially life-threatening condition in which the heart muscle is replaced with fibrous and fatty tissue. TMEM43 is thought to be involved in the regulation of cell adhesion and communication…	DEP
ADD3	Can you tell me the function of the protein "ADD3" (Gamma-adducin) of human?	The ADD3 protein, also known as Gamma-adducin, is involved in the stabilization of the spectrin-actin network in erythrocytes and other non-muscle cells. It is also involved in the organization of the actin cytoskeleton in neurons and contributes to dendritic spine structure and function. ADD3 has also been shown to be involved in cell migration and adhesion. Additionally, mutations in the ADD3 g…	DEP
HSPB6	Can you tell me the function of the protein "HSPB6" (Heat shock protein beta-6) of human?	Heat shock protein beta-6 (HSPB6) is an intracellular protein belonging to the heat shock protein family. It is highly expressed in cardiac and skeletal muscles and plays a role in protecting cells from stress-induced damage. HSPB6 is involved in regulating calcium-dependent muscle contraction by interacting with and modulating the activity of key proteins such as the ryanodine receptor and SERCA…	DEP
FBN1	Can you tell me the function of the protein "FBN1" (Fibrillin-1) of human?	The protein FBN1 (Fibrillin-1) is a major component of elastic fibers in various tissues, including the lungs, skin, and blood vessels. It plays a crucial role in the formation and maintenance of connective tissues, providing elasticity and mechanical strength. Mutations in the FBN1 gene have been associated with several genetic disorders, including Marfan syndrome, which is characterized by a ra…	DEP
PRKG1	Can you tell me the function of the protein "PRKG1" (cGMP-dependent protein kinase 1) of human?	The protein PRKG1 (cGMP-dependent protein kinase 1) of humans is an enzyme that is involved in various physiological processes, including smooth muscle relaxation, platelet aggregation, and cell proliferation. It plays a crucial role in regulating the cardiovascular system, including blood pressure, heart rate, and vascular tone. PRKG1 also plays a role in the regulation of the immune system, cel…	DEP
DNAJC7	Can you tell me the function of the protein "DNAJC7" (DnaJ homolog subfamily C member 7) of human?	The protein "DNAJC7" (DnaJ homolog subfamily C member 7) is involved in various cellular processes, including protein folding and degradation, endoplasmic reticulum-associated degradation, intracellular trafficking, and signal transduction. It has also been shown to play a role in regulating the activity of key cellular proteins, such as mitogen-activated protein kinases (MAPKs) and heat shock tr…	DEP
SYNE1	Can you tell me the function of the protein "SYNE1" (Nesprin-1) of human?	The protein SYNE1 or Nesprin-1 of human has several functions, including	DEP
GALNT3	Can you tell me the function of the protein "GALNT3" (Polypeptide N-acetylgalactosaminyltransferase 3) of human?	The protein GALNT3 (Polypeptide N-acetylgalactosaminyltransferase 3) is an enzyme that adds a sugar molecule called N-acetylgalactosamine to proteins. This process is known as O-glycosylation and helps to modify and regulate the function of various proteins in the body. GALNT3 has been shown to play a role in bone development, as mutations in the gene that encodes this protein have been associate…	DEP
ORM2	Can you tell me the function of the protein "ORM2" (Alpha-1-acid glycoprotein 2) of human?	The protein ORM2, also known as Alpha-1-acid glycoprotein 2, is a plasma protein that is primarily involved in the acute-phase response to inflammation and infection. It belongs to the lipocalin protein family and serves as a carrier for various endogenous and exogenous substances, including drugs, fatty acids, and steroids. ORM2 also plays a role in modulating immune responses and has been linke…	DEP
ALDH1A1	Can you tell me the function of the protein "ALDH1A1" (Retinal dehydrogenase 1) of human?	The protein ALDH1A1 (Retinal dehydrogenase 1) of human is an enzyme that plays a critical role in converting retinaldehyde to retinoic acid, which is involved in regulating gene expression, cell proliferation, and differentiation. Additionally, ALDH1A1 is involved in the detoxification of aldehydes and contributes to cellular resistance against oxidative stress. In cancer, it has been shown to be…	DEP
ORM1	Can you tell me the function of the protein "ORM1" (Alpha-1-acid glycoprotein 1) of human?	ORM1 (Alpha-1-acid glycoprotein 1) is a glycoprotein that is primarily synthesized in the liver and is present in the blood plasma. ORM1 plays an important role in the immune response and the regulation of inflammation. It functions as an acute phase protein that increases significantly during inflammatory conditions such as infection, tissue damage, or cancer. ORM1 has been suggested to modulate…	DEP
COPZ1	Can you tell me the function of the protein "COPZ1" (Coatomer subunit zeta-1) of human?	The protein COPZ1 (Coatomer subunit zeta-1) of human is a subunit of the coat protein complex I (COPI), which is involved in the transport of Golgi-resident proteins to the endoplasmic reticulum (ER), intra-Golgi transport, and retrograde transport from the Golgi to the ER. Specifically, COPZ1 is involved in the formation of the COPI coat and aids in cargo selection and transport. It is also impo…	DEP
PDLIM3	Can you tell me the function of the protein "PDLIM3" (PDZ and LIM domain protein 3) of human?	The protein PDLIM3 is involved in various cellular processes such as cytoskeletal organization, cell adhesion, and transcriptional regulation. It contains both PDZ and LIM domains, which are involved in protein-protein interactions. PDLIM3 has been shown to interact with actin cytoskeleton regulators, as well as with transcription factors that are important for neuronal development and function. …	DEP
TRIOBP	Can you tell me the function of the protein "TRIOBP" (TRIO and F-actin-binding protein) of human?	The TRIOBP (TRIO and F-actin-binding protein) protein in humans is involved in the organization of the actin cytoskeleton, which is essential for maintaining the cell shape, motility, and intracellular transport. TRIOBP is known to interact with F-actin, a type of actin filament, and participates in the formation and stabilization of the cell membrane in various tissues such as the nervous system…	DEP
SEPTIN11	Can you tell me the function of the protein "SEPTIN11" (Septin-11) of human?	Septin-11 (SEPTIN11) is a member of the septin family of proteins that are involved in the regulation of cytokinesis, cell morphology, and cell cycle progression. SEPTIN11 is specifically involved in the formation and maintenance of the cellular cytoskeleton, and has been shown to be necessary for proper cell division and the maintenance of cellular structure. It may also play a role in cancer de…	DEP
PDE5A	Can you tell me the function of the protein "PDE5A" (cGMP-specific 3',5'-cyclic phosphodiesterase) of human?	The protein PDE5A (cGMP-specific 3',5'-cyclic phosphodiesterase) in humans is an enzyme that plays a crucial role in regulating the levels of cyclic guanosine monophosphate (cGMP) in cells. It specifically breaks down cGMP, which is a signaling molecule involved in various cellular processes, including relaxation of smooth muscles, dilation of blood vessels, and regulation of heart function. Henc…	DEP
CASR	Can you tell me the function of the protein "CASR" (Extracellular calcium-sensing receptor) of human?	The primary function of the extracellular calcium-sensing receptor (CASR) protein in humans is to detect and respond to changes in circulating levels of ionized calcium. This receptor is mainly expressed in the parathyroid gland, kidneys, and bone cells, and it plays a crucial role in regulating calcium homeostasis and bone metabolism. CASR helps in suppressing parathyroid hormone (PTH) secretion…	DEP
EXOSC1	Can you tell me the function of the protein "EXOSC1" (Exosome complex component CSL4) of human?	The EXOSC1 protein is a component of the exosome complex involved in RNA degradation and processing. It is a subunit of the nuclear exosome complex that is involved in the processing and degradation of nuclear RNA. The exosome complex exists in both the nucleus and cytoplasm of eukaryotic cells and plays a crucial role in regulating gene expression by degrading or processing RNA molecules. As a c…	DEP
CRYZ	Can you tell me the function of the protein "CRYZ" (Quinone oxidoreductase) of human?	The protein CRYZ (Quinone oxidoreductase) of human is an enzyme that plays a crucial role in the metabolism of quinones, which are important molecules involved in several physiological processes such as electron transfer, hormone metabolism, and detoxification. CRYZ acts as an NADPH-dependent reductase, catalyzing the reduction of several quinones to their corresponding hydroquinones, and is also…	DEP
GLIPR2	Can you tell me the function of the protein "GLIPR2" (Golgi-associated plant pathogenesis-related protein 1) of human?	GLIPR2 (Golgi-associated plant pathogenesis-related protein 1) is a protein that is mainly found in the Golgi apparatus and is involved in multiple cellular processes, including cell death and differentiation, protein trafficking, and cell metabolism. It is thought to play a role in various diseases, including cancer, Alzheimer’s, and cardiovascular diseases. Research has also shown that GLIPR2 m…	DEP
IGHV3-33	Can you tell me the function of the protein "IGHV3-33" (Immunoglobulin heavy variable 3-33) of human?	The function of IGHV3-33 (Immunoglobulin heavy variable 3-33) protein of human is to produce the variable region of a specific type of antibody called immunoglobulin M (IgM). This antibody is an important part of the immune system, helping to identify and neutralize foreign substances (such as bacteria or viruses) in the body. The IGHV3-33 protein helps to give the IgM antibody its unique shape, …	DEP
IGHV3-30-3	Can you tell me the function of the protein "IGHV3-30-3" (Immunoglobulin heavy variable 3-30-3) of human?	As an AI language model, I do not have access to the latest medical records or research papers. However, as far as I know, immunoglobulin heavy variable (IGHV3-30-3) is a type of protein that is involved in the immune system response of humans. It is believed to play a role in neutralizing pathogenic microorganisms and viruses by binding to specific antigens on their surface. This protein is foun…	DEP
TAGLN	Can you tell me the function of the protein "TAGLN" (Transgelin) of human?	The protein TAGLN (Transgelin) of human has several functions, including	DEP
PARP14	Can you tell me the function of the protein "PARP14" (Protein mono-ADP-ribosyltransferase PARP14) of human?	PARP14 is involved in various cellular processes such as gene regulation, DNA repair, and inflammation. It acts as a mono-ADP-ribosyltransferase, transferring ADP-ribose groups from NAD+ to target proteins to modify their activity or stability. PARP14 is also known to interact with a variety of transcription factors and chromatin remodeling proteins, suggesting its role in regulating gene express…	DEP
OSBPL1A	Can you tell me the function of the protein "OSBPL1A" (Oxysterol-binding protein-related protein 1) of human?	The OSBPL1A protein is involved in lipid metabolism and is a member of the oxysterol-binding protein (OSBP) family. It plays a role in regulating cholesterol homeostasis and intracellular lipid transport, particularly in the endoplasmic reticulum (ER). OSBPL1A has been implicated in a variety of cellular processes such as vesicle trafficking, membrane fusion and signal transduction, and it has al…	DEP
HSPG2	Can you tell me the function of the protein "HSPG2" (Basement membrane-specific heparan sulfate proteoglycan core protein) of human?	The protein HSPG2 is a crucial component of the basement membrane, which is a specialized extracellular matrix that ensures the structural integrity of tissues and organs. HSPG2 acts as a core protein of heparan sulfate proteoglycans, which are a type of glycoprotein molecules that consist of a protein core and several long chains of sugar molecules called heparan sulfate. HSPG2 is involved in va…	DEP
MAMDC2	Can you tell me the function of the protein "MAMDC2" (MAM domain-containing protein 2) of human?	The function of the protein MAMDC2 in humans is not yet fully understood. However, some studies suggest that it may play a role in regulating the immune response and inflammation. Additionally, it has been proposed to be involved in cell adhesion and migration. Further research is needed to fully understand the function of MAMDC2.	DEP
HCCS	Can you tell me the function of the protein "HCCS" (Cytochrome c-type heme lyase) of human?	The HCCS protein (Cytochrome c-type heme lyase) in humans is responsible for attaching heme molecules to cytochrome c, an essential protein involved in the process of cellular respiration. This attachment of heme to cytochrome c allows it to function properly and participate in the electron transport chain, which ultimately generates ATP, the energy currency of cells. Therefore, the function of t…	DEP
NAXD	Can you tell me the function of the protein "NAXD" (ATP-dependent (S)-NAD(P)H-hydrate dehydratase) of human?	The protein NAXD (ATP-dependent (S)-NAD(P)H-hydrate dehydratase) is involved in the conversion of the hydrated forms of NADH and NADPH to their respective oxidized forms during cellular metabolism. This process is essential for generating energy in the form of ATP and for carrying out various metabolic reactions in the body. NAXD catalyzes the dehydration of NADH and NADPH at the expense of ATP h…	DEP
ITIH3	Can you tell me the function of the protein "ITIH3" (Inter-alpha-trypsin inhibitor heavy chain H3) of human?	ITIH3 is a glycoprotein that belongs to the inter-alpha-trypsin inhibitor (ITI) family. Its function is primarily to inhibit the activity of trypsin and other serine proteases. ITIH3 is involved in maintaining tissue homeostasis and has been implicated in inflammation, wound healing, and cancer progression. It also plays a potential role in the regulation of the complement system and has been ide…	DEP
SRSF6	Can you tell me the function of the protein "SRSF6" (Serine/arginine-rich splicing factor 6) of human?	The protein SRSF6 (Serine/arginine-rich splicing factor 6) is a splicing factor that is involved in the regulation of alternative splicing of pre-mRNA. It helps promote inclusion or exclusion of exons during splicing of pre-mRNA, which leads to the generation of different protein isoforms. SRSF6 has also been shown to play a role in mRNA export, mRNA stability, and translation regulation. Dysfunc…	DEP
NPTN	Can you tell me the function of the protein "NPTN" (Neuroplastin) of human?	The protein NPTN (Neuroplastin) is a cell adhesion molecule that plays an important role in synaptic plasticity, which is the ability of synapses (the junctions between nerve cells) to change in strength in response to experience. NPTN is found in high concentration in the brain and is involved in regulating the formation and stability of synapses, as well as promoting the growth and differentiat…	DEP
SELENBP1	Can you tell me the function of the protein "SELENBP1" (Methanethiol oxidase) of human?	SELENBP1 (selenium-binding protein 1) is not known to function as a Methanethiol oxidase in humans. The exact function of SELENBP1 is not fully understood, but it is believed to play a role in selenium metabolism and may have antioxidant activity. SELENBP1 has also been implicated in regulating growth and proliferation of cancer cells, but its precise role in cancer development is not yet clear.	DEP
GPD2	Can you tell me the function of the protein "GPD2" (Glycerol-3-phosphate dehydrogenase, mitochondrial) of human?	The protein GPD2 (Glycerol-3-phosphate dehydrogenase, mitochondrial) is an enzyme that plays a crucial role in energy production within the mitochondria of human cells. Specifically, it catalyzes the conversion of glycerol-3-phosphate to dihydroxyacetone phosphate, which is a key step in the process of cellular respiration, where glucose is broken down to provide energy for the cell. GPD2 is also…	DEP
DDX21	Can you tell me the function of the protein "DDX21" (Nucleolar RNA helicase 2) of human?	Yes, DDX21 (Nucleolar RNA helicase 2) is a protein in humans that functions as an RNA helicase, which means it unwinds RNA molecules to modulate RNA metabolism. It is primarily localized in the nucleoli of cells and is involved in processes such as ribosome biogenesis, RNA processing, and DNA repair. In addition, DDX21 has been associated with several diseases, including cancer and viral infectio…	DEP
ITGB1	Can you tell me the function of the protein "ITGB1" (Integrin beta-1) of human?	The protein ITGB1, also known as Integrin beta-1, is a transmembrane receptor protein that provides a link between the extracellular matrix and the cytoskeleton within cells. This integrin plays a role in cell adhesion, migration, and signaling. It is involved in important physiological processes such as cell proliferation, differentiation, and survival. ITGB1 also plays a key role in the immune …	DEP
JCHAIN	Can you tell me the function of the protein "JCHAIN" (Immunoglobulin J chain) of human?	The function of the protein JCHAIN in humans is to serve as a component of the immunoglobulin (antibody) molecule. It helps to bind the two halves of the antibody together and is important for the stability and secretion of certain types of immunoglobulins, such as IgA and IgM. JCHAIN also plays a role in the transportation of immunoglobulins across mucosal surfaces and in the regulation of the i…	DEP
MSH6	Can you tell me the function of the protein "MSH6" (DNA mismatch repair protein Msh6) of human?	The protein MSH6 is a key component of the DNA mismatch repair system in humans. Its main function is to recognize and repair mistakes that occur during DNA replication, such as misincorporated nucleotides or small insertions or deletions. By correcting these errors, MSH6 helps to maintain the integrity of the genome and prevent mutations that can lead to diseases such as cancer. MSH6 is also inv…	DEP
AMPD2	Can you tell me the function of the protein "AMPD2" (AMP deaminase 2) of human?	The protein AMPD2 (AMP deaminase 2) of human functions as an enzyme that catalyzes the conversion of AMP (adenosine monophosphate) to IMP (inosine monophosphate) in the purine nucleotide metabolic pathway. This enzyme is involved in the regulation of ATP (adenosine triphosphate) levels and energy metabolism in skeletal muscle. Mutations in the AMPD2 gene have been associated with increased risk o…	DEP
PECAM1	Can you tell me the function of the protein "PECAM1" (Platelet endothelial cell adhesion molecule) of human?	The protein PECAM1 (Platelet endothelial cell adhesion molecule) is involved in cell adhesion and plays a critical role in regulating leukocyte migration across endothelial cells, which is a key step in the immune response process. It is also involved in regulating cell signaling, apoptosis, and angiogenesis. In addition, PECAM1 has been found to be a marker for various cancers and can play a rol…	DEP
PYGB	Can you tell me the function of the protein "PYGB" (Glycogen phosphorylase, brain form) of human?	The protein PYGB (Glycogen phosphorylase, brain form) of humans is an enzyme that plays a key role in glycogen metabolism. It catalyzes the breakdown of glycogen into glucose-1-phosphate, which can then be used as an energy source by cells. Specifically, PYGB is responsible for the breakdown of glycogen in the brain and nervous system, where it is used to provide energy for proper brain function …	DEP
PI16	Can you tell me the function of the protein "PI16" (Peptidase inhibitor 16) of human?	The function of the protein PI16 (Peptidase inhibitor 16) of human is to inhibit the activity of certain proteases, which are enzymes that break down proteins. It has been suggested that PI16 may play a role in modulating inflammation and immune responses. Additionally, recent studies have shown that PI16 may also be involved in regulating tumor growth and metastasis.	DEP
NUP210	Can you tell me the function of the protein "NUP210" (Nuclear pore membrane glycoprotein 210) of human?	NUP210 is a component of the nuclear pore complex, which is an elaborate protein assembly that spans the nuclear membrane and controls the exchange of molecules between the nucleus and cytoplasm. NUP210 binds to other components of the nuclear pore complex and helps regulate the size and shape of the central channel through which molecules can pass. It may also play a role in dynamic changes to t…	DEP
VRK1	Can you tell me the function of the protein "VRK1" (Serine/threonine-protein kinase VRK1) of human?	The protein VRK1 (Serine/threonine-protein kinase VRK1) of humans is a member of the VRK family of serine/threonine protein kinases, which plays a role in various cellular processes, including regulation of cell cycle progression, DNA damage response, chromatin condensation, apoptosis, and autophagy. Specifically, VRK1 regulates the phosphorylation of histone proteins and contributes to the maint…	DEP
GNG2	Can you tell me the function of the protein "GNG2" (Guanine nucleotide-binding protein G(I)/G(S)/G(O) subunit gamma-2) of human?	The protein GNG2 (Guanine nucleotide-binding protein G(I)/G(S)/G(O) subunit gamma-2) of humans is a subunit of the G protein system that plays a crucial role in the transduction of signals from G protein-coupled receptors (GPCRs). This protein specifically functions as a gamma subunit for the G(o) alpha subunit, which is a member of the Gi family of proteins. G(o) performs an inhibitory role in r…	DEP
DPP4	Can you tell me the function of the protein "DPP4" (Dipeptidyl peptidase 4) of human?	The main function of DPP4 is the cleavage of proteins containing proline or alanine at the second position from the N-terminus, and it plays an essential role in regulating a variety of physiological processes, including glucose metabolism, immune response, and inflammation. In particular, DPP4 is a receptor for the Middle East respiratory syndrome coronavirus (MERS-CoV) and the human coronavirus…	DEP
ITIH1	Can you tell me the function of the protein "ITIH1" (Inter-alpha-trypsin inhibitor heavy chain H1) of human?	The function of the protein ITIH1 is to act as an inhibitor of enzymes involved in blood clotting and inflammation. It is also involved in the regulation of cell growth and differentiation. ITIH1 is part of the inter-alpha-trypsin family of proteins and plays a role in stabilizing this complex, which is important in modulating immune response and tissue repair. Additionally, ITIH1 has been implic…	DEP
ITPR1	Can you tell me the function of the protein "ITPR1" (Inositol 1,4,5-trisphosphate receptor type 1) of human?	The protein ITPR1 is a calcium channel that is located on the membrane of the endoplasmic reticulum in human cells. It is responsible for releasing calcium ions from the endoplasmic reticulum into the cytoplasm of the cell in response to various signaling events, such as the binding of neurotransmitters or hormones to their receptors on the cell surface. This release of calcium ions serves as a s…	DEP
THBS3	Can you tell me the function of the protein "THBS3" (Thrombospondin-3) of human?	The function of the THBS3 (Thrombospondin-3) protein in humans is not well understood. However, studies have suggested that it is involved in various processes such as angiogenesis, cell adhesion, and extracellular matrix organization. It may also have a role in cancer progression and metastasis. Further research is needed to fully understand the function of THBS3 in human biology.	DEP
PTGIS	Can you tell me the function of the protein "PTGIS" (Prostacyclin synthase) of human?	The function of the protein PTGIS (Prostacyclin synthase) is to catalyze the conversion of prostaglandin H2 to prostacyclin (PGI2), which is a potent vasodilator and inhibitor of platelet aggregation. This protein is primarily expressed in endothelial cells and plays a critical role in regulating vascular tone and blood clotting. Dysfunction of PTGIS has been linked to various cardiovascular dise…	DEP
APOOL	Can you tell me the function of the protein "APOOL" (MICOS complex subunit MIC27) of human?	The protein "APOOL" (MICOS complex subunit MIC27) of humans is a part of the mitochondrial contact site and cristae organizing system (MICOS) complex. It functions as a key structural component of the complex and is involved in the maintenance of mitochondrial cristae morphology and the stability of the inner mitochondrial membrane. It also plays a role in regulating the assembly and stability of…	DEP
IGHD	Can you tell me the function of the protein "IGHD" (Immunoglobulin heavy constant delta) of human?	The IGH constant delta (IGHD) gene codes for a protein that is part of the immunoglobulin delta heavy chain. Immunoglobulins, also known as antibodies, are proteins produced by B cells that bind to specific foreign substances, such as bacteria or viruses, and help to neutralize or eliminate them from the body. The IGHD protein is involved in the formation of the constant region of the delta heavy…	DEP
LIMS2	Can you tell me the function of the protein "LIMS2" (LIM and senescent cell antigen-like-containing domain protein 2) of human?	The protein LIMS2 is involved in the regulation of various cellular processes, including cell adhesion, migration, and differentiation. It is believed to play a role in the organization of the actin cytoskeleton and in the maintenance of cellular polarity. Dysregulation of LIMS2 has been implicated in a variety of diseases, including cancer, cardiovascular diseases, and neuromuscular disorders.	DEP
STAT2	Can you tell me the function of the protein "STAT2" (Signal transducer and activator of transcription 2) of human?	The protein STAT2 is a transcription factor that plays a key role in the signaling pathway of interferons, which are important molecules in the immune system. When interferons bind to their corresponding receptors on the surface of cells, STAT2 is activated and becomes phosphorylated. This leads to the formation of a complex with another transcription factor, STAT1, and other proteins, which then…	DEP
CBX5	Can you tell me the function of the protein "CBX5" (Chromobox protein homolog 5) of human?	The protein CBX5 is a component of polycomb group (PcG) protein complex, which plays a crucial role in gene regulation and epigenetic silencing of target genes. Specifically, CBX5 binds to histone H3 methylated at lysine 27, recruiting the other components of the PcG complex to silence target genes involved in cellular differentiation and proliferation. CBX5 is also involved in DNA replication an…	DEP
VTN	Can you tell me the function of the protein "VTN" (Vitronectin) of human?	Vitronectin (VTN) is a protein found in human blood plasma and extracellular matrix (ECM) that plays a role in cell adhesion, migration, and differentiation. It has been found to be involved in several biological processes such as clotting, tissue remodeling, wound healing, and bone formation. Additionally, VTN has been shown to interact with various other proteins and signaling pathways, such as…	DEP
L1CAM	Can you tell me the function of the protein "L1CAM" (Neural cell adhesion molecule L1) of human?	The L1CAM (Neural cell adhesion molecule L1) protein plays a crucial role in the development and maintenance of the nervous system. It functions as an adhesion molecule, facilitating the adhesion and migration of neurons during development. It is also involved in axonal growth and guidance, neurite outgrowth, and synaptic plasticity. Mutations in the L1CAM gene are associated with a variety of ne…	DEP
ASPN	Can you tell me the function of the protein "ASPN" (Asporin) of human?	ASPN (Asporin) is a small, secreted, extracellular matrix protein that acts as a negative regulator of certain signaling pathways involved in the development and maintenance of bone, cartilage, and other connective tissues. It binds to and inhibits the activity of transforming growth factor beta (TGF-β) and bone morphogenetic protein (BMP), both of which are important for the growth and different…	DEP
MCM7	Can you tell me the function of the protein "MCM7" (DNA replication licensing factor MCM7) of human?	Yes, the protein MCM7 is a subunit of the DNA replication licensing factor MCM complex, which is involved in DNA replication initiation and elongation. MCM7 plays a crucial role in the assembly and activation of the MCM complex and is essential for the proper regulation and progression of DNA replication. Dysfunction or altered expression of MCM7 has been linked to various diseases, including can…	DEP
CDK14	Can you tell me the function of the protein "CDK14" (Cyclin-dependent kinase 14) of human?	Yes, CDK14, also known as PFTK1 (PFTAIRE kinase 1), is a protein that belongs to the cyclin-dependent kinase family. Its main function is to regulate the cell cycle and cellular metabolism by phosphorylating different target proteins. CDK14 has been shown to play a role in many cellular processes, including cell division, proliferation, and differentiation, and has been implicated in the developm…	DEP
CDK2	Can you tell me the function of the protein "CDK2" (Cyclin-dependent kinase 2) of human?	CDK2 is a protein that plays a crucial role in regulation of the cell cycle. Specifically, CDK2 helps to drive the cell from the G1 phase to the S phase, which is where DNA synthesis occurs. CDK2 is activated by binding to a specific cyclin protein, and once activated, it helps to phosphorylate downstream targets that promote progression through the cell cycle. Dysregulation of CDK2 activity is a…	DEP
CDK15	Can you tell me the function of the protein "CDK15" (Cyclin-dependent kinase 15) of human?	CDK15 is a protein that belongs to the family of Cyclin-dependent kinases, which are enzymes involved in cell cycle regulation, transcription, and other cellular processes. Its exact function in humans is not fully understood, but studies suggest that it may play a role in neuronal development and synaptic plasticity. CDK15 has also been linked to cancer and inflammation, suggesting its potential…	DEP
SEPTIN5	Can you tell me the function of the protein "SEPTIN5" (Septin-5) of human?	The protein SEPTIN5 is a member of the septin family of GTP-binding proteins and is involved in a variety of cellular processes, including cytokinesis, vesicle trafficking, and membrane compartmentalization. Specifically, SEPTIN5 is known to play a role in neurite outgrowth, synaptic transmission, and dendritic spine formation, suggesting its importance in neuronal development and plasticity. It …	DEP
RFC2	Can you tell me the function of the protein "RFC2" (Replication factor C subunit 2) of human?	RFC2 is a subunit of Replication Factor C or RFC, which is a five-subunit protein complex involved in DNA replication and repair. RFC2 plays a crucial role in loading the sliding clamp protein PCNA onto newly synthesized DNA strands during DNA replication. PCNA interacts with DNA polymerases and facilitates their processivity, thereby enhancing DNA replication efficiency. RFC2 also participates i…	DEP
CAPN5	Can you tell me the function of the protein "CAPN5" (Calpain-5) of human?	CAPN5 (Calpain-5) is a protein that belongs to the calpain family of cytosolic calcium-dependent proteases. Its exact function in human cells is not well understood, but it has been implicated in various physiological processes, including cell migration, differentiation, and apoptosis. CAPN5 is known to cleave several cytoskeletal and extracellular matrix proteins that are involved in these proce…	DEP
OAS3	Can you tell me the function of the protein "OAS3" (2'-5'-oligoadenylate synthase 3) of human?	The protein OAS3 (2'-5'-oligoadenylate synthase 3) is an enzyme that plays a role in the innate immune response to viral infections. It is part of the OAS/RNase L pathway, which generates small RNA fragments that can degrade viral RNA and activate other antiviral proteins. OAS3 specifically synthesizes the 2'-5'-oligoadenylates that are necessary for activating RNase L, leading to viral RNA degra…	DEP
COPE	Can you tell me the function of the protein "COPE" (Coatomer subunit epsilon) of human?	The COPE protein is a subunit of the coatomer complex that plays a role in vesicle-mediated protein trafficking within the cell. Specifically, it is involved in the formation and maintenance of the Golgi complex and ER-Golgi transport. It also mediates the retrograde transport of proteins from the Golgi back to the ER. Dysfunction of COPE has been linked to neurodegenerative diseases, such as Alz…	DEP
RNF213	Can you tell me the function of the protein "RNF213" (E3 ubiquitin-protein ligase RNF213) of human?	The RNF213 protein is an E3 ubiquitin-protein ligase, which means it plays a role in adding small protein molecules called ubiquitin to other proteins, a process called ubiquitination. This ubiquitination can affect the function or stability of the targeted protein, leading to various cellular outcomes. RNF213 is specifically involved in the development and maintenance of blood vessels in the bra…	DEP
PDLIM7	Can you tell me the function of the protein "PDLIM7" (PDZ and LIM domain protein 7) of human?	The protein PDLIM7 (PDZ and LIM domain protein 7) has various functions, including regulating the organization of the actin cytoskeleton, maintaining the integrity of the sarcomere in cardiac muscles, and controlling the transcription of genes involved in cardiac development. Additionally, studies suggest that PDLIM7 may have a role in tumorigenesis by promoting cell migration and invasion.	DEP
FGB	Can you tell me the function of the protein "FGB" (Fibrinogen beta chain) of human?	The FGB protein (Fibrinogen beta chain) is a component of fibrinogen, a blood clotting protein. The beta chain is involved in the conversion of fibrinogen into a fibrin clot, which is essential for wound healing and preventing excessive blood loss. It also plays a role in the regulation of angiogenesis (the formation of new blood vessels) and inflammation. Dysfunction or mutations in the FGB gene…	DEP
RPS4Y1	Can you tell me the function of the protein "RPS4Y1" (40S ribosomal protein S4, Y isoform 1) of human?	The protein RPS4Y1 is a component of the 40S ribosomal subunit, which is involved in the translation of messenger RNA into proteins. Specifically, RPS4Y1 is responsible for binding to the mRNA and assisting in the formation of the initiation complex during translation. Additionally, RPS4Y1 has been shown to have a role in the regulation of cell growth and proliferation. It is a Y-linked gene and …	DEP
RPS4X	Can you tell me the function of the protein "RPS4X" (40S ribosomal protein S4, X isoform) of human?	The function of the protein RPS4X (40S ribosomal protein S4, X isoform) in humans is to participate in the assembly of ribosomes, which are cellular structures responsible for protein synthesis. RPS4X binds to the ribosomal RNA and helps in the formation of the small ribosome subunit. It also plays a role in the regulation of translation initiation, where it helps to recruit messenger RNA (mRNA) …	DEP
RPS4Y2	Can you tell me the function of the protein "RPS4Y2" (40S ribosomal protein S4, Y isoform 2) of human?	As an AI language model, I do not have access to the most recent scientific researches or databases, so I cannot guarantee the accuracy of the information I will provide. However, according to the NCBI Gene database, RPS4Y2 encodes a ribosomal protein that is a component of the 40S subunit of ribosomes, which are responsible for protein synthesis in the cell. Ribosomal proteins play a vital role …	DEP
CSRP1	Can you tell me the function of the protein "CSRP1" (Cysteine and glycine-rich protein 1) of human?	CSRP1 is a multi-functional protein that plays a crucial role in the regulation of various cellular processes in humans. Some of the known functions of CSRP1 include	DEP
POLE2	Can you tell me the function of the protein "POLE2" (DNA polymerase epsilon subunit 2) of human?	The POLE2 protein is a subunit of the DNA polymerase epsilon complex, which is involved in DNA replication and repair. Specifically, POLE2 helps to regulate the activity of the DNA polymerase epsilon enzyme, which is responsible for copying the leading strand of DNA during replication. Mutations in the POLE2 gene have been linked to an increased risk of certain types of cancer, likely due to defe…	DEP
PSME3	Can you tell me the function of the protein "PSME3" (Proteasome activator complex subunit 3) of human?	The PSME3 protein is known to be an essential subunit of the proteasome activator complex, which is responsible for promoting the opening of the proteasome's gate and the entry of ubiquitinated substrate proteins for degradation. Therefore, PSME3 plays a critical role in the regulation of protein turnover and maintenance of cellular homeostasis. Additionally, PSME3 has been implicated in various …	DEP
DIAPH2	Can you tell me the function of the protein "DIAPH2" (Protein diaphanous homolog 2) of human?	The protein DIAPH2 (Diaphanous Homolog 2) is involved in the regulation of actin cytoskeleton reorganization, cell motility, and cell polarity. It plays an important role in the development and maintenance of multiple organ systems, including the nervous system, the respiratory system, the cardiovascular system, and the reproductive system. Mutations in the DIAPH2 gene have been associated with s…	DEP
CBX3	Can you tell me the function of the protein "CBX3" (Chromobox protein homolog 3) of human?	Yes, CBX3, also known as HP1γ, is a protein that belongs to the family of chromobox (CBX) proteins. It functions as a chromatin-associated protein that plays a role in regulating gene expression by modulating chromatin structure and function. Specifically, CBX3 is involved in the formation of heterochromatin, a condensed and transcriptionally inactive form of chromatin, through its interaction wi…	DEP
RRAS2	Can you tell me the function of the protein "RRAS2" (Ras-related protein R-Ras2) of human?	The protein RRAS2 is involved in cell signaling pathways, specifically in the regulation of cell growth and differentiation. It has been found to play a role in a variety of cellular processes, including cell adhesion, migration, and invasion, and is implicated in the development of cancer and other diseases. RRAS2 has also been shown to regulate the activity of other signaling pathways, such as …	DEP
TRA2B	Can you tell me the function of the protein "TRA2B" (Transformer-2 protein homolog beta) of human?	The protein TRA2B (Transformer-2 protein homolog beta) of humans is a splicing regulator protein that plays a critical role in alternative splicing of pre-mRNAs, which is the process by which different mRNA isoforms are produced from a single gene. TRA2B binds to specific RNA sequences in pre-mRNAs and functions as a splicing factor in the spliceosome, a multi-protein complex that mediates splici…	DEP
DNPEP	Can you tell me the function of the protein "DNPEP" (Aspartyl aminopeptidase) of human?	The DNPEP protein, also known as Aspartyl aminopeptidase, is an enzyme that catalyzes the hydrolysis of N-terminal aspartic acid residues from peptides, which assists in the processing of proteins. This enzymatic activity is believed to be involved in numerous physiological processes, including protein degradation, cell proliferation, and angiogenesis. Additionally, it has been suggested that DNP…	DEP
SOD1	Can you tell me the function of the protein "SOD1" (Superoxide dismutase [Cu-Zn]) of human?	The function of the protein SOD1 (Superoxide dismutase [Cu-Zn]) of human is to help protect cells from damage caused by free radicals, which are highly reactive and potentially harmful molecules. SOD1 works by converting the superoxide anion free radical into hydrogen peroxide, which is then further broken down into water and oxygen by other enzymes. This process helps to prevent oxidative damage…	DEP
RSU1	Can you tell me the function of the protein "RSU1" (Ras suppressor protein 1) of human?	The protein RSU1 is a human Ras suppressor protein-1 that plays a role in regulating cellular activities such as the assembly of the cytoskeleton and cell adhesion. It acts as a suppressor of the Ras signaling pathway, which is responsible for regulating cell growth, proliferation, and differentiation. RSU1 helps to inhibit Ras-mediated cell transformation and tumorigenesis by interacting with va…	DEP
RCC2	Can you tell me the function of the protein "RCC2" (Protein RCC2) of human?	The protein RCC2 (Regulator of Chromosome Condensation 2) is known to play a key role in regulating the process of chromosome condensation during cell division. Specifically, RCC2 is a guanine nucleotide exchange factor (GEF) that activates the small GTPase protein Ran, which is involved in the transport of proteins and RNA molecules across the nuclear envelope. RCC2 helps to coordinate the timin…	DEP
SMC2	Can you tell me the function of the protein "SMC2" (Structural maintenance of chromosomes protein 2) of human?	The protein SMC2 (Structural maintenance of chromosomes protein 2) of humans is involved in chromosome condensation and cohesion during mitosis and meiosis. It is a subunit of the cohesin complex, which is responsible for stabilizing the interaction between sister chromatids after DNA replication. SMC2 plays an essential role in maintaining genomic integrity and ensuring faithful chromosome segre…	DEP
NES	Can you tell me the function of the protein "NES" (Nestin) of human?	The protein NES (Nestin) is a type IV intermediate filament protein that is primarily expressed in neural stem cells and progenitor cells. Its main function is to regulate cell division and differentiation in the nervous system during development and repair. It is also involved in the maintenance of the cytoskeleton, which gives cells their shape and helps them to move and divide. Additionally, N…	DEP
SMTN	Can you tell me the function of the protein "SMTN" (Smoothelin) of human?	SMTN (Smoothelin) is a protein found in smooth muscle cells, particularly in the walls of blood vessels and other hollow organs such as the intestines and bladder. It acts as a structural protein that helps to stabilize actin filaments in smooth muscle cells, which in turn plays a role in regulating smooth muscle contraction and relaxation. Additionally, studies suggest that SMTN may play a role …	DEP
HNRNPA1	Can you tell me the function of the protein "HNRNPA1" (Heterogeneous nuclear ribonucleoprotein A1) of human?	HNRNPA1 is a RNA-binding protein that is involved in various cellular processes such as pre-mRNA splicing, mRNA stability, and translation. It plays a crucial role in the regulation of gene expression and the processing of RNA molecules. In addition, HNRNPA1 is involved in cellular signaling pathways and has been implicated in the development and progression of various diseases, including cancer,…	DEP
HNRNPA1L2	Can you tell me the function of the protein "HNRNPA1L2" (Heterogeneous nuclear ribonucleoprotein A1-like 2) of human?	The specific function of HNRNPA1L2 is not fully understood, but it is thought to play a role in pre-mRNA splicing and RNA metabolism. It is also potentially involved in cellular processes such as DNA damage response, RNA transcription, and translation. Additionally, it has been suggested to have a role in the pathogenesis of certain diseases, including cancer and neurodegenerative disorders.	DEP
PARP1	Can you tell me the function of the protein "PARP1" (Poly [ADP-ribose] polymerase 1) of human?	PARP1 is an enzyme that plays an important role in repairing damaged DNA. It is involved in the base excision repair pathway, which is responsible for fixing single-strand DNA breaks caused by factors such as radiation and chemotherapy. PARP1 adds a chain of ADP-ribose molecules to proteins that are involved in the repair process, thus facilitating their recruitment and activation at the site of …	DEP
PPA1	Can you tell me the function of the protein "PPA1" (Inorganic pyrophosphatase) of human?	The protein PPA1 (Inorganic pyrophosphatase) of human has the function of catalyzing the hydrolysis of inorganic pyrophosphate (PPi) into two molecules of inorganic phosphate (Pi). This process is important for the maintenance of proper energy metabolism and helps regulate various cellular processes such as DNA synthesis, RNA transcription, and protein synthesis. PPA1 is found in many tissues and…	DEP
QPRT	Can you tell me the function of the protein "QPRT" (Nicotinate-nucleotide pyrophosphorylase [carboxylating]) of human?	The protein QPRT (Nicotinate-nucleotide pyrophosphorylase [carboxylating]) of humans performs the function of converting quinolinic acid (QA) to nicotinic acid mononucleotide (NaMN) in the tryptophan degradation pathway. This conversion is essential for the biosynthesis of the coenzyme nicotinamide adenine dinucleotide (NAD+), which is involved in key cellular processes such as energy production …	DEP
L3HYPDH	Can you tell me the function of the protein "L3HYPDH" (Trans-3-hydroxy-L-proline dehydratase) of human?	The function of the protein L3HYPDH is to catalyze the dehydration of trans-3-hydroxy-L-proline to delta-1-pyrroline-2-carboxylate, which is an intermediate in the biosynthesis of the amino acid proline. This reaction occurs in the mitochondria of human cells and is important for maintaining proper proline metabolism. Deficiencies in L3HYPDH activity have been associated with a rare genetic disor…	DEP
PTBP3	Can you tell me the function of the protein "PTBP3" (Polypyrimidine tract-binding protein 3) of human?	The exact function of PTBP3 (Polypyrimidine tract-binding protein 3) in human is not fully understood. However, it is known to be involved in alternative splicing, which is a process that generates multiple protein isoforms from a single gene by including or excluding certain exons. There have also been some studies that suggest a possible role of PTBP3 in tumor growth and development.	DEP
SCRN2	Can you tell me the function of the protein "SCRN2" (Secernin-2) of human?	The specific function of SCRN2 protein is not well-known yet, however, it has been suggested to play a role in the trafficking of proteins in the secretory pathway. Additionally, studies have proposed the involvement of SCRN2 in the regulation of exocytosis and neurotransmitter release in neurons. SCRN2 has also been linked to cancer development and progression, although the exact mechanism is st…	DEP
BCHE	Can you tell me the function of the protein "BCHE" (Cholinesterase) of human?	The protein BCHE (Butyrylcholinesterase) is an enzyme that breaks down acetylcholine, a neurotransmitter in the nervous system. This protein helps regulate the amount of acetylcholine in the body, which is important for proper muscle and nerve functioning. BCHE is also used clinically to reverse the effects of certain muscle relaxants and anesthetics.	DEP
HSD17B4	Can you tell me the function of the protein "HSD17B4" (Peroxisomal multifunctional enzyme type 2) of human?	The protein HSD17B4 (Peroxisomal multifunctional enzyme type 2) of human has multiple functions, including	DEP
CLIP2	Can you tell me the function of the protein "CLIP2" (CAP-Gly domain-containing linker protein 2) of human?	The protein CLIP2 (CAP-Gly domain-containing linker protein 2) is involved in regulating microtubule dynamics and in the maintenance of the cytoskeleton. It plays a role in cell division, neuronal migration, and synaptic plasticity. Mutations in the CLIP2 gene have been associated with intellectual disability, epilepsy, and autism.	DEP
NRP1	Can you tell me the function of the protein "NRP1" (Neuropilin-1) of human?	Neuropilin-1 (NRP1) is a transmembrane protein that plays an important role in several cellular processes, including axonal guidance and vascular development. Specifically, it is a co-receptor for vascular endothelial growth factors (VEGF) and semaphorins, which are proteins that regulate blood vessel formation and neuronal development, respectively. NRP1 also appears to be involved in tumor grow…	DEP
SNCA	Can you tell me the function of the protein "SNCA" (Alpha-synuclein) of human?	Alpha-synuclein (SNCA) is a protein present primarily in the brain and is believed to play a role in the regulation of neurotransmitter release. It is thought to be involved in the formation and maintenance of synaptic vesicles, which store and transport neurotransmitters within neurons. However, in some neurological disorders, such as Parkinson's disease, alpha-synuclein accumulates abnormally a…	DEP
EHD3	Can you tell me the function of the protein "EHD3" (EH domain-containing protein 3) of human?	The protein EHD3 (EH domain-containing protein 3) is believed to play a role in intracellular protein trafficking and the maintenance of the structure and function of the cell membrane. It is involved in the regulation of endocytic recycling and sorting of membrane proteins, which is essential for cell homeostasis and signal transduction. Additionally, EHD3 has been implicated in the development …	DEP
SELENOP	Can you tell me the function of the protein "SELENOP" (Selenoprotein P) of human?	SELENOP (Selenoprotein P) is a protein in humans that plays an important role in transport and storage of the essential trace element selenium. It is synthesized primarily in the liver and secreted into the blood, where it binds to selenium and transports it to various tissues in the body. SELENOP is also involved in regulating the antioxidant defense system, protecting cells from oxidative damag…	DEP
SLC16A3	Can you tell me the function of the protein "SLC16A3" (Monocarboxylate transporter 4) of human?	SLC16A3, also known as monocarboxylate transporter 4 (MCT4), is a protein that facilitates the transport of lactate and other monocarboxylates across cell membranes. This protein plays an important role in regulating energy metabolism and pH balance in cells, particularly in highly glycolytic tissues such as skeletal muscle, heart, and cancer cells. MCT4 is also involved in lactate shuttle mechan…	DEP
REL	Can you tell me the function of the protein "REL" (Proto-oncogene c-Rel) of human?	Proto-oncogene c-Rel is a transcription factor protein that binds to DNA and regulates the expression of genes involved in immune response and inflammatory processes. It is particularly important for the development and function of T cells and B cells in the immune system. REL is also involved in the initiation and progression of certain types of cancer, particularly lymphoma and leukemia.	DEP
MYO1E	Can you tell me the function of the protein "MYO1E" (Unconventional myosin-Ie) of human?	The protein MYO1E, also known as Unconventional myosin-Ie, is involved in the movement and organization of organelles within cells. Specifically, it is responsible for the movement of endocytic vesicles and other intracellular transport vesicles along actin filaments in cells. It also plays a role in the regulation of cell signaling pathways and is important for cell migration and adhesion. Mutat…	DEP
GUCY1A1	Can you tell me the function of the protein "GUCY1A1" (Guanylate cyclase soluble subunit alpha-1) of human?	The protein GUCY1A1, also known as soluble guanylate cyclase alpha-1, is a type of enzyme found in humans that is involved in the signaling pathway of the molecule nitric oxide. Specifically, GUCY1A1 converts guanosine triphosphate (GTP) to cyclic guanosine monophosphate (cGMP), which is an important secondary messenger molecule involved in various cellular functions such as smooth muscle relaxat…	DEP
EMILIN2	Can you tell me the function of the protein "EMILIN2" (EMILIN-2) of human?	The protein EMILIN2 (EMILIN-2) in humans is a glycoprotein that belongs to the Emilin family. It is primarily involved in the formation of extracellular matrix (ECM) and plays critical roles in tissue remodeling, cell adhesion, and cell signaling. More specifically, EMILIN2 has been shown to interact with other ECM proteins such as elastin and fibrillin, as well as with integrin receptors on cell…	DEP
METTL18	Can you tell me the function of the protein "METTL18" (Histidine protein methyltransferase 1 homolog) of human?	The exact function of METTL18 (Histidine protein methyltransferase 1 homolog) is not well understood yet, but experimental evidence suggests that it may be involved in the methylation of certain proteins and play a role in regulating cellular processes such as RNA processing, protein translation, and protein stability. Further research is needed to fully elucidate the function of METTL18.	DEP
PTPN1	Can you tell me the function of the protein "PTPN1" (Tyrosine-protein phosphatase non-receptor type 1) of human?	The protein PTPN1 is commonly known as Tyrosine-protein phosphatase non-receptor type 1. This protein is encoded by the PTPN1 gene in humans. The main function of PTPN1 is to remove phosphate groups from tyrosine residues on proteins. By doing so, PTPN1 regulates several cellular signaling pathways, including insulin signaling, growth factor signaling, and immune response.PTPN1 is mainly expresse…	DEP
SEC61B	Can you tell me the function of the protein "SEC61B" (Protein transport protein Sec61 subunit beta) of human?	The protein SEC61B is a component of the protein translocation channel, Sec61, which facilitates the transport of secretory and membrane proteins across the endoplasmic reticulum (ER) membrane. Specifically, SEC61B forms part of a heterotrimeric complex with SEC61A and SEC61G, which acts as a protein-conducting channel that spans the ER membrane. The complex is responsible for the integration of …	DEP
F11	Can you tell me the function of the protein "F11" (Coagulation factor XI) of human?	Coagulation factor XI (F11) is a protein that plays a vital role in the blood-coagulation cascade. It is an enzyme that helps to activate the clotting system by converting factor IX to its active form, which then leads to the formation of thrombin and formation of a blood clot. F11 deficiency can lead to an increased risk of bleeding disorders.	DEP
TUBB2A	Can you tell me the function of the protein "TUBB2A" (Tubulin beta-2A chain) of human?	TUBB2A (Tubulin beta-2A chain) is a protein that is involved in the formation of microtubules, which are essential components of the cytoskeleton. Microtubules play a critical role in several cellular processes, including cell division, intracellular transport, and cell shape maintenance. TUBB2A, as a part of the microtubule structure, helps to provide stability and maintain the structure of cell…	DEP
DNMT1	Can you tell me the function of the protein "DNMT1" (DNA (cytosine-5)-methyltransferase 1) of human?	DNMT1 is an enzyme that is responsible for adding a methyl group to the cytosine base, which is one of the four bases that make up DNA. This process is called DNA methylation and it plays a crucial role in regulating gene expression and maintaining the stability of the genome. Specifically, DNMT1 helps to maintain the methylation pattern of newly synthesized DNA during replication, ensuring that …	DEP
INPP5A	Can you tell me the function of the protein "INPP5A" (Inositol polyphosphate-5-phosphatase A) of human?	The protein INPP5A is an enzyme that plays a role in the regulation of cellular signaling pathways by dephosphorylating inositol phosphates. Specifically, it cleaves the 5-phosphate group from inositol 3,4,5-trisphosphate (Ins(3,4,5)P3), which is involved in the action of several signaling molecules, including calcium, which regulates many physiological processes, including cell growth, gene expr…	DEP
AOC2	Can you tell me the function of the protein "AOC2" (Retina-specific copper amine oxidase) of human?	The protein AOC2, also known as Retina-specific copper amine oxidase, is an enzyme that catalyzes the oxidative deamination of some primary amines and thus generates hydrogen peroxide and an aldehyde or ketone. It is specifically expressed in the retina where it may play a role in the regulation of neurotransmitter levels, the maintenance of neurotransmitter homeostasis, and the development of th…	DEP
GAR1	Can you tell me the function of the protein "GAR1" (H/ACA ribonucleoprotein complex subunit 1) of human?	The protein GAR1 (H/ACA ribonucleoprotein complex subunit 1) of human is a component of the H/ACA ribonucleoprotein (RNP) complex, which is involved in the post-transcriptional modification of ribosomal RNAs and other non-coding RNAs. The H/ACA RNP complex catalyzes the isomerization of uridine to pseudouridine, a modification that is important for proper RNA folding and stability. GAR1 is one of…	DEP
MSH2	Can you tell me the function of the protein "MSH2" (DNA mismatch repair protein Msh2) of human?	The protein MSH2 is a key component of the DNA mismatch repair pathway, which is responsible for detecting and repairing errors that occur during DNA replication. The MSH2 protein plays a critical role in recognizing mismatches that occur between the two strands of DNA and initiating repair by recruiting other proteins to the site of the error. Mutations in the MSH2 gene have been linked to hered…	DEP
FGG	Can you tell me the function of the protein "FGG" (Fibrinogen gamma chain) of human?	The protein FGG (Fibrinogen gamma chain) functions as part of the fibrin clot that helps to stop bleeding after injury. Fibrinogen is a soluble protein that is converted into fibrin by the enzyme thrombin to form a fibrin clot. The gamma chain of fibrinogen is important for the cross-linking of fibrin strands, which increases the strength and stability of the clot. This protein is also involved i…	DEP
MCM6	Can you tell me the function of the protein "MCM6" (DNA replication licensing factor MCM6) of human?	The protein MCM6 (DNA replication licensing factor MCM6) plays a crucial role in DNA replication by being a component of the minichromosome maintenance (MCM) complex. This complex is responsible for ensuring the accurate duplication of DNA during the S phase of the cell cycle. MCM6 is essential for the initiation of DNA replication by recruiting other factors to the DNA replication origin, which …	DEP
OCIAD2	Can you tell me the function of the protein "OCIAD2" (OCIA domain-containing protein 2) of human?	OCIAD2 (OCIA domain-containing protein 2) is a protein that plays a role in cell proliferation and differentiation. Specifically, it has been shown to suppress the differentiation of osteoblasts (cells that form bone) by inhibiting the activity of a transcription factor called Runx2. Additionally, OCIAD2 has been implicated in the regulation of other cellular processes, such as apoptosis (program…	DEP
DSG2	Can you tell me the function of the protein "DSG2" (Desmoglein-2) of human?	DSG2, also known as Desmoglein-2, is a protein that plays a critical role in the formation and maintenance of cell-cell adhesion in tissues, especially in the heart and skin. It is a transmembrane glycoprotein that is a member of the desmosomal cadherin superfamily. DSG2 is primarily found on the surface of cells in the epidermis and the heart. In the skin, it is responsible for the cohesion of t…	DEP
ENTPD1	Can you tell me the function of the protein "ENTPD1" (Ectonucleoside triphosphate diphosphohydrolase 1) of human?	The protein ENTPD1 (Ectonucleoside triphosphate diphosphohydrolase 1) of human functions as an enzyme that catalyzes the hydrolysis of extracellular nucleotides, such as ATP, ADP, and UDP, into their respective nucleosides and inorganic phosphate. This process plays a critical role in maintaining the balance of extracellular nucleotides, which are involved in various physiological processes, incl…	DEP
PARVA	Can you tell me the function of the protein "PARVA" (Alpha-parvin) of human?	The protein PARVA, also known as Alpha-parvin, is a cytoplasmic protein that plays a crucial role in cell adhesion and cytoskeletal organization. PARVA is mainly found in focal adhesions, which are sites of cell attachment to the extracellular matrix. It helps in the maintenance of cellular shape, cell migration, and wound healing. PARVA also interacts with other proteins in the cell such as inte…	DEP
IGHM	Can you tell me the function of the protein "IGHM" (Immunoglobulin heavy constant mu) of human?	The protein IGHM is a component of immunoglobulin M (IgM), which is a type of antibody produced by B cells in response to an infection. The function of IgM is to recognize and bind to specific pathogens or foreign molecules, which then activates other parts of the immune system to eliminate the threat. The IGHM protein serves as the constant region of the mu chain of IgM, providing structural sta…	DEP
SETSIP	Can you tell me the function of the protein "SETSIP" (Protein SETSIP) of human?	I'm sorry, but as an AI language model, I cannot find any information about the protein "SETSIP." It is possible that the protein does not exist or has not been extensively studied yet. Can you please provide additional information or context?	DEP
SET	Can you tell me the function of the protein "SET" (Protein SET) of human?	SET is a multifunctional protein that plays a role in various cellular processes, including chromatin remodeling, DNA repair, protein degradation, and apoptosis. It is involved in the regulation of gene expression, cell cycle progression, and cell survival. Its main function is believed to be the inhibition of protein phosphatase 2A, a key regulator of cell signaling pathways. Additionally, SET h…	DEP
TCERG1	Can you tell me the function of the protein "TCERG1" (Transcription elongation regulator 1) of human?	The protein TCERG1 is a transcription elongation regulator that is present in human cells. It is involved in the regulation of gene expression by controlling the elongation phase of transcription. TCERG1 interacts with RNA polymerase II and other transcription factors to regulate the transcription of target genes. It also facilitates the splicing of pre-mRNA and participates in the maturation of …	DEP
TAP2	Can you tell me the function of the protein "TAP2" (Antigen peptide transporter 2) of human?	The TAP2 (Antigen peptide transporter 2) protein of human is involved in the transport of peptides from the cytoplasm into the endoplasmic reticulum (ER) lumen for presentation to major histocompatibility complex (MHC) class I molecules. This process is essential for the recognition of infected or abnormal cells by the immune system. TAP2 works in conjunction with TAP1, forming a heterodimeric tr…	DEP
ANTXR2	Can you tell me the function of the protein "ANTXR2" (Anthrax toxin receptor 2) of human?	The protein ANTXR2 (Anthrax toxin receptor 2) of human is a receptor protein that binds to the protective antigen (PA) of anthrax toxin. This binding allows for the delivery of the lethal factor and edema factor components of the toxin to the cytosol of host cells, leading to cell death and tissue damage. ANTXR2 is expressed in a variety of tissues, including liver, kidney, lung, and spleen, and …	DEP
CAVIN1	Can you tell me the function of the protein "CAVIN1" (Caveolae-associated protein 1) of human?	CAVIN1 is a protein found in cells that play an important role in the formation and maintenance of caveolae, which are small invaginations on the surface of cells involved in various cellular processes such as signal transduction, cholesterol metabolism, and endocytosis. CAVIN1 acts as a scaffold protein that interacts with other proteins to promote the formation of caveolae and plays a critical …	DEP
EZR	Can you tell me the function of the protein "EZR" (Ezrin) of human?	The protein EZR (Ezrin) plays a crucial role in cytoskeleton organization and cell membrane signaling. It acts as a linker between the cytoskeleton and the plasma membrane and helps in the organization of microvilli and filopodia. Moreover, it is also involved in cell adhesion, migration, and invasion. EZR has been implicated in various human diseases, including cancer, where it may promote metas…	DEP
PRPF38B	Can you tell me the function of the protein "PRPF38B" (Pre-mRNA-splicing factor 38B) of human?	The protein "PRPF38B" is a component of the spliceosome, which is a complex biomolecular machinery responsible for the removal of introns and the splicing of exons during the maturation of pre-mRNA into mRNA. PRPF38B is specifically involved in the recognition and binding of the branch site sequence in introns, which is an important step in the splicing process. Mutations in PRPF38B have been ass…	DEP
MRC2	Can you tell me the function of the protein "MRC2" (C-type mannose receptor 2) of human?	The protein MRC2 (C-type mannose receptor 2) of human is a type of receptor that plays a role in recognizing and binding to certain molecules, in particular, hyaluronan or hyaluronic acid. It is involved in various physiological processes such as cell adhesion, migration, and morphogenesis. Additionally, MRC2 assists in the clearance of glycoproteins from the extracellular matrix and is implicate…	DEP
PLPP3	Can you tell me the function of the protein "PLPP3" (Phospholipid phosphatase 3) of human?	The protein PLPP3, also known as phospholipid phosphatase 3, is an enzyme that plays a crucial role in lipid metabolism. Specifically, it catalyzes the dephosphorylation of phosphatidic acid and lysophosphatidic acid, two important signaling molecules involved in various cellular processes such as inflammation, cell growth, and differentiation. PLPP3 is expressed in various tissues throughout the…	DEP
TLN1	Can you tell me the function of the protein "TLN1" (Talin-1) of human?	The protein TLN1 (Talin-1) of human is involved in the regulation of cell adhesion, migration, and signaling. It serves as a scaffold for other proteins, linking integrins to actin filaments and allowing cells to adhere and migrate on extracellular matrix proteins. TLN1 is also involved in the regulation of cell signaling pathways, including those that control cell proliferation and apoptosis. Ad…	DEP
DPYSL3	Can you tell me the function of the protein "DPYSL3" (Dihydropyrimidinase-related protein 3) of human?	DPYSL3 is a protein that is primarily involved in neuronal development and function. It is also known as CRMP4, which stands for collapsin response mediator protein 4. DPYSL3 plays a critical role in the proper formation of axons, the long projections of neurons that transmit signals to other cells. Specifically, DPYSL3 helps regulate the growth and guidance of axons during development and ensure…	DEP
IGLV3-10	Can you tell me the function of the protein "IGLV3-10" (Immunoglobulin lambda variable 3-10) of human?	The protein IGLV3-10 is a part of the immunoglobulin lambda variable 3-10 protein family, which plays a role in the antigen recognition and binding by antibodies in the immune system. These proteins make up the variable region of immunoglobulins, which are crucial for the specific recognition of antigens during an immune response. Therefore, the function of IGLV3-10 is to contribute to the divers…	DEP
NID1	Can you tell me the function of the protein "NID1" (Nidogen-1) of human?	The protein NID1 (Nidogen-1) plays a role in the formation and maintenance of extracellular matrix, which is the structure that supports cells in tissues and organs. NID1 is involved in the binding of cells to the extracellular matrix and the organization of tissues during development. It also has a role in angiogenesis, the formation of new blood vessels, and in tissue repair after injury. In ad…	DEP
ABCA8	Can you tell me the function of the protein "ABCA8" (ATP-binding cassette sub-family A member 8) of human?	The function of the protein ABCA8 (ATP-binding cassette sub-family A member 8) of humans is not well understood. However, studies suggest that it may play a role in lipid transport and metabolism, as well as in the regulation of cellular cholesterol and phospholipid homeostasis. Additionally, it has been suggested that ABCA8 may have a role in Alzheimer's disease and other neurodegenerative disor…	DEP
SLC9A3R2	Can you tell me the function of the protein "SLC9A3R2" (Na(+)/H(+) exchange regulatory cofactor NHE-RF2) of human?	The protein SLC9A3R2 (Na(+)/H(+) exchange regulatory cofactor NHE-RF2) regulates the activity of the Na(+)/H(+) exchanger (NHE), a membrane transporter that catalyzes the exchange of sodium and protons across the plasma membrane. It acts as a scaffolding protein that interacts with multiple signaling and membrane proteins to form functional complexes that regulate NHE activity in response to chan…	DEP
TMEM245	Can you tell me the function of the protein "TMEM245" (Transmembrane protein 245) of human?	As an AI language model, I do not have access to the most recent research on the function of TMEM245. However, according to preliminary studies, TMEM245 has been identified as a transmembrane protein that may play a role in the regulation of calcium signaling and intracellular pH homeostasis in human cells. Further research is needed to confirm this function and investigate any possible therapeut…	DEP
GSTM2	Can you tell me the function of the protein "GSTM2" (Glutathione S-transferase Mu 2) of human?	The protein GSTM2 (Glutathione S-transferase Mu 2) is involved in the detoxification of various xenobiotics and endogenous compounds by conjugation with glutathione. It belongs to the GST superfamily of enzymes, which are important in the metabolism of xenobiotics and the protection of cells against oxidative stress, as well as in the regulation of signal transduction pathways. Specifically, GSTM…	DEP
APCS	Can you tell me the function of the protein "APCS" (Serum amyloid P-component) of human?	The function of APCS (Serum amyloid P-component) is to act as a universal serum protein that binds to and removes aggregated/damaged proteins from circulation. It also helps to promote phagocytosis and clearance of apoptotic cells. Additionally, it plays a role in inflammation and immune response.	DEP
SLC25A13	Can you tell me the function of the protein "SLC25A13" (Calcium-binding mitochondrial carrier protein Aralar2) of human?	The protein SLC25A13, also known as Calcium-binding mitochondrial carrier protein Aralar2, is involved in the transport of two important molecules, namely, glutamate and aspartate, across the inner membrane of mitochondria. Specifically, SLC25A13 functions as an antiporter, exchanging cytosolic glutamate or aspartate with mitochondrial glutamate or aspartate. This transport activity is essential …	DEP
SUN1	Can you tell me the function of the protein "SUN1" (SUN domain-containing protein 1) of human?	The protein SUN1 (SUN domain-containing protein 1) plays a role in the formation and maintenance of the nuclear envelope, which encloses the genetic material of the cell. This protein participates in the anchoring of the nucleus to the cytoskeleton and in the transmission of mechanical forces between the cytoskeleton and nucleoskeleton. It is also involved in the regulation of chromosome movement…	DEP
KRR1	Can you tell me the function of the protein "KRR1" (KRR1 small subunit processome component homolog) of human?	The KRR1 protein is a component of the small subunit (SSU) processome, which is a large ribonucleoprotein complex involved in the early stages of ribosome biogenesis. KRR1 is specifically involved in the maturation and assembly of the 18S ribosomal RNA (rRNA) subunit, which is a crucial component of the ribosome. KRR1 has also been implicated in the regulation of cell growth and proliferation, an…	DEP
CDIPT	Can you tell me the function of the protein "CDIPT" (CDP-diacylglycerol--inositol 3-phosphatidyltransferase) of human?	The CDIPT protein (CDP-diacylglycerol--inositol 3-phosphatidyltransferase) is an enzyme that plays a crucial role in the biosynthesis of the phospholipid phosphatidylinositol (PI). PI is a critical component of cellular membranes that is involved in various cellular processes, including signal transduction, cell migration, and phagocytosis. CDIPT catalyzes the transfer of inositol from phosphatid…	DEP
GNA11	Can you tell me the function of the protein "GNA11" (Guanine nucleotide-binding protein subunit alpha-11) of human?	The protein GNA11 (Guanine nucleotide-binding protein subunit alpha-11) is a subunit of a G protein complex that enables the transduction of extracellular signals into intracellular responses. Specifically, GNA11 is involved in the signaling pathways of G protein-coupled receptors (GPCRs) that activate phospholipase C-beta (PLC-beta). This signaling pathway leads to the activation of diacylglycer…	DEP
SNRPC	Can you tell me the function of the protein "SNRPC" (U1 small nuclear ribonucleoprotein C) of human?	SNRPC is a component of the U1 small nuclear ribonucleoprotein complex, which plays a crucial role in pre-mRNA splicing. SNRPC specifically binds to the 5' splice site of pre-mRNA and helps to recruit other splicing factors to the site. It is involved in the recognition of the intron-exon boundaries and is essential for the proper splicing of pre-mRNA molecules. Mutations in the SNRPC gene have b…	DEP
IGHV5-10-1	Can you tell me the function of the protein "IGHV5-10-1" (Immunoglobulin heavy variable 5-10-1) of human?	The protein "IGHV5-10-1" is a variable region of the heavy chain of an antibody and is involved in the immune system's response to foreign antigens. Specifically, it plays a role in recognizing and binding to specific antigens, leading to the destruction or removal of the antigen from the body. The exact function of this particular antibody is not known as it depends on the context in which it is…	DEP
SRSF9	Can you tell me the function of the protein "SRSF9" (Serine/arginine-rich splicing factor 9) of human?	The protein SRSF9 (Serine/arginine-rich splicing factor 9) of human is a splicing factor that plays a role in alternative splicing of pre-mRNA. It is involved in the regulation of gene expression by selecting specific splice sites, which can result in different isoforms of a protein being produced, and is important for the normal development and function of cells. SRSF9 has been implicated in var…	DEP
LMNA	Can you tell me the function of the protein "LMNA" (Prelamin-A/C) of human?	The LMNA (prelamin-A/C) protein is involved in maintaining the stability and shape of the nucleus in human cells. It also plays a role in regulating gene expression and cell differentiation. Mutations in the LMNA gene have been linked to several diseases, including muscular dystrophy, progeria, and various forms of cardiomyopathy.	DEP
ABCA9	Can you tell me the function of the protein "ABCA9" (ATP-binding cassette sub-family A member 9) of human?	The function of the protein "ABCA9" (ATP-binding cassette sub-family A member 9) of human is still not completely understood, but it has been suggested that it plays a role in lipid transport and cholesterol metabolism. It is primarily expressed in macrophages and certain tissues like the liver, heart, and kidney. Some studies have also suggested that ABCA9 is involved in immune system regulation…	DEP
RPA3	Can you tell me the function of the protein "RPA3" (Replication protein A 14 kDa subunit) of human?	The protein RPA3, also known as Replication Protein A 14 kDa Subunit, is a component of the Replication Protein A (RPA) complex, which is involved in DNA replication and repair. RPA3 plays a crucial role in regulating the stability and function of the RPA complex, which binds single-stranded DNA in order to protect it from degradation and facilitate DNA replication and repair. RPA3 is essential f…	DEP
RPS6KA1	Can you tell me the function of the protein "RPS6KA1" (Ribosomal protein S6 kinase alpha-1) of human?	The protein RPS6KA1 (Ribosomal protein S6 kinase alpha-1), also known as RSK1, is a member of the AGC kinase family and is involved in many cellular processes such as cell growth, division, differentiation, and survival. RPS6KA1 is a Serine/Threonine-protein kinase and is activated by various stimuli including growth factors, stress signals, and hormones. RPS6KA1 regulates protein synthesis by ph…	DEP
GALE	Can you tell me the function of the protein "GALE" (UDP-glucose 4-epimerase) of human?	The protein GALE (UDP-glucose 4-epimerase) in humans is responsible for catalyzing the interconversion of UDP-galactose and UDP-glucose, which are important for various biological processes including cell wall synthesis, glycoprotein and glycolipid metabolism, and the biosynthesis of certain important molecules such as lactose and hyaluronan. In essence, GALE helps to regulate sugar metabolism in…	DEP
HSPH1	Can you tell me the function of the protein "HSPH1" (Heat shock protein 105 kDa) of human?	The HSPH1 protein, also known as heat shock protein 105 kDa, is a member of the HSP110 family of heat shock proteins. Its main function is to assist in the folding and unfolding of proteins, protect cells from heat stress and other environmental stresses, and promote cellular survival under stress conditions. Furthermore, HSPH1 has been shown to be involved in the regulation of protein transport …	DEP
LMNB1	Can you tell me the function of the protein "LMNB1" (Lamin-B1) of human?	The protein LMNB1 (Lamin-B1) is a structural component of the nuclear lamina, which is a network of intermediate filaments that provides structural support to the nuclear envelope. LMNB1 helps to maintain the integrity of the nucleus, regulates gene expression and DNA replication, and is involved in various cellular processes such as cell division and differentiation. Mutations in LMNB1 have been…	DEP
GNPDA2	Can you tell me the function of the protein "GNPDA2" (Glucosamine-6-phosphate isomerase 2) of human?	The protein GNPDA2 is also known as Glucosamine-6-phosphate isomerase 2, and its function in humans is to catalyze the reversible isomerization of glucosamine 6-phosphate to fructose 6-phosphate, a key step in the hexosamine biosynthesis pathway. This pathway is important for the production of essential molecules like glycosaminoglycans, glycolipids, and glycoproteins, all of which are necessary …	DEP
CD151	Can you tell me the function of the protein "CD151" (CD151 antigen) of human?	CD151 (CD151 antigen) is a transmembrane protein that is a part of the tetraspanin family. It is known to interact with integrin proteins and to play a crucial role in regulating cell adhesion, migration, and invasion. CD151 is also involved in the formation and stability of cell-cell adhesions and is essential for the integrity of the endothelial barrier in blood vessels. Dysregulation of CD151 …	DEP
BTD	Can you tell me the function of the protein "BTD" (Biotinidase) of human?	Biotinidase (BTD) is an enzyme in humans that plays an essential role in the metabolism of biotin, a B-vitamin. BTD cleaves biotin from dietary sources, allowing it to be absorbed and utilized by the body. It also recycles biotin from biocytin, a metabolite of several biotin-dependent enzymes. Without BTD, biotin deficiency can occur leading to symptoms such as skin rash, hair loss, and neurologi…	DEP
IFIH1	Can you tell me the function of the protein "IFIH1" (Interferon-induced helicase C domain-containing protein 1) of human?	The protein "IFIH1" (Interferon-induced helicase C domain-containing protein 1) of human is involved in innate immunity and is a sensor for viral RNA in infected cells. It is responsible for recognizing and binding to viral RNA, which leads to the activation of downstream signaling pathways that induce the production of interferons and other antiviral proteins. Thus, IFIH1 plays a critical role i…	DEP
HNRNPF	Can you tell me the function of the protein "HNRNPF" (Heterogeneous nuclear ribonucleoprotein F) of human?	The HNRNPF protein in humans is involved in a variety of functions related to RNA metabolism. It is specifically known to bind to RNA molecules and participate in gene expression regulation, RNA processing, and mRNA splicing. Additionally, HNRNPF has been reported to interact with several other proteins involved in RNA processing, suggesting its role in coordinating and regulating complex cellula…	DEP
LAMC1	Can you tell me the function of the protein "LAMC1" (Laminin subunit gamma-1) of human?	The protein LAMC1 (Laminin subunit gamma-1) of human is a component of laminin, a major component of the extracellular matrix (ECM) which is involved in cell adhesion, migration and differentiation. LAMC1 plays a critical role in the basement membrane assembly and maintenance, and also serves as a ligand for integrin receptors which are involved in cell signaling, survival, and proliferation. Add…	DEP
TFRC	Can you tell me the function of the protein "TFRC" (Transferrin receptor protein 1) of human?	The function of the protein "TFRC" is to bind to transferrin, a protein that binds to and transports iron in the body. This binding allows cells to take up iron and use it for various metabolic processes. TFRC is particularly important for the uptake of iron in cells that have high demand for it, such as red blood cell precursors and rapidly dividing cells.	DEP
TFR2	Can you tell me the function of the protein "TFR2" (Transferrin receptor protein 2) of human?	The function of the protein TFR2 is to regulate iron metabolism in the body. It is involved in the uptake of iron from transferrin, a protein that carries iron in the blood, into cells. TFR2 is mainly expressed in the liver and plays a role in the regulation of hepcidin, a hormone that controls the level of iron in the body. It is also involved in the proper functioning of erythropoiesis, the pro…	DEP
ADH5	Can you tell me the function of the protein "ADH5" (Alcohol dehydrogenase class-3) of human?	The function of the protein ADH5 in humans is to catalyze the conversion of alcohol (ethanol) to acetaldehyde. It belongs to the class III of the Alcohol dehydrogenase family and is primarily expressed in the liver. This enzyme plays a crucial role in the metabolism of ethanol and other alcohols, and its dysfunction can lead to alcohol intolerance and susceptibility to alcoholic liver disease.	DEP
EPS8	Can you tell me the function of the protein "EPS8" (Epidermal growth factor receptor kinase substrate 8) of human?	The protein EPS8 is involved in several cellular processes, including actin cytoskeleton rearrangement, cell migration, adhesion, and proliferation. As an epidermal growth factor receptor kinase substrate, it also plays a role in the regulation of cell growth and differentiation. Additionally, EPS8 has been implicated in the pathogenesis of certain human diseases, including cancer and neurologica…	DEP
PML	Can you tell me the function of the protein "PML" (Protein PML) of human?	The protein PML (promyelocytic leukemia protein) serves various functions in the human body, including regulating gene expression, enhancing the cell cycle checkpoint, promoting DNA repair, and maintaining genomic stability. Additionally, PML plays an important role in the formation of structures called PML nuclear bodies, which are involved in numerous cellular processes such as stress responses…	DEP
NRDC	Can you tell me the function of the protein "NRDC" (Nardilysin) of human?	The protein NRDC (Nardilysin) of humans has various functions, including	DEP
SF3B1	Can you tell me the function of the protein "SF3B1" (Splicing factor 3B subunit 1) of human?	SF3B1 is a protein that plays a role in the process of pre-mRNA splicing, a process by which the initial RNA transcript is converted into the mature messenger RNA (mRNA). More specifically, SF3B1 is a subunit of the splicing factor 3B complex, which is involved in the recognition of the branch site sequence during spliceosome assembly. Mutations in SF3B1 are associated with various forms of cance…	DEP
SUB1	Can you tell me the function of the protein "SUB1" (Activated RNA polymerase II transcriptional coactivator p15) of human?	The protein SUB1 (Activated RNA polymerase II transcriptional coactivator p15) of human is a transcription coactivator that plays a role in the regulation of RNA polymerase II-dependent transcription. It interacts with the basal transcription machinery and enhances the binding of RNA polymerase II to promoter DNA. It is also involved in the recruitment of other transcription factors to the promot…	DEP
F11R	Can you tell me the function of the protein "F11R" (Junctional adhesion molecule A) of human?	The protein F11R (Junctional adhesion molecule A) of human is involved in various cellular processes including cell-cell adhesion, inflammation, and immune response. It is a transmembrane protein that is located in the tight junctions of endothelial, epithelial and neuronal cells. F11R is involved in the formation and maintenance of tight junctions and is also known to interact with various immun…	DEP
ERP29	Can you tell me the function of the protein "ERP29" (Endoplasmic reticulum resident protein 29) of human?	Yes, ERP29 is an endoplasmic reticulum (ER) resident protein that is involved in protein folding and quality control. It assists in the proper folding and maturation of newly synthesized proteins that are transported to the ER for secretion, are integrated into the plasma membrane or are destined for lysosomal degradation. ERP29's chaperone-like function ensures that these proteins are properly f…	DEP
AKAP8	Can you tell me the function of the protein "AKAP8" (A-kinase anchor protein 8) of human?	The AKAP8 protein, also known as A-kinase anchor protein 95 (AKAP95), plays a significant role in the regulation of DNA replication and repair processes. It anchors protein kinase A (PKA) and cyclin-dependent kinase 1 (CDK1) to chromatin during mitosis and meiosis, thereby ensuring accurate segregation of chromosomes during cell division. AKAP8 is also involved in the recruitment of repair factor…	DEP
PRPF38A	Can you tell me the function of the protein "PRPF38A" (Pre-mRNA-splicing factor 38A) of human?	The protein PRPF38A is a component of the spliceosome, which is responsible for removing introns and joining exons during mRNA processing. Specifically, PRPF38A is involved in the formation and stabilization of the U4/U6.U5 tri-snRNP complex, which is critical for spliceosome assembly and function. Therefore, PRPF38A plays a crucial role in pre-mRNA splicing, which is necessary for generating mat…	DEP
ITGA1	Can you tell me the function of the protein "ITGA1" (Integrin alpha-1) of human?	The protein ITGA1 (Integrin alpha-1) is a cell surface receptor protein that is involved in cell adhesion and migration. Specifically, it interacts with extracellular matrix proteins such as collagen to promote cell attachment and signaling. It plays a role in various physiological processes, including embryonic development, wound healing, and tissue repair. It has also been implicated in certain…	DEP
UBE2L6	Can you tell me the function of the protein "UBE2L6" (Ubiquitin/ISG15-conjugating enzyme E2 L6) of human?	The function of UBE2L6 protein is to catalyze the conjugation of ubiquitin or ISG15 to target proteins, promoting their degradation or modifying their function. Specifically, UBE2L6 is an ubiquitin-conjugating enzyme (E2) that participates in the ubiquitin-proteasome pathway, which plays a crucial role in the selective degradation of damaged, misfolded or unwanted cellular proteins. Additionally,…	DEP
CRMP1	Can you tell me the function of the protein "CRMP1" (Dihydropyrimidinase-related protein 1) of human?	CRMP1 (Dihydropyrimidinase-related protein 1) of human is a cytosolic phosphoprotein that plays a critical role in neuronal development and axonal guidance. It is involved in the regulation of microtubule dynamics, which is essential for neurite outgrowth and guidance. CRMP1 is also involved in the regulation of ion channels and interacts with several factors that are necessary for axonal pathfin…	DEP
C4BPA	Can you tell me the function of the protein "C4BPA" (C4b-binding protein alpha chain) of human?	The C4b-binding protein alpha chain (C4BPA) of human is a protein that binds to the complement protein C4b, which is a component of the immune system. C4BPA is involved in regulating the complement system, which helps to protect the body against pathogens. The binding of C4BPA to C4b helps to prevent the formation of the membrane attack complex (MAC), which damages host cells along with foreign i…	DEP
ASPA	Can you tell me the function of the protein "ASPA" (Aspartoacylase) of human?	ASPA is an enzyme that plays a critical role in the breakdown of a neurotransmitter called N-acetylaspartate (NAA) in the brain. NAA is found mainly in neurons and is involved in the maintenance of healthy brain cells. ASPA helps to break down NAA into acetate and aspartate, which can then be recycled for other cellular processes. Mutations in the ASPA gene can lead to a rare genetic disorder cal…	DEP
MAP1A	Can you tell me the function of the protein "MAP1A" (Microtubule-associated protein 1A) of human?	MAP1A is a microtubule-associated protein that is instrumental in stabilizing the microtubule network in cells. It plays a crucial role in axon development and neurite extension, and it also connects microtubules to other cytoskeletal elements. Defects in MAP1A have been linked to a range of neurological disorders, including Huntington's disease, Alzheimer's disease, and Parkinson's disease.	DEP
SCP2	Can you tell me the function of the protein "SCP2" (Non-specific lipid-transfer protein) of human?	The protein SCP2, also known as Non-specific lipid-transfer protein, plays a role in the transport and metabolism of lipids (fats) within cells. It has been shown to bind to a wide variety of lipids, including cholesterol, phospholipids, and fatty acids, and may be involved in shuttling these molecules between cellular compartments or in regulating their storage and utilization. SCP2 has also bee…	DEP
SMC4	Can you tell me the function of the protein "SMC4" (Structural maintenance of chromosomes protein 4) of human?	The protein SMC4 is a component of a protein complex known as cohesin, which plays a critical role in the maintenance of chromosome structure and organization. Specifically, SMC4 is involved in the establishment and maintenance of sister chromatid cohesion, which is essential for accurate chromosome segregation during cell division. Additionally, SMC4 has also been implicated in DNA repair and ge…	DEP
GSTM3	Can you tell me the function of the protein "GSTM3" (Glutathione S-transferase Mu 3) of human?	The protein GSTM3 (Glutathione S-transferase Mu 3) of human is an enzyme that belongs to the glutathione S-transferase family. It plays a crucial role in the detoxification process of xenobiotics (such as environmental toxins, drugs, and carcinogens) by catalyzing the conjugation of glutathione to electrophilic centers on these compounds, thus facilitating their removal from the body. GSTM3 is pr…	DEP
ACTA2	Can you tell me the function of the protein "ACTA2" (Actin, aortic smooth muscle) of human?	The protein "ACTA2" is also known as smooth muscle actin, and it is responsible for the formation and contraction of smooth muscle cells in the aortic wall. ACTA2 plays a crucial role in regulating the tone and elasticity of blood vessels, as well as providing structural support for the aorta. Mutations in the ACTA2 gene can lead to various cardiovascular diseases, such as aortic aneurysms and di…	DEP
JMJD6	Can you tell me the function of the protein "JMJD6" (Bifunctional arginine demethylase and lysyl-hydroxylase JMJD6) of human?	The protein JMJD6 (Bifunctional arginine demethylase and lysyl-hydroxylase JMJD6) plays multiple roles in different cellular processes. It is involved in RNA processing, regulation of gene expression, and splicing. JMJD6 also participates in the regulation of cellular senescence, DNA damage response, and apoptosis. Its lysyl-hydroxylase activity is important for the formation of collagen and elas…	DEP
CSPG4	Can you tell me the function of the protein "CSPG4" (Chondroitin sulfate proteoglycan 4) of human?	Yes, the protein CSPG4 (Chondroitin sulfate proteoglycan 4) of human has multiple functions. It is primarily found on the cell surface and is involved in various cellular processes. Some of the functions of CSPG4 include	DEP
TGFBR3	Can you tell me the function of the protein "TGFBR3" (Transforming growth factor beta receptor type 3) of human?	The function of TGFBR3 is to act as a co-receptor in the transforming growth factor-beta (TGF-beta) signaling pathway. It binds to TGF-beta ligands and enhances their binding to the TGF-beta receptor, resulting in downstream signaling events. TGFBR3 is also involved in the regulation of cell growth, differentiation, and embryonic development. Additionally, it has been implicated in various diseas…	DEP
HSPB7	Can you tell me the function of the protein "HSPB7" (Heat shock protein beta-7) of human?	The exact function of HSPB7 is not fully understood, but it is believed to play a protective role in the heart by preventing damage to cardiac cells during times of stress or injury. Additionally, it may be involved in regulating the contraction and relaxation of heart muscle cells.	DEP
VAMP2	Can you tell me the function of the protein "VAMP2" (Vesicle-associated membrane protein 2) of human?	Yes, as an AI language model, I can tell you that the protein VAMP2, also known as synaptobrevin-2, is a membrane protein that plays an essential role in synaptic vesicle fusion and neurotransmitter release in the central nervous system of humans. It interacts with other proteins such as syntaxin and SNAP-25 to form the SNARE complex, which facilitates the docking and fusion of synaptic vesicles …	DEP
SAR1B	Can you tell me the function of the protein "SAR1B" (GTP-binding protein SAR1b) of human?	The protein SAR1B is involved in the process of transport of proteins and lipids between different compartments within cells. Specifically, SAR1B is a GTP-binding protein that plays a key role in the formation of transport vesicles that bud off from the endoplasmic reticulum (ER) and move towards the Golgi apparatus. This process, known as COPII-mediated vesicular transport, is essential for the …	DEP
DHCR24	Can you tell me the function of the protein "DHCR24" (Delta(24)-sterol reductase) of human?	The DHCR24 protein in humans is also known as Delta(24)-sterol reductase. Its function is to produce cholesterol by converting desmosterol (a precursor of cholesterol) into cholesterol in the last step of the cholesterol biosynthesis pathway. Cholesterol is an essential component of cell membranes and is required for the synthesis of vital molecules such as hormones and bile acids. DHCR24 also ha…	DEP
WFS1	Can you tell me the function of the protein "WFS1" (Wolframin) of human?	The protein WFS1 (Wolframin) is involved in maintaining the health and function of various organs in the human body, including the pancreas, brain, and eyes. Specifically, it plays a crucial role in regulating the release of insulin from pancreatic beta cells, protecting the neurons of the brain from degeneration, and maintaining the health of the retina. Mutations in the WFS1 gene have been link…	DEP
ACTG2	Can you tell me the function of the protein "ACTG2" (Actin, gamma-enteric smooth muscle) of human?	The protein ACTG2 (Actin, gamma-enteric smooth muscle) is responsible for providing structure and contraction to smooth muscle tissues in the gastrointestinal tract. It forms part of the cytoskeleton of smooth muscle cells, which are specialized cells that line the inner walls of organs like the stomach, intestines, and bladder. The contraction of smooth muscle tissue also helps move food and was…	DEP
ISOC1	Can you tell me the function of the protein "ISOC1" (Isochorismatase domain-containing protein 1) of human?	The protein ISOC1 (Isochorismatase domain-containing protein 1) is involved in the metabolism of various compounds like salicylic acid and benzoic acid. It serves as an isochorismatase-like enzyme that cleaves isochorismate, a precursor for the biosynthesis of siderophores in bacteria, into 2,3-dihydroxybenzoate and pyruvate. It has also been shown to have a role in immune response, inflammation,…	DEP
RPRD1B	Can you tell me the function of the protein "RPRD1B" (Regulation of nuclear pre-mRNA domain-containing protein 1B) of human?	The exact function of RPRD1B is not well-established in humans. However, it is known that RPRD1B belongs to a family of proteins that regulate gene expression during transcription. It is also suggested that RPRD1B may be involved in RNA splicing and processing. Further research is required to fully understand the function of RPRD1B in human biology.	DEP
HAAO	Can you tell me the function of the protein "HAAO" (3-hydroxyanthranilate 3,4-dioxygenase) of human?	The protein HAAO, also known as 3-hydroxyanthranilate 3,4-dioxygenase, is an enzyme that catalyzes the conversion of 3-hydroxyanthranilate to quinolinic acid, which is a precursor of the neurotransmitter NMDA (N-methyl-D-aspartate). This protein is involved in the kynurenine pathway, which is responsible for the degradation of the amino acid tryptophan. It plays a critical role in regulating the …	DEP
KRT1	Can you tell me the function of the protein "KRT1" (Keratin, type II cytoskeletal 1) of human?	KRT1, also known as keratin 1, is a protein that plays an important role in the formation and maintenance of the skin barrier. It is a component of keratinocytes, the epithelial cells that make up the outermost layer of the skin. KRT1 helps to provide structural support to the skin, protecting it from damage caused by external factors such as UV radiation and chemicals. It also helps to regulate …	DEP
ACOX1	Can you tell me the function of the protein "ACOX1" (Peroxisomal acyl-coenzyme A oxidase 1) of human?	The protein ACOX1 (Peroxisomal acyl-coenzyme A oxidase 1) of human has the function of catalyzing the first and rate-limiting step in the peroxisomal beta-oxidation of fatty acids. It oxidizes straight-chain and branched-chain acyl-CoA esters to 2-trans-enoyl-CoA intermediates, which are further processed by other enzymes to generate ATP for cellular energy metabolism. ACOX1 also plays a role in …	DEP
CCDC51	Can you tell me the function of the protein "CCDC51" (Coiled-coil domain-containing protein 51) of human?	There is currently limited information available about the specific function of CCDC51 in humans. However, it is predicted to be a coiled-coil domain-containing protein, which suggests that it may play a role in protein-protein interactions and the formation of protein complexes. Further research is needed to fully characterize its function.	DEP
PDXDC2P	Can you tell me the function of the protein "PDXDC2P" (Putative pyridoxal-dependent decarboxylase domain-containing protein 2) of human?	The exact function of PDXDC2P in humans is not well known or characterized. However, based on its name "Putative pyridoxal-dependent decarboxylase domain-containing protein 2", it is predicted to contain a domain involved in decarboxylation reactions that require the co-factor pyridoxal. Therefore, it is suggested that PDXDC2P may be involved in catalyzing such decarboxylation reactions. However,…	DEP
PDXDC1	Can you tell me the function of the protein "PDXDC1" (Pyridoxal-dependent decarboxylase domain-containing protein 1) of human?	The function of PDXDC1 (Pyridoxal-dependent decarboxylase domain-containing protein 1) is to act as a pyridoxal phosphate (PLP)-binding protein that catalyzes the decarboxylation of L-3,4-dihydroxyphenylalanine (L-DOPA) to dopamine in the cytoplasm. This conversion is essential for the biosynthesis of neurotransmitters such as dopamine and serotonin in the brain. Additionally, PDXDC1 may also pla…	DEP
ACSS3	Can you tell me the function of the protein "ACSS3" (Acyl-CoA synthetase short-chain family member 3, mitochondrial) of human?	ACSS3 is a protein that belongs to the short-chain acyl-CoA synthetase family and is found in the mitochondria of human cells. Its primary function is to activate short-chain fatty acids by converting them into acyl-CoA molecules. This process is essential for the metabolism of fatty acids and the production of energy in cells. Additionally, ACSS3 has been implicated in the regulation of gene exp…	DEP
MGME1	Can you tell me the function of the protein "MGME1" (Mitochondrial genome maintenance exonuclease 1) of human?	MGME1 is a protein that plays a crucial role in the maintenance and repair of mitochondrial DNA in human cells. Specifically, it functions as an exonuclease, meaning it is involved in the degradation of RNA and DNA within the mitochondria. Without functional MGME1, there can be an accumulation of damaged DNA and impaired mitochondrial function, which can lead to a variety of diseases and disorder…	DEP
HNRNPAB	Can you tell me the function of the protein "HNRNPAB" (Heterogeneous nuclear ribonucleoprotein A/B) of human?	The protein HNRNPAB is involved in many cellular processes, including RNA processing, splicing, transport, stabilization, and translation regulation. It also plays a role in the regulation of gene expression, DNA repair, and telomere maintenance. HNRNPAB is a member of the heterogeneous nuclear ribonucleoprotein family, which is involved in the assembly of precursor messenger RNA (pre-mRNA) molec…	DEP
HNRNPL	Can you tell me the function of the protein "HNRNPL" (Heterogeneous nuclear ribonucleoprotein L) of human?	The protein HNRNPL (Heterogeneous nuclear ribonucleoprotein L), also known as hnRNP L, is involved in several functions in human cells, including splicing, transcription regulation, RNA stability, and translation. Specifically, HNRNPL binds to RNA molecules and regulates their processing and translation. It is also involved in cellular processes such as embryonic development, cellular differentia…	DEP
PRCP	Can you tell me the function of the protein "PRCP" (Lysosomal Pro-X carboxypeptidase) of human?	The PRCP protein, also known as lysosomal Pro-X carboxypeptidase, is an enzyme that is involved in the breakdown and processing of proteins within lysosomes, which are small cellular compartments involved in the degradation of various cellular components. Specifically, PRCP assists in the cleavage of terminal amino acids from protein substrates, helping to modify and prepare them for ultimate deg…	DEP
PHF6	Can you tell me the function of the protein "PHF6" (PHD finger protein 6) of human?	PHF6 is a transcriptional regulator that plays an important role in cell differentiation and development. It belongs to the PHD finger family of proteins and contains a functional domain called PHD finger that recognizes and binds to specific histone modifications. PHF6 is involved in regulating gene expression by recruiting other proteins to chromatin and influencing chromatin structure. Additio…	DEP
FAH	Can you tell me the function of the protein "FAH" (Fumarylacetoacetase) of human?	The function of the protein FAH (Fumarylacetoacetase) in humans is to break down the amino acid tyrosine, which is used in the body for the production of neurotransmitters and hormones. Without proper functioning of FAH, a condition known as hereditary tyrosinemia type 1 can occur, leading to liver and kidney damage if left untreated.	DEP
THY1	Can you tell me the function of the protein "THY1" (Thy-1 membrane glycoprotein) of human?	The THY1 protein, also known as Thy-1 membrane glycoprotein, plays a role in cell adhesion and signaling. It is found on the surface of many different types of cells, including T cells, neurons, and fibroblasts. THY1 is involved in regulating cell growth, migration, and differentiation, and may also play a role in immune system function. Additionally, abnormal expression of THY1 has been associat…	DEP
SPTA1	Can you tell me the function of the protein "SPTA1" (Spectrin alpha chain, erythrocytic 1) of human?	The protein SPTA1 (Spectrin alpha chain, erythrocytic 1) of human is an important component of the cytoskeletal network in red blood cells. It forms a part of the spectrin heterodimer, which functions to maintain the structural integrity of the red blood cell membrane by anchoring it to the cytoskeleton. SPTA1 also plays a key role in membrane stability, elasticity, and deformability, and mutatio…	DEP
C4BPB	Can you tell me the function of the protein "C4BPB" (C4b-binding protein beta chain) of human?	The C4b-binding protein beta chain (C4BPB) is a protein that plays a role in regulating the complement system, which is part of the immune response. C4BPB binds to the complement component C4b, which is a protein involved in the initiation of the complement cascade. By binding to C4b, C4BPB helps to prevent the formation of the membrane attack complex (MAC), which can damage host cells in additio…	DEP
GSTK1	Can you tell me the function of the protein "GSTK1" (Glutathione S-transferase kappa 1) of human?	The function of the protein GSTK1 (Glutathione S-transferase kappa 1) of human is to catalyze the conjugation of the reduced form of glutathione to a variety of electrophilic and hydrophobic compounds, which facilitates their excretion from the body. This process helps to protect cells from damage caused by reactive oxygen species, xenobiotics, and other toxic compounds. GSTK1 has also been impli…	DEP
RFC5	Can you tell me the function of the protein "RFC5" (Replication factor C subunit 5) of human?	The protein RFC5 is one of the subunits of Replication Factor C (RFC), a protein complex involved in DNA replication and repair. It functions as a clamp loader, responsible for loading the PCNA (proliferating cell nuclear antigen) clamp onto DNA during DNA replication and repair. The PCNA clamp is an important component of the replication and repair machinery as it helps to stabilize the DNA poly…	DEP
IGLV2-8	Can you tell me the function of the protein "IGLV2-8" (Immunoglobulin lambda variable 2-8) of human?	IGLV2-8 is a type of protein called an immunoglobulin lambda variable chain. It is part of the immune system and is involved in the production of antibodies that help the body fight off infections and harmful substances. Specifically, IGLV2-8 is one of the many variable regions on the immunoglobulin lambda light chain that determine the specificity of the antibody to bind to a specific antigen. T…	DEP
SLC4A1	Can you tell me the function of the protein "SLC4A1" (Band 3 anion transport protein) of human?	The Band 3 anion transport protein, also known as SLC4A1, is responsible for transporting bicarbonate ions across the cell membrane of red blood cells. This protein plays a critical role in maintaining the acid-base balance in the body and in regulating the exchange of gases such as oxygen and carbon dioxide between the lungs and the rest of the body. Additionally, mutations in the SLC4A1 gene ha…	DEP
CTSA	Can you tell me the function of the protein "CTSA" (Lysosomal protective protein) of human?	The protein CTSA (Lysosomal protective protein) plays a crucial role in protecting the lysosomes of human cells. It is an enzyme that cleaves off a part of a larger protein called prosaposin, forming saposins A and B. These saposins play a vital role in breaking down and digesting certain substances in the lysosome, including lipids, glycans, and glycolipids. Without CTSA, the lysosome becomes ov…	DEP
SFRP1	Can you tell me the function of the protein "SFRP1" (Secreted frizzled-related protein 1) of human?	The protein SFRP1 (Secreted frizzled-related protein 1) is a member of the SFRP family that is involved in regulating the Wnt signaling pathway. SFRP1 is a secreted protein that binds to Wnt ligands and blocks their interaction with Wnt receptors, suppressing Wnt signaling. This function of SFRP1 is important in various cellular processes, including embryonic development, tissue regeneration, and…	DEP
CPXM1	Can you tell me the function of the protein "CPXM1" (Probable carboxypeptidase X1) of human?	CPXM1 is a carboxypeptidase enzyme that plays a role in the processing and degradation of proteins. Specifically, it assists in the removal of amino acids from the C-terminus (the end of the protein) of peptides and proteins. CPXM1 may be involved in various physiological processes, including digestion, metabolism, and neural development.	DEP
PSTPIP2	Can you tell me the function of the protein "PSTPIP2" (Proline-serine-threonine phosphatase-interacting protein 2) of human?	The function of PSTPIP2 is to regulate the activity of actin filaments, which are involved in cell movement and the maintenance of cell structure. Specifically, PSTPIP2 regulates the formation of actin filaments by interacting with another protein called WASP, which is an important regulator of actin polymerization. Mutations in PSTPIP2 have been linked to a rare genetic disorder called pyogenic …	DEP
NMI	Can you tell me the function of the protein "NMI" (N-myc-interactor) of human?	The NMI protein (N-myc-interactor) in humans is involved in a variety of cellular processes, including transcriptional regulation, cell signaling, and metabolism. It acts as a transcriptional co-repressor by inhibiting the activity of certain transcription factors, including c-Myc and STAT proteins. NMI also interacts with a variety of other proteins involved in cell signaling pathways, including…	DEP
RALYL	Can you tell me the function of the protein "RALYL" (RNA-binding Raly-like protein) of human?	The specific function of RALYL is not fully understood, but it is known to be an RNA-binding protein involved in mRNA splicing and export from the nucleus. It has also been implicated in the regulation of protein synthesis and the formation of stress granules in response to cellular stress. Additionally, there is some evidence to suggest that RALYL may play a role in cancer progression and metast…	DEP
IRF6	Can you tell me the function of the protein "IRF6" (Interferon regulatory factor 6) of human?	Yes, as an AI language model, I can tell you that the protein "IRF6" (Interferon regulatory factor 6) of human is a transcription factor that plays a key role in the regulation of the immune response and embryonic development in humans. It is involved in the expression of genes that are critical for the development of the skin, mouth, and other structures in the body. It is also involved in the r…	DEP
KRT9	Can you tell me the function of the protein "KRT9" (Keratin, type I cytoskeletal 9) of human?	KRT9 is a protein that is a member of the keratin family, which is associated with the formation of intermediate filaments in cells. In particular, KRT9 is a type I cytoskeletal keratin that is expressed in the skin, hair, nails, and other types of epithelial tissues. Its main function is to provide structural support to these tissues and protect them from damage or injury. Mutations in KRT9 gene…	DEP
LIG1	Can you tell me the function of the protein "LIG1" (DNA ligase 1) of human?	Yes, as an AI language model, I can tell you that the protein "LIG1" (DNA ligase 1) of human plays a crucial role in DNA replication and repair by joining together DNA strands that have been cut or damaged. This protein is responsible for sealing the gaps that are left between Okazaki fragments during lagging strand synthesis in DNA replication. It also plays a key role in base excision repair an…	DEP
HIST1H1E	Can you tell me the function of the protein "HIST1H1E" (Histone H1.4) of human?	Yes, the Histone H1.4 protein (encoded by the HIST1H1E gene) is involved in the packaging and organization of DNA in the nucleus of human cells. Specifically, it binds to the linker DNA between nucleosomes and helps to stabilize the higher order chromatin structure. This protein is also involved in regulating gene expression and DNA repair.	DEP
HIST1H1T	Can you tell me the function of the protein "HIST1H1T" (Histone H1t) of human?	Histone H1t is a type of histone protein that is specifically expressed in testis during spermatogenesis. Its function is to help package the DNA into a tight and organized structure, allowing for the proper regulation of gene expression during cell division and differentiation. Additionally, Histone H1t has been implicated in the regulation of DNA damage repair and chromosome condensation during…	DEP
SERPINA10	Can you tell me the function of the protein "SERPINA10" (Protein Z-dependent protease inhibitor) of human?	The protein SERPINA10 or Protein Z-dependent protease inhibitor is a serine protease inhibitor that helps regulate blood clotting. It inhibits the activity of the enzyme thrombin, which is a crucial component of the coagulation cascade that is responsible for blood clotting. By regulating thrombin activity, SERPINA10 helps maintain the delicate balance between clotting and bleeding in the body, p…	DEP
HUS1	Can you tell me the function of the protein "HUS1" (Checkpoint protein HUS1) of human?	The protein HUS1 (Checkpoint protein HUS1) of human is involved in cell cycle checkpoints, which are critical for DNA repair and genomic stability. HUS1 is a member of the PCNA (proliferating cell nuclear antigen)-related protein family and forms a complex with other checkpoint proteins such as Rad9 and Rad1 to regulate DNA damage response and cell cycle arrest in response to DNA damage. HUS1 is …	DEP
DDAH1	Can you tell me the function of the protein "DDAH1" (N(G),N(G)-dimethylarginine dimethylaminohydrolase 1) of human?	The protein DDAH1 is responsible for catalyzing the hydrolysis of N(G),N(G)-dimethylarginine, which is an endogenous inhibitor of nitric oxide synthase. Therefore, DDAH1 plays a crucial role in regulating the levels of nitric oxide in the body, which is important for maintaining cardiovascular and neurological health. Additionally, DDAH1 has also been implicated in the regulation of angiogenesis,…	DEP
FANCI	Can you tell me the function of the protein "FANCI" (Fanconi anemia group I protein) of human?	The FANCI or Fanconi anemia group I protein is involved in maintaining genomic stability by promoting DNA repair and replication fork stabilization. It is a component of the Fanconi anemia (FA) pathway, which helps repair damaged DNA, prevent DNA damage-induced cell death, and maintain genomic integrity. FANCI functions in conjunction with FANCD2 to monoubiquitinate FANCI-FANCD2 complex, which in…	DEP
RAB23	Can you tell me the function of the protein "RAB23" (Ras-related protein Rab-23) of human?	RAB23 is a protein that is involved in the regulation of intracellular vesicular trafficking, which involves the movement of molecules between different compartments within cells. Specifically, RAB23 is a member of the RAB family of small GTPases that plays a role in the trafficking of proteins and lipids between the Golgi complex and the endoplasmic reticulum. Additionally, RAB23 has been implic…	DEP
PRDX2	Can you tell me the function of the protein "PRDX2" (Peroxiredoxin-2) of human?	PRDX2 is a protein that belongs to the peroxiredoxin family and is found in humans. It has a function in regulating antioxidant activities in cells in order to protect them from oxidative stress. Specifically, PRDX2 acts as a reducing agent to catalyze the breakdown of hydrogen peroxide and peroxynitrite, which are harmful reactive oxygen species (ROS) that can cause cellular damage. Additionally…	DEP
ITGB3	Can you tell me the function of the protein "ITGB3" (Integrin beta-3) of human?	Integrin beta-3 (ITGB3) is a protein that is involved in cell adhesion and signaling. It is found on the surface of many different types of cells, including platelets, endothelial cells, and immune cells.In platelets, ITGB3 forms a complex with the alpha-IIb integrin subunit to create the glycoprotein complex known as GPIIb/IIIa or alphaIIbβ3. This complex plays a critical role in platelet aggreg…	DEP
BDH2	Can you tell me the function of the protein "BDH2" (3-hydroxybutyrate dehydrogenase type 2) of human?	The function of the protein BDH2 (3-hydroxybutyrate dehydrogenase type 2) in humans is to catalyze the conversion of 3-hydroxybutyrate (a ketone body) into acetoacetate, which can then be further metabolized to produce ATP (the primary source of cellular energy). This enzyme is primarily expressed in the liver and kidney, and plays a crucial role in maintaining energy homeostasis during periods o…	DEP
GINS3	Can you tell me the function of the protein "GINS3" (DNA replication complex GINS protein PSF3) of human?	GINS3, also known as DNA replication complex GINS protein PSF3, is a protein that participates in DNA replication by assisting in the formation of the replication fork. It is a subunit of the GINS complex (GINS1, GINS2, GINS3, and GINS4), which interacts with the replication machinery and helps to stabilize and maintain the replication fork during DNA synthesis. GINS3 is specifically involved in …	DEP
ISG20	Can you tell me the function of the protein "ISG20" (Interferon-stimulated gene 20 kDa protein) of human?	The ISG20 protein is an interferon-stimulated ribonuclease that plays a role in the innate immune response to viral infection. It is able to degrade RNA molecules, including both single-stranded and double-stranded RNA viruses, and acts as a potent antiviral agent. Additionally, ISG20 has been shown to have a role in regulating cellular apoptosis and proliferation.	DEP
MAGOHB	Can you tell me the function of the protein "MAGOHB" (Protein mago nashi homolog 2) of human?	MAGOHB, also known as Mago Nashi Homolog 2, is a protein that plays a role in the regulation of mRNA splicing and transportation. It is involved in the nonsense-mediated mRNA decay (NMD) pathway, which is responsible for degrading mRNA transcripts that contain premature stop codons. MAGOHB interacts with other proteins such as Y14 and UPF1 to form a complex that functions to recognize and degrade…	DEP
VWA1	Can you tell me the function of the protein "VWA1" (von Willebrand factor A domain-containing protein 1) of human?	The exact function of VWA1 in humans is not fully understood yet, but it is known to have roles in several biological processes such as cell adhesion, membrane trafficking, and signal transduction. It is also suggested to be involved in the development and differentiation of various tissues and organs, including the brain, heart, and adipose tissue. Some studies have also suggested its involvemen…	DEP
CA1	Can you tell me the function of the protein "CA1" (Carbonic anhydrase 1) of human?	Yes, the protein CA1 (Carbonic anhydrase 1) of human is an enzyme whose function is to catalyze the reversible hydration of carbon dioxide (CO2) to bicarbonate ions, which plays a crucial role in regulating acid-base balance in the body. CA1 is particularly abundant in red blood cells, where it helps to maintain the pH balance and transport CO2 from the tissues to the lungs for removal. Additiona…	DEP
POLD2	Can you tell me the function of the protein "POLD2" (DNA polymerase delta subunit 2) of human?	DNA polymerase delta subunit 2 (POLD2) is a protein that is a subunit of DNA polymerase delta, which is involved in DNA replication and DNA repair processes. Specifically, POLD2 is responsible for the catalytic activity of DNA polymerase delta, which includes the addition of nucleotide bases to a growing DNA strand during DNA synthesis. POLD2 also interacts with other subunits of DNA polymerase d…	DEP
SGSH	Can you tell me the function of the protein "SGSH" (N-sulphoglucosamine sulphohydrolase) of human?	The function of the SGSH protein (N-sulphoglucosamine sulphohydrolase) is to catalyze the hydrolysis of N-sulfated glucosamine (sGlcNAc) residues from heparan sulfate and dermatan sulfate, which are important components of the extracellular matrix found in connective tissues. This enzymatic activity is crucial for the proper degradation and turnover of these complex polysaccharides, which are inv…	DEP
HIBADH	Can you tell me the function of the protein "HIBADH" (3-hydroxyisobutyrate dehydrogenase, mitochondrial) of human?	The function of the HIBADH protein is to catalyze the oxidation of 3-hydroxyisobutyrate, a byproduct of valine catabolism, to methylmalonic semialdehyde, which can be further metabolized to succinate for energy production in the mitochondria. This enzyme plays a crucial role in maintaining the balance of energy and metabolites in the body. Mutations in the HIBADH gene can lead to various metaboli…	DEP
IGKV1D-33	Can you tell me the function of the protein "IGKV1D-33" (Immunoglobulin kappa variable 1D-33) of human?	IGKV1D-33 is a specific gene for the variable region of the kappa light chain of the immunoglobulin molecule. The function of this protein is to bind to antigens, which are foreign substances that enter the body and trigger an immune response, leading to the production of antibodies to fight against them. The immunoglobulin molecule containing IGKV1D-33 helps in the recognition and neutralization…	DEP
ITGB6	Can you tell me the function of the protein "ITGB6" (Integrin beta-6) of human?	Integrin beta-6 (ITGB6) is a transmembrane protein that is involved in cell-cell interactions, specifically in the attachment of cells to the extracellular matrix (ECM). ITGB6 is expressed on the surface of epithelial cells in the lung, pancreas, liver, and kidney, where it mediates the attachment of these cells to the ECM. ITGB6 is also involved in cell signaling pathways, regulating cell prolif…	DEP
MAP1LC3A	Can you tell me the function of the protein "MAP1LC3A" (Microtubule-associated proteins 1A/1B light chain 3A) of human?	The protein MAP1LC3A is involved in the process of autophagy, which is the degradation and recycling of cellular components. MAP1LC3A is a crucial component of the autophagy pathway, as it is responsible for the formation and elongation of the isolation membrane, which eventually leads to the formation of the autophagosome - a double-membrane vesicle that engulfs the cytoplasmic constituents and …	DEP
SRSF2	Can you tell me the function of the protein "SRSF2" (Serine/arginine-rich splicing factor 2) of human?	Yes, SRSF2 is a protein involved in RNA splicing, which is a process that removes introns (non-coding regions) from pre-mRNA molecules and joins together the exons (coding regions) to produce functional mRNA molecules. SRSF2 specifically belongs to a family of RNA-binding proteins called serine/arginine-rich splicing factors, which play a critical role in regulating splice site selection and alte…	DEP
SVEP1	Can you tell me the function of the protein "SVEP1" (Sushi, von Willebrand factor type A, EGF and pentraxin domain-containing protein 1) of human?	The protein SVEP1 is involved in the regulation of cell adhesion and migration, as well as in the inflammation response. It contains several domains that allow it to interact with other proteins and extracellular matrix components. Some studies suggest that SVEP1 may play a role in the development of certain diseases, such as rheumatoid arthritis and atherosclerosis.	DEP
RBM42	Can you tell me the function of the protein "RBM42" (RNA-binding protein 42) of human?	As an AI language model, I cannot find information on the specific function of RBM42 in humans, as there is limited research available on this particular protein. However, based on the general functions of RNA-binding proteins, RBM42 is believed to be involved in post-transcriptional regulation of gene expression, including splicing, stability, and translation of mRNA.	DEP
SRSF8	Can you tell me the function of the protein "SRSF8" (Serine/arginine-rich splicing factor 8) of human?	The protein SRSF8 (Serine/arginine-rich splicing factor 8) of human is a splicing factor that plays a role in regulating alternative splicing of mRNA transcripts. It is involved in pre-mRNA splicing and helps to enhance the recognition of specific splice sites. It has also been implicated in the regulation of mRNA stability and translation. Additionally, SRSF8 has been found to play a role in the…	DEP
FOLR2	Can you tell me the function of the protein "FOLR2" (Folate receptor beta) of human?	Folate receptor beta (FOLR2) is a protein that is involved in the transport of folate (a type of vitamin B) into cells. It is primarily found in the ovaries, uterus and placenta in females, and in the testes in males. FOLR2 has possible involvement in the growth and proliferation of cells and has been implicated in certain types of cancers such as breast, ovarian and lung cancer.	DEP
GNAQ	Can you tell me the function of the protein "GNAQ" (Guanine nucleotide-binding protein G(q) subunit alpha) of human?	The GNAQ protein (Guanine nucleotide-binding protein G(q) subunit alpha) is a signaling protein that plays a crucial role in transmitting signals from outside the cell to inside the cell. Specifically, GNAQ is a member of the G-protein family, and is involved in receptor-mediated signaling pathways, such as those initiated by G protein-coupled receptors (GPCRs).When a GPCR binds to its ligand, it…	DEP
EIF2S2	Can you tell me the function of the protein "EIF2S2" (Eukaryotic translation initiation factor 2 subunit 2) of human?	The function of the protein EIF2S2 (Eukaryotic translation initiation factor 2 subunit 2) of human is to be involved in the regulation of protein synthesis. It is a subunit of the eukaryotic translation initiation factor 2 (eIF2) complex, which is responsible for initiating the translation of mRNA into proteins. EIF2S2 binds to GTP (guanosine triphosphate) and helps in the formation of the ternar…	DEP
ABHD14B	Can you tell me the function of the protein "ABHD14B" (Protein ABHD14B) of human?	There is limited information available about the exact function of ABHD14B protein in humans. However, studies have suggested that it may play a role in lipid metabolism and inflammation. It has also been associated with certain neurological diseases such as Parkinson's and Alzheimer's. Further research is needed to fully understand the function of this protein.	DEP
PPM1F	Can you tell me the function of the protein "PPM1F" (Protein phosphatase 1F) of human?	PPM1F (Protein phosphatase 1F) is a type of protein phosphatase that is involved in regulating cellular signaling pathways. Specifically, it functions as a negative regulator of the Akt signaling pathway, which is critical for regulating cell survival, growth, and metabolism. PPM1F dephosphorylates and inactivates Akt, which helps to maintain appropriate balance in the signaling pathway and preve…	DEP
ZWILCH	Can you tell me the function of the protein "ZWILCH" (Protein zwilch homolog) of human?	The protein ZWILCH (Protein zwilch homolog) of human is a subunit of the chromosome passenger complex (CPC) which is important for controlling chromosome segregation during cell division. ZWILCH specifically acts as a scaffold protein that helps to localize other CPC subunits to specific regions of chromosomes, thereby ensuring their proper alignment and separation during mitosis. Dysfunction of …	DEP
SGCE	Can you tell me the function of the protein "SGCE" (Epsilon-sarcoglycan) of human?	The SGCE protein (Epsilon-sarcoglycan) is a member of the sarcoglycan family of transmembrane proteins. It is primarily found in skeletal and cardiac muscle cells. The function of SGCE is to stabilize and maintain the integrity of the plasma membrane of muscle cells by interacting with other sarcoglycan proteins and dystrophin. Mutations in the SGCE gene can lead to muscle weakness and muscle was…	DEP
ITGA9	Can you tell me the function of the protein "ITGA9" (Integrin alpha-9) of human?	Integrin alpha-9 (ITGA9) is a transmembrane protein that plays a key role in cell adhesion and migration. It is expressed in various cell types including endothelial cells, smooth muscle cells, and fibroblasts. ITGA9 functions as a receptor for extracellular matrix proteins, including tenascin-C and osteopontin, and is involved in cell proliferation, differentiation, and survival. Additionally, I…	DEP
TIGAR	Can you tell me the function of the protein "TIGAR" (Fructose-2,6-bisphosphatase TIGAR) of human?	The protein TIGAR (TP53-induced glycolysis and apoptosis regulator) is a fructose-2,6-bisphosphatase that regulates glycolysis and the pentose phosphate pathway. TIGAR is induced by the tumor suppressor protein p53 and plays a critical role in controlling energy metabolism and redox homeostasis in cancer cells. TIGAR regulates the levels of fructose-2,6-bisphosphate, a key regulator of glycolysis…	DEP
MGA	Can you tell me the function of the protein "MGA" (MAX gene-associated protein) of human?	The protein MGA (MAX gene-associated protein) of humans plays a role in the regulation of gene expression. It acts as a transcriptional repressor by binding to DNA sequences known as E-boxes, which are typically found in the promoter regions of genes. MGA has been shown to regulate a variety of cellular processes, including cell growth and differentiation, and its expression is altered in several…	DEP
DR1	Can you tell me the function of the protein "DR1" (Protein Dr1) of human?	The protein DR1 (Protein Dr1) of human functions as a transcriptional regulator, which means it plays a role in controlling gene expression. Specifically, DR1 binds to DNA and interacts with other proteins to either enhance or repress transcription of specific genes. It has been found to be involved in the regulation of various cellular processes, including cell proliferation and differentiation,…	DEP
CYCS	Can you tell me the function of the protein "CYCS" (Cytochrome c) of human?	The main function of CYCS (Cytochrome c) in humans is to facilitate the transport of electrons during oxidative phosphorylation (the process by which cells produce energy) by shuttling electrons between complex III and complex IV in the electron transport chain. It also has a role in apoptosis (programmed cell death), where it is released from mitochondria into the cytosol and activates caspase e…	DEP
IFI35	Can you tell me the function of the protein "IFI35" (Interferon-induced 35 kDa protein) of human?	IFI35 is a protein that is induced by interferons, which are proteins that are produced by the immune system in response to viral infections and other pathogens. The exact function of IFI35 is not well understood, but it is thought to play a role in the immune response to viral infections, possibly by modulating the activity of other immune system proteins. It has also been implicated in the regu…	DEP
HTATIP2	Can you tell me the function of the protein "HTATIP2" (Oxidoreductase HTATIP2) of human?	The protein HTATIP2, also known as HIV-1 Tat interactive protein 2 or STAF50, is an oxidoreductase enzyme that participates in various cellular processes such as DNA damage repair, cell cycle regulation, and transcriptional regulation. It has been shown to interact with the HIV-1 Tat protein and regulate its transcriptional activation function. Additionally, HTATIP2 has been implicated in tumor s…	DEP
CALR	Can you tell me the function of the protein "CALR" (Calreticulin) of human?	The function of CALR (Calreticulin) protein in humans is to act as a calcium-binding chaperone protein in the endoplasmic reticulum (ER). It helps in the folding and quality control of newly synthesized proteins and plays a crucial role in the modulation of intracellular Ca2+ homeostasis. In addition, CALR also participates in various cellular processes like cell adhesion, apoptosis, and immune r…	DEP
SEC13	Can you tell me the function of the protein "SEC13" (Protein SEC13 homolog) of human?	The protein SEC13 (Protein SEC13 homolog) of humans is a component of the nuclear pore complex (NPC) and plays a crucial role in the transport of macromolecules such as DNA, RNA, and proteins between the nucleus and cytoplasm. It is specifically involved in the formation of the coat complex that lines the cytoplasmic face of the NPC and facilitates the transport of cargo through the pore. Additio…	DEP
ANXA6	Can you tell me the function of the protein "ANXA6" (Annexin A6) of human?	The protein ANXA6 (Annexin A6) is a member of the annexin family of calcium-binding proteins. It is involved in a variety of cellular processes, including membrane trafficking, endocytosis, exocytosis, and membrane repair. ANXA6 also plays a role in intracellular calcium signaling and regulation of cytoskeletal dynamics. Additionally, ANXA6 has been implicated in various diseases, such as cancer …	DEP
BST1	Can you tell me the function of the protein "BST1" (ADP-ribosyl cyclase/cyclic ADP-ribose hydrolase 2) of human?	The protein BST1 (ADP-ribosyl cyclase/cyclic ADP-ribose hydrolase 2) of human is involved in the metabolism of nicotinamide adenine dinucleotide (NAD+) by catalyzing the conversion of NAD+ to cyclic ADP ribose (cADPR) and nicotinamide. cADPR plays a role in calcium signaling and is important for the function of various cellular processes such as insulin secretion, muscle contraction, and immune r…	DEP
COX5A	Can you tell me the function of the protein "COX5A" (Cytochrome c oxidase subunit 5A, mitochondrial) of human?	The protein COX5A is a subunit of cytochrome c oxidase (complex IV) in the mitochondria which is a key enzyme in the electron transport chain that produces ATP (adenosine triphosphate), the energy currency of the cell, by transferring electrons from cytochrome c to molecular oxygen. COX5A is involved in the regulation of mitochondrial respiratory function and plays a critical role in cellular ene…	DEP
CDK3	Can you tell me the function of the protein "CDK3" (Cyclin-dependent kinase 3) of human?	The function of CDK3 in humans is not entirely clear. It is believed to play a role in cell cycle regulation and cell proliferation through phosphorylation of various substrates. It has also been suggested to be involved in neuronal differentiation and apoptosis. However, further research is needed to fully understand its functions.	DEP
COX7A2	Can you tell me the function of the protein "COX7A2" (Cytochrome c oxidase subunit 7A2, mitochondrial) of human?	The protein COX7A2 (Cytochrome c oxidase subunit 7A2, mitochondrial) is a subunit of cytochrome c oxidase, which is a key component of the electron transport chain in mitochondria. This protein plays a critical role in the complex formation and stability of the cytochrome c oxidase enzyme. It helps in the transfer of electrons from cytochrome c to oxygen, which produces water and releases energy …	DEP
SPINT1	Can you tell me the function of the protein "SPINT1" (Kunitz-type protease inhibitor 1) of human?	Yes, SPINT1 (Kunitz-type protease inhibitor 1) is a protein in humans that functions as a serine protease inhibitor. It is primarily involved in regulating tissue growth and differentiation by inhibiting the activity of certain proteases that can promote cell proliferation and invasion. SPINT1 has been found to be expressed in various tissues including the pancreas, lung, liver, kidney, and gastr…	DEP
GGCT	Can you tell me the function of the protein "GGCT" (Gamma-glutamylcyclotransferase) of human?	The protein GGCT, also known as gamma-glutamylcyclotransferase, is an enzyme that plays a role in the metabolism of glutathione, a key antioxidant in the body. Specifically, GGCT is involved in the breakdown of gamma-glutamylcysteine, a precursor to glutathione. The exact function of GGCT is still being studied, but it is also thought to be involved in the removal of toxic substances from the bod…	DEP
ALDOC	Can you tell me the function of the protein "ALDOC" (Fructose-bisphosphate aldolase C) of human?	The protein ALDOC (Fructose-bisphosphate aldolase C) functions as an enzyme in the glycolysis pathway, catalyzing the cleavage of fructose-1,6-bisphosphate into two three-carbon sugar molecules. This reaction generates energy and is necessary for the production of ATP, which provides energy for various cellular processes. Additionally, ALDOC has been found to have non-glycolytic functions in the …	DEP
AASS	Can you tell me the function of the protein "AASS" (Alpha-aminoadipic semialdehyde synthase, mitochondrial) of human?	The protein AASS is responsible for the synthesis of the intermediate alpha-aminoadipic semialdehyde during the catabolism of lysine, hydroxylysine and tryptophan. This process takes place in the mitochondria and is essential for the production of energy and the metabolism of amino acids. Mutations in the AASS gene can lead to a rare genetic disorder called alpha-aminoadipic semialdehyde synthase…	DEP
IGHV4-30-2	Can you tell me the function of the protein "IGHV4-30-2" (Immunoglobulin heavy variable 4-30-2) of human?	The function of IGHV4-30-2 protein is to code for a specific region of the heavy chain of immunoglobulin (antibodies) which is involved in recognizing and binding to foreign antigens in the body. The specificity and diversity of IGHV4-30-2 and other immunoglobulin variable regions play a crucial role in the immune response against infections and diseases.	DEP
KRT222	Can you tell me the function of the protein "KRT222" (Keratin-like protein KRT222) of human?	As an AI language model, I am unable to find information regarding the specific function of KRT222 as it appears to be an uncharacterized protein. Further research may be required to determine its function.	DEP
KIDINS220	Can you tell me the function of the protein "KIDINS220" (Kinase D-interacting substrate of 220 kDa) of human?	The protein KIDINS220 (Kinase D-interacting substrate of 220 kDa) is involved in cell signaling pathways and plays a critical role in the development and maintenance of the nervous system. It functions as a scaffolding protein, binding to various signaling molecules and facilitating their interactions with downstream effectors. KIDINS220 is also essential for neurite outgrowth and neuronal branch…	DEP
SSB	Can you tell me the function of the protein "SSB" (Lupus La protein) of human?	The Lupus La protein, also known as SSB, is a multifunctional protein that plays a role in various cellular processes such as RNA processing, DNA replication, and DNA repair. It binds to single-stranded RNA and DNA molecules, stabilizing them and preventing their degradation. It also interacts with other proteins involved in these processes, enhancing their function. The Lupus La protein is essen…	DEP
KNTC1	Can you tell me the function of the protein "KNTC1" (Kinetochore-associated protein 1) of human?	KNTC1 is a protein that is involved in the regulation of chromosome segregation during cell division. It is a component of the kinetochore complex, which is a structure that attaches chromosomes to spindle fibers during mitosis. KNTC1 plays a key role in promoting accurate chromosome segregation during cell division, which is essential for maintaining genomic stability and preventing the developm…	DEP
RUNX1	Can you tell me the function of the protein "RUNX1" (Runt-related transcription factor 1) of human?	RUNX1 is a protein that functions as a transcription factor, meaning it helps regulate the activity of genes by binding to DNA and promoting or repressing their expression. Specifically, it plays a critical role in the development of blood cells and the immune system, and is involved in processes such as hematopoiesis (the formation of blood cells) and the differentiation of various cell types su…	DEP
UGT8	Can you tell me the function of the protein "UGT8" (2-hydroxyacylsphingosine 1-beta-galactosyltransferase) of human?	The UGT8 protein is involved in a biochemical process called glycosylation, specifically the addition of a galactose molecule to 2-hydroxyacylsphingosine. This process is important for the formation of certain types of sphingolipids, which are found in high concentrations in the nervous system and play important roles in cell signaling and cell membrane structure. Defects in UGT8 activity have be…	DEP
SRP9	Can you tell me the function of the protein "SRP9" (Signal recognition particle 9 kDa protein) of human?	SRP9 is a component of the signal recognition particle (SRP), which is involved in the targeting and insertion of nascent secretory and membrane proteins into the endoplasmic reticulum (ER) membrane. It binds to the SRP RNA and helps in the targeting of the ribosome-nascent chain complex to the ER membrane. SRP9 plays a crucial role in maintaining the fidelity of protein targeting and in preventi…	DEP
RAP1A	Can you tell me the function of the protein "RAP1A" (Ras-related protein Rap-1A) of human?	The protein RAP1A (Ras-related protein Rap-1A) of human plays a role in signal transduction and the regulation of cell junctions, adhesion, and polarity. It is involved in cell-to-cell communication, cell adhesion, and cell migration, and is essential for the proper functioning of immune cells. RAP1A also plays a role in the regulation of insulin secretion and glucose homeostasis. Additionally, i…	DEP
MAP3K20	Can you tell me the function of the protein "MAP3K20" (Mitogen-activated protein kinase kinase kinase 20) of human?	The protein MAP3K20 (Mitogen-activated protein kinase kinase kinase 20) is a signaling molecule that plays a key role in the regulation of several cellular processes such as cell proliferation, differentiation, and apoptosis. Specifically, MAP3K20 activates a signaling pathway known as the JNK (Jun N-terminal kinase) pathway, which is involved in regulating cell growth and differentiation, as wel…	DEP
ROR2	Can you tell me the function of the protein "ROR2" (Tyrosine-protein kinase transmembrane receptor ROR2) of human?	The protein ROR2 (Tyrosine-protein kinase transmembrane receptor ROR2) plays a crucial role in human development and differentiation. It is involved in various cellular processes, including the regulation of cell migration, adhesion, and differentiation. ROR2 also plays a critical role in skeletal development, as mutations in the gene that encodes for ROR2 can lead to severe skeletal abnormalitie…	DEP
ADPGK	Can you tell me the function of the protein "ADPGK" (ADP-dependent glucokinase) of human?	The function of ADPGK is to catalyze the phosphorylation of glucose using ADP as the phosphate donor, producing glucose-6-phosphate and ATP. This enzyme is essential for glucose metabolism in the liver and pancreas. Therefore, it plays a crucial role in maintaining normal blood glucose levels and energy metabolism in the body.	DEP
DENND1C	Can you tell me the function of the protein "DENND1C" (DENN domain-containing protein 1C) of human?	The protein DENND1C is a member of the DENN domain-containing family of proteins, which are involved in the regulation of intracellular vesicle trafficking and signaling pathways. DENND1C specifically has been shown to play a role in the regulation of endosome and lysosome maturation, as well as the control of actin cytoskeleton dynamics. It has also been implicated in the development and progres…	DEP
EIF4G1	Can you tell me the function of the protein "EIF4G1" (Eukaryotic translation initiation factor 4 gamma 1) of human?	EIF4G1 is a protein found in humans that is involved in the process of mRNA translation, which is the process of converting genetic information stored in mRNA into functional proteins. EIF4G1 aids in the initiation of this process by binding to the cap structure found at the 5' end of mRNA, and helping to recruit other translation initiation factors, including EIF4A, EIF4E and EIF3. Without EIF4G…	DEP
MRVI1	Can you tell me the function of the protein "MRVI1" (Protein MRVI1) of human?	The MRVI1 protein (also known as MRV or IRAG) is involved in the regulation of calcium signaling in cells. It acts as a negative regulator of calcium signaling by inhibiting the activity of inositol trisphosphate receptors (IP3Rs), which play a key role in releasing calcium from intracellular stores. By inhibiting IP3Rs, MRVI1 helps to prevent excessive calcium release and maintain calcium homeos…	DEP
IGHV3-49	Can you tell me the function of the protein "IGHV3-49" (Immunoglobulin heavy variable 3-49) of human?	The function of the protein IGHV3-49 is to encode one of the variable (V) regions of the heavy chain of immunoglobulins (antibodies) in humans. This protein plays a crucial role in recognizing and binding to specific foreign antigens, such as viruses, bacteria, or other pathogens, to initiate an immune response and protect the body from infections. Depending on the sequence and arrangement of its…	DEP
RRM2	Can you tell me the function of the protein "RRM2" (Ribonucleoside-diphosphate reductase subunit M2) of human?	The protein RRM2 (Ribonucleoside-diphosphate reductase subunit M2) is an important enzyme involved in DNA synthesis and repair. It is responsible for catalyzing the reduction of ribonucleotides to deoxyribonucleotides, which are the building blocks for DNA formation. This enzyme plays a vital role in maintaining the stability and integrity of the human genome, and its dysfunction has been implica…	DEP
PSMB10	Can you tell me the function of the protein "PSMB10" (Proteasome subunit beta type-10) of human?	The protein PSMB10 (Proteasome subunit beta type-10) is a subunit of the 20S proteasome, a large protein complex that plays a critical role in degrading proteins within cells. PSMB10 is involved in the catalytic process of protein degradation and is necessary for the chymotrypsin-like activity of the proteasome. It is also involved in the regulation of the cell cycle and immune responses. Additio…	DEP
IGHV6-1	Can you tell me the function of the protein "IGHV6-1" (Immunoglobulin heavy variable 6-1) of human?	The function of the protein IGHV6-1 is to provide diversity to the immune system by encoding a variable region in the heavy chain of antibodies. This variable region can bind to a wide variety of antigens, allowing the immune system to recognize and respond to a diverse range of pathogens.	DEP
MPZ	Can you tell me the function of the protein "MPZ" (Myelin protein P0) of human?	The protein MPZ (Myelin protein P0) is a structural protein that is essential for the formation and maintenance of the myelin sheath in the peripheral nervous system. It is involved in the adhesion of the myelin layers to each other and to the axon, allowing for the efficient conduction of nerve impulses. Mutations in the MPZ gene have been linked to peripheral neuropathies, such as Charcot-Marie…	DEP
TMEM147	Can you tell me the function of the protein "TMEM147" (Transmembrane protein 147) of human?	Unfortunately, as an AI language model, I don't have updated information about the specific function of TMEM147. However, I can suggest that you can search scientific databases like NCBI, UniProt, or PubMed for more detailed and current information on this protein's function.	DEP
NCBP2	Can you tell me the function of the protein "NCBP2" (Nuclear cap-binding protein subunit 2) of human?	The nuclear cap-binding protein subunit 2 (NCBP2) is a protein that plays a role in pre-mRNA processing and translation. Specifically, it is a subunit of the nuclear cap-binding complex (CBC), which binds to the 5' cap structure of newly synthesized mRNA molecules and participates in multiple steps of mRNA metabolism, including splicing, export, and translation initiation. NCBP2 has also been sho…	DEP
ACAT1	Can you tell me the function of the protein "ACAT1" (Acetyl-CoA acetyltransferase, mitochondrial) of human?	ACAT1 is an enzyme found in the mitochondria that helps in the breakdown of fats through a process called beta-oxidation. Specifically, it catalyzes the conversion of two molecules of acetyl-CoA into acetoacetyl-CoA, which can then be further processed to produce energy in the form of ATP. This enzyme is important in maintaining normal energy metabolism and is essential for the proper functioning…	DEP
NUP50	Can you tell me the function of the protein "NUP50" (Nuclear pore complex protein Nup50) of human?	The protein NUP50 is a component of the nuclear pore complex (NPC) which is a large protein complex that acts as a gateway for the transport of molecules between the nucleus and the cytoplasm in eukaryotic cells. NUP50 plays a role in the import and export of macromolecules such as RNA and ribosomal subunits through the NPC. It has also been shown to be involved in the regulation of transcription…	DEP
SLC1A5	Can you tell me the function of the protein "SLC1A5" (Neutral amino acid transporter B(0)) of human?	The protein SLC1A5, also known as Neutral amino acid transporter B(0), is responsible for transporting neutral amino acids across the plasma membrane of cells. This protein is found mainly in the kidneys, intestines, and brain, and plays a role in regulating the levels of amino acids in the blood. SLC1A5 is important for the growth and survival of cancer cells, as it provides them with the amino …	DEP
EMILIN1	Can you tell me the function of the protein "EMILIN1" (EMILIN-1) of human?	EMILIN1 (EMILIN-1) is a protein that is involved in extracellular matrix organization and regulation. It belongs to the family of extracellular matrix glycoproteins and is expressed in several tissues including the heart, lung, and skin. EMILIN1 is involved in the maintenance of blood vessel integrity and is also implicated in the development of certain cancers. It has been suggested that EMILIN1…	DEP
TJP2	Can you tell me the function of the protein "TJP2" (Tight junction protein ZO-2) of human?	TJP2 (Tight junction protein ZO-2) is a protein that plays a crucial role in maintaining the integrity of tight junctions, which are cell-to-cell adhesions that regulate the movement of molecules between cells. TJP2 is involved in the assembly and regulation of tight junctions by anchoring transmembrane proteins to the cytoskeleton and by signaling pathways that maintain the tight junction barrie…	DEP
IL4I1	Can you tell me the function of the protein "IL4I1" (L-amino-acid oxidase) of human?	The protein IL4I1 (L-amino-acid oxidase) of human is an enzyme that catalyzes the oxidation of L-amino acids to produce hydrogen peroxide and the corresponding keto acids. It is involved in regulating T-cell activity, promoting immune tolerance, and controlling inflammation. Additionally, IL4I1 has been shown to play a role in the metabolism of neurotransmitters and in the growth and metastasis o…	DEP
AQP1	Can you tell me the function of the protein "AQP1" (Aquaporin-1) of human?	Aquaporin-1 (AQP1) is a protein found in human cells that serves as a water channel. Its primary function is to facilitate the movement of water molecules across cell membranes, allowing for the rapid and efficient reabsorption and secretion of fluids in various tissues and organs. AQP1 is especially important in regulating water transport in the kidneys, where it helps to maintain proper fluid b…	DEP
SNRPA1	Can you tell me the function of the protein "SNRPA1" (U2 small nuclear ribonucleoprotein A') of human?	SNRPA1 (U2 small nuclear ribonucleoprotein A') is a protein involved in pre-mRNA splicing, which is the process of removing introns and joining exons to produce mature mRNA. SNRPA1 is a component of the U2 small nuclear ribonucleoprotein (snRNP), which binds to the pre-mRNA to form the spliceosome complex. SNRPA1 helps to position the splice sites and is involved in the catalytic cleavage and lig…	DEP
STAB1	Can you tell me the function of the protein "STAB1" (Stabilin-1) of human?	STAB1, also known as Stabilin-1, is a multi-functional scavenger receptor that is primarily expressed in endothelial cells and macrophages. It plays a key role in the clearance of apoptotic cells, lipoproteins, and viruses, as well as the transport of certain molecules across the endothelial barrier. In addition, STAB1 also modulates the immune response by regulating the trafficking and activatio…	DEP
PLSCR1	Can you tell me the function of the protein "PLSCR1" (Phospholipid scramblase 1) of human?	Phospholipid scramblase 1 (PLSCR1) is a multi-functional protein found in human cells that plays important roles in cell signaling and regulation. One of its main functions is to facilitate the movement of phospholipids between the inner and outer membranes of the cell, which is important for maintaining membrane integrity and signaling pathways. PLSCR1 has also been implicated in cell proliferat…	DEP
LAP3	Can you tell me the function of the protein "LAP3" (Cytosol aminopeptidase) of human?	The protein LAP3 (cytosol aminopeptidase) of human is an enzyme that belongs to the family of metalloexopeptidases. Its primary function is to cleave off the N-terminal amino acid from polypeptides and proteins, thereby regulating their activity and stability. LAP3 is involved in several cellular processes, including protein turnover, antigen presentation, and cell cycle regulation. It is also re…	DEP
ENPEP	Can you tell me the function of the protein "ENPEP" (Glutamyl aminopeptidase) of human?	The protein ENPEP (Glutamyl aminopeptidase) of humans is involved in the breakdown of small peptides in the body. Specifically, ENPEP removes amino acids from the N-terminus of peptides containing a glutamic acid residue. It is primarily expressed in the kidneys, where it plays a role in regulating blood pressure and salt balance by controlling the levels of vasoactive peptides. Additionally, ENP…	DEP
RBP4	Can you tell me the function of the protein "RBP4" (Retinol-binding protein 4) of human?	The primary function of Retinol-binding protein 4 (RBP4) in humans is to transport retinol (vitamin A) from the liver to various tissues in the body. This protein helps to maintain normal retinol levels in the blood and plays a crucial role in vision, immune function, and cellular growth and differentiation. Elevated levels of RBP4 have been associated with metabolic disorders, such as insulin re…	DEP
PEBP1	Can you tell me the function of the protein "PEBP1" (Phosphatidylethanolamine-binding protein 1) of human?	The function of the protein PEBP1 (Phosphatidylethanolamine-binding protein 1) in humans is multifaceted and not fully understood. It is known to play a role in various cellular processes, including cell signaling, metabolism, and apoptosis. PEBP1 is also involved in the regulation of neurotransmitter release and may be linked to Parkinson's disease. Additionally, PEBP1 has been implicated in can…	DEP
SPTB	Can you tell me the function of the protein "SPTB" (Spectrin beta chain, erythrocytic) of human?	The protein SPTB (Spectrin beta chain, erythrocytic) plays a crucial role in maintaining the structural integrity of erythrocytes (red blood cells) by forming a lattice-like network on the inner surface of the plasma membrane. This protein is a subunit of the heterodimeric cytoskeletal protein spectrin, which forms a network of protein complexes that maintain the shape and stability of erythrocyt…	DEP
SERPINE2	Can you tell me the function of the protein "SERPINE2" (Glia-derived nexin) of human?	The protein SERPINE2 (Glia-derived nexin) is mainly known for its role as an inhibitor of enzymes called serine proteases, such as plasmin and thrombin. SERPINE2 is involved in a variety of biological processes, including tissue repair, angiogenesis, and cell migration. It has also been reported to modulate immune response and inflammation. In the central nervous system, SERPINE2 is synthesized b…	DEP
TIMP2	Can you tell me the function of the protein "TIMP2" (Metalloproteinase inhibitor 2) of human?	The protein TIMP2 is an inhibitor of metalloproteinases, which are enzymes that break down various components of the extracellular matrix. TIMP2 specifically inhibits the activity of matrix metalloproteinases (MMPs), which are involved in tissue remodeling, wound healing, and angiogenesis. Its function is to regulate the activity of MMPs and maintain the balance between matrix synthesis and degra…	DEP
PRKAR2B	Can you tell me the function of the protein "PRKAR2B" (cAMP-dependent protein kinase type II-beta regulatory subunit) of human?	PRKAR2B is a regulatory subunit of the cAMP-dependent protein kinase type II (PKA-II), which is a key player in the cAMP signaling pathway. PRKAR2B acts as an inhibitor of PKA-II activity in the absence of cAMP but dissociates from the catalytic subunits upon binding to cAMP, thereby activating PKA-II. PRKAR2B is involved in a wide range of biological processes including cellular differentiation,…	DEP
CPOX	Can you tell me the function of the protein "CPOX" (Oxygen-dependent coproporphyrinogen-III oxidase, mitochondrial) of human?	The protein CPOX (Oxygen-dependent coproporphyrinogen-III oxidase, mitochondrial) of human is involved in the heme biosynthetic pathway. It catalyzes the sixth step of this pathway by converting coproporphyrinogen III into protoporphyrinogen IX. This step is an important regulatory step in heme biosynthesis and deficiency of CPOX can cause hereditary coproporphyria, a genetic disorder that affect…	DEP
NUDT21	Can you tell me the function of the protein "NUDT21" (Cleavage and polyadenylation specificity factor subunit 5) of human?	NUDT21, also known as Cleavage and polyadenylation specificity factor subunit 5 (CPSF5), is a protein that plays a crucial role in post-transcriptional processing of messenger RNA (mRNA). This protein is a subunit of the Cleavage and Polyadenylation Specificity Factor (CPSF) complex, which is responsible for the cleavage and polyadenylation of pre-mRNAs in eukaryotic cells.NUDT21/CPSF5 is involve…	DEP
ABRACL	Can you tell me the function of the protein "ABRACL" (Costars family protein ABRACL) of human?	Unfortunately, as an AI language model, I do not have access to the latest scientific research that may have been conducted on the function of the protein "ABRACL" (Costars family protein ABRACL) in human beings. I would recommend conducting a literature search or consulting with a biological expert to get more information on this topic.	DEP
PPP1R12C	Can you tell me the function of the protein "PPP1R12C" (Protein phosphatase 1 regulatory subunit 12C) of human?	The protein PPP1R12C (Protein phosphatase 1 regulatory subunit 12C) of human functions as a regulatory subunit of the protein phosphatase 1 (PP1) enzyme. It plays a role in the regulation of smooth muscle contraction by interacting with myosin phosphatase and modulating its activity. PPP1R12C is expressed mostly in smooth muscle tissues, and alterations in its expression levels have been associat…	DEP
SCPEP1	Can you tell me the function of the protein "SCPEP1" (Retinoid-inducible serine carboxypeptidase) of human?	The function of SCPEP1 (Retinoid-inducible serine carboxypeptidase) protein in humans is not yet fully understood, but it is thought to play a role in regulating cell growth, division, and differentiation. It is also believed to be involved in the regulation of the immune system and in inflammation. Some studies have suggested that it may be involved in tumor suppression.	DEP
OSTF1	Can you tell me the function of the protein "OSTF1" (Osteoclast-stimulating factor 1) of human?	The protein OSTF1 (Osteoclast-stimulating factor 1) of human is involved in the regulation of bone remodeling. It plays a role in the differentiation and activation of osteoclasts, which are cells that break down and resorb bone tissue. OSTF1 may also be involved in the formation and function of other cells involved in bone biology, such as osteoblasts and chondrocytes. In addition, OSTF1 has bee…	DEP
SBSN	Can you tell me the function of the protein "SBSN" (Suprabasin) of human?	The protein SBSN (Suprabasin) of human is involved in the development and maintenance of the skin barrier. It is specifically expressed in the stratum granulosum layer of the epidermis, where it is thought to play a role in the maturation and differentiation of keratinocytes (skin cells) and the formation of the cornified envelope that provides protection against external insults. SBSN also appea…	DEP
ARHGEF16	Can you tell me the function of the protein "ARHGEF16" (Rho guanine nucleotide exchange factor 16) of human?	ARHGEF16 (Rho guanine nucleotide exchange factor 16) is a protein that functions as a guanine nucleotide exchange factor (GEF) for the Rho GTPase family of proteins. It plays a role in cytoskeletal remodeling and cell migration by activating RhoA, which regulates the actin cytoskeleton. ARHGEF16 has also been implicated in cell proliferation and apoptosis, and has been associated with certain typ…	DEP
UQCRB	Can you tell me the function of the protein "UQCRB" (Cytochrome b-c1 complex subunit 7) of human?	The protein UQCRB is a subunit of the cytochrome b-c1 complex, which is a key enzyme in the electron transport chain of the mitochondria. Specifically, UQCRB is involved in the transfer of electrons from ubiquinone to cytochrome c, which generates a proton gradient used for ATP synthesis. Therefore, UQCRB plays a critical role in the production of cellular energy.	DEP
NDC1	Can you tell me the function of the protein "NDC1" (Nucleoporin NDC1) of human?	The protein NDC1 (Nucleoporin NDC1) is an important component of the nuclear pore complex (NPC), which regulates the transport of molecules between the nucleus and cytoplasm. NDC1 is involved in the assembly and maintenance of the NPC, and it interacts with other nucleoporins to form the structural framework of the NPC. NDC1 also plays a role in the regulation of gene expression by participating …	DEP
SPINT2	Can you tell me the function of the protein "SPINT2" (Kunitz-type protease inhibitor 2) of human?	The protein SPINT2 (Kunitz-type protease inhibitor 2) of human functions as a protease inhibitor. It binds to and inhibits several different proteases, preventing them from breaking down proteins in the body. This protein is involved in various physiological processes such as tissue remodeling, development, and wound healing. It is also implicated in cancer progression and metastasis as its downr…	DEP
TPM4	Can you tell me the function of the protein "TPM4" (Tropomyosin alpha-4 chain) of human?	The protein TPM4 (Tropomyosin alpha-4 chain) is predominantly expressed in skeletal muscles and plays an essential role in regulating muscle contraction by binding to actin and stabilizing the actin-myosin interaction. Additionally, TPM4 has been implicated in cytoskeletal organization, cell division, and cell motility in non-muscle cells. It has also been linked to certain diseases such as cance…	DEP
CCDC57	Can you tell me the function of the protein "CCDC57" (Coiled-coil domain-containing protein 57) of human?	As an AI language model, I do not have access to the latest scientific researches, so I cannot precisely tell you the function of CCDC57 protein. However, according to available biological databases, CCDC57 may play a role in protein binding, organelle organization, and regulation of gene expression. Its precise function might depend on the interactions with other proteins or cellular processes.	DEP
ISLR	Can you tell me the function of the protein "ISLR" (Immunoglobulin superfamily containing leucine-rich repeat protein) of human?	ISLR regulates dendrite arborization and spine density in mature neurons to control synaptic connectivity and promote learning and memory retention. It also plays a role in the development of different parts of the brain.	DEP
ALDH1A2	Can you tell me the function of the protein "ALDH1A2" (Retinal dehydrogenase 2) of human?	ALDH1A2, also known as Retinal dehydrogenase 2, is a protein that plays a critical role in the synthesis of retinoic acid, which is an important signaling molecule involved in the regulation of gene expression during embryonic development, organogenesis, and tissue homeostasis in humans. ALDH1A2 catalyzes the conversion of retinal to retinoic acid, which is essential for the development of variou…	DEP
FBLN2	Can you tell me the function of the protein "FBLN2" (Fibulin-2) of human?	FBLN2 (Fibulin-2) is a protein that belongs to the fibulin family of extracellular matrix proteins. It is involved in tissue development, repair and homeostasis. Some of its functions include	DEP
IDH2	Can you tell me the function of the protein "IDH2" (Isocitrate dehydrogenase [NADP], mitochondrial) of human?	The IDH2 protein is an enzyme that catalyzes the oxidative decarboxylation of isocitrate to alpha-ketoglutarate in the citric acid cycle, producing NADPH in the process. This reaction is important for energy production and the regulation of cellular redox status, as well as for biosynthetic processes that require NADPH as a reducing co-factor, such as fatty acid and nucleotide synthesis. Mutation…	DEP
CES1	Can you tell me the function of the protein "CES1" (Liver carboxylesterase 1) of human?	The protein CES1, also known as liver carboxylesterase 1, plays a crucial role in the metabolism and detoxification of various drugs and xenobiotics in the liver. It is responsible for hydrolyzing a wide range of ester-containing compounds, including many drugs such as aspirin, clopidogrel, and codeine. Additionally, CES1 is also involved in the breakdown of dietary fats and the regulation of lip…	DEP
CES1P1	Can you tell me the function of the protein "CES1P1" (Putative inactive carboxylesterase 4) of human?	The CES1P1 protein is a putative inactive carboxylesterase 4 in humans. While its specific function is unclear, carboxylesterases are enzymes involved in the metabolism of a wide range of small molecules, including drugs, xenobiotics, and endogenous compounds. Inactive carboxylesterases may still play a role in regulatory or signaling pathways within the cell, but further research is necessary to…	DEP
PHLDB1	Can you tell me the function of the protein "PHLDB1" (Pleckstrin homology-like domain family B member 1) of human?	PHLDB1 is a protein in humans that has been shown to play a role in several cellular processes, including cell migration, invasion, proliferation, and survival. It is involved in the regulation of cancer cells and has been found to be overexpressed in several types of cancer, including breast cancer and gastric cancer. PHLDB1 binds to and regulates the activity of several signaling proteins, incl…	DEP
CAMK2B	Can you tell me the function of the protein "CAMK2B" (Calcium/calmodulin-dependent protein kinase type II subunit beta) of human?	The protein CAMK2B (Calcium/calmodulin-dependent protein kinase type II subunit beta) is a kinase enzyme that is activated by calcium and calmodulin. It is involved in a variety of cellular processes, including the regulation of synaptic plasticity, learning, memory, and apoptosis. Specifically, CAMK2B plays a crucial role in regulating long-term potentiation (LTP) and dendritic spine morphology …	DEP
CAMK2G	Can you tell me the function of the protein "CAMK2G" (Calcium/calmodulin-dependent protein kinase type II subunit gamma) of human?	The protein CAMK2G is a member of the calcium/calmodulin-dependent protein kinase (CaMK) family, which is involved in a variety of cellular processes including synaptic plasticity, cell division, and gene expression. CAMK2G specifically plays a role in regulating ion channel activity, neurotransmitter release, and long-term potentiation in neurons. It is also involved in the regulation of muscle …	DEP
ECM1	Can you tell me the function of the protein "ECM1" (Extracellular matrix protein 1) of human?	The protein ECM1 (Extracellular matrix protein 1) of human is involved in various biological processes such as extracellular matrix organization, cell adhesion, and angiogenesis. It is a glycoprotein that plays a critical role in maintaining the structure and function of the extracellular matrix, which is a network of proteins and carbohydrates that provides structural support to tissues and orga…	DEP
DUSP11	Can you tell me the function of the protein "DUSP11" (RNA/RNP complex-1-interacting phosphatase) of human?	The protein DUSP11 (RNA/RNP complex-1-interacting phosphatase) of humans is a dual-specificity phosphatase that is involved in the regulation of various cellular processes such as cell growth, differentiation, and survival. It specifically interacts with RNA/RNP complex-1, which is involved in the regulation of RNA stability and translation. DUSP11 dephosphorylates mitogen-activated protein kinas…	DEP
RPS9	Can you tell me the function of the protein "RPS9" (40S ribosomal protein S9) of human?	The RPS9 protein is a component of the small ribosomal subunit in eukaryotic cells. It plays an essential role in the assembly and stability of the ribosome, participating in the formation of the mRNA decoding site, and facilitating the correct positioning of the ribosome on the mRNA during translation. Additionally, RPS9 may also play a role in regulating the translation of specific mRNAs.	DEP
TOP2A	Can you tell me the function of the protein "TOP2A" (DNA topoisomerase 2-alpha) of human?	The protein TOP2A (DNA topoisomerase 2-alpha) is a crucial enzyme involved in the regulation of DNA topology and chromosome segregation during cell division. It is responsible for the transient cleavage of both strands of DNA, allowing it to pass through another strand before resealing it. TOP2A is required for DNA replication, recombination, chromosome condensation, and transcription. It is also…	DEP
ERLIN2	Can you tell me the function of the protein "ERLIN2" (Erlin-2) of human?	ERLIN2 (Erlin-2) is a protein that plays a role in endoplasmic reticulum (ER) morphology and lipid metabolism. Specifically, ERLIN2 is involved in the regulation of ER-associated protein degradation (ERAD), which is a process by which misfolded or unnecessary proteins in the ER are eliminated. ERLIN2 also plays a role in cholesterol and lipid metabolism through interaction with the sterol regulat…	DEP
SAMD9	Can you tell me the function of the protein "SAMD9" (Sterile alpha motif domain-containing protein 9) of human?	The function of SAMD9 is to act as a tumor suppressor protein, which means it helps prevent the development and growth of cancer cells. It regulates cell growth and division by interacting with other proteins and signaling pathways. Additionally, SAMD9 has been shown to play a role in the body's immune response by activating antiviral pathways and inhibiting viral replication.	DEP
RPS6	Can you tell me the function of the protein "RPS6" (40S ribosomal protein S6) of human?	The protein RPS6 (40S ribosomal protein S6) is a component of the ribosome, which is a complex molecular machine involved in protein synthesis. RPS6 is specifically found in the smaller subunit of the ribosome, and it plays a role in the translation of mRNA into a polypeptide chain by helping to recognize the start codon and facilitating the formation of the peptide bond between adjacent amino ac…	DEP
DCHS1	Can you tell me the function of the protein "DCHS1" (Protocadherin-16) of human?	The protein DCHS1 (Protocadherin-16) is involved in cell adhesion and signaling pathways during tissue development in humans. It plays a role in regulating the orientation of cell division and shaping of embryonic tissues such as the brain and heart. Mutations in DCHS1 have been associated with neural tube defects and congenital heart diseases.	DEP
IGKV1-33	Can you tell me the function of the protein "IGKV1-33" (Immunoglobulin kappa variable 1-33) of human?	IGKV1-33 is a type of immunoglobulin kappa variable region gene. It codes for a specific part of an antibody molecule that recognizes and binds to antigens, triggering an immune response. The exact function of IGKV1-33 will depend on the specific antibody it is a part of and the antigen it is targeting.	DEP
GPD1L	Can you tell me the function of the protein "GPD1L" (Glycerol-3-phosphate dehydrogenase 1-like protein) of human?	The protein "GPD1L" (Glycerol-3-phosphate dehydrogenase 1-like protein) is involved in the glycerolipid metabolism, which refers to the metabolic pathway by which the glycerol molecule is converted to triacylglycerols (TAGs), the primary form of energy storage in humans, and other important lipid molecules such as phospholipids and sphingolipids. GPD1L is specifically responsible for catalyzing t…	DEP
MFGE8	Can you tell me the function of the protein "MFGE8" (Lactadherin) of human?	The protein MFGE8 (Lactadherin) of human has multiple functions. It is primarily involved in the regulation of immune responses, as it helps in the clearance of apoptotic cells and debris from tissues. Additionally, it is involved in the maintenance of cellular and tissue homeostasis, as well as in the regulation of cell differentiation and proliferation. MFGE8 has also been implicated in the pat…	DEP
CORO1C	Can you tell me the function of the protein "CORO1C" (Coronin-1C) of human?	The protein CORO1C (Coronin-1C) is involved in regulating cell movement, including migration and adhesion. It is also involved in the organization of the actin cytoskeleton, which plays a key role in cell shape and movement. Additionally, CORO1C is involved in the immune system response, as it is required for the proper functioning of certain immune cells, such as T cells and neutrophils.	DEP
CDH11	Can you tell me the function of the protein "CDH11" (Cadherin-11) of human?	Yes, CDH11 (Cadherin-11) is a protein that acts as a cell adhesion molecule, helping to bind cells together in various tissues throughout the body. It is mainly found in mesenchymal tissues, such as bone, cartilage, and muscle, where it plays a role in regulating cell behavior and tissue organization. CDH11 is also involved in various cellular processes, including cell migration, proliferation, d…	DEP
ATAD2	Can you tell me the function of the protein "ATAD2" (ATPase family AAA domain-containing protein 2) of human?	The exact function of ATAD2 is not fully understood, but research suggests that it plays a role in regulating the cell cycle and DNA replication. It has also been linked to certain cancers and may have oncogenic functions. Additionally, ATAD2 has been shown to interact with a variety of proteins involved in chromatin remodeling and transcriptional regulation.	DEP
DDX58	Can you tell me the function of the protein "DDX58" (Probable ATP-dependent RNA helicase DDX58) of human?	The protein DDX58 (Probable ATP-dependent RNA helicase DDX58) of human is a vital component of the innate immune system. It plays a critical role in detecting viral infections and triggering antiviral responses in infected cells. DDX58, also known as RIG-I (Retinoic acid-inducible gene I), acts as a cytoplasmic sensor for the presence of viral RNA. When it binds to viral RNA, it triggers a signal…	DEP
EPHB4	Can you tell me the function of the protein "EPHB4" (Ephrin type-B receptor 4) of human?	The protein EPHB4 is a receptor protein that is involved in various biological processes in human, including cell adhesion, migration, and signaling. It belongs to the Ephrin receptor subfamily of receptor tyrosine kinases that play important roles in tissue development, angiogenesis, and tumor growth. EPHB4 specifically binds to ephrin-B2, which regulates developmental processes such as axon gui…	DEP
SEPTIN10	Can you tell me the function of the protein "SEPTIN10" (Septin-10) of human?	Septin-10 is a member of the septin family of GTP-binding proteins that are involved in a variety of cellular processes, including cytokinesis, vesicle trafficking, and cytoskeleton organization. Its precise function in humans is not well understood, although studies suggest that it may play a role in regulating cell division and migration. It has also been implicated in diseases such as Alzheime…	DEP
LAMA2	Can you tell me the function of the protein "LAMA2" (Laminin subunit alpha-2) of human?	The function of the protein LAMA2 (Laminin subunit alpha-2) in humans is to form a component of laminin, a protein that is a major component of the extracellular matrix. Laminin is essential for maintaining the integrity and function of tissues and organs, including muscle, nerve, and skin. In particular, LAMA2 is found in specialized structures called basement membranes, which help anchor cells …	DEP
FETUB	Can you tell me the function of the protein "FETUB" (Fetuin-B) of human?	Fetuin-B (FETUB) is a glycoprotein that is widely expressed in human tissues, particularly in the liver and adipose tissue. Its specific function is not fully understood, but it has been implicated in several processes, including regulation of insulin secretion, bone mineralization, and lipid metabolism. FETUB has also been suggested to play a role in modulating inflammation and cell growth. Muta…	DEP
PTGR1	Can you tell me the function of the protein "PTGR1" (Prostaglandin reductase 1) of human?	Prostaglandin reductase 1 (PTGR1) is a human protein that is primarily involved in the metabolism and regulation of prostaglandins, which are hormone-like substances that play important roles in regulating various physiological processes in the body, including inflammation, blood clotting, and blood vessel constriction. PTGR1 is responsible for converting certain prostaglandins into their inactiv…	DEP
CHEK2	Can you tell me the function of the protein "CHEK2" (Serine/threonine-protein kinase Chk2) of human?	The protein CHEK2 is a serine/threonine-protein kinase that functions as a tumor suppressor protein. Its primary function is to maintain genomic stability and prevent the development of cancerous cells. CHEK2 responds to DNA damage signals and helps to transmit those signals to downstream effector proteins that activate DNA repair pathways or induce cell cycle arrest to facilitate DNA damage repa…	DEP
MELTF	Can you tell me the function of the protein "MELTF" (Melanotransferrin) of human?	MELTF (Melanotransferrin), also known as MTF1 or CD228, is a multifunctional glycoprotein that is highly expressed in melanoma cells and brain tissues. Its functions include	DEP
HIST1H2BA	Can you tell me the function of the protein "HIST1H2BA" (Histone H2B type 1-A) of human?	Histone H2B type 1-A (HIST1H2BA) is a protein component of the chromatin structure in cells, where it binds to DNA and helps to organize it into a compact, condensed structure. Histones are essential to the regulation of gene expression and the maintenance of chromosomal stability during cell replication. HIST1H2BA specifically is involved in the formation of nucleosomes, which are the basic buil…	DEP
HIST1H2BL	Can you tell me the function of the protein "HIST1H2BL" (Histone H2B type 1-L) of human?	The protein HIST1H2BL is a histone protein, which is one of the components of chromatin. Histones help to package DNA into a compact form and regulate gene expression. The specific function of HIST1H2BL is to work with other histones to form the nucleosome structure, which is the fundamental unit of chromatin.	DEP
IGHV1-69	Can you tell me the function of the protein "IGHV1-69" (Immunoglobulin heavy variable 1-69) of human?	The IGHV1-69 protein is a component of the human immune system and is specifically a variation of the heavy chain of an antibody. Antibodies, also known as immunoglobulins, play a crucial role in protecting the body against foreign invaders such as bacteria, viruses, and other pathogens. IGHV1-69 is involved in the formation of the antigen-binding site of the antibody, which allows it to recogniz…	DEP
DSTN	Can you tell me the function of the protein "DSTN" (Destrin) of human?	The protein DSTN (Destrin) belongs to the actin-binding protein family and is involved in the regulation of actin dynamics. It facilitates actin filament disassembly, which is essential for various cellular processes such as cell migration, cytokinesis, and endocytosis. Additionally, it plays an important role in the organization of the cytoskeleton and cellular morphology. In summary, DSTN is cr…	DEP
MYL6B	Can you tell me the function of the protein "MYL6B" (Myosin light chain 6B) of human?	MYL6B is a protein that belongs to a class of proteins known as myosin light chains. This protein is primarily expressed in smooth muscle cells and plays a key role in regulating smooth muscle contraction. Specifically, MYL6B binds to myosin, a protein that is responsible for generating force during muscle contraction, and regulates its activity. In addition, MYL6B has been implicated in several …	DEP
S100A11	Can you tell me the function of the protein "S100A11" (Protein S100-A11) of human?	The protein S100A11, also known as protein S100-A11, is involved in various cellular processes such as proliferation, differentiation, and apoptosis. It acts as a calcium-binding protein and is known to regulate cell growth and survival. S100A11 has been found to play a role in several diseases, including cancer and inflammatory disorders. It is also involved in wound healing and has been suggest…	DEP
PARG	Can you tell me the function of the protein "PARG" (Poly(ADP-ribose) glycohydrolase) of human?	Yes, PARG is an enzyme that plays a key role in the regulation of various cellular processes, including DNA repair, replication, and transcription. Specifically, PARG is involved in the degradation of poly(ADP-ribose) (PAR), a post-translational modification that is added to proteins and DNA in response to various stressors, such as DNA damage. By catalyzing the hydrolysis of PAR into its constit…	DEP
CAT	Can you tell me the function of the protein "CAT" (Catalase) of human?	The protein "CAT" (Catalase) of humans catalyzes the breakdown of hydrogen peroxide into water and oxygen, which helps to protect cells from oxidative damage.	DEP
RBM47	Can you tell me the function of the protein "RBM47" (RNA-binding protein 47) of human?	As an AI language model, I don't have the current knowledge of the functions of all proteins, including RBM47. However, RBM47 (RNA-binding protein 47) is an RNA-binding protein, which means that it binds to RNA molecules and plays a role in regulating various biological processes, such as RNA splicing, processing, stability, and transport. RBM47 has been implicated in embryonic development, as we…	DEP
RBM46	Can you tell me the function of the protein "RBM46" (Probable RNA-binding protein 46) of human?	There is limited information available on the exact function of RBM46. It is predicted to be a RNA-binding protein, which means it may play a role in regulating gene expression by binding to RNA molecules. Some studies have suggested that RBM46 may be involved in cellular processes such as RNA splicing and translation initiation. However, further research is needed to fully understand the functio…	DEP
A1CF	Can you tell me the function of the protein "A1CF" (APOBEC1 complementation factor) of human?	The A1CF protein is believed to play a role in RNA editing and splicing in humans. Specifically, it is thought to be involved in regulating the activity of the APOBEC1 enzyme, which is responsible for editing the mRNA encoding apolipoprotein B (APOB). A1CF is also known to interact with other proteins involved in RNA metabolism and splicing, suggesting that it may play a broader role in these pro…	DEP
LGMN	Can you tell me the function of the protein "LGMN" (Legumain) of human?	The LGMN (Legumain) protein in humans is a cysteine protease that is involved in the processing and degradation of various cellular proteins. It has been shown to play a role in certain physiological processes such as antigen processing, apoptosis, and cell differentiation. Additionally, LGMN has been implicated in various pathological conditions such as cancer, inflammation, and neurodegeneratio…	DEP
IQGAP3	Can you tell me the function of the protein "IQGAP3" (Ras GTPase-activating-like protein IQGAP3) of human?	The protein IQGAP3 (Ras GTPase-activating-like protein IQGAP3) of human plays a role in regulating cell migration, cell division, and cell adhesion. It interacts with the cytoskeleton and various signaling molecules to regulate cell behavior. IQGAP3 has also been implicated in cancer progression, as it may contribute to the uncontrolled growth and spread of tumor cells.	DEP
H1FX	Can you tell me the function of the protein "H1FX" (Histone H1x) of human?	The protein H1FX, also known as Histone H1x, is a member of the histone H1 family of proteins that bind to chromatin and regulate gene expression, DNA replication, repair, and recombination. H1FX is specifically expressed in testis and plays a critical role in spermatogenesis through the regulation of meiotic recombination and chromosomal segregation. It has also been implicated in the regulation…	DEP
JPT1	Can you tell me the function of the protein "JPT1" (Jupiter microtubule associated homolog 1) of human?	As an AI language model, I do not have access to the latest scientific research papers. However, based on the available published studies, it has been reported that JPT1 protein is involved in microtubule organization and regulation of cilia formation. Additionally, it has been found to play a potential role in the development of kidney cysts, and mutations in the gene encoding for JPT1 can resul…	DEP
RPF2	Can you tell me the function of the protein "RPF2" (Ribosome production factor 2 homolog) of human?	RPF2 is a ribosome assembly factor essential for the biogenesis of 60S ribosomal subunits. It is involved in the assembly of the ribosomal large subunit, where it functions as a scaffold protein for the assembly of ribosomal RNA (rRNA) and ribosomal proteins into mature ribosomes. RPF2 is also involved in the regulation of cell proliferation and apoptosis through its interaction with the tumor su…	DEP
MYPN	Can you tell me the function of the protein "MYPN" (Myopalladin) of human?	The protein MYPN, also known as Myopalladin, is primarily found in skeletal and cardiac muscles where it plays an essential role in the formation and organization of the muscle Z-disc. The Z-disc is the protein-rich boundary structure that separates adjacent sarcomeres (the basic functional unit of muscle fibers) and is pivotal in muscle contraction. MYPN functions as a structural protein and hel…	DEP
PALLD	Can you tell me the function of the protein "PALLD" (Palladin) of human?	Palladin is a cytoskeletal protein that plays a role in the formation, organization, and maintenance of actin stress fibers in cells. It also functions as an adaptor protein that interacts with a variety of signaling molecules, such as kinases and GTPases, and influences their activity and localization within the cell. Palladin is involved in cell migration, adhesion, and polarity, and has been i…	DEP
CADM3	Can you tell me the function of the protein "CADM3" (Cell adhesion molecule 3) of human?	CADM3 (Cell adhesion molecule 3) protein in humans is involved in cell-cell fusion and plays a crucial role in the formation and maintenance of synapses in the brain. It is expressed in various tissues, including the brain, lung, kidney, and liver. In the brain, CADM3 has been implicated in synaptic plasticity and is therefore important for learning and memory. Additionally, it has been shown to …	DEP
ANGPTL6	Can you tell me the function of the protein "ANGPTL6" (Angiopoietin-related protein 6) of human?	The exact function of ANGPTL6 is still not completely understood. However, research suggests that it is involved in processes related to metabolism, particularly in regulating glucose and lipid metabolism. ANGPTL6 may also be involved in regulating the growth and differentiation of cells, as well as in angiogenesis (the formation of new blood vessels). Additionally, ANGPTL6 has been implicated in…	DEP
PLOD2	Can you tell me the function of the protein "PLOD2" (Procollagen-lysine,2-oxoglutarate 5-dioxygenase 2) of human?	The PLOD2 protein is responsible for modifying collagen molecules by adding hydroxylysine residues to them, which allows for the formation of stable and crosslinked collagen fibrils. This process is important for the proper formation and maintenance of connective tissues in the body, including bone, cartilage, and skin. PLOD2 has also been implicated in various pathological processes, including f…	DEP
ANGPTL2	Can you tell me the function of the protein "ANGPTL2" (Angiopoietin-related protein 2) of human?	ANGPTL2 (Angiopoietin-related protein 2) protein is known to have various functions in human biology. Some of the known functions of ANGPTL2 are	DEP
JTB	Can you tell me the function of the protein "JTB" (Protein JTB) of human?	The function of protein JTB in human is not clear yet. It is a member of the JNK-binding scaffold protein family and is thought to play a role in intracellular signaling pathways. Some studies suggest that JTB may be involved in regulating cellular proliferation, differentiation, and apoptosis in certain cell types, but further research is needed to fully understand its function.	DEP
COLEC12	Can you tell me the function of the protein "COLEC12" (Collectin-12) of human?	COLEC12 (Collectin-12) is a protein that belongs to the collectin family, which plays a significant role in innate immunity. The function of COLEC12 is not yet fully understood, but it has been suggested to be involved in several biological processes such as immune response, inflammation, and tissue repair.Some studies have suggested that COLEC12 may act as an opsonin, which is a molecule that bi…	DEP
COL1A2	Can you tell me the function of the protein "COL1A2" (Collagen alpha-2(I) chain) of human?	The function of collagen alpha-2(I) chain (COL1A2) is to provide structural support and strength to various tissues in the body, including bones, tendons, ligaments, and skin. It is a major component of the extracellular matrix, which is the network of proteins and other molecules that supports cells and tissues. COL1A2 forms a triple-helical structure with collagen alpha-1(I) chains, which is th…	DEP
SLC8A1	Can you tell me the function of the protein "SLC8A1" (Sodium/calcium exchanger 1) of human?	The SLC8A1 protein, also known as the sodium/calcium exchanger 1, is a transmembrane protein that plays a key role in regulating the concentrations of calcium and sodium ions within cells. Specifically, it facilitates the transport of calcium ions out of the cell in exchange for sodium ions, thereby maintaining proper cellular ion balance. This is a critical function for a variety of cellular pro…	DEP
BCAM	Can you tell me the function of the protein "BCAM" (Basal cell adhesion molecule) of human?	The protein BCAM (Basal cell adhesion molecule) plays a role in cell adhesion and is involved in the formation of cell-cell junctions. It is also thought to be important in the development and maintenance of various tissues and organs, including the nervous system and the immune system. Additionally, mutations in the BCAM gene have been linked to certain genetic disorders, such as the Knobloch sy…	DEP
ENO2	Can you tell me the function of the protein "ENO2" (Gamma-enolase) of human?	The protein ENO2, also known as Gamma-enolase, is an enzyme that catalyzes the conversion of 2-phosphoglycerate to phosphoenolpyruvate during glycolysis. It is primarily found in neuronal and neuroendocrine cells, and is involved in various cellular processes such as metabolism, stress response, and cell signaling. Additionally, ENO2 has been implicated in numerous diseases, including cancer, neu…	DEP
SQOR	Can you tell me the function of the protein "SQOR" (Sulfide:quinone oxidoreductase, mitochondrial) of human?	The protein SQOR (Sulfide	DEP
RPL22	Can you tell me the function of the protein "RPL22" (60S ribosomal protein L22) of human?	The RPL22 protein, also known as 60S ribosomal protein L22, is a component of the large ribosomal subunit in humans that is involved in protein translation. It plays a role in stabilizing the ribosome structure and promoting efficient peptide bond formation between amino acids during protein synthesis. Additionally, RPL22 has been implicated in various cellular processes, including cell prolifera…	DEP
GBP5	Can you tell me the function of the protein "GBP5" (Guanylate-binding protein 5) of human?	Sure! GBP5 (Guanylate-binding protein 5) is an interferon-inducible protein that plays a role in the innate immune response to viral and bacterial infections. It has been shown to have antiviral activity against several different viruses, including influenza, vesicular stomatitis virus, and herpes simplex virus. GBP5 functions by binding to and hydrolyzing GTP, which is necessary for signaling pa…	DEP
APOC1	Can you tell me the function of the protein "APOC1" (Apolipoprotein C-I) of human?	The protein APOC1 (Apolipoprotein C-I) in humans is involved in the regulation of lipid metabolism. It is a component of very low-density lipoprotein (VLDL) and high-density lipoprotein (HDL) particles and functions as an inhibitor of lipoprotein lipase, an enzyme that breaks down triglycerides in the blood. APOC1 also plays a role in the transport and metabolism of cholesterol and other lipids i…	DEP
FGL2	Can you tell me the function of the protein "FGL2" (Fibroleukin) of human?	The protein FGL2 (Fibroleukin) is known to have various functions, including regulating the immune response, promoting blood clotting, and regulating cell growth and differentiation. It has also been shown to play a role in cancer development and progression, as well as in the development of autoimmune diseases. Additionally, FGL2 has been implicated in the regulation of pregnancy and fetal devel…	DEP
EPDR1	Can you tell me the function of the protein "EPDR1" (Mammalian ependymin-related protein 1) of human?	EPDR1 (Mammalian ependymin-related protein 1) is a protein that is primarily expressed in the brain and is involved in various biological processes related to neural development and plasticity. Some of the functions of EPDR1 include	DEP
LHPP	Can you tell me the function of the protein "LHPP" (Phospholysine phosphohistidine inorganic pyrophosphate phosphatase) of human?	The function of the protein LHPP in humans is to act as an enzyme that catalyzes the dephosphorylation of phospholysine, phosphohistidine, and inorganic pyrophosphate, which are essential processes involved in human metabolism and cellular signaling. Additionally, LHPP has been implicated in the regulation of cell proliferation and apoptosis. Defects in LHPP have also been associated with a varie…	DEP
CENPV	Can you tell me the function of the protein "CENPV" (Centromere protein V) of human?	As an AI language model, I do not have access to the most recent scientific research data, but according to the existing scientific literature, the function of the human protein CENPV (Centromere protein V) is to participate in the organization and maintenance of the centromere during mitosis, the stage of cell division when chromosomes are separated into two identical sets. The centromere is a s…	DEP
TRIM22	Can you tell me the function of the protein "TRIM22" (E3 ubiquitin-protein ligase TRIM22) of human?	Yes, the protein TRIM22 (E3 ubiquitin-protein ligase TRIM22) of humans is a type of ubiquitin ligase, which means it plays a crucial role in ubiquitination - the process of adding ubiquitin molecules to proteins. TRIM22 is involved in regulating immune responses by modulating the activity of interferons (proteins that help the body fight viral infections). Specifically, TRIM22 targets and degrade…	DEP
EPCAM	Can you tell me the function of the protein "EPCAM" (Epithelial cell adhesion molecule) of human?	The function of the protein EPCAM (Epithelial cell adhesion molecule) in humans is to maintain the integrity of epithelial tissues by promoting cell-cell adhesion. It is also involved in regulating cell proliferation, differentiation, and migration. EPCAM is highly expressed in epithelial cancers and is a target for cancer immunotherapy.	DEP
NCEH1	Can you tell me the function of the protein "NCEH1" (Neutral cholesterol ester hydrolase 1) of human?	NCEH1 is an enzyme that plays a crucial role in cholesterol metabolism by catalyzing the hydrolysis of neutral cholesteryl esters to free cholesterol and fatty acids. This process is important in regulating cholesterol levels in cells and tissues, and mutations in NCEH1 have been linked to disorders of cholesterol metabolism such as atherosclerosis and metabolic syndrome. Additionally, NCEH1 has …	DEP
NOLC1	Can you tell me the function of the protein "NOLC1" (Nucleolar and coiled-body phosphoprotein 1) of human?	The protein NOLC1 is involved in the regulation of ribosome biogenesis and nucleolar organization. It interacts with RNA polymerase I and play an important role in the transportation of newly synthesized ribosomal subunits from the nucleolus to the cytoplasm. It also associates with chromatin and regulates RNA polymerase II-dependent transcription. Additionally, it has been implicated in the regu…	DEP
LAMA5	Can you tell me the function of the protein "LAMA5" (Laminin subunit alpha-5) of human?	The protein LAMA5 (Laminin subunit alpha-5) of human is a component of laminin, a protein that is a major constituent of the extracellular matrix. LAMA5 binds to other laminin molecules and various cell surface receptors, such as integrin receptors, to form a network of extracellular matrix that plays a critical role in tissue development and maintenance. LAMA5 is known to be involved in cell adh…	DEP
HSPB11	Can you tell me the function of the protein "HSPB11" (Intraflagellar transport protein 25 homolog) of human?	The protein HSPB11, also known as Intraflagellar Transport Protein 25 Homolog (IFT25), is involved in the process of intraflagellar transport (IFT) in eukaryotic cells. IFT is essential for the assembly, maintenance, and function of cilia and flagella, which play critical roles in a variety of biological processes, including cell motility, sensory perception, and developmental signaling. HSPB11 i…	DEP
KIF11	Can you tell me the function of the protein "KIF11" (Kinesin-like protein KIF11) of human?	The protein KIF11, also known as Kinesin-like protein KIF11, is a microtubule-based motor protein that plays an important role in cell division or mitosis. Specifically, KIF11 is involved in the separation of duplicated chromosomes during cell division and the formation of the mitotic spindle. It helps to move chromosomes to opposite poles of the dividing cell by binding to microtubules and trans…	DEP
FGF2	Can you tell me the function of the protein "FGF2" (Fibroblast growth factor 2) of human?	FGF2 is a protein that plays an important role in regulating cell growth, proliferation, and differentiation. It is involved in a wide range of physiological processes, including embryonic development, wound healing, tissue regeneration, and angiogenesis. FGF2 is also implicated in various diseases, such as cancer, cardiovascular disease, and neurodegenerative disorders. Its action is mediated by…	DEP
NEFL	Can you tell me the function of the protein "NEFL" (Neurofilament light polypeptide) of human?	Yes, the NEFL protein is important in the formation and maintenance of the neuronal cytoskeleton, which provides structural support and regulates axonal transport within neurons. It also plays a role in axonogenesis and synaptic plasticity, and has been linked to the development of neurodegenerative diseases such as Alzheimer's and Parkinson's.	DEP
CDK1	Can you tell me the function of the protein "CDK1" (Cyclin-dependent kinase 1) of human?	CDK1 is a protein involved in regulating the cell cycle and cell division processes in humans. Specifically, it is a type of cyclin-dependent kinase that is responsible for initiating the G2/M transition during the cell cycle, allowing cells to progress from the G2 phase to the mitotic phase. This protein is critical for proper mitotic spindle formation and chromosome segregation, and its dysfunc…	DEP
PDE3A	Can you tell me the function of the protein "PDE3A" (cGMP-inhibited 3',5'-cyclic phosphodiesterase A) of human?	The protein "PDE3A" (cGMP-inhibited 3',5'-cyclic phosphodiesterase A) is an enzyme that plays a critical role in regulating the levels of cyclic adenosine monophosphate (cAMP) and cyclic guanosine monophosphate (cGMP) in cells. Specifically, PDE3A hydrolyzes cAMP and cGMP, leading to their inactivation and degradation. This is important for controlling signaling pathways that involve these cyclic…	DEP
CAVIN3	Can you tell me the function of the protein "CAVIN3" (Caveolae-associated protein 3) of human?	CAVIN3 (Caveolae-associated protein 3) is a protein found in humans that is primarily involved in the formation and maintenance of caveolae. Caveolae are small, membrane-bound invaginations found on the surface of many different cell types. They are involved in many cellular processes, including signal transduction, endocytosis, and lipid metabolism.CAVIN3 is one of several proteins that are impo…	DEP
F13A1	Can you tell me the function of the protein "F13A1" (Coagulation factor XIII A chain) of human?	The protein F13A1 (Coagulation factor XIII A chain) is an enzyme that plays a crucial role in blood clotting. It is responsible for cross-linking fibrin, a key component of blood clots, and stabilizing the clot. Additionally, F13A1 is involved in wound healing and tissue repair as it promotes the formation of a stable fibrin matrix. Deficiencies in F13A1 function can lead to bleeding disorders, s…	DEP
SUMO1P1	Can you tell me the function of the protein "SUMO1P1" (Small ubiquitin-related modifier 5) of human?	As an AI language model, I can provide information that as of now, it is unknown and there is limited research available on the specific function of SUMO1P1 (Small ubiquitin-related modifier 5) protein in human. However, it is part of the SUMO family of proteins which are involved in several cellular processes such as gene expression and the regulation of protein activity, and it is possible that…	DEP
GULP1	Can you tell me the function of the protein "GULP1" (PTB domain-containing engulfment adapter protein 1) of human?	The protein GULP1 (PTB domain-containing engulfment adapter protein 1) plays a role in mediating the engulfment and clearance of apoptotic cells by phagocytes. It functions as an adapter protein, linking apoptotic cells to phagocytic receptors on the surface of phagocytic cells, thus facilitating efficient clearance of apoptotic cells and preventing chronic inflammation. GULP1 has also been impli…	DEP
CTSD	Can you tell me the function of the protein "CTSD" (Cathepsin D) of human?	The protein CTSD (Cathepsin D) functions as a lysosomal aspartic protease involved in the degradation of various cellular proteins, including extracellular matrix proteins, intracellular proteins, and peptides. It plays a critical role in protein turnover, antigen processing, cell signaling, and apoptosis. CTSD has also been implicated in several pathological conditions, including cancer, Alzheim…	DEP
TACSTD2	Can you tell me the function of the protein "TACSTD2" (Tumor-associated calcium signal transducer 2) of human?	TACSTD2, also known as EpCAM (Epithelial cell adhesion molecule), is a cellular adhesion molecule that is present in many epithelial tissues. It plays a key role in maintaining the structural integrity of epithelial tissues by mediating homophilic cell-cell interactions. Additionally, TACSTD2 is involved in a variety of cellular processes, such as signaling, proliferation, migration, and differen…	DEP
DTNA	Can you tell me the function of the protein "DTNA" (Dystrobrevin alpha) of human?	DTNA (Dystrobrevin alpha) is a protein that is involved in maintaining the stability of skeletal muscle tissue. It is a component of the dystrophin-associated protein complex (DPC), which interacts with the cytoskeleton to provide structural support to muscle cells. DTNA anchors the DPC to the sarcolemma, the plasma membrane of skeletal muscle fibers, and helps to regulate the flow of calcium ion…	DEP
NDUFAB1	Can you tell me the function of the protein "NDUFAB1" (Acyl carrier protein, mitochondrial) of human?	The protein NDUFAB1 (Acyl carrier protein, mitochondrial) of human is a component of complex I, which is involved in oxidative phosphorylation and electron transport in the mitochondria. NDUFAB1 functions as an acyl carrier protein, which is responsible for the transfer of acyl groups between enzymes involved in fatty acid synthesis and degradation pathways. It also plays a role in the biosynthes…	DEP
MXRA7	Can you tell me the function of the protein "MXRA7" (Matrix-remodeling-associated protein 7) of human?	The exact function of MXRA7 is not fully understood, but it is known to be involved in matrix remodeling, which is the process of breaking down and rebuilding the extracellular matrix (ECM) that surrounds cells in tissues. MXRA7 is believed to play a role in cell signaling, cell adhesion, and modulation of the immune response. It may also be involved in the development and progression of certain …	DEP
DRAP1	Can you tell me the function of the protein "DRAP1" (Dr1-associated corepressor) of human?	DRAP1 (Dr1-associated corepressor) is a transcriptional co-repressor protein that plays a role in the regulation of gene expression. It is a member of the DR1 family of proteins and is known to interact with several transcription factors, including Sp1 and E2F1. DRAP1 is involved in the negative regulation of target genes, helping to switch them off when they are not required, for example in norm…	DEP
KRT10	Can you tell me the function of the protein "KRT10" (Keratin, type I cytoskeletal 10) of human?	KRT10 is a protein that encodes the keratin 10 protein, which is a type I intermediate filament protein that is found in the skin's cornified cell envelope. This protein is important for the structural integrity and strength of the epidermis and forms the keratinocyte's cytoskeleton. Mutations in the KRT10 gene are associated with various skin disorders, including epidermolytic hyperkeratosis and…	DEP
KRT28	Can you tell me the function of the protein "KRT28" (Keratin, type I cytoskeletal 28) of human?	The protein KRT28 belongs to the keratin family of proteins and is involved in the formation of the cellular cytoskeleton, providing structural support to various tissues in the body. Specifically, KRT28 is expressed in the hair cortex, where it contributes to the strength and elasticity of individual hair fibers. It also plays a role in protecting the hair from damage caused by environmental fac…	DEP
KRT27	Can you tell me the function of the protein "KRT27" (Keratin, type I cytoskeletal 27) of human?	KRT27 encodes a type I keratin protein that is expressed in the hair follicles and other epithelial tissues. It functions as a structural protein, providing strength and support to the cells and tissues it is a part of. In hair follicles, KRT27 is important for the formation and maintenance of the hair shaft. It also contributes to the barrier function of the skin by helping to maintain the integ…	DEP
KRT25	Can you tell me the function of the protein "KRT25" (Keratin, type I cytoskeletal 25) of human?	The protein KRT25 is a member of the keratin family, which are structural proteins that help provide strength and resilience to cells in various tissues of the body, including the skin, hair, and nails. KRT25 specifically is involved in the formation of hair fibers and is most highly expressed in the hair follicles of the scalp. It may also have a role in protecting hair from damage or stress.	DEP
MX1	Can you tell me the function of the protein "MX1" (Interferon-induced GTP-binding protein Mx1) of human?	The protein MX1 is a GTPase that belongs to the dynamin superfamily and is an interferon-induced anti-viral protein. It is primarily involved in host defense against viral infections by inhibiting the replication of a variety of RNA viruses. MX1 is present in the cytoplasm and nuclear envelope of cells and functions by binding to viral nucleocapsids, inhibiting their uncoating and preventing the …	DEP
ASXL2	Can you tell me the function of the protein "ASXL2" (Putative Polycomb group protein ASXL2) of human?	ASXL2 is a member of the Polycomb group (PcG) of proteins, which play important roles in regulating gene expression and maintaining cell identity during development. Specifically, ASXL2 is thought to be involved in repressing the expression of certain genes by recruiting a complex of PcG proteins to specific areas of DNA. It has also been suggested to play a role in DNA damage response and inflam…	DEP
PTPN6	Can you tell me the function of the protein "PTPN6" (Tyrosine-protein phosphatase non-receptor type 6) of human?	The function of the protein PTPN6 (Tyrosine-protein phosphatase non-receptor type 6) in humans is to act as a negative regulator of cellular signaling pathways. It functions by removing phosphate groups from specific tyrosine residues on target proteins, thereby deactivating them. This protein is essential for regulating the immune system and preventing the development of autoimmune diseases. Add…	DEP
TMEM164	Can you tell me the function of the protein "TMEM164" (Transmembrane protein 164) of human?	TMEM164 is a transmembrane protein that plays a role in the regulation of lysosomal function. The protein is involved in the transport of hydrolases to lysosomes and is required for lysosomal acidification. Mutations in the TMEM164 gene have been associated with a rare genetic disorder called congenital disorder of glycosylation type IIQ (CDG-IIQ) which is characterized by delayed development, in…	DEP
C1QBP	Can you tell me the function of the protein "C1QBP" (Complement component 1 Q subcomponent-binding protein, mitochondrial) of human?	The protein C1QBP is involved in several biological processes including apoptosis, transcriptional regulation, RNA splicing, and mitochondrial biogenesis. It binds to the C1q complement component and regulates its activation. C1QBP also plays a role in the regulation of mitochondrial DNA replication and transcription, and is involved in the maintenance of mitochondrial structure and function. Add…	DEP
PAMR1	Can you tell me the function of the protein "PAMR1" (Inactive serine protease PAMR1) of human?	The protein PAMR1, also known as Inactive serine protease PAMR1, is believed to be involved in the regulation of apoptotic cell death. Its precise function is not yet fully understood, but studies suggest that it may act as an inhibitor of apoptosis under certain conditions, and may play a role in the response to cellular stress. Furthermore, PAMR1 has also been shown to have a role in the regula…	DEP
SMG5	Can you tell me the function of the protein "SMG5" (Protein SMG5) of human?	Yes, SMG5 is a human protein that is involved in the regulation of mRNA decay. Specifically, SMG5 is a member of the SMG family of proteins that are necessary for the nonsense-mediated mRNA decay (NMD) pathway. NMD is a crucial mechanism that eliminates mRNAs containing premature termination codons (PTCs), which can cause truncated or non-functional proteins. SMG5 plays a role in the assembly of …	DEP
SEC61G	Can you tell me the function of the protein "SEC61G" (Protein transport protein Sec61 subunit gamma) of human?	The protein transport protein Sec61 subunit gamma, also known as SEC61G, is a component of the protein translocation complex in the endoplasmic reticulum (ER) membrane. It forms a heterotrimeric complex with Sec61 alpha and Sec61 beta, and together they form a protein-conducting channel that allows newly synthesized proteins to cross the ER membrane and enter the secretory pathway. SEC61G is requ…	DEP
PLAC9	Can you tell me the function of the protein "PLAC9" (Placenta-specific protein 9) of human?	As an AI language model, I don't have access to the most up-to-date scientific research. However, according to the limited information available, PLAC9 is a placenta-specific protein, meaning it is mainly expressed in the placenta during pregnancy. Its exact function is not well understood, but it has been suggested to play a role in placental development and fetal growth.	DEP
UHRF1	Can you tell me the function of the protein "UHRF1" (E3 ubiquitin-protein ligase UHRF1) of human?	The protein UHRF1 serves as an E3 ubiquitin-protein ligase in humans. Its main function is to target specific proteins for degradation through the ubiquitin-proteasome pathway, which is an important mechanism for regulating the turnover of cellular proteins. UHRF1 has also been linked to other processes such as DNA methylation, cell cycle regulation, and chromatin modification. Specifically, UHRF…	DEP
ORC3	Can you tell me the function of the protein "ORC3" (Origin recognition complex subunit 3) of human?	The ORC3 protein is part of the Origin Recognition Complex (ORC), a conserved six-subunit complex that plays a crucial role in the initiation of DNA replication in eukaryotes. ORC3 specifically functions as a scaffold protein that helps to anchor other subunits of the ORC complex to chromatin during the G1 phase of the cell cycle. It is required for the loading of the replicative helicase MCM com…	DEP
MYO1B	Can you tell me the function of the protein "MYO1B" (Unconventional myosin-Ib) of human?	The protein MYO1B is an unconventional myosin-Ib that plays a role in cellular processes such as intracellular transport and cell migration. Specifically, MYO1B is involved in the movement of vesicles and organelles along actin filaments within cells. It also plays a role in the regulation of the actin cytoskeleton, which is essential for cell shape, division, and movement. Dysregulation of MYO1B…	DEP
ISG15	Can you tell me the function of the protein "ISG15" (Ubiquitin-like protein ISG15) of human?	ISG15 (Interferon-stimulated gene 15) is a protein that functions as an ubiquitin-like modifier, which means it can covalently attach to other proteins and modify their function. ISG15 is induced by interferon signaling in response to viral or bacterial infection, and it plays a key role in the innate immune response against pathogens.ISG15 modification of target proteins, known as ISGylation, ca…	DEP
CRNN	Can you tell me the function of the protein "CRNN" (Cornulin) of human?	CRNN (Cornulin) is a protein that is expressed in various tissues, including the skin, oral cavity and esophagus. Its function is to maintain the integrity of epithelial cells, which are cells that line the surfaces of organs and structures in the body. Specifically, CRNN helps to strengthen the barrier function of the skin and other epithelial tissues by promoting cell adhesion and regulating th…	DEP
IGHV1-46	Can you tell me the function of the protein "IGHV1-46" (Immunoglobulin heavy variable 1-46) of human?	The function of IGHV1-46 protein is to code for a specific region in the antibodies (immunoglobulin) of humans. These antibodies play a crucial role in the immune system to recognize and neutralize various foreign substances, such as bacteria, viruses, and toxins, by binding to them. The IGHV1-46 protein is involved in the generation of the diverse repertoire of antibodies through somatic recombi…	DEP
SLC44A2	Can you tell me the function of the protein "SLC44A2" (Choline transporter-like protein 2) of human?	Yes, SLC44A2 (Choline transporter-like protein 2) is a protein that functions as a transporter of choline, which is an essential nutrient required for the synthesis of the neurotransmitter acetylcholine, cell membrane phospholipids, and other important metabolites. SLC44A2 is primarily expressed in the liver, kidneys, and placenta, and its activity is critical for maintaining normal choline level…	DEP
LMCD1	Can you tell me the function of the protein "LMCD1" (LIM and cysteine-rich domains protein 1) of human?	The protein LMCD1 (LIM and cysteine-rich domains protein 1) of human is a transcriptional regulator that plays a role in cardiac hypertrophy and development. It is involved in the regulation of genes related to cell differentiation, proliferation, and survival, as well as in the regulation of sarcomeric gene expression in cardiomyocytes. LMCD1 has also been linked to the regulation of skeletal mu…	DEP
MFAP2	Can you tell me the function of the protein "MFAP2" (Microfibrillar-associated protein 2) of human?	Microfibrillar-associated protein 2 (MFAP2) is a protein that is involved in the organization and maintenance of elastic fibers in tissues such as the skin, lungs, and blood vessels. It is a member of the microfibril-associated glycoprotein (MAGP) family and has been shown to interact with fibrillin-1, a key component of elastic fibers. MFAP2 is believed to play a role in regulating the assembly …	DEP
TES	Can you tell me the function of the protein "TES" (Testin) of human?	The protein TES (Testin) of human is involved in the regulation of actin cytoskeleton dynamics and cell adhesion. It is also known to act as a tumor suppressor in various cancers. In addition, TES is involved in the regulation of gene expression and DNA repair processes. Its function is multifaceted and diverse, and further research is needed to fully understand its role in human biology.	DEP
TYMP	Can you tell me the function of the protein "TYMP" (Thymidine phosphorylase) of human?	TYMP is a protein that plays a key role in the process of DNA replication and repair by catalyzing the reversible phosphorylation of the nucleoside thymidine, thereby converting it to thymine and releasing phosphate. TYMP also plays a role in angiogenesis, the process of forming new blood vessels, by regulating the levels of certain growth factors in the blood. Additionally, TYMP is involved in t…	DEP
CRBN	Can you tell me the function of the protein "CRBN" (Protein cereblon) of human?	The protein CRBN (Cereblon) of human has multiple functions. One of the most well-known functions is its role as a substrate receptor for the CRL4 E3 ubiquitin ligase complex, which plays a crucial role in the regulation of cell division and differentiation. CRBN also controls ion channel activity, particularly in the brain, and has been implicated in synaptic transmission, learning, and memory. …	DEP
ADIRF	Can you tell me the function of the protein "ADIRF" (Adipogenesis regulatory factor) of human?	ADIRF (Adipogenesis regulatory factor) is a protein that plays a crucial role in the regulation of adipogenesis, the process by which immature cells differentiate into mature adipocytes or fat cells. It acts as a transcriptional regulator of adipocyte differentiation by enhancing the expression of a number of adipogenic genes, including PPARγ and C/EBPα, and promoting the accumulation of lipid dr…	DEP
OAS1	Can you tell me the function of the protein "OAS1" (2'-5'-oligoadenylate synthase 1) of human?	The protein OAS1 (2'-5'-oligoadenylate synthase 1) is an enzyme in humans that is involved in innate antiviral immune response. It catalyzes the synthesis of 2'-5'-oligoadenylates, which in turn activate the RNase L enzyme, leading to the degradation of viral RNA and inhibition of viral replication. OAS1 is induced by interferons and is highly expressed in immune cells such as macrophages and den…	DEP
ITGA11	Can you tell me the function of the protein "ITGA11" (Integrin alpha-11) of human?	Integrin alpha-11 (ITGA11) is a protein that is involved in cell adhesion and signaling. Specifically, ITGA11 is a transmembrane receptor that binds to extracellular matrix (ECM) proteins such as collagens. In human, it is expressed primarily in fibroblasts and smooth muscle cells. It plays a role in modulating cell proliferation, migration, and differentiation, as well as in tissue remodeling pr…	DEP
CA3	Can you tell me the function of the protein "CA3" (Carbonic anhydrase 3) of human?	The protein CA3 (Carbonic anhydrase 3) in humans is an enzyme that catalyzes the reversible hydration of carbon dioxide to bicarbonate. It is expressed mainly in skeletal and cardiac muscles, where it plays a critical role in regulating intracellular pH and removing excess CO2 produced during muscle contraction. Additionally, CA3 has been implicated in several physiological processes, including a…	DEP
SUMO1	Can you tell me the function of the protein "SUMO1" (Small ubiquitin-related modifier 1) of human?	The function of SUMO1 (Small ubiquitin-related modifier 1) protein in humans is to modify other proteins in a process known as sumoylation. Sumoylation helps to regulate a wide range of cellular processes, including DNA repair, transcriptional regulation, and protein stability. Additionally, SUMO1 has been implicated in several disease processes, including cancer, neurodegenerative disorders, and…	DEP
ANK1	Can you tell me the function of the protein "ANK1" (Ankyrin-1) of human?	ANK1 is a protein that helps to stabilize and organize the cell membrane in red blood cells. It is also involved in the attachment of the cytoskeleton to the plasma membrane and plays a role in regulating the shape and flexibility of the cells. Mutations in ANK1 can cause hereditary spherocytosis, a disorder characterized by abnormal red blood cells that are more fragile and prone to destruction,…	DEP
CFHR5	Can you tell me the function of the protein "CFHR5" (Complement factor H-related protein 5) of human?	The exact function of CFHR5 is not yet fully understood. However, studies suggest that CFHR5 might be involved in the regulation of the complement system, which is a part of the immune system that helps to recognize and destroy invading pathogens. CFHR5 appears to bind to complement proteins and may modulate the activity of the complement system in certain situations. Some studies have also sugge…	DEP
CASP1	Can you tell me the function of the protein "CASP1" (Caspase-1) of human?	Caspase-1 is an enzyme/protein that is involved in the process of programmed cell death, also called apoptosis. It plays a crucial role in inflammation and immunity. Specifically, it is a key enzyme that activates pro-inflammatory cytokines, such as interleukin-1 beta (IL-1β) and -18 (IL-18), by cleaving the precursor proteins. These cytokines are involved in the body's response to infection and …	DEP
PLXND1	Can you tell me the function of the protein "PLXND1" (Plexin-D1) of human?	The protein PLXND1 (Plexin-D1) of human is a transmembrane receptor protein that is involved in various cellular processes such as axon guidance, angiogenesis, cell migration, and tumor progression. It functions as a receptor for the semaphorin protein family, which regulates the guidance and migration of developing neurons, and also interacts with other signaling pathways and proteins to regulat…	DEP
BCAP29	Can you tell me the function of the protein "BCAP29" (B-cell receptor-associated protein 29) of human?	BCAP29 is a protein found in humans that is associated with B-cell receptor signaling. It contains a single transmembrane domain, suggesting that it is an integral membrane protein. BCAP29 has been found to be involved in the trafficking of B-cell receptor associated proteins to the plasma membrane, and it may also play a role in the regulation of apoptosis, or programmed cell death. Additionally…	DEP
TPD52	Can you tell me the function of the protein "TPD52" (Tumor protein D52) of human?	The TPD52 protein (Tumor protein D52) is believed to play a role in various cellular processes including cell cycle progression, cell proliferation, and migration. Additionally, TPD52 has been associated with different types of cancer, including breast, prostate, and ovarian cancer. Studies suggest that TPD52 may contribute to tumorigenesis by promoting tumor cell survival and resistance to chemo…	DEP
APOBEC3G	Can you tell me the function of the protein "APOBEC3G" (DNA dC->dU-editing enzyme APOBEC-3G) of human?	The APOBEC3G protein functions as a DNA editing enzyme that performs cytidine-to-uridine deamination (dC->dU) in single-stranded DNA. This process helps to restrict the replication of retroviruses, including HIV, by introducing mutations in their genome. It is part of the innate immune response that protects cells from viral infections. The APOBEC3G protein is predominantly expressed in immune ce…	DEP
IGHV3-30-5	Can you tell me the function of the protein "IGHV3-30-5" (Immunoglobulin heavy variable 3-30-5) of human?	As an AI language model, I do not have access to the latest research or data on proteins. However, I can explain generally that IGHV3-30-5 is a protein that belongs to the immunoglobulin family and is involved in the immune system's response to infection and disease. It is produced by B cells and has a crucial role in recognizing and binding to specific antigens, such as pathogens or toxins, to i…	DEP
POLA1	Can you tell me the function of the protein "POLA1" (DNA polymerase alpha catalytic subunit) of human?	Yes, the function of the protein POLA1 (DNA polymerase alpha catalytic subunit) of human is to catalyze the polymerization of DNA during DNA replication. It also has a role in repair of DNA damage and recombination. POLA1 works in a complex with a regulatory subunit (POLA2) to form the DNA polymerase alpha-primase complex, which is responsible for initiating the synthesis of DNA during replicatio…	DEP
LIMA1	Can you tell me the function of the protein "LIMA1" (LIM domain and actin-binding protein 1) of human?	LIMA1, also known as LIM domain and actin-binding protein 1, is a protein that plays important roles in regulating actin dynamics and cell migration. It contains three LIM domains and an actin-binding domain, which allows it to interact with actin filaments and regulate their organization and dynamics. LIMA1 is essential for proper development of the nervous system, as well as for the maintenance…	DEP
DNASE2	Can you tell me the function of the protein "DNASE2" (Deoxyribonuclease-2-alpha) of human?	The protein DNASE2 is an enzyme that breaks down and cleaves DNA molecules into smaller fragments. It is involved in the degradation and clearance of cellular and extracellular DNA that is released during normal cell turnover, apoptosis, and other cellular processes. DNASE2 is also important in the immune response, as it can degrade foreign DNA from invading microorganisms, preventing their repli…	DEP
CAPRIN1	Can you tell me the function of the protein "CAPRIN1" (Caprin-1) of human?	Yes, CAPRIN1, also known as Caprin-1, is a protein found in humans that is involved in many cellular processes, including transcriptional regulation, RNA processing, protein translation, and the regulation of mRNA stability. It plays a critical role in various cellular functions such as mRNA localization, translation, and stress granule formation. CAPRIN1 is also important for the development and…	DEP
PSMB5	Can you tell me the function of the protein "PSMB5" (Proteasome subunit beta type-5) of human?	The protein PSMB5, also known as Proteasome subunit beta type-5, is a component of the proteasome complex, which is responsible for degrading and removing damaged, misfolded, or unnecessary proteins within cells. Specifically, PSMB5 is a catalytic subunit of the 20S proteasome, which is involved in the hydrolysis of peptide bonds in the targeted proteins. This process is essential for maintaining…	DEP
ANP32B	Can you tell me the function of the protein "ANP32B" (Acidic leucine-rich nuclear phosphoprotein 32 family member B) of human?	ANP32B is a multifunctional protein that plays important roles in various cellular processes such as DNA repair, transcriptional regulation, apoptosis, and cell cycle control. It is a nuclear protein that contains acidic leucine-rich domains, and it has been shown to interact with several other proteins involved in DNA repair and transcriptional regulation. Additionally, ANP32B has been implicate…	DEP
HMGB3	Can you tell me the function of the protein "HMGB3" (High mobility group protein B3) of human?	HMGB3 is a member of the high mobility group (HMG) protein family, which are important chromosomal proteins that play a role in DNA binding and transcriptional regulation. Specifically, HMGB3 has been shown to interact with DNA, bend it, and promote the assembly of protein complexes involved in DNA replication, transcription, and repair. HMGB3 has also been implicated in several cellular processe…	DEP
KYNU	Can you tell me the function of the protein "KYNU" (Kynureninase) of human?	The protein KYNU (Kynureninase) of human functions as an enzyme that catalyzes the conversion of L-kynurenine into anthranilic acid in the kynurenine pathway of tryptophan metabolism. This pathway is important for the production of nicotinamide adenine dinucleotide (NAD+) and L-tryptophan plays a crucial role in a range of physiological processes, including immune function, neurotransmission, and…	DEP
DENND1B	Can you tell me the function of the protein "DENND1B" (DENN domain-containing protein 1B) of human?	DENND1B is a protein that plays a role in intracellular trafficking and signaling pathways. Specifically, it belongs to the DENN (differentially expressed in normal and neoplastic cells) protein family and contains a DENN domain, which is involved in activating small GTPases that regulate vesicle trafficking. DENND1B has been shown to regulate the trafficking of the glucose transporter GLUT1 and …	DEP
SF3A3	Can you tell me the function of the protein "SF3A3" (Splicing factor 3A subunit 3) of human?	Yes, SF3A3 is a protein involved in the splicing process of pre-mRNA molecules in human cells. Specifically, it is a subunit of the splicing factor 3A complex, which is responsible for recognizing and binding to specific sequences in the pre-mRNA molecule and facilitating the assembly of the spliceosome complex. The spliceosome then removes introns and splices together exons to create the mature …	DEP
ACE	Can you tell me the function of the protein "ACE" (Angiotensin-converting enzyme) of human?	ACE (Angiotensin-converting enzyme) is an important protein in the human body that plays a critical role in the regulation of blood pressure and the balance of fluids and electrolytes in the body. Its main function is to convert the hormone angiotensin I into angiotensin II, which is a potent vasoconstrictor that helps to regulate blood pressure by constricting blood vessels. Additionally, ACE al…	DEP
CARD16	Can you tell me the function of the protein "CARD16" (Caspase recruitment domain-containing protein 16) of human?	The function of the protein CARD16 (Caspase recruitment domain-containing protein 16) in humans is not yet fully understood. However, studies have suggested that it may play a role in regulating the activity of certain immune cells, such as macrophages and dendritic cells. Additionally, it has been linked to the development and progression of certain diseases, including inflammation and cancer. F…	DEP
SYK	Can you tell me the function of the protein "SYK" (Tyrosine-protein kinase SYK) of human?	The protein SYK (Tyrosine-protein kinase SYK) is involved in intracellular signaling pathways, where it plays a role in the regulation of various cellular processes such as proliferation, differentiation, survival, and apoptosis. SYK acts as a kinase that phosphorylates downstream targets and is predominantly expressed in hematopoietic cells, where it plays a critical role in modulating adaptive …	DEP
ANKK1	Can you tell me the function of the protein "ANKK1" (Ankyrin repeat and protein kinase domain-containing protein 1) of human?	The function of the ANKK1 protein in humans is still not fully understood. However, research suggests that it may play a role in regulating dopamine signaling in the brain and could be associated with addiction and neuropsychiatric disorders. ANKK1 has also been shown to interact with other proteins involved in signal transduction pathways and cellular differentiation.	DEP
DDX60	Can you tell me the function of the protein "DDX60" (Probable ATP-dependent RNA helicase DDX60) of human?	DDX60 is an ATP-dependent RNA helicase protein that plays a critical role in detecting and responding to viral infections. It is a part of the innate immune system and helps in the induction of type I interferon (IFN) responses to viral infections. DDX60 recognizes viral RNA and unwinds it, facilitating the production of type I IFNs, which in turn inhibits viral replication and spread. Therefore,…	DEP
PROCR	Can you tell me the function of the protein "PROCR" (Endothelial protein C receptor) of human?	The protein PROCR (Endothelial protein C receptor) functions as a receptor for activated protein C (APC) and is involved in the regulation of blood clotting and inflammation. When PROCR binds to APC, it enhances the anticoagulant effects of APC and inhibits blood clotting. PROCR also plays a role in maintaining normal endothelial cell function and preventing endothelial dysfunction. Additionally,…	DEP
CSNK2A2	Can you tell me the function of the protein "CSNK2A2" (Casein kinase II subunit alpha') of human?	CSNK2A2 protein (Casein kinase II subunit alpha') is a serine/threonine kinase that plays a critical role in various cellular processes, including DNA repair, cell survival, and gene expression. It is involved in the regulation of cell growth and proliferation, apoptosis, and the cell cycle. CSNK2A2 protein also phosphorylates several transcription factors, including c-Myc, p53, and NF-κB, thereb…	DEP
EIF1	Can you tell me the function of the protein "EIF1" (Eukaryotic translation initiation factor 1) of human?	The protein EIF1 is a eukaryotic translation initiation factor that is involved in the initiation of protein synthesis in eukaryotic cells. Its main functions include binding to the 40S ribosome subunit to help position the initiator tRNA at the translation start site, and promoting the dissociation of the ribosome-associated inhibitory factor eIF3 to allow for efficient translation initiation. A…	DEP
DDR1	Can you tell me the function of the protein "DDR1" (Epithelial discoidin domain-containing receptor 1) of human?	The protein DDR1 (Epithelial discoidin domain-containing receptor 1) is a receptor tyrosine kinase that plays a crucial role in cell adhesion, migration, and proliferation. DDR1 functions as a collagen receptor and is involved in regulating the extracellular matrix (ECM) by mediating collagen-induced signaling pathways. It also plays a role in wound healing, tissue repair, and cell differentiatio…	DEP
[truncated: 14,018 more rows]

## Sheet: Table S1B
Table S1B. Second question in interpretation module of querying DEPs, DPPs, DEGs, FMGs and single-cell markers.
Gene	Question	Answer	Cancer/Cervical cancer	Source	Judgement
[truncated: 19,842 more rows]

## Sheet: Table S1C
Table S1C. Third question in interpretation module of querying DEPs, DPPs, DEGs, FMGs and single-cell markers.
[truncated: 19,847 more rows]

[truncated: 7 more sheets: Table S1D, Table S1E, Table S1F, Table S1G, Table S1H, Table S1I, Table S1J]
