# Supplementary material for: Large language models completely understand molecular characteristics of squamous cervical cancer
Source: Research Square preprint supplement (doi:10.21203/rs.3.rs-2855719/v1), 2023-05-30
Supplement: Supplementary file 7 [file fbe5524e083dc31bdc5e8436.xlsx]

## Sheet: Table S2
Table S2. The clinical characteristics of 114 SCC patients.
Patient	Basic information																						HPV tests						Routine analysis of blood									Urinalysis				Liver function				Renal function			Blood biochemistry
	Gender	Age	Date of surgery	Tumor type	2009FIGO Stage	Grade	Final tumor diameter	Gynecological tumor diameter	Imaging tumor volume	Imaging tumor diameter	Pathological tumor diameter	Cervical myometrial infiltration depth	LNM	Total number of lymph node biopsies	Total number of positive lymph node biopsies	Lymph-vascular space invasion	Marry_Age	Gestation	Production	Abortion	Live	Menopause_Age	HPV test（yes,no)	HPV (+,-)	HPV type test	HPV16	HPV18	Other HPV types	Blood routine (yes,no)	WBC (10^9/L)	RBC (10^12/L)	PLT (10^9/L)	HB (g/L)	Neutrophil (10^9/L)	Lymphocyte (10^9/L)	Cell proportion (%)	Eosinophil(10^9/L)	Urinalysis(yes,no)	urine protein	urine glucose	urine specific gravity	liver function (yes,no)	ALT(U/L)	AST(U/L)	ALB/GLB	renal function (yes,no)	UREA (mmol/L)	creatinine (μmol/L)	blood lipid (yes,no)
P001	M	48	2019-01-29	Squamous cancer	IIB	G2	3.5		23.064	3.1		2	0	44	0	NA	23	3	1	2	1	NA	no						yes	4.83	3.85	293	316	2.6	1.75	36.2	0.05	yes	-	-	1.012	yes	16	22	1.42	yes	3.6	50	yes
P002	M	57	2019-03-20	Squamous cancer	IIB	G2	4.5	4.5	43.008	4.2		3	0	20	0	NA	23	2	1	1	1	50	no						yes	7.26	3.44	269	327	4.13	2.68	36.9	0.6	yes	-	-	1.018	yes	18	18	1.52	yes	6.26	42	yes
P003	M	66	2019-02-28	Squamous cancer	IIA1	G2	3	NA	8.748	2.7	3	3	0	29	0	NA	24	4	2	2	2	56	no						yes	9.85	3.35	197	333	7.96	0.91	9.2	0	yes	-	-	1.015	yes	10	14	1.43	yes	5.97	63	yes
P004	M	53	2019-06-17	Squamous cancer	IB1	G2	3.6	4	24.336	3.6	3	3	0	36	0	NA	27	3	2	1	2	NA	no						yes	4.37	2.93	117	305	2.63	1.15	26.3	0.31	yes	-	-	1.018	yes	18	28	1.34	yes	7.01	74	yes
P005	M	40	2019-07-29	Squamous cancer	IB1	G3	2.5		6.936	2.4	1.3	1	0	27	0	0	26	2	1	1	1	NA	yes	+	1	1			yes	7.21	3.63	177	340	4.76	1.71	23.7	0.02	yes	-	-	1.022	yes	12	14	1.73	yes	3.21	48	yes
P006	M	40	2019-08-05	Squamous cancer	IIA1	G2	3	3	8.1	2.5		3	0	24	0	0	24	4	3	1	3	NA	no						yes	4.74	4.16	124	345	2.9	1.39	29.3	0.12	yes	-	-	1.017	yes	10	20	1.55	yes	3.6	46	yes
P007	M	56	2019-07-17	Squamous cancer	IB2	G3	4.5	4	52.164	4.6		4	0	22	0	1	22	3	2	1	2	54	yes	+	1			31	yes	4.2	4.86	170	320	2.49	1.37	32.6	0.12	yes	-	-	1.021	yes	14	18	1.8	yes	5.7	59	yes
P008	M	40	2019-08-14	Squamous cancer	IB1	G3	1.5		1.573	1.3		2	0	19	0	0	19	4	1	3	1	NA	yes	+	1	1		35、52、53、58	yes	6.03	4.02	225	303	3.2	2.27	37.6	0.16	yes	-	-	1.02	yes	15	20	1.49	yes	3.5	65	yes
P009	M	51	2019-09-03	Squamous cancer	IIA2	G2	5		26.784	3.2	5	3	0	48	0	0	24	5	2	3	2	49	yes	+	1	1			yes	6.08	4.15	175	323	3.53	2.95	33.7	0.12	yes	-	-	1.012	yes	10	13	1.33	yes	3.2	69	yes
P010	M	64	2019-09-16	Squamous cancer	IB1	G1	3	4			1.5	0	0	18	0	0	22	4	3	1	3	40	yes	+	1			33	yes	5.76	4.66	242	334	3.01	2.17	37.7	0.06	yes	±	-	1.014	no				no			no
P011	M	50	2015-06-02	Squamous cancer	IIA1	G3	4	4			2.5	2	1	16	1	1	NA	1	1	0	1	NA	no						yes	5.71	4.52	251	129	3.05	2.22	NA	0.09	yes	-	-	1.015	yes	26	22	1.96	yes	4	63	yes
P012	M	39	2015-07-07	Squamous cancer	IB1	G3	4	2	7.225	2.5	4	3	1	22	1	1	NA	5	3	2	3	NA	no						yes	4.21	3.88	240	125	2.53	1.36	NA	0.04	yes	-	-	1.003	yes	11	8	1.82	yes	3.81	54	yes
P013	M	58	2015-08-24	Squamous cancer	IB1	G2	4	0	50.048	4.6	3.6	3	0	15	0	0	22	7	4	3	4	42	no						yes	4.29	4.49	145	128	2.79	1.09	NA	0.19	yes	-	-	1.015	yes	10	14	1.69	yes	3.88	55	yes
P014	M	37	2015-08-28	Squamous cancer	IB1	G3		2.5	5.85	2.6	4	2	0	17	0	0	22	3	2	2	2	NA	no						yes	7.28	4.21	230	121	4.42	2.06	NA	0.34	yes	-	-	1.015	yes	11	17	1.74	yes	2.65	47	yes
P015	M	48	2015-09-06	Squamous cancer	IB1	G2	3	0			3	2	0	21	0	0	NA	4	2	2	2	NA	no						yes	5.5	4.13	256	113	3.1	1.97	NA	0.14	yes	-	-	1.005	yes	11	14	1.83	yes	5.1	70	yes
P016	M	30	2015-09-29	Squamous cancer	IB1	G3		4	9.396	2.9	3.3	3	0	18	0	0	22	2	2	0	2	NA	yes	-	1				yes	8.75	4.27	385	127	5.74	2.29	NA	0.16	yes	-	-	1.025	yes	15	16	1.55	yes	4.5	56	yes
P017	M	39	2015-10-15	Squamous cancer	IB2	G2	5	3	48.05	5	5.5	4	0	37	0	0	17	4	2	1	2	NA	no						yes	9.5	3.74	263	113	6.55	1.43	NA	0.05	yes	-	-	1.025	yes	6	14	1.37	yes	3.37	56	yes
P018	M	46	2015-12-01	Squamous cancer	IB1	G3	4		49.248	3.8	4	4	1	23	2	1	25	6	1	5	1	NA	yes	+	1	1			yes	2.93	3.63	251	117	1.34	1.25	NA	0.18	yes	-	-	1.01	yes	9	14	1.96	yes	3.1	74	yes
P019	M	62	2016-07-19	Squamous cancer	IIA2	G2		5	1.815	1.5	2.8	1	0	21	0	0	22	4	2	2	2	50	no						yes	4.04	3.86	233	121	1.61	2.1	NA	0.06	yes	-	-	1.03	yes	17	19	0.87	yes	7	45	yes
P020	M	39	2017-05-22	NA	NA	NA	NA	NA	NA	NA	NA	NA	NA	NA	NA	NA	NA	NA	NA	NA	NA	NA	no						yes	6.28	3.99	244	117	4.24	1.73	NA	0.05	yes	-	-	1.01	yes	14	14	1.42	yes	4	61	yes
P021	M	56	2017-10-18	Squamous cancer	IB1	G3	1.2	0	0.972	1.2		2	0	31	0	0	25	1	1	0	1	53	yes	+	1	1			yes	6.46	4.47	299	141	5.6	32.8	NA	0.05	yes	-	-	1.023	yes	22	24	1.7	yes	7.67	62	yes
P022	M	35	2018-06-07	Squamous cancer	IB1	G3	1.5	3	1.89	1.5	1.3	1	0	16	0	1	22	2	1	1	1	NA	yes	+	1	1		52、58	yes	3.82	3.73	193	115	1.86	1.49	NA	0.02	yes	-	-	1.005	yes	9	21	2.1	yes	3.8	62	no
P023	M	55	2018-12-04	Squamous cancer	IB1	G1	3.5	0	74.529	4.9	3.5	4	0	16	0	0	23	1	1	0	1	46	yes	+	1	1	1		yes	7.93	4.39	294	309	6.05	1.5	NA	0.01	yes	-	-	1.008	yes	8	13	2.02	yes	4.57	69	yes
P024	M	49	2019-04-23	Squamous cancer	IIA2	G3	7	4	25.012	3.7	7	4	0	16	0	1	20	3	1	2	1	NA	yes	+	1	1			yes	6.5	4.17	428	328	3.41	2.32	35.7	0.09	yes	-	-	1.028	yes	6	13	2.11	yes	6	58	yes
P025	M	37	2019-05-16	Adenocarcinoma-like	IB2	G2	5.5	4	77.112	5.4	5.5	2	0	37	0	0	25	3	2	1	2	NA	yes	-					yes	5.8	3.77	272	326	3.16	2.02	34.8	0.06	yes	-	-	1.016	yes	21	15	1.67	yes	5.25	65	yes
P026	M	44	2019-05-17	Squamous cancer	IB1	G3	2.5	2.5	4.761	2.3	2.2	2	0	11	0	0	22	1	1	0	1	NA	yes	+	1	1	0		yes	8.81	4.48	237	333	6.45	1.93	21.9	0.05	yes	-	-	1.021	yes	8	11	1.81	yes	5.61	54	yes
P027	M	41	2019-05-21	Adenocarcinoma-like	IB2	G2	4.5	5	2.592	3.2	3.5	2	0	13	0	0	23	4	1	3	1	NA	no						yes	5.34	3.8	184	335	3.57	1.43	26.8	0.06	yes	＋	-	1.031	yes	13	16	1.81	yes	4.3	67	yes
P028	M	46	2019-07-18	Adenocarcinoma-like	IB1	G1	3	3	13.5	3	3	1	0	25	0	0	23	1	1	0	1	NA	no						yes	6.75	4.42	212	324	4.09	1.99	29.5	0.03	yes	＋	-	1.024	yes	10	15	1.71	yes	3.5	77	yes
P029	M	60	2019-09-16	Squamous cancer	IB1	G1	3.2	3	28.672	3.2	3	2	0	15	0	0	23	3	3	0	3	45	no						yes	5.25	2.67	62	342	4.6	0.38	7.3	0.02	yes	-	-	1.024	yes	21	21	1.48	yes	7	77	yes
P030	M	61	2019-09-19	Squamous cancer	IB1	G2	3	2	14.49	3	2.5	2	0	23	0	1	22	5	2	3	2	42	no						yes	5.88	4.7	260	354	3	2.37	40.3	0.07	yes	±	-	1.021	yes	15	24	1.65	yes	5.4	76	yes
P031	M	46	2019-09-23	Squamous cancer	IIA2	G3	7	7	89.093	5.3	7	2	0	25	0	0	20	2	2	0	2	NA	no						yes	7.36	4.44	380	337	5.17	1.75	23.7	0.17	yes	±	-	1.018	yes	13	20	1.07	yes	4.2	61	yes
P032	M	39	2019-09-23	Squamous cancer	IB1	G2	3	3	13.8	3	3	2	0	30	0	1	21	1	1	0	1	NA	no						yes	6.26	4.32	391	311	3.16	2.23	35.6	0.29	yes	1+	-	1.011	yes	13	18	1.36	yes	5.4	71	yes
P033	M	42	2019-09-23	Squamous cancer	IIA1	G2	3	2.5	10.626	2.3	3	2	0	18	0	1	22	2	1	1	1	NA	no						yes	5.91	4.48	235	331	4.25	1.4	23.6	0.02	yes	±	-	1.014	yes	28	36	1.41	yes	5.3	64	yes
P034	M	49	2019-09-25	Squamous cancer	IB1	G2	3.2	3	24	3.2	2.5	2	0	25	0	1	19	3	1	2	1	NA	no						yes	8.02	4.8	248	333	5.35	2.13	26.6	0.05	yes	±	-	1.019	yes	33	32	1.28	yes	4.4	61	yes
P035	M	57	2019-09-25	Squamous cancer	IB1	G2	1.5	1.5	6.422	2.6	1.5	1	0	22	0	0	20	7	3	4	3	55	yes	+	0				yes	6.94	5.16	301	325	3.69	2.65	38.2	0.07	yes	±	-	1.023	yes	49	32	1.39	yes	7.7	50	no
P036	M	59	2019-10-14	Squamous cancer	IB1	G2	3	2	16.8	2.8	3	3	0	23	0	0	23	4	1	1	3	51	no						yes	6.19	4.87	292	341	3.84	2.05	33.1	0.03	yes	-	-	1.013	yes	58	58	1.3	yes	3.9	70	yes
P037	M	38	2019-10-15	Squamous cancer	IB2	G1	6	0	153.459	5.9	5	3	1	23	2	1	21	4	3	3	1	NA	yes	+	1	1		66	yes	10.23	4.89	215	334	7.12	2.24	21.9	0.25	yes	-	-	1.009	yes	9	11	1.5	yes	3.1	59	yes
P038	M	65	2019-10-21	Squamous cancer	IB1	G3	2	2	4.864	1.9	1.5	2	0	19	0	0	25	1	1	1	0	54	no						yes	7.91	4.17	340	343	5.01	2.03	25.7	0.12	yes	±	-	1.014	yes	18	23	1.4	yes	5.5	73	yes
P039	M	45	2019-10-23	Squamous cancer	IB1	G2	2	2			1.5	1	0	25	0	0	30	3	1	2	1	NA	yes	+	1	1	0		yes	6.32	4.45	189	328	4.81	1.07	16.9	0.04	yes	-	-	1.038	yes	5	15	1.21	yes	5.1	75	no
P040	M	47	2019-10-22	Squamous cancer	IIA1		3.5	0	10.45	2.5	3.5	2	0	31	0	1	25	3	1	1	2	NA	no						yes	7.55	4.54	286	345	6.12	0.82	10.8	0.14	yes	-	-	1.018	yes	60	34	1.6	yes	5.5	62	yes
P041	M	56	2019-10-21	Squamous cancer	IIA1	G1	3.2	2	22.816	3.2	3	3	0	22	0	0	21	1	1	1	0	54	no						yes	9.24	3.68	168	322	7.84	0.77	8.3	0.02	yes	±	-	1.017	yes	17	22	1.4	yes	3.4	80	yes
P042	M	52	2019-10-23	Squamous cancer	IB1	G3	3	3	6.624	2.4	3	2	0	31	0	0	21	3	1	1	2	NA	yes	+	0			NA	yes	9.1	4.63	374	331	5.31	2.95	32.4	0.11	yes	±	-	1.021	yes	34	28	1.3	yes	4.1	66	no
P043	M	53	2019-10-24	Squamous cancer	IIA1	G3	2.6	2	12.558	2.6	2	2	0	12	0	1	22	4	2	2	2	51	no						yes	4.4	4.36	226	332	2.11	1.86	42.3	0.07	yes	±	-	1.026	yes	13	18	1.3	yes	5.5	59	no
P044	M	57	2019-10-24	Squamous cancer	IIA1	G3	3	4	4.05	2.7	2	2	0	16	0	1	25	1	1	0	1	51	yes	+	0				yes	5.71	4.63	273	337	3.67	1.56	27.3	0.09	yes	±	-	1.02	yes	11	18	1.5	yes	7.4	78	no
P045	M	54	2019-10-25	Squamous cancer	IB1	G1	3.5	3.5	11.616	2.4	2.6	3	0	25	0	0	23	2	1	1	1	50	yes	-					yes	12.14	4.07	119	338	10.08	1.28	10.5	0	yes	±	-	1.026	yes	15	18	1.63	yes	5.9	74	yes
P046	M	58	2019-10-23	Squamous cancer	IB1	G2	3.3	2	20.097	3.3	3	2	0	36	0	1	20	4	1	1	3	54	yes	+	0			31、33、35、39、45、51、52、56、58、59、66、68	yes	6.68	4.38	245	340	4.24	1.96	29.3	0.07	yes	1+	-	1.024	yes	22	23	1.6	yes	5.6	60	yes
P047	M	61	2019-10-28	Squamous cancer	IIA1	G2	3.5	3	20.706	3.4	3.5	2	0	16	0	0	20	3	2	2	1	51	no						yes	5.09	3.51	145	341	4	0.61	12	0.07	yes	-	-	1.024	yes	10	16	1.6	yes	5.2	70	yes
P048	M	64	2019-10-15	Squamous cancer	IIA1	G2	2.9	0	18.125	2.9	2.8	2	0	23	0	1	27	3	1	2	1	47	no						yes	5.81	4.37	306	356	3.71	1.62	27.9	0.03	no				yes	14	16	1.48	yes	3.3	73	yes
P049	M	60	2019-11-04	Squamous cancer	IIA1	G2	4	4	24.354	4.1	3	2	1	39	1	0	26	1	1	1	0	52	no						yes	9.09	3.32	191	326	7.41	1.28	14.1	0.01	no				yes	10	15	1.3	yes	3.5	59	no
P050	M	54	2019-11-04	Squamous cancer	IB1	G3	3.5	3	32.674	3.4	3.5	2	1	45	1	0	20	3	3	0	3	36	yes	+	1			33	yes	5.72	4.77	275	135	2.98	2.3	40.2	0.18	yes	1+	-	1.027	yes	17.8	16.3	1.45	yes	6.8	64.9	yes
P051	M	54	2019-11-18	Squamous cancer	IIA2	G3	4.5		62.092	4.3	4	2	1	27	1	0	27	3	2	1	2	53	yes	+	1			45	yes	8.52	4.8	241	147	5.98	1.84	21.6	0.26	yes	-	-	1.028	yes	18.8	23.6	1.19	yes	6.8	45.2	yes
P052	M	53	2019-10-14	Squamous cancer	IIA1	G3	3	3	23.04	3.2	3	4	0	23	0	1	18	6	6	6	0	50	yes	+	1	1			yes	5.48	4.69	221	313	2.75	2.34	42.7	0.11	yes	-	-	1.017	yes	17.2	17.8	1.53	yes	5.1	42.7	yes
P053	M	56	2019-10-29	Squamous cancer	IIA1	G3	3.5	3.5	NA		3.5	4	1	34	3	1	NA	5	4	4	1	51	yes	+	1	1			yes	7.32	4.22	192	335	5.59	1.29	17.6	0.09	yes	-	-	1.014	yes	15.5	16.1	1.65	yes	3.5	58.1	yes
P054	M	47	2019-11-05	Squamous cancer	IB2	G2	4.5	5	47.04	4.2	3	2	1	30	2	1	24	2	2	0	2	NA	yes	+	1	0	0	26、31、33、35、39、45、51、52、53、56、58、59、66、68、73、81、82	yes	4.08	4.54	226	321	2.43	1.38	33.8	0.06	yes	±	-	1.029	yes	88.8	72.3	1.23	yes	4	55.2	yes
P055	M	55	2019-11-04	Squamous cancer	IIA2	G2	6	5	180	6		3	1	23	?	NA	23	2	1	1	1	53	yes	+		0	0	NA	yes	13.2	3.83	251	108	81.8	12.5	NA	0.2	yes	-	-	1.005	yes	16	16	1.46	yes	no	59.2	yes
P056	M	51	2019-11-08	Squamous cancer	IIA1	G2	3.5	3	20.672	3.4	3	3	0	23	0	1	24	2	0	0	1	50	yes	+		1	0		yes	5.4	5.27	188	145	65.6	1.4	NA	0.06	yes	-	-	1.011	yes	15	21	1.52	yes	no	59.6	yes
P057	M	46	2019-10-17	Squamous cancer	IB1	G2	4	4	21.736	3.8	4	2	0	17	0	NA	25	3	1	2	1	NA	yes	+		0	0	33	yes	8.9	4.12	327	115	63.2	26.1	NA	0.1	yes	-	-	1.018	yes	21	20	1.49	yes	no	62	yes
P058	M	40	2019-10-16	Squamous cancer	IB1	G3	3	3			3	2	0	19	0	NA	17	1	0	0	1	NA	yes	+	1	0	0		yes	7.9	4.63	185	145	58.9	27.2	NA	0.2	yes	-	-	1.022	yes	12	16	1.6	yes	no	50.6	yes
P059	M	41	2019-10-31	Squamous cancer	IB1	G3	1.5		1.404	1.3		2	1	20	3	1	21	5	2	3	2	NA	yes	+	1	1	0		yes	3.6	4.11	170	116	60.2	31.7	NA	0	yes	-	-	1.018	yes	25	25	1.43	yes	no	46.3	yes
P060	M	67	2019-11-19	Squamous cancer	IIA1	G2	4	4	24.025	3.1	4.5	3	0	23	0	NA	21	4	2	2	2	56	yes	+	1	1			yes	6.1	4.47	126	133	87.3	0.5	NA	0.7	yes	+	-	1.011	yes	26	41	1.55	yes	3.8	58	yes
P061	M	52	2019-11-21	Squamous cancer	IB2	G3	3		26.784	3.2	3	3	0	18	0	1	25	3	1	2	1		yes	+	1		1		yes	5	4.53	209	139	57.6	1.8	NA	0.1	yes	+	-	1.017	yes	13	16	1.53	yes	3.72	54.5	yes
P062	M	60	2019-11-22	Squamous cancer	IIA1	G1	3				3	3	1	9	6	1	25	2	2	0	2	49	yes	+	1	1			yes	6.3	4.34	245	139	63.3	1.8	NA	0.11	yes	-	-	1.018	yes	69	36	1.49	yes	4.17	45.7	yes
P063	M	70	2019-12-06	Squamous cancer	IB2	G1	5		87.984	4.8	4.9	3	1	23	1	0	24	6	3	3	3	48	yes	+	1			58	yes	6.4	NA	194	116	73.9	1.2	NA	0.9	yes	-	-	1.017	yes	16	26	1.59	yes	6.77	60.1	yes
P064	M	43	2019-07-16	Squamous cancer	IIA2	G3	5	6	NA		4	4	1	21	1	NA	20	2	1	NA	NA	NA	yes	-					yes	5.9	3.75	255	111	72.6	18.4	NA	1	yes	-	-	1.019	yes	11	18	1.5	yes	2.2	53	no
P065	M	54	2019-10-14	Squamous cancer	IB1	G3	3.5		30.752	3.2	3.5	3	0	23	0	1	NA	3	2	1	2	44	yes	+	1	1	0	45	yes	5.1	4.07	361	327	4.21	2.65	32.7	0.69	yes	-	-	1.034	yes	21	18	1.98	yes	6.82	48	yes
P066	M	67	2019-10-04	Squamous cancer	IIA1	G1	3		30	4	2.5	3	0	8	0	0	25	5	2	3	2	57	no						yes	9.52	4.47	270	123	7.27	1.84	NA	0.06	yes	-	-	1.017	yes	11	17	1.54	yes	5.78	67	yes
P067	M	58	2019-10-31	Squamous cancer	IIA1	G3	3	3	3.52	1.6	2	2	0	18	0	0	22	5	3	2	3	48	no						yes	6.79	4.58	321	136	4.1	1.93	NA	0.15	yes	-	-	1.019	yes	14	21	1.59	yes	3.84	55	yes
P068	M	55	2019-11-15	Squamous cancer	IIA1	G3	2				2	3	0	14	0	0	23	2	2	0	2	47	no						yes	4.82	3.69	342	113	2.28	1.99	NA	0.08	yes	-	-	1.019	yes	22	20	1.62	yes	4.01	55	yes
P069	M	63	2019-11-14	Squamous cancer	IIA1	G2	3.5	2	14.976	2.6	3.5	4	0	26	0	NA	24	6	4	2	6	56	no						yes	3.53	4.03	166	333	2.21	0.92	27.8	0.1	yes	±	-	1.027	yes	20	20	1.52	yes	6.1	66	yes
P070	M	50	2019-09-24	Adenocarcinoma-like	IIA1	G2	3		12.789	2.9		3	0	32	0	NA	20	3	1	1	1	49	yes	+	1	1			yes	4.76	3.99	240	320	2.43	1.64	34.5	0.14	yes	±	-	>1.030	yes	24	20	1.5	yes	5	52	yes
P071	M	48	2019-11-07	Squamous cancer	IIA2	G2	6.5	NA	104.04	6.8		1	0	NA	NA	NA	NA	4	2	NA	NA	49	yes	+	1	1			yes	6.13	3.22	258	109	2.95	2.33	NA	0.09	yes	-	-	1.005	yes	16	17		yes	4.88	50.21	no
P072	M	53	2019-11-10	Squamous cancer	IIIB	G2	2.5	NA	8.712	2.2		2	0	NA	NA	NA	NA	3	3	NA	NA	44	yes	+	1	1	1		yes	5.22	3.2	225	115	4.22	2.88	NA	0.22	yes	-	-	1.009	yes	19	21		yes	2.98	63.22	no
P073	M	49	NA	Squamous cancer	IIB	G2	6	NA	95.04	6		3	0	NA	NA	NA	NA	5	3	NA	NA	45	yes	+	1	1			yes	7.88	3.11	118	98	4.11	1.98	NA	0.25	yes	-	-	1.008	yes	23	16		yes	3.23	48.22	no
P074	M	43	2019-11-11	Squamous cancer	IIIB	G2	5	2	82.368	5.2		3	1	28	6	NA	NA	3	2	NA	NA	NA	yes	+	1	1	1		yes	5.55	4.55	228	112	5.22	2.44	NA	0.33	yes	-	-	1.013	yes	32	23		yes	3.55	52.39	no
P075	M	44	NA	Squamous cancer	IIIB	G3	4	NA	25.536	3.8		NA	0	NA	NA	NA	NA	3	1	NA	NA	50	yes	+	1			58	yes	3.98	4.22	301	110	3.88	3	NA	0.31	yes	-	-	1.022	yes	28	24		yes	4.22	60.23	no
P076	M	51	NA	Squamous cancer	IIIB	G2	6	NA	90.72	5.6		3	0	NA	NA	NA	NA	5	2	NA	NA	50	yes	+	1			52、58	yes	4.58	4.89	287	102	5.28	1.88	NA	0.09	yes	-	-	1.022	yes	29	22		yes	4.58	61.38	no
P077	M	51	2019-06-04	Squamous cancer	IIB	G3	4	5	31.59	3.9	4	3	0	24	0	NA	20	4	3	0	3	NA	no						yes	10.66	4.59	343	340	7.46	1.51	14.2	0.29	yes	2+	-	1.023	yes	11	14	1.41	yes	2.6	64	yes
P078	M	49	2019-03-26	Squamous cancer	IB1	G3	2	2				2	0	31	0	NA	22	3	2	1	2	NA	no						yes	4.54	4.74	174	346	2.41	1.67	36.8	NA	yes	-	-	1.017	yes	8	14	1.54	yes	4.9	63	yes
P079	M	42	2019-03-07	Squamous cancer	IIB	G3	4		46.656	3.6		0	1	14	1	NA	23	2	1	1	1	NA	yes	+	1			45	yes	5.71	4.22	287	362	3.54	1.5	26.3	0.27	yes				yes	13	20	1.47	yes	4.04	52	yes
P080	M	47	2019-05-29	Squamous cancer	IIA2	G2	5	6	4.896	1.8	4	2	0	22	0	NA	23	3	3	0	3	NA	NA						yes	13.26	3.78	191	335	9.78	2.14	16.1	0.4	yes	-	-	1.015	yes	11	11	1.2	yes	4.6	63	yes
P081	M	41	2019-05-09	Squamous cancer	IIB	G3	6		99.876	5.8		2	0	26	0	NA	21	8	3	5	3	NA	yes	+				A7 group	yes	9.43	4.09	123	310	7.48	0.9	9.5	0.51	yes	±	-	1.02	yes	21	19	0.98	yes	3.61	67	yes
P082	M	54	2019-08-01	Squamous cancer	IB1	G2	3.5	2	3.12	1.6	3.5	4	1	33	1	1	25	4	1	3	1	46	yes	+	1	1		58	yes	3.83	3.39	212	320	1.94	1.26	32.9	0.15	yes	-	-	1.02	yes	25	31	1.51	yes	6.45	74	yes
P083	M	59	2019-09-26	Squamous cancer	IIA1	G3	3	3	13.311	2.9	3	1	0	19	0	1	23	2	1	1	1	52	no						yes	6.1	3.84	231	327	3.51	2.1	34.4	0.11	yes	±	-	1.025	yes	7	12	1.52	yes	3.6	55	no
P084	M	44	2019-10-14	Squamous cancer	IB1	G3	1.5	1	1.5	1.5	1.5	1	0	20	0	1	23	4	2	2	2	NA	no						yes	5.06	4.01	224	338	2.84	1.55	30.6	0.2	yes	±	-	1.014	yes	9	14	1.82	yes	4.6	61	yes
P085	M	51	NA	Squamous cancer	IB1	G2	3	3			3	1	0	32	0	0	20	2	1	1	1	50	no						yes	6.28	4.61	292	361	3.2	2.38	37.9	0.24	yes	-	-	1.022	yes	14	19	1.5	yes	6	81	yes
P086	M	38	2019-09-23	Squamous cancer	IB1	G3	4		40.32	4	2.3	2	1	47	4	1	21	5	2	2	3	NA	yes	+	1	1			yes	7.32	6.29	332	304	4.64	2.1	28.7	0.13	yes	-	-	1.019	yes	10.8	17.4	1.44	yes	4.7	59.3	yes
P087	M	54	2019-11-11	Squamous cancer	IB1	G2	3.5		42.24	4	3.5	3	0	31	0	1	24	3	3	3	0	49	yes	+	1			26、31、33、35、39、45、51、52、53、56、58、59、66、68、73、81、82	yes	4.23	4.33	269	327	2.05	1.75	41.4	0.18	yes	-	-	1.01	yes	18.8	24.4	1.37	yes	4.4	69.9	yes
P088	M	47	2019-11-22	Squamous cancer	IB1	G3	1.5	1.5	2.688	1.6	1.5	2	0	16	0	NA	27	2	1	1	1	NA	yes	+	1			45	yes	4.1	3.74	166	118	58.6	33.6	NA	0.02	no	+	-	1.011	yes	13	15	1.48	yes	no	54	yes
P089	M	23	2019-08-15	Squamous cancer	IIB	G3	4	NA	NA		NA	4	0	23	0	NA	NA	NA	NA	NA	NA	NA	yes	-					yes	4.9	4.98	191	94	64	27.1	NA	1.6	yes	-	-	1.026	yes	30	35	1.3	yes	5.4	60	yes
P090	M	55	2019-11-20	Squamous cancer	IB2	G1	6	4			9.3	3	0	11	0	0	18	3	2	1	2	52	no						yes	3.66	4.22	210	120	2.51	0.81	NA	0.09	yes	-	-	1.025	yes	8	21	1.46	yes	5.48	58	yes
P091	M	67	NA	Squamous cancer	IIIB	G2	6	4	60.76	6.2		NA	0	NA	NA	NA	NA	4	3	NA	NA	53	yes	+	1	1			yes	4.52	4.28	197	89	6.02	1.96	NA	0.27	yes	-	-	1.018	yes	30	33		yes	6.65	59.48	no
P092	M	47	NA	Squamous cancer	IIIB	G2	4.5	NA	64.935	4.5		3	0	NA	NA	NA	NA	1	1	NA	NA	52	yes	+	1	1			yes	5.28	5.38	234	100	5.44	1.59	NA	0.12	yes	-	-	1.014	yes	32	28		yes	7.28	39.58	no
P093	M	49	2019-11-03	Squamous cancer	IIIB	G2	5	1	80.496	4.8		NA	1	NA	NA	NA	NA	2	1	NA	NA	47	yes	+	1			52、58	yes	6.32	4.59	254	102	4.78	3.25	NA	0.09	yes	-	-	1.015	yes	24	18		yes	7.29	40.28	no
P094	M	53	NA	Squamous cancer	IIIB	G2	3.5	NA	11.52	3.2		NA	0	NA	NA	NA	NA	3	1	NA	NA	48	yes	+	1	1			yes	8.27	3.78	233	99	3.99	2.54	NA	0.2	yes	-	-	1.014	yes	29	20		yes	6.36	40.66	no
P095	M	58	2019-08-01	Squamous cancer	IIA2	G3	5	3	35.802	3.9	5	4	0	19	0	0	20	3	3	0	3	50	no						yes	3.82	3.95	141	319	2.34	1.18	30.9	0.11	yes	-	-	1.007	yes	9	11	1.53	yes	7.96	70	yes
P096	M	50	2015-09-10	Squamous cancer	IIA1	G3	3	2	18	4.5		3	1	21	1	1	24	4	1	3	1	NA	no						yes	5.18	4.02	327	117	3.16	1.74	NA	0.02	yes	-	-	1.01	yes	12	19	1.45	yes	3.64	65	yes
P097	M	33	2015-09-10	Squamous cancer	IIA1	G3	3.4	0	30.464	3.4		3	0	22	0	0	27	3	2	1	2	NA	yes	+	0				yes	3.94	3.28	312	82	2.58	1.01	NA	0.1	no	-	-		yes	17	13	1.6	yes	3.36	48	yes
P098	M	43	2017-05-30	NA	NA	NA	NA	NA	NA	NA	NA	NA	NA	NA	NA	NA	NA	NA	NA	NA	NA	NA	NA						NA	NA	NA	NA	NA	NA	NA	NA	NA	NA	NA	NA	NA	NA	NA	NA	NA	NA	NA	NA	NA
P099	M	32	2019-01-07	Squamous cancer	IB1	G1	2.6	0	7.956	2.6	3	3	0	25	0	1	25	2	2	0	2	NA	yes	+	1	1			yes	4.97	4.45	172	334	2.98	1.44	29	0.21	yes	＋	-	1.019	yes	13	18	2.1	yes	3.62	48	yes
P100	M	54	2019-10-24	Squamous cancer	IB1	G2	3	2	12.65	2.5	3	2	0	24	0	0	25	3	1	2	1	50	no						yes	5.6	3.67	137	334	4.59	0.5	8.9	0.03	yes	±	-	1.021	yes	11	16	1.52	yes	4.8	74	no
P101	M	34	2019-10-28	Squamous cancer	IIA1	G2	3	1.5	2.016	1.4	3	2	0	19	0	1	24	5	1	1	4	NA	no						yes	4.63	4.29	268	325	2.56	1.76	38	0.05	no				yes	8	18	1.4	yes	4.7	71	no
P102	M	54	2019-09-10	Squamous cancer	IB1	G3	3.5	3	29.016	3.6	4	1	0	26	0	0	20	5	5	0	5	52	yes	+	1	1	0	0	yes	7.26	5.79	306	303	4.25	2.55	35.1	0.08	yes	-	-	1.035	yes	10.5	14.5	1.39	yes	4.6	54.2	yes
P103	M	62	2019-09-23	Squamous cancer	IB1	G2	2.5	2.5				2	0	17	0	0	25	3	0	0	3	55	yes	+	1	1			yes	5.3	4.34	246	133	62.3	62.3	NA	0.2	yes	+	-	1.014	yes	23	24	1.49	yes	no	76.5	yes
P104	M	30	2019-10-14	Squamous cancer	IB2	G2	5		114.586	5.3	3.7	3	1	31	2	0	24	2	2	0	2	NA	no						yes	7.45	4.12	294	125	4.28	2.46	NA	0.26	yes	-	-	1.022	yes	14	15	1.69	yes	5.6	81	yes
P105	M	42	2019-10-18	Squamous cancer	IB1	G3	2.5		5.888	2.3	2.5	1	0	11	0	0	23	1	1	0	1	NA	no						yes	5.42	4.43	217	132	60.4	28.4	NA	2.2	yes	-	-	1.017	yes	9	18	1.81	yes	2.77	60	yes
P106	M	31	2019-09-26	Squamous cancer	IIA1	G3	4	3	12	3	4	4	1	14	4	0	23	4	2	2	2	NA	no						yes	7.81	3.84	282	120	5.98	1.32	NA	0.14	yes	-	-	1.027	yes	5	15	1.72	yes	3.6	47	yes
P107	M	40	2019-09-20	Squamous cancer	IB1	G3	2.5	4			1.8	1	0	25	0	0	25	5	2	3	2	NA	no						yes	2.56	3.79	201	95	1.29	0.95	NA	0.02	yes	-	-	1.006	yes	14	18	1.55	yes	4.37	53	yes
P108	M	50	2019-11-04	Squamous cancer	IB1	G3	3		16.128	2.8		3	1	21	3	NA	21	3	1	2	1	42	no						yes	5	3.25	272	336	2.84	1.38	27.6	0.23	yes	1+	-	1.01	yes	10	19	1.19	yes	6.3	76	yes
P109	M	54	2019-09-30	Squamous cancer	IB1	G3	3	2.5	13.92	2.9		2	1	21	1	NA	22	2	1	1	1	53	yes	+	1			A9 group	yes	4.32	4.27	225	329	2.14	1.8	41.7	0.08	yes	1+	-	1.03	yes	19	18	1.63	yes	6.1	64	yes
P110	M	44	2019-10-30	Squamous cancer	IB2	G2	4.5	NA	51.072	4.2		0	0	NA	NA	NA	23	3	1	NA	NA	NA	yes	+	1			58	yes	5.08	3.67	97	114	3.18	1.5	NA	0.06	yes	-	-	1.011	yes	26	19		yes	5.66	49.9	no
P111	M	56	2019-02-14	Squamous cancer	IIB	G2	6	6.5	72.283	4.3	6	4	1	20	2	1	24	5	5	0	5	39	yes	+	1	1			yes	8.7	4.17	247	326	4.28	3.22	37	0.6	yes	-	-	1.018	yes	16	27	1.04	yes	4.44	58	yes
P112	M	54	NA	Squamous cancer	IIIB	G2	6.5	2	212.524	6.7		3	0	NA	NA	NA	NA	2	2	NA	NA	NA	yes	+	1			33、52	yes	4.33	6.28	202	94	6.22	2.13	NA	0.18	yes	-	-	1.008	yes	33	29		yes	6.58	78.26	no
P113	M	52	2015-05-27	Squamous cancer	IB1	G3	3.5	3	7.5	3	3.5	3	0	17	0	0	24	2	1	1	1	46	no						yes	4.55	4.3	230	131	2.51	1.52	NA	0.1	yes	-	-	1.015	yes	15	17	1.68	yes	4.2	56	yes
P114	M	71	2019-04-30	Squamous cancer	IB2	G3	5	5	10.368	3.2	4.5	3	1	24	2	NA	20	7	7	0	7	58	NA						yes	6.52	4	307	320	3.99	1.54	23.6	0.53	yes	±	-	1.025	yes	16	18	1.34	yes	6.7	63	yes
[truncated: 62 more columns]
